# Supplementary material
Source: PubMed Central journal article supplement (PMC3277896)
Supplement: emm-44-36-s001.pdf [file emm-44-36-s001.pdf]

**A**

| Probability | Precursor | z | MH <sup>+</sup> | ΔCn   | Xcorr | Peptide               |
|-------------|-----------|---|-----------------|-------|-------|-----------------------|
| 0.9815      | 51.03     | 4 | 2037.11         | 0.257 | 3.307 | M.AAAPTQIEAEELYLIAR.F |

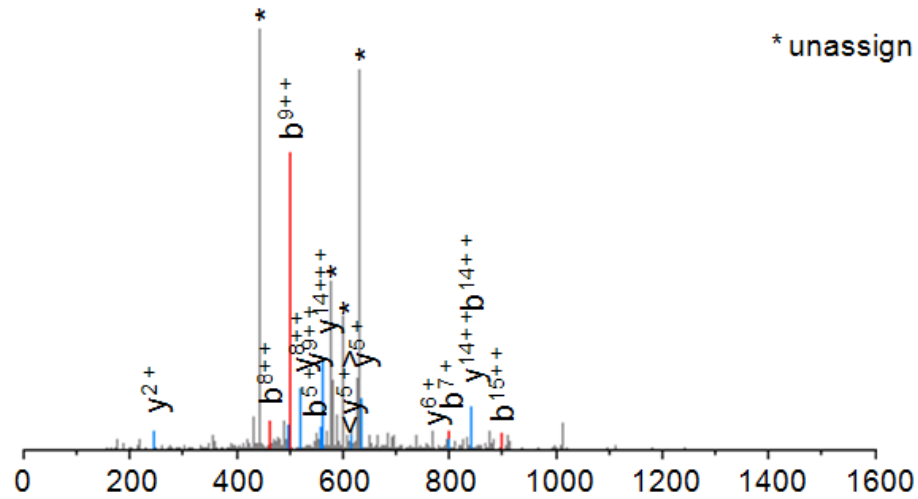**B**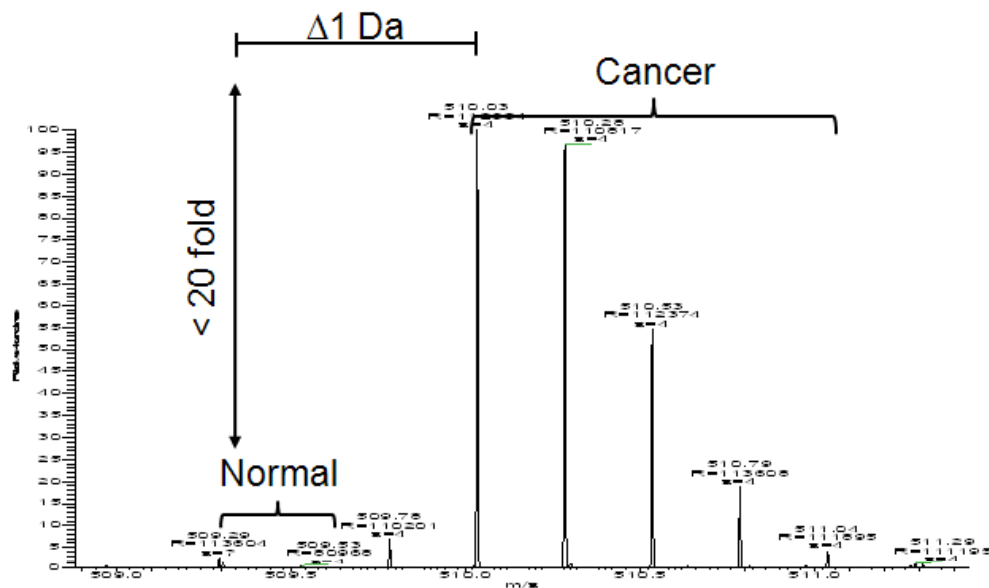**Supplemental Figure 1. Identification and Quantification of the BRWD3. (A)**

MS analysis output identifying BRWD3 protein. MH<sup>+</sup>, theoretical mass for the 4<sup>+</sup> charged molecular ion; ΔCn, delta correlation; Xcorr, cross-correlation score.

Tandem mass spectrum for the selected precursor ion is shown below. Spectrum was generated using the Trans Proteomic Pipeline. (B) Quantification of BRW1 through the mTRAQ-labeled parent ion signal of peptide \* AAAPTQIEAEELYLIAR.

Supplemental Table 1. List of peptides identified by mTRAQ and LC-MSMS.

| entry no. | accession number <sup>a</sup> | probability | coverage | protein ratio (1/4) | SD <sup>b</sup> | XNP <sup>c</sup> | USP <sup>b</sup> | protein name                                         | peptide sequence             | z <sup>c</sup> | m/z      | Xcorr | deltCn |
|-----------|-------------------------------|-------------|----------|---------------------|-----------------|------------------|------------------|------------------------------------------------------|------------------------------|----------------|----------|-------|--------|
| 1         | IPI00001610                   | 1           | 11.1     | 0.67                | 0               | 2                | 2                | IGF1 Insulin-like growth factor IA precursor         | GFYFNKPTGYGSSSR              | 3              | 649.9953 | 3.596 | 0.345  |
| 1         | IPI00001610                   | 1           | 11.1     | 0.67                | 0               | 2                | 2                | IGF1 Insulin-like growth factor IA precursor         | n[145]GFYFNK[272]PTGYGSSSR   | 3              | 652.6667 | 3.664 | 0.316  |
| 2         | IPI00003351                   | 1           | 9.2      | 1.07                | 0.11            | 11               | 6                | ECM1 Extracellular matrix protein 1 precursor        | LTFINDLCGPR                  | 2              | 717.8652 | 3.775 | 0.428  |
| 2         | IPI00003351                   | 1           | 9.2      | 1.07                | 0.11            | 11               | 6                | ECM1 Extracellular matrix protein 1 precursor        | n[145]LTFINDLCGPR            | 2              | 719.8688 | 2.648 | 0.339  |
| 2         | IPI00003351                   | 1           | 9.2      | 1.07                | 0.11            | 11               | 6                | ECM1 Extracellular matrix protein 1 precursor        | LLPAQLPAEK                   | 2              | 680.4216 | 2.905 | 0.344  |
| 2         | IPI00003351                   | 1           | 9.2      | 1.07                | 0.11            | 11               | 6                | ECM1 Extracellular matrix protein 1 precursor        | n[145]RAPYPNYDR              | 3              | 432.5586 | 1.928 | 0.11   |
| 2         | IPI00003351                   | 1           | 9.2      | 1.07                | 0.11            | 11               | 6                | ECM1 Extracellular matrix protein 1 precursor        | VTPNLM[147]GH                | 2              | 512.7659 | 1.909 | 0.056  |
| 2         | IPI00003351                   | 1           | 9.2      | 1.07                | 0.11            | 11               | 6                | ECM1 Extracellular matrix protein 1 precursor        | n[145]VTPNLM[147]GH          | 2              | 514.7694 | 2.066 | 0.244  |
| 2         | IPI00003351                   | 1           | 9.2      | 1.07                | 0.11            | 11               | 6                | ECM1 Extracellular matrix protein 1 precursor        | AQLPAEK                      | 2              | 518.8112 | 1.728 | 0.078  |
| 3         | IPI00003590                   | 1           | 6.6      | 0.86                | 0.1             | 4                | 4                | QSOX1 Isoform 1 of Sulfhydryl oxidase 1 precursor    | n[145]AHFSPSNIILDFFAAGSAAR   | 3              | 729.3873 | 2.878 | 0.298  |
| 3         | IPI00003590                   | 1           | 6.6      | 0.86                | 0.1             | 4                | 4                | QSOX1 Isoform 1 of Sulfhydryl oxidase 1 precursor    | n[145]SFYTAYLQR              | 2              | 646.8414 | 2.619 | 0.297  |
| 3         | IPI00003590                   | 1           | 6.6      | 0.86                | 0.1             | 4                | 4                | QSOX1 Isoform 1 of Sulfhydryl oxidase 1 precursor    | n[145]AAPGQEPPEHM[147]AELQR  | 3              | 640.9833 | 2.989 | 0.28   |
| 3         | IPI00003590                   | 1           | 6.6      | 0.86                | 0.1             | 4                | 4                | QSOX1 Isoform 1 of Sulfhydryl oxidase 1 precursor    | SFYTAYLQR                    | 2              | 644.8379 | 2.715 | 0.067  |
| 3         | IPI00003590                   | 1           | 6.6      | 0.86                | 0.1             | 4                | 4                | QSOX1 Isoform 1 of Sulfhydryl oxidase 1 precursor    | YILR                         | 2              | 352.7263 | 1.622 | 0.012  |
| 4         | IPI00006114                   | 1           | 34.9     | 1.04                | 0.27            | 35               | 23               | SERPINF1 Pigment epithelium-derived factor precursor | LQSLFDSPDFSK                 | 2              | 832.4382 | 4.518 | 0.5    |
| 4         | IPI00006114                   | 1           | 34.9     | 1.04                | 0.27            | 35               | 23               | SERPINF1 Pigment epithelium-derived factor precursor | n[145]AAVSNFGYDLYR           | 2              | 760.3867 | 4.243 | 0.373  |
| 4         | IPI00006114                   | 1           | 34.9     | 1.04                | 0.27            | 35               | 23               | SERPINF1 Pigment epithelium-derived factor precursor | n[145]LAAAVSNFGYDLYR         | 2              | 852.4473 | 3.584 | 0.392  |
| 4         | IPI00006114                   | 1           | 34.9     | 1.04                | 0.27            | 35               | 23               | SERPINF1 Pigment epithelium-derived factor precursor | n[145]LQSLFDSPDFSK[272]      | 2              | 836.4453 | 3.93  | 0.263  |
| 4         | IPI00006114                   | 1           | 34.9     | 1.04                | 0.27            | 35               | 23               | SERPINF1 Pigment epithelium-derived factor precursor | ALYYDLISSPDIHGTYK            | 3              | 746.0598 | 5.58  | 0.49   |
| 4         | IPI00006114                   | 1           | 34.9     | 1.04                | 0.27            | 35               | 23               | SERPINF1 Pigment epithelium-derived factor precursor | n[145]ALYYDLISSPDIHGTYK[272] | 3              | 748.7312 | 5.187 | 0.494  |
| 4         | IPI00006114                   | 1           | 34.9     | 1.04                | 0.27            | 35               | 23               | SERPINF1 Pigment epithelium-derived factor precursor | n[145]EIPDEISILLGVAHFVK[272] | 3              | 728.0957 | 4.175 | 0.288  |
| 4         | IPI00006114                   | 1           | 34.9     | 1.04                | 0.27            | 35               | 23               | SERPINF1 Pigment epithelium-derived factor precursor | n[145]ELLDTVTAPQK[272]       | 2              | 751.9371 | 3.631 | 0.386  |
| 4         | IPI00006114                   | 1           | 34.9     | 1.04                | 0.27            | 35               | 23               | SERPINF1 Pigment epithelium-derived factor precursor | n[145]YGLDSDLCK[272]         | 2              | 717.846  | 3.359 | 0.407  |
| 4         | IPI00006114                   | 1           | 34.9     | 1.04                | 0.27            | 35               | 23               | SERPINF1 Pigment epithelium-derived factor precursor | LSYEGEVTK                    | 2              | 653.3561 | 2.722 | 0.283  |
| 4         | IPI00006114                   | 1           | 34.9     | 1.04                | 0.27            | 35               | 23               | SERPINF1 Pigment epithelium-derived factor precursor | n[145]TESIIHR                | 2              | 500.2888 | 2.847 | 0.214  |
| 4         | IPI00006114                   | 1           | 34.9     | 1.04                | 0.27            | 35               | 23               | SERPINF1 Pigment epithelium-derived factor precursor | n[145]ITGK[272]PIK[272]      | 2              | 594.9057 | 2.731 | 0.22   |
| 4         | IPI00006114                   | 1           | 34.9     | 1.04                | 0.27            | 35               | 23               | SERPINF1 Pigment epithelium-derived factor precursor | n[145]SSFVAPLEK[272]         | 2              | 633.3708 | 2.712 | 0.258  |
| 4         | IPI00006114                   | 1           | 34.9     | 1.04                | 0.27            | 35               | 23               | SERPINF1 Pigment epithelium-derived factor precursor | n[145]VLTGNPR                | 2              | 450.7728 | 2.513 | 0.173  |
| 4         | IPI00006114                   | 1           | 34.9     | 1.04                | 0.27            | 35               | 23               | SERPINF1 Pigment epithelium-derived factor precursor | KTSLEDFYLDEER                | 3              | 642.3266 | 2.918 | 0.173  |
| 4         | IPI00006114                   | 1           | 34.9     | 1.04                | 0.27            | 35               | 23               | SERPINF1 Pigment epithelium-derived factor precursor | YGLDSDLCK                    | 2              | 713.8389 | 2.687 | 0.295  |
| 4         | IPI00006114                   | 1           | 34.9     | 1.04                | 0.27            | 35               | 23               | SERPINF1 Pigment epithelium-derived factor precursor | n[145]LTQVEHR                | 2              | 513.7943 | 2.447 | 0.133  |
| 4         | IPI00006114                   | 1           | 34.9     | 1.04                | 0.27            | 35               | 23               | SERPINF1 Pigment epithelium-derived factor precursor | ITGKPIK                      | 2              | 588.895  | 2.338 | 0.096  |
| 4         | IPI00006114                   | 1           | 34.9     | 1.04                | 0.27            | 35               | 23               | SERPINF1 Pigment epithelium-derived factor precursor | n[145]LSYEGEVTK[272]         | 2              | 657.3632 | 1.801 | 0.185  |
| 4         | IPI00006114                   | 1           | 34.9     | 1.04                | 0.27            | 35               | 23               | SERPINF1 Pigment epithelium-derived factor precursor | ELLDTVTAPQK                  | 2              | 747.93   | 2.164 | 0.129  |
| 4         | IPI00006114                   | 1           | 34.9     | 1.04                | 0.27            | 35               | 23               | SERPINF1 Pigment epithelium-derived factor precursor | n[145]ITGK[272]PIK[272]      | 3              | 396.9395 | 1.769 | 0.072  |
| 4         | IPI00006114                   | 1           | 34.9     | 1.04                | 0.27            | 35               | 23               | SERPINF1 Pigment epithelium-derived factor precursor | n[145]SLQEM[147]K[272]       | 2              | 520.2885 | 1.641 | 0.043  |
| 4         | IPI00006114                   | 1           | 34.9     | 1.04                | 0.27            | 35               | 23               | SERPINF1 Pigment epithelium-derived factor precursor | ALYYDLISSPDIHGTYK            | 4              | 559.7967 | 1.84  | 0.044  |
| 4         | IPI00006114                   | 1           | 34.9     | 1.04                | 0.27            | 35               | 23               | SERPINF1 Pigment epithelium-derived factor precursor | AAVSNFGYDLYR                 | 2              | 758.3832 | 2.749 | 0.206  |
| 4         | IPI00006114                   | 1           | 34.9     | 1.04                | 0.27            | 35               | 23               | SERPINF1 Pigment epithelium-derived factor precursor | EM[147]K                     | 1              | 703.3808 | 1.121 | 0.072  |
| 5         | IPI00006146                   | 1           | 34.4     | 0.7                 | 0.12            | 6                | 6                | SAA1;SAA2 serum amyloid A2                           | n[145]SFFSFLGEAFDGR          | 2              | 847.9184 | 4.657 | 0.449  |
| 5         | IPI00006146                   | 1           | 34.4     | 0.7                 | 0.12            | 6                | 6                | SAA1;SAA2 serum amyloid A2                           | n[145]EANYIGSDK[272]         | 2              | 642.8374 | 2.886 | 0.26   |
| 5         | IPI00006146                   | 1           | 34.4     | 0.7                 | 0.12            | 6                | 6                | SAA1;SAA2 serum amyloid A2                           | EANYIGSDK                    | 2              | 638.8303 | 2.4   | 0.303  |
| 5         | IPI00006146                   | 1           | 34.4     | 0.7                 | 0.12            | 6                | 6                | SAA1;SAA2 serum amyloid A2                           | n[145]YFHAR                  | 2              | 419.228  | 2.15  | 0.188  |

|    |             |   |      |      |      |    |    |                                                            |                                |   |          |       |       |
|----|-------------|---|------|------|------|----|----|------------------------------------------------------------|--------------------------------|---|----------|-------|-------|
| 5  | IPI00006146 | 1 | 34.4 | 0.7  | 0.12 | 6  | 6  | SAA1;SAA2 serum amyloid A2                                 | n[145]DPNHFRPAGLPEK[272]Y      | 3 | 643.6789 | 2.891 | 0.231 |
| 5  | IPI00006146 | 1 | 34.4 | 0.7  | 0.12 | 6  | 6  | SAA1;SAA2 serum amyloid A2                                 | DPNHFRPAGLPEKY                 | 3 | 641.0075 | 2.372 | 0.113 |
| 6  | IPI00006662 | 1 | 33.3 | 0.88 | 0.06 | 18 | 12 | APOD Apolipoprotein D precursor                            | CPNPPVQENFDVNK                 | 2 | 963.9637 | 3.832 | 0.473 |
| 6  | IPI00006662 | 1 | 33.3 | 0.88 | 0.06 | 18 | 12 | APOD Apolipoprotein D precursor                            | NILTSNNIDVK                    | 2 | 755.9331 | 4.21  | 0.429 |
| 6  | IPI00006662 | 1 | 33.3 | 0.88 | 0.06 | 18 | 12 | APOD Apolipoprotein D precursor                            | n[145]NILTSNNIDVK[272]         | 2 | 759.9402 | 4.216 | 0.4   |
| 6  | IPI00006662 | 1 | 33.3 | 0.88 | 0.06 | 18 | 12 | APOD Apolipoprotein D precursor                            | KM[147]TVTDQVNCPK              | 3 | 615.9843 | 3.913 | 0.297 |
| 6  | IPI00006662 | 1 | 33.3 | 0.88 | 0.06 | 18 | 12 | APOD Apolipoprotein D precursor                            | M[147]TVTDQVNCPK               | 2 | 789.3779 | 3.903 | 0.392 |
| 6  | IPI00006662 | 1 | 33.3 | 0.88 | 0.06 | 18 | 12 | APOD Apolipoprotein D precursor                            | n[145]NPNLPPETVDSLK[272]       | 2 | 856.4771 | 3.284 | 0.307 |
| 6  | IPI00006662 | 1 | 33.3 | 0.88 | 0.06 | 18 | 12 | APOD Apolipoprotein D precursor                            | n[145]CPNPPVQENFDVNK[272]      | 2 | 967.9708 | 3.259 | 0.347 |
| 6  | IPI00006662 | 1 | 33.3 | 0.88 | 0.06 | 18 | 12 | APOD Apolipoprotein D precursor                            | VLNQELR                        | 2 | 506.3009 | 2.496 | 0.115 |
| 6  | IPI00006662 | 1 | 33.3 | 0.88 | 0.06 | 18 | 12 | APOD Apolipoprotein D precursor                            | n[145]WYEIEK[272]              | 2 | 578.3181 | 2.223 | 0.1   |
| 6  | IPI00006662 | 1 | 33.3 | 0.88 | 0.06 | 18 | 12 | APOD Apolipoprotein D precursor                            | n[145]VLNQELR                  | 2 | 508.3045 | 2.44  | 0.041 |
| 6  | IPI00006662 | 1 | 33.3 | 0.88 | 0.06 | 18 | 12 | APOD Apolipoprotein D precursor                            | NPNLPPETVDSLK                  | 2 | 852.47   | 1.97  | 0.038 |
| 6  | IPI00006662 | 1 | 33.3 | 0.88 | 0.06 | 18 | 12 | APOD Apolipoprotein D precursor                            | n[145]NILTSNNIDVK[272]         | 3 | 506.9625 | 2.031 | 0.127 |
| 7  | IPI00007047 | 1 | 20.4 | 1.6  | 0.13 | 5  | 5  | S100A8 Protein S100-A8                                     | ALNSIIDVYHK                    | 2 | 776.946  | 3.934 | 0.421 |
| 7  | IPI00007047 | 1 | 20.4 | 1.6  | 0.13 | 5  | 5  | S100A8 Protein S100-A8                                     | ALNSIIDVYHK                    | 3 | 518.2997 | 4.032 | 0.386 |
| 7  | IPI00007047 | 1 | 20.4 | 1.6  | 0.13 | 5  | 5  | S100A8 Protein S100-A8                                     | n[145]ALNSIIDVYHK[272]         | 3 | 520.9711 | 4.011 | 0.374 |
| 7  | IPI00007047 | 1 | 20.4 | 1.6  | 0.13 | 5  | 5  | S100A8 Protein S100-A8                                     | GNFHAVYR                       | 3 | 368.5297 | 2.206 | 0.166 |
| 7  | IPI00007047 | 1 | 20.4 | 1.6  | 0.13 | 5  | 5  | S100A8 Protein S100-A8                                     | GNFHAVYR                       | 2 | 552.2909 | 2.483 | 0.134 |
| 8  | IPI00007199 | 1 | 9.3  | 0.65 | 0.17 | 6  | 4  | SERPINA10 Protein Z-dependent protease inhibitor precursor | n[145]LILVDYILFK[272]          | 2 | 762.9858 | 3.212 | 0.369 |
| 8  | IPI00007199 | 1 | 9.3  | 0.65 | 0.17 | 6  | 4  | SERPINA10 Protein Z-dependent protease inhibitor precursor | n[145]JFSPFADLSELSATGR         | 2 | 927.9896 | 2.585 | 0.199 |
| 8  | IPI00007199 | 1 | 9.3  | 0.65 | 0.17 | 6  | 4  | SERPINA10 Protein Z-dependent protease inhibitor precursor | n[145]ETSNGFSLLR               | 2 | 707.876  | 2.497 | 0.147 |
| 8  | IPI00007199 | 1 | 9.3  | 0.65 | 0.17 | 6  | 4  | SERPINA10 Protein Z-dependent protease inhibitor precursor | n[145]TVIEVDER                 | 2 | 552.8045 | 1.25  | 0.029 |
| 9  | IPI00007221 | 1 | 16.7 | 0.96 | 0.09 | 11 | 9  | SERPINA5 Plasma serine protease inhibitor precursor        | GFQQLQELNQPR                   | 2 | 855.9679 | 5.238 | 0.414 |
| 9  | IPI00007221 | 1 | 16.7 | 0.96 | 0.09 | 11 | 9  | SERPINA5 Plasma serine protease inhibitor precursor        | n[145]GFQQLQELNQPR             | 2 | 857.9715 | 4.931 | 0.381 |
| 9  | IPI00007221 | 1 | 16.7 | 0.96 | 0.09 | 11 | 9  | SERPINA5 Plasma serine protease inhibitor precursor        | RVEDLHVGVATVAPSSR              | 3 | 612.0025 | 2.933 | 0.329 |
| 9  | IPI00007221 | 1 | 16.7 | 0.96 | 0.09 | 11 | 9  | SERPINA5 Plasma serine protease inhibitor precursor        | AVVEVDESGTR                    | 2 | 651.3384 | 3.449 | 0.453 |
| 9  | IPI00007221 | 1 | 16.7 | 0.96 | 0.09 | 11 | 9  | SERPINA5 Plasma serine protease inhibitor precursor        | n[145]AVVEVDESGTR              | 2 | 653.342  | 3.374 | 0.37  |
| 9  | IPI00007221 | 1 | 16.7 | 0.96 | 0.09 | 11 | 9  | SERPINA5 Plasma serine protease inhibitor precursor        | AAAATGTIFTR                    | 2 | 683.8775 | 3.196 | 0.219 |
| 9  | IPI00007221 | 1 | 16.7 | 0.96 | 0.09 | 11 | 9  | SERPINA5 Plasma serine protease inhibitor precursor        | n[145]AAAATGTIFTR              | 2 | 685.8811 | 3.447 | 0.221 |
| 9  | IPI00007221 | 1 | 16.7 | 0.96 | 0.09 | 11 | 9  | SERPINA5 Plasma serine protease inhibitor precursor        | n[145]TLYLADTFPTNFR            | 2 | 851.9497 | 3.18  | 0.281 |
| 9  | IPI00007221 | 1 | 16.7 | 0.96 | 0.09 | 11 | 9  | SERPINA5 Plasma serine protease inhibitor precursor        | n[145]GFQQLQELNQPR             | 3 | 572.3167 | 2.136 | 0.002 |
| 9  | IPI00007221 | 1 | 16.7 | 0.96 | 0.09 | 11 | 9  | SERPINA5 Plasma serine protease inhibitor precursor        | EM[147]K                       | 1 | 703.3808 | 1.121 | 0.072 |
| 10 | IPI00007240 | 1 | 14.7 | 0.96 | 0.07 | 21 | 19 | F13B Coagulation factor XIII B chain precursor             | IAQYYTFFK                      | 2 | 738.898  | 3.914 | 0.425 |
| 10 | IPI00007240 | 1 | 14.7 | 0.96 | 0.07 | 21 | 19 | F13B Coagulation factor XIII B chain precursor             | VLHGDLDIVCK                    | 2 | 842.9493 | 4.249 | 0.525 |
| 10 | IPI00007240 | 1 | 14.7 | 0.96 | 0.07 | 21 | 19 | F13B Coagulation factor XIII B chain precursor             | n[145]CFDHHFLEGSR              | 2 | 769.3435 | 3.646 | 0.516 |
| 10 | IPI00007240 | 1 | 14.7 | 0.96 | 0.07 | 21 | 19 | F13B Coagulation factor XIII B chain precursor             | n[145]IAQYYTFFK[272]           | 2 | 742.9051 | 4.056 | 0.465 |
| 10 | IPI00007240 | 1 | 14.7 | 0.96 | 0.07 | 21 | 19 | F13B Coagulation factor XIII B chain precursor             | n[145]VLHGDLDIVCK[272]         | 2 | 846.9564 | 4.002 | 0.537 |
| 10 | IPI00007240 | 1 | 14.7 | 0.96 | 0.07 | 21 | 19 | F13B Coagulation factor XIII B chain precursor             | n[145]SGYLLHGSNEITCNR          | 3 | 618.63   | 4.277 | 0.344 |
| 10 | IPI00007240 | 1 | 14.7 | 0.96 | 0.07 | 21 | 19 | F13B Coagulation factor XIII B chain precursor             | CFDHHFLEGSR                    | 4 | 384.1736 | 2.815 | 0.434 |
| 10 | IPI00007240 | 1 | 14.7 | 0.96 | 0.07 | 21 | 19 | F13B Coagulation factor XIII B chain precursor             | LIENGYFHPVK                    | 3 | 532.9681 | 2.81  | 0.19  |
| 10 | IPI00007240 | 1 | 14.7 | 0.96 | 0.07 | 21 | 19 | F13B Coagulation factor XIII B chain precursor             | VLHGDLDIVCK                    | 3 | 562.302  | 3.503 | 0.331 |
| 10 | IPI00007240 | 1 | 14.7 | 0.96 | 0.07 | 21 | 19 | F13B Coagulation factor XIII B chain precursor             | n[145]LIENGYFHPVK[272]         | 3 | 535.6395 | 3.69  | 0.277 |
| 10 | IPI00007240 | 1 | 14.7 | 0.96 | 0.07 | 21 | 19 | F13B Coagulation factor XIII B chain precursor             | n[145]VACEEPPFIENGAANLHSK[272] | 3 | 787.3921 | 4.793 | 0.301 |
| 10 | IPI00007240 | 1 | 14.7 | 0.96 | 0.07 | 21 | 19 | F13B Coagulation factor XIII B chain precursor             | n[145]CFDHHFLEGSR              | 4 | 385.1754 | 2.441 | 0.332 |
| 10 | IPI00007240 | 1 | 14.7 | 0.96 | 0.07 | 21 | 19 | F13B Coagulation factor XIII B chain precursor             | n[145]CNEYLLR                  | 2 | 632.3028 | 3.248 | 0.326 |
| 10 | IPI00007240 | 1 | 14.7 | 0.96 | 0.07 | 21 | 19 | F13B Coagulation factor XIII B chain precursor             | IQTHSTTYR                      | 2 | 623.8306 | 2.287 | 0.23  |
| 10 | IPI00007240 | 1 | 14.7 | 0.96 | 0.07 | 21 | 19 | F13B Coagulation factor XIII B chain precursor             | CFDHHFLEGSR                    | 3 | 511.8957 | 2.276 | 0.161 |

|    |             |   |      |      |      |    |    |                                                  |                                          |   |           |       |       |
|----|-------------|---|------|------|------|----|----|--------------------------------------------------|------------------------------------------|---|-----------|-------|-------|
| 10 | IPI00007240 | 1 | 14.7 | 0.96 | 0.07 | 21 | 19 | F13B Coagulation factor XIII B chain precursor   | n[145]IQTHSTTYR                          | 2 | 625.8341  | 2.323 | 0.167 |
| 10 | IPI00007240 | 1 | 14.7 | 0.96 | 0.07 | 21 | 19 | F13B Coagulation factor XIII B chain precursor   | n[145]IQTHSTTYR                          | 3 | 417.5585  | 1.855 | 0.226 |
| 10 | IPI00007240 | 1 | 14.7 | 0.96 | 0.07 | 21 | 19 | F13B Coagulation factor XIII B chain precursor   | CNEYLLR                                  | 2 | 630.2992  | 2.155 | 0.069 |
| 10 | IPI00007240 | 1 | 14.7 | 0.96 | 0.07 | 21 | 19 | F13B Coagulation factor XIII B chain precursor   | n[145]CFDHHFLEGSR                        | 3 | 513.2314  | 1.658 | 0.109 |
| 10 | IPI00007240 | 1 | 14.7 | 0.96 | 0.07 | 21 | 19 | F13B Coagulation factor XIII B chain precursor   | EM[147]K                                 | 1 | 703.3808  | 1.121 | 0.072 |
| 11 | IPI00008556 | 1 | 6.7  | 0.48 | 0.22 | 3  | 3  | F11 Isoform 1 of Coagulation factor XI precursor | n[145]GGISGYTLR                          | 2 | 534.3019  | 3.265 | 0.252 |
| 11 | IPI00008556 | 1 | 6.7  | 0.48 | 0.22 | 3  | 3  | F11 Isoform 1 of Coagulation factor XI precursor | QFPSLEHR                                 | 2 | 577.3093  | 2.464 | 0.098 |
| 11 | IPI00008556 | 1 | 6.7  | 0.48 | 0.22 | 3  | 3  | F11 Isoform 1 of Coagulation factor XI precursor | EIIHDQYK                                 | 3 | 480.2733  | 3.268 | 0.161 |
| 11 | IPI00008556 | 1 | 6.7  | 0.48 | 0.22 | 3  | 3  | F11 Isoform 1 of Coagulation factor XI precursor | n[145]DIALK[272]                         | 2 | 480.8203  | 1.803 | 1     |
| 11 | IPI00008556 | 1 | 6.7  | 0.48 | 0.22 | 3  | 3  | F11 Isoform 1 of Coagulation factor XI precursor | n[145]CQFFTY                             | 1 | 998.4233  | 1.511 | 0.238 |
| 11 | IPI00008556 | 1 | 6.7  | 0.48 | 0.22 | 3  | 3  | F11 Isoform 1 of Coagulation factor XI precursor | SVAK                                     | 2 | 342.7238  | 0.841 | 0.121 |
| 12 | IPI00009028 | 1 | 29.2 | 1.08 | 0.19 | 13 | 12 | CLEC3B Tetranectin precursor                     | EQQALQTVCLK                              | 2 | 793.9233  | 5.152 | 0.437 |
| 12 | IPI00009028 | 1 | 29.2 | 1.08 | 0.19 | 13 | 12 | CLEC3B Tetranectin precursor                     | n[145]EQQALQTVCLK[272]                   | 2 | 797.9304  | 4.53  | 0.378 |
| 12 | IPI00009028 | 1 | 29.2 | 1.08 | 0.19 | 13 | 12 | CLEC3B Tetranectin precursor                     | n[145]TFHEASEDCISR                       | 3 | 528.9016  | 4.097 | 0.422 |
| 12 | IPI00009028 | 1 | 29.2 | 1.08 | 0.19 | 13 | 12 | CLEC3B Tetranectin precursor                     | n[145]SRLDTLAQEVALLK[272]                | 3 | 615.7065  | 4.04  | 0.384 |
| 12 | IPI00009028 | 1 | 29.2 | 1.08 | 0.19 | 13 | 12 | CLEC3B Tetranectin precursor                     | n[145]LDTLAQEVALLK[272]                  | 2 | 801.4895  | 4.139 | 0.302 |
| 12 | IPI00009028 | 1 | 29.2 | 1.08 | 0.19 | 13 | 12 | CLEC3B Tetranectin precursor                     | SRLDTLAQEVALLK                           | 3 | 613.0351  | 3.464 | 0.296 |
| 12 | IPI00009028 | 1 | 29.2 | 1.08 | 0.19 | 13 | 12 | CLEC3B Tetranectin precursor                     | n[145]CFLAFTQTK[272]                     | 2 | 696.8666  | 3.449 | 0.254 |
| 12 | IPI00009028 | 1 | 29.2 | 1.08 | 0.19 | 13 | 12 | CLEC3B Tetranectin precursor                     | CFLAFTQTK                                | 2 | 692.8595  | 3.532 | 0.262 |
| 12 | IPI00009028 | 1 | 29.2 | 1.08 | 0.19 | 13 | 12 | CLEC3B Tetranectin precursor                     | LDTLAQEVALLK                             | 2 | 797.4824  | 3.314 | 0.254 |
| 12 | IPI00009028 | 1 | 29.2 | 1.08 | 0.19 | 13 | 12 | CLEC3B Tetranectin precursor                     | KDVVNTK                                  | 2 | 612.3772  | 2.602 | 0.214 |
| 12 | IPI00009028 | 1 | 29.2 | 1.08 | 0.19 | 13 | 12 | CLEC3B Tetranectin precursor                     | KIVNAK                                   | 3 | 364.9133  | 2.582 | 0.08  |
| 12 | IPI00009028 | 1 | 29.2 | 1.08 | 0.19 | 13 | 12 | CLEC3B Tetranectin precursor                     | KIVNAK                                   | 2 | 546.8663  | 2.146 | 0.057 |
| 13 | IPI00009920 | 1 | 26   | 0.7  | 0.19 | 54 | 43 | C6 Complement component C6 precursor             | DLHLSDVFLK                               | 2 | 733.922   | 4.234 | 0.494 |
| 13 | IPI00009920 | 1 | 26   | 0.7  | 0.19 | 54 | 43 | C6 Complement component C6 precursor             | HEGSFIQGAEK                              | 2 | 741.8887  | 4.098 | 0.429 |
| 13 | IPI00009920 | 1 | 26   | 0.7  | 0.19 | 54 | 43 | C6 Complement component C6 precursor             | YYQENFCEQICSK                            | 2 | 1013.9301 | 4.17  | 0.549 |
| 13 | IPI00009920 | 1 | 26   | 0.7  | 0.19 | 54 | 43 | C6 Complement component C6 precursor             | n[145]DLHLSDVFLK[272]                    | 2 | 737.9291  | 4.211 | 0.414 |
| 13 | IPI00009920 | 1 | 26   | 0.7  | 0.19 | 54 | 43 | C6 Complement component C6 precursor             | n[145]ENPAVIDFELAPIVDLVR                 | 2 | 1077.6    | 5.652 | 0.409 |
| 13 | IPI00009920 | 1 | 26   | 0.7  | 0.19 | 54 | 43 | C6 Complement component C6 precursor             | n[145]HEGSFIQGAEK[272]                   | 2 | 745.8958  | 4.347 | 0.466 |
| 13 | IPI00009920 | 1 | 26   | 0.7  | 0.19 | 54 | 43 | C6 Complement component C6 precursor             | n[145]SENIHNNSAFK[272]                   | 2 | 774.9041  | 4.999 | 0.412 |
| 13 | IPI00009920 | 1 | 26   | 0.7  | 0.19 | 54 | 43 | C6 Complement component C6 precursor             | n[145]YYQENFCEQICSK[272]                 | 2 | 1017.9372 | 4.316 | 0.449 |
| 13 | IPI00009920 | 1 | 26   | 0.7  | 0.19 | 54 | 43 | C6 Complement component C6 precursor             | DLHLSDVFLK                               | 3 | 489.6171  | 3.611 | 0.331 |
| 13 | IPI00009920 | 1 | 26   | 0.7  | 0.19 | 54 | 43 | C6 Complement component C6 precursor             | n[145]ALNHLPLEYNSALYSR                   | 3 | 669.0256  | 4.9   | 0.401 |
| 13 | IPI00009920 | 1 | 26   | 0.7  | 0.19 | 54 | 43 | C6 Complement component C6 precursor             | n[145]DLHLSDVFLK[272]                    | 3 | 492.2885  | 3.882 | 0.296 |
| 13 | IPI00009920 | 1 | 26   | 0.7  | 0.19 | 54 | 43 | C6 Complement component C6 precursor             | n[145]VPANLENVGFVQTAEDDLK[272]TDFYK[272] | 3 | 1092.233  | 5.806 | 0.559 |
| 13 | IPI00009920 | 1 | 26   | 0.7  | 0.19 | 54 | 43 | C6 Complement component C6 precursor             | HEGSFIQGAEK                              | 3 | 494.9282  | 3.895 | 0.226 |
| 13 | IPI00009920 | 1 | 26   | 0.7  | 0.19 | 54 | 43 | C6 Complement component C6 precursor             | SENIHNNSAFK                              | 3 | 514.2671  | 2.983 | 0.325 |
| 13 | IPI00009920 | 1 | 26   | 0.7  | 0.19 | 54 | 43 | C6 Complement component C6 precursor             | n[145]AK[272]DLHLSDVFLK[272]             | 3 | 606.6999  | 3.397 | 0.319 |
| 13 | IPI00009920 | 1 | 26   | 0.7  | 0.19 | 54 | 43 | C6 Complement component C6 precursor             | n[145]LSEK[272]HEGSFIQGAEK[272]          | 3 | 698.0515  | 3.777 | 0.372 |
| 13 | IPI00009920 | 1 | 26   | 0.7  | 0.19 | 54 | 43 | C6 Complement component C6 precursor             | n[145]SENIHNNSAFK[272]                   | 3 | 516.9385  | 2.729 | 0.367 |
| 13 | IPI00009920 | 1 | 26   | 0.7  | 0.19 | 54 | 43 | C6 Complement component C6 precursor             | n[145]CLNNQQLHFLHIGSCQDGR                | 4 | 605.5307  | 3.913 | 0.39  |
| 13 | IPI00009920 | 1 | 26   | 0.7  | 0.19 | 54 | 43 | C6 Complement component C6 precursor             | n[145]ALNHLPLEYNSALYSR                   | 2 | 1003.0348 | 3.729 | 0.379 |
| 13 | IPI00009920 | 1 | 26   | 0.7  | 0.19 | 54 | 43 | C6 Complement component C6 precursor             | n[145]TLNICEVGTIR                        | 2 | 704.8741  | 3.751 | 0.337 |
| 13 | IPI00009920 | 1 | 26   | 0.7  | 0.19 | 54 | 43 | C6 Complement component C6 precursor             | NSGLTEEEAK                               | 2 | 679.3516  | 3.814 | 0.382 |
| 13 | IPI00009920 | 1 | 26   | 0.7  | 0.19 | 54 | 43 | C6 Complement component C6 precursor             | n[145]ECNNPAPQR                          | 2 | 609.7774  | 2.691 | 0.29  |
| 13 | IPI00009920 | 1 | 26   | 0.7  | 0.19 | 54 | 43 | C6 Complement component C6 precursor             | n[145]GFVVAGPSR                          | 2 | 517.2992  | 3.228 | 0.287 |
| 13 | IPI00009920 | 1 | 26   | 0.7  | 0.19 | 54 | 43 | C6 Complement component C6 precursor             | n[145]NSGLTEEEAK[272]                    | 2 | 683.3587  | 2.814 | 0.359 |
| 13 | IPI00009920 | 1 | 26   | 0.7  | 0.19 | 54 | 43 | C6 Complement component C6 precursor             | n[145]QAIQASHK[272]K[272]                | 3 | 481.6317  | 2.91  | 0.197 |

|    |             |   |      |      |      |    |    |                                                   |                                             |   |           |       |       |
|----|-------------|---|------|------|------|----|----|---------------------------------------------------|---------------------------------------------|---|-----------|-------|-------|
| 13 | IPI00009920 | 1 | 26   | 0.7  | 0.19 | 54 | 43 | C6 Complement component C6 precursor              | IEEADCK                                     | 2 | 567.2701  | 2.4   | 0.291 |
| 13 | IPI00009920 | 1 | 26   | 0.7  | 0.19 | 54 | 43 | C6 Complement component C6 precursor              | n[145]RSENINHNSAFK[272]                     | 3 | 568.9722  | 2.665 | 0.176 |
| 13 | IPI00009920 | 1 | 26   | 0.7  | 0.19 | 54 | 43 | C6 Complement component C6 precursor              | n[145]GEVLDSNFTGGICK[272]                   | 2 | 887.4413  | 2.486 | 0.254 |
| 13 | IPI00009920 | 1 | 26   | 0.7  | 0.19 | 54 | 43 | C6 Complement component C6 precursor              | KM[147]EILHPGK                              | 2 | 744.9397  | 2.213 | 0.218 |
| 13 | IPI00009920 | 1 | 26   | 0.7  | 0.19 | 54 | 43 | C6 Complement component C6 precursor              | NIPCAVTK                                    | 2 | 586.32    | 2.138 | 0.186 |
| 13 | IPI00009920 | 1 | 26   | 0.7  | 0.19 | 54 | 43 | C6 Complement component C6 precursor              | n[145]ALQEYAAK[272]                         | 2 | 591.3421  | 2.897 | 0.054 |
| 13 | IPI00009920 | 1 | 26   | 0.7  | 0.19 | 54 | 43 | C6 Complement component C6 precursor              | ALQEYAAK                                    | 2 | 587.335   | 2.578 | 0.071 |
| 13 | IPI00009920 | 1 | 26   | 0.7  | 0.19 | 54 | 43 | C6 Complement component C6 precursor              | QAIQASHKK                                   | 3 | 477.6246  | 1.886 | 0.19  |
| 13 | IPI00009920 | 1 | 26   | 0.7  | 0.19 | 54 | 43 | C6 Complement component C6 precursor              | AKDLHLSDEVFLK                               | 3 | 602.6928  | 3.507 | 0.132 |
| 13 | IPI00009920 | 1 | 26   | 0.7  | 0.19 | 54 | 43 | C6 Complement component C6 precursor              | n[145]HEGSFIQGAEK[272]                      | 3 | 497.5996  | 2.954 | 0.081 |
| 13 | IPI00009920 | 1 | 26   | 0.7  | 0.19 | 54 | 43 | C6 Complement component C6 precursor              | n[145]TFSEWLESVK[272]                       | 2 | 757.4107  | 2.535 | 0.277 |
| 13 | IPI00009920 | 1 | 26   | 0.7  | 0.19 | 54 | 43 | C6 Complement component C6 precursor              | n[145]FLAEK[272]                            | 2 | 448.2782  | 1.72  | 0.009 |
| 13 | IPI00009920 | 1 | 26   | 0.7  | 0.19 | 54 | 43 | C6 Complement component C6 precursor              | n[145]ENPAVIDFELAPIVDLVR                    | 3 | 718.7357  | 2.892 | 0.109 |
| 13 | IPI00009920 | 1 | 26   | 0.7  | 0.19 | 54 | 43 | C6 Complement component C6 precursor              | KM[147]EILHPGK                              | 4 | 372.9735  | 1.877 | 0.018 |
| 13 | IPI00009920 | 1 | 26   | 0.7  | 0.19 | 54 | 43 | C6 Complement component C6 precursor              | n[145]IEEADCK[272]                          | 2 | 571.2772  | 2.243 | 0.216 |
| 13 | IPI00009920 | 1 | 26   | 0.7  | 0.19 | 54 | 43 | C6 Complement component C6 precursor              | KALQEYAAK                                   | 3 | 481.2891  | 1.659 | 0.022 |
| 13 | IPI00009920 | 1 | 26   | 0.7  | 0.19 | 54 | 43 | C6 Complement component C6 precursor              | M[147]EILHPGK                               | 3 | 407.5655  | 1.668 | 0.003 |
| 13 | IPI00009920 | 1 | 26   | 0.7  | 0.19 | 54 | 43 | C6 Complement component C6 precursor              | n[145]CLNNQQLH                              | 2 | 580.2771  | 1.81  | 0.17  |
| 13 | IPI00009920 | 1 | 26   | 0.7  | 0.19 | 54 | 43 | C6 Complement component C6 precursor              | SVK[272]                                    | 1 | 617.4104  | 0.88  | 0.378 |
| 13 | IPI00009920 | 1 | 26   | 0.7  | 0.19 | 54 | 43 | C6 Complement component C6 precursor              | EM[147]K                                    | 1 | 703.3808  | 1.121 | 0.072 |
| 14 | IPI00010295 | 1 | 20.1 | 0.73 | 0.08 | 18 | 12 | CPN1 Carboxypeptidase N catalytic chain precursor | EALIQFLEQVHQGIK                             | 3 | 678.3896  | 4.126 | 0.359 |
| 14 | IPI00010295 | 1 | 20.1 | 0.73 | 0.08 | 18 | 12 | CPN1 Carboxypeptidase N catalytic chain precursor | n[145]EALIQFLEQVHQGIK[272]                  | 3 | 681.061   | 5.373 | 0.494 |
| 14 | IPI00010295 | 1 | 20.1 | 0.73 | 0.08 | 18 | 12 | CPN1 Carboxypeptidase N catalytic chain precursor | n[145]IHILPSM[147]NPDGYEVAAAQGPNK[272]PGYLV | 3 | 1123.5936 | 4.63  | 0.469 |
| 14 | IPI00010295 | 1 | 20.1 | 0.73 | 0.08 | 18 | 12 | CPN1 Carboxypeptidase N catalytic chain precursor | n[145]IHILPSM[147]NPDGYEVAAAQGPNK[272]PGYLV | 4 | 842.9471  | 4.7   | 0.381 |
| 14 | IPI00010295 | 1 | 20.1 | 0.73 | 0.08 | 18 | 12 | CPN1 Carboxypeptidase N catalytic chain precursor | n[145]YVGNMHGNEALGR                         | 3 | 521.2602  | 3.553 | 0.383 |
| 14 | IPI00010295 | 1 | 20.1 | 0.73 | 0.08 | 18 | 12 | CPN1 Carboxypeptidase N catalytic chain precursor | n[145]YVGNM[147]HGNEALGR                    | 3 | 526.5919  | 2.084 | 0.437 |
| 14 | IPI00010295 | 1 | 20.1 | 0.73 | 0.08 | 18 | 12 | CPN1 Carboxypeptidase N catalytic chain precursor | IHILPSM[147]NPDGYEVAAAQGPNKPGYLVGR          | 4 | 840.9435  | 3.511 | 0.213 |
| 14 | IPI00010295 | 1 | 20.1 | 0.73 | 0.08 | 18 | 12 | CPN1 Carboxypeptidase N catalytic chain precursor | n[145]IVQLIQDTR                             | 2 | 615.3704  | 2.994 | 0.316 |
| 14 | IPI00010295 | 1 | 20.1 | 0.73 | 0.08 | 18 | 12 | CPN1 Carboxypeptidase N catalytic chain precursor | n[145]VQNECPGTR                             | 2 | 653.8218  | 2.757 | 0.282 |
| 14 | IPI00010295 | 1 | 20.1 | 0.73 | 0.08 | 18 | 12 | CPN1 Carboxypeptidase N catalytic chain precursor | n[145]TASTPTPDDK[272]                       | 2 | 660.8479  | 2.902 | 0.187 |
| 14 | IPI00010295 | 1 | 20.1 | 0.73 | 0.08 | 18 | 12 | CPN1 Carboxypeptidase N catalytic chain precursor | TASTPTPDDK                                  | 2 | 656.8408  | 2.108 | 0.109 |
| 14 | IPI00010295 | 1 | 20.1 | 0.73 | 0.08 | 18 | 12 | CPN1 Carboxypeptidase N catalytic chain precursor | n[145]VYSIGR                                | 2 | 419.7488  | 1.533 | 0.016 |
| 15 | IPI00011252 | 1 | 24.7 | 0.56 | 0.21 | 23 | 21 | C8A Complement component C8 alpha chain precursor | AIDEDCSQYEPIGSQK                            | 2 | 1103.5114 | 4.78  | 0.542 |
| 15 | IPI00011252 | 1 | 24.7 | 0.56 | 0.21 | 23 | 21 | C8A Complement component C8 alpha chain precursor | INVGGGLSGDHCK                               | 2 | 791.8951  | 4.267 | 0.545 |
| 15 | IPI00011252 | 1 | 24.7 | 0.56 | 0.21 | 23 | 21 | C8A Complement component C8 alpha chain precursor | n[145]AIDEDCSQYEPIGSQK[272]                 | 2 | 1107.5185 | 4.919 | 0.605 |
| 15 | IPI00011252 | 1 | 24.7 | 0.56 | 0.21 | 23 | 21 | C8A Complement component C8 alpha chain precursor | n[145]ALDQYLMEFNACR                         | 2 | 882.4054  | 4.425 | 0.511 |
| 15 | IPI00011252 | 1 | 24.7 | 0.56 | 0.21 | 23 | 21 | C8A Complement component C8 alpha chain precursor | n[145]INVGGGLSGDHCK[272]                    | 2 | 795.9022  | 3.689 | 0.511 |
| 15 | IPI00011252 | 1 | 24.7 | 0.56 | 0.21 | 23 | 21 | C8A Complement component C8 alpha chain precursor | INVGGGLSGDHCK                               | 3 | 528.2658  | 4.191 | 0.402 |
| 15 | IPI00011252 | 1 | 24.7 | 0.56 | 0.21 | 23 | 21 | C8A Complement component C8 alpha chain precursor | n[145]INVGGGLSGDHCK[272]                    | 3 | 530.9372  | 5.132 | 0.511 |
| 15 | IPI00011252 | 1 | 24.7 | 0.56 | 0.21 | 23 | 21 | C8A Complement component C8 alpha chain precursor | n[145]YNPVVIDFEMQPIHEVLR                    | 3 | 781.7478  | 5.587 | 0.509 |
| 15 | IPI00011252 | 1 | 24.7 | 0.56 | 0.21 | 23 | 21 | C8A Complement component C8 alpha chain precursor | n[145]YNPVVIDFEM[147]QPIHEVLR               | 3 | 787.0794  | 6.193 | 0.541 |
| 15 | IPI00011252 | 1 | 24.7 | 0.56 | 0.21 | 23 | 21 | C8A Complement component C8 alpha chain precursor | HTSLGPLEAK                                  | 2 | 666.8854  | 3.59  | 0.411 |
| 15 | IPI00011252 | 1 | 24.7 | 0.56 | 0.21 | 23 | 21 | C8A Complement component C8 alpha chain precursor | n[145]HTSLGPLEAK[272]                       | 2 | 670.8925  | 3.337 | 0.362 |
| 15 | IPI00011252 | 1 | 24.7 | 0.56 | 0.21 | 23 | 21 | C8A Complement component C8 alpha chain precursor | n[145]AMAVEDIISR                            | 2 | 624.8406  | 2.86  | 0.308 |
| 15 | IPI00011252 | 1 | 24.7 | 0.56 | 0.21 | 23 | 21 | C8A Complement component C8 alpha chain precursor | KPYNFLK                                     | 3 | 443.9396  | 2.368 | 0.206 |
| 15 | IPI00011252 | 1 | 24.7 | 0.56 | 0.21 | 23 | 21 | C8A Complement component C8 alpha chain precursor | n[145]STITYR                                | 2 | 442.7516  | 2.224 | 0.154 |
| 15 | IPI00011252 | 1 | 24.7 | 0.56 | 0.21 | 23 | 21 | C8A Complement component C8 alpha chain precursor | LYYGDDEK                                    | 2 | 641.8194  | 2.752 | 0.123 |
| 15 | IPI00011252 | 1 | 24.7 | 0.56 | 0.21 | 23 | 21 | C8A Complement component C8 alpha chain precursor | n[145]YDSTCER                               | 2 | 532.2189  | 1.766 | 0.201 |

|    |             |   |      |      |      |     |    |                                                   |                                      |   |           |       |       |
|----|-------------|---|------|------|------|-----|----|---------------------------------------------------|--------------------------------------|---|-----------|-------|-------|
| 15 | IPI00011252 | 1 | 24.7 | 0.56 | 0.21 | 23  | 21 | C8A Complement component C8 alpha chain precursor | KFGGGK                               | 3 | 338.5467  | 1.807 | 0.139 |
| 15 | IPI00011252 | 1 | 24.7 | 0.56 | 0.21 | 23  | 21 | C8A Complement component C8 alpha chain precursor | n[145]DITTCFGGSLGIQYEDKINVGGGLSGDHCK | 5 | 720.9473  | 2.521 | 0.037 |
| 15 | IPI00011252 | 1 | 24.7 | 0.56 | 0.21 | 23  | 21 | C8A Complement component C8 alpha chain precursor | n[145]AM[147]AVEDIISR                | 2 | 632.838   | 2.073 | 0.053 |
| 15 | IPI00011252 | 1 | 24.7 | 0.56 | 0.21 | 23  | 21 | C8A Complement component C8 alpha chain precursor | KVQTQAC                              | 2 | 552.2887  | 1.203 | 0.192 |
| 15 | IPI00011252 | 1 | 24.7 | 0.56 | 0.21 | 23  | 21 | C8A Complement component C8 alpha chain precursor | n[145]FIFTR                          | 2 | 414.2484  | 1.442 | 0.099 |
| 16 | IPI00011261 | 1 | 41.6 | 0.78 | 0.04 | 16  | 11 | C8G Complement component C8 gamma chain precursor | n[145]SLPVSDSVLSGFQR                 | 2 | 882.9661  | 4.493 | 0.474 |
| 16 | IPI00011261 | 1 | 41.6 | 0.78 | 0.04 | 16  | 11 | C8G Complement component C8 gamma chain precursor | n[145]AEATTLHVAPQGTAM[147]AVSTFR     | 3 | 773.7343  | 4.599 | 0.433 |
| 16 | IPI00011261 | 1 | 41.6 | 0.78 | 0.04 | 16  | 11 | C8G Complement component C8 gamma chain precursor | VQEALHTEDQIFYFPK                     | 3 | 749.0599  | 3.76  | 0.345 |
| 16 | IPI00011261 | 1 | 41.6 | 0.78 | 0.04 | 16  | 11 | C8G Complement component C8 gamma chain precursor | n[145]FLQEQQGHR                      | 2 | 579.8105  | 2.707 | 0.286 |
| 16 | IPI00011261 | 1 | 41.6 | 0.78 | 0.04 | 16  | 11 | C8G Complement component C8 gamma chain precursor | n[145]FLQEQQGHR                      | 3 | 386.8761  | 3.312 | 0.151 |
| 16 | IPI00011261 | 1 | 41.6 | 0.78 | 0.04 | 16  | 11 | C8G Complement component C8 gamma chain precursor | n[145]QLYGDGTGVLGR                   | 2 | 661.8629  | 3.441 | 0.272 |
| 16 | IPI00011261 | 1 | 41.6 | 0.78 | 0.04 | 16  | 11 | C8G Complement component C8 gamma chain precursor | n[145]AGQLSVK[272]                   | 2 | 495.813   | 2.803 | 0.206 |
| 16 | IPI00011261 | 1 | 41.6 | 0.78 | 0.04 | 16  | 11 | C8G Complement component C8 gamma chain precursor | AGQLSVK                              | 2 | 491.8059  | 2.498 | 0.189 |
| 16 | IPI00011261 | 1 | 41.6 | 0.78 | 0.04 | 16  | 11 | C8G Complement component C8 gamma chain precursor | n[145]FLLQAR                         | 2 | 446.2803  | 2.19  | 0.063 |
| 16 | IPI00011261 | 1 | 41.6 | 0.78 | 0.04 | 16  | 11 | C8G Complement component C8 gamma chain precursor | n[145]VQEALHTEDQIFYFPK[272]          | 3 | 751.7313  | 2.73  | 0.064 |
| 16 | IPI00011261 | 1 | 41.6 | 0.78 | 0.04 | 16  | 11 | C8G Complement component C8 gamma chain precursor | SLPVSDSVLSGFQR                       | 2 | 880.9625  | 1.789 | 0.019 |
| 16 | IPI00011261 | 1 | 41.6 | 0.78 | 0.04 | 16  | 11 | C8G Complement component C8 gamma chain precursor | SVK[272]                             | 1 | 617.4104  | 0.88  | 0.378 |
| 17 | IPI00012792 | 1 | 4.5  | 0.98 | 0.08 | 3   | 3  | CDH5 Cadherin-5 precursor                         | n[145]ELDSTGTPTGK[272]               | 2 | 697.3743  | 3.478 | 0.294 |
| 17 | IPI00012792 | 1 | 4.5  | 0.98 | 0.08 | 3   | 3  | CDH5 Cadherin-5 precursor                         | KGDIYNEK                             | 2 | 693.8907  | 2.091 | 0.142 |
| 17 | IPI00012792 | 1 | 4.5  | 0.98 | 0.08 | 3   | 3  | CDH5 Cadherin-5 precursor                         | n[145]VHFLPVVISDNGM[147]PSR          | 3 | 643.3442  | 2.225 | 0.11  |
| 18 | IPI00017601 | 1 | 48.8 | 0.73 | 0.08 | 265 | ## | CP Ceruloplasmin precursor                        | EYTDASFTNR                           | 1 | 1343.6227 | 2.585 | 0.425 |
| 18 | IPI00017601 | 1 | 48.8 | 0.73 | 0.08 | 265 | ## | CP Ceruloplasmin precursor                        | n[145]EYTDASFTNR                     | 1 | 1347.6298 | 2.886 | 0.373 |
| 18 | IPI00017601 | 1 | 48.8 | 0.73 | 0.08 | 265 | ## | CP Ceruloplasmin precursor                        | AGLQAFFVQECNK                        | 2 | 954.9766  | 5.013 | 0.516 |
| 18 | IPI00017601 | 1 | 48.8 | 0.73 | 0.08 | 265 | ## | CP Ceruloplasmin precursor                        | DIASGLIGPLICK                        | 2 | 870.0016  | 4.769 | 0.492 |
| 18 | IPI00017601 | 1 | 48.8 | 0.73 | 0.08 | 265 | ## | CP Ceruloplasmin precursor                        | DIFTGLIGPMK                          | 2 | 736.4207  | 4.43  | 0.413 |
| 18 | IPI00017601 | 1 | 48.8 | 0.73 | 0.08 | 265 | ## | CP Ceruloplasmin precursor                        | DLYSGLIGPLIVCR                       | 2 | 852.9624  | 3.337 | 0.49  |
| 18 | IPI00017601 | 1 | 48.8 | 0.73 | 0.08 | 265 | ## | CP Ceruloplasmin precursor                        | EVGPTNADPVCLAK                       | 2 | 870.4446  | 3.919 | 0.435 |
| 18 | IPI00017601 | 1 | 48.8 | 0.73 | 0.08 | 265 | ## | CP Ceruloplasmin precursor                        | MYYSAVDPTK                           | 2 | 727.8711  | 3.877 | 0.443 |
| 18 | IPI00017601 | 1 | 48.8 | 0.73 | 0.08 | 265 | ## | CP Ceruloplasmin precursor                        | VDKDNEDFQESNR                        | 2 | 938.4452  | 4.66  | 0.522 |
| 18 | IPI00017601 | 1 | 48.8 | 0.73 | 0.08 | 265 | ## | CP Ceruloplasmin precursor                        | VNKDDEEFIESNK                        | 2 | 994.0102  | 5.162 | 0.467 |
| 18 | IPI00017601 | 1 | 48.8 | 0.73 | 0.08 | 265 | ## | CP Ceruloplasmin precursor                        | n[145]AGLQAFFVQECNK[272]             | 2 | 958.9837  | 5.545 | 0.541 |
| 18 | IPI00017601 | 1 | 48.8 | 0.73 | 0.08 | 265 | ## | CP Ceruloplasmin precursor                        | n[145]ALYLQYTDETR                    | 2 | 832.4261  | 3.721 | 0.512 |
| 18 | IPI00017601 | 1 | 48.8 | 0.73 | 0.08 | 265 | ## | CP Ceruloplasmin precursor                        | n[145]DIASGLIGPLICK[272]             | 2 | 874.0087  | 4.485 | 0.49  |
| 18 | IPI00017601 | 1 | 48.8 | 0.73 | 0.08 | 265 | ## | CP Ceruloplasmin precursor                        | n[145]DIFTGLIGPMK[272]               | 2 | 740.4278  | 4.336 | 0.409 |
| 18 | IPI00017601 | 1 | 48.8 | 0.73 | 0.08 | 265 | ## | CP Ceruloplasmin precursor                        | n[145]DLYSGLIGPLIVCR                 | 2 | 854.966   | 3.029 | 0.355 |
| 18 | IPI00017601 | 1 | 48.8 | 0.73 | 0.08 | 265 | ## | CP Ceruloplasmin precursor                        | n[145]MYYSAVDPTK[272]                | 2 | 731.8782  | 4.224 | 0.465 |
| 18 | IPI00017601 | 1 | 48.8 | 0.73 | 0.08 | 265 | ## | CP Ceruloplasmin precursor                        | n[145]NNEGTYYSPNYPQSR                | 2 | 1024.465  | 5.688 | 0.516 |
| 18 | IPI00017601 | 1 | 48.8 | 0.73 | 0.08 | 265 | ## | CP Ceruloplasmin precursor                        | n[145]RDTANLFPQTSLLH                 | 2 | 929.5006  | 3.92  | 0.46  |
| 18 | IPI00017601 | 1 | 48.8 | 0.73 | 0.08 | 265 | ## | CP Ceruloplasmin precursor                        | n[145]VDK[272]DNEDFQESNR             | 2 | 942.4523  | 3.751 | 0.406 |
| 18 | IPI00017601 | 1 | 48.8 | 0.73 | 0.08 | 265 | ## | CP Ceruloplasmin precursor                        | n[145]VNK[272]DDEEFIESNK[272]        | 2 | 1000.0209 | 4.14  | 0.332 |
| 18 | IPI00017601 | 1 | 48.8 | 0.73 | 0.08 | 265 | ## | CP Ceruloplasmin precursor                        | AEEEHLGILGPQLHADVGDK                 | 3 | 803.4238  | 5.476 | 0.478 |
| 18 | IPI00017601 | 1 | 48.8 | 0.73 | 0.08 | 265 | ## | CP Ceruloplasmin precursor                        | AGLQAFFVQECNK                        | 3 | 636.9868  | 3.863 | 0.358 |
| 18 | IPI00017601 | 1 | 48.8 | 0.73 | 0.08 | 265 | ## | CP Ceruloplasmin precursor                        | KAEEEHLGILGPQLHADVGDK                | 3 | 892.8205  | 4.517 | 0.442 |
| 18 | IPI00017601 | 1 | 48.8 | 0.73 | 0.08 | 265 | ## | CP Ceruloplasmin precursor                        | KALYLQYTDETR                         | 3 | 643.3474  | 3.777 | 0.396 |
| 18 | IPI00017601 | 1 | 48.8 | 0.73 | 0.08 | 265 | ## | CP Ceruloplasmin precursor                        | KLISVDTEHSNIYLNQNPDR                 | 3 | 860.4574  | 6.174 | 0.526 |
| 18 | IPI00017601 | 1 | 48.8 | 0.73 | 0.08 | 265 | ## | CP Ceruloplasmin precursor                        | MFTTAPDQVDKEDEDFQESNK                | 3 | 965.4553  | 5.166 | 0.49  |
| 18 | IPI00017601 | 1 | 48.8 | 0.73 | 0.08 | 265 | ## | CP Ceruloplasmin precursor                        | M[147]FTTAPDQVDKEDEDFQESNK           | 3 | 970.7869  | 5.616 | 0.516 |
| 18 | IPI00017601 | 1 | 48.8 | 0.73 | 0.08 | 265 | ## | CP Ceruloplasmin precursor                        | NLASRPYTFHSHGITYYK                   | 3 | 812.4255  | 4.636 | 0.472 |

|    |             |   |      |      |      |     |    |                            |                                       |   |           |       |       |
|----|-------------|---|------|------|------|-----|----|----------------------------|---------------------------------------|---|-----------|-------|-------|
| 18 | IPI00017601 | 1 | 48.8 | 0.73 | 0.08 | 265 | ## | CP Ceruloplasmin precursor | SVPPSASHVAPTETFTYEWTVPK               | 3 | 937.8166  | 6.12  | 0.662 |
| 18 | IPI00017601 | 1 | 48.8 | 0.73 | 0.08 | 265 | ## | CP Ceruloplasmin precursor | TYCSEPEKVDKDNEDFQESNR                 | 3 | 1000.4552 | 4.419 | 0.491 |
| 18 | IPI00017601 | 1 | 48.8 | 0.73 | 0.08 | 265 | ## | CP Ceruloplasmin precursor | VNKDDEEFIESNK                         | 3 | 663.0092  | 4.565 | 0.45  |
| 18 | IPI00017601 | 1 | 48.8 | 0.73 | 0.08 | 265 | ## | CP Ceruloplasmin precursor | n[145]AEEHHLGILGPQLHADVGDK[272]       | 3 | 806.0952  | 6.769 | 0.495 |
| 18 | IPI00017601 | 1 | 48.8 | 0.73 | 0.08 | 265 | ## | CP Ceruloplasmin precursor | n[145]AGLQAFFVQECNK[272]              | 3 | 639.6582  | 3.28  | 0.395 |
| 18 | IPI00017601 | 1 | 48.8 | 0.73 | 0.08 | 265 | ## | CP Ceruloplasmin precursor | n[145]DIASGLIGLIICK[272]              | 3 | 583.0082  | 2.904 | 0.173 |
| 18 | IPI00017601 | 1 | 48.8 | 0.73 | 0.08 | 265 | ## | CP Ceruloplasmin precursor | n[145]MFTTAPDQVDK[272]EDEDQESNK[272]  | 3 | 969.4624  | 5.008 | 0.526 |
| 18 | IPI00017601 | 1 | 48.8 | 0.73 | 0.08 | 265 | ## | CP Ceruloplasmin precursor | n[145]NLASRPYTFHSHGITYYK[272]         | 3 | 815.0969  | 4.896 | 0.459 |
| 18 | IPI00017601 | 1 | 48.8 | 0.73 | 0.08 | 265 | ## | CP Ceruloplasmin precursor | n[145]SVPPSASHVAPTETFTYEWTVPK[272]    | 3 | 940.488   | 6.565 | 0.634 |
| 18 | IPI00017601 | 1 | 48.8 | 0.73 | 0.08 | 265 | ## | CP Ceruloplasmin precursor | n[145]TYCSEPEK[272]VDK[272]DNEDFQESNR | 3 | 1004.4623 | 6.265 | 0.495 |
| 18 | IPI00017601 | 1 | 48.8 | 0.73 | 0.08 | 265 | ## | CP Ceruloplasmin precursor | n[145]VVK[272]DDEEFIESNK[272]         | 3 | 667.0163  | 3.676 | 0.397 |
| 18 | IPI00017601 | 1 | 48.8 | 0.73 | 0.08 | 265 | ## | CP Ceruloplasmin precursor | n[145]VTFHNK[272]GAYPLSIEPIGVR        | 3 | 796.121   | 4.715 | 0.564 |
| 18 | IPI00017601 | 1 | 48.8 | 0.73 | 0.08 | 265 | ## | CP Ceruloplasmin precursor | KAEEHHLGILGPQLHADVGDK                 | 4 | 669.8672  | 3.542 | 0.342 |
| 18 | IPI00017601 | 1 | 48.8 | 0.73 | 0.08 | 265 | ## | CP Ceruloplasmin precursor | n[145]AEEHHLGILGPQLHADVGDK[272]       | 4 | 604.8232  | 4.761 | 0.438 |
| 18 | IPI00017601 | 1 | 48.8 | 0.73 | 0.08 | 265 | ## | CP Ceruloplasmin precursor | n[145]NLASRPYTFHSHGITYYK[272]         | 4 | 611.5745  | 3.725 | 0.358 |
| 18 | IPI00017601 | 1 | 48.8 | 0.73 | 0.08 | 265 | ## | CP Ceruloplasmin precursor | n[145]GAYPLSIEPIGVR                   | 2 | 758.4362  | 3.656 | 0.34  |
| 18 | IPI00017601 | 1 | 48.8 | 0.73 | 0.08 | 265 | ## | CP Ceruloplasmin precursor | AETGDKVYVHLK                          | 3 | 594.0087  | 3.513 | 0.355 |
| 18 | IPI00017601 | 1 | 48.8 | 0.73 | 0.08 | 265 | ## | CP Ceruloplasmin precursor | DIASGLIGLIICK                         | 3 | 580.3368  | 2.684 | 0.121 |
| 18 | IPI00017601 | 1 | 48.8 | 0.73 | 0.08 | 265 | ## | CP Ceruloplasmin precursor | SVPPSASHVAPTETFTYEWTVPK[272]          | 3 | 939.1523  | 4.512 | 0.349 |
| 18 | IPI00017601 | 1 | 48.8 | 0.73 | 0.08 | 265 | ## | CP Ceruloplasmin precursor | VTFHNKGAYPLSIEPIGVR                   | 3 | 793.4496  | 3.82  | 0.393 |
| 18 | IPI00017601 | 1 | 48.8 | 0.73 | 0.08 | 265 | ## | CP Ceruloplasmin precursor | n[145]AETGDK[272]VYVHLK[272]          | 3 | 598.0158  | 3.296 | 0.334 |
| 18 | IPI00017601 | 1 | 48.8 | 0.73 | 0.08 | 265 | ## | CP Ceruloplasmin precursor | n[145]GAYPLSIEPIGVR                   | 3 | 505.9599  | 2.863 | 0.282 |
| 18 | IPI00017601 | 1 | 48.8 | 0.73 | 0.08 | 265 | ## | CP Ceruloplasmin precursor | n[145]GPEEHLGILGPVIWAEVGDITIR         | 3 | 877.8015  | 3.002 | 0.332 |
| 18 | IPI00017601 | 1 | 48.8 | 0.73 | 0.08 | 265 | ## | CP Ceruloplasmin precursor | n[145]IYHSHIDAPK[272]                 | 3 | 490.2766  | 3.862 | 0.02  |
| 18 | IPI00017601 | 1 | 48.8 | 0.73 | 0.08 | 265 | ## | CP Ceruloplasmin precursor | n[145]VDK[272]DNEDFQESNR              | 3 | 628.6373  | 4.32  | 0.331 |
| 18 | IPI00017601 | 1 | 48.8 | 0.73 | 0.08 | 265 | ## | CP Ceruloplasmin precursor | TYCSEPEKVDKDNEDFQESNR                 | 4 | 750.5932  | 4.365 | 0.399 |
| 18 | IPI00017601 | 1 | 48.8 | 0.73 | 0.08 | 265 | ## | CP Ceruloplasmin precursor | n[145]AETGDK[272]VYVHLK[272]          | 4 | 448.7637  | 3.575 | 0.358 |
| 18 | IPI00017601 | 1 | 48.8 | 0.73 | 0.08 | 265 | ## | CP Ceruloplasmin precursor | DIFTGLIGPM[147]K                      | 2 | 744.4182  | 3.409 | 0.336 |
| 18 | IPI00017601 | 1 | 48.8 | 0.73 | 0.08 | 265 | ## | CP Ceruloplasmin precursor | KALYLQYDTEFR                          | 2 | 964.5175  | 4.059 | 0.383 |
| 18 | IPI00017601 | 1 | 48.8 | 0.73 | 0.08 | 265 | ## | CP Ceruloplasmin precursor | n[145]DIFTGLIGPM[147]K[272]           | 2 | 748.4253  | 4.166 | 0.363 |
| 18 | IPI00017601 | 1 | 48.8 | 0.73 | 0.08 | 265 | ## | CP Ceruloplasmin precursor | n[145]EYTDASFTNR                      | 2 | 674.3185  | 2.764 | 0.382 |
| 18 | IPI00017601 | 1 | 48.8 | 0.73 | 0.08 | 265 | ## | CP Ceruloplasmin precursor | IYHSHIDAPK                            | 3 | 487.6052  | 3.34  | 0.076 |
| 18 | IPI00017601 | 1 | 48.8 | 0.73 | 0.08 | 265 | ## | CP Ceruloplasmin precursor | n[145]GVYSSDVFDIFPGTYQTLEM[147]FPR    | 3 | 943.7903  | 3.045 | 0.315 |
| 18 | IPI00017601 | 1 | 48.8 | 0.73 | 0.08 | 265 | ## | CP Ceruloplasmin precursor | AETGDKVYVHLK                          | 4 | 445.7584  | 2.523 | 0.293 |
| 18 | IPI00017601 | 1 | 48.8 | 0.73 | 0.08 | 265 | ## | CP Ceruloplasmin precursor | M[147]FTTAPDQVDKEDEDQESNK             | 4 | 728.342   | 2.396 | 0.097 |
| 18 | IPI00017601 | 1 | 48.8 | 0.73 | 0.08 | 265 | ## | CP Ceruloplasmin precursor | GEFYIGSK                              | 2 | 590.8217  | 3.179 | 0.315 |
| 18 | IPI00017601 | 1 | 48.8 | 0.73 | 0.08 | 265 | ## | CP Ceruloplasmin precursor | M[147]YYSAVDPTK                       | 2 | 735.8685  | 2.995 | 0.247 |
| 18 | IPI00017601 | 1 | 48.8 | 0.73 | 0.08 | 265 | ## | CP Ceruloplasmin precursor | n[145]EVGPTNADPVCLAK[272]             | 2 | 874.4517  | 4.546 | 0.324 |
| 18 | IPI00017601 | 1 | 48.8 | 0.73 | 0.08 | 265 | ## | CP Ceruloplasmin precursor | n[145]GEFYIGSK[272]                   | 2 | 594.8288  | 2.933 | 0.28  |
| 18 | IPI00017601 | 1 | 48.8 | 0.73 | 0.08 | 265 | ## | CP Ceruloplasmin precursor | n[145]TYS DHPEK[272]                  | 2 | 632.8243  | 3.239 | 0.338 |
| 18 | IPI00017601 | 1 | 48.8 | 0.73 | 0.08 | 265 | ## | CP Ceruloplasmin precursor | n[145]YTVNQCR                         | 2 | 537.2531  | 1.911 | 0.255 |
| 18 | IPI00017601 | 1 | 48.8 | 0.73 | 0.08 | 265 | ## | CP Ceruloplasmin precursor | TYSDHPEK                              | 2 | 628.8172  | 2.564 | 0.326 |
| 18 | IPI00017601 | 1 | 48.8 | 0.73 | 0.08 | 265 | ## | CP Ceruloplasmin precursor | n[145]IYHSHIDAPK[272]                 | 2 | 734.9112  | 3.692 | 0.185 |
| 18 | IPI00017601 | 1 | 48.8 | 0.73 | 0.08 | 265 | ## | CP Ceruloplasmin precursor | DIFTGLIGPM[147]K                      | 3 | 496.6145  | 3.064 | 0.044 |
| 18 | IPI00017601 | 1 | 48.8 | 0.73 | 0.08 | 265 | ## | CP Ceruloplasmin precursor | MYYSAVDPTKDIFTGLIGPM[147]K            | 4 | 696.6183  | 3.055 | 0.23  |
| 18 | IPI00017601 | 1 | 48.8 | 0.73 | 0.08 | 265 | ## | CP Ceruloplasmin precursor | n[145]TYCSEPEK[272]VDK[272]DNEDFQESNR | 4 | 753.5986  | 1.897 | 0.164 |
| 18 | IPI00017601 | 1 | 48.8 | 0.73 | 0.08 | 265 | ## | CP Ceruloplasmin precursor | n[145]YTVNQCR                         | 1 | 1073.4989 | 2.636 | 0.169 |
| 18 | IPI00017601 | 1 | 48.8 | 0.73 | 0.08 | 265 | ## | CP Ceruloplasmin precursor | IYHSHIDAPK                            | 2 | 730.9041  | 3.861 | 0.22  |

|    |             |   |      |      |      |     |    |                            |                                |   |          |       |       |
|----|-------------|---|------|------|------|-----|----|----------------------------|--------------------------------|---|----------|-------|-------|
| 18 | IPI00017601 | 1 | 48.8 | 0.73 | 0.08 | 265 | ## | CP Ceruloplasmin precursor | n[145]QYTDSTFR                 | 2 | 581.2865 | 1.983 | 0.297 |
| 18 | IPI00017601 | 1 | 48.8 | 0.73 | 0.08 | 265 | ## | CP Ceruloplasmin precursor | KDSDLKEK                       | 3 | 508.3033 | 2.53  | 0.259 |
| 18 | IPI00017601 | 1 | 48.8 | 0.73 | 0.08 | 265 | ## | CP Ceruloplasmin precursor | M[147]YSAVDPTKDIFTGLIGPM[147]K | 3 | 933.8202 | 4.006 | 0.312 |
| 18 | IPI00017601 | 1 | 48.8 | 0.73 | 0.08 | 265 | ## | CP Ceruloplasmin precursor | n[145]EVGPTNADPVCLAK[272]      | 3 | 583.3036 | 2.902 | 0.181 |
| 18 | IPI00017601 | 1 | 48.8 | 0.73 | 0.08 | 265 | ## | CP Ceruloplasmin precursor | n[145]VTFHNK[272]              | 2 | 517.3053 | 2.42  | 0.186 |
| 18 | IPI00017601 | 1 | 48.8 | 0.73 | 0.08 | 265 | ## | CP Ceruloplasmin precursor | n[145]NM[147]ATRPYSIAH         | 3 | 519.9286 | 2.509 | 0.25  |
| 18 | IPI00017601 | 1 | 48.8 | 0.73 | 0.08 | 265 | ## | CP Ceruloplasmin precursor | YTVNQCR                        | 2 | 535.2495 | 2.191 | 0.256 |
| 18 | IPI00017601 | 1 | 48.8 | 0.73 | 0.08 | 265 | ## | CP Ceruloplasmin precursor | n[145]DIFTGLIGPMK[272]         | 3 | 493.9543 | 2.965 | 0.117 |
| 18 | IPI00017601 | 1 | 48.8 | 0.73 | 0.08 | 265 | ## | CP Ceruloplasmin precursor | n[145]VYVHLK[272]              | 2 | 523.8337 | 2.172 | 0.259 |
| 18 | IPI00017601 | 1 | 48.8 | 0.73 | 0.08 | 265 | ## | CP Ceruloplasmin precursor | TYCSEPEK                       | 2 | 641.794  | 2.418 | 0.209 |
| 18 | IPI00017601 | 1 | 48.8 | 0.73 | 0.08 | 265 | ## | CP Ceruloplasmin precursor | TYSDHPEK                       | 3 | 419.5472 | 1.804 | 0.068 |
| 18 | IPI00017601 | 1 | 48.8 | 0.73 | 0.08 | 265 | ## | CP Ceruloplasmin precursor | n[145]QSEDSTFYLGER             | 2 | 788.374  | 2.66  | 0.386 |
| 18 | IPI00017601 | 1 | 48.8 | 0.73 | 0.08 | 265 | ## | CP Ceruloplasmin precursor | VDKDNEDFQESNR                  | 3 | 625.9659 | 2.345 | 0.272 |
| 18 | IPI00017601 | 1 | 48.8 | 0.73 | 0.08 | 265 | ## | CP Ceruloplasmin precursor | VTFHNK                         | 2 | 513.2982 | 2.163 | 0.125 |
| 18 | IPI00017601 | 1 | 48.8 | 0.73 | 0.08 | 265 | ## | CP Ceruloplasmin precursor | KAEEEHLGILGSQLHADVGDK          | 5 | 536.0952 | 3.021 | 0.217 |
| 18 | IPI00017601 | 1 | 48.8 | 0.73 | 0.08 | 265 | ## | CP Ceruloplasmin precursor | n[145]DIFTGLIGPM[147]K[272]    | 3 | 499.2859 | 2.657 | 0.131 |
| 18 | IPI00017601 | 1 | 48.8 | 0.73 | 0.08 | 265 | ## | CP Ceruloplasmin precursor | n[145]RPYLK[272]               | 2 | 482.8128 | 1.743 | 0.175 |
| 18 | IPI00017601 | 1 | 48.8 | 0.73 | 0.08 | 265 | ## | CP Ceruloplasmin precursor | KDSDLKEK                       | 4 | 381.4793 | 1.977 | 0.197 |
| 18 | IPI00017601 | 1 | 48.8 | 0.73 | 0.08 | 265 | ## | CP Ceruloplasmin precursor | QYTDSTFR                       | 2 | 579.2829 | 2.208 | 0.098 |
| 18 | IPI00017601 | 1 | 48.8 | 0.73 | 0.08 | 265 | ## | CP Ceruloplasmin precursor | DIFTGLIGPMK                    | 3 | 491.2829 | 2.325 | 0.133 |
| 18 | IPI00017601 | 1 | 48.8 | 0.73 | 0.08 | 265 | ## | CP Ceruloplasmin precursor | n[145]VTFHNK[272]GAYPLSIEPIGVR | 4 | 597.3426 | 2.535 | 0.188 |
| 18 | IPI00017601 | 1 | 48.8 | 0.73 | 0.08 | 265 | ## | CP Ceruloplasmin precursor | KDSLDK                         | 3 | 375.8924 | 2.164 | 0.083 |
| 18 | IPI00017601 | 1 | 48.8 | 0.73 | 0.08 | 265 | ## | CP Ceruloplasmin precursor | EYTDASFTNRK                    | 3 | 537.9424 | 1.753 | 0.172 |
| 18 | IPI00017601 | 1 | 48.8 | 0.73 | 0.08 | 265 | ## | CP Ceruloplasmin precursor | n[145]VTFHNK[272]              | 3 | 345.206  | 2.146 | 0.092 |
| 18 | IPI00017601 | 1 | 48.8 | 0.73 | 0.08 | 265 | ## | CP Ceruloplasmin precursor | n[145]TYYSPNYNPQSR             | 2 | 817.39   | 3.69  | 0.377 |
| 18 | IPI00017601 | 1 | 48.8 | 0.73 | 0.08 | 265 | ## | CP Ceruloplasmin precursor | n[145]YAPSGIDIFTK[272]         | 2 | 750.4211 | 3.793 | 0.35  |
| 18 | IPI00017601 | 1 | 48.8 | 0.73 | 0.08 | 265 | ## | CP Ceruloplasmin precursor | DSLKEK                         | 2 | 627.8563 | 2.613 | 0.143 |
| 18 | IPI00017601 | 1 | 48.8 | 0.73 | 0.08 | 265 | ## | CP Ceruloplasmin precursor | n[145]IGGSYK[272]K[272]        | 2 | 592.8718 | 1.805 | 0.055 |
| 18 | IPI00017601 | 1 | 48.8 | 0.73 | 0.08 | 265 | ## | CP Ceruloplasmin precursor | IGGSYK                         | 2 | 586.8612 | 1.853 | 0.042 |
| 18 | IPI00017601 | 1 | 48.8 | 0.73 | 0.08 | 265 | ## | CP Ceruloplasmin precursor | KDSDLKEK                       | 2 | 761.9513 | 2.708 | 0.09  |
| 18 | IPI00017601 | 1 | 48.8 | 0.73 | 0.08 | 265 | ## | CP Ceruloplasmin precursor | n[145]DSLDK[272]EK[272]        | 2 | 633.867  | 2.197 | 0.176 |
| 18 | IPI00017601 | 1 | 48.8 | 0.73 | 0.08 | 265 | ## | CP Ceruloplasmin precursor | n[145]YPLSIEPIGVR              | 2 | 694.4069 | 2.681 | 0.385 |
| 18 | IPI00017601 | 1 | 48.8 | 0.73 | 0.08 | 265 | ## | CP Ceruloplasmin precursor | DLYSGLIGPLIVCR                 | 3 | 568.9774 | 2.662 | 0.164 |
| 18 | IPI00017601 | 1 | 48.8 | 0.73 | 0.08 | 265 | ## | CP Ceruloplasmin precursor | KVVYR                          | 3 | 315.5395 | 1.253 | 0.178 |
| 18 | IPI00017601 | 1 | 48.8 | 0.73 | 0.08 | 265 | ## | CP Ceruloplasmin precursor | n[145]DLYSGLIGPLIVCR           | 3 | 570.3131 | 2.357 | 0.122 |
| 18 | IPI00017601 | 1 | 48.8 | 0.73 | 0.08 | 265 | ## | CP Ceruloplasmin precursor | DTANLFPQTSLLH                  | 2 | 849.4465 | 2.771 | 0.209 |
| 18 | IPI00017601 | 1 | 48.8 | 0.73 | 0.08 | 265 | ## | CP Ceruloplasmin precursor | TPGIWLLH                       | 2 | 538.8162 | 2.982 | 0.218 |
| 18 | IPI00017601 | 1 | 48.8 | 0.73 | 0.08 | 265 | ## | CP Ceruloplasmin precursor | n[145]TTIEK[272]PVWLGF         | 2 | 789.9604 | 2.26  | 0.38  |
| 18 | IPI00017601 | 1 | 48.8 | 0.73 | 0.08 | 265 | ## | CP Ceruloplasmin precursor | n[145]IYHSHIDAPK[272]          | 4 | 367.9593 | 2.114 | 0.061 |
| 18 | IPI00017601 | 1 | 48.8 | 0.73 | 0.08 | 265 | ## | CP Ceruloplasmin precursor | n[145]RPYLK[272]               | 3 | 322.2109 | 1.754 | 0.042 |
| 18 | IPI00017601 | 1 | 48.8 | 0.73 | 0.08 | 265 | ## | CP Ceruloplasmin precursor | n[145]DTANLFPQTSLLH            | 2 | 851.4501 | 4.259 | 0.297 |
| 18 | IPI00017601 | 1 | 48.8 | 0.73 | 0.08 | 265 | ## | CP Ceruloplasmin precursor | n[145]YSTVDQVK[272]            | 2 | 614.3448 | 2.481 | 0.288 |
| 18 | IPI00017601 | 1 | 48.8 | 0.73 | 0.08 | 265 | ## | CP Ceruloplasmin precursor | n[145]RDTANLFPQTSLLH           | 3 | 620.0028 | 2.689 | 0.239 |
| 18 | IPI00017601 | 1 | 48.8 | 0.73 | 0.08 | 265 | ## | CP Ceruloplasmin precursor | n[145]TTIEKPVWLGLGPIIK         | 3 | 779.4791 | 2.458 | 0.247 |
| 18 | IPI00017601 | 1 | 48.8 | 0.73 | 0.08 | 265 | ## | CP Ceruloplasmin precursor | n[145]TPGIWLLH                 | 2 | 540.8198 | 2.729 | 0.186 |
| 18 | IPI00017601 | 1 | 48.8 | 0.73 | 0.08 | 265 | ## | CP Ceruloplasmin precursor | n[145]NM[147]ATRPYSIH          | 2 | 675.3413 | 2.465 | 0.308 |
| 18 | IPI00017601 | 1 | 48.8 | 0.73 | 0.08 | 265 | ## | CP Ceruloplasmin precursor | IGGSYK                         | 2 | 452.7662 | 1.373 | 0.093 |
| 18 | IPI00017601 | 1 | 48.8 | 0.73 | 0.08 | 265 | ## | CP Ceruloplasmin precursor | n[145]VFNPR                    | 2 | 388.7304 | 1.311 | 0.014 |



|    |             |   |      |      |      |     |    |                                                                       |                                |   |           |       |       |
|----|-------------|---|------|------|------|-----|----|-----------------------------------------------------------------------|--------------------------------|---|-----------|-------|-------|
| 18 | IPI00017601 | 1 | 48.8 | 0.73 | 0.08 | 265 | ## | CP Ceruloplasmin precursor                                            | KLVYR                          | 2 | 479.8135  | 1.207 | 0.093 |
| 18 | IPI00017601 | 1 | 48.8 | 0.73 | 0.08 | 265 | ## | CP Ceruloplasmin precursor                                            | n[145]NM[147]ATRPYSIAH         | 4 | 390.1983  | 1.665 | 0.134 |
| 18 | IPI00017601 | 1 | 48.8 | 0.73 | 0.08 | 265 | ## | CP Ceruloplasmin precursor                                            | n[145]DSLDK[272]EK[272]        | 3 | 422.9137  | 1.715 | 0.092 |
| 18 | IPI00017601 | 1 | 48.8 | 0.73 | 0.08 | 265 | ## | CP Ceruloplasmin precursor                                            | n[145]TYCSEPEK[272]            | 2 | 645.8011  | 1.292 | 0.035 |
| 18 | IPI00017601 | 1 | 48.8 | 0.73 | 0.08 | 265 | ## | CP Ceruloplasmin precursor                                            | LTTDHYTGGM[147]K               | 3 | 507.2573  | 2.462 | 0.131 |
| 18 | IPI00017601 | 1 | 48.8 | 0.73 | 0.08 | 265 | ## | CP Ceruloplasmin precursor                                            | IGGSYKK                        | 3 | 391.5765  | 1.815 | 0.013 |
| 18 | IPI00017601 | 1 | 48.8 | 0.73 | 0.08 | 265 | ## | CP Ceruloplasmin precursor                                            | n[145]TTIEKPVWLGFLGPIIK        | 4 | 584.8612  | 1.848 | 0.262 |
| 18 | IPI00017601 | 1 | 48.8 | 0.73 | 0.08 | 265 | ## | CP Ceruloplasmin precursor                                            | n[145]NLASRPY                  | 2 | 482.7703  | 2.083 | 0.1   |
| 18 | IPI00017601 | 1 | 48.8 | 0.73 | 0.08 | 265 | ## | CP Ceruloplasmin precursor                                            | n[145]VYVHLK[272]              | 3 | 349.5582  | 1.444 | 0.039 |
| 18 | IPI00017601 | 1 | 48.8 | 0.73 | 0.08 | 265 | ## | CP Ceruloplasmin precursor                                            | n[145]SIEPIGVR                 | 2 | 507.8069  | 2.16  | 0.063 |
| 18 | IPI00017601 | 1 | 48.8 | 0.73 | 0.08 | 265 | ## | CP Ceruloplasmin precursor                                            | n[145]NLASRPYTF                | 2 | 606.8283  | 2.341 | 0.088 |
| 18 | IPI00017601 | 1 | 48.8 | 0.73 | 0.08 | 265 | ## | CP Ceruloplasmin precursor                                            | TYCSEPEKVDK                    | 3 | 588.9602  | 1.941 | 0.014 |
| 18 | IPI00017601 | 1 | 48.8 | 0.73 | 0.08 | 265 | ## | CP Ceruloplasmin precursor                                            | HYYIGIETTWDYASDHGEK[272]       | 3 | 894.7701  | 4.253 | 0.364 |
| 18 | IPI00017601 | 1 | 48.8 | 0.73 | 0.08 | 265 | ## | CP Ceruloplasmin precursor                                            | n[145]NM[147]ATRPYSIAH         | 2 | 779.3893  | 2.038 | 0.101 |
| 18 | IPI00017601 | 1 | 48.8 | 0.73 | 0.08 | 265 | ## | CP Ceruloplasmin precursor                                            | n[145]LSIEPIGVR                | 2 | 564.3489  | 1.999 | 0.092 |
| 18 | IPI00017601 | 1 | 48.8 | 0.73 | 0.08 | 265 | ## | CP Ceruloplasmin precursor                                            | n[145]YHSHID                   | 2 | 514.7677  | 1.811 | 0.06  |
| 19 | IPI00017696 | 1 | 24.2 | 0.7  | 0.07 | 29  | 23 | C1S Complement C1s subcomponent precursor                             | CGHGFPGLNIETK                  | 2 | 898.4528  | 4.081 | 0.484 |
| 19 | IPI00017696 | 1 | 24.2 | 0.7  | 0.07 | 29  | 23 | C1S Complement C1s subcomponent precursor                             | GDSGGAFVQDPNDK                 | 2 | 879.4263  | 4.674 | 0.462 |
| 19 | IPI00017696 | 1 | 24.2 | 0.7  | 0.07 | 29  | 23 | C1S Complement C1s subcomponent precursor                             | n[145]CGHGFPGLNIETK[272]       | 2 | 902.4599  | 4.602 | 0.495 |
| 19 | IPI00017696 | 1 | 24.2 | 0.7  | 0.07 | 29  | 23 | C1S Complement C1s subcomponent precursor                             | n[145]GDSGGAFVQDPNDK[272]      | 2 | 883.4334  | 4.826 | 0.506 |
| 19 | IPI00017696 | 1 | 24.2 | 0.7  | 0.07 | 29  | 23 | C1S Complement C1s subcomponent precursor                             | QFGPYCGHGFPGLNIETK             | 3 | 796.7258  | 4.935 | 0.466 |
| 19 | IPI00017696 | 1 | 24.2 | 0.7  | 0.07 | 29  | 23 | C1S Complement C1s subcomponent precursor                             | SSNNPHSPIVEEFQVPYNK            | 3 | 822.7519  | 4.668 | 0.437 |
| 19 | IPI00017696 | 1 | 24.2 | 0.7  | 0.07 | 29  | 23 | C1S Complement C1s subcomponent precursor                             | n[145]SSNNPHSPIVEEFQVPYNK[272] | 3 | 825.4233  | 4.99  | 0.578 |
| 19 | IPI00017696 | 1 | 24.2 | 0.7  | 0.07 | 29  | 23 | C1S Complement C1s subcomponent precursor                             | n[145]EDTPNSVWEPK[272]         | 2 | 830.9247  | 4.049 | 0.319 |
| 19 | IPI00017696 | 1 | 24.2 | 0.7  | 0.07 | 29  | 23 | C1S Complement C1s subcomponent precursor                             | n[145]VEDPESTLFGSVIR           | 2 | 846.9499  | 3.114 | 0.385 |
| 19 | IPI00017696 | 1 | 24.2 | 0.7  | 0.07 | 29  | 23 | C1S Complement C1s subcomponent precursor                             | n[145]CGHGFPGLNIETK[272]       | 3 | 601.9757  | 4.218 | 0.335 |
| 19 | IPI00017696 | 1 | 24.2 | 0.7  | 0.07 | 29  | 23 | C1S Complement C1s subcomponent precursor                             | EDTPNSVWEPK                    | 2 | 826.9176  | 3.557 | 0.189 |
| 19 | IPI00017696 | 1 | 24.2 | 0.7  | 0.07 | 29  | 23 | C1S Complement C1s subcomponent precursor                             | YHGDPN[147]PCPK                | 2 | 743.8357  | 2.595 | 0.285 |
| 19 | IPI00017696 | 1 | 24.2 | 0.7  | 0.07 | 29  | 23 | C1S Complement C1s subcomponent precursor                             | CGHGFPGLNIETK                  | 3 | 599.3043  | 3.804 | 0.323 |
| 19 | IPI00017696 | 1 | 24.2 | 0.7  | 0.07 | 29  | 23 | C1S Complement C1s subcomponent precursor                             | n[145]TNFNDIALVR               | 2 | 711.3789  | 3.148 | 0.303 |
| 19 | IPI00017696 | 1 | 24.2 | 0.7  | 0.07 | 29  | 23 | C1S Complement C1s subcomponent precursor                             | n[145]CVPVCGVPR                | 2 | 583.2772  | 2.125 | 0.138 |
| 19 | IPI00017696 | 1 | 24.2 | 0.7  | 0.07 | 29  | 23 | C1S Complement C1s subcomponent precursor                             | n[145]LLEVPEGR                 | 2 | 528.8121  | 2.604 | 0.227 |
| 19 | IPI00017696 | 1 | 24.2 | 0.7  | 0.07 | 29  | 23 | C1S Complement C1s subcomponent precursor                             | n[145]SSNNPHSPIVEEFQVPYNK[272] | 4 | 619.3193  | 3.106 | 0.157 |
| 19 | IPI00017696 | 1 | 24.2 | 0.7  | 0.07 | 29  | 23 | C1S Complement C1s subcomponent precursor                             | n[145]QFGPYCGHGFPGLNIETK[272]  | 3 | 799.3972  | 2.473 | 0.203 |
| 19 | IPI00017696 | 1 | 24.2 | 0.7  | 0.07 | 29  | 23 | C1S Complement C1s subcomponent precursor                             | n[145]CEYQIR                   | 2 | 501.2369  | 2.091 | 0.139 |
| 19 | IPI00017696 | 1 | 24.2 | 0.7  | 0.07 | 29  | 23 | C1S Complement C1s subcomponent precursor                             | n[145]SDFSNEER                 | 2 | 564.2579  | 2.197 | 0.145 |
| 19 | IPI00017696 | 1 | 24.2 | 0.7  | 0.07 | 29  | 23 | C1S Complement C1s subcomponent precursor                             | EPFEEK                         | 2 | 529.7795  | 2.167 | 0.12  |
| 19 | IPI00017696 | 1 | 24.2 | 0.7  | 0.07 | 29  | 23 | C1S Complement C1s subcomponent precursor                             | YHGDPN[147]PCPK                | 3 | 496.2262  | 2.244 | 0.127 |
| 19 | IPI00017696 | 1 | 24.2 | 0.7  | 0.07 | 29  | 23 | C1S Complement C1s subcomponent precursor                             | n[145]YVFR                     | 2 | 364.7142  | 1.594 | 0.143 |
| 19 | IPI00017696 | 1 | 24.2 | 0.7  | 0.07 | 29  | 23 | C1S Complement C1s subcomponent precursor                             | M[147]ICAGGEK                  | 2 | 575.7745  | 2.347 | 0.252 |
| 19 | IPI00017696 | 1 | 24.2 | 0.7  | 0.07 | 29  | 23 | C1S Complement C1s subcomponent precursor                             | n[145]VEK[272]PTADAEAYVFTPN    | 2 | 1020.5301 | 3.074 | 0.272 |
| 20 | IPI00018219 | 1 | 6.6  | 1.09 | 0.06 | 3   | 3  | TGFBI Transforming growth factor-beta-induced protein ig-h3 precursor | n[145]DGTTPPIDAHR              | 3 | 441.8973  | 4.142 | 0.38  |
| 20 | IPI00018219 | 1 | 6.6  | 1.09 | 0.06 | 3   | 3  | TGFBI Transforming growth factor-beta-induced protein ig-h3 precursor | DGTTPPIDAHR                    | 3 | 440.5616  | 3.226 | 0.303 |
| 20 | IPI00018219 | 1 | 6.6  | 1.09 | 0.06 | 3   | 3  | TGFBI Transforming growth factor-beta-induced protein ig-h3 precursor | VFVYR                          | 2 | 412.2449  | 1.039 | 0.052 |
| 21 | IPI00018305 | 1 | 17.9 | 0.7  | 0.06 | 6   | 5  | IGFBP3 Insulin-like growth factor-binding protein 3 precursor         | SAGSVESPSVSSTHR                | 3 | 543.2727  | 4.484 | 0.388 |
| 21 | IPI00018305 | 1 | 17.9 | 0.7  | 0.06 | 6   | 5  | IGFBP3 Insulin-like growth factor-binding protein 3 precursor         | n[145]SAGSVESPSVSSTHR          | 3 | 544.6084  | 3.287 | 0.387 |
| 21 | IPI00018305 | 1 | 17.9 | 0.7  | 0.06 | 6   | 5  | IGFBP3 Insulin-like growth factor-binding protein 3 precursor         | n[145]ALAQCAPPAVCAELVR         | 2 | 972.986   | 3.825 | 0.279 |
| 21 | IPI00018305 | 1 | 17.9 | 0.7  | 0.06 | 6   | 5  | IGFBP3 Insulin-like growth factor-binding protein 3 precursor         | n[145]FLNVLSR                  | 2 | 545.3305  | 2.891 | 0.078 |

|    |             |   |      |      |      |     |    |                                                               |                                        |   |           |       |       |
|----|-------------|---|------|------|------|-----|----|---------------------------------------------------------------|----------------------------------------|---|-----------|-------|-------|
| 21 | IPI00018305 | 1 | 17.9 | 0.7  | 0.06 | 6   | 5  | IGFBP3 Insulin-like growth factor-binding protein 3 precursor | n[145]GK[272]EDVHCYSM[147]QS           | 2 | 867.3804  | 2.714 | 0.372 |
| 22 | IPI00019399 | 1 | 33.1 | 0.85 | 0.08 | 18  | 10 | SAA4 Serum amyloid A-4 protein precursor                      | n[145]AYWDIM[147]ISNHQNSNR             | 3 | 670.3187  | 3.965 | 0.382 |
| 22 | IPI00019399 | 1 | 33.1 | 0.85 | 0.08 | 18  | 10 | SAA4 Serum amyloid A-4 protein precursor                      | n[145]EALQGVGDM[147]GR                 | 2 | 646.8229  | 2.928 | 0.349 |
| 22 | IPI00019399 | 1 | 33.1 | 0.85 | 0.08 | 18  | 10 | SAA4 Serum amyloid A-4 protein precursor                      | EALQGVGDM[147]GR                       | 2 | 644.8194  | 2.735 | 0.234 |
| 22 | IPI00019399 | 1 | 33.1 | 0.85 | 0.08 | 18  | 10 | SAA4 Serum amyloid A-4 protein precursor                      | n[145]EALQGVGDMGR                      | 2 | 638.8255  | 2.476 | 0.257 |
| 22 | IPI00019399 | 1 | 33.1 | 0.85 | 0.08 | 18  | 10 | SAA4 Serum amyloid A-4 protein precursor                      | FRPDGLPK                               | 2 | 605.3588  | 2.124 | 0.109 |
| 22 | IPI00019399 | 1 | 33.1 | 0.85 | 0.08 | 18  | 10 | SAA4 Serum amyloid A-4 protein precursor                      | n[145]FRPDGLPK[272]                    | 2 | 609.3659  | 2.303 | 0.06  |
| 22 | IPI00019399 | 1 | 33.1 | 0.85 | 0.08 | 18  | 10 | SAA4 Serum amyloid A-4 protein precursor                      | AYWDIM[147]ISNHQNSNR                   | 3 | 668.983   | 3.097 | 0.105 |
| 22 | IPI00019399 | 1 | 33.1 | 0.85 | 0.08 | 18  | 10 | SAA4 Serum amyloid A-4 protein precursor                      | n[145]YIYAR                            | 2 | 415.2381  | 1.89  | 0     |
| 22 | IPI00019399 | 1 | 33.1 | 0.85 | 0.08 | 18  | 10 | SAA4 Serum amyloid A-4 protein precursor                      | n[145]FRPDGLPK[272]                    | 3 | 406.5797  | 1.691 | 0.021 |
| 22 | IPI00019399 | 1 | 33.1 | 0.85 | 0.08 | 18  | 10 | SAA4 Serum amyloid A-4 protein precursor                      | GPGGVWAAK[272]                         | 2 | 563.8281  | 1.915 | 0.021 |
| 23 | IPI00019568 | 1 | 48.9 | 0.74 | 0.07 | 147 | 72 | F2 Prothrombin precursor (Fragment)                           | ETAASLLQAGYK                           | 2 | 766.4276  | 5.437 | 0.444 |
| 23 | IPI00019568 | 1 | 48.9 | 0.74 | 0.07 | 147 | 72 | F2 Prothrombin precursor (Fragment)                           | KPVAFSDYIHPVCLPDR                      | 2 | 1142.0925 | 5.416 | 0.544 |
| 23 | IPI00019568 | 1 | 48.9 | 0.74 | 0.07 | 147 | 72 | F2 Prothrombin precursor (Fragment)                           | KSPQELLCGASLISDR                       | 2 | 1022.0399 | 5.176 | 0.545 |
| 23 | IPI00019568 | 1 | 48.9 | 0.74 | 0.07 | 147 | 72 | F2 Prothrombin precursor (Fragment)                           | TFGSGEADCGLRPLFEK                      | 2 | 1077.0296 | 5.728 | 0.43  |
| 23 | IPI00019568 | 1 | 48.9 | 0.74 | 0.07 | 147 | 72 | F2 Prothrombin precursor (Fragment)                           | n[145]ETAASLLQAGYK[272]                | 2 | 770.4347  | 4.973 | 0.489 |
| 23 | IPI00019568 | 1 | 48.9 | 0.74 | 0.07 | 147 | 72 | F2 Prothrombin precursor (Fragment)                           | n[145]GQPSVLQVVNLPIVER                 | 2 | 946.5579  | 4.493 | 0.489 |
| 23 | IPI00019568 | 1 | 48.9 | 0.74 | 0.07 | 147 | 72 | F2 Prothrombin precursor (Fragment)                           | n[145]NPDSSTTGPWCYTDDPTVR              | 2 | 1144.5076 | 4.599 | 0.488 |
| 23 | IPI00019568 | 1 | 48.9 | 0.74 | 0.07 | 147 | 72 | F2 Prothrombin precursor (Fragment)                           | n[145]SEGSSVNLSPPLEQCVDR               | 2 | 1102.5258 | 4.629 | 0.347 |
| 23 | IPI00019568 | 1 | 48.9 | 0.74 | 0.07 | 147 | 72 | F2 Prothrombin precursor (Fragment)                           | n[145]TATSEYQTFNPR                     | 2 | 853.4188  | 3.755 | 0.481 |
| 23 | IPI00019568 | 1 | 48.9 | 0.74 | 0.07 | 147 | 72 | F2 Prothrombin precursor (Fragment)                           | n[145]TFGSGEADCGLRPLFEK[272]           | 2 | 1081.0367 | 5.865 | 0.635 |
| 23 | IPI00019568 | 1 | 48.9 | 0.74 | 0.07 | 147 | 72 | F2 Prothrombin precursor (Fragment)                           | n[145]VAFSDYIHPVCLPDR                  | 2 | 961.4747  | 5.5   | 0.479 |
| 23 | IPI00019568 | 1 | 48.9 | 0.74 | 0.07 | 147 | 72 | F2 Prothrombin precursor (Fragment)                           | n[145]YGFYTHVFR                        | 2 | 667.3441  | 2.488 | 0.388 |
| 23 | IPI00019568 | 1 | 48.9 | 0.74 | 0.07 | 147 | 72 | F2 Prothrombin precursor (Fragment)                           | GQPSVLQVVNLPIVERPVCK                   | 3 | 834.4747  | 4.247 | 0.503 |
| 23 | IPI00019568 | 1 | 48.9 | 0.74 | 0.07 | 147 | 72 | F2 Prothrombin precursor (Fragment)                           | KPVAFSDYIHPVCLPDR                      | 3 | 761.7308  | 4.547 | 0.48  |
| 23 | IPI00019568 | 1 | 48.9 | 0.74 | 0.07 | 147 | 72 | F2 Prothrombin precursor (Fragment)                           | KSPQELLCGASLISDR                       | 3 | 681.6957  | 3.268 | 0.395 |
| 23 | IPI00019568 | 1 | 48.9 | 0.74 | 0.07 | 147 | 72 | F2 Prothrombin precursor (Fragment)                           | LKKPVAFSDYIHPVCLPDR                    | 3 | 888.8221  | 3.644 | 0.319 |
| 23 | IPI00019568 | 1 | 48.9 | 0.74 | 0.07 | 147 | 72 | F2 Prothrombin precursor (Fragment)                           | n[145]GQPSVLQVVNLPIVERPVCK[272]        | 3 | 837.1461  | 4.214 | 0.461 |
| 23 | IPI00019568 | 1 | 48.9 | 0.74 | 0.07 | 147 | 72 | F2 Prothrombin precursor (Fragment)                           | n[145]RQECSPVCGQDQVTVAM[147]TPR        | 3 | 857.3973  | 5.584 | 0.447 |
| 23 | IPI00019568 | 1 | 48.9 | 0.74 | 0.07 | 147 | 72 | F2 Prothrombin precursor (Fragment)                           | n[145]TFGSGEADCGLRPLFEK[272]           | 3 | 721.0269  | 4.301 | 0.393 |
| 23 | IPI00019568 | 1 | 48.9 | 0.74 | 0.07 | 147 | 72 | F2 Prothrombin precursor (Fragment)                           | n[145]VAFSDYIHPVCLPDR                  | 3 | 641.3189  | 4.5   | 0.419 |
| 23 | IPI00019568 | 1 | 48.9 | 0.74 | 0.07 | 147 | 72 | F2 Prothrombin precursor (Fragment)                           | n[145]YGFYTHVFR                        | 3 | 445.2318  | 3.486 | 0.286 |
| 23 | IPI00019568 | 1 | 48.9 | 0.74 | 0.07 | 147 | 72 | F2 Prothrombin precursor (Fragment)                           | ITDNM[147]FCAGYKPDEGKR                 | 4 | 607.5459  | 3.279 | 0.548 |
| 23 | IPI00019568 | 1 | 48.9 | 0.74 | 0.07 | 147 | 72 | F2 Prothrombin precursor (Fragment)                           | n[145]LK[272]K[272]PVAFSDYIHPVCLPDR    | 4 | 669.8737  | 5.2   | 0.466 |
| 23 | IPI00019568 | 1 | 48.9 | 0.74 | 0.07 | 147 | 72 | F2 Prothrombin precursor (Fragment)                           | LKKPVAFSDYIHPVCLPDR                    | 5 | 533.6962  | 2.474 | 0.098 |
| 23 | IPI00019568 | 1 | 48.9 | 0.74 | 0.07 | 147 | 72 | F2 Prothrombin precursor (Fragment)                           | n[145]HQDFNSAVQLVENFCR                 | 3 | 699.6636  | 4.038 | 0.315 |
| 23 | IPI00019568 | 1 | 48.9 | 0.74 | 0.07 | 147 | 72 | F2 Prothrombin precursor (Fragment)                           | n[145]LK[272]K[272]PVAFSDYIHPVCLPDR    | 3 | 892.8292  | 3.245 | 0.385 |
| 23 | IPI00019568 | 1 | 48.9 | 0.74 | 0.07 | 147 | 72 | F2 Prothrombin precursor (Fragment)                           | n[145]ITDNM[147]FCAGYK[272]PDEGK[272]R | 4 | 610.5513  | 2.385 | 0.313 |
| 23 | IPI00019568 | 1 | 48.9 | 0.74 | 0.07 | 147 | 72 | F2 Prothrombin precursor (Fragment)                           | n[145]LK[272]K[272]PVAFSDYIHPVCLPDR    | 5 | 536.1004  | 2.871 | 0.217 |
| 23 | IPI00019568 | 1 | 48.9 | 0.74 | 0.07 | 147 | 72 | F2 Prothrombin precursor (Fragment)                           | n[145]GDACEGDSGGPFVVK[272]             | 2 | 902.4014  | 2.22  | 0.34  |
| 23 | IPI00019568 | 1 | 48.9 | 0.74 | 0.07 | 147 | 72 | F2 Prothrombin precursor (Fragment)                           | n[145]ENLDRDIALMK[272]                 | 3 | 535.9673  | 3.338 | 0.298 |
| 23 | IPI00019568 | 1 | 48.9 | 0.74 | 0.07 | 147 | 72 | F2 Prothrombin precursor (Fragment)                           | ETWTANVGK                              | 2 | 643.3486  | 3.311 | 0.229 |
| 23 | IPI00019568 | 1 | 48.9 | 0.74 | 0.07 | 147 | 72 | F2 Prothrombin precursor (Fragment)                           | n[145]GDACEGDSGGPFVVK[147]K[272]       | 2 | 910.3988  | 3.965 | 0.368 |
| 23 | IPI00019568 | 1 | 48.9 | 0.74 | 0.07 | 147 | 72 | F2 Prothrombin precursor (Fragment)                           | n[145]ETWTANVGK[272]                   | 2 | 647.3557  | 3.278 | 0.262 |
| 23 | IPI00019568 | 1 | 48.9 | 0.74 | 0.07 | 147 | 72 | F2 Prothrombin precursor (Fragment)                           | n[145]YTACETAR                         | 2 | 552.7504  | 2.34  | 0.314 |
| 23 | IPI00019568 | 1 | 48.9 | 0.74 | 0.07 | 147 | 72 | F2 Prothrombin precursor (Fragment)                           | ITDNM[147]FCAGYKPDEGKR                 | 3 | 809.7255  | 2.9   | 0.229 |
| 23 | IPI00019568 | 1 | 48.9 | 0.74 | 0.07 | 147 | 72 | F2 Prothrombin precursor (Fragment)                           | n[145]ELLESYIDGR                       | 2 | 669.8547  | 1.631 | 0.042 |
| 23 | IPI00019568 | 1 | 48.9 | 0.74 | 0.07 | 147 | 72 | F2 Prothrombin precursor (Fragment)                           | YTACETAR                               | 2 | 550.7468  | 2.338 | 0.288 |

|    |             |   |      |      |      |     |    |                                     |                                 |   |           |       |       |
|----|-------------|---|------|------|------|-----|----|-------------------------------------|---------------------------------|---|-----------|-------|-------|
| 23 | IPI00019568 | 1 | 48.9 | 0.74 | 0.07 | 147 | 72 | F2 Prothrombin precursor (Fragment) | n[145]SPQELLCGASLISDR           | 2 | 889.9485  | 3.12  | 0.325 |
| 23 | IPI00019568 | 1 | 48.9 | 0.74 | 0.07 | 147 | 72 | F2 Prothrombin precursor (Fragment) | LKKPVAFSDYIHPVCLPDR             | 4 | 666.8684  | 3.335 | 0.296 |
| 23 | IPI00019568 | 1 | 48.9 | 0.74 | 0.07 | 147 | 72 | F2 Prothrombin precursor (Fragment) | DIALM[147]K                     | 2 | 493.7888  | 2.4   | 0.145 |
| 23 | IPI00019568 | 1 | 48.9 | 0.74 | 0.07 | 147 | 72 | F2 Prothrombin precursor (Fragment) | n[145]DIALMK[272]               | 2 | 489.7985  | 2.418 | 0.149 |
| 23 | IPI00019568 | 1 | 48.9 | 0.74 | 0.07 | 147 | 72 | F2 Prothrombin precursor (Fragment) | DIALMK                          | 2 | 485.7914  | 2.365 | 0.12  |
| 23 | IPI00019568 | 1 | 48.9 | 0.74 | 0.07 | 147 | 72 | F2 Prothrombin precursor (Fragment) | n[145]DIALM[147]K[272]          | 2 | 497.7959  | 2.562 | 0.149 |
| 23 | IPI00019568 | 1 | 48.9 | 0.74 | 0.07 | 147 | 72 | F2 Prothrombin precursor (Fragment) | n[145]SGIECQLWR                 | 2 | 641.3137  | 2.873 | 0.164 |
| 23 | IPI00019568 | 1 | 48.9 | 0.74 | 0.07 | 147 | 72 | F2 Prothrombin precursor (Fragment) | n[145]SLEDK[272]TER             | 3 | 422.5695  | 2.977 | 0.189 |
| 23 | IPI00019568 | 1 | 48.9 | 0.74 | 0.07 | 147 | 72 | F2 Prothrombin precursor (Fragment) | GDACEGDSGGPFVM[147]K            | 2 | 906.3917  | 4.275 | 0.229 |
| 23 | IPI00019568 | 1 | 48.9 | 0.74 | 0.07 | 147 | 72 | F2 Prothrombin precursor (Fragment) | n[145]ISMLEK[272]               | 2 | 504.8038  | 2.293 | 0.129 |
| 23 | IPI00019568 | 1 | 48.9 | 0.74 | 0.07 | 147 | 72 | F2 Prothrombin precursor (Fragment) | n[145]YIHPR                     | 2 | 471.7857  | 2.014 | 0.13  |
| 23 | IPI00019568 | 1 | 48.9 | 0.74 | 0.07 | 147 | 72 | F2 Prothrombin precursor (Fragment) | KPVAFSDYIHPVCL                  | 3 | 639.0038  | 3.006 | 0.41  |
| 23 | IPI00019568 | 1 | 48.9 | 0.74 | 0.07 | 147 | 72 | F2 Prothrombin precursor (Fragment) | SGIECQLWR                       | 2 | 639.3101  | 2.537 | 0.125 |
| 23 | IPI00019568 | 1 | 48.9 | 0.74 | 0.07 | 147 | 72 | F2 Prothrombin precursor (Fragment) | n[145]ISM[147]LEK[272]          | 2 | 512.8012  | 1.741 | 0.105 |
| 23 | IPI00019568 | 1 | 48.9 | 0.74 | 0.07 | 147 | 72 | F2 Prothrombin precursor (Fragment) | n[145]PVAFSDYIHPVCLPDR          | 3 | 673.6698  | 2.689 | 0.304 |
| 23 | IPI00019568 | 1 | 48.9 | 0.74 | 0.07 | 147 | 72 | F2 Prothrombin precursor (Fragment) | n[145]FSDYIHPVCLPDR             | 3 | 584.617   | 2.792 | 0.263 |
| 23 | IPI00019568 | 1 | 48.9 | 0.74 | 0.07 | 147 | 72 | F2 Prothrombin precursor (Fragment) | n[145]ETAASLLQAGYK[272]         | 3 | 513.9589  | 2.684 | 0.048 |
| 23 | IPI00019568 | 1 | 48.9 | 0.74 | 0.07 | 147 | 72 | F2 Prothrombin precursor (Fragment) | ISMLEK                          | 2 | 500.7967  | 1.889 | 0.011 |
| 23 | IPI00019568 | 1 | 48.9 | 0.74 | 0.07 | 147 | 72 | F2 Prothrombin precursor (Fragment) | KPVAFSDYIHPVCLPD                | 3 | 709.697   | 2.751 | 0.329 |
| 23 | IPI00019568 | 1 | 48.9 | 0.74 | 0.07 | 147 | 72 | F2 Prothrombin precursor (Fragment) | n[145]SLEDK[272]TER             | 2 | 633.3506  | 2.366 | 0.154 |
| 23 | IPI00019568 | 1 | 48.9 | 0.74 | 0.07 | 147 | 72 | F2 Prothrombin precursor (Fragment) | n[145]YGFYTH                    | 2 | 466.2252  | 2.103 | 0.443 |
| 23 | IPI00019568 | 1 | 48.9 | 0.74 | 0.07 | 147 | 72 | F2 Prothrombin precursor (Fragment) | n[145]SDYIHPVCLPDR              | 2 | 802.8877  | 3.275 | 0.389 |
| 23 | IPI00019568 | 1 | 48.9 | 0.74 | 0.07 | 147 | 72 | F2 Prothrombin precursor (Fragment) | n[145]ENLDRDIALM[147]K[272]     | 2 | 811.4448  | 2.771 | 0.198 |
| 23 | IPI00019568 | 1 | 48.9 | 0.74 | 0.07 | 147 | 72 | F2 Prothrombin precursor (Fragment) | n[145]SAVQLVENFCR               | 2 | 728.3639  | 3.065 | 0.321 |
| 23 | IPI00019568 | 1 | 48.9 | 0.74 | 0.07 | 147 | 72 | F2 Prothrombin precursor (Fragment) | n[145]GFYTHVFR                  | 2 | 585.8125  | 3.115 | 0.251 |
| 23 | IPI00019568 | 1 | 48.9 | 0.74 | 0.07 | 147 | 72 | F2 Prothrombin precursor (Fragment) | n[145]GFYTHVFR                  | 3 | 390.8774  | 2.382 | 0.227 |
| 23 | IPI00019568 | 1 | 48.9 | 0.74 | 0.07 | 147 | 72 | F2 Prothrombin precursor (Fragment) | ISM[147]LEK                     | 2 | 508.7941  | 1.548 | 0.084 |
| 23 | IPI00019568 | 1 | 48.9 | 0.74 | 0.07 | 147 | 72 | F2 Prothrombin precursor (Fragment) | SLEDKTER                        | 3 | 419.8981  | 2.528 | 0.082 |
| 23 | IPI00019568 | 1 | 48.9 | 0.74 | 0.07 | 147 | 72 | F2 Prothrombin precursor (Fragment) | n[145]NIEK[272]ISM[147]LEK[272] | 3 | 551.6588  | 1.922 | 0.153 |
| 23 | IPI00019568 | 1 | 48.9 | 0.74 | 0.07 | 147 | 72 | F2 Prothrombin precursor (Fragment) | SLEDKTER                        | 2 | 629.3435  | 2.415 | 0.136 |
| 23 | IPI00019568 | 1 | 48.9 | 0.74 | 0.07 | 147 | 72 | F2 Prothrombin precursor (Fragment) | TFGSGEADCGLRPLFEK               | 3 | 718.3555  | 1.898 | 0.096 |
| 23 | IPI00019568 | 1 | 48.9 | 0.74 | 0.07 | 147 | 72 | F2 Prothrombin precursor (Fragment) | GDACEGDSGGPFVMK                 | 2 | 898.3943  | 1.447 | 0.058 |
| 23 | IPI00019568 | 1 | 48.9 | 0.74 | 0.07 | 147 | 72 | F2 Prothrombin precursor (Fragment) | n[145]GQPSVLQVNLPIVER           | 3 | 631.3744  | 3.447 | 0.116 |
| 23 | IPI00019568 | 1 | 48.9 | 0.74 | 0.07 | 147 | 72 | F2 Prothrombin precursor (Fragment) | n[145]TFGSGEADCGLR              | 2 | 701.8142  | 2.324 | 0.278 |
| 23 | IPI00019568 | 1 | 48.9 | 0.74 | 0.07 | 147 | 72 | F2 Prothrombin precursor (Fragment) | ANTFLEEVK                       | 3 | 496.2841  | 2.015 | 0.079 |
| 23 | IPI00019568 | 1 | 48.9 | 0.74 | 0.07 | 147 | 72 | F2 Prothrombin precursor (Fragment) | n[145]LAVTTHGLPC                | 2 | 601.3131  | 1.628 | 0.173 |
| 23 | IPI00019568 | 1 | 48.9 | 0.74 | 0.07 | 147 | 72 | F2 Prothrombin precursor (Fragment) | n[145]ENLDRDIALM[147]K[272]     | 3 | 541.2989  | 1.531 | 0.058 |
| 23 | IPI00019568 | 1 | 48.9 | 0.74 | 0.07 | 147 | 72 | F2 Prothrombin precursor (Fragment) | LAVTTH                          | 2 | 391.232   | 1.78  | 0.087 |
| 24 | IPI00019576 | 1 | 9.6  | 0.73 | 0.04 | 4   | 5  | F10 Coagulation factor X precursor  | n[145]QEDACQGDSGGPHVTR          | 3 | 616.2691  | 3.737 | 0.47  |
| 24 | IPI00019576 | 1 | 9.6  | 0.73 | 0.04 | 4   | 5  | F10 Coagulation factor X precursor  | n[145]ETYDFDIAVLR               | 2 | 743.3889  | 3.564 | 0.428 |
| 24 | IPI00019576 | 1 | 9.6  | 0.73 | 0.04 | 4   | 5  | F10 Coagulation factor X precursor  | n[145]YGIYTK[272]               | 2 | 516.8021  | 2.207 | 0.24  |
| 24 | IPI00019576 | 1 | 9.6  | 0.73 | 0.04 | 4   | 5  | F10 Coagulation factor X precursor  | GKYGIYTK                        | 3 | 450.6029  | 2.629 | 0.155 |
| 24 | IPI00019576 | 1 | 9.6  | 0.73 | 0.04 | 4   | 5  | F10 Coagulation factor X precursor  | n[145]TGIVSGFGR                 | 2 | 519.2967  | 1.973 | 0.138 |
| 24 | IPI00019576 | 1 | 9.6  | 0.73 | 0.04 | 4   | 5  | F10 Coagulation factor X precursor  | EM[147]K                        | 1 | 703.3808  | 1.121 | 0.072 |
| 25 | IPI00019580 | 1 | 57.2 | 0.77 | 0.08 | 131 | 78 | PLG Plasminogen precursor           | EPLDDYVNTQGASLFSVTK             | 2 | 1182.6078 | 6.482 | 0.615 |
| 25 | IPI00019580 | 1 | 57.2 | 0.77 | 0.08 | 131 | 78 | PLG Plasminogen precursor           | QLGAGSIEECAAK                   | 2 | 801.9026  | 4.271 | 0.439 |
| 25 | IPI00019580 | 1 | 57.2 | 0.77 | 0.08 | 131 | 78 | PLG Plasminogen precursor           | n[145]DGDVGGPWCYTTNPR           | 2 | 914.3992  | 3.426 | 0.536 |
| 25 | IPI00019580 | 1 | 57.2 | 0.77 | 0.08 | 131 | 78 | PLG Plasminogen precursor           | n[145]EPLDDYVNTQGASLFSVTK[272]  | 2 | 1186.6149 | 6.028 | 0.549 |

|    |             |   |      |      |      |     |    |                           |                                           |   |           |       |       |
|----|-------------|---|------|------|------|-----|----|---------------------------|-------------------------------------------|---|-----------|-------|-------|
| 25 | IPI00019580 | 1 | 57.2 | 0.77 | 0.08 | 131 | 78 | PLG Plasminogen precursor | n[145]FSPATHPSEGLEENYCR                   | 2 | 1063.9732 | 4.26  | 0.536 |
| 25 | IPI00019580 | 1 | 57.2 | 0.77 | 0.08 | 131 | 78 | PLG Plasminogen precursor | n[145]GNVAVTVSGH                          | 2 | 542.797   | 3.286 | 0.454 |
| 25 | IPI00019580 | 1 | 57.2 | 0.77 | 0.08 | 131 | 78 | PLG Plasminogen precursor | n[145]QLGAGSIEECAAK[272]                  | 2 | 805.9097  | 4.574 | 0.517 |
| 25 | IPI00019580 | 1 | 57.2 | 0.77 | 0.08 | 131 | 78 | PLG Plasminogen precursor | n[145]VIPACLSPNYVVADR                     | 2 | 952.4982  | 3.933 | 0.42  |
| 25 | IPI00019580 | 1 | 57.2 | 0.77 | 0.08 | 131 | 78 | PLG Plasminogen precursor | n[145]CTTPPPSSGPTYQCLK[272]               | 3 | 687.3236  | 4.117 | 0.366 |
| 25 | IPI00019580 | 1 | 57.2 | 0.77 | 0.08 | 131 | 78 | PLG Plasminogen precursor | n[145]FSPATHPSEGLEENYCR                   | 3 | 709.6512  | 5.495 | 0.55  |
| 25 | IPI00019580 | 1 | 57.2 | 0.77 | 0.08 | 131 | 78 | PLG Plasminogen precursor | n[145]LYDYCDVPQCAAPSFDCGK[272]PQVEPK[272] | 3 | 1115.1715 | 4.72  | 0.407 |
| 25 | IPI00019580 | 1 | 57.2 | 0.77 | 0.08 | 131 | 78 | PLG Plasminogen precursor | n[145]NPDNDPQGPWCYTTDPEK[272]R            | 3 | 856.3893  | 3.356 | 0.328 |
| 25 | IPI00019580 | 1 | 57.2 | 0.77 | 0.08 | 131 | 78 | PLG Plasminogen precursor | KLYDYCDVPQCAAPSFDCGKQVEPK                 | 4 | 900.6726  | 3.8   | 0.48  |
| 25 | IPI00019580 | 1 | 57.2 | 0.77 | 0.08 | 131 | 78 | PLG Plasminogen precursor | n[145]TM[147]SGLECAWDSQSPHAHGYPK          | 3 | 992.7902  | 4.314 | 0.39  |
| 25 | IPI00019580 | 1 | 57.2 | 0.77 | 0.08 | 131 | 78 | PLG Plasminogen precursor | n[145]VCNRYEFLNGR                         | 3 | 520.9226  | 3.463 | 0.338 |
| 25 | IPI00019580 | 1 | 57.2 | 0.77 | 0.08 | 131 | 78 | PLG Plasminogen precursor | n[145]TM[147]SGLECAWDSQSPHAHGYPK[272]     | 4 | 745.8462  | 3.953 | 0.354 |
| 25 | IPI00019580 | 1 | 57.2 | 0.77 | 0.08 | 131 | 78 | PLG Plasminogen precursor | KLYDYCDVPQCAAPSFDCGKQVEPK                 | 5 | 720.7396  | 3.542 | 0.196 |
| 25 | IPI00019580 | 1 | 57.2 | 0.77 | 0.08 | 131 | 78 | PLG Plasminogen precursor | LSSPAVITDK                                | 2 | 655.8876  | 2.727 | 0.349 |
| 25 | IPI00019580 | 1 | 57.2 | 0.77 | 0.08 | 131 | 78 | PLG Plasminogen precursor | n[145]EQQCVIM[147]AENR                    | 2 | 763.8477  | 3.89  | 0.399 |
| 25 | IPI00019580 | 1 | 57.2 | 0.77 | 0.08 | 131 | 78 | PLG Plasminogen precursor | n[145]HSIFTPETNPR                         | 2 | 721.8791  | 1.922 | 0.095 |
| 25 | IPI00019580 | 1 | 57.2 | 0.77 | 0.08 | 131 | 78 | PLG Plasminogen precursor | n[145]LSSPAVITDK[272]                     | 2 | 659.8947  | 2.546 | 0.064 |
| 25 | IPI00019580 | 1 | 57.2 | 0.77 | 0.08 | 131 | 78 | PLG Plasminogen precursor | n[145]TPENYPNAGLTM[147]NYCR               | 3 | 683.9698  | 3.026 | 0.26  |
| 25 | IPI00019580 | 1 | 57.2 | 0.77 | 0.08 | 131 | 78 | PLG Plasminogen precursor | n[145]VVGGCVAHPH                          | 3 | 389.1957  | 3.281 | 0.42  |
| 25 | IPI00019580 | 1 | 57.2 | 0.77 | 0.08 | 131 | 78 | PLG Plasminogen precursor | n[145]EQQCVIMAENR                         | 2 | 755.8503  | 3.631 | 0.334 |
| 25 | IPI00019580 | 1 | 57.2 | 0.77 | 0.08 | 131 | 78 | PLG Plasminogen precursor | n[145]TPENFPCK[272]                       | 2 | 635.3142  | 3.104 | 0.313 |
| 25 | IPI00019580 | 1 | 57.2 | 0.77 | 0.08 | 131 | 78 | PLG Plasminogen precursor | TPENFPCK                                  | 2 | 631.3071  | 3.134 | 0.267 |
| 25 | IPI00019580 | 1 | 57.2 | 0.77 | 0.08 | 131 | 78 | PLG Plasminogen precursor | n[145]TPENYPNAGLTM[147]NYCR               | 2 | 1025.4511 | 3.847 | 0.342 |
| 25 | IPI00019580 | 1 | 57.2 | 0.77 | 0.08 | 131 | 78 | PLG Plasminogen precursor | n[145]CEEDEEFTCR                          | 2 | 748.7678  | 2.978 | 0.419 |
| 25 | IPI00019580 | 1 | 57.2 | 0.77 | 0.08 | 131 | 78 | PLG Plasminogen precursor | n[145]YEFLNGR                             | 2 | 521.7756  | 1.828 | 0.305 |
| 25 | IPI00019580 | 1 | 57.2 | 0.77 | 0.08 | 131 | 78 | PLG Plasminogen precursor | TKNGITCQK                                 | 3 | 486.9355  | 2.644 | 0.289 |
| 25 | IPI00019580 | 1 | 57.2 | 0.77 | 0.08 | 131 | 78 | PLG Plasminogen precursor | n[145]NLDENYCR                            | 2 | 608.764   | 2.509 | 0.352 |
| 25 | IPI00019580 | 1 | 57.2 | 0.77 | 0.08 | 131 | 78 | PLG Plasminogen precursor | n[145]NPDGDVGGPWCYTTNPR                   | 2 | 1019.947  | 3.831 | 0.457 |
| 25 | IPI00019580 | 1 | 57.2 | 0.77 | 0.08 | 131 | 78 | PLG Plasminogen precursor | n[145]WEYCNLK[272]                        | 2 | 645.3167  | 2.16  | 0.322 |
| 25 | IPI00019580 | 1 | 57.2 | 0.77 | 0.08 | 131 | 78 | PLG Plasminogen precursor | n[145]VYLSECK[272]                        | 2 | 588.3058  | 2.679 | 0.158 |
| 25 | IPI00019580 | 1 | 57.2 | 0.77 | 0.08 | 131 | 78 | PLG Plasminogen precursor | AFQYHSH                                   | 2 | 580.8142  | 2.769 | 0.162 |
| 25 | IPI00019580 | 1 | 57.2 | 0.77 | 0.08 | 131 | 78 | PLG Plasminogen precursor | WEYCNLK                                   | 2 | 641.3096  | 1.897 | 0.105 |
| 25 | IPI00019580 | 1 | 57.2 | 0.77 | 0.08 | 131 | 78 | PLG Plasminogen precursor | n[145]TK[272]NGITCQK[272]                 | 3 | 490.9426  | 3.224 | 0.172 |
| 25 | IPI00019580 | 1 | 57.2 | 0.77 | 0.08 | 131 | 78 | PLG Plasminogen precursor | n[145]VILGAHQEVNLEPHVQEIEVSR              | 3 | 880.8124  | 3.66  | 0.412 |
| 25 | IPI00019580 | 1 | 57.2 | 0.77 | 0.08 | 131 | 78 | PLG Plasminogen precursor | n[145]WELCDIPR                            | 2 | 611.2975  | 2.998 | 0.275 |
| 25 | IPI00019580 | 1 | 57.2 | 0.77 | 0.08 | 131 | 78 | PLG Plasminogen precursor | VYLSECK                                   | 2 | 584.2987  | 2.322 | 0.182 |
| 25 | IPI00019580 | 1 | 57.2 | 0.77 | 0.08 | 131 | 78 | PLG Plasminogen precursor | n[145]LFLEPTR                             | 2 | 510.304   | 2.079 | 0.067 |
| 25 | IPI00019580 | 1 | 57.2 | 0.77 | 0.08 | 131 | 78 | PLG Plasminogen precursor | n[145]GTSSTTTTGK[272]K[272]               | 3 | 500.958   | 2.09  | 0.267 |
| 25 | IPI00019580 | 1 | 57.2 | 0.77 | 0.08 | 131 | 78 | PLG Plasminogen precursor | KVYLSECK                                  | 3 | 479.2649  | 2.571 | 0.105 |
| 25 | IPI00019580 | 1 | 57.2 | 0.77 | 0.08 | 131 | 78 | PLG Plasminogen precursor | n[145]EAQLPVIENK[272]                     | 2 | 714.9187  | 3.311 | 0.217 |
| 25 | IPI00019580 | 1 | 57.2 | 0.77 | 0.08 | 131 | 78 | PLG Plasminogen precursor | n[145]AHGYIPSK[272]FPNK[272]              | 3 | 597.6808  | 3.515 | 0.32  |
| 25 | IPI00019580 | 1 | 57.2 | 0.77 | 0.08 | 131 | 78 | PLG Plasminogen precursor | n[145]VQSTELCAGHLAGGTDCSQGDSGGPLVCFEK[2   | 4 | 873.8873  | 2.89  | 0.065 |
| 25 | IPI00019580 | 1 | 57.2 | 0.77 | 0.08 | 131 | 78 | PLG Plasminogen precursor | n[145]WEYCNLK                             | 2 | 643.3131  | 2.184 | 0.276 |
| 25 | IPI00019580 | 1 | 57.2 | 0.77 | 0.08 | 131 | 78 | PLG Plasminogen precursor | n[145]DIALK[272]                          | 2 | 480.8203  | 1.803 | 1     |
| 25 | IPI00019580 | 1 | 57.2 | 0.77 | 0.08 | 131 | 78 | PLG Plasminogen precursor | EAQLPVIENK                                | 2 | 710.9116  | 2.212 | 0.091 |
| 25 | IPI00019580 | 1 | 57.2 | 0.77 | 0.08 | 131 | 78 | PLG Plasminogen precursor | n[145]SPRPSSYK[272]                       | 2 | 605.3452  | 2.191 | 0.157 |
| 25 | IPI00019580 | 1 | 57.2 | 0.77 | 0.08 | 131 | 78 | PLG Plasminogen precursor | n[145]EPLDDYVNTQGASLFSVTK[272]            | 3 | 791.4123  | 3.265 | 0.261 |
| 25 | IPI00019580 | 1 | 57.2 | 0.77 | 0.08 | 131 | 78 | PLG Plasminogen precursor | n[145]VIPACLSPNYVVADR                     | 3 | 635.3345  | 2.716 | 0.074 |

|    |             |   |      |      |      |     |    |                                                           |                               |   |           |       |       |
|----|-------------|---|------|------|------|-----|----|-----------------------------------------------------------|-------------------------------|---|-----------|-------|-------|
| 25 | IPI00019580 | 1 | 57.2 | 0.77 | 0.08 | 131 | 78 | PLG Plasminogen precursor                                 | KDIALLK                       | 3 | 407.6078  | 2.624 | 0.098 |
| 25 | IPI00019580 | 1 | 57.2 | 0.77 | 0.08 | 131 | 78 | PLG Plasminogen precursor                                 | n[145]SPRPSSYK[272]           | 3 | 403.8992  | 2.045 | 0.098 |
| 25 | IPI00019580 | 1 | 57.2 | 0.77 | 0.08 | 131 | 78 | PLG Plasminogen precursor                                 | DVVLFEK                       | 2 | 565.3345  | 1.682 | 0.107 |
| 25 | IPI00019580 | 1 | 57.2 | 0.77 | 0.08 | 131 | 78 | PLG Plasminogen precursor                                 | NPDADKGPWCFTTDPSVR            | 3 | 778.0332  | 2.372 | 0.17  |
| 25 | IPI00019580 | 1 | 57.2 | 0.77 | 0.08 | 131 | 78 | PLG Plasminogen precursor                                 | PNKPGVYVR                     | 2 | 655.3906  | 2.58  | 0.368 |
| 25 | IPI00019580 | 1 | 57.2 | 0.77 | 0.08 | 131 | 78 | PLG Plasminogen precursor                                 | LFLEPTR                       | 2 | 508.3004  | 1.75  | 0.089 |
| 25 | IPI00019580 | 1 | 57.2 | 0.77 | 0.08 | 131 | 78 | PLG Plasminogen precursor                                 | n[145]PNK[272]PGVYVR          | 2 | 659.3977  | 2.737 | 0.306 |
| 25 | IPI00019580 | 1 | 57.2 | 0.77 | 0.08 | 131 | 78 | PLG Plasminogen precursor                                 | PNKPGVYVR                     | 3 | 437.2628  | 1.999 | 0.27  |
| 25 | IPI00019580 | 1 | 57.2 | 0.77 | 0.08 | 131 | 78 | PLG Plasminogen precursor                                 | CTTPPPSSGPTYQCLK              | 3 | 684.6522  | 2.593 | 0.12  |
| 25 | IPI00019580 | 1 | 57.2 | 0.77 | 0.08 | 131 | 78 | PLG Plasminogen precursor                                 | n[145]ELRPWCFTTDPNK[272]      | 3 | 647.6582  | 2.55  | 0.04  |
| 25 | IPI00019580 | 1 | 57.2 | 0.77 | 0.08 | 131 | 78 | PLG Plasminogen precursor                                 | VIPACLSPPNYVADR               | 3 | 633.9988  | 2.497 | 0.068 |
| 25 | IPI00019580 | 1 | 57.2 | 0.77 | 0.08 | 131 | 78 | PLG Plasminogen precursor                                 | n[145]VVGCVVADPH              | 2 | 583.29    | 2.157 | 0.41  |
| 25 | IPI00019580 | 1 | 57.2 | 0.77 | 0.08 | 131 | 78 | PLG Plasminogen precursor                                 | n[145]VQSTELCAGH              | 2 | 617.7875  | 2.583 | 0.236 |
| 25 | IPI00019580 | 1 | 57.2 | 0.77 | 0.08 | 131 | 78 | PLG Plasminogen precursor                                 | AHGYPKFPNK                    | 3 | 593.6737  | 2.909 | 0.218 |
| 25 | IPI00019580 | 1 | 57.2 | 0.77 | 0.08 | 131 | 78 | PLG Plasminogen precursor                                 | n[145]GNVAVTVSGHTCQH          | 3 | 533.9211  | 2.745 | 0.145 |
| 25 | IPI00019580 | 1 | 57.2 | 0.77 | 0.08 | 131 | 78 | PLG Plasminogen precursor                                 | n[145]AFQYH                   | 2 | 405.2068  | 1.626 | 0.251 |
| 25 | IPI00019580 | 1 | 57.2 | 0.77 | 0.08 | 131 | 78 | PLG Plasminogen precursor                                 | n[145]EQQCVIM[147]AENRK[272]  | 3 | 600.2999  | 2.204 | 0.027 |
| 25 | IPI00019580 | 1 | 57.2 | 0.77 | 0.08 | 131 | 78 | PLG Plasminogen precursor                                 | n[145]VIPACLSPN               | 2 | 600.8155  | 2.216 | 0.223 |
| 25 | IPI00019580 | 1 | 57.2 | 0.77 | 0.08 | 131 | 78 | PLG Plasminogen precursor                                 | GNVAVTVSGH                    | 1 | 1080.5797 | 2.09  | 0.475 |
| 25 | IPI00019580 | 1 | 57.2 | 0.77 | 0.08 | 131 | 78 | PLG Plasminogen precursor                                 | n[145]GNVAVTVSGH              | 1 | 1084.5868 | 2.507 | 0.419 |
| 25 | IPI00019580 | 1 | 57.2 | 0.77 | 0.08 | 131 | 78 | PLG Plasminogen precursor                                 | n[145]ENFPCK[272]             | 2 | 536.2639  | 2.022 | 0.113 |
| 25 | IPI00019580 | 1 | 57.2 | 0.77 | 0.08 | 131 | 78 | PLG Plasminogen precursor                                 | n[145]ELRPWCF                 | 2 | 570.7762  | 1.497 | 0.296 |
| 25 | IPI00019580 | 1 | 57.2 | 0.77 | 0.08 | 131 | 78 | PLG Plasminogen precursor                                 | n[145]DSQSPHAHGYPK[272]       | 3 | 604.6475  | 2.687 | 0.122 |
| 25 | IPI00019580 | 1 | 57.2 | 0.77 | 0.08 | 131 | 78 | PLG Plasminogen precursor                                 | AFQYH                         | 2 | 403.2032  | 1.51  | 0.184 |
| 25 | IPI00019580 | 1 | 57.2 | 0.77 | 0.08 | 131 | 78 | PLG Plasminogen precursor                                 | ENFPCK                        | 2 | 532.2568  | 2.001 | 0.074 |
| 25 | IPI00019580 | 1 | 57.2 | 0.77 | 0.08 | 131 | 78 | PLG Plasminogen precursor                                 | n[145]YVVADR                  | 2 | 433.7463  | 1.935 | 0.05  |
| 25 | IPI00019580 | 1 | 57.2 | 0.77 | 0.08 | 131 | 78 | PLG Plasminogen precursor                                 | n[145]TPENYPNAGLTM[147]N      | 2 | 791.3704  | 2.224 | 0.147 |
| 25 | IPI00019580 | 1 | 57.2 | 0.77 | 0.08 | 131 | 78 | PLG Plasminogen precursor                                 | n[145]TPENYPNAGLTMN           | 2 | 783.373   | 2.21  | 0.081 |
| 25 | IPI00019580 | 1 | 57.2 | 0.77 | 0.08 | 131 | 78 | PLG Plasminogen precursor                                 | n[145]VQSTELCAGHLAG           | 2 | 738.3588  | 2.052 | 0.074 |
| 26 | IPI00019581 | 1 | 10.9 | 0.81 | 0.05 | 17  | 11 | F12 Coagulation factor XII precursor                      | LCHCPVGYTGPFCDVDTK            | 3 | 791.6724  | 5.393 | 0.442 |
| 26 | IPI00019581 | 1 | 10.9 | 0.81 | 0.05 | 17  | 11 | F12 Coagulation factor XII precursor                      | n[145]LCHCPVGYTGPFCDVDTK[272] | 3 | 794.3438  | 5.863 | 0.526 |
| 26 | IPI00019581 | 1 | 10.9 | 0.81 | 0.05 | 17  | 11 | F12 Coagulation factor XII precursor                      | n[145]CLEVEGHR                | 3 | 378.1835  | 3.062 | 0.221 |
| 26 | IPI00019581 | 1 | 10.9 | 0.81 | 0.05 | 17  | 11 | F12 Coagulation factor XII precursor                      | n[145]VVGGLVALR               | 2 | 514.3409  | 3.009 | 0.245 |
| 26 | IPI00019581 | 1 | 10.9 | 0.81 | 0.05 | 17  | 11 | F12 Coagulation factor XII precursor                      | n[145]CFEPQLLR                | 2 | 598.3078  | 1.955 | 0.034 |
| 26 | IPI00019581 | 1 | 10.9 | 0.81 | 0.05 | 17  | 11 | F12 Coagulation factor XII precursor                      | n[145]CLEVEGHR                | 2 | 566.7716  | 2.351 | 0.251 |
| 26 | IPI00019581 | 1 | 10.9 | 0.81 | 0.05 | 17  | 11 | F12 Coagulation factor XII precursor                      | CFEPQLLR                      | 2 | 596.3043  | 1.864 | 0.179 |
| 26 | IPI00019581 | 1 | 10.9 | 0.81 | 0.05 | 17  | 11 | F12 Coagulation factor XII precursor                      | n[145]EQPPSLTR                | 2 | 536.2994  | 2.009 | 0.015 |
| 26 | IPI00019581 | 1 | 10.9 | 0.81 | 0.05 | 17  | 11 | F12 Coagulation factor XII precursor                      | EQPPSLTR                      | 2 | 534.2958  | 2.073 | 0.014 |
| 26 | IPI00019581 | 1 | 10.9 | 0.81 | 0.05 | 17  | 11 | F12 Coagulation factor XII precursor                      | LCHCPVGY                      | 2 | 562.2314  | 1.622 | 0.248 |
| 26 | IPI00019581 | 1 | 10.9 | 0.81 | 0.05 | 17  | 11 | F12 Coagulation factor XII precursor                      | n[145]VK[272]DHCSK[272]       | 3 | 432.2373  | 2.096 | 0.005 |
| 26 | IPI00019581 | 1 | 10.9 | 0.81 | 0.05 | 17  | 11 | F12 Coagulation factor XII precursor                      | NWGLGGHAF                     | 2 | 549.7776  | 1.757 | 0.064 |
| 27 | IPI00019591 | 1 | 45.4 | 0.68 | 0.07 | 154 | 77 | CFB Isoform 1 of Complement factor B precursor (Fragment) | ALFVSEEEKK                    | 2 | 800.4589  | 4.551 | 0.357 |
| 27 | IPI00019591 | 1 | 45.4 | 0.68 | 0.07 | 154 | 77 | CFB Isoform 1 of Complement factor B precursor (Fragment) | EAGIPEFYDYDVALIK              | 2 | 1062.0566 | 4.294 | 0.49  |
| 27 | IPI00019591 | 1 | 45.4 | 0.68 | 0.07 | 154 | 77 | CFB Isoform 1 of Complement factor B precursor (Fragment) | KDNEQHVFK                     | 2 | 782.9334  | 3.645 | 0.464 |
| 27 | IPI00019591 | 1 | 45.4 | 0.68 | 0.07 | 154 | 77 | CFB Isoform 1 of Complement factor B precursor (Fragment) | PQGSCSLEGVEIK                 | 2 | 836.9235  | 3.875 | 0.471 |
| 27 | IPI00019591 | 1 | 45.4 | 0.68 | 0.07 | 154 | 77 | CFB Isoform 1 of Complement factor B precursor (Fragment) | VKDISEVVTPR                   | 2 | 761.9513  | 3.852 | 0.447 |
| 27 | IPI00019591 | 1 | 45.4 | 0.68 | 0.07 | 154 | 77 | CFB Isoform 1 of Complement factor B precursor (Fragment) | VSEADSSNADWVTK                | 2 | 894.9418  | 5.915 | 0.558 |
| 27 | IPI00019591 | 1 | 45.4 | 0.68 | 0.07 | 154 | 77 | CFB Isoform 1 of Complement factor B precursor (Fragment) | YGLVTYATYPK                   | 2 | 778.4296  | 4.491 | 0.497 |

|    |             |   |      |      |      |     |    |                                                           |                                 |   |           |       |       |
|----|-------------|---|------|------|------|-----|----|-----------------------------------------------------------|---------------------------------|---|-----------|-------|-------|
| 27 | IPI00019591 | 1 | 45.4 | 0.68 | 0.07 | 154 | 77 | CFB Isoform 1 of Complement factor B precursor (Fragment) | n[145]FLCTGGVSPYADPNTCR         | 2 | 1018.9446 | 5.63  | 0.507 |
| 27 | IPI00019591 | 1 | 45.4 | 0.68 | 0.07 | 154 | 77 | CFB Isoform 1 of Complement factor B precursor (Fragment) | n[145]GDSGGPLIVHK[272]          | 2 | 684.3979  | 4.088 | 0.421 |
| 27 | IPI00019591 | 1 | 45.4 | 0.68 | 0.07 | 154 | 77 | CFB Isoform 1 of Complement factor B precursor (Fragment) | n[145]LEDSVTYHCSR               | 2 | 750.3406  | 3.611 | 0.489 |
| 27 | IPI00019591 | 1 | 45.4 | 0.68 | 0.07 | 154 | 77 | CFB Isoform 1 of Complement factor B precursor (Fragment) | n[145]LLQEGQALEYVCPSGFYPYPVQTR  | 2 | 1474.7258 | 5.354 | 0.5   |
| 27 | IPI00019591 | 1 | 45.4 | 0.68 | 0.07 | 154 | 77 | CFB Isoform 1 of Complement factor B precursor (Fragment) | n[145]VSEADSSNADWVTK[272]       | 2 | 898.9489  | 4.828 | 0.438 |
| 27 | IPI00019591 | 1 | 45.4 | 0.68 | 0.07 | 154 | 77 | CFB Isoform 1 of Complement factor B precursor (Fragment) | n[145]YGLVTYATYPK[272]          | 2 | 782.4367  | 4.317 | 0.525 |
| 27 | IPI00019591 | 1 | 45.4 | 0.68 | 0.07 | 154 | 77 | CFB Isoform 1 of Complement factor B precursor (Fragment) | n[145]ALFVSEEEK[272]K[272]      | 3 | 537.9821  | 3.504 | 0.438 |
| 27 | IPI00019591 | 1 | 45.4 | 0.68 | 0.07 | 154 | 77 | CFB Isoform 1 of Complement factor B precursor (Fragment) | n[145]LEDSVTYHCSR               | 3 | 500.5628  | 2.567 | 0.217 |
| 27 | IPI00019591 | 1 | 45.4 | 0.68 | 0.07 | 154 | 77 | CFB Isoform 1 of Complement factor B precursor (Fragment) | n[145]QLNEINYEDHK[272]          | 3 | 564.2928  | 5.06  | 0.251 |
| 27 | IPI00019591 | 1 | 45.4 | 0.68 | 0.07 | 154 | 77 | CFB Isoform 1 of Complement factor B precursor (Fragment) | n[145]VASYGVK[272]PR            | 3 | 422.2587  | 2.307 | 0.258 |
| 27 | IPI00019591 | 1 | 45.4 | 0.68 | 0.07 | 154 | 77 | CFB Isoform 1 of Complement factor B precursor (Fragment) | ALFVSEEEK                       | 3 | 533.975   | 3.362 | 0.326 |
| 27 | IPI00019591 | 1 | 45.4 | 0.68 | 0.07 | 154 | 77 | CFB Isoform 1 of Complement factor B precursor (Fragment) | GDSGGPLIVHK                     | 3 | 453.9296  | 3.176 | 0.227 |
| 27 | IPI00019591 | 1 | 45.4 | 0.68 | 0.07 | 154 | 77 | CFB Isoform 1 of Complement factor B precursor (Fragment) | KDNEQHVFK                       | 3 | 522.2914  | 3.057 | 0.33  |
| 27 | IPI00019591 | 1 | 45.4 | 0.68 | 0.07 | 154 | 77 | CFB Isoform 1 of Complement factor B precursor (Fragment) | KVGSQYR                         | 3 | 373.2208  | 2.915 | 0.311 |
| 27 | IPI00019591 | 1 | 45.4 | 0.68 | 0.07 | 154 | 77 | CFB Isoform 1 of Complement factor B precursor (Fragment) | VASYGVKPR                       | 3 | 419.5873  | 1.888 | 0.174 |
| 27 | IPI00019591 | 1 | 45.4 | 0.68 | 0.07 | 154 | 77 | CFB Isoform 1 of Complement factor B precursor (Fragment) | VKDISEVVTNR                     | 3 | 508.3033  | 3.841 | 0.336 |
| 27 | IPI00019591 | 1 | 45.4 | 0.68 | 0.07 | 154 | 77 | CFB Isoform 1 of Complement factor B precursor (Fragment) | n[145]DLEIEVVLFPNYNINGK[272]    | 3 | 801.4368  | 3.363 | 0.449 |
| 27 | IPI00019591 | 1 | 45.4 | 0.68 | 0.07 | 154 | 77 | CFB Isoform 1 of Complement factor B precursor (Fragment) | n[145]GDSGGPLIVHK[272]          | 3 | 456.601   | 3.455 | 0.199 |
| 27 | IPI00019591 | 1 | 45.4 | 0.68 | 0.07 | 154 | 77 | CFB Isoform 1 of Complement factor B precursor (Fragment) | n[145]VK[272]DISEVVTNR          | 3 | 510.9747  | 3.609 | 0.394 |
| 27 | IPI00019591 | 1 | 45.4 | 0.68 | 0.07 | 154 | 77 | CFB Isoform 1 of Complement factor B precursor (Fragment) | n[145]YGQTIRPICLPCTEGTTR        | 3 | 749.0288  | 3.399 | 0.381 |
| 27 | IPI00019591 | 1 | 45.4 | 0.68 | 0.07 | 154 | 77 | CFB Isoform 1 of Complement factor B precursor (Fragment) | KDNEQHVFK                       | 4 | 391.9704  | 2.48  | 0.085 |
| 27 | IPI00019591 | 1 | 45.4 | 0.68 | 0.07 | 154 | 77 | CFB Isoform 1 of Complement factor B precursor (Fragment) | GDSGGPLIVHK                     | 2 | 680.3908  | 3.954 | 0.395 |
| 27 | IPI00019591 | 1 | 45.4 | 0.68 | 0.07 | 154 | 77 | CFB Isoform 1 of Complement factor B precursor (Fragment) | VASYGVKPR                       | 2 | 628.8774  | 1.818 | 0.172 |
| 27 | IPI00019591 | 1 | 45.4 | 0.68 | 0.07 | 154 | 77 | CFB Isoform 1 of Complement factor B precursor (Fragment) | n[145]LPPTTCQQQK[272]           | 2 | 789.9148  | 2.879 | 0.403 |
| 27 | IPI00019591 | 1 | 45.4 | 0.68 | 0.07 | 154 | 77 | CFB Isoform 1 of Complement factor B precursor (Fragment) | n[145]VASYGVK[272]PR            | 2 | 632.8845  | 1.907 | 0.083 |
| 27 | IPI00019591 | 1 | 45.4 | 0.68 | 0.07 | 154 | 77 | CFB Isoform 1 of Complement factor B precursor (Fragment) | CLVNLIEK                        | 2 | 629.3565  | 3.292 | 0.285 |
| 27 | IPI00019591 | 1 | 45.4 | 0.68 | 0.07 | 154 | 77 | CFB Isoform 1 of Complement factor B precursor (Fragment) | n[145]CLVNLIEK[272]             | 2 | 633.3636  | 3.337 | 0.344 |
| 27 | IPI00019591 | 1 | 45.4 | 0.68 | 0.07 | 154 | 77 | CFB Isoform 1 of Complement factor B precursor (Fragment) | n[145]DAQYAPGYDK[272]           | 2 | 708.3559  | 3.583 | 0.376 |
| 27 | IPI00019591 | 1 | 45.4 | 0.68 | 0.07 | 154 | 77 | CFB Isoform 1 of Complement factor B precursor (Fragment) | n[145]DNEQHVFK[272]             | 2 | 652.8455  | 3.485 | 0.224 |
| 27 | IPI00019591 | 1 | 45.4 | 0.68 | 0.07 | 154 | 77 | CFB Isoform 1 of Complement factor B precursor (Fragment) | n[145]QLNEINYEDHK[272]          | 2 | 845.9356  | 3.583 | 0.301 |
| 27 | IPI00019591 | 1 | 45.4 | 0.68 | 0.07 | 154 | 77 | CFB Isoform 1 of Complement factor B precursor (Fragment) | n[145]FLCTGGVSPYADPNTCR         | 3 | 679.6321  | 2.432 | 0.166 |
| 27 | IPI00019591 | 1 | 45.4 | 0.68 | 0.07 | 154 | 77 | CFB Isoform 1 of Complement factor B precursor (Fragment) | QLNEINYEDHK                     | 2 | 841.9285  | 2.822 | 0.382 |
| 27 | IPI00019591 | 1 | 45.4 | 0.68 | 0.07 | 154 | 77 | CFB Isoform 1 of Complement factor B precursor (Fragment) | DAQYAPGYDK                      | 2 | 704.3488  | 3.168 | 0.36  |
| 27 | IPI00019591 | 1 | 45.4 | 0.68 | 0.07 | 154 | 77 | CFB Isoform 1 of Complement factor B precursor (Fragment) | n[145]ALFVSEEEK[272]K[272]      | 2 | 806.4696  | 3.206 | 0.232 |
| 27 | IPI00019591 | 1 | 45.4 | 0.68 | 0.07 | 154 | 77 | CFB Isoform 1 of Complement factor B precursor (Fragment) | DLLYIGK                         | 2 | 551.337   | 1.512 | 0.033 |
| 27 | IPI00019591 | 1 | 45.4 | 0.68 | 0.07 | 154 | 77 | CFB Isoform 1 of Complement factor B precursor (Fragment) | DNEQHVFK                        | 2 | 648.8384  | 2.896 | 0.199 |
| 27 | IPI00019591 | 1 | 45.4 | 0.68 | 0.07 | 154 | 77 | CFB Isoform 1 of Complement factor B precursor (Fragment) | n[145]DLLYIGK[272]              | 2 | 555.3441  | 2.465 | 0.035 |
| 27 | IPI00019591 | 1 | 45.4 | 0.68 | 0.07 | 154 | 77 | CFB Isoform 1 of Complement factor B precursor (Fragment) | n[145]HVILM[147]TDGLHNM[147]GGD | 3 | 633.6455  | 3.274 | 0.373 |
| 27 | IPI00019591 | 1 | 45.4 | 0.68 | 0.07 | 154 | 77 | CFB Isoform 1 of Complement factor B precursor (Fragment) | n[145]ALFVSEEEK[272]            | 2 | 670.371   | 2.849 | 0.187 |
| 27 | IPI00019591 | 1 | 45.4 | 0.68 | 0.07 | 154 | 77 | CFB Isoform 1 of Complement factor B precursor (Fragment) | n[145]DISEVVTNR                 | 2 | 580.3256  | 1.919 | 0.082 |
| 27 | IPI00019591 | 1 | 45.4 | 0.68 | 0.07 | 154 | 77 | CFB Isoform 1 of Complement factor B precursor (Fragment) | ALFVSEEEK                       | 2 | 666.3639  | 2.749 | 0.194 |
| 27 | IPI00019591 | 1 | 45.4 | 0.68 | 0.07 | 154 | 77 | CFB Isoform 1 of Complement factor B precursor (Fragment) | n[145]VK[272]DISEVVTNR          | 2 | 765.9584  | 3.288 | 0.38  |
| 27 | IPI00019591 | 1 | 45.4 | 0.68 | 0.07 | 154 | 77 | CFB Isoform 1 of Complement factor B precursor (Fragment) | n[145]EELLPAQDIK[272]           | 2 | 722.4185  | 2.755 | 0.175 |
| 27 | IPI00019591 | 1 | 45.4 | 0.68 | 0.07 | 154 | 77 | CFB Isoform 1 of Complement factor B precursor (Fragment) | n[145]EAGIPEFYDYDVALIK[272]     | 2 | 1066.0637 | 2.8   | 0.17  |
| 27 | IPI00019591 | 1 | 45.4 | 0.68 | 0.07 | 154 | 77 | CFB Isoform 1 of Complement factor B precursor (Fragment) | DNEQHVFK                        | 3 | 432.8947  | 2.194 | 0.159 |
| 27 | IPI00019591 | 1 | 45.4 | 0.68 | 0.07 | 154 | 77 | CFB Isoform 1 of Complement factor B precursor (Fragment) | KEVYIK                          | 2 | 600.3792  | 2.533 | 0.052 |
| 27 | IPI00019591 | 1 | 45.4 | 0.68 | 0.07 | 154 | 77 | CFB Isoform 1 of Complement factor B precursor (Fragment) | EELLPAQDIK                      | 2 | 718.4114  | 2.507 | 0.098 |
| 27 | IPI00019591 | 1 | 45.4 | 0.68 | 0.07 | 154 | 77 | CFB Isoform 1 of Complement factor B precursor (Fragment) | n[145]TVDDK[272]EHSIK[272]      | 4 | 401.7309  | 2.847 | 0.335 |

|    |             |   |      |      |      |     |    |                                                           |                                         |   |           |       |       |
|----|-------------|---|------|------|------|-----|----|-----------------------------------------------------------|-----------------------------------------|---|-----------|-------|-------|
| 27 | IPI00019591 | 1 | 45.4 | 0.68 | 0.07 | 154 | 77 | CFB Isoform 1 of Complement factor B precursor (Fragment) | n[145]EVYIK[272]                        | 2 | 470.2913  | 2.249 | 0.168 |
| 27 | IPI00019591 | 1 | 45.4 | 0.68 | 0.07 | 154 | 77 | CFB Isoform 1 of Complement factor B precursor (Fragment) | n[145]PQGSCSLEGVEIK[272]                | 2 | 840.9306  | 4.34  | 0.247 |
| 27 | IPI00019591 | 1 | 45.4 | 0.68 | 0.07 | 154 | 77 | CFB Isoform 1 of Complement factor B precursor (Fragment) | n[145]HVIILMTDGLHNM[147]GGDPITVIDEIR    | 3 | 973.8445  | 2.187 | 0.251 |
| 27 | IPI00019591 | 1 | 45.4 | 0.68 | 0.07 | 154 | 77 | CFB Isoform 1 of Complement factor B precursor (Fragment) | n[145]DNEQHVFK[272]                     | 3 | 435.5661  | 2.423 | 0.051 |
| 27 | IPI00019591 | 1 | 45.4 | 0.68 | 0.07 | 154 | 77 | CFB Isoform 1 of Complement factor B precursor (Fragment) | VSEADSSNADWVTK[272]                     | 2 | 896.9454  | 4.116 | 0.383 |
| 27 | IPI00019591 | 1 | 45.4 | 0.68 | 0.07 | 154 | 77 | CFB Isoform 1 of Complement factor B precursor (Fragment) | EVYIK                                   | 2 | 466.2842  | 1.949 | 0.19  |
| 27 | IPI00019591 | 1 | 45.4 | 0.68 | 0.07 | 154 | 77 | CFB Isoform 1 of Complement factor B precursor (Fragment) | n[145]VSVGG EK[272]                     | 2 | 482.2893  | 2.001 | 0.021 |
| 27 | IPI00019591 | 1 | 45.4 | 0.68 | 0.07 | 154 | 77 | CFB Isoform 1 of Complement factor B precursor (Fragment) | EELLPAQDIK                              | 3 | 479.2767  | 2.322 | 0.114 |
| 27 | IPI00019591 | 1 | 45.4 | 0.68 | 0.07 | 154 | 77 | CFB Isoform 1 of Complement factor B precursor (Fragment) | KGTDYHK                                 | 2 | 634.8592  | 1.947 | 0.068 |
| 27 | IPI00019591 | 1 | 45.4 | 0.68 | 0.07 | 154 | 77 | CFB Isoform 1 of Complement factor B precursor (Fragment) | KGTDYHK                                 | 4 | 317.9332  | 2.048 | 0.121 |
| 27 | IPI00019591 | 1 | 45.4 | 0.68 | 0.07 | 154 | 77 | CFB Isoform 1 of Complement factor B precursor (Fragment) | n[145]PICLPCTEGTTR                      | 2 | 763.8514  | 2.583 | 0.253 |
| 27 | IPI00019591 | 1 | 45.4 | 0.68 | 0.07 | 154 | 77 | CFB Isoform 1 of Complement factor B precursor (Fragment) | VASYGVK                                 | 2 | 502.3004  | 2.579 | 0.188 |
| 27 | IPI00019591 | 1 | 45.4 | 0.68 | 0.07 | 154 | 77 | CFB Isoform 1 of Complement factor B precursor (Fragment) | n[145]VCPSPGFYPYPVQTR                   | 2 | 902.4376  | 3.349 | 0.354 |
| 27 | IPI00019591 | 1 | 45.4 | 0.68 | 0.07 | 154 | 77 | CFB Isoform 1 of Complement factor B precursor (Fragment) | n[145]YGQTIRPICLPCTEG                   | 2 | 943.9413  | 2.364 | 0.345 |
| 27 | IPI00019591 | 1 | 45.4 | 0.68 | 0.07 | 154 | 77 | CFB Isoform 1 of Complement factor B precursor (Fragment) | n[145]CYDGYTLR                          | 2 | 590.766   | 2.347 | 0.127 |
| 27 | IPI00019591 | 1 | 45.4 | 0.68 | 0.07 | 154 | 77 | CFB Isoform 1 of Complement factor B precursor (Fragment) | n[145]TAAHCFTVDDK[272]EHSIK[272]        | 4 | 570.7924  | 2.592 | 0.188 |
| 27 | IPI00019591 | 1 | 45.4 | 0.68 | 0.07 | 154 | 77 | CFB Isoform 1 of Complement factor B precursor (Fragment) | QLNEINYEDHK                             | 3 | 561.6214  | 1.824 | 0.064 |
| 27 | IPI00019591 | 1 | 45.4 | 0.68 | 0.07 | 154 | 77 | CFB Isoform 1 of Complement factor B precursor (Fragment) | n[145]VASYGVK[272]                      | 2 | 506.3075  | 2.249 | 0.105 |
| 27 | IPI00019591 | 1 | 45.4 | 0.68 | 0.07 | 154 | 77 | CFB Isoform 1 of Complement factor B precursor (Fragment) | n[145]FVSEEEK[272]K[272]                | 3 | 476.6084  | 3.176 | 0.034 |
| 27 | IPI00019591 | 1 | 45.4 | 0.68 | 0.07 | 154 | 77 | CFB Isoform 1 of Complement factor B precursor (Fragment) | TVDDKEHSIK                              | 3 | 531.2983  | 2.179 | 0.218 |
| 27 | IPI00019591 | 1 | 45.4 | 0.68 | 0.07 | 154 | 77 | CFB Isoform 1 of Complement factor B precursor (Fragment) | KALQAVYSM[147]                          | 2 | 653.8631  | 2.086 | 0.089 |
| 27 | IPI00019591 | 1 | 45.4 | 0.68 | 0.07 | 154 | 77 | CFB Isoform 1 of Complement factor B precursor (Fragment) | n[145]VCPSPGFYPYPVQTR                   | 3 | 601.9608  | 2.589 | 0.099 |
| 27 | IPI00019591 | 1 | 45.4 | 0.68 | 0.07 | 154 | 77 | CFB Isoform 1 of Complement factor B precursor (Fragment) | n[145]YGLVTY                            | 1 | 859.4682  | 1.718 | 0.25  |
| 27 | IPI00019591 | 1 | 45.4 | 0.68 | 0.07 | 154 | 77 | CFB Isoform 1 of Complement factor B precursor (Fragment) | n[145]YGQTIRPICLPC                      | 2 | 800.3854  | 1.681 | 0.244 |
| 27 | IPI00019591 | 1 | 45.4 | 0.68 | 0.07 | 154 | 77 | CFB Isoform 1 of Complement factor B precursor (Fragment) | n[145]DFHINLF                           | 2 | 525.2805  | 1.727 | 0.093 |
| 27 | IPI00019591 | 1 | 45.4 | 0.68 | 0.07 | 154 | 77 | CFB Isoform 1 of Complement factor B precursor (Fragment) | DVCK                                    | 2 | 395.7012  | 1.198 | 0.182 |
| 27 | IPI00019591 | 1 | 45.4 | 0.68 | 0.07 | 154 | 77 | CFB Isoform 1 of Complement factor B precursor (Fragment) | SYGVKPR                                 | 2 | 543.8246  | 1.635 | 0.055 |
| 27 | IPI00019591 | 1 | 45.4 | 0.68 | 0.07 | 154 | 77 | CFB Isoform 1 of Complement factor B precursor (Fragment) | YGLVTY                                  | 1 | 855.4611  | 1.367 | 0.328 |
| 27 | IPI00019591 | 1 | 45.4 | 0.68 | 0.07 | 154 | 77 | CFB Isoform 1 of Complement factor B precursor (Fragment) | n[145]YGQTIR                            | 2 | 441.2517  | 1.544 | 0.033 |
| 27 | IPI00019591 | 1 | 45.4 | 0.68 | 0.07 | 154 | 77 | CFB Isoform 1 of Complement factor B precursor (Fragment) | n[145]LEDSVTYHCS                        | 2 | 672.29    | 1.46  | 0.112 |
| 27 | IPI00019591 | 1 | 45.4 | 0.68 | 0.07 | 154 | 77 | CFB Isoform 1 of Complement factor B precursor (Fragment) | n[145]TVDDK[272]EHSIK[272]              | 3 | 535.3054  | 2.085 | 0.109 |
| 27 | IPI00019591 | 1 | 45.4 | 0.68 | 0.07 | 154 | 77 | CFB Isoform 1 of Complement factor B precursor (Fragment) | SK[272]K[272]                           | 2 | 395.7731  | 0.913 | 0.136 |
| 28 | IPI00019943 | 1 | 48.1 | 0.81 | 0.1  | 86  | 59 | AFM Afamin precursor                                      | AESPEVCFNEESPK                          | 2 | 946.4319  | 5.385 | 0.584 |
| 28 | IPI00019943 | 1 | 48.1 | 0.81 | 0.1  | 86  | 59 | AFM Afamin precursor                                      | ESLLNHFLYEVAR                           | 2 | 865.9649  | 4.374 | 0.462 |
| 28 | IPI00019943 | 1 | 48.1 | 0.81 | 0.1  | 86  | 59 | AFM Afamin precursor                                      | IAPQLSTEELVSLGEK                        | 2 | 997.5621  | 4.736 | 0.526 |
| 28 | IPI00019943 | 1 | 48.1 | 0.81 | 0.1  | 86  | 59 | AFM Afamin precursor                                      | TINPAVDHCCCK                            | 2 | 786.8613  | 3.975 | 0.529 |
| 28 | IPI00019943 | 1 | 48.1 | 0.81 | 0.1  | 86  | 59 | AFM Afamin precursor                                      | n[145]AESPEVCFNEESPK[272]               | 2 | 950.439   | 4.709 | 0.429 |
| 28 | IPI00019943 | 1 | 48.1 | 0.81 | 0.1  | 86  | 59 | AFM Afamin precursor                                      | n[145]ESLLNHFLYEVAR                     | 2 | 867.9684  | 4.372 | 0.403 |
| 28 | IPI00019943 | 1 | 48.1 | 0.81 | 0.1  | 86  | 59 | AFM Afamin precursor                                      | n[145]TINPAVDHCCCK[272]                 | 2 | 790.8684  | 4.275 | 0.453 |
| 28 | IPI00019943 | 1 | 48.1 | 0.81 | 0.1  | 86  | 59 | AFM Afamin precursor                                      | TINPAVDHCCCK                            | 3 | 524.91    | 3.799 | 0.483 |
| 28 | IPI00019943 | 1 | 48.1 | 0.81 | 0.1  | 86  | 59 | AFM Afamin precursor                                      | n[145]LK[272]HELTDEELQSLFTNFANVVDK[272] | 3 | 1041.5627 | 6.172 | 0.567 |
| 28 | IPI00019943 | 1 | 48.1 | 0.81 | 0.1  | 86  | 59 | AFM Afamin precursor                                      | n[145]TINPAVDHCCCK[272]                 | 3 | 527.5814  | 4.51  | 0.527 |
| 28 | IPI00019943 | 1 | 48.1 | 0.81 | 0.1  | 86  | 59 | AFM Afamin precursor                                      | GQCIIINSNKDDRPK                         | 3 | 685.3593  | 4.607 | 0.273 |
| 28 | IPI00019943 | 1 | 48.1 | 0.81 | 0.1  | 86  | 59 | AFM Afamin precursor                                      | KSDVGFLPPFPTLDPEEK                      | 3 | 812.7773  | 3.693 | 0.346 |
| 28 | IPI00019943 | 1 | 48.1 | 0.81 | 0.1  | 86  | 59 | AFM Afamin precursor                                      | n[145]GQCIIINSNK[272]DDRPK[272]         | 3 | 689.3664  | 4.831 | 0.312 |
| 28 | IPI00019943 | 1 | 48.1 | 0.81 | 0.1  | 86  | 59 | AFM Afamin precursor                                      | n[145]RHPDLSIPPELLR                     | 3 | 530.6463  | 2.493 | 0.158 |
| 28 | IPI00019943 | 1 | 48.1 | 0.81 | 0.1  | 86  | 59 | AFM Afamin precursor                                      | n[145]SCCEEQNK[272]                     | 2 | 660.7684  | 2.59  | 0.45  |
| 28 | IPI00019943 | 1 | 48.1 | 0.81 | 0.1  | 86  | 59 | AFM Afamin precursor                                      | n[145]CQAYESNR                          | 2 | 580.7509  | 2.994 | 0.381 |

|    |             |   |      |      |     |    |    |                      |                                  |   |          |       |       |
|----|-------------|---|------|------|-----|----|----|----------------------|----------------------------------|---|----------|-------|-------|
| 28 | IPI00019943 | 1 | 48.1 | 0.81 | 0.1 | 86 | 59 | AFM Afamin precursor | AIPVTQYLK                        | 2 | 656.903  | 2.924 | 0.351 |
| 28 | IPI00019943 | 1 | 48.1 | 0.81 | 0.1 | 86 | 59 | AFM Afamin precursor | MVQQECK                          | 2 | 596.2878 | 2.607 | 0.322 |
| 28 | IPI00019943 | 1 | 48.1 | 0.81 | 0.1 | 86 | 59 | AFM Afamin precursor | n[145]LCFFYNK[272]               | 2 | 634.8242 | 2.852 | 0.32  |
| 28 | IPI00019943 | 1 | 48.1 | 0.81 | 0.1 | 86 | 59 | AFM Afamin precursor | HELTDEELQSLFTNFANVVDK            | 3 | 910.4642 | 2.473 | 0.293 |
| 28 | IPI00019943 | 1 | 48.1 | 0.81 | 0.1 | 86 | 59 | AFM Afamin precursor | LPNNVLQEK                        | 2 | 667.8932 | 2.769 | 0.217 |
| 28 | IPI00019943 | 1 | 48.1 | 0.81 | 0.1 | 86 | 59 | AFM Afamin precursor | SCCEEQNK                         | 2 | 656.7613 | 2.295 | 0.358 |
| 28 | IPI00019943 | 1 | 48.1 | 0.81 | 0.1 | 86 | 59 | AFM Afamin precursor | LCFFYNK                          | 2 | 630.8171 | 2.676 | 0.249 |
| 28 | IPI00019943 | 1 | 48.1 | 0.81 | 0.1 | 86 | 59 | AFM Afamin precursor | n[145]LPNNVLQEK[272]             | 2 | 671.9003 | 2.113 | 0.109 |
| 28 | IPI00019943 | 1 | 48.1 | 0.81 | 0.1 | 86 | 59 | AFM Afamin precursor | n[145]FTFEYSR                    | 2 | 547.2754 | 1.853 | 0.145 |
| 28 | IPI00019943 | 1 | 48.1 | 0.81 | 0.1 | 86 | 59 | AFM Afamin precursor | n[145]HELTDEELQSLFTNFANVVDK[272] | 4 | 685.1036 | 3.208 | 0.167 |
| 28 | IPI00019943 | 1 | 48.1 | 0.81 | 0.1 | 86 | 59 | AFM Afamin precursor | n[145]YHYLIR                     | 2 | 504.791  | 2.465 | 0.177 |
| 28 | IPI00019943 | 1 | 48.1 | 0.81 | 0.1 | 86 | 59 | AFM Afamin precursor | FLVNLVK                          | 2 | 556.8632 | 2.763 | 0.164 |
| 28 | IPI00019943 | 1 | 48.1 | 0.81 | 0.1 | 86 | 59 | AFM Afamin precursor | n[145]FTDSENVQER                 | 2 | 759.3277 | 2.719 | 0.272 |
| 28 | IPI00019943 | 1 | 48.1 | 0.81 | 0.1 | 86 | 59 | AFM Afamin precursor | FTFEYSR                          | 2 | 545.2718 | 2.135 | 0.059 |
| 28 | IPI00019943 | 1 | 48.1 | 0.81 | 0.1 | 86 | 59 | AFM Afamin precursor | n[145]RHPDLSIPELLR               | 2 | 795.4658 | 2.973 | 0.334 |
| 28 | IPI00019943 | 1 | 48.1 | 0.81 | 0.1 | 86 | 59 | AFM Afamin precursor | n[145]FLVNLVK[272]               | 2 | 560.8703 | 2.173 | 0.256 |
| 28 | IPI00019943 | 1 | 48.1 | 0.81 | 0.1 | 86 | 59 | AFM Afamin precursor | YHYLIR                           | 2 | 502.7875 | 2.45  | 0.142 |
| 28 | IPI00019943 | 1 | 48.1 | 0.81 | 0.1 | 86 | 59 | AFM Afamin precursor | n[145]TLPECSK[272]               | 2 | 556.2901 | 2.36  | 0.164 |
| 28 | IPI00019943 | 1 | 48.1 | 0.81 | 0.1 | 86 | 59 | AFM Afamin precursor | n[145]AIPVTQYLK[272]             | 2 | 660.9101 | 2.464 | 0.162 |
| 28 | IPI00019943 | 1 | 48.1 | 0.81 | 0.1 | 86 | 59 | AFM Afamin precursor | HFQNLGK                          | 2 | 562.3222 | 2.348 | 0.164 |
| 28 | IPI00019943 | 1 | 48.1 | 0.81 | 0.1 | 86 | 59 | AFM Afamin precursor | n[145]TVAVHFEEVAK[272]           | 3 | 506.6237 | 3.45  | 0.283 |
| 28 | IPI00019943 | 1 | 48.1 | 0.81 | 0.1 | 86 | 59 | AFM Afamin precursor | ICAM[147]EGLPQK                  | 2 | 716.3615 | 2.145 | 0.231 |
| 28 | IPI00019943 | 1 | 48.1 | 0.81 | 0.1 | 86 | 59 | AFM Afamin precursor | TVAVHFEEVAK                      | 3 | 503.9523 | 3.188 | 0.294 |
| 28 | IPI00019943 | 1 | 48.1 | 0.81 | 0.1 | 86 | 59 | AFM Afamin precursor | n[145]HFQNLGK[272]               | 2 | 566.3293 | 2.255 | 0.117 |
| 28 | IPI00019943 | 1 | 48.1 | 0.81 | 0.1 | 86 | 59 | AFM Afamin precursor | n[145]DMVEYK[272]                | 2 | 536.783  | 1.838 | 0.165 |
| 28 | IPI00019943 | 1 | 48.1 | 0.81 | 0.1 | 86 | 59 | AFM Afamin precursor | IVQIYK                           | 2 | 522.3343 | 2.332 | 0.158 |
| 28 | IPI00019943 | 1 | 48.1 | 0.81 | 0.1 | 86 | 59 | AFM Afamin precursor | n[145]ECCEK[272]                 | 2 | 496.2016 | 1.788 | 0.169 |
| 28 | IPI00019943 | 1 | 48.1 | 0.81 | 0.1 | 86 | 59 | AFM Afamin precursor | TLPECSK                          | 2 | 552.283  | 1.76  | 0.03  |
| 28 | IPI00019943 | 1 | 48.1 | 0.81 | 0.1 | 86 | 59 | AFM Afamin precursor | n[145]MVQQECK[272]               | 2 | 600.2949 | 1.912 | 0.122 |
| 28 | IPI00019943 | 1 | 48.1 | 0.81 | 0.1 | 86 | 59 | AFM Afamin precursor | ECCEK                            | 2 | 492.1945 | 1.776 | 0.147 |
| 28 | IPI00019943 | 1 | 48.1 | 0.81 | 0.1 | 86 | 59 | AFM Afamin precursor | DADPDTFFAK                       | 2 | 703.8512 | 2.196 | 0.127 |
| 28 | IPI00019943 | 1 | 48.1 | 0.81 | 0.1 | 86 | 59 | AFM Afamin precursor | n[145]IVQIYK[272]                | 2 | 526.3414 | 2.207 | 0.169 |
| 28 | IPI00019943 | 1 | 48.1 | 0.81 | 0.1 | 86 | 59 | AFM Afamin precursor | RHPDLSIPELLR                     | 3 | 529.3106 | 1.921 | 0.177 |
| 28 | IPI00019943 | 1 | 48.1 | 0.81 | 0.1 | 86 | 59 | AFM Afamin precursor | LCFFYNK                          | 3 | 510.2771 | 2.443 | 0.026 |
| 28 | IPI00019943 | 1 | 48.1 | 0.81 | 0.1 | 86 | 59 | AFM Afamin precursor | n[145]VNCLQTR                    | 2 | 512.2634 | 1.626 | 0.027 |
| 28 | IPI00019943 | 1 | 48.1 | 0.81 | 0.1 | 86 | 59 | AFM Afamin precursor | NNVLQEK                          | 2 | 562.8248 | 2.925 | 0.184 |
| 28 | IPI00019943 | 1 | 48.1 | 0.81 | 0.1 | 86 | 59 | AFM Afamin precursor | n[145]IK[272]ECCEK[272]          | 3 | 459.5639 | 2.803 | 0.162 |
| 28 | IPI00019943 | 1 | 48.1 | 0.81 | 0.1 | 86 | 59 | AFM Afamin precursor | n[145]NNVLQEK[272]               | 2 | 566.8319 | 2.342 | 0.068 |
| 28 | IPI00019943 | 1 | 48.1 | 0.81 | 0.1 | 86 | 59 | AFM Afamin precursor | IKECCEK                          | 2 | 682.8315 | 2.35  | 0.226 |
| 28 | IPI00019943 | 1 | 48.1 | 0.81 | 0.1 | 86 | 59 | AFM Afamin precursor | n[145]YHYLIR                     | 3 | 336.8631 | 1.699 | 0.004 |
| 28 | IPI00019943 | 1 | 48.1 | 0.81 | 0.1 | 86 | 59 | AFM Afamin precursor | LKHELTDEELQSLFTNFANVVDK          | 4 | 778.4185 | 2.494 | 0.064 |
| 28 | IPI00019943 | 1 | 48.1 | 0.81 | 0.1 | 86 | 59 | AFM Afamin precursor | n[145]ESLLNHFLYEVAR              | 3 | 578.9814 | 2.162 | 0.007 |
| 28 | IPI00019943 | 1 | 48.1 | 0.81 | 0.1 | 86 | 59 | AFM Afamin precursor | IKECCEK                          | 3 | 455.5568 | 2.094 | 0.106 |
| 28 | IPI00019943 | 1 | 48.1 | 0.81 | 0.1 | 86 | 59 | AFM Afamin precursor | n[145]CFESLK[272]                | 2 | 530.7741 | 2.122 | 0.15  |
| 28 | IPI00019943 | 1 | 48.1 | 0.81 | 0.1 | 86 | 59 | AFM Afamin precursor | CFESLK                           | 2 | 526.767  | 1.8   | 0.141 |
| 28 | IPI00019943 | 1 | 48.1 | 0.81 | 0.1 | 86 | 59 | AFM Afamin precursor | n[145]ICAM[147]EGLPQK[272]       | 2 | 720.3686 | 2.41  | 0.03  |
| 28 | IPI00019943 | 1 | 48.1 | 0.81 | 0.1 | 86 | 59 | AFM Afamin precursor | n[145]RNPFVFAPTL                 | 2 | 709.9175 | 2.155 | 0.131 |
| 28 | IPI00019943 | 1 | 48.1 | 0.81 | 0.1 | 86 | 59 | AFM Afamin precursor | RNPFVFAPTL                       | 2 | 707.9139 | 2.065 | 0.187 |



|    |             |   |      |      |      |    |    |                                            |                                  |   |           |       |       |
|----|-------------|---|------|------|------|----|----|--------------------------------------------|----------------------------------|---|-----------|-------|-------|
| 29 | IPI00020019 | 1 | 12.3 | 1    | 0.01 | 5  | 4  | ADIPOQ Adiponectin precursor               | IFYNQQNHVDGSGTK                  | 3 | 684.6693  | 3.839 | 0.393 |
| 29 | IPI00020019 | 1 | 12.3 | 1    | 0.01 | 5  | 4  | ADIPOQ Adiponectin precursor               | n[145]IFYNQQNHVDGSGTK[272]       | 3 | 687.3407  | 4.434 | 0.402 |
| 29 | IPI00020019 | 1 | 12.3 | 1    | 0.01 | 5  | 4  | ADIPOQ Adiponectin precursor               | GDIGETGVPGAEGPR                  | 2 | 776.3917  | 3.632 | 0.442 |
| 29 | IPI00020019 | 1 | 12.3 | 1    | 0.01 | 5  | 4  | ADIPOQ Adiponectin precursor               | n[145]GDIGETGVPGAEGPR            | 2 | 778.3953  | 2.447 | 0.273 |
| 30 | IPI00020091 | 1 | 49.8 | 0.98 | 0.29 | 27 | 24 | ORM2 Alpha-1-acid glycoprotein 2 precursor | n[145]EHVAHLLFLR                 | 2 | 689.9074  | 3.635 | 0.38  |
| 30 | IPI00020091 | 1 | 49.8 | 0.98 | 0.29 | 27 | 24 | ORM2 Alpha-1-acid glycoprotein 2 precursor | n[145]TLMFGSYLDDEK[272]          | 2 | 853.9311  | 4.492 | 0.516 |
| 30 | IPI00020091 | 1 | 49.8 | 0.98 | 0.29 | 27 | 24 | ORM2 Alpha-1-acid glycoprotein 2 precursor | n[145]EHVAHLLFLR                 | 3 | 460.274   | 4.407 | 0.351 |
| 30 | IPI00020091 | 1 | 49.8 | 0.98 | 0.29 | 27 | 24 | ORM2 Alpha-1-acid glycoprotein 2 precursor | n[145]YEGGREHVAHLLFLR            | 3 | 647.6907  | 3.933 | 0.423 |
| 30 | IPI00020091 | 1 | 49.8 | 0.98 | 0.29 | 27 | 24 | ORM2 Alpha-1-acid glycoprotein 2 precursor | TLM[147]FGSYLDDEKNWGLSFYADKPETTK | 4 | 933.971   | 4.955 | 0.514 |
| 30 | IPI00020091 | 1 | 49.8 | 0.98 | 0.29 | 27 | 24 | ORM2 Alpha-1-acid glycoprotein 2 precursor | TLMFGSYLDDEK                     | 2 | 849.924   | 4.243 | 0.385 |
| 30 | IPI00020091 | 1 | 49.8 | 0.98 | 0.29 | 27 | 24 | ORM2 Alpha-1-acid glycoprotein 2 precursor | n[145]EHVAHLLFLR                 | 4 | 345.4574  | 1.76  | 0.054 |
| 30 | IPI00020091 | 1 | 49.8 | 0.98 | 0.29 | 27 | 24 | ORM2 Alpha-1-acid glycoprotein 2 precursor | n[145]YEGGREHVAHLLFLR            | 4 | 486.0199  | 3.803 | 0.29  |
| 30 | IPI00020091 | 1 | 49.8 | 0.98 | 0.29 | 27 | 24 | ORM2 Alpha-1-acid glycoprotein 2 precursor | n[145]TLM[147]FGSYLDDEK[272]     | 2 | 861.9286  | 3.89  | 0.352 |
| 30 | IPI00020091 | 1 | 49.8 | 0.98 | 0.29 | 27 | 24 | ORM2 Alpha-1-acid glycoprotein 2 precursor | n[145]DK[272]CEPLEK[272]         | 3 | 480.5915  | 3.228 | 0.147 |
| 30 | IPI00020091 | 1 | 49.8 | 0.98 | 0.29 | 27 | 24 | ORM2 Alpha-1-acid glycoprotein 2 precursor | SDVMYTDWK                        | 2 | 712.8476  | 3.179 | 0.348 |
| 30 | IPI00020091 | 1 | 49.8 | 0.98 | 0.29 | 27 | 24 | ORM2 Alpha-1-acid glycoprotein 2 precursor | DKCEPLEK                         | 3 | 476.5844  | 2.348 | 0.263 |
| 30 | IPI00020091 | 1 | 49.8 | 0.98 | 0.29 | 27 | 24 | ORM2 Alpha-1-acid glycoprotein 2 precursor | n[145]YEGGREHVAHLLFLR            | 5 | 389.0173  | 2.84  | 0.137 |
| 30 | IPI00020091 | 1 | 49.8 | 0.98 | 0.29 | 27 | 24 | ORM2 Alpha-1-acid glycoprotein 2 precursor | n[145]TEDTIFLR                   | 1 | 1138.6225 | 2.6   | 0.235 |
| 30 | IPI00020091 | 1 | 49.8 | 0.98 | 0.29 | 27 | 24 | ORM2 Alpha-1-acid glycoprotein 2 precursor | n[145]TEDTIFLR                   | 2 | 569.8149  | 2.252 | 0.02  |
| 30 | IPI00020091 | 1 | 49.8 | 0.98 | 0.29 | 27 | 24 | ORM2 Alpha-1-acid glycoprotein 2 precursor | n[145]EQLGEFYEALDCLCIPR          | 3 | 745.674   | 2.237 | 0.292 |
| 30 | IPI00020091 | 1 | 49.8 | 0.98 | 0.29 | 27 | 24 | ORM2 Alpha-1-acid glycoprotein 2 precursor | n[145]NWGLSFYADKPETTK            | 3 | 727.7202  | 3.22  | 0.281 |
| 30 | IPI00020091 | 1 | 49.8 | 0.98 | 0.29 | 27 | 24 | ORM2 Alpha-1-acid glycoprotein 2 precursor | n[145]SDVMYTDWK[272]             | 2 | 716.8547  | 2.857 | 0.213 |
| 30 | IPI00020091 | 1 | 49.8 | 0.98 | 0.29 | 27 | 24 | ORM2 Alpha-1-acid glycoprotein 2 precursor | SDVM[147]YTDWK                   | 2 | 720.8451  | 2.809 | 0.209 |
| 30 | IPI00020091 | 1 | 49.8 | 0.98 | 0.29 | 27 | 24 | ORM2 Alpha-1-acid glycoprotein 2 precursor | n[145]CEPLEK[272]                | 2 | 526.7716  | 1.507 | 0.229 |
| 30 | IPI00020091 | 1 | 49.8 | 0.98 | 0.29 | 27 | 24 | ORM2 Alpha-1-acid glycoprotein 2 precursor | n[145]CEPLEK[272]                | 1 | 1052.5359 | 1.61  | 0.168 |
| 30 | IPI00020091 | 1 | 49.8 | 0.98 | 0.29 | 27 | 24 | ORM2 Alpha-1-acid glycoprotein 2 precursor | DKCEPLEK                         | 2 | 714.3729  | 2.542 | 0.263 |
| 30 | IPI00020091 | 1 | 49.8 | 0.98 | 0.29 | 27 | 24 | ORM2 Alpha-1-acid glycoprotein 2 precursor | n[145]DK[272]CEPLEK[272]         | 2 | 720.3836  | 2.88  | 0.121 |
| 30 | IPI00020091 | 1 | 49.8 | 0.98 | 0.29 | 27 | 24 | ORM2 Alpha-1-acid glycoprotein 2 precursor | n[145]FYIASAFR                   | 2 | 559.8094  | 2.117 | 0.267 |
| 30 | IPI00020091 | 1 | 49.8 | 0.98 | 0.29 | 27 | 24 | ORM2 Alpha-1-acid glycoprotein 2 precursor | CEPLEK                           | 2 | 522.7645  | 1.847 | 0.016 |
| 30 | IPI00020091 | 1 | 49.8 | 0.98 | 0.29 | 27 | 24 | ORM2 Alpha-1-acid glycoprotein 2 precursor | n[145]SSYLNVR                    | 2 | 555.8048  | 2.701 | 0.185 |
| 30 | IPI00020091 | 1 | 49.8 | 0.98 | 0.29 | 27 | 24 | ORM2 Alpha-1-acid glycoprotein 2 precursor | n[145]YIASAFR                    | 2 | 486.2752  | 1.866 | 0.286 |
| 30 | IPI00020091 | 1 | 49.8 | 0.98 | 0.29 | 27 | 24 | ORM2 Alpha-1-acid glycoprotein 2 precursor | n[145]IASAFR                     | 2 | 404.7435  | 1.822 | 0.055 |
| 30 | IPI00020091 | 1 | 49.8 | 0.98 | 0.29 | 27 | 24 | ORM2 Alpha-1-acid glycoprotein 2 precursor | n[145]YLNVR                      | 2 | 468.7728  | 1.886 | 0.018 |
| 31 | IPI00020986 | 1 | 18.6 | 0.93 | 0.05 | 18 | 15 | LUM Lumican precursor                      | LKEDAVSAAFK                      | 2 | 799.9669  | 4.588 | 0.382 |
| 31 | IPI00020986 | 1 | 18.6 | 0.93 | 0.05 | 18 | 15 | LUM Lumican precursor                      | n[145]LK[272]EDAVSAAFK[272]      | 2 | 805.9776  | 4.661 | 0.497 |
| 31 | IPI00020986 | 1 | 18.6 | 0.93 | 0.05 | 18 | 15 | LUM Lumican precursor                      | n[145]SLEDLQLTHNK[272]           | 2 | 793.4431  | 4.842 | 0.399 |
| 31 | IPI00020986 | 1 | 18.6 | 0.93 | 0.05 | 18 | 15 | LUM Lumican precursor                      | SLEDLQLTHNK                      | 3 | 526.6264  | 3.645 | 0.42  |
| 31 | IPI00020986 | 1 | 18.6 | 0.93 | 0.05 | 18 | 15 | LUM Lumican precursor                      | n[145]NNQIDHIDEK[272]            | 3 | 505.2665  | 3.852 | 0.373 |
| 31 | IPI00020986 | 1 | 18.6 | 0.93 | 0.05 | 18 | 15 | LUM Lumican precursor                      | n[145]SLEDLQLTHNK[272]           | 3 | 529.2978  | 4.121 | 0.458 |
| 31 | IPI00020986 | 1 | 18.6 | 0.93 | 0.05 | 18 | 15 | LUM Lumican precursor                      | LKEDAVSAAFK                      | 3 | 533.647   | 3.077 | 0.295 |
| 31 | IPI00020986 | 1 | 18.6 | 0.93 | 0.05 | 18 | 15 | LUM Lumican precursor                      | SLEDLQLTHNK                      | 2 | 789.436   | 4.199 | 0.362 |
| 31 | IPI00020986 | 1 | 18.6 | 0.93 | 0.05 | 18 | 15 | LUM Lumican precursor                      | NNQIDHIDEK                       | 2 | 753.389   | 3.586 | 0.323 |
| 31 | IPI00020986 | 1 | 18.6 | 0.93 | 0.05 | 18 | 15 | LUM Lumican precursor                      | n[145]FNALQYLR                   | 2 | 584.8334  | 3.234 | 0.325 |
| 31 | IPI00020986 | 1 | 18.6 | 0.93 | 0.05 | 18 | 15 | LUM Lumican precursor                      | NNQIDHIDEK                       | 3 | 502.5951  | 2.953 | 0.272 |
| 31 | IPI00020986 | 1 | 18.6 | 0.93 | 0.05 | 18 | 15 | LUM Lumican precursor                      | n[145]SLEYLDLSFNQIAR             | 2 | 906.9843  | 3.303 | 0.286 |
| 31 | IPI00020986 | 1 | 18.6 | 0.93 | 0.05 | 18 | 15 | LUM Lumican precursor                      | FNALQYLR                         | 2 | 582.8299  | 2.62  | 0.071 |
| 31 | IPI00020986 | 1 | 18.6 | 0.93 | 0.05 | 18 | 15 | LUM Lumican precursor                      | n[145]ILGPLSYSK[272]             | 2 | 633.389   | 2.668 | 0.209 |
| 31 | IPI00020986 | 1 | 18.6 | 0.93 | 0.05 | 18 | 15 | LUM Lumican precursor                      | ILGPLSYSK                        | 2 | 629.3819  | 1.91  | 0.078 |

|    |             |   |      |      |      |    |    |                                                                       |                                    |   |          |       |       |
|----|-------------|---|------|------|------|----|----|-----------------------------------------------------------------------|------------------------------------|---|----------|-------|-------|
| 32 | IPI00020996 | 1 | 33.4 | 0.76 | 0.07 | 38 | 25 | IGFALS Insulin-like growth factor-binding protein complex acid labile | n[145]DLHFLEELQLGHNR               | 2 | 932.993  | 4.709 | 0.445 |
| 32 | IPI00020996 | 1 | 33.4 | 0.76 | 0.07 | 38 | 25 | IGFALS Insulin-like growth factor-binding protein complex acid labile | n[145]DLHFLEELQLGHNR               | 3 | 622.3311 | 6.299 | 0.316 |
| 32 | IPI00020996 | 1 | 33.4 | 0.76 | 0.07 | 38 | 25 | IGFALS Insulin-like growth factor-binding protein complex acid labile | n[145]LHSLHLEGSCGLGR               | 3 | 537.9454 | 3.868 | 0.357 |
| 32 | IPI00020996 | 1 | 33.4 | 0.76 | 0.07 | 38 | 25 | IGFALS Insulin-like growth factor-binding protein complex acid labile | n[145]SFEGLGQLEVLTLDHNQLQEVK[272]  | 3 | 929.1707 | 4.858 | 0.414 |
| 32 | IPI00020996 | 1 | 33.4 | 0.76 | 0.07 | 38 | 25 | IGFALS Insulin-like growth factor-binding protein complex acid labile | n[145]DLHFLEELQLGHNR               | 4 | 467.0001 | 4.527 | 0.354 |
| 32 | IPI00020996 | 1 | 33.4 | 0.76 | 0.07 | 38 | 25 | IGFALS Insulin-like growth factor-binding protein complex acid labile | NLIAAVAPGAFGLK                     | 3 | 579.0258 | 2.922 | 0.312 |
| 32 | IPI00020996 | 1 | 33.4 | 0.76 | 0.07 | 38 | 25 | IGFALS Insulin-like growth factor-binding protein complex acid labile | n[145]AFWLDVSHNR                   | 3 | 463.5779 | 3.819 | 0.273 |
| 32 | IPI00020996 | 1 | 33.4 | 0.76 | 0.07 | 38 | 25 | IGFALS Insulin-like growth factor-binding protein complex acid labile | n[145]DFALQNPSAVPR                 | 2 | 729.8947 | 4.408 | 0.361 |
| 32 | IPI00020996 | 1 | 33.4 | 0.76 | 0.07 | 38 | 25 | IGFALS Insulin-like growth factor-binding protein complex acid labile | n[145]LAYLQPALFSGLAELR             | 2 | 953.5496 | 3.345 | 0.447 |
| 32 | IPI00020996 | 1 | 33.4 | 0.76 | 0.07 | 38 | 25 | IGFALS Insulin-like growth factor-binding protein complex acid labile | n[145]LEALPNSSLAPLGR               | 2 | 804.4837 | 3.712 | 0.285 |
| 32 | IPI00020996 | 1 | 33.4 | 0.76 | 0.07 | 38 | 25 | IGFALS Insulin-like growth factor-binding protein complex acid labile | n[145]WLDLSHNR                     | 3 | 395.5479 | 3.225 | 0.193 |
| 32 | IPI00020996 | 1 | 33.4 | 0.76 | 0.07 | 38 | 25 | IGFALS Insulin-like growth factor-binding protein complex acid labile | n[145]ANVVFVQLPR                   | 2 | 594.3545 | 3.363 | 0.248 |
| 32 | IPI00020996 | 1 | 33.4 | 0.76 | 0.07 | 38 | 25 | IGFALS Insulin-like growth factor-binding protein complex acid labile | n[145]LEYLLLSR                     | 2 | 575.8513 | 3.028 | 0.275 |
| 32 | IPI00020996 | 1 | 33.4 | 0.76 | 0.07 | 38 | 25 | IGFALS Insulin-like growth factor-binding protein complex acid labile | n[145]LAELPADALGPLQR               | 2 | 804.4655 | 2.728 | 0.308 |
| 32 | IPI00020996 | 1 | 33.4 | 0.76 | 0.07 | 38 | 25 | IGFALS Insulin-like growth factor-binding protein complex acid labile | n[145]LHSLHLEGSCGLGR               | 2 | 806.4144 | 3.409 | 0.269 |
| 32 | IPI00020996 | 1 | 33.4 | 0.76 | 0.07 | 38 | 25 | IGFALS Insulin-like growth factor-binding protein complex acid labile | n[145]NLIAAVAPGAFGLK[272]          | 2 | 872.0422 | 2.878 | 0.351 |
| 32 | IPI00020996 | 1 | 33.4 | 0.76 | 0.07 | 38 | 25 | IGFALS Insulin-like growth factor-binding protein complex acid labile | n[145]LHSLHLEGSCGLGR               | 4 | 403.7109 | 2.24  | 0.147 |
| 32 | IPI00020996 | 1 | 33.4 | 0.76 | 0.07 | 38 | 25 | IGFALS Insulin-like growth factor-binding protein complex acid labile | n[145]TFTPQPPGLER                  | 2 | 693.8785 | 2.682 | 0.233 |
| 32 | IPI00020996 | 1 | 33.4 | 0.76 | 0.07 | 38 | 25 | IGFALS Insulin-like growth factor-binding protein complex acid labile | n[145]NLPEQVFR                     | 2 | 573.823  | 2.481 | 0.182 |
| 32 | IPI00020996 | 1 | 33.4 | 0.76 | 0.07 | 38 | 25 | IGFALS Insulin-like growth factor-binding protein complex acid labile | NLIAAVAPGAFGLK                     | 2 | 868.0351 | 2.572 | 0.334 |
| 32 | IPI00020996 | 1 | 33.4 | 0.76 | 0.07 | 38 | 25 | IGFALS Insulin-like growth factor-binding protein complex acid labile | n[145]WLDLSHNR                     | 2 | 592.8183 | 2.479 | 0.129 |
| 32 | IPI00020996 | 1 | 33.4 | 0.76 | 0.07 | 38 | 25 | IGFALS Insulin-like growth factor-binding protein complex acid labile | n[145]YLSLR                        | 2 | 398.2459 | 1.721 | 0.003 |
| 32 | IPI00020996 | 1 | 33.4 | 0.76 | 0.07 | 38 | 25 | IGFALS Insulin-like growth factor-binding protein complex acid labile | n[145]SLALGTFAH                    | 2 | 530.799  | 2.34  | 0.326 |
| 32 | IPI00020996 | 1 | 33.4 | 0.76 | 0.07 | 38 | 25 | IGFALS Insulin-like growth factor-binding protein complex acid labile | SFEGLGQLEVLTLDHNQLQEVK             | 3 | 926.4993 | 2.735 | 0.094 |
| 32 | IPI00020996 | 1 | 33.4 | 0.76 | 0.07 | 38 | 25 | IGFALS Insulin-like growth factor-binding protein complex acid labile | n[145]GLLEDTFPGLGLR                | 2 | 822.9757 | 2.346 | 0.313 |
| 33 | IPI00021364 | 1 | 8.7  | 0.67 | 0.03 | 4  | 4  | CFP Properdin precursor                                               | n[145]TCNHPVQHGPPFCAGDATR          | 4 | 576.003  | 4.95  | 0.553 |
| 33 | IPI00021364 | 1 | 8.7  | 0.67 | 0.03 | 4  | 4  | CFP Properdin precursor                                               | LCTPLLPK                           | 2 | 605.8562 | 2.091 | 0.172 |
| 33 | IPI00021364 | 1 | 8.7  | 0.67 | 0.03 | 4  | 4  | CFP Properdin precursor                                               | n[145]CSAPEPSQK[272]PPGK[272]      | 3 | 601.9868 | 3.122 | 0.286 |
| 33 | IPI00021364 | 1 | 8.7  | 0.67 | 0.03 | 4  | 4  | CFP Properdin precursor                                               | n[145]LCTPLLPK[272]                | 2 | 609.8633 | 1.873 | 0.162 |
| 34 | IPI00021727 | 1 | 47.6 | 0.68 | 0.11 | 95 | 56 | C4BPA C4b-binding protein alpha chain precursor                       | EEIIECDK                           | 2 | 734.3466 | 3.528 | 0.413 |
| 34 | IPI00021727 | 1 | 47.6 | 0.68 | 0.11 | 95 | 56 | C4BPA C4b-binding protein alpha chain precursor                       | GSSVIHCDADSK                       | 2 | 772.8635 | 4.45  | 0.38  |
| 34 | IPI00021727 | 1 | 47.6 | 0.68 | 0.11 | 95 | 56 | C4BPA C4b-binding protein alpha chain precursor                       | TPSCGDICNFPPK                      | 2 | 875.8928 | 3.534 | 0.503 |
| 34 | IPI00021727 | 1 | 47.6 | 0.68 | 0.11 | 95 | 56 | C4BPA C4b-binding protein alpha chain precursor                       | n[145]GSSVIHCDADSK[272]            | 2 | 776.8706 | 4.139 | 0.345 |
| 34 | IPI00021727 | 1 | 47.6 | 0.68 | 0.11 | 95 | 56 | C4BPA C4b-binding protein alpha chain precursor                       | n[145]GVGWSHPLPQCEIVK[272]         | 2 | 992.523  | 4.248 | 0.438 |
| 34 | IPI00021727 | 1 | 47.6 | 0.68 | 0.11 | 95 | 56 | C4BPA C4b-binding protein alpha chain precursor                       | n[145]GYILVGQAK[272]               | 2 | 618.8814 | 4.147 | 0.441 |
| 34 | IPI00021727 | 1 | 47.6 | 0.68 | 0.11 | 95 | 56 | C4BPA C4b-binding protein alpha chain precursor                       | n[145]SCSEGFFLIGSTTSR              | 2 | 891.4196 | 5.423 | 0.549 |
| 34 | IPI00021727 | 1 | 47.6 | 0.68 | 0.11 | 95 | 56 | C4BPA C4b-binding protein alpha chain precursor                       | CHPGYKPTTDEPTVICQK                 | 3 | 877.4248 | 4.368 | 0.434 |
| 34 | IPI00021727 | 1 | 47.6 | 0.68 | 0.11 | 95 | 56 | C4BPA C4b-binding protein alpha chain precursor                       | DVSHGEMVSGFGPIYNYK                 | 3 | 760.7088 | 5.668 | 0.58  |
| 34 | IPI00021727 | 1 | 47.6 | 0.68 | 0.11 | 95 | 56 | C4BPA C4b-binding protein alpha chain precursor                       | DVSHGEM[147]VSGFGPIYNYK            | 3 | 766.0404 | 5.439 | 0.44  |
| 34 | IPI00021727 | 1 | 47.6 | 0.68 | 0.11 | 95 | 56 | C4BPA C4b-binding protein alpha chain precursor                       | GSSVIHCDADSK                       | 3 | 515.5781 | 3.891 | 0.489 |
| 34 | IPI00021727 | 1 | 47.6 | 0.68 | 0.11 | 95 | 56 | C4BPA C4b-binding protein alpha chain precursor                       | KPDVSHGEMVSGFGPIYNYK               | 3 | 882.4564 | 6.119 | 0.564 |
| 34 | IPI00021727 | 1 | 47.6 | 0.68 | 0.11 | 95 | 56 | C4BPA C4b-binding protein alpha chain precursor                       | KPDVSHGEM[147]VSGFGPIYNYK          | 3 | 887.788  | 5.936 | 0.604 |
| 34 | IPI00021727 | 1 | 47.6 | 0.68 | 0.11 | 95 | 56 | C4BPA C4b-binding protein alpha chain precursor                       | n[145]CHPGYK[272]PTTDEPTVICQK[272] | 3 | 881.4319 | 4.489 | 0.448 |
| 34 | IPI00021727 | 1 | 47.6 | 0.68 | 0.11 | 95 | 56 | C4BPA C4b-binding protein alpha chain precursor                       | n[145]DVSHGEM[147]VSGFGPIYNYK[272] | 3 | 768.7118 | 6.325 | 0.505 |
| 34 | IPI00021727 | 1 | 47.6 | 0.68 | 0.11 | 95 | 56 | C4BPA C4b-binding protein alpha chain precursor                       | n[145]GSSVIHCDADSK[272]            | 3 | 518.2495 | 2.712 | 0.434 |
| 34 | IPI00021727 | 1 | 47.6 | 0.68 | 0.11 | 95 | 56 | C4BPA C4b-binding protein alpha chain precursor                       | n[145]GVGWSHPLPQCEIVK[272]         | 3 | 662.0177 | 4.488 | 0.444 |
| 34 | IPI00021727 | 1 | 47.6 | 0.68 | 0.11 | 95 | 56 | C4BPA C4b-binding protein alpha chain precursor                       | KPDVSHGEM[147]VSGFGPIYNYKDTIVFK    | 4 | 876.9642 | 3.731 | 0.449 |
| 34 | IPI00021727 | 1 | 47.6 | 0.68 | 0.11 | 95 | 56 | C4BPA C4b-binding protein alpha chain precursor                       | n[145]CHPGYK[272]PTTDEPTVICQK[272] | 4 | 661.3258 | 4.007 | 0.417 |

|    |             |   |      |      |      |     |    |                                                 |                                   |   |           |       |       |
|----|-------------|---|------|------|------|-----|----|-------------------------------------------------|-----------------------------------|---|-----------|-------|-------|
| 34 | IPI00021727 | 1 | 47.6 | 0.68 | 0.11 | 95  | 56 | C4BPA C4b-binding protein alpha chain precursor | GVGWSHPLPQCEIVK                   | 3 | 659.3463  | 3.691 | 0.318 |
| 34 | IPI00021727 | 1 | 47.6 | 0.68 | 0.11 | 95  | 56 | C4BPA C4b-binding protein alpha chain precursor | n[145]FK[272]TGTTLK[272]          | 3 | 443.2819  | 2.704 | 0.39  |
| 34 | IPI00021727 | 1 | 47.6 | 0.68 | 0.11 | 95  | 56 | C4BPA C4b-binding protein alpha chain precursor | n[145]LNNGEITQHR                  | 3 | 442.5729  | 2.472 | 0.041 |
| 34 | IPI00021727 | 1 | 47.6 | 0.68 | 0.11 | 95  | 56 | C4BPA C4b-binding protein alpha chain precursor | CHPGYKPTTDEPTTVICQK               | 4 | 658.3204  | 3.312 | 0.32  |
| 34 | IPI00021727 | 1 | 47.6 | 0.68 | 0.11 | 95  | 56 | C4BPA C4b-binding protein alpha chain precursor | KPDVSHGEMVSGFGPIYNYK              | 4 | 662.0941  | 3.151 | 0.302 |
| 34 | IPI00021727 | 1 | 47.6 | 0.68 | 0.11 | 95  | 56 | C4BPA C4b-binding protein alpha chain precursor | KPDVSHGEM[147]VSGFGPIYNYK         | 4 | 666.0928  | 3.009 | 0.138 |
| 34 | IPI00021727 | 1 | 47.6 | 0.68 | 0.11 | 95  | 56 | C4BPA C4b-binding protein alpha chain precursor | n[145]FSAICQGDGTWSPR              | 2 | 857.8935  | 4.031 | 0.374 |
| 34 | IPI00021727 | 1 | 47.6 | 0.68 | 0.11 | 95  | 56 | C4BPA C4b-binding protein alpha chain precursor | n[145]LNNGEITQHR                  | 2 | 663.3558  | 3.975 | 0.341 |
| 34 | IPI00021727 | 1 | 47.6 | 0.68 | 0.11 | 95  | 56 | C4BPA C4b-binding protein alpha chain precursor | n[145]LSLEIEQLELQR                | 2 | 807.9628  | 4.093 | 0.373 |
| 34 | IPI00021727 | 1 | 47.6 | 0.68 | 0.11 | 95  | 56 | C4BPA C4b-binding protein alpha chain precursor | n[145]TPSCGDICNFPPK[272]          | 2 | 879.8999  | 3.093 | 0.439 |
| 34 | IPI00021727 | 1 | 47.6 | 0.68 | 0.11 | 95  | 56 | C4BPA C4b-binding protein alpha chain precursor | n[145]YTCLPGYVR                   | 2 | 631.3131  | 2.08  | 0.232 |
| 34 | IPI00021727 | 1 | 47.6 | 0.68 | 0.11 | 95  | 56 | C4BPA C4b-binding protein alpha chain precursor | KPDVSHGEM[147]VSGFGPIYNYK         | 5 | 533.0757  | 2.532 | 0.223 |
| 34 | IPI00021727 | 1 | 47.6 | 0.68 | 0.11 | 95  | 56 | C4BPA C4b-binding protein alpha chain precursor | GYILVGQAK                         | 2 | 614.8743  | 2.969 | 0.267 |
| 34 | IPI00021727 | 1 | 47.6 | 0.68 | 0.11 | 95  | 56 | C4BPA C4b-binding protein alpha chain precursor | n[145]EDVYVVGTVLR                 | 2 | 697.394   | 3.25  | 0.32  |
| 34 | IPI00021727 | 1 | 47.6 | 0.68 | 0.11 | 95  | 56 | C4BPA C4b-binding protein alpha chain precursor | KPELVNGR                          | 3 | 398.2436  | 2.364 | 0.217 |
| 34 | IPI00021727 | 1 | 47.6 | 0.68 | 0.11 | 95  | 56 | C4BPA C4b-binding protein alpha chain precursor | n[145]EIIYECDK[272]               | 2 | 738.3537  | 3.194 | 0.272 |
| 34 | IPI00021727 | 1 | 47.6 | 0.68 | 0.11 | 95  | 56 | C4BPA C4b-binding protein alpha chain precursor | n[145]DTIVFK[272]                 | 2 | 505.8099  | 2.417 | 0.175 |
| 34 | IPI00021727 | 1 | 47.6 | 0.68 | 0.11 | 95  | 56 | C4BPA C4b-binding protein alpha chain precursor | n[145]DVSHGEMVSGFGPIYNYK[272]     | 3 | 763.3802  | 4.533 | 0.293 |
| 34 | IPI00021727 | 1 | 47.6 | 0.68 | 0.11 | 95  | 56 | C4BPA C4b-binding protein alpha chain precursor | n[145]VSHGEM[147]VSGFGPIYNYK[272] | 3 | 730.3695  | 5.011 | 0.367 |
| 34 | IPI00021727 | 1 | 47.6 | 0.68 | 0.11 | 95  | 56 | C4BPA C4b-binding protein alpha chain precursor | DTIVFK                            | 2 | 501.8028  | 2.182 | 0.177 |
| 34 | IPI00021727 | 1 | 47.6 | 0.68 | 0.11 | 95  | 56 | C4BPA C4b-binding protein alpha chain precursor | KPELVNGR                          | 2 | 596.8617  | 2.151 | 0.176 |
| 34 | IPI00021727 | 1 | 47.6 | 0.68 | 0.11 | 95  | 56 | C4BPA C4b-binding protein alpha chain precursor | IAHGHYK                           | 2 | 553.3169  | 2.015 | 0.165 |
| 34 | IPI00021727 | 1 | 47.6 | 0.68 | 0.11 | 95  | 56 | C4BPA C4b-binding protein alpha chain precursor | MALEVYK                           | 2 | 567.323   | 2.388 | 0.041 |
| 34 | IPI00021727 | 1 | 47.6 | 0.68 | 0.11 | 95  | 56 | C4BPA C4b-binding protein alpha chain precursor | n[145]GVGWSHPLPQCEIVK             | 2 | 990.5194  | 4.213 | 0.362 |
| 34 | IPI00021727 | 1 | 47.6 | 0.68 | 0.11 | 95  | 56 | C4BPA C4b-binding protein alpha chain precursor | NGQVEIK                           | 2 | 534.3141  | 2.045 | 0.085 |
| 34 | IPI00021727 | 1 | 47.6 | 0.68 | 0.11 | 95  | 56 | C4BPA C4b-binding protein alpha chain precursor | n[145]GVGWSHPLPQCEIVK             | 3 | 660.682   | 2.732 | 0.193 |
| 34 | IPI00021727 | 1 | 47.6 | 0.68 | 0.11 | 95  | 56 | C4BPA C4b-binding protein alpha chain precursor | n[145]NGQVEIK[272]                | 2 | 538.3212  | 2.27  | 0.031 |
| 34 | IPI00021727 | 1 | 47.6 | 0.68 | 0.11 | 95  | 56 | C4BPA C4b-binding protein alpha chain precursor | n[145]SCGDICNFPPK[272]            | 2 | 780.8497  | 2.781 | 0.303 |
| 34 | IPI00021727 | 1 | 47.6 | 0.68 | 0.11 | 95  | 56 | C4BPA C4b-binding protein alpha chain precursor | LNNGEITQHR                        | 3 | 441.2372  | 2.546 | 0.005 |
| 34 | IPI00021727 | 1 | 47.6 | 0.68 | 0.11 | 95  | 56 | C4BPA C4b-binding protein alpha chain precursor | n[145]CEVQDR                      | 2 | 470.2109  | 1.73  | 0.037 |
| 34 | IPI00021727 | 1 | 47.6 | 0.68 | 0.11 | 95  | 56 | C4BPA C4b-binding protein alpha chain precursor | FKTGTTLK                          | 3 | 439.2748  | 1.673 | 0.15  |
| 34 | IPI00021727 | 1 | 47.6 | 0.68 | 0.11 | 95  | 56 | C4BPA C4b-binding protein alpha chain precursor | n[145]WTPYQGCEALCCPEPK[272]       | 3 | 750.9857  | 2.182 | 0.007 |
| 34 | IPI00021727 | 1 | 47.6 | 0.68 | 0.11 | 95  | 56 | C4BPA C4b-binding protein alpha chain precursor | CKPPDIR                           | 3 | 417.8949  | 1.608 | 0.012 |
| 34 | IPI00021727 | 1 | 47.6 | 0.68 | 0.11 | 95  | 56 | C4BPA C4b-binding protein alpha chain precursor | n[145]YTCLPGYVR                   | 2 | 549.7815  | 2.102 | 0.175 |
| 34 | IPI00021727 | 1 | 47.6 | 0.68 | 0.11 | 95  | 56 | C4BPA C4b-binding protein alpha chain precursor | n[145]TPSCGDICNFPPK[272]          | 3 | 586.9357  | 1.955 | 0.044 |
| 34 | IPI00021727 | 1 | 47.6 | 0.68 | 0.11 | 95  | 56 | C4BPA C4b-binding protein alpha chain precursor | CCPEPK                            | 2 | 524.726   | 1.717 | 0.184 |
| 34 | IPI00021727 | 1 | 47.6 | 0.68 | 0.11 | 95  | 56 | C4BPA C4b-binding protein alpha chain precursor | n[145]PSPPTCEK[272]               | 2 | 596.8009  | 2.08  | 0.1   |
| 34 | IPI00021727 | 1 | 47.6 | 0.68 | 0.11 | 95  | 56 | C4BPA C4b-binding protein alpha chain precursor | n[145]FSLLGH                      | 2 | 409.2381  | 2.096 | 0.235 |
| 34 | IPI00021727 | 1 | 47.6 | 0.68 | 0.11 | 95  | 56 | C4BPA C4b-binding protein alpha chain precursor | n[145]LSCSYSH                     | 2 | 493.7132  | 1.811 | 0.056 |
| 34 | IPI00021727 | 1 | 47.6 | 0.68 | 0.11 | 95  | 56 | C4BPA C4b-binding protein alpha chain precursor | n[145]NCGPPPTLSFAAPM[147]DITLTETR | 3 | 846.7435  | 3.429 | 0.046 |
| 34 | IPI00021727 | 1 | 47.6 | 0.68 | 0.11 | 95  | 56 | C4BPA C4b-binding protein alpha chain precursor | LSCSYSH                           | 2 | 491.7097  | 1.663 | 0.063 |
| 34 | IPI00021727 | 1 | 47.6 | 0.68 | 0.11 | 95  | 56 | C4BPA C4b-binding protein alpha chain precursor | n[145]CCPEPK[272]                 | 2 | 528.7331  | 1.576 | 0.064 |
| 35 | IPI00021817 | 1 | 5.9  | 1.03 | 0.07 | 4   | 4  | PROC Vitamin K-dependent protein C precursor    | n[145]LGDDLLQCHPAVK[272]          | 3 | 581.6439  | 3.744 | 0.41  |
| 35 | IPI00021817 | 1 | 5.9  | 1.03 | 0.07 | 4   | 4  | PROC Vitamin K-dependent protein C precursor    | LGDDLLQCHPAVK                     | 2 | 867.9551  | 3.95  | 0.423 |
| 35 | IPI00021817 | 1 | 5.9  | 1.03 | 0.07 | 4   | 4  | PROC Vitamin K-dependent protein C precursor    | n[145]TFVLNFIK[272]               | 2 | 635.3941  | 3.399 | 0.303 |
| 35 | IPI00021817 | 1 | 5.9  | 1.03 | 0.07 | 4   | 4  | PROC Vitamin K-dependent protein C precursor    | TFVLNFIK                          | 2 | 631.387   | 2.215 | 0.123 |
| 35 | IPI00021817 | 1 | 5.9  | 1.03 | 0.07 | 4   | 4  | PROC Vitamin K-dependent protein C precursor    | SK[272]K[272]                     | 2 | 395.7731  | 0.913 | 0.136 |
| 36 | IPI00021841 | 1 | 85.4 | 0.95 | 0.11 | 976 | ## | APOA1 Apolipoprotein A-I precursor              | DLATVYVDVLK                       | 1 | 1515.8782 | 1.274 | 0.431 |

|    |             |   |      |      |      |     |    |                                    |                                   |   |           |       |       |
|----|-------------|---|------|------|------|-----|----|------------------------------------|-----------------------------------|---|-----------|-------|-------|
| 36 | IPI00021841 | 1 | 85.4 | 0.95 | 0.11 | 976 | ## | APOA1 Apolipoprotein A-I precursor | THLAPYSDELRL                      | 1 | 1441.7435 | 2.987 | 0.377 |
| 36 | IPI00021841 | 1 | 85.4 | 0.95 | 0.11 | 976 | ## | APOA1 Apolipoprotein A-I precursor | VSFLSALEEYTK                      | 1 | 1666.9051 | 3.441 | 0.516 |
| 36 | IPI00021841 | 1 | 85.4 | 0.95 | 0.11 | 976 | ## | APOA1 Apolipoprotein A-I precursor | n[145]THLAPYSDELRL                | 1 | 1445.7506 | 3.308 | 0.337 |
| 36 | IPI00021841 | 1 | 85.4 | 0.95 | 0.11 | 976 | ## | APOA1 Apolipoprotein A-I precursor | n[145]VQPYLDDFQK[272]             | 1 | 1540.8251 | 2.874 | 0.341 |
| 36 | IPI00021841 | 1 | 85.4 | 0.95 | 0.11 | 976 | ## | APOA1 Apolipoprotein A-I precursor | n[145]VSFLSALEEYTK[272]           | 1 | 1674.9193 | 0.942 | 0.228 |
| 36 | IPI00021841 | 1 | 85.4 | 0.95 | 0.11 | 976 | ## | APOA1 Apolipoprotein A-I precursor | ATEHLSTLSEK                       | 2 | 748.4094  | 3.301 | 0.318 |
| 36 | IPI00021841 | 1 | 85.4 | 0.95 | 0.11 | 976 | ## | APOA1 Apolipoprotein A-I precursor | DLATVYVDVLK                       | 2 | 758.4427  | 3.576 | 0.51  |
| 36 | IPI00021841 | 1 | 85.4 | 0.95 | 0.11 | 976 | ## | APOA1 Apolipoprotein A-I precursor | DSGRDYVSQFEGSALGK                 | 2 | 1048.524  | 5.284 | 0.412 |
| 36 | IPI00021841 | 1 | 85.4 | 0.95 | 0.11 | 976 | ## | APOA1 Apolipoprotein A-I precursor | DYVSQFEGSALGK                     | 2 | 840.9333  | 5.288 | 0.467 |
| 36 | IPI00021841 | 1 | 85.4 | 0.95 | 0.11 | 976 | ## | APOA1 Apolipoprotein A-I precursor | EQLGPVTQEFWDNLEK                  | 2 | 1107.0655 | 5.359 | 0.407 |
| 36 | IPI00021841 | 1 | 85.4 | 0.95 | 0.11 | 976 | ## | APOA1 Apolipoprotein A-I precursor | EQLGPVTQEFWDNLEK[272]             | 2 | 1109.0691 | 4.67  | 0.428 |
| 36 | IPI00021841 | 1 | 85.4 | 0.95 | 0.11 | 976 | ## | APOA1 Apolipoprotein A-I precursor | LLDNWDSVTSTFSK                    | 2 | 946.9913  | 3.275 | 0.313 |
| 36 | IPI00021841 | 1 | 85.4 | 0.95 | 0.11 | 976 | ## | APOA1 Apolipoprotein A-I precursor | QGLLPVLESFK                       | 2 | 755.9533  | 2.621 | 0.377 |
| 36 | IPI00021841 | 1 | 85.4 | 0.95 | 0.11 | 976 | ## | APOA1 Apolipoprotein A-I precursor | VKDLATVYVDVLK                     | 2 | 942.0719  | 3.956 | 0.415 |
| 36 | IPI00021841 | 1 | 85.4 | 0.95 | 0.11 | 976 | ## | APOA1 Apolipoprotein A-I precursor | VQPYLDDFQK                        | 2 | 766.9091  | 1.92  | 0.127 |
| 36 | IPI00021841 | 1 | 85.4 | 0.95 | 0.11 | 976 | ## | APOA1 Apolipoprotein A-I precursor | VQPYLDDFQKK                       | 2 | 901.004   | 4.246 | 0.478 |
| 36 | IPI00021841 | 1 | 85.4 | 0.95 | 0.11 | 976 | ## | APOA1 Apolipoprotein A-I precursor | VSFLSALEEYTK                      | 2 | 833.9562  | 3.643 | 0.412 |
| 36 | IPI00021841 | 1 | 85.4 | 0.95 | 0.11 | 976 | ## | APOA1 Apolipoprotein A-I precursor | VSFLSALEEYTKK                     | 2 | 968.0512  | 5.008 | 0.392 |
| 36 | IPI00021841 | 1 | 85.4 | 0.95 | 0.11 | 976 | ## | APOA1 Apolipoprotein A-I precursor | n[145]ATEHLSTLSEK[272]            | 2 | 752.4165  | 3.43  | 0.306 |
| 36 | IPI00021841 | 1 | 85.4 | 0.95 | 0.11 | 976 | ## | APOA1 Apolipoprotein A-I precursor | n[145]DLATVYVDVLK[272]            | 2 | 762.4498  | 4.392 | 0.474 |
| 36 | IPI00021841 | 1 | 85.4 | 0.95 | 0.11 | 976 | ## | APOA1 Apolipoprotein A-I precursor | n[145]DSGRDYVSQFEGSALGK[272]      | 2 | 1052.5311 | 5.166 | 0.429 |
| 36 | IPI00021841 | 1 | 85.4 | 0.95 | 0.11 | 976 | ## | APOA1 Apolipoprotein A-I precursor | n[145]DYVSQFEGSALGK[272]          | 2 | 844.9404  | 4.879 | 0.471 |
| 36 | IPI00021841 | 1 | 85.4 | 0.95 | 0.11 | 976 | ## | APOA1 Apolipoprotein A-I precursor | n[145]EQLGPVTQEFWDNLEK[272]       | 2 | 1111.0726 | 4.041 | 0.488 |
| 36 | IPI00021841 | 1 | 85.4 | 0.95 | 0.11 | 976 | ## | APOA1 Apolipoprotein A-I precursor | n[145]LLDNWDSVTSTFSK[272]         | 2 | 950.9984  | 3.962 | 0.421 |
| 36 | IPI00021841 | 1 | 85.4 | 0.95 | 0.11 | 976 | ## | APOA1 Apolipoprotein A-I precursor | n[145]VK[272]DLATVYVDVLK[272]     | 2 | 948.0826  | 4.264 | 0.41  |
| 36 | IPI00021841 | 1 | 85.4 | 0.95 | 0.11 | 976 | ## | APOA1 Apolipoprotein A-I precursor | n[145]VQPYLDDFQK[272]             | 2 | 770.9162  | 2.954 | 0.163 |
| 36 | IPI00021841 | 1 | 85.4 | 0.95 | 0.11 | 976 | ## | APOA1 Apolipoprotein A-I precursor | n[145]VQPYLDDFQK[272]K[272]       | 2 | 907.0147  | 4.123 | 0.432 |
| 36 | IPI00021841 | 1 | 85.4 | 0.95 | 0.11 | 976 | ## | APOA1 Apolipoprotein A-I precursor | n[145]VSFLSALEEYTK[272]           | 2 | 837.9633  | 4.141 | 0.497 |
| 36 | IPI00021841 | 1 | 85.4 | 0.95 | 0.11 | 976 | ## | APOA1 Apolipoprotein A-I precursor | n[145]VSFLSALEEYTK[272]K[272]     | 2 | 974.0618  | 5.4   | 0.437 |
| 36 | IPI00021841 | 1 | 85.4 | 0.95 | 0.11 | 976 | ## | APOA1 Apolipoprotein A-I precursor | n[145]YVSQFEGSALGK[272]           | 2 | 787.4269  | 4.445 | 0.469 |
| 36 | IPI00021841 | 1 | 85.4 | 0.95 | 0.11 | 976 | ## | APOA1 Apolipoprotein A-I precursor | DLATVYVDVLKDSGR                   | 3 | 644.3581  | 4.205 | 0.418 |
| 36 | IPI00021841 | 1 | 85.4 | 0.95 | 0.11 | 976 | ## | APOA1 Apolipoprotein A-I precursor | DSGRDYVSQFEGSALGK                 | 3 | 699.3518  | 4.579 | 0.467 |
| 36 | IPI00021841 | 1 | 85.4 | 0.95 | 0.11 | 976 | ## | APOA1 Apolipoprotein A-I precursor | EQLGPVTQEFWDNLEK                  | 3 | 738.3794  | 5.921 | 0.543 |
| 36 | IPI00021841 | 1 | 85.4 | 0.95 | 0.11 | 976 | ## | APOA1 Apolipoprotein A-I precursor | EQLGPVTQEFWDNLEKETEGLR            | 3 | 966.8259  | 5.659 | 0.603 |
| 36 | IPI00021841 | 1 | 85.4 | 0.95 | 0.11 | 976 | ## | APOA1 Apolipoprotein A-I precursor | KWQEEMELYR                        | 3 | 564.624   | 3.375 | 0.342 |
| 36 | IPI00021841 | 1 | 85.4 | 0.95 | 0.11 | 976 | ## | APOA1 Apolipoprotein A-I precursor | LAEYHAKATEHLSTLSEK                | 3 | 816.7797  | 4.611 | 0.501 |
| 36 | IPI00021841 | 1 | 85.4 | 0.95 | 0.11 | 976 | ## | APOA1 Apolipoprotein A-I precursor | LREQLGPVTQEFWDNLEK                | 3 | 828.1078  | 5.508 | 0.437 |
| 36 | IPI00021841 | 1 | 85.4 | 0.95 | 0.11 | 976 | ## | APOA1 Apolipoprotein A-I precursor | VEPLRAELQEGAR                     | 3 | 536.6336  | 3.635 | 0.533 |
| 36 | IPI00021841 | 1 | 85.4 | 0.95 | 0.11 | 976 | ## | APOA1 Apolipoprotein A-I precursor | VKDLATVYVDVLK                     | 3 | 628.3837  | 3.692 | 0.436 |
| 36 | IPI00021841 | 1 | 85.4 | 0.95 | 0.11 | 976 | ## | APOA1 Apolipoprotein A-I precursor | VKDLATVYVDVLKDSGR                 | 3 | 766.7775  | 4.964 | 0.611 |
| 36 | IPI00021841 | 1 | 85.4 | 0.95 | 0.11 | 976 | ## | APOA1 Apolipoprotein A-I precursor | VSFLSALEEYTKK                     | 3 | 645.7032  | 3.854 | 0.345 |
| 36 | IPI00021841 | 1 | 85.4 | 0.95 | 0.11 | 976 | ## | APOA1 Apolipoprotein A-I precursor | n[145]DLATVYVDVLK[272]DSGR        | 3 | 647.0295  | 4.004 | 0.436 |
| 36 | IPI00021841 | 1 | 85.4 | 0.95 | 0.11 | 976 | ## | APOA1 Apolipoprotein A-I precursor | n[145]DSGRDYVSQFEGSALGK[272]      | 3 | 702.0232  | 6.193 | 0.501 |
| 36 | IPI00021841 | 1 | 85.4 | 0.95 | 0.11 | 976 | ## | APOA1 Apolipoprotein A-I precursor | n[145]EQLGPVTQEFWDNLEK[272]       | 3 | 741.0508  | 5.75  | 0.5   |
| 36 | IPI00021841 | 1 | 85.4 | 0.95 | 0.11 | 976 | ## | APOA1 Apolipoprotein A-I precursor | n[145]EQLGPVTQEFWDNLEK[272]ETEGLR | 3 | 969.4973  | 5.738 | 0.591 |
| 36 | IPI00021841 | 1 | 85.4 | 0.95 | 0.11 | 976 | ## | APOA1 Apolipoprotein A-I precursor | n[145]LREQLGPVTQEFWDNLEK[272]     | 3 | 830.7792  | 5.473 | 0.427 |
| 36 | IPI00021841 | 1 | 85.4 | 0.95 | 0.11 | 976 | ## | APOA1 Apolipoprotein A-I precursor | n[145]VK[272]DLATVYVDVLK[272]     | 3 | 632.3908  | 2.321 | 0.248 |
| 36 | IPI00021841 | 1 | 85.4 | 0.95 | 0.11 | 976 | ## | APOA1 Apolipoprotein A-I precursor | n[145]VK[272]DLATVYVDVLK[272]DSGR | 3 | 770.7846  | 5.374 | 0.51  |

|    |             |   |      |      |      |     |    |                                    |                                              |   |           |       |       |
|----|-------------|---|------|------|------|-----|----|------------------------------------|----------------------------------------------|---|-----------|-------|-------|
| 36 | IPI00021841 | 1 | 85.4 | 0.95 | 0.11 | 976 | ## | APOA1 Apolipoprotein A-I precursor | n[145]VQPYLDDFQK[272]K[272]                  | 3 | 605.0122  | 2.011 | 0.131 |
| 36 | IPI00021841 | 1 | 85.4 | 0.95 | 0.11 | 976 | ## | APOA1 Apolipoprotein A-I precursor | n[145]VSFLSALEEYTK[272]K[272]                | 3 | 649.7103  | 5.497 | 0.498 |
| 36 | IPI00021841 | 1 | 85.4 | 0.95 | 0.11 | 976 | ## | APOA1 Apolipoprotein A-I precursor | DLATVYVDVLKDSGRDYVSQFEGSALGK                 | 4 | 863.957   | 4.404 | 0.523 |
| 36 | IPI00021841 | 1 | 85.4 | 0.95 | 0.11 | 976 | ## | APOA1 Apolipoprotein A-I precursor | LREQLGPVTQEFWDNLEKETEGLR                     | 4 | 792.6676  | 5.487 | 0.606 |
| 36 | IPI00021841 | 1 | 85.4 | 0.95 | 0.11 | 976 | ## | APOA1 Apolipoprotein A-I precursor | VKDLATVYVDVLKDSGR                            | 4 | 575.335   | 3.217 | 0.321 |
| 36 | IPI00021841 | 1 | 85.4 | 0.95 | 0.11 | 976 | ## | APOA1 Apolipoprotein A-I precursor | n[145]LREQLGPVTQEFWDNLEK[272]ETEGLR          | 4 | 794.6711  | 5.988 | 0.534 |
| 36 | IPI00021841 | 1 | 85.4 | 0.95 | 0.11 | 976 | ## | APOA1 Apolipoprotein A-I precursor | AHVDALR                                      | 3 | 307.847   | 2.743 | 0.277 |
| 36 | IPI00021841 | 1 | 85.4 | 0.95 | 0.11 | 976 | ## | APOA1 Apolipoprotein A-I precursor | KWQEEM[147]ELYR                              | 3 | 569.9556  | 2.683 | 0.335 |
| 36 | IPI00021841 | 1 | 85.4 | 0.95 | 0.11 | 976 | ## | APOA1 Apolipoprotein A-I precursor | LAEYHAK                                      | 3 | 371.2135  | 1.727 | 0.142 |
| 36 | IPI00021841 | 1 | 85.4 | 0.95 | 0.11 | 976 | ## | APOA1 Apolipoprotein A-I precursor | THLAPYSDELR                                  | 3 | 481.2527  | 3.152 | 0.3   |
| 36 | IPI00021841 | 1 | 85.4 | 0.95 | 0.11 | 976 | ## | APOA1 Apolipoprotein A-I precursor | THLAPYSDELQR                                 | 3 | 575.9726  | 3.04  | 0.353 |
| 36 | IPI00021841 | 1 | 85.4 | 0.95 | 0.11 | 976 | ## | APOA1 Apolipoprotein A-I precursor | VQPYLDDFQKK                                  | 3 | 601.0051  | 3.022 | 0.151 |
| 36 | IPI00021841 | 1 | 85.4 | 0.95 | 0.11 | 976 | ## | APOA1 Apolipoprotein A-I precursor | n[145]AHVDALR                                | 3 | 309.1827  | 2.638 | 0.24  |
| 36 | IPI00021841 | 1 | 85.4 | 0.95 | 0.11 | 976 | ## | APOA1 Apolipoprotein A-I precursor | n[145]AK[272]VQPYLDDFQK[272]K[272]           | 3 | 719.4236  | 3.511 | 0.367 |
| 36 | IPI00021841 | 1 | 85.4 | 0.95 | 0.11 | 976 | ## | APOA1 Apolipoprotein A-I precursor | n[145]LAEYHAK[272]                           | 3 | 373.8849  | 2.497 | 0.262 |
| 36 | IPI00021841 | 1 | 85.4 | 0.95 | 0.11 | 976 | ## | APOA1 Apolipoprotein A-I precursor | n[145]QGLLPVLESFK[272]                       | 3 | 506.976   | 3.11  | 0.29  |
| 36 | IPI00021841 | 1 | 85.4 | 0.95 | 0.11 | 976 | ## | APOA1 Apolipoprotein A-I precursor | n[145]QK[272]LHELQEK[272]                    | 3 | 528.986   | 3.602 | 0.301 |
| 36 | IPI00021841 | 1 | 85.4 | 0.95 | 0.11 | 976 | ## | APOA1 Apolipoprotein A-I precursor | VSFLSALEEYTKK                                | 4 | 484.5292  | 3.755 | 0.313 |
| 36 | IPI00021841 | 1 | 85.4 | 0.95 | 0.11 | 976 | ## | APOA1 Apolipoprotein A-I precursor | n[145]AK[272]VQPYLDDFQK[272]K[272]           | 4 | 539.8195  | 3.226 | 0.411 |
| 36 | IPI00021841 | 1 | 85.4 | 0.95 | 0.11 | 976 | ## | APOA1 Apolipoprotein A-I precursor | n[145]DLATVYVDVLK[272]DSGRDYVSQFEGSALGK[272] | 4 | 866.9623  | 4.971 | 0.37  |
| 36 | IPI00021841 | 1 | 85.4 | 0.95 | 0.11 | 976 | ## | APOA1 Apolipoprotein A-I precursor | n[145]EQLGPVTQEFWDNLEK[272]ETEGLRQEMSK[272]  | 4 | 914.2175  | 4.184 | 0.425 |
| 36 | IPI00021841 | 1 | 85.4 | 0.95 | 0.11 | 976 | ## | APOA1 Apolipoprotein A-I precursor | n[145]VK[272]DLATVYVDVLK[272]DSGR            | 4 | 578.3403  | 2.054 | 0.087 |
| 36 | IPI00021841 | 1 | 85.4 | 0.95 | 0.11 | 976 | ## | APOA1 Apolipoprotein A-I precursor | THLAPYSDELR                                  | 2 | 721.3754  | 3.292 | 0.287 |
| 36 | IPI00021841 | 1 | 85.4 | 0.95 | 0.11 | 976 | ## | APOA1 Apolipoprotein A-I precursor | n[145]QGLLPVLESFK[272]                       | 2 | 759.9604  | 2.635 | 0.255 |
| 36 | IPI00021841 | 1 | 85.4 | 0.95 | 0.11 | 976 | ## | APOA1 Apolipoprotein A-I precursor | AKPALEDLR                                    | 3 | 431.5944  | 1.77  | 0.125 |
| 36 | IPI00021841 | 1 | 85.4 | 0.95 | 0.11 | 976 | ## | APOA1 Apolipoprotein A-I precursor | QKLHELQEK                                    | 3 | 524.9789  | 3.038 | 0.158 |
| 36 | IPI00021841 | 1 | 85.4 | 0.95 | 0.11 | 976 | ## | APOA1 Apolipoprotein A-I precursor | n[145]VSFLSALEEYTK[272]                      | 3 | 558.9779  | 2.041 | 0.043 |
| 36 | IPI00021841 | 1 | 85.4 | 0.95 | 0.11 | 976 | ## | APOA1 Apolipoprotein A-I precursor | AKVQPYLDDFQKK                                | 4 | 535.8124  | 2.143 | 0.289 |
| 36 | IPI00021841 | 1 | 85.4 | 0.95 | 0.11 | 976 | ## | APOA1 Apolipoprotein A-I precursor | AELQEGAR                                     | 2 | 507.2724  | 3.094 | 0.227 |
| 36 | IPI00021841 | 1 | 85.4 | 0.95 | 0.11 | 976 | ## | APOA1 Apolipoprotein A-I precursor | AKPALEDLR                                    | 2 | 646.8879  | 3.054 | 0.362 |
| 36 | IPI00021841 | 1 | 85.4 | 0.95 | 0.11 | 976 | ## | APOA1 Apolipoprotein A-I precursor | LAEYHAK                                      | 2 | 556.3166  | 1.809 | 0.12  |
| 36 | IPI00021841 | 1 | 85.4 | 0.95 | 0.11 | 976 | ## | APOA1 Apolipoprotein A-I precursor | n[145]LSPLGEEMR                              | 2 | 588.3142  | 2.003 | 0.024 |
| 36 | IPI00021841 | 1 | 85.4 | 0.95 | 0.11 | 976 | ## | APOA1 Apolipoprotein A-I precursor | AKVQPYLDDFQKK                                | 3 | 714.0808  | 3.742 | 0.331 |
| 36 | IPI00021841 | 1 | 85.4 | 0.95 | 0.11 | 976 | ## | APOA1 Apolipoprotein A-I precursor | QKVEPLRAELQEGAR                              | 4 | 501.7892  | 2.259 | 0.321 |
| 36 | IPI00021841 | 1 | 85.4 | 0.95 | 0.11 | 976 | ## | APOA1 Apolipoprotein A-I precursor | ATEHLSTLSEK                                  | 1 | 1495.8116 | 2.81  | 0.32  |
| 36 | IPI00021841 | 1 | 85.4 | 0.95 | 0.11 | 976 | ## | APOA1 Apolipoprotein A-I precursor | VQPYLDDFQK                                   | 1 | 1532.8109 | 2.565 | 0.33  |
| 36 | IPI00021841 | 1 | 85.4 | 0.95 | 0.11 | 976 | ## | APOA1 Apolipoprotein A-I precursor | n[145]LSPLGEEMR                              | 1 | 1175.6211 | 2.859 | 0.282 |
| 36 | IPI00021841 | 1 | 85.4 | 0.95 | 0.11 | 976 | ## | APOA1 Apolipoprotein A-I precursor | LSPLGEEMR                                    | 2 | 586.3106  | 3.08  | 0.347 |
| 36 | IPI00021841 | 1 | 85.4 | 0.95 | 0.11 | 976 | ## | APOA1 Apolipoprotein A-I precursor | WQEEMELYR                                    | 2 | 712.3374  | 2.209 | 0.448 |
| 36 | IPI00021841 | 1 | 85.4 | 0.95 | 0.11 | 976 | ## | APOA1 Apolipoprotein A-I precursor | n[145]AELQEGAR                               | 2 | 509.2759  | 3.27  | 0.26  |
| 36 | IPI00021841 | 1 | 85.4 | 0.95 | 0.11 | 976 | ## | APOA1 Apolipoprotein A-I precursor | n[145]LAEYHAK[272]                           | 2 | 560.3237  | 2.878 | 0.242 |
| 36 | IPI00021841 | 1 | 85.4 | 0.95 | 0.11 | 976 | ## | APOA1 Apolipoprotein A-I precursor | ATEHLSTLSEK                                  | 3 | 499.2754  | 2.434 | 0.092 |
| 36 | IPI00021841 | 1 | 85.4 | 0.95 | 0.11 | 976 | ## | APOA1 Apolipoprotein A-I precursor | QGLLPVLESFK                                  | 3 | 504.3046  | 3.134 | 0.078 |
| 36 | IPI00021841 | 1 | 85.4 | 0.95 | 0.11 | 976 | ## | APOA1 Apolipoprotein A-I precursor | n[145]LHELQEK[272]                           | 3 | 395.5674  | 2.438 | 0.083 |
| 36 | IPI00021841 | 1 | 85.4 | 0.95 | 0.11 | 976 | ## | APOA1 Apolipoprotein A-I precursor | LSPLGEEMR                                    | 1 | 1171.614  | 2.885 | 0.254 |
| 36 | IPI00021841 | 1 | 85.4 | 0.95 | 0.11 | 976 | ## | APOA1 Apolipoprotein A-I precursor | n[145]AK[272]PALEDLR                         | 1 | 1300.7828 | 2.561 | 0.303 |
| 36 | IPI00021841 | 1 | 85.4 | 0.95 | 0.11 | 976 | ## | APOA1 Apolipoprotein A-I precursor | n[145]ATEHLSTLSEK[272]                       | 1 | 1503.8258 | 2.904 | 0.31  |
| 36 | IPI00021841 | 1 | 85.4 | 0.95 | 0.11 | 976 | ## | APOA1 Apolipoprotein A-I precursor | n[145]DLATVYVDVLK[272]                       | 1 | 1523.8924 | 2.304 | 0.492 |

|    |             |   |      |      |      |     |    |                                    |                                    |   |           |       |       |
|----|-------------|---|------|------|------|-----|----|------------------------------------|------------------------------------|---|-----------|-------|-------|
| 36 | IPI00021841 | 1 | 85.4 | 0.95 | 0.11 | 976 | ## | APOA1 Apolipoprotein A-I precursor | n[145]LHELQEK[272]                 | 1 | 1184.6878 | 2.564 | 0.142 |
| 36 | IPI00021841 | 1 | 85.4 | 0.95 | 0.11 | 976 | ## | APOA1 Apolipoprotein A-I precursor | LSPLGEEM[147]R                     | 2 | 594.3081  | 2.484 | 0.379 |
| 36 | IPI00021841 | 1 | 85.4 | 0.95 | 0.11 | 976 | ## | APOA1 Apolipoprotein A-I precursor | WQEEM[147]ELYR                     | 2 | 720.3348  | 2.763 | 0.24  |
| 36 | IPI00021841 | 1 | 85.4 | 0.95 | 0.11 | 976 | ## | APOA1 Apolipoprotein A-I precursor | n[145]LSPLGEEM[147]R               | 2 | 596.3116  | 2.31  | 0.16  |
| 36 | IPI00021841 | 1 | 85.4 | 0.95 | 0.11 | 976 | ## | APOA1 Apolipoprotein A-I precursor | n[145]AK[272]PALEDLR               | 3 | 434.2658  | 2.16  | 0.177 |
| 36 | IPI00021841 | 1 | 85.4 | 0.95 | 0.11 | 976 | ## | APOA1 Apolipoprotein A-I precursor | n[145]QK[272]VEPLRAELQEGAR         | 4 | 503.7928  | 2.728 | 0.109 |
| 36 | IPI00021841 | 1 | 85.4 | 0.95 | 0.11 | 976 | ## | APOA1 Apolipoprotein A-I precursor | AKPALEDLR                          | 1 | 1292.7686 | 2.347 | 0.245 |
| 36 | IPI00021841 | 1 | 85.4 | 0.95 | 0.11 | 976 | ## | APOA1 Apolipoprotein A-I precursor | LAEYHAK                            | 1 | 1111.626  | 2.577 | 0.272 |
| 36 | IPI00021841 | 1 | 85.4 | 0.95 | 0.11 | 976 | ## | APOA1 Apolipoprotein A-I precursor | AHVDALR                            | 2 | 461.2669  | 2.058 | 0.129 |
| 36 | IPI00021841 | 1 | 85.4 | 0.95 | 0.11 | 976 | ## | APOA1 Apolipoprotein A-I precursor | QKVEPLRAELQEGAR                    | 3 | 668.7165  | 2.687 | 0.31  |
| 36 | IPI00021841 | 1 | 85.4 | 0.95 | 0.11 | 976 | ## | APOA1 Apolipoprotein A-I precursor | n[145]ATEHLSTLSEK[272]             | 3 | 501.9468  | 2.952 | 0.163 |
| 36 | IPI00021841 | 1 | 85.4 | 0.95 | 0.11 | 976 | ## | APOA1 Apolipoprotein A-I precursor | LHELQEK                            | 1 | 1176.6736 | 2.468 | 0.133 |
| 36 | IPI00021841 | 1 | 85.4 | 0.95 | 0.11 | 976 | ## | APOA1 Apolipoprotein A-I precursor | n[145]THLAPYSDELRL                 | 2 | 723.3789  | 3.166 | 0.158 |
| 36 | IPI00021841 | 1 | 85.4 | 0.95 | 0.11 | 976 | ## | APOA1 Apolipoprotein A-I precursor | n[145]THLAPYSDELRL                 | 3 | 482.5884  | 1.603 | 0.091 |
| 36 | IPI00021841 | 1 | 85.4 | 0.95 | 0.11 | 976 | ## | APOA1 Apolipoprotein A-I precursor | AHVDALR                            | 1 | 921.5265  | 2.217 | 0.148 |
| 36 | IPI00021841 | 1 | 85.4 | 0.95 | 0.11 | 976 | ## | APOA1 Apolipoprotein A-I precursor | n[145]AK[272]PALEDLR               | 2 | 650.895   | 2.245 | 0.281 |
| 36 | IPI00021841 | 1 | 85.4 | 0.95 | 0.11 | 976 | ## | APOA1 Apolipoprotein A-I precursor | n[145]QK[272]VEPLRAELQEGAR         | 3 | 671.3879  | 3.136 | 0.242 |
| 36 | IPI00021841 | 1 | 85.4 | 0.95 | 0.11 | 976 | ## | APOA1 Apolipoprotein A-I precursor | EQLGPVTQEFWDNLEKETEGLRQEMSK        | 4 | 911.2122  | 4.249 | 0.34  |
| 36 | IPI00021841 | 1 | 85.4 | 0.95 | 0.11 | 976 | ## | APOA1 Apolipoprotein A-I precursor | n[145]AHVDALR                      | 1 | 925.5336  | 2.202 | 0.174 |
| 36 | IPI00021841 | 1 | 85.4 | 0.95 | 0.11 | 976 | ## | APOA1 Apolipoprotein A-I precursor | n[145]LHELQEK[272]                 | 2 | 592.8475  | 2.486 | 0.1   |
| 36 | IPI00021841 | 1 | 85.4 | 0.95 | 0.11 | 976 | ## | APOA1 Apolipoprotein A-I precursor | n[145]ETEGLRQEMSK[272]             | 2 | 798.4187  | 3.919 | 0.371 |
| 36 | IPI00021841 | 1 | 85.4 | 0.95 | 0.11 | 976 | ## | APOA1 Apolipoprotein A-I precursor | ETEGLRQEMSK                        | 2 | 794.4116  | 3.701 | 0.38  |
| 36 | IPI00021841 | 1 | 85.4 | 0.95 | 0.11 | 976 | ## | APOA1 Apolipoprotein A-I precursor | n[145]AHVDALR                      | 2 | 463.2704  | 2.024 | 0.276 |
| 36 | IPI00021841 | 1 | 85.4 | 0.95 | 0.11 | 976 | ## | APOA1 Apolipoprotein A-I precursor | n[145]LEALK[272]JENGGAR            | 2 | 723.4194  | 3.685 | 0.396 |
| 36 | IPI00021841 | 1 | 85.4 | 0.95 | 0.11 | 976 | ## | APOA1 Apolipoprotein A-I precursor | LREQLGPVTQEFWDNLEK[272]ETEGLR      | 4 | 793.6694  | 3.696 | 0.254 |
| 36 | IPI00021841 | 1 | 85.4 | 0.95 | 0.11 | 976 | ## | APOA1 Apolipoprotein A-I precursor | LHELQEK                            | 2 | 588.8404  | 1.894 | 0.105 |
| 36 | IPI00021841 | 1 | 85.4 | 0.95 | 0.11 | 976 | ## | APOA1 Apolipoprotein A-I precursor | THLAPYSDELRLR                      | 2 | 863.4552  | 3.986 | 0.349 |
| 36 | IPI00021841 | 1 | 85.4 | 0.95 | 0.11 | 976 | ## | APOA1 Apolipoprotein A-I precursor | n[145]DIEEVK[272]                  | 1 | 1020.5816 | 2.261 | 0.111 |
| 36 | IPI00021841 | 1 | 85.4 | 0.95 | 0.11 | 976 | ## | APOA1 Apolipoprotein A-I precursor | LREQLGPVTQEFWDNLEK[272]            | 3 | 829.4435  | 3.576 | 0.327 |
| 36 | IPI00021841 | 1 | 85.4 | 0.95 | 0.11 | 976 | ## | APOA1 Apolipoprotein A-I precursor | DIEEVK                             | 1 | 1012.5674 | 2.152 | 0.113 |
| 36 | IPI00021841 | 1 | 85.4 | 0.95 | 0.11 | 976 | ## | APOA1 Apolipoprotein A-I precursor | n[145]WQEEM[147]ELYR               | 2 | 722.3384  | 2.269 | 0.325 |
| 36 | IPI00021841 | 1 | 85.4 | 0.95 | 0.11 | 976 | ## | APOA1 Apolipoprotein A-I precursor | n[145]LEALK[272]JENGGAR            | 3 | 482.6153  | 3.44  | 0.17  |
| 36 | IPI00021841 | 1 | 85.4 | 0.95 | 0.11 | 976 | ## | APOA1 Apolipoprotein A-I precursor | ETEGLRQEM[147]SKDLEEVK             | 4 | 615.0718  | 2.183 | 0.253 |
| 36 | IPI00021841 | 1 | 85.4 | 0.95 | 0.11 | 976 | ## | APOA1 Apolipoprotein A-I precursor | QKVEPLRAELQEGAR                    | 2 | 1002.5711 | 3.772 | 0.365 |
| 36 | IPI00021841 | 1 | 85.4 | 0.95 | 0.11 | 976 | ## | APOA1 Apolipoprotein A-I precursor | n[145]LAEYHAK[272]ATEHLSTLSEK[272] | 4 | 615.842   | 2.706 | 0.173 |
| 36 | IPI00021841 | 1 | 85.4 | 0.95 | 0.11 | 976 | ## | APOA1 Apolipoprotein A-I precursor | QKVEPLR                            | 1 | 1149.7104 | 2.291 | 0.152 |
| 36 | IPI00021841 | 1 | 85.4 | 0.95 | 0.11 | 976 | ## | APOA1 Apolipoprotein A-I precursor | n[145]QK[272]VEPLR                 | 1 | 1157.7246 | 2.187 | 0.156 |
| 36 | IPI00021841 | 1 | 85.4 | 0.95 | 0.11 | 976 | ## | APOA1 Apolipoprotein A-I precursor | n[145]LLDNWDSVTSTFSKLR             | 3 | 722.7274  | 2.924 | 0.22  |
| 36 | IPI00021841 | 1 | 85.4 | 0.95 | 0.11 | 976 | ## | APOA1 Apolipoprotein A-I precursor | n[145]ETEGLRQEM[147]SK[272]        | 2 | 806.4162  | 3.031 | 0.377 |
| 36 | IPI00021841 | 1 | 85.4 | 0.95 | 0.11 | 976 | ## | APOA1 Apolipoprotein A-I precursor | LEALKENGGAR                        | 3 | 479.9439  | 2.421 | 0.22  |
| 36 | IPI00021841 | 1 | 85.4 | 0.95 | 0.11 | 976 | ## | APOA1 Apolipoprotein A-I precursor | EQLGPVTQEFWDNLEK[272]              | 3 | 739.7151  | 3.81  | 0.246 |
| 36 | IPI00021841 | 1 | 85.4 | 0.95 | 0.11 | 976 | ## | APOA1 Apolipoprotein A-I precursor | n[145]QEMSK[272]DLEEVK[272]        | 3 | 589.989   | 3.249 | 0.194 |
| 36 | IPI00021841 | 1 | 85.4 | 0.95 | 0.11 | 976 | ## | APOA1 Apolipoprotein A-I precursor | VSFLSALLEEYTK                      | 3 | 556.3065  | 2.172 | 0.2   |
| 36 | IPI00021841 | 1 | 85.4 | 0.95 | 0.11 | 976 | ## | APOA1 Apolipoprotein A-I precursor | n[145]LEALK[272]                   | 1 | 861.5649  | 1.823 | 0.151 |
| 36 | IPI00021841 | 1 | 85.4 | 0.95 | 0.11 | 976 | ## | APOA1 Apolipoprotein A-I precursor | KVSFLSALLEEYTK                     | 3 | 645.7032  | 4.074 | 0.308 |
| 36 | IPI00021841 | 1 | 85.4 | 0.95 | 0.11 | 976 | ## | APOA1 Apolipoprotein A-I precursor | LHELQEK                            | 3 | 392.896   | 2.576 | 0.082 |
| 36 | IPI00021841 | 1 | 85.4 | 0.95 | 0.11 | 976 | ## | APOA1 Apolipoprotein A-I precursor | n[145]QK[272]LHELQEK[272]          | 2 | 792.9754  | 3.148 | 0.282 |
| 36 | IPI00021841 | 1 | 85.4 | 0.95 | 0.11 | 976 | ## | APOA1 Apolipoprotein A-I precursor | ETEGLRQEM[147]SK                   | 2 | 802.4091  | 2.592 | 0.347 |

|    |             |   |      |      |      |     |    |                                    |                             |   |           |       |       |
|----|-------------|---|------|------|------|-----|----|------------------------------------|-----------------------------|---|-----------|-------|-------|
| 36 | IPI00021841 | 1 | 85.4 | 0.95 | 0.11 | 976 | ## | APOA1 Apolipoprotein A-I precursor | LEALKENGGAR                 | 2 | 719.4123  | 3.431 | 0.272 |
| 36 | IPI00021841 | 1 | 85.4 | 0.95 | 0.11 | 976 | ## | APOA1 Apolipoprotein A-I precursor | n[145]DIEEVK[272]           | 2 | 510.7944  | 2.478 | 0.158 |
| 36 | IPI00021841 | 1 | 85.4 | 0.95 | 0.11 | 976 | ## | APOA1 Apolipoprotein A-I precursor | DIEEVK                      | 2 | 506.7873  | 2.563 | 0.181 |
| 36 | IPI00021841 | 1 | 85.4 | 0.95 | 0.11 | 976 | ## | APOA1 Apolipoprotein A-I precursor | QKLHELQEK                   | 2 | 786.9647  | 3.284 | 0.202 |
| 36 | IPI00021841 | 1 | 85.4 | 0.95 | 0.11 | 976 | ## | APOA1 Apolipoprotein A-I precursor | n[145]DLEEVK[272]AK[272]    | 3 | 455.2768  | 2.885 | 0.126 |
| 36 | IPI00021841 | 1 | 85.4 | 0.95 | 0.11 | 976 | ## | APOA1 Apolipoprotein A-I precursor | n[145]TEHLSTLSEK[272]       | 3 | 478.2677  | 3.044 | 0.249 |
| 36 | IPI00021841 | 1 | 85.4 | 0.95 | 0.11 | 976 | ## | APOA1 Apolipoprotein A-I precursor | VEPIR                       | 2 | 377.2345  | 2.11  | 0.076 |
| 36 | IPI00021841 | 1 | 85.4 | 0.95 | 0.11 | 976 | ## | APOA1 Apolipoprotein A-I precursor | DLEEVKAK                    | 3 | 451.2697  | 2.799 | 0.126 |
| 36 | IPI00021841 | 1 | 85.4 | 0.95 | 0.11 | 976 | ## | APOA1 Apolipoprotein A-I precursor | LEALK                       | 2 | 427.279   | 1.738 | 0.19  |
| 36 | IPI00021841 | 1 | 85.4 | 0.95 | 0.11 | 976 | ## | APOA1 Apolipoprotein A-I precursor | ETEGLR                      | 2 | 422.7298  | 2.282 | 0.116 |
| 36 | IPI00021841 | 1 | 85.4 | 0.95 | 0.11 | 976 | ## | APOA1 Apolipoprotein A-I precursor | n[145]QK[272]VEPLRAELQEGAR  | 2 | 1006.5782 | 4.187 | 0.107 |
| 36 | IPI00021841 | 1 | 85.4 | 0.95 | 0.11 | 976 | ## | APOA1 Apolipoprotein A-I precursor | QKVEPLR                     | 2 | 575.3588  | 2.5   | 0.155 |
| 36 | IPI00021841 | 1 | 85.4 | 0.95 | 0.11 | 976 | ## | APOA1 Apolipoprotein A-I precursor | WQEEM[147]ELYR              | 1 | 1439.6624 | 1.437 | 0.255 |
| 36 | IPI00021841 | 1 | 85.4 | 0.95 | 0.11 | 976 | ## | APOA1 Apolipoprotein A-I precursor | n[145]LLPVLESFK[272]        | 2 | 667.4203  | 2.757 | 0.162 |
| 36 | IPI00021841 | 1 | 85.4 | 0.95 | 0.11 | 976 | ## | APOA1 Apolipoprotein A-I precursor | YVVSQFEFGSALGK              | 2 | 783.4198  | 3.971 | 0.38  |
| 36 | IPI00021841 | 1 | 85.4 | 0.95 | 0.11 | 976 | ## | APOA1 Apolipoprotein A-I precursor | n[145]LSALEEYTK[272]        | 2 | 671.3789  | 3.697 | 0.354 |
| 36 | IPI00021841 | 1 | 85.4 | 0.95 | 0.11 | 976 | ## | APOA1 Apolipoprotein A-I precursor | THLAPYSDEL                  | 2 | 643.3248  | 3.089 | 0.476 |
| 36 | IPI00021841 | 1 | 85.4 | 0.95 | 0.11 | 976 | ## | APOA1 Apolipoprotein A-I precursor | n[145]ETEGLRQEM[147]SK[272] | 3 | 537.9465  | 1.52  | 0.076 |
| 36 | IPI00021841 | 1 | 85.4 | 0.95 | 0.11 | 976 | ## | APOA1 Apolipoprotein A-I precursor | n[145]QK[272]VEPLR          | 2 | 579.3659  | 2.646 | 0.088 |
| 36 | IPI00021841 | 1 | 85.4 | 0.95 | 0.11 | 976 | ## | APOA1 Apolipoprotein A-I precursor | n[145]THLAPYSDEL            | 2 | 645.3284  | 2.967 | 0.361 |
| 36 | IPI00021841 | 1 | 85.4 | 0.95 | 0.11 | 976 | ## | APOA1 Apolipoprotein A-I precursor | LSALEEYTK                   | 2 | 667.3718  | 3.718 | 0.319 |
| 36 | IPI00021841 | 1 | 85.4 | 0.95 | 0.11 | 976 | ## | APOA1 Apolipoprotein A-I precursor | DSVTSTFSK                   | 2 | 626.3326  | 3.228 | 0.341 |
| 36 | IPI00021841 | 1 | 85.4 | 0.95 | 0.11 | 976 | ## | APOA1 Apolipoprotein A-I precursor | n[145]LEALK[272]            | 2 | 431.2861  | 1.844 | 0.126 |
| 36 | IPI00021841 | 1 | 85.4 | 0.95 | 0.11 | 976 | ## | APOA1 Apolipoprotein A-I precursor | n[145]WQEEMELYR             | 2 | 714.3409  | 2.082 | 0.092 |
| 36 | IPI00021841 | 1 | 85.4 | 0.95 | 0.11 | 976 | ## | APOA1 Apolipoprotein A-I precursor | QKVEPLR                     | 3 | 383.9083  | 2.254 | 0.117 |
| 36 | IPI00021841 | 1 | 85.4 | 0.95 | 0.11 | 976 | ## | APOA1 Apolipoprotein A-I precursor | DEPPQSPWDR                  | 2 | 683.823   | 3.125 | 0.427 |
| 36 | IPI00021841 | 1 | 85.4 | 0.95 | 0.11 | 976 | ## | APOA1 Apolipoprotein A-I precursor | n[145]ETEGLR                | 2 | 424.7334  | 1.906 | 0.007 |
| 36 | IPI00021841 | 1 | 85.4 | 0.95 | 0.11 | 976 | ## | APOA1 Apolipoprotein A-I precursor | n[145]DSVTSTFSK[272]        | 2 | 630.3397  | 2.529 | 0.081 |
| 36 | IPI00021841 | 1 | 85.4 | 0.95 | 0.11 | 976 | ## | APOA1 Apolipoprotein A-I precursor | n[145]ETEGLRQEMSK[272]      | 3 | 532.6149  | 2.374 | 0.165 |
| 36 | IPI00021841 | 1 | 85.4 | 0.95 | 0.11 | 976 | ## | APOA1 Apolipoprotein A-I precursor | n[145]LPVLESFK[272]         | 2 | 610.8783  | 2.046 | 0.12  |
| 36 | IPI00021841 | 1 | 85.4 | 0.95 | 0.11 | 976 | ## | APOA1 Apolipoprotein A-I precursor | n[145]GLLPVLESFK[272]       | 2 | 695.9311  | 2.456 | 0.171 |
| 36 | IPI00021841 | 1 | 85.4 | 0.95 | 0.11 | 976 | ## | APOA1 Apolipoprotein A-I precursor | GLLPVLESFK                  | 2 | 691.924   | 2.82  | 0.212 |
| 36 | IPI00021841 | 1 | 85.4 | 0.95 | 0.11 | 976 | ## | APOA1 Apolipoprotein A-I precursor | LLPVLESFK                   | 2 | 663.4132  | 2.942 | 0.249 |
| 36 | IPI00021841 | 1 | 85.4 | 0.95 | 0.11 | 976 | ## | APOA1 Apolipoprotein A-I precursor | n[145]LLDNWDSVTSTFSK        | 2 | 948.9949  | 3.547 | 0.251 |
| 36 | IPI00021841 | 1 | 85.4 | 0.95 | 0.11 | 976 | ## | APOA1 Apolipoprotein A-I precursor | n[145]SVTSTFSK[272]         | 2 | 572.8263  | 2.64  | 0.307 |
| 36 | IPI00021841 | 1 | 85.4 | 0.95 | 0.11 | 976 | ## | APOA1 Apolipoprotein A-I precursor | n[145]DEPPQSPWDR            | 2 | 685.8265  | 2.638 | 0.309 |
| 36 | IPI00021841 | 1 | 85.4 | 0.95 | 0.11 | 976 | ## | APOA1 Apolipoprotein A-I precursor | n[145]QEEM[147]ELYR         | 2 | 629.2987  | 2.691 | 0.314 |
| 36 | IPI00021841 | 1 | 85.4 | 0.95 | 0.11 | 976 | ## | APOA1 Apolipoprotein A-I precursor | n[145]TEHLSTLSEK[272]       | 2 | 716.898   | 2.903 | 0.272 |
| 36 | IPI00021841 | 1 | 85.4 | 0.95 | 0.11 | 976 | ## | APOA1 Apolipoprotein A-I precursor | ETEGLRQEM[147]SKDLEEVK      | 3 | 819.76    | 2.643 | 0.173 |
| 36 | IPI00021841 | 1 | 85.4 | 0.95 | 0.11 | 976 | ## | APOA1 Apolipoprotein A-I precursor | SALEEYTK                    | 2 | 610.8297  | 3.212 | 0.396 |
| 36 | IPI00021841 | 1 | 85.4 | 0.95 | 0.11 | 976 | ## | APOA1 Apolipoprotein A-I precursor | ETEGLRQEMSK                 | 3 | 529.9435  | 2.051 | 0.167 |
| 36 | IPI00021841 | 1 | 85.4 | 0.95 | 0.11 | 976 | ## | APOA1 Apolipoprotein A-I precursor | n[145]TVYVDVLK[272]         | 2 | 612.8758  | 2.487 | 0.255 |
| 36 | IPI00021841 | 1 | 85.4 | 0.95 | 0.11 | 976 | ## | APOA1 Apolipoprotein A-I precursor | n[145]HLAPYSDEL             | 2 | 672.8551  | 2.754 | 0.285 |
| 36 | IPI00021841 | 1 | 85.4 | 0.95 | 0.11 | 976 | ## | APOA1 Apolipoprotein A-I precursor | ETEGLRQEM[147]SK            | 3 | 535.2751  | 1.635 | 0.186 |
| 36 | IPI00021841 | 1 | 85.4 | 0.95 | 0.11 | 976 | ## | APOA1 Apolipoprotein A-I precursor | LSPLGEEMRDR                 | 3 | 481.5855  | 2.082 | 0.143 |
| 36 | IPI00021841 | 1 | 85.4 | 0.95 | 0.11 | 976 | ## | APOA1 Apolipoprotein A-I precursor | KPALEDLR                    | 2 | 611.3694  | 2.466 | 0.244 |
| 36 | IPI00021841 | 1 | 85.4 | 0.95 | 0.11 | 976 | ## | APOA1 Apolipoprotein A-I precursor | THLAPYSD                    | 2 | 522.2615  | 1.807 | 0.386 |
| 36 | IPI00021841 | 1 | 85.4 | 0.95 | 0.11 | 976 | ## | APOA1 Apolipoprotein A-I precursor | n[145]QK[272]VEPLR          | 3 | 386.5797  | 2.097 | 0.064 |

|    |             |   |      |      |      |     |    |                                    |                                  |   |           |       |       |
|----|-------------|---|------|------|------|-----|----|------------------------------------|----------------------------------|---|-----------|-------|-------|
| 36 | IPI00021841 | 1 | 85.4 | 0.95 | 0.11 | 976 | ## | APOA1 Apolipoprotein A-I precursor | n[145]VEPLRAELQEGAR              | 3 | 537.9693  | 2.355 | 0.106 |
| 36 | IPI00021841 | 1 | 85.4 | 0.95 | 0.11 | 976 | ## | APOA1 Apolipoprotein A-I precursor | n[145]SK[272]DLEEVK[272]         | 3 | 460.6084  | 2.858 | 0.238 |
| 36 | IPI00021841 | 1 | 85.4 | 0.95 | 0.11 | 976 | ## | APOA1 Apolipoprotein A-I precursor | TEHLSTLSEK                       | 2 | 712.8909  | 3.184 | 0.293 |
| 36 | IPI00021841 | 1 | 85.4 | 0.95 | 0.11 | 976 | ## | APOA1 Apolipoprotein A-I precursor | LSPLGEEM[147]RDR                 | 3 | 486.9172  | 2.024 | 0.189 |
| 36 | IPI00021841 | 1 | 85.4 | 0.95 | 0.11 | 976 | ## | APOA1 Apolipoprotein A-I precursor | AKVQPYLDDFQK                     | 3 | 624.6841  | 2.197 | 0.129 |
| 36 | IPI00021841 | 1 | 85.4 | 0.95 | 0.11 | 976 | ## | APOA1 Apolipoprotein A-I precursor | n[145]GLLPVLESFK[272]            | 3 | 464.2898  | 2.765 | 0.129 |
| 36 | IPI00021841 | 1 | 85.4 | 0.95 | 0.11 | 976 | ## | APOA1 Apolipoprotein A-I precursor | LDDFQK                           | 2 | 523.2875  | 2.231 | 0.163 |
| 36 | IPI00021841 | 1 | 85.4 | 0.95 | 0.11 | 976 | ## | APOA1 Apolipoprotein A-I precursor | AKPALE                           | 2 | 454.7819  | 1.84  | 0.244 |
| 36 | IPI00021841 | 1 | 85.4 | 0.95 | 0.11 | 976 | ## | APOA1 Apolipoprotein A-I precursor | SKDLEEVK                         | 3 | 456.6013  | 2.669 | 0.175 |
| 36 | IPI00021841 | 1 | 85.4 | 0.95 | 0.11 | 976 | ## | APOA1 Apolipoprotein A-I precursor | DEPPQSPWDR                       | 1 | 1366.6387 | 2.018 | 0.394 |
| 36 | IPI00021841 | 1 | 85.4 | 0.95 | 0.11 | 976 | ## | APOA1 Apolipoprotein A-I precursor | n[145]WQEEM[147]ELYR             | 1 | 1443.6695 | 1.308 | 0.092 |
| 36 | IPI00021841 | 1 | 85.4 | 0.95 | 0.11 | 976 | ## | APOA1 Apolipoprotein A-I precursor | n[145]AK[272]PALE                | 2 | 458.789   | 1.994 | 0.179 |
| 36 | IPI00021841 | 1 | 85.4 | 0.95 | 0.11 | 976 | ## | APOA1 Apolipoprotein A-I precursor | AKPALEDLRQGLLPVLESFK             | 4 | 661.8942  | 2.714 | 0.063 |
| 36 | IPI00021841 | 1 | 85.4 | 0.95 | 0.11 | 976 | ## | APOA1 Apolipoprotein A-I precursor | n[145]AK[272]VQPYLDDFQK[272]     | 3 | 628.6912  | 1.764 | 0.083 |
| 36 | IPI00021841 | 1 | 85.4 | 0.95 | 0.11 | 976 | ## | APOA1 Apolipoprotein A-I precursor | n[145]QEM[147]SK[272]DLEEVK[272] | 3 | 595.3206  | 1.951 | 0.081 |
| 36 | IPI00021841 | 1 | 85.4 | 0.95 | 0.11 | 976 | ## | APOA1 Apolipoprotein A-I precursor | n[145]HLAPYSDELR                 | 3 | 448.9058  | 2.095 | 0.173 |
| 36 | IPI00021841 | 1 | 85.4 | 0.95 | 0.11 | 976 | ## | APOA1 Apolipoprotein A-I precursor | TVYVDVLK                         | 2 | 608.8687  | 2.742 | 0.047 |
| 36 | IPI00021841 | 1 | 85.4 | 0.95 | 0.11 | 976 | ## | APOA1 Apolipoprotein A-I precursor | EGSALGK                          | 2 | 471.2744  | 1.882 | 0.071 |
| 36 | IPI00021841 | 1 | 85.4 | 0.95 | 0.11 | 976 | ## | APOA1 Apolipoprotein A-I precursor | n[145]ETEGLRQEM[147]             | 2 | 626.8016  | 2.584 | 0.301 |
| 36 | IPI00021841 | 1 | 85.4 | 0.95 | 0.11 | 976 | ## | APOA1 Apolipoprotein A-I precursor | n[145]DEPPQSPWDR                 | 1 | 1370.6458 | 1.973 | 0.295 |
| 36 | IPI00021841 | 1 | 85.4 | 0.95 | 0.11 | 976 | ## | APOA1 Apolipoprotein A-I precursor | AKPALED                          | 2 | 512.2953  | 1.405 | 0.289 |
| 36 | IPI00021841 | 1 | 85.4 | 0.95 | 0.11 | 976 | ## | APOA1 Apolipoprotein A-I precursor | SKDLEEVK                         | 2 | 684.3983  | 2.913 | 0.182 |
| 36 | IPI00021841 | 1 | 85.4 | 0.95 | 0.11 | 976 | ## | APOA1 Apolipoprotein A-I precursor | n[145]DLATVYVD                   | 1 | 1039.5429 | 1.695 | 0.362 |
| 36 | IPI00021841 | 1 | 85.4 | 0.95 | 0.11 | 976 | ## | APOA1 Apolipoprotein A-I precursor | LSPLGEEM[147]RDR                 | 2 | 729.8721  | 1.639 | 0.139 |
| 36 | IPI00021841 | 1 | 85.4 | 0.95 | 0.11 | 976 | ## | APOA1 Apolipoprotein A-I precursor | KDLATVYVDVLK                     | 3 | 595.3609  | 2.732 | 0.207 |
| 36 | IPI00021841 | 1 | 85.4 | 0.95 | 0.11 | 976 | ## | APOA1 Apolipoprotein A-I precursor | n[145]THLAPYS                    | 2 | 466.7516  | 1.76  | 0.126 |
| 36 | IPI00021841 | 1 | 85.4 | 0.95 | 0.11 | 976 | ## | APOA1 Apolipoprotein A-I precursor | n[145]SK[272]DLEEVK[272]         | 2 | 690.409   | 2.625 | 0.203 |
| 36 | IPI00021841 | 1 | 85.4 | 0.95 | 0.11 | 976 | ## | APOA1 Apolipoprotein A-I precursor | THLAPYSDE                        | 2 | 586.7828  | 1.963 | 0.113 |
| 36 | IPI00021841 | 1 | 85.4 | 0.95 | 0.11 | 976 | ## | APOA1 Apolipoprotein A-I precursor | n[145]SPLGEEM[147]R              | 2 | 539.7696  | 1.674 | 0.147 |
| 36 | IPI00021841 | 1 | 85.4 | 0.95 | 0.11 | 976 | ## | APOA1 Apolipoprotein A-I precursor | LEEYTK                           | 2 | 531.7952  | 1.754 | 0.107 |
| 36 | IPI00021841 | 1 | 85.4 | 0.95 | 0.11 | 976 | ## | APOA1 Apolipoprotein A-I precursor | KLHELQEK                         | 3 | 482.2927  | 2.63  | 0.094 |
| 36 | IPI00021841 | 1 | 85.4 | 0.95 | 0.11 | 976 | ## | APOA1 Apolipoprotein A-I precursor | VSFLSALE                         | 1 | 1005.5616 | 1.54  | 0.329 |
| 36 | IPI00021841 | 1 | 85.4 | 0.95 | 0.11 | 976 | ## | APOA1 Apolipoprotein A-I precursor | n[145]ETEGLRQEM                  | 2 | 618.8042  | 2.213 | 0.227 |
| 36 | IPI00021841 | 1 | 85.4 | 0.95 | 0.11 | 976 | ## | APOA1 Apolipoprotein A-I precursor | DLATVYVD                         | 1 | 1035.5358 | 1.562 | 0.287 |
| 36 | IPI00021841 | 1 | 85.4 | 0.95 | 0.11 | 976 | ## | APOA1 Apolipoprotein A-I precursor | n[145]LDDFQK[272]                | 2 | 527.2946  | 1.759 | 0.071 |
| 36 | IPI00021841 | 1 | 85.4 | 0.95 | 0.11 | 976 | ## | APOA1 Apolipoprotein A-I precursor | n[145]THLAPY                     | 2 | 423.2355  | 1.421 | 0.194 |
| 36 | IPI00021841 | 1 | 85.4 | 0.95 | 0.11 | 976 | ## | APOA1 Apolipoprotein A-I precursor | KATEHLSTLSEK                     | 3 | 588.672   | 2.522 | 0.1   |
| 36 | IPI00021841 | 1 | 85.4 | 0.95 | 0.11 | 976 | ## | APOA1 Apolipoprotein A-I precursor | n[145]VSFLSA                     | 1 | 767.442   | 1.741 | 0.1   |
| 36 | IPI00021841 | 1 | 85.4 | 0.95 | 0.11 | 976 | ## | APOA1 Apolipoprotein A-I precursor | KVEPLR                           | 3 | 341.2221  | 2.207 | 0.069 |
| 36 | IPI00021841 | 1 | 85.4 | 0.95 | 0.11 | 976 | ## | APOA1 Apolipoprotein A-I precursor | n[145]ETEGLRQEM[147]S            | 2 | 670.3177  | 2.368 | 0.187 |
| 36 | IPI00021841 | 1 | 85.4 | 0.95 | 0.11 | 976 | ## | APOA1 Apolipoprotein A-I precursor | n[145]QGLLPVLESF                 | 2 | 623.8618  | 1.662 | 0.053 |
| 37 | IPI00021842 | 1 | 69.1 | 0.75 | 0.15 | 74  | 44 | APOE Apolipoprotein E precursor    | n[145]LAVYQAGAR                  | 1 | 1092.6283 | 2.812 | 0.341 |
| 37 | IPI00021842 | 1 | 69.1 | 0.75 | 0.15 | 74  | 44 | APOE Apolipoprotein E precursor    | AKLEEQAQQIR                      | 2 | 797.4572  | 4.398 | 0.486 |
| 37 | IPI00021842 | 1 | 69.1 | 0.75 | 0.15 | 74  | 44 | APOE Apolipoprotein E precursor    | KVEQAVETEPPELR                   | 2 | 1017.547  | 5.073 | 0.492 |
| 37 | IPI00021842 | 1 | 69.1 | 0.75 | 0.15 | 74  | 44 | APOE Apolipoprotein E precursor    | n[145]AATVGSLAGQPLQER            | 2 | 821.4557  | 4.307 | 0.437 |
| 37 | IPI00021842 | 1 | 69.1 | 0.75 | 0.15 | 74  | 44 | APOE Apolipoprotein E precursor    | n[145]GEVQAM[147]LGQSTEELR       | 2 | 904.4525  | 3.55  | 0.366 |
| 37 | IPI00021842 | 1 | 69.1 | 0.75 | 0.15 | 74  | 44 | APOE Apolipoprotein E precursor    | n[145]LGPLVEQGR                  | 2 | 556.8309  | 2.055 | 0.212 |
| 37 | IPI00021842 | 1 | 69.1 | 0.75 | 0.15 | 74  | 44 | APOE Apolipoprotein E precursor    | n[145]SELEEQLTPVAEETR            | 2 | 937.9768  | 5.135 | 0.412 |



|    |             |   |      |      |      |     |    |                                     |                                |   |           |       |       |
|----|-------------|---|------|------|------|-----|----|-------------------------------------|--------------------------------|---|-----------|-------|-------|
| 37 | IPI00021842 | 1 | 69.1 | 0.75 | 0.15 | 74  | 44 | APOE Apolipoprotein E precursor     | n[145]VQAAVGTSAAPVPSDNH        | 2 | 882.9535  | 4.623 | 0.506 |
| 37 | IPI00021842 | 1 | 69.1 | 0.75 | 0.15 | 74  | 44 | APOE Apolipoprotein E precursor     | AKLEEQAQQIR                    | 3 | 531.9739  | 2.411 | 0.344 |
| 37 | IPI00021842 | 1 | 69.1 | 0.75 | 0.15 | 74  | 44 | APOE Apolipoprotein E precursor     | n[145]AK[272]LEEQAQQIR         | 3 | 534.6453  | 4.031 | 0.364 |
| 37 | IPI00021842 | 1 | 69.1 | 0.75 | 0.15 | 74  | 44 | APOE Apolipoprotein E precursor     | ALMDETMK                       | 2 | 609.8147  | 3.388 | 0.352 |
| 37 | IPI00021842 | 1 | 69.1 | 0.75 | 0.15 | 74  | 44 | APOE Apolipoprotein E precursor     | n[145]ALM[147]DETMK[272]       | 2 | 621.8193  | 3.069 | 0.374 |
| 37 | IPI00021842 | 1 | 69.1 | 0.75 | 0.15 | 74  | 44 | APOE Apolipoprotein E precursor     | n[145]LGADMEDVCGR              | 2 | 678.2973  | 2.831 | 0.405 |
| 37 | IPI00021842 | 1 | 69.1 | 0.75 | 0.15 | 74  | 44 | APOE Apolipoprotein E precursor     | ALM[147]DETMK                  | 2 | 617.8122  | 2.732 | 0.323 |
| 37 | IPI00021842 | 1 | 69.1 | 0.75 | 0.15 | 74  | 44 | APOE Apolipoprotein E precursor     | n[145]ALMDETM[147]K[272]       | 2 | 621.8193  | 2.689 | 0.396 |
| 37 | IPI00021842 | 1 | 69.1 | 0.75 | 0.15 | 74  | 44 | APOE Apolipoprotein E precursor     | n[145]GEVQAMLGQSTEELR          | 2 | 896.455   | 3.765 | 0.343 |
| 37 | IPI00021842 | 1 | 69.1 | 0.75 | 0.15 | 74  | 44 | APOE Apolipoprotein E precursor     | n[145]LAVYQAGAR                | 2 | 546.8178  | 3.341 | 0.265 |
| 37 | IPI00021842 | 1 | 69.1 | 0.75 | 0.15 | 74  | 44 | APOE Apolipoprotein E precursor     | n[145]ALM[147]DETM[147]K[272]  | 2 | 629.8167  | 2.638 | 0.34  |
| 37 | IPI00021842 | 1 | 69.1 | 0.75 | 0.15 | 74  | 44 | APOE Apolipoprotein E precursor     | ALM[147]DETM[147]K             | 2 | 625.8096  | 2.613 | 0.292 |
| 37 | IPI00021842 | 1 | 69.1 | 0.75 | 0.15 | 74  | 44 | APOE Apolipoprotein E precursor     | LAVYQAGAR                      | 2 | 544.8142  | 2.678 | 0.276 |
| 37 | IPI00021842 | 1 | 69.1 | 0.75 | 0.15 | 74  | 44 | APOE Apolipoprotein E precursor     | n[145]ALMDETMK[272]            | 2 | 613.8218  | 2.894 | 0.262 |
| 37 | IPI00021842 | 1 | 69.1 | 0.75 | 0.15 | 74  | 44 | APOE Apolipoprotein E precursor     | ELQAAQAR                       | 2 | 513.7882  | 2.203 | 0.105 |
| 37 | IPI00021842 | 1 | 69.1 | 0.75 | 0.15 | 74  | 44 | APOE Apolipoprotein E precursor     | n[145]WVQTLSEVQEELLSSQVTQELR   | 3 | 958.837   | 3.084 | 0.241 |
| 37 | IPI00021842 | 1 | 69.1 | 0.75 | 0.15 | 74  | 44 | APOE Apolipoprotein E precursor     | n[145]LQAEAFQAR                | 2 | 589.3259  | 1.768 | 0.141 |
| 37 | IPI00021842 | 1 | 69.1 | 0.75 | 0.15 | 74  | 44 | APOE Apolipoprotein E precursor     | n[145]AK[272]LEEQAQQIR         | 2 | 801.4643  | 4.342 | 0.317 |
| 37 | IPI00021842 | 1 | 69.1 | 0.75 | 0.15 | 74  | 44 | APOE Apolipoprotein E precursor     | n[145]ELQAAQAR                 | 2 | 515.7917  | 2.198 | 0.043 |
| 37 | IPI00021842 | 1 | 69.1 | 0.75 | 0.15 | 74  | 44 | APOE Apolipoprotein E precursor     | WELALGR                        | 2 | 492.7849  | 2.431 | 0.182 |
| 37 | IPI00021842 | 1 | 69.1 | 0.75 | 0.15 | 74  | 44 | APOE Apolipoprotein E precursor     | n[145]SWFEPLVEDMQR             | 2 | 840.9123  | 2.905 | 0.28  |
| 37 | IPI00021842 | 1 | 69.1 | 0.75 | 0.15 | 74  | 44 | APOE Apolipoprotein E precursor     | n[145]WELALGR                  | 2 | 494.7885  | 2.791 | 0.103 |
| 37 | IPI00021842 | 1 | 69.1 | 0.75 | 0.15 | 74  | 44 | APOE Apolipoprotein E precursor     | DADDLQK                        | 2 | 542.7853  | 2.779 | 0.118 |
| 37 | IPI00021842 | 1 | 69.1 | 0.75 | 0.15 | 74  | 44 | APOE Apolipoprotein E precursor     | KVEQAVETEPEPELR                | 3 | 678.7004  | 4.018 | 0.344 |
| 37 | IPI00021842 | 1 | 69.1 | 0.75 | 0.15 | 74  | 44 | APOE Apolipoprotein E precursor     | n[145]LEEQAQQIR                | 2 | 629.8472  | 2.813 | 0.057 |
| 37 | IPI00021842 | 1 | 69.1 | 0.75 | 0.15 | 74  | 44 | APOE Apolipoprotein E precursor     | ALMDETM[147]K                  | 2 | 617.8122  | 2.274 | 0.171 |
| 37 | IPI00021842 | 1 | 69.1 | 0.75 | 0.15 | 74  | 44 | APOE Apolipoprotein E precursor     | n[145]SWFEPLVEDM[147]QR        | 2 | 848.9097  | 2.658 | 0.105 |
| 37 | IPI00021842 | 1 | 69.1 | 0.75 | 0.15 | 74  | 44 | APOE Apolipoprotein E precursor     | EQVAEVR                        | 2 | 485.7695  | 2.075 | 0.069 |
| 37 | IPI00021842 | 1 | 69.1 | 0.75 | 0.15 | 74  | 44 | APOE Apolipoprotein E precursor     | n[145]DADDLQK[272]             | 2 | 546.7924  | 2.261 | 0.039 |
| 37 | IPI00021842 | 1 | 69.1 | 0.75 | 0.15 | 74  | 44 | APOE Apolipoprotein E precursor     | n[145]GLSAIR                   | 2 | 380.7435  | 1.949 | 0.026 |
| 37 | IPI00021842 | 1 | 69.1 | 0.75 | 0.15 | 74  | 44 | APOE Apolipoprotein E precursor     | n[145]LGADM[147]EDVCGR         | 2 | 686.2948  | 1.632 | 0.057 |
| 37 | IPI00021842 | 1 | 69.1 | 0.75 | 0.15 | 74  | 44 | APOE Apolipoprotein E precursor     | DRLDEVK                        | 3 | 385.5558  | 2.658 | 0.039 |
| 37 | IPI00021842 | 1 | 69.1 | 0.75 | 0.15 | 74  | 44 | APOE Apolipoprotein E precursor     | n[145]DRLDEVK[272]             | 3 | 388.2272  | 2.396 | 0.016 |
| 37 | IPI00021842 | 1 | 69.1 | 0.75 | 0.15 | 74  | 44 | APOE Apolipoprotein E precursor     | AVYQAGAR                       | 2 | 488.2722  | 2.557 | 0.169 |
| 37 | IPI00021842 | 1 | 69.1 | 0.75 | 0.15 | 74  | 44 | APOE Apolipoprotein E precursor     | n[145]LGQSTEELR                | 2 | 588.8207  | 2.436 | 0.151 |
| 37 | IPI00021842 | 1 | 69.1 | 0.75 | 0.15 | 74  | 44 | APOE Apolipoprotein E precursor     | n[145]DRLDEVK[272]             | 2 | 581.8372  | 1.314 | 0.002 |
| 37 | IPI00021842 | 1 | 69.1 | 0.75 | 0.15 | 74  | 44 | APOE Apolipoprotein E precursor     | n[145]QWAGLVEK                 | 2 | 607.8544  | 2.028 | 0.104 |
| 38 | IPI00021854 | 1 | 64   | 0.79 | 0.06 | 228 | 43 | APOA2 Apolipoprotein A-II precursor | SPELQAEAK                      | 1 | 1252.6897 | 3.017 | 0.39  |
| 38 | IPI00021854 | 1 | 64   | 0.79 | 0.06 | 228 | 43 | APOA2 Apolipoprotein A-II precursor | n[145]SPELQAEAK[272]           | 1 | 1260.7039 | 2.708 | 0.335 |
| 38 | IPI00021854 | 1 | 64   | 0.79 | 0.06 | 228 | 43 | APOA2 Apolipoprotein A-II precursor | EPCVESLSQYFQTVTDYGK            | 2 | 1310.1271 | 5.335 | 0.587 |
| 38 | IPI00021854 | 1 | 64   | 0.79 | 0.06 | 228 | 43 | APOA2 Apolipoprotein A-II precursor | VKSPELQAEAK                    | 2 | 810.4777  | 3.495 | 0.275 |
| 38 | IPI00021854 | 1 | 64   | 0.79 | 0.06 | 228 | 43 | APOA2 Apolipoprotein A-II precursor | n[145]CVESLSQYFQTVTDYGK[272]   | 2 | 1201.0866 | 4.843 | 0.578 |
| 38 | IPI00021854 | 1 | 64   | 0.79 | 0.06 | 228 | 43 | APOA2 Apolipoprotein A-II precursor | n[145]EPCVESLSQYFQTVTDYGK[272] | 2 | 1314.1342 | 5.208 | 0.613 |
| 38 | IPI00021854 | 1 | 64   | 0.79 | 0.06 | 228 | 43 | APOA2 Apolipoprotein A-II precursor | n[145]VK[272]SPELQAEAK[272]    | 2 | 816.4883  | 3.489 | 0.26  |
| 38 | IPI00021854 | 1 | 64   | 0.79 | 0.06 | 228 | 43 | APOA2 Apolipoprotein A-II precursor | CVESLSQYFQTVTDYGK              | 3 | 798.3887  | 4.312 | 0.487 |
| 38 | IPI00021854 | 1 | 64   | 0.79 | 0.06 | 228 | 43 | APOA2 Apolipoprotein A-II precursor | EPCVESLSQYFQTVTDYGK            | 3 | 873.7538  | 2.587 | 0.013 |
| 38 | IPI00021854 | 1 | 64   | 0.79 | 0.06 | 228 | 43 | APOA2 Apolipoprotein A-II precursor | VKSPELQAEAK                    | 3 | 540.6542  | 2.492 | 0.276 |
| 38 | IPI00021854 | 1 | 64   | 0.79 | 0.06 | 228 | 43 | APOA2 Apolipoprotein A-II precursor | n[145]EPCVESLSQYFQTVTDYGK[272] | 3 | 876.4252  | 3.575 | 0.517 |

|    |             |   |      |      |      |     |    |                                     |                                             |   |           |       |       |
|----|-------------|---|------|------|------|-----|----|-------------------------------------|---------------------------------------------|---|-----------|-------|-------|
| 38 | IPI00021854 | 1 | 64   | 0.79 | 0.06 | 228 | 43 | APOA2 Apolipoprotein A-II precursor | n[145]VK[272]SPELQAEAK[272]                 | 3 | 544.6613  | 3.99  | 0.194 |
| 38 | IPI00021854 | 1 | 64   | 0.79 | 0.06 | 228 | 43 | APOA2 Apolipoprotein A-II precursor | n[145]EPCVESLSVQYFQTVTDYGK[272]DLM[147]EK[2 | 4 | 851.6673  | 3.327 | 0.335 |
| 38 | IPI00021854 | 1 | 64   | 0.79 | 0.06 | 228 | 43 | APOA2 Apolipoprotein A-II precursor | EPCVESLSVQYFQTVTDYGKDLM[147]EK              | 4 | 848.662   | 2.821 | 0.172 |
| 38 | IPI00021854 | 1 | 64   | 0.79 | 0.06 | 228 | 43 | APOA2 Apolipoprotein A-II precursor | SKEQLTPLIKK                                 | 4 | 462.0476  | 2.364 | 0.367 |
| 38 | IPI00021854 | 1 | 64   | 0.79 | 0.06 | 228 | 43 | APOA2 Apolipoprotein A-II precursor | n[145]SYFEK[272]SK[272]EQLTPLIK[272]        | 4 | 597.6063  | 2.22  | 0.342 |
| 38 | IPI00021854 | 1 | 64   | 0.79 | 0.06 | 228 | 43 | APOA2 Apolipoprotein A-II precursor | SPELQAEAK                                   | 2 | 626.8485  | 3.422 | 0.349 |
| 38 | IPI00021854 | 1 | 64   | 0.79 | 0.06 | 228 | 43 | APOA2 Apolipoprotein A-II precursor | n[145]SPELQAEAK[272]                        | 2 | 630.8556  | 3.38  | 0.403 |
| 38 | IPI00021854 | 1 | 64   | 0.79 | 0.06 | 228 | 43 | APOA2 Apolipoprotein A-II precursor | SYFEKSKEQLTPLIK                             | 3 | 791.1298  | 3.237 | 0.314 |
| 38 | IPI00021854 | 1 | 64   | 0.79 | 0.06 | 228 | 43 | APOA2 Apolipoprotein A-II precursor | SKEQLTPLIK                                  | 3 | 526.331   | 2.414 | 0.121 |
| 38 | IPI00021854 | 1 | 64   | 0.79 | 0.06 | 228 | 43 | APOA2 Apolipoprotein A-II precursor | n[145]SK[272]EQLTPLIK[272]                  | 3 | 530.3381  | 2.207 | 0.093 |
| 38 | IPI00021854 | 1 | 64   | 0.79 | 0.06 | 228 | 43 | APOA2 Apolipoprotein A-II precursor | n[145]SYFEK[272]SK[272]EQLTPLIK[272]        | 3 | 796.4726  | 2.536 | 0.168 |
| 38 | IPI00021854 | 1 | 64   | 0.79 | 0.06 | 228 | 43 | APOA2 Apolipoprotein A-II precursor | n[145]EQLTPLIK[272]                         | 2 | 615.389   | 2.237 | 0.161 |
| 38 | IPI00021854 | 1 | 64   | 0.79 | 0.06 | 228 | 43 | APOA2 Apolipoprotein A-II precursor | EQLTPLIK                                    | 2 | 611.3819  | 2.709 | 0.214 |
| 38 | IPI00021854 | 1 | 64   | 0.79 | 0.06 | 228 | 43 | APOA2 Apolipoprotein A-II precursor | n[145]SYFEK[272]                            | 1 | 961.5234  | 1.955 | 0.134 |
| 38 | IPI00021854 | 1 | 64   | 0.79 | 0.06 | 228 | 43 | APOA2 Apolipoprotein A-II precursor | n[145]SYFEK[272]                            | 2 | 481.2653  | 1.786 | 0.118 |
| 38 | IPI00021854 | 1 | 64   | 0.79 | 0.06 | 228 | 43 | APOA2 Apolipoprotein A-II precursor | n[145]SK[272]EQLTPLIK[272]                  | 2 | 795.0036  | 1.197 | 0.014 |
| 38 | IPI00021854 | 1 | 64   | 0.79 | 0.06 | 228 | 43 | APOA2 Apolipoprotein A-II precursor | SYFEK                                       | 1 | 953.5092  | 1.787 | 0.138 |
| 38 | IPI00021854 | 1 | 64   | 0.79 | 0.06 | 228 | 43 | APOA2 Apolipoprotein A-II precursor | SYFEK                                       | 2 | 477.2582  | 1.966 | 0.167 |
| 38 | IPI00021854 | 1 | 64   | 0.79 | 0.06 | 228 | 43 | APOA2 Apolipoprotein A-II precursor | SKEQLTPLIK                                  | 2 | 788.9929  | 2.585 | 0.192 |
| 38 | IPI00021854 | 1 | 64   | 0.79 | 0.06 | 228 | 43 | APOA2 Apolipoprotein A-II precursor | EQLTPLIKK                                   | 3 | 497.3204  | 2.605 | 0.137 |
| 38 | IPI00021854 | 1 | 64   | 0.79 | 0.06 | 228 | 43 | APOA2 Apolipoprotein A-II precursor | n[145]EPCVESLSVQYFQTVTDYGK[272]             | 4 | 657.5708  | 2.734 | 0.074 |
| 38 | IPI00021854 | 1 | 64   | 0.79 | 0.06 | 228 | 43 | APOA2 Apolipoprotein A-II precursor | SYFEKSKEQLTPLIK                             | 4 | 593.5992  | 1.998 | 0.196 |
| 38 | IPI00021854 | 1 | 64   | 0.79 | 0.06 | 228 | 43 | APOA2 Apolipoprotein A-II precursor | n[145]DLMEK[272]                            | 2 | 462.2592  | 2.054 | 0.2   |
| 38 | IPI00021854 | 1 | 64   | 0.79 | 0.06 | 228 | 43 | APOA2 Apolipoprotein A-II precursor | DLMEK                                       | 2 | 458.2521  | 2.001 | 0.039 |
| 38 | IPI00021854 | 1 | 64   | 0.79 | 0.06 | 228 | 43 | APOA2 Apolipoprotein A-II precursor | FQTVTDYGK                                   | 2 | 669.8563  | 3.252 | 0.291 |
| 38 | IPI00021854 | 1 | 64   | 0.79 | 0.06 | 228 | 43 | APOA2 Apolipoprotein A-II precursor | n[145]FQTVTDYGK[272]                        | 2 | 673.8634  | 3.108 | 0.278 |
| 38 | IPI00021854 | 1 | 64   | 0.79 | 0.06 | 228 | 43 | APOA2 Apolipoprotein A-II precursor | KSPELQAEAK                                  | 3 | 507.6314  | 2.878 | 0.227 |
| 38 | IPI00021854 | 1 | 64   | 0.79 | 0.06 | 228 | 43 | APOA2 Apolipoprotein A-II precursor | n[145]ELQAEAK[272]                          | 2 | 538.8132  | 2.361 | 0.127 |
| 38 | IPI00021854 | 1 | 64   | 0.79 | 0.06 | 228 | 43 | APOA2 Apolipoprotein A-II precursor | ELQAEAK                                     | 2 | 534.8061  | 2.434 | 0.128 |
| 38 | IPI00021854 | 1 | 64   | 0.79 | 0.06 | 228 | 43 | APOA2 Apolipoprotein A-II precursor | n[145]AGTELVNFLSY                           | 1 | 1357.7121 | 2.372 | 0.357 |
| 38 | IPI00021854 | 1 | 64   | 0.79 | 0.06 | 228 | 43 | APOA2 Apolipoprotein A-II precursor | KAGTELVNFLSY                                | 2 | 811.4511  | 2.106 | 0.285 |
| 38 | IPI00021854 | 1 | 64   | 0.79 | 0.06 | 228 | 43 | APOA2 Apolipoprotein A-II precursor | KSYFEK                                      | 3 | 407.9046  | 2.615 | 0.134 |
| 38 | IPI00021854 | 1 | 64   | 0.79 | 0.06 | 228 | 43 | APOA2 Apolipoprotein A-II precursor | KEPCVESLSVQYFQTVTDYGK                       | 4 | 722.6147  | 2.888 | 0.208 |
| 38 | IPI00021854 | 1 | 64   | 0.79 | 0.06 | 228 | 43 | APOA2 Apolipoprotein A-II precursor | n[145]YFEK[272]                             | 2 | 437.7493  | 1.194 | 0.17  |
| 39 | IPI00021855 | 1 | 49.4 | 0.92 | 0.1  | 46  | 26 | APOC1 Apolipoprotein C-I precursor  | DVSSALDK                                    | 1 | 1114.6104 | 2.93  | 0.353 |
| 39 | IPI00021855 | 1 | 49.4 | 0.92 | 0.1  | 46  | 26 | APOC1 Apolipoprotein C-I precursor  | n[145]DVSSALDK[272]                         | 1 | 1122.6246 | 3.053 | 0.38  |
| 39 | IPI00021855 | 1 | 49.4 | 0.92 | 0.1  | 46  | 26 | APOC1 Apolipoprotein C-I precursor  | n[145]EFGNTLEDK[272]                        | 1 | 1340.6937 | 2.987 | 0.306 |
| 39 | IPI00021855 | 1 | 49.4 | 0.92 | 0.1  | 46  | 26 | APOC1 Apolipoprotein C-I precursor  | n[145]EFGNTLEDK[272]                        | 2 | 670.8505  | 2.254 | 0.199 |
| 39 | IPI00021855 | 1 | 49.4 | 0.92 | 0.1  | 46  | 26 | APOC1 Apolipoprotein C-I precursor  | n[145]IK[272]QSELSAK[272]                   | 2 | 718.4459  | 3.761 | 0.407 |
| 39 | IPI00021855 | 1 | 49.4 | 0.92 | 0.1  | 46  | 26 | APOC1 Apolipoprotein C-I precursor  | LKEFGNTLEDK                                 | 3 | 571.9893  | 4.016 | 0.378 |
| 39 | IPI00021855 | 1 | 49.4 | 0.92 | 0.1  | 46  | 26 | APOC1 Apolipoprotein C-I precursor  | n[145]LK[272]EFGNTLEDK[272]                 | 3 | 575.9964  | 4.34  | 0.381 |
| 39 | IPI00021855 | 1 | 49.4 | 0.92 | 0.1  | 46  | 26 | APOC1 Apolipoprotein C-I precursor  | n[145]IK[272]QSELSAK[272]                   | 3 | 479.2997  | 3.675 | 0.317 |
| 39 | IPI00021855 | 1 | 49.4 | 0.92 | 0.1  | 46  | 26 | APOC1 Apolipoprotein C-I precursor  | EWFSETFQK                                   | 2 | 741.3748  | 3.703 | 0.381 |
| 39 | IPI00021855 | 1 | 49.4 | 0.92 | 0.1  | 46  | 26 | APOC1 Apolipoprotein C-I precursor  | IKQSELSAK                                   | 3 | 475.2926  | 2.182 | 0.085 |
| 39 | IPI00021855 | 1 | 49.4 | 0.92 | 0.1  | 46  | 26 | APOC1 Apolipoprotein C-I precursor  | EFGNTLEDK                                   | 1 | 1332.6795 | 3.134 | 0.222 |
| 39 | IPI00021855 | 1 | 49.4 | 0.92 | 0.1  | 46  | 26 | APOC1 Apolipoprotein C-I precursor  | EFGNTLEDK                                   | 2 | 666.8434  | 3.172 | 0.225 |
| 39 | IPI00021855 | 1 | 49.4 | 0.92 | 0.1  | 46  | 26 | APOC1 Apolipoprotein C-I precursor  | n[145]EWFSETFQK[272]                        | 2 | 745.3819  | 2.846 | 0.258 |
| 39 | IPI00021855 | 1 | 49.4 | 0.92 | 0.1  | 46  | 26 | APOC1 Apolipoprotein C-I precursor  | LKEFGNTLEDK                                 | 2 | 857.4804  | 3.527 | 0.358 |

|    |             |   |      |      |      |     |    |                                                   |                                        |   |           |       |       |
|----|-------------|---|------|------|------|-----|----|---------------------------------------------------|----------------------------------------|---|-----------|-------|-------|
| 39 | IPI00021855 | 1 | 49.4 | 0.92 | 0.1  | 46  | 26 | APOC1 Apolipoprotein C-I precursor                | n[145]QSELSAK[272]                     | 2 | 525.8053  | 2.44  | 0.134 |
| 39 | IPI00021855 | 1 | 49.4 | 0.92 | 0.1  | 46  | 26 | APOC1 Apolipoprotein C-I precursor                | QSELSAK                                | 2 | 521.7982  | 2.067 | 0.199 |
| 39 | IPI00021855 | 1 | 49.4 | 0.92 | 0.1  | 46  | 26 | APOC1 Apolipoprotein C-I precursor                | n[145]LK[272]EFGNTLEDK[272]            | 2 | 863.491   | 3.457 | 0.34  |
| 39 | IPI00021855 | 1 | 49.4 | 0.92 | 0.1  | 46  | 26 | APOC1 Apolipoprotein C-I precursor                | IKQSELSAK                              | 2 | 712.4353  | 3.639 | 0.28  |
| 39 | IPI00021855 | 1 | 49.4 | 0.92 | 0.1  | 46  | 26 | APOC1 Apolipoprotein C-I precursor                | n[145]EWFSETFQK                        | 2 | 743.3784  | 3.058 | 0.404 |
| 39 | IPI00021855 | 1 | 49.4 | 0.92 | 0.1  | 46  | 26 | APOC1 Apolipoprotein C-I precursor                | n[145]DVSSALDK[272]                    | 2 | 561.8159  | 3.467 | 0.295 |
| 39 | IPI00021855 | 1 | 49.4 | 0.92 | 0.1  | 46  | 26 | APOC1 Apolipoprotein C-I precursor                | n[145]DVSSALDK[272]LK[272]             | 3 | 503.3067  | 2.906 | 0.249 |
| 39 | IPI00021855 | 1 | 49.4 | 0.92 | 0.1  | 46  | 26 | APOC1 Apolipoprotein C-I precursor                | DVSSALDK                               | 2 | 557.8088  | 2.635 | 0.304 |
| 39 | IPI00021855 | 1 | 49.4 | 0.92 | 0.1  | 46  | 26 | APOC1 Apolipoprotein C-I precursor                | n[145]TPDVSSALDK[272]                  | 2 | 660.8661  | 2.525 | 0.239 |
| 39 | IPI00021855 | 1 | 49.4 | 0.92 | 0.1  | 46  | 26 | APOC1 Apolipoprotein C-I precursor                | TPDVSSALDK                             | 2 | 656.859   | 2.774 | 0.186 |
| 39 | IPI00021855 | 1 | 49.4 | 0.92 | 0.1  | 46  | 26 | APOC1 Apolipoprotein C-I precursor                | IKQSELSAKM[147]R                       | 3 | 576.3381  | 1.532 | 0.217 |
| 39 | IPI00021855 | 1 | 49.4 | 0.92 | 0.1  | 46  | 26 | APOC1 Apolipoprotein C-I precursor                | n[145]JK[272]QSELSAK[272]M[147]R       | 3 | 580.3452  | 1.904 | 0.078 |
| 40 | IPI00021856 | 1 | 78.2 | 0.77 | 0.03 | 29  | 18 | APOC2 Apolipoprotein C-II precursor               | n[145]ESLSSYWESAK[272]                 | 2 | 787.9007  | 4.37  | 0.445 |
| 40 | IPI00021856 | 1 | 78.2 | 0.77 | 0.03 | 29  | 18 | APOC2 Apolipoprotein C-II precursor               | n[145]TAAQNLYEK[272]                   | 2 | 663.3688  | 3.9   | 0.32  |
| 40 | IPI00021856 | 1 | 78.2 | 0.77 | 0.03 | 29  | 18 | APOC2 Apolipoprotein C-II precursor               | TQQPQQDEM[147]PSPTFLTQVK               | 3 | 833.7565  | 4.577 | 0.476 |
| 40 | IPI00021856 | 1 | 78.2 | 0.77 | 0.03 | 29  | 18 | APOC2 Apolipoprotein C-II precursor               | n[145]TQQPQQDEM[147]PSPTFLTQVK[272]    | 3 | 836.4279  | 4.912 | 0.533 |
| 40 | IPI00021856 | 1 | 78.2 | 0.77 | 0.03 | 29  | 18 | APOC2 Apolipoprotein C-II precursor               | STAAM[147]STYTGIFTDQVLSVLK             | 3 | 843.7805  | 3.616 | 0.425 |
| 40 | IPI00021856 | 1 | 78.2 | 0.77 | 0.03 | 29  | 18 | APOC2 Apolipoprotein C-II precursor               | TAAQNLYEK                              | 2 | 659.3617  | 3.883 | 0.335 |
| 40 | IPI00021856 | 1 | 78.2 | 0.77 | 0.03 | 29  | 18 | APOC2 Apolipoprotein C-II precursor               | n[145]TYLPAVDEK[272]                   | 2 | 662.3736  | 2.762 | 0.293 |
| 40 | IPI00021856 | 1 | 78.2 | 0.77 | 0.03 | 29  | 18 | APOC2 Apolipoprotein C-II precursor               | ESLSSYWESAK                            | 2 | 783.8936  | 3.342 | 0.343 |
| 40 | IPI00021856 | 1 | 78.2 | 0.77 | 0.03 | 29  | 18 | APOC2 Apolipoprotein C-II precursor               | TYLPAVDEKLRDLYSK                       | 3 | 777.7739  | 3.507 | 0.266 |
| 40 | IPI00021856 | 1 | 78.2 | 0.77 | 0.03 | 29  | 18 | APOC2 Apolipoprotein C-II precursor               | n[145]STAAM[147]STYTGIFTDQVLSVLK[272]  | 3 | 846.4519  | 3.428 | 0.256 |
| 40 | IPI00021856 | 1 | 78.2 | 0.77 | 0.03 | 29  | 18 | APOC2 Apolipoprotein C-II precursor               | TYLPAVDEK                              | 2 | 658.3665  | 2.778 | 0.275 |
| 40 | IPI00021856 | 1 | 78.2 | 0.77 | 0.03 | 29  | 18 | APOC2 Apolipoprotein C-II precursor               | n[145]STAAMSTYTGIFTDQVLSVLK[272]GEE    | 3 | 946.1558  | 2.713 | 0.247 |
| 40 | IPI00021856 | 1 | 78.2 | 0.77 | 0.03 | 29  | 18 | APOC2 Apolipoprotein C-II precursor               | TYLPAVDEKLRDLYSK                       | 4 | 583.5823  | 2.164 | 0.138 |
| 40 | IPI00021856 | 1 | 78.2 | 0.77 | 0.03 | 29  | 18 | APOC2 Apolipoprotein C-II precursor               | STAAMSTYTGIFTDQVLSVLKGEE               | 3 | 943.4844  | 2.396 | 0.258 |
| 40 | IPI00021856 | 1 | 78.2 | 0.77 | 0.03 | 29  | 18 | APOC2 Apolipoprotein C-II precursor               | n[145]DLYSK[272]                       | 2 | 457.2653  | 1.878 | 0.198 |
| 40 | IPI00021856 | 1 | 78.2 | 0.77 | 0.03 | 29  | 18 | APOC2 Apolipoprotein C-II precursor               | DLYSK                                  | 2 | 453.2582  | 1.635 | 0.17  |
| 40 | IPI00021856 | 1 | 78.2 | 0.77 | 0.03 | 29  | 18 | APOC2 Apolipoprotein C-II precursor               | n[145]TGIFTDQVLSVLK[272]               | 2 | 855.008   | 3.865 | 0.23  |
| 40 | IPI00021856 | 1 | 78.2 | 0.77 | 0.03 | 29  | 18 | APOC2 Apolipoprotein C-II precursor               | ESLSSYWESAK[272]                       | 2 | 785.8971  | 2.63  | 0.123 |
| 41 | IPI00021857 | 1 | 51.5 | 0.72 | 0.2  | 24  | 14 | APOC3 Apolipoprotein C-III precursor              | DALSSVQESQVAQQAR                       | 2 | 928.9767  | 5.545 | 0.567 |
| 41 | IPI00021857 | 1 | 51.5 | 0.72 | 0.2  | 24  | 14 | APOC3 Apolipoprotein C-III precursor              | GWVTDGFSSLK                            | 2 | 738.8959  | 3.842 | 0.414 |
| 41 | IPI00021857 | 1 | 51.5 | 0.72 | 0.2  | 24  | 14 | APOC3 Apolipoprotein C-III precursor              | SEAEDASLLSFM[147]QGYM[147]K            | 2 | 1110.0216 | 5.86  | 0.569 |
| 41 | IPI00021857 | 1 | 51.5 | 0.72 | 0.2  | 24  | 14 | APOC3 Apolipoprotein C-III precursor              | n[145]DALSSVQESQVAQQAR                 | 2 | 930.9802  | 5.13  | 0.515 |
| 41 | IPI00021857 | 1 | 51.5 | 0.72 | 0.2  | 24  | 14 | APOC3 Apolipoprotein C-III precursor              | n[145]GWVTDGFSSLK[272]                 | 2 | 742.903   | 3.446 | 0.411 |
| 41 | IPI00021857 | 1 | 51.5 | 0.72 | 0.2  | 24  | 14 | APOC3 Apolipoprotein C-III precursor              | n[145]SEAEDASLLSFMQGYMK[272]           | 2 | 1098.0338 | 5.303 | 0.563 |
| 41 | IPI00021857 | 1 | 51.5 | 0.72 | 0.2  | 24  | 14 | APOC3 Apolipoprotein C-III precursor              | n[145]SEAEDASLLSFM[147]QGYM[147]K[272] | 2 | 1114.0287 | 5.944 | 0.527 |
| 41 | IPI00021857 | 1 | 51.5 | 0.72 | 0.2  | 24  | 14 | APOC3 Apolipoprotein C-III precursor              | DALSSVQESQVAQQAR                       | 3 | 619.6535  | 3.248 | 0.239 |
| 41 | IPI00021857 | 1 | 51.5 | 0.72 | 0.2  | 24  | 14 | APOC3 Apolipoprotein C-III precursor              | n[145]DYWSTVK[272]                     | 2 | 593.821   | 1.62  | 0.294 |
| 41 | IPI00021857 | 1 | 51.5 | 0.72 | 0.2  | 24  | 14 | APOC3 Apolipoprotein C-III precursor              | DYWSTVK                                | 2 | 589.8139  | 2.745 | 0.271 |
| 41 | IPI00021857 | 1 | 51.5 | 0.72 | 0.2  | 24  | 14 | APOC3 Apolipoprotein C-III precursor              | n[145]GWVTDGFSSLK                      | 2 | 740.8995  | 3.534 | 0.261 |
| 41 | IPI00021857 | 1 | 51.5 | 0.72 | 0.2  | 24  | 14 | APOC3 Apolipoprotein C-III precursor              | n[145]GWVTDGFSSLK                      | 3 | 494.2687  | 2.215 | 0.183 |
| 41 | IPI00021857 | 1 | 51.5 | 0.72 | 0.2  | 24  | 14 | APOC3 Apolipoprotein C-III precursor              | n[145]SEAEDASLLSFMQGYM[147]K[272]      | 2 | 1106.0313 | 5.589 | 0.551 |
| 41 | IPI00021857 | 1 | 51.5 | 0.72 | 0.2  | 24  | 14 | APOC3 Apolipoprotein C-III precursor              | SEAEDASLLSFMQGYM[147]K                 | 2 | 1102.0242 | 4.768 | 0.56  |
| 41 | IPI00021857 | 1 | 51.5 | 0.72 | 0.2  | 24  | 14 | APOC3 Apolipoprotein C-III precursor              | n[145]SEAEDASLLSFM[147]QGYM[147]K[272] | 3 | 743.0216  | 2.643 | 0.134 |
| 42 | IPI00021885 | 1 | 42.1 | 0.91 | 0.17 | 521 | ## | FGA Isoform 1 of Fibrinogen alpha chain precursor | TVIGPDGHK                              | 1 | 1203.6845 | 2.721 | 0.374 |
| 42 | IPI00021885 | 1 | 42.1 | 0.91 | 0.17 | 521 | ## | FGA Isoform 1 of Fibrinogen alpha chain precursor | n[145]TVIGPDGHK[272]                   | 1 | 1211.6987 | 2.629 | 0.394 |
| 42 | IPI00021885 | 1 | 42.1 | 0.91 | 0.17 | 521 | ## | FGA Isoform 1 of Fibrinogen alpha chain precursor | DSHSLTTNIMEILR                         | 2 | 885.4644  | 4.646 | 0.388 |

|    |             |   |      |      |      |     |    |                                                   |                                   |   |           |       |       |
|----|-------------|---|------|------|------|-----|----|---------------------------------------------------|-----------------------------------|---|-----------|-------|-------|
| 42 | IPI00021885 | 1 | 42.1 | 0.91 | 0.17 | 521 | ## | FGA Isoform 1 of Fibrinogen alpha chain precursor | DSHSLTTNIM[147]EILR               | 2 | 893.4618  | 1.722 | 0.064 |
| 42 | IPI00021885 | 1 | 42.1 | 0.91 | 0.17 | 521 | ## | FGA Isoform 1 of Fibrinogen alpha chain precursor | ESSSHHPGIAEFPSR                   | 2 | 889.4345  | 4.859 | 0.444 |
| 42 | IPI00021885 | 1 | 42.1 | 0.91 | 0.17 | 521 | ## | FGA Isoform 1 of Fibrinogen alpha chain precursor | EVDLKDYEDQQK                      | 2 | 965.4995  | 4.798 | 0.37  |
| 42 | IPI00021885 | 1 | 42.1 | 0.91 | 0.17 | 521 | ## | FGA Isoform 1 of Fibrinogen alpha chain precursor | GGSTSYGTGSETESPR                  | 2 | 856.8898  | 3.42  | 0.497 |
| 42 | IPI00021885 | 1 | 42.1 | 0.91 | 0.17 | 521 | ## | FGA Isoform 1 of Fibrinogen alpha chain precursor | GLIDEVNQDFTNR                     | 2 | 830.9181  | 4.681 | 0.443 |
| 42 | IPI00021885 | 1 | 42.1 | 0.91 | 0.17 | 521 | ## | FGA Isoform 1 of Fibrinogen alpha chain precursor | GSESGIFTNTK                       | 2 | 710.8752  | 4.617 | 0.49  |
| 42 | IPI00021885 | 1 | 42.1 | 0.91 | 0.17 | 521 | ## | FGA Isoform 1 of Fibrinogen alpha chain precursor | HPDEAAFFDTASTGK                   | 2 | 937.4576  | 5.841 | 0.538 |
| 42 | IPI00021885 | 1 | 42.1 | 0.91 | 0.17 | 521 | ## | FGA Isoform 1 of Fibrinogen alpha chain precursor | HRHPDEAAFFDTASTGK                 | 2 | 1084.0376 | 6.287 | 0.555 |
| 42 | IPI00021885 | 1 | 42.1 | 0.91 | 0.17 | 521 | ## | FGA Isoform 1 of Fibrinogen alpha chain precursor | LGEFVSETESR                       | 2 | 697.3515  | 3.229 | 0.535 |
| 42 | IPI00021885 | 1 | 42.1 | 0.91 | 0.17 | 521 | ## | FGA Isoform 1 of Fibrinogen alpha chain precursor | MADEAGSEADHEG                     | 2 | 729.7937  | 3.66  | 0.545 |
| 42 | IPI00021885 | 1 | 42.1 | 0.91 | 0.17 | 521 | ## | FGA Isoform 1 of Fibrinogen alpha chain precursor | MADEAGSEADHEGTHSTK                | 2 | 1076.9819 | 6.706 | 0.666 |
| 42 | IPI00021885 | 1 | 42.1 | 0.91 | 0.17 | 521 | ## | FGA Isoform 1 of Fibrinogen alpha chain precursor | MKPVPDLVPGNFK                     | 2 | 931.5397  | 4.21  | 0.473 |
| 42 | IPI00021885 | 1 | 42.1 | 0.91 | 0.17 | 521 | ## | FGA Isoform 1 of Fibrinogen alpha chain precursor | M[147]ADEAGSEADHEGTHSTK           | 2 | 1084.9793 | 5.447 | 0.518 |
| 42 | IPI00021885 | 1 | 42.1 | 0.91 | 0.17 | 521 | ## | FGA Isoform 1 of Fibrinogen alpha chain precursor | VQHIQLLQK                         | 2 | 693.9327  | 3.969 | 0.414 |
| 42 | IPI00021885 | 1 | 42.1 | 0.91 | 0.17 | 521 | ## | FGA Isoform 1 of Fibrinogen alpha chain precursor | n[145]ADSGEGDFLAEGGGVR            | 2 | 840.9009  | 3.405 | 0.373 |
| 42 | IPI00021885 | 1 | 42.1 | 0.91 | 0.17 | 521 | ## | FGA Isoform 1 of Fibrinogen alpha chain precursor | n[145]DEAAFFDTASTGK[272]          | 2 | 824.4089  | 3.8   | 0.461 |
| 42 | IPI00021885 | 1 | 42.1 | 0.91 | 0.17 | 521 | ## | FGA Isoform 1 of Fibrinogen alpha chain precursor | n[145]DSGEGDFLAEGGGVR             | 2 | 805.3824  | 2.892 | 0.259 |
| 42 | IPI00021885 | 1 | 42.1 | 0.91 | 0.17 | 521 | ## | FGA Isoform 1 of Fibrinogen alpha chain precursor | n[145]DSHSLTTNIM[147]EILR         | 2 | 895.4654  | 3.824 | 0.47  |
| 42 | IPI00021885 | 1 | 42.1 | 0.91 | 0.17 | 521 | ## | FGA Isoform 1 of Fibrinogen alpha chain precursor | n[145]EVDLK[272]DYEDQQK[272]      | 2 | 971.5102  | 4.691 | 0.481 |
| 42 | IPI00021885 | 1 | 42.1 | 0.91 | 0.17 | 521 | ## | FGA Isoform 1 of Fibrinogen alpha chain precursor | n[145]GGSTSYGTGSETESPR            | 2 | 858.8933  | 2.609 | 0.458 |
| 42 | IPI00021885 | 1 | 42.1 | 0.91 | 0.17 | 521 | ## | FGA Isoform 1 of Fibrinogen alpha chain precursor | n[145]GLIDEVNQDFTNR               | 2 | 832.9217  | 4.267 | 0.538 |
| 42 | IPI00021885 | 1 | 42.1 | 0.91 | 0.17 | 521 | ## | FGA Isoform 1 of Fibrinogen alpha chain precursor | n[145]GSESGIFTNTK[272]            | 2 | 714.8823  | 4.374 | 0.476 |
| 42 | IPI00021885 | 1 | 42.1 | 0.91 | 0.17 | 521 | ## | FGA Isoform 1 of Fibrinogen alpha chain precursor | n[145]HPDEAAFFDTASTGK[272]        | 2 | 941.4647  | 4.934 | 0.614 |
| 42 | IPI00021885 | 1 | 42.1 | 0.91 | 0.17 | 521 | ## | FGA Isoform 1 of Fibrinogen alpha chain precursor | n[145]HRHPDEAAFFDTASTGK[272]      | 2 | 1088.0447 | 6.28  | 0.539 |
| 42 | IPI00021885 | 1 | 42.1 | 0.91 | 0.17 | 521 | ## | FGA Isoform 1 of Fibrinogen alpha chain precursor | n[145]MADEAGSEADHEGTHSTK[272]     | 2 | 1080.989  | 6.697 | 0.673 |
| 42 | IPI00021885 | 1 | 42.1 | 0.91 | 0.17 | 521 | ## | FGA Isoform 1 of Fibrinogen alpha chain precursor | n[145]NSLFEYQK[272]               | 2 | 658.8581  | 3.41  | 0.234 |
| 42 | IPI00021885 | 1 | 42.1 | 0.91 | 0.17 | 521 | ## | FGA Isoform 1 of Fibrinogen alpha chain precursor | n[145]TFPGFFSPMLGEFVSETESR        | 2 | 1205.0813 | 6.174 | 0.504 |
| 42 | IPI00021885 | 1 | 42.1 | 0.91 | 0.17 | 521 | ## | FGA Isoform 1 of Fibrinogen alpha chain precursor | n[145]TFPGFFSPM[147]LGEFVSETESR   | 2 | 1213.0788 | 5.059 | 0.521 |
| 42 | IPI00021885 | 1 | 42.1 | 0.91 | 0.17 | 521 | ## | FGA Isoform 1 of Fibrinogen alpha chain precursor | n[145]VQHIQLLQK[272]              | 2 | 697.9398  | 3.95  | 0.417 |
| 42 | IPI00021885 | 1 | 42.1 | 0.91 | 0.17 | 521 | ## | FGA Isoform 1 of Fibrinogen alpha chain precursor | DSHSLTTNIMEILR                    | 3 | 590.6453  | 3.079 | 0.134 |
| 42 | IPI00021885 | 1 | 42.1 | 0.91 | 0.17 | 521 | ## | FGA Isoform 1 of Fibrinogen alpha chain precursor | DSHSLTTNIM[147]EILR               | 3 | 595.977   | 4.824 | 0.509 |
| 42 | IPI00021885 | 1 | 42.1 | 0.91 | 0.17 | 521 | ## | FGA Isoform 1 of Fibrinogen alpha chain precursor | ESSSHHPGIAEFPSR                   | 3 | 593.2921  | 3.306 | 0.324 |
| 42 | IPI00021885 | 1 | 42.1 | 0.91 | 0.17 | 521 | ## | FGA Isoform 1 of Fibrinogen alpha chain precursor | GDFSSANNRDNTYNR                   | 3 | 624.2857  | 2.933 | 0.391 |
| 42 | IPI00021885 | 1 | 42.1 | 0.91 | 0.17 | 521 | ## | FGA Isoform 1 of Fibrinogen alpha chain precursor | HPDEAAFFDTASTGK                   | 3 | 625.3075  | 4.688 | 0.385 |
| 42 | IPI00021885 | 1 | 42.1 | 0.91 | 0.17 | 521 | ## | FGA Isoform 1 of Fibrinogen alpha chain precursor | HRHPDEAAFFDTASTGK                 | 3 | 723.0275  | 5.378 | 0.557 |
| 42 | IPI00021885 | 1 | 42.1 | 0.91 | 0.17 | 521 | ## | FGA Isoform 1 of Fibrinogen alpha chain precursor | MADEAGSEADHEGTHSTK                | 3 | 718.3237  | 3.999 | 0.512 |
| 42 | IPI00021885 | 1 | 42.1 | 0.91 | 0.17 | 521 | ## | FGA Isoform 1 of Fibrinogen alpha chain precursor | M[147]ADEAGSEADHEGTHSTK           | 3 | 723.6553  | 3.74  | 0.61  |
| 42 | IPI00021885 | 1 | 42.1 | 0.91 | 0.17 | 521 | ## | FGA Isoform 1 of Fibrinogen alpha chain precursor | NNKDSHSLTTNIM[147]EILR            | 3 | 761.4022  | 4.451 | 0.476 |
| 42 | IPI00021885 | 1 | 42.1 | 0.91 | 0.17 | 521 | ## | FGA Isoform 1 of Fibrinogen alpha chain precursor | TVIGPDGHK                         | 3 | 401.8997  | 1.822 | 0.141 |
| 42 | IPI00021885 | 1 | 42.1 | 0.91 | 0.17 | 521 | ## | FGA Isoform 1 of Fibrinogen alpha chain precursor | n[145]DSHSLTTNIMEILR              | 3 | 591.981   | 4.051 | 0.381 |
| 42 | IPI00021885 | 1 | 42.1 | 0.91 | 0.17 | 521 | ## | FGA Isoform 1 of Fibrinogen alpha chain precursor | n[145]DSHSLTTNIM[147]EILR         | 3 | 597.3127  | 2.419 | 0.288 |
| 42 | IPI00021885 | 1 | 42.1 | 0.91 | 0.17 | 521 | ## | FGA Isoform 1 of Fibrinogen alpha chain precursor | n[145]ESSSHHPGIAEFPSR             | 3 | 594.6278  | 3.825 | 0.452 |
| 42 | IPI00021885 | 1 | 42.1 | 0.91 | 0.17 | 521 | ## | FGA Isoform 1 of Fibrinogen alpha chain precursor | n[145]HRHPDEAAFFDTASTGK[272]      | 3 | 725.6989  | 5.635 | 0.476 |
| 42 | IPI00021885 | 1 | 42.1 | 0.91 | 0.17 | 521 | ## | FGA Isoform 1 of Fibrinogen alpha chain precursor | n[145]MADEAGSEADHEGTHSTK[272]     | 3 | 720.9951  | 3.81  | 0.46  |
| 42 | IPI00021885 | 1 | 42.1 | 0.91 | 0.17 | 521 | ## | FGA Isoform 1 of Fibrinogen alpha chain precursor | n[145]NNK[272]DSHSLTTNIM[147]EILR | 3 | 764.0736  | 4.523 | 0.473 |
| 42 | IPI00021885 | 1 | 42.1 | 0.91 | 0.17 | 521 | ## | FGA Isoform 1 of Fibrinogen alpha chain precursor | n[145]TFPGFFSPM[147]LGEFVSETESR   | 3 | 809.0549  | 2.525 | 0.226 |
| 42 | IPI00021885 | 1 | 42.1 | 0.91 | 0.17 | 521 | ## | FGA Isoform 1 of Fibrinogen alpha chain precursor | n[145]TVIGPDGHK[272]              | 3 | 404.5711  | 1.445 | 0.175 |
| 42 | IPI00021885 | 1 | 42.1 | 0.91 | 0.17 | 521 | ## | FGA Isoform 1 of Fibrinogen alpha chain precursor | n[145]VIEK[272]VQHIQLLQK[272]     | 3 | 670.093   | 4.904 | 0.569 |

|    |             |   |      |      |      |     |    |                                                   |                                       |   |           |       |       |
|----|-------------|---|------|------|------|-----|----|---------------------------------------------------|---------------------------------------|---|-----------|-------|-------|
| 42 | IPI00021885 | 1 | 42.1 | 0.91 | 0.17 | 521 | ## | FGA Isoform 1 of Fibrinogen alpha chain precursor | MADEAGSEADHEGTHSTK                    | 4 | 538.9946  | 2.614 | 0.201 |
| 42 | IPI00021885 | 1 | 42.1 | 0.91 | 0.17 | 521 | ## | FGA Isoform 1 of Fibrinogen alpha chain precursor | M[147]ADEAGSEADHEGTHSTK               | 4 | 542.9933  | 4.717 | 0.451 |
| 42 | IPI00021885 | 1 | 42.1 | 0.91 | 0.17 | 521 | ## | FGA Isoform 1 of Fibrinogen alpha chain precursor | n[145]GSESGIFTNTK[272]ESSSHHPGIAEFPSR | 4 | 762.632   | 4.499 | 0.483 |
| 42 | IPI00021885 | 1 | 42.1 | 0.91 | 0.17 | 521 | ## | FGA Isoform 1 of Fibrinogen alpha chain precursor | n[145]MADEAGSEADHEGTHSTK[272]         | 4 | 540.9981  | 5.594 | 0.469 |
| 42 | IPI00021885 | 1 | 42.1 | 0.91 | 0.17 | 521 | ## | FGA Isoform 1 of Fibrinogen alpha chain precursor | n[145]MADEAGSEADHEGTHSTK[272]JR       | 4 | 580.0234  | 3.286 | 0.385 |
| 42 | IPI00021885 | 1 | 42.1 | 0.91 | 0.17 | 521 | ## | FGA Isoform 1 of Fibrinogen alpha chain precursor | n[145]VIEK[272]VQHIQLLQK[272]         | 4 | 502.8216  | 2.975 | 0.454 |
| 42 | IPI00021885 | 1 | 42.1 | 0.91 | 0.17 | 521 | ## | FGA Isoform 1 of Fibrinogen alpha chain precursor | n[145]GSESGIFTNTK[272]ESSSHHPGIAEFPSR | 5 | 610.3071  | 3.584 | 0.327 |
| 42 | IPI00021885 | 1 | 42.1 | 0.91 | 0.17 | 521 | ## | FGA Isoform 1 of Fibrinogen alpha chain precursor | n[145]ESSSHHPGIAEFPSR                 | 2 | 891.438   | 3.128 | 0.44  |
| 42 | IPI00021885 | 1 | 42.1 | 0.91 | 0.17 | 521 | ## | FGA Isoform 1 of Fibrinogen alpha chain precursor | EKVTSGSTTTTR                          | 3 | 516.6178  | 2.956 | 0.347 |
| 42 | IPI00021885 | 1 | 42.1 | 0.91 | 0.17 | 521 | ## | FGA Isoform 1 of Fibrinogen alpha chain precursor | VIEKVQHIQLLQK                         | 3 | 666.0859  | 3.023 | 0.427 |
| 42 | IPI00021885 | 1 | 42.1 | 0.91 | 0.17 | 521 | ## | FGA Isoform 1 of Fibrinogen alpha chain precursor | VQHIQLLQK                             | 3 | 462.9575  | 3.29  | 0.152 |
| 42 | IPI00021885 | 1 | 42.1 | 0.91 | 0.17 | 521 | ## | FGA Isoform 1 of Fibrinogen alpha chain precursor | n[145]EVDLK[272]DYEDQQK[272]          | 3 | 648.0092  | 3.613 | 0.285 |
| 42 | IPI00021885 | 1 | 42.1 | 0.91 | 0.17 | 521 | ## | FGA Isoform 1 of Fibrinogen alpha chain precursor | n[145]MELERPPGGNEITR                  | 3 | 549.2865  | 2.813 | 0.277 |
| 42 | IPI00021885 | 1 | 42.1 | 0.91 | 0.17 | 521 | ## | FGA Isoform 1 of Fibrinogen alpha chain precursor | n[145]JNKK[272]DSHSLTTNIMEILR         | 3 | 758.742   | 4.175 | 0.393 |
| 42 | IPI00021885 | 1 | 42.1 | 0.91 | 0.17 | 521 | ## | FGA Isoform 1 of Fibrinogen alpha chain precursor | n[145]TVIGPDGHK[272]EVTK[272]         | 3 | 605.023   | 3.581 | 0.406 |
| 42 | IPI00021885 | 1 | 42.1 | 0.91 | 0.17 | 521 | ## | FGA Isoform 1 of Fibrinogen alpha chain precursor | n[145]VQHIQLLQK[272]                  | 3 | 465.6289  | 4.049 | 0.272 |
| 42 | IPI00021885 | 1 | 42.1 | 0.91 | 0.17 | 521 | ## | FGA Isoform 1 of Fibrinogen alpha chain precursor | ESSSHHPGIAEFPSR                       | 4 | 445.2209  | 1.855 | 0.021 |
| 42 | IPI00021885 | 1 | 42.1 | 0.91 | 0.17 | 521 | ## | FGA Isoform 1 of Fibrinogen alpha chain precursor | VIEKVQHIQLLQK                         | 4 | 499.8162  | 2.837 | 0.379 |
| 42 | IPI00021885 | 1 | 42.1 | 0.91 | 0.17 | 521 | ## | FGA Isoform 1 of Fibrinogen alpha chain precursor | n[145]TVIGPDGHK[272]EVTK[272]         | 4 | 454.0191  | 3.071 | 0.352 |
| 42 | IPI00021885 | 1 | 42.1 | 0.91 | 0.17 | 521 | ## | FGA Isoform 1 of Fibrinogen alpha chain precursor | M[147]KVPVPLVPGNFK                    | 2 | 939.5372  | 2.909 | 0.232 |
| 42 | IPI00021885 | 1 | 42.1 | 0.91 | 0.17 | 521 | ## | FGA Isoform 1 of Fibrinogen alpha chain precursor | NSLFEYQK                              | 2 | 654.851   | 2.693 | 0.245 |
| 42 | IPI00021885 | 1 | 42.1 | 0.91 | 0.17 | 521 | ## | FGA Isoform 1 of Fibrinogen alpha chain precursor | n[145]DSHSLTTNIMEILR                  | 2 | 887.4679  | 4.245 | 0.379 |
| 42 | IPI00021885 | 1 | 42.1 | 0.91 | 0.17 | 521 | ## | FGA Isoform 1 of Fibrinogen alpha chain precursor | n[145]MK[272]PVPDLVPGNFK[272]         | 2 | 937.5504  | 3.595 | 0.454 |
| 42 | IPI00021885 | 1 | 42.1 | 0.91 | 0.17 | 521 | ## | FGA Isoform 1 of Fibrinogen alpha chain precursor | n[145]TVIGPDGHK[272]                  | 2 | 606.353   | 1.416 | 0.161 |
| 42 | IPI00021885 | 1 | 42.1 | 0.91 | 0.17 | 521 | ## | FGA Isoform 1 of Fibrinogen alpha chain precursor | MELERPPGGNEITR                        | 3 | 547.9508  | 2.604 | 0.115 |
| 42 | IPI00021885 | 1 | 42.1 | 0.91 | 0.17 | 521 | ## | FGA Isoform 1 of Fibrinogen alpha chain precursor | NNKDSHSLTTNIMEILR                     | 3 | 756.0706  | 3.682 | 0.303 |
| 42 | IPI00021885 | 1 | 42.1 | 0.91 | 0.17 | 521 | ## | FGA Isoform 1 of Fibrinogen alpha chain precursor | n[145]EK[272]VTSGSTTTTR               | 3 | 519.2892  | 2.722 | 0.352 |
| 42 | IPI00021885 | 1 | 42.1 | 0.91 | 0.17 | 521 | ## | FGA Isoform 1 of Fibrinogen alpha chain precursor | AQLVDMK                               | 2 | 542.8128  | 2.492 | 0.234 |
| 42 | IPI00021885 | 1 | 42.1 | 0.91 | 0.17 | 521 | ## | FGA Isoform 1 of Fibrinogen alpha chain precursor | GDSTFESK                              | 2 | 575.7906  | 2.129 | 0.189 |
| 42 | IPI00021885 | 1 | 42.1 | 0.91 | 0.17 | 521 | ## | FGA Isoform 1 of Fibrinogen alpha chain precursor | MELERPPGGNEITR                        | 2 | 821.4225  | 3.414 | 0.324 |
| 42 | IPI00021885 | 1 | 42.1 | 0.91 | 0.17 | 521 | ## | FGA Isoform 1 of Fibrinogen alpha chain precursor | QFTSSTSYNR                            | 2 | 665.823   | 2.473 | 0.14  |
| 42 | IPI00021885 | 1 | 42.1 | 0.91 | 0.17 | 521 | ## | FGA Isoform 1 of Fibrinogen alpha chain precursor | n[145]AQLVDMK[272]                    | 2 | 546.8199  | 2.625 | 0.339 |
| 42 | IPI00021885 | 1 | 42.1 | 0.91 | 0.17 | 521 | ## | FGA Isoform 1 of Fibrinogen alpha chain precursor | n[145]GDSTFESK[272]                   | 2 | 579.7977  | 2.411 | 0.225 |
| 42 | IPI00021885 | 1 | 42.1 | 0.91 | 0.17 | 521 | ## | FGA Isoform 1 of Fibrinogen alpha chain precursor | n[145]GGSTSYGTGSETESPR                | 3 | 572.9313  | 2.69  | 0.284 |
| 42 | IPI00021885 | 1 | 42.1 | 0.91 | 0.17 | 521 | ## | FGA Isoform 1 of Fibrinogen alpha chain precursor | n[145]MK[272]PVPDLVPGNFK[272]         | 3 | 625.3693  | 2.773 | 0.214 |
| 42 | IPI00021885 | 1 | 42.1 | 0.91 | 0.17 | 521 | ## | FGA Isoform 1 of Fibrinogen alpha chain precursor | NSLFEYQK                              | 1 | 1308.6948 | 2.743 | 0.277 |
| 42 | IPI00021885 | 1 | 42.1 | 0.91 | 0.17 | 521 | ## | FGA Isoform 1 of Fibrinogen alpha chain precursor | DYEDQQK                               | 2 | 603.2935  | 2.813 | 0.314 |
| 42 | IPI00021885 | 1 | 42.1 | 0.91 | 0.17 | 521 | ## | FGA Isoform 1 of Fibrinogen alpha chain precursor | n[145]DYEDQQK[272]                    | 2 | 607.3006  | 2.769 | 0.287 |
| 42 | IPI00021885 | 1 | 42.1 | 0.91 | 0.17 | 521 | ## | FGA Isoform 1 of Fibrinogen alpha chain precursor | n[145]MELERPPGGNEITR                  | 2 | 823.4261  | 2.05  | 0.114 |
| 42 | IPI00021885 | 1 | 42.1 | 0.91 | 0.17 | 521 | ## | FGA Isoform 1 of Fibrinogen alpha chain precursor | GSESGIFTNTKSSSHHPGIAEFPSR             | 4 | 760.6285  | 3.832 | 0.36  |
| 42 | IPI00021885 | 1 | 42.1 | 0.91 | 0.17 | 521 | ## | FGA Isoform 1 of Fibrinogen alpha chain precursor | n[145]JNKK[272]DSHSLTTNIM[147]EILR    | 4 | 573.3071  | 3.491 | 0.24  |
| 42 | IPI00021885 | 1 | 42.1 | 0.91 | 0.17 | 521 | ## | FGA Isoform 1 of Fibrinogen alpha chain precursor | GSESGIFTNTKSSSHHPGIAEFPSR             | 5 | 608.7042  | 2.917 | 0.147 |
| 42 | IPI00021885 | 1 | 42.1 | 0.91 | 0.17 | 521 | ## | FGA Isoform 1 of Fibrinogen alpha chain precursor | GDSTFESK                              | 1 | 1150.574  | 2.472 | 0.337 |
| 42 | IPI00021885 | 1 | 42.1 | 0.91 | 0.17 | 521 | ## | FGA Isoform 1 of Fibrinogen alpha chain precursor | n[145]NSLFEYQK[272]                   | 1 | 1316.709  | 2.425 | 0.305 |
| 42 | IPI00021885 | 1 | 42.1 | 0.91 | 0.17 | 521 | ## | FGA Isoform 1 of Fibrinogen alpha chain precursor | GDFSSANNR                             | 2 | 554.2625  | 1.9   | 0.267 |
| 42 | IPI00021885 | 1 | 42.1 | 0.91 | 0.17 | 521 | ## | FGA Isoform 1 of Fibrinogen alpha chain precursor | TVIGPDGHK                             | 2 | 602.3459  | 3.099 | 0.243 |
| 42 | IPI00021885 | 1 | 42.1 | 0.91 | 0.17 | 521 | ## | FGA Isoform 1 of Fibrinogen alpha chain precursor | n[145]GDSTFESK[272]                   | 1 | 1158.5882 | 2.485 | 0.314 |
| 42 | IPI00021885 | 1 | 42.1 | 0.91 | 0.17 | 521 | ## | FGA Isoform 1 of Fibrinogen alpha chain precursor | n[145]GDFSSANNRDNTYNR                 | 3 | 625.6214  | 1.924 | 0.203 |

|    |             |   |      |      |      |     |    |                                                   |                            |   |          |       |       |
|----|-------------|---|------|------|------|-----|----|---------------------------------------------------|----------------------------|---|----------|-------|-------|
| 42 | IPI00021885 | 1 | 42.1 | 0.91 | 0.17 | 521 | ## | FGA Isoform 1 of Fibrinogen alpha chain precursor | ALTDMPQMR                  | 2 | 601.8047 | 2.677 | 0.31  |
| 42 | IPI00021885 | 1 | 42.1 | 0.91 | 0.17 | 521 | ## | FGA Isoform 1 of Fibrinogen alpha chain precursor | n[145]QFTSSTSYNR           | 2 | 667.8265 | 2.121 | 0.161 |
| 42 | IPI00021885 | 1 | 42.1 | 0.91 | 0.17 | 521 | ## | FGA Isoform 1 of Fibrinogen alpha chain precursor | EVDLKDYEDQQK               | 3 | 644.0021 | 2.183 | 0.12  |
| 42 | IPI00021885 | 1 | 42.1 | 0.91 | 0.17 | 521 | ## | FGA Isoform 1 of Fibrinogen alpha chain precursor | TVIGPDGHKEVTK              | 3 | 601.0159 | 2.863 | 0.286 |
| 42 | IPI00021885 | 1 | 42.1 | 0.91 | 0.17 | 521 | ## | FGA Isoform 1 of Fibrinogen alpha chain precursor | n[145]ALTDMPQMR            | 2 | 603.8082 | 2.551 | 0.317 |
| 42 | IPI00021885 | 1 | 42.1 | 0.91 | 0.17 | 521 | ## | FGA Isoform 1 of Fibrinogen alpha chain precursor | n[145]GDFSSANNR            | 2 | 556.2661 | 1.501 | 0.093 |
| 42 | IPI00021885 | 1 | 42.1 | 0.91 | 0.17 | 521 | ## | FGA Isoform 1 of Fibrinogen alpha chain precursor | n[145]ESSHHPGIAEFPSR       | 4 | 446.2227 | 2.822 | 0.102 |
| 42 | IPI00021885 | 1 | 42.1 | 0.91 | 0.17 | 521 | ## | FGA Isoform 1 of Fibrinogen alpha chain precursor | ALTDM[147]PQM[147]R        | 2 | 617.7996 | 1.729 | 0.064 |
| 42 | IPI00021885 | 1 | 42.1 | 0.91 | 0.17 | 521 | ## | FGA Isoform 1 of Fibrinogen alpha chain precursor | QLEQVIK                    | 2 | 604.8717 | 2.808 | 0.125 |
| 42 | IPI00021885 | 1 | 42.1 | 0.91 | 0.17 | 521 | ## | FGA Isoform 1 of Fibrinogen alpha chain precursor | n[145]QLEQVIK[272]         | 2 | 608.8788 | 3.106 | 0.121 |
| 42 | IPI00021885 | 1 | 42.1 | 0.91 | 0.17 | 521 | ## | FGA Isoform 1 of Fibrinogen alpha chain precursor | AQLVDM[147]K               | 2 | 550.8103 | 1.919 | 0.058 |
| 42 | IPI00021885 | 1 | 42.1 | 0.91 | 0.17 | 521 | ## | FGA Isoform 1 of Fibrinogen alpha chain precursor | n[145]RLEVDIDIK[272]       | 3 | 463.6166 | 2.281 | 0.007 |
| 42 | IPI00021885 | 1 | 42.1 | 0.91 | 0.17 | 521 | ## | FGA Isoform 1 of Fibrinogen alpha chain precursor | n[145]ALTDM[147]PQM[147]R  | 2 | 619.8031 | 1.926 | 0.236 |
| 42 | IPI00021885 | 1 | 42.1 | 0.91 | 0.17 | 521 | ## | FGA Isoform 1 of Fibrinogen alpha chain precursor | n[145]AQLVDM[147]K[272]    | 2 | 554.8174 | 1.326 | 0.094 |
| 42 | IPI00021885 | 1 | 42.1 | 0.91 | 0.17 | 521 | ## | FGA Isoform 1 of Fibrinogen alpha chain precursor | n[145]SSHHPGIAEFPSR        | 3 | 522.6029 | 3.548 | 0.317 |
| 42 | IPI00021885 | 1 | 42.1 | 0.91 | 0.17 | 521 | ## | FGA Isoform 1 of Fibrinogen alpha chain precursor | n[145]VTSGSTTTTR           | 2 | 577.8103 | 2.359 | 0.298 |
| 42 | IPI00021885 | 1 | 42.1 | 0.91 | 0.17 | 521 | ## | FGA Isoform 1 of Fibrinogen alpha chain precursor | IRPLVTQ                    | 2 | 483.8084 | 1.853 | 0.268 |
| 42 | IPI00021885 | 1 | 42.1 | 0.91 | 0.17 | 521 | ## | FGA Isoform 1 of Fibrinogen alpha chain precursor | n[145]QHLPLIK[272]         | 2 | 568.8734 | 2.069 | 0.211 |
| 42 | IPI00021885 | 1 | 42.1 | 0.91 | 0.17 | 521 | ## | FGA Isoform 1 of Fibrinogen alpha chain precursor | NSLFEYQK                   | 3 | 436.9031 | 3.095 | 0.073 |
| 42 | IPI00021885 | 1 | 42.1 | 0.91 | 0.17 | 521 | ## | FGA Isoform 1 of Fibrinogen alpha chain precursor | VTSGSTTTTR                 | 2 | 575.8068 | 2.182 | 0.231 |
| 42 | IPI00021885 | 1 | 42.1 | 0.91 | 0.17 | 521 | ## | FGA Isoform 1 of Fibrinogen alpha chain precursor | RLEVDIDIK                  | 1 | 1380.821 | 1.971 | 0.129 |
| 42 | IPI00021885 | 1 | 42.1 | 0.91 | 0.17 | 521 | ## | FGA Isoform 1 of Fibrinogen alpha chain precursor | M[147]ELERPPGNEITR         | 3 | 553.2824 | 1.462 | 0.094 |
| 42 | IPI00021885 | 1 | 42.1 | 0.91 | 0.17 | 521 | ## | FGA Isoform 1 of Fibrinogen alpha chain precursor | n[145]SSHHPGIAEFPSR        | 3 | 493.5922 | 2.65  | 0.355 |
| 42 | IPI00021885 | 1 | 42.1 | 0.91 | 0.17 | 521 | ## | FGA Isoform 1 of Fibrinogen alpha chain precursor | n[145]ALTDM[147]PQMR       | 2 | 611.8057 | 2.417 | 0.185 |
| 42 | IPI00021885 | 1 | 42.1 | 0.91 | 0.17 | 521 | ## | FGA Isoform 1 of Fibrinogen alpha chain precursor | n[145]VPPEWK[272]          | 2 | 522.3101 | 2.094 | 0.184 |
| 42 | IPI00021885 | 1 | 42.1 | 0.91 | 0.17 | 521 | ## | FGA Isoform 1 of Fibrinogen alpha chain precursor | SSHHPGIAEFPSR              | 3 | 521.2672 | 2.949 | 0.317 |
| 42 | IPI00021885 | 1 | 42.1 | 0.91 | 0.17 | 521 | ## | FGA Isoform 1 of Fibrinogen alpha chain precursor | AQLVDM[147]KR              | 2 | 628.8609 | 2.307 | 0.12  |
| 42 | IPI00021885 | 1 | 42.1 | 0.91 | 0.17 | 521 | ## | FGA Isoform 1 of Fibrinogen alpha chain precursor | RLEVDIDIK                  | 3 | 460.9452 | 2.451 | 0.115 |
| 42 | IPI00021885 | 1 | 42.1 | 0.91 | 0.17 | 521 | ## | FGA Isoform 1 of Fibrinogen alpha chain precursor | n[145]MADEAGSEADHEGTH      | 3 | 567.5695 | 2.603 | 0.331 |
| 42 | IPI00021885 | 1 | 42.1 | 0.91 | 0.17 | 521 | ## | FGA Isoform 1 of Fibrinogen alpha chain precursor | M[147]KVPDLVPGNFK          | 3 | 626.6939 | 2.923 | 0.092 |
| 42 | IPI00021885 | 1 | 42.1 | 0.91 | 0.17 | 521 | ## | FGA Isoform 1 of Fibrinogen alpha chain precursor | n[145]ALTDMPQM[147]R       | 2 | 611.8057 | 2.534 | 0.334 |
| 42 | IPI00021885 | 1 | 42.1 | 0.91 | 0.17 | 521 | ## | FGA Isoform 1 of Fibrinogen alpha chain precursor | n[145]DILPSR               | 2 | 422.7541 | 1.772 | 0.006 |
| 42 | IPI00021885 | 1 | 42.1 | 0.91 | 0.17 | 521 | ## | FGA Isoform 1 of Fibrinogen alpha chain precursor | n[145]SHSLTTNIM[147]EILR   | 3 | 558.9704 | 3.306 | 0.261 |
| 42 | IPI00021885 | 1 | 42.1 | 0.91 | 0.17 | 521 | ## | FGA Isoform 1 of Fibrinogen alpha chain precursor | RLEVDIDIK                  | 2 | 690.9141 | 2.224 | 0.05  |
| 42 | IPI00021885 | 1 | 42.1 | 0.91 | 0.17 | 521 | ## | FGA Isoform 1 of Fibrinogen alpha chain precursor | n[145]FTSSTSYNR            | 2 | 603.7972 | 2.966 | 0.478 |
| 42 | IPI00021885 | 1 | 42.1 | 0.91 | 0.17 | 521 | ## | FGA Isoform 1 of Fibrinogen alpha chain precursor | n[145]LVTSK[272]GDK[272]   | 2 | 640.401  | 2.432 | 0.265 |
| 42 | IPI00021885 | 1 | 42.1 | 0.91 | 0.17 | 521 | ## | FGA Isoform 1 of Fibrinogen alpha chain precursor | VPPEWK                     | 2 | 518.303  | 1.867 | 0.106 |
| 42 | IPI00021885 | 1 | 42.1 | 0.91 | 0.17 | 521 | ## | FGA Isoform 1 of Fibrinogen alpha chain precursor | n[145]PGSTGTWNPSSER        | 2 | 788.8773 | 4.012 | 0.388 |
| 42 | IPI00021885 | 1 | 42.1 | 0.91 | 0.17 | 521 | ## | FGA Isoform 1 of Fibrinogen alpha chain precursor | n[145]RLEVDIDIK[272]       | 2 | 694.9212 | 2.295 | 0.066 |
| 42 | IPI00021885 | 1 | 42.1 | 0.91 | 0.17 | 521 | ## | FGA Isoform 1 of Fibrinogen alpha chain precursor | n[145]AQLVDM[147]K[272]R   | 3 | 422.2477 | 1.688 | 0.167 |
| 42 | IPI00021885 | 1 | 42.1 | 0.91 | 0.17 | 521 | ## | FGA Isoform 1 of Fibrinogen alpha chain precursor | n[145]RK[272]VIEK[272]     | 4 | 301.958  | 2.259 | 0.086 |
| 42 | IPI00021885 | 1 | 42.1 | 0.91 | 0.17 | 521 | ## | FGA Isoform 1 of Fibrinogen alpha chain precursor | ALTDMPQM[147]R             | 2 | 609.8021 | 2.388 | 0.302 |
| 42 | IPI00021885 | 1 | 42.1 | 0.91 | 0.17 | 521 | ## | FGA Isoform 1 of Fibrinogen alpha chain precursor | n[145]TFPGFFSPMLGEFVSETESR | 3 | 803.7233 | 2.611 | 0.087 |
| 42 | IPI00021885 | 1 | 42.1 | 0.91 | 0.17 | 521 | ## | FGA Isoform 1 of Fibrinogen alpha chain precursor | n[145]SLTTNIM[147]EILR     | 2 | 725.9064 | 3.513 | 0.247 |
| 42 | IPI00021885 | 1 | 42.1 | 0.91 | 0.17 | 521 | ## | FGA Isoform 1 of Fibrinogen alpha chain precursor | n[145]LK[272]NSLFEYQK[272] | 3 | 568.0015 | 2.602 | 0.122 |
| 42 | IPI00021885 | 1 | 42.1 | 0.91 | 0.17 | 521 | ## | FGA Isoform 1 of Fibrinogen alpha chain precursor | MKPVPLVPGNFK               | 3 | 621.3622 | 2.441 | 0.041 |
| 42 | IPI00021885 | 1 | 42.1 | 0.91 | 0.17 | 521 | ## | FGA Isoform 1 of Fibrinogen alpha chain precursor | DEAAFFDTASTGK              | 2 | 820.4018 | 3.728 | 0.412 |
| 42 | IPI00021885 | 1 | 42.1 | 0.91 | 0.17 | 521 | ## | FGA Isoform 1 of Fibrinogen alpha chain precursor | n[145]VSEDLR               | 2 | 431.7412 | 1.701 | 0.064 |

|    |             |   |      |      |      |     |    |                                                   |                          |   |           |       |       |
|----|-------------|---|------|------|------|-----|----|---------------------------------------------------|--------------------------|---|-----------|-------|-------|
| 42 | IPI00021885 | 1 | 42.1 | 0.91 | 0.17 | 521 | ## | FGA Isoform 1 of Fibrinogen alpha chain precursor | DLIPSR                   | 2 | 420.7505  | 1.92  | 0.016 |
| 42 | IPI00021885 | 1 | 42.1 | 0.91 | 0.17 | 521 | ## | FGA Isoform 1 of Fibrinogen alpha chain precursor | n[145]NSLFEYQK[272]      | 3 | 439.5745  | 1.956 | 0.106 |
| 42 | IPI00021885 | 1 | 42.1 | 0.91 | 0.17 | 521 | ## | FGA Isoform 1 of Fibrinogen alpha chain precursor | n[145]SLTTNIMEILR        | 2 | 717.909   | 3.462 | 0.215 |
| 42 | IPI00021885 | 1 | 42.1 | 0.91 | 0.17 | 521 | ## | FGA Isoform 1 of Fibrinogen alpha chain precursor | LVTSKGDKELR              | 3 | 556.0052  | 2.41  | 0.125 |
| 42 | IPI00021885 | 1 | 42.1 | 0.91 | 0.17 | 521 | ## | FGA Isoform 1 of Fibrinogen alpha chain precursor | n[145]STS YGTGSETESPR    | 2 | 801.8718  | 2.758 | 0.465 |
| 42 | IPI00021885 | 1 | 42.1 | 0.91 | 0.17 | 521 | ## | FGA Isoform 1 of Fibrinogen alpha chain precursor | VSEDLR                   | 2 | 429.7376  | 1.918 | 0.04  |
| 42 | IPI00021885 | 1 | 42.1 | 0.91 | 0.17 | 521 | ## | FGA Isoform 1 of Fibrinogen alpha chain precursor | GSESGIFTNTK              | 3 | 474.2526  | 2.521 | 0.048 |
| 42 | IPI00021885 | 1 | 42.1 | 0.91 | 0.17 | 521 | ## | FGA Isoform 1 of Fibrinogen alpha chain precursor | SLTTNIM[147]EILR         | 2 | 723.9029  | 3.574 | 0.338 |
| 42 | IPI00021885 | 1 | 42.1 | 0.91 | 0.17 | 521 | ## | FGA Isoform 1 of Fibrinogen alpha chain precursor | LVTSKGDK                 | 2 | 634.3903  | 2.249 | 0.183 |
| 42 | IPI00021885 | 1 | 42.1 | 0.91 | 0.17 | 521 | ## | FGA Isoform 1 of Fibrinogen alpha chain precursor | n[145]GDFSSANNRDNNTYNR   | 2 | 937.9285  | 2.699 | 0.392 |
| 42 | IPI00021885 | 1 | 42.1 | 0.91 | 0.17 | 521 | ## | FGA Isoform 1 of Fibrinogen alpha chain precursor | n[145]RLEVDIDIK[272]     | 1 | 1388.8352 | 1.694 | 0.22  |
| 42 | IPI00021885 | 1 | 42.1 | 0.91 | 0.17 | 521 | ## | FGA Isoform 1 of Fibrinogen alpha chain precursor | EVDLK                    | 2 | 442.266   | 1.828 | 0.087 |
| 42 | IPI00021885 | 1 | 42.1 | 0.91 | 0.17 | 521 | ## | FGA Isoform 1 of Fibrinogen alpha chain precursor | n[145]DFLAEGGGVR         | 2 | 582.8101  | 3.228 | 0.313 |
| 42 | IPI00021885 | 1 | 42.1 | 0.91 | 0.17 | 521 | ## | FGA Isoform 1 of Fibrinogen alpha chain precursor | KVIEK                    | 2 | 518.8476  | 2.301 | 0.075 |
| 42 | IPI00021885 | 1 | 42.1 | 0.91 | 0.17 | 521 | ## | FGA Isoform 1 of Fibrinogen alpha chain precursor | ALTDM[147]PQMR           | 2 | 609.8021  | 1.557 | 0.064 |
| 42 | IPI00021885 | 1 | 42.1 | 0.91 | 0.17 | 521 | ## | FGA Isoform 1 of Fibrinogen alpha chain precursor | n[145]LVTSK[272]         | 2 | 418.2782  | 1.601 | 0.179 |
| 42 | IPI00021885 | 1 | 42.1 | 0.91 | 0.17 | 521 | ## | FGA Isoform 1 of Fibrinogen alpha chain precursor | QHLPLIK                  | 2 | 564.8663  | 1.509 | 0.028 |
| 42 | IPI00021885 | 1 | 42.1 | 0.91 | 0.17 | 521 | ## | FGA Isoform 1 of Fibrinogen alpha chain precursor | n[145]LGEFVSETESR        | 2 | 699.3551  | 2.83  | 0.283 |
| 42 | IPI00021885 | 1 | 42.1 | 0.91 | 0.17 | 521 | ## | FGA Isoform 1 of Fibrinogen alpha chain precursor | n[145]SSHHPGIAEFPSR      | 2 | 783.4007  | 3.391 | 0.353 |
| 42 | IPI00021885 | 1 | 42.1 | 0.91 | 0.17 | 521 | ## | FGA Isoform 1 of Fibrinogen alpha chain precursor | n[145]SGEGDFLAEGGGVR     | 2 | 747.8689  | 2.9   | 0.255 |
| 42 | IPI00021885 | 1 | 42.1 | 0.91 | 0.17 | 521 | ## | FGA Isoform 1 of Fibrinogen alpha chain precursor | M[147]ELERPGGNEITR       | 2 | 829.42    | 1.239 | 0.009 |
| 42 | IPI00021885 | 1 | 42.1 | 0.91 | 0.17 | 521 | ## | FGA Isoform 1 of Fibrinogen alpha chain precursor | n[145]GEFVSETESR         | 2 | 642.8131  | 2.521 | 0.302 |
| 42 | IPI00021885 | 1 | 42.1 | 0.91 | 0.17 | 521 | ## | FGA Isoform 1 of Fibrinogen alpha chain precursor | LKDYEDQQK                | 3 | 529.6228  | 2.765 | 0.227 |
| 42 | IPI00021885 | 1 | 42.1 | 0.91 | 0.17 | 521 | ## | FGA Isoform 1 of Fibrinogen alpha chain precursor | LKNSLFEYQK               | 3 | 563.9944  | 2.016 | 0.102 |
| 42 | IPI00021885 | 1 | 42.1 | 0.91 | 0.17 | 521 | ## | FGA Isoform 1 of Fibrinogen alpha chain precursor | n[145]TFPGFFSPM[147]LG   | 2 | 680.84    | 2.051 | 0.363 |
| 42 | IPI00021885 | 1 | 42.1 | 0.91 | 0.17 | 521 | ## | FGA Isoform 1 of Fibrinogen alpha chain precursor | DSHSLTTNIM[147]          | 2 | 637.8059  | 2.491 | 0.224 |
| 42 | IPI00021885 | 1 | 42.1 | 0.91 | 0.17 | 521 | ## | FGA Isoform 1 of Fibrinogen alpha chain precursor | n[145]DSHSLTTNIMEIL      | 2 | 809.4174  | 2.186 | 0.278 |
| 42 | IPI00021885 | 1 | 42.1 | 0.91 | 0.17 | 521 | ## | FGA Isoform 1 of Fibrinogen alpha chain precursor | SLFEYQK                  | 2 | 597.8295  | 2.571 | 0.123 |
| 42 | IPI00021885 | 1 | 42.1 | 0.91 | 0.17 | 521 | ## | FGA Isoform 1 of Fibrinogen alpha chain precursor | VSEDLRSR                 | 2 | 551.3042  | 1.826 | 0.061 |
| 42 | IPI00021885 | 1 | 42.1 | 0.91 | 0.17 | 521 | ## | FGA Isoform 1 of Fibrinogen alpha chain precursor | n[145]SLFEYQK[272]       | 2 | 601.8366  | 2.419 | 0.131 |
| 42 | IPI00021885 | 1 | 42.1 | 0.91 | 0.17 | 521 | ## | FGA Isoform 1 of Fibrinogen alpha chain precursor | n[145]SSHHPGIAEFPSR      | 3 | 551.6136  | 2.751 | 0.153 |
| 42 | IPI00021885 | 1 | 42.1 | 0.91 | 0.17 | 521 | ## | FGA Isoform 1 of Fibrinogen alpha chain precursor | n[145]RK[272]VIEK[272]   | 3 | 402.2749  | 1.869 | 0.022 |
| 42 | IPI00021885 | 1 | 42.1 | 0.91 | 0.17 | 521 | ## | FGA Isoform 1 of Fibrinogen alpha chain precursor | TVIGPDG                  | 1 | 798.4357  | 2.272 | 0.392 |
| 42 | IPI00021885 | 1 | 42.1 | 0.91 | 0.17 | 521 | ## | FGA Isoform 1 of Fibrinogen alpha chain precursor | n[145]HPDEAAFFDASTG      | 2 | 805.3662  | 2.208 | 0.207 |
| 42 | IPI00021885 | 1 | 42.1 | 0.91 | 0.17 | 521 | ## | FGA Isoform 1 of Fibrinogen alpha chain precursor | SSHHPGIAEFPSR            | 2 | 781.3972  | 2.803 | 0.299 |
| 42 | IPI00021885 | 1 | 42.1 | 0.91 | 0.17 | 521 | ## | FGA Isoform 1 of Fibrinogen alpha chain precursor | RKVIEK                   | 2 | 596.8981  | 1.565 | 0.018 |
| 42 | IPI00021885 | 1 | 42.1 | 0.91 | 0.17 | 521 | ## | FGA Isoform 1 of Fibrinogen alpha chain precursor | n[145]GSESGIFTNTK[272]   | 3 | 476.924   | 1.869 | 0.017 |
| 42 | IPI00021885 | 1 | 42.1 | 0.91 | 0.17 | 521 | ## | FGA Isoform 1 of Fibrinogen alpha chain precursor | n[145]EVNQDFTNR          | 2 | 633.8134  | 1.923 | 0.25  |
| 42 | IPI00021885 | 1 | 42.1 | 0.91 | 0.17 | 521 | ## | FGA Isoform 1 of Fibrinogen alpha chain precursor | DSHSLTTNIM               | 2 | 629.8085  | 2.306 | 0.189 |
| 42 | IPI00021885 | 1 | 42.1 | 0.91 | 0.17 | 521 | ## | FGA Isoform 1 of Fibrinogen alpha chain precursor | n[145]TFPGFFSPM[147]     | 2 | 595.7873  | 1.734 | 0.181 |
| 42 | IPI00021885 | 1 | 42.1 | 0.91 | 0.17 | 521 | ## | FGA Isoform 1 of Fibrinogen alpha chain precursor | n[145]SHSLTTNIM[147]EILR | 2 | 837.9519  | 2.738 | 0.133 |
| 42 | IPI00021885 | 1 | 42.1 | 0.91 | 0.17 | 521 | ## | FGA Isoform 1 of Fibrinogen alpha chain precursor | ALTDM[147]PQM[147]JR     | 3 | 412.2021  | 1.446 | 0.02  |
| 42 | IPI00021885 | 1 | 42.1 | 0.91 | 0.17 | 521 | ## | FGA Isoform 1 of Fibrinogen alpha chain precursor | n[145]IMEILR             | 2 | 459.7818  | 2.002 | 0.079 |
| 42 | IPI00021885 | 1 | 42.1 | 0.91 | 0.17 | 521 | ## | FGA Isoform 1 of Fibrinogen alpha chain precursor | n[145]IM[147]EILR        | 2 | 467.7793  | 2.077 | 0.061 |
| 42 | IPI00021885 | 1 | 42.1 | 0.91 | 0.17 | 521 | ## | FGA Isoform 1 of Fibrinogen alpha chain precursor | VQHIQLL                  | 2 | 495.8084  | 1.504 | 0.11  |
| 42 | IPI00021885 | 1 | 42.1 | 0.91 | 0.17 | 521 | ## | FGA Isoform 1 of Fibrinogen alpha chain precursor | TFPGFFSPM[147]           | 2 | 593.7837  | 1.534 | 0.136 |
| 42 | IPI00021885 | 1 | 42.1 | 0.91 | 0.17 | 521 | ## | FGA Isoform 1 of Fibrinogen alpha chain precursor | n[145]VIGPDGHK[272]      | 2 | 555.8292  | 1.859 | 0.07  |
| 42 | IPI00021885 | 1 | 42.1 | 0.91 | 0.17 | 521 | ## | FGA Isoform 1 of Fibrinogen alpha chain precursor | n[145]GSAGHWTSESSVSG     | 2 | 746.8429  | 2.084 | 0.054 |

|    |             |   |      |      |      |     |    |                                                         |                                              |   |           |       |       |
|----|-------------|---|------|------|------|-----|----|---------------------------------------------------------|----------------------------------------------|---|-----------|-------|-------|
| 42 | IPI00021885 | 1 | 42.1 | 0.91 | 0.17 | 521 | ## | FGA Isoform 1 of Fibrinogen alpha chain precursor       | n[145]TFPGFFSPM                              | 2 | 587.7898  | 1.813 | 0.004 |
| 42 | IPI00021885 | 1 | 42.1 | 0.91 | 0.17 | 521 | ## | FGA Isoform 1 of Fibrinogen alpha chain precursor       | n[145]TVIGPDG                                | 1 | 802.4428  | 1.825 | 0.067 |
| 42 | IPI00021885 | 1 | 42.1 | 0.91 | 0.17 | 521 | ## | FGA Isoform 1 of Fibrinogen alpha chain precursor       | n[145]LK[272]DYEDQQK[272]                    | 3 | 533.6299  | 2.223 | 0.088 |
| 43 | IPI00021891 | 1 | 63.4 | N_A  | N_A  | N_A | 99 | FGG Isoform Gamma-B of Fibrinogen gamma chain precursor | n[145]DNCCILDER                              | 1 | 1316.5224 | 2.197 | 0.387 |
| 43 | IPI00021891 | 1 | 63.4 | N_A  | N_A  | N_A | 99 | FGG Isoform Gamma-B of Fibrinogen gamma chain precursor | AIQLTYNPDESSKPNMIDAATLK                      | 2 | 1470.7787 | 5.094 | 0.532 |
| 43 | IPI00021891 | 1 | 63.4 | N_A  | N_A  | N_A | 99 | FGG Isoform Gamma-B of Fibrinogen gamma chain precursor | DTVQIHDTGK                                   | 2 | 753.9174  | 2.746 | 0.228 |
| 43 | IPI00021891 | 1 | 63.4 | N_A  | N_A  | N_A | 99 | FGG Isoform Gamma-B of Fibrinogen gamma chain precursor | EGFGHLSPTGTTEFWLGNEK                         | 2 | 1244.1188 | 6.265 | 0.484 |
| 43 | IPI00021891 | 1 | 63.4 | N_A  | N_A  | N_A | 99 | FGG Isoform Gamma-B of Fibrinogen gamma chain precursor | EGFGHLSPTGTTEFWLGNEK[272]                    | 2 | 1246.1224 | 4.795 | 0.417 |
| 43 | IPI00021891 | 1 | 63.4 | N_A  | N_A  | N_A | 99 | FGG Isoform Gamma-B of Fibrinogen gamma chain precursor | GIADFLSTYQTK                                 | 2 | 812.4407  | 3.051 | 0.398 |
| 43 | IPI00021891 | 1 | 63.4 | N_A  | N_A  | N_A | 99 | FGG Isoform Gamma-B of Fibrinogen gamma chain precursor | LTIGEGQQHHLGGAK                              | 2 | 913.5052  | 6.014 | 0.506 |
| 43 | IPI00021891 | 1 | 63.4 | N_A  | N_A  | N_A | 99 | FGG Isoform Gamma-B of Fibrinogen gamma chain precursor | QSGLYFIKPLK                                  | 2 | 857.5244  | 1.858 | 0.052 |
| 43 | IPI00021891 | 1 | 63.4 | N_A  | N_A  | N_A | 99 | FGG Isoform Gamma-B of Fibrinogen gamma chain precursor | TSTADYAMFK                                   | 2 | 707.8554  | 4.457 | 0.417 |
| 43 | IPI00021891 | 1 | 63.4 | N_A  | N_A  | N_A | 99 | FGG Isoform Gamma-B of Fibrinogen gamma chain precursor | TSTADYAM[147]FK                              | 2 | 715.8529  | 3.863 | 0.469 |
| 43 | IPI00021891 | 1 | 63.4 | N_A  | N_A  | N_A | 99 | FGG Isoform Gamma-B of Fibrinogen gamma chain precursor | YLQEIYNSNNQK                                 | 2 | 897.4627  | 4.713 | 0.457 |
| 43 | IPI00021891 | 1 | 63.4 | N_A  | N_A  | N_A | 99 | FGG Isoform Gamma-B of Fibrinogen gamma chain precursor | n[145]AIQLTYNPDESSK[272]PN                   | 2 | 983.012   | 4.094 | 0.355 |
| 43 | IPI00021891 | 1 | 63.4 | N_A  | N_A  | N_A | 99 | FGG Isoform Gamma-B of Fibrinogen gamma chain precursor | n[145]AIQLTYNPDESSK[272]PNMIDAATLK[272]      | 2 | 1476.7893 | 4.506 | 0.499 |
| 43 | IPI00021891 | 1 | 63.4 | N_A  | N_A  | N_A | 99 | FGG Isoform Gamma-B of Fibrinogen gamma chain precursor | n[145]DTVQIHDTGK[272]                        | 2 | 757.9245  | 2.184 | 0.264 |
| 43 | IPI00021891 | 1 | 63.4 | N_A  | N_A  | N_A | 99 | FGG Isoform Gamma-B of Fibrinogen gamma chain precursor | n[145]EGFGHLSPTGTTEF                         | 2 | 812.3922  | 4.052 | 0.387 |
| 43 | IPI00021891 | 1 | 63.4 | N_A  | N_A  | N_A | 99 | FGG Isoform Gamma-B of Fibrinogen gamma chain precursor | n[145]EGFGHLSPTGTTEFWLGNEK[272]              | 2 | 1248.1259 | 5.966 | 0.53  |
| 43 | IPI00021891 | 1 | 63.4 | N_A  | N_A  | N_A | 99 | FGG Isoform Gamma-B of Fibrinogen gamma chain precursor | n[145]GIADFLSTYQTK[272]                      | 2 | 816.4478  | 4.5   | 0.481 |
| 43 | IPI00021891 | 1 | 63.4 | N_A  | N_A  | N_A | 99 | FGG Isoform Gamma-B of Fibrinogen gamma chain precursor | n[145]LTIGEGQQHHLGGAK[272]                   | 2 | 917.5123  | 5.644 | 0.542 |
| 43 | IPI00021891 | 1 | 63.4 | N_A  | N_A  | N_A | 99 | FGG Isoform Gamma-B of Fibrinogen gamma chain precursor | n[145]QSGLYFIK[272]PLK[272]                  | 2 | 863.5351  | 4.383 | 0.491 |
| 43 | IPI00021891 | 1 | 63.4 | N_A  | N_A  | N_A | 99 | FGG Isoform Gamma-B of Fibrinogen gamma chain precursor | n[145]TCGIADFLSTYQTK[272]                    | 2 | 941.4701  | 4.266 | 0.52  |
| 43 | IPI00021891 | 1 | 63.4 | N_A  | N_A  | N_A | 99 | FGG Isoform Gamma-B of Fibrinogen gamma chain precursor | n[145]TSTADYAMFK[272]                        | 2 | 711.8625  | 4.331 | 0.491 |
| 43 | IPI00021891 | 1 | 63.4 | N_A  | N_A  | N_A | 99 | FGG Isoform Gamma-B of Fibrinogen gamma chain precursor | n[145]TSTADYAM[147]FK[272]                   | 2 | 719.86    | 3.398 | 0.494 |
| 43 | IPI00021891 | 1 | 63.4 | N_A  | N_A  | N_A | 99 | FGG Isoform Gamma-B of Fibrinogen gamma chain precursor | n[145]TVQIHDTGK[272]                         | 2 | 700.411   | 4.305 | 0.445 |
| 43 | IPI00021891 | 1 | 63.4 | N_A  | N_A  | N_A | 99 | FGG Isoform Gamma-B of Fibrinogen gamma chain precursor | n[145]VAQLEAQCQEPCK[272]                     | 2 | 913.9292  | 3.131 | 0.474 |
| 43 | IPI00021891 | 1 | 63.4 | N_A  | N_A  | N_A | 99 | FGG Isoform Gamma-B of Fibrinogen gamma chain precursor | n[145]YEASILTHDSSIR                          | 2 | 818.4266  | 2.532 | 0.345 |
| 43 | IPI00021891 | 1 | 63.4 | N_A  | N_A  | N_A | 99 | FGG Isoform Gamma-B of Fibrinogen gamma chain precursor | n[145]YLQEIYNSNNQK[272]                      | 2 | 901.4698  | 4.827 | 0.399 |
| 43 | IPI00021891 | 1 | 63.4 | N_A  | N_A  | N_A | 99 | FGG Isoform Gamma-B of Fibrinogen gamma chain precursor | AIQLTYNPDESSKPNMIDAATLK                      | 3 | 980.8549  | 5.053 | 0.466 |
| 43 | IPI00021891 | 1 | 63.4 | N_A  | N_A  | N_A | 99 | FGG Isoform Gamma-B of Fibrinogen gamma chain precursor | AIQLTYNPDESSKPNM[147]IDAATLK                 | 3 | 986.1865  | 4.989 | 0.469 |
| 43 | IPI00021891 | 1 | 63.4 | N_A  | N_A  | N_A | 99 | FGG Isoform Gamma-B of Fibrinogen gamma chain precursor | CHAGHLNGVYYQGGTYSK                           | 3 | 761.0262  | 6.364 | 0.582 |
| 43 | IPI00021891 | 1 | 63.4 | N_A  | N_A  | N_A | 99 | FGG Isoform Gamma-B of Fibrinogen gamma chain precursor | DTVQIHDTGK                                   | 3 | 502.9474  | 3.135 | 0.345 |
| 43 | IPI00021891 | 1 | 63.4 | N_A  | N_A  | N_A | 99 | FGG Isoform Gamma-B of Fibrinogen gamma chain precursor | EGFGHLSPTGTTEFWLGNEK                         | 3 | 829.7483  | 4.738 | 0.529 |
| 43 | IPI00021891 | 1 | 63.4 | N_A  | N_A  | N_A | 99 | FGG Isoform Gamma-B of Fibrinogen gamma chain precursor | FAGGDAGDAFDGDFGDDPSDK                        | 3 | 835.0277  | 4.955 | 0.548 |
| 43 | IPI00021891 | 1 | 63.4 | N_A  | N_A  | N_A | 99 | FGG Isoform Gamma-B of Fibrinogen gamma chain precursor | KMLEEIMKYEASILTHDSSIR                        | 3 | 972.1892  | 4.613 | 0.483 |
| 43 | IPI00021891 | 1 | 63.4 | N_A  | N_A  | N_A | 99 | FGG Isoform Gamma-B of Fibrinogen gamma chain precursor | LTIGEGQQHHLGGAK                              | 3 | 609.3392  | 2.59  | 0.105 |
| 43 | IPI00021891 | 1 | 63.4 | N_A  | N_A  | N_A | 99 | FGG Isoform Gamma-B of Fibrinogen gamma chain precursor | VAQLEAQCQEPCKDTVQIHDTGK                      | 3 | 1056.1887 | 5.282 | 0.512 |
| 43 | IPI00021891 | 1 | 63.4 | N_A  | N_A  | N_A | 99 | FGG Isoform Gamma-B of Fibrinogen gamma chain precursor | YLQEIYNSNNQK                                 | 3 | 598.6442  | 4.373 | 0.402 |
| 43 | IPI00021891 | 1 | 63.4 | N_A  | N_A  | N_A | 99 | FGG Isoform Gamma-B of Fibrinogen gamma chain precursor | n[145]AIQLTYNPDESSK[272]PNMIDAATLK[272]      | 3 | 984.862   | 3.571 | 0.279 |
| 43 | IPI00021891 | 1 | 63.4 | N_A  | N_A  | N_A | 99 | FGG Isoform Gamma-B of Fibrinogen gamma chain precursor | n[145]AIQLTYNPDESSK[272]PNM[147]IDAATLK[272] | 3 | 990.1936  | 4.764 | 0.525 |
| 43 | IPI00021891 | 1 | 63.4 | N_A  | N_A  | N_A | 99 | FGG Isoform Gamma-B of Fibrinogen gamma chain precursor | n[145]CHAGHLNGVYYQGGTYSK[272]                | 3 | 763.6976  | 6.804 | 0.526 |
| 43 | IPI00021891 | 1 | 63.4 | N_A  | N_A  | N_A | 99 | FGG Isoform Gamma-B of Fibrinogen gamma chain precursor | n[145]DTVQIHDTGK[272]                        | 3 | 505.6188  | 2.543 | 0.318 |
| 43 | IPI00021891 | 1 | 63.4 | N_A  | N_A  | N_A | 99 | FGG Isoform Gamma-B of Fibrinogen gamma chain precursor | n[145]FAGGDAGDAFDGDFGDDPSDK[272]             | 3 | 837.6991  | 5.273 | 0.599 |
| 43 | IPI00021891 | 1 | 63.4 | N_A  | N_A  | N_A | 99 | FGG Isoform Gamma-B of Fibrinogen gamma chain precursor | n[145]JHLISTQSAIPYALR                        | 3 | 609.6918  | 3.428 | 0.234 |
| 43 | IPI00021891 | 1 | 63.4 | N_A  | N_A  | N_A | 99 | FGG Isoform Gamma-B of Fibrinogen gamma chain precursor | n[145]LTIGEGQQHHLG                           | 3 | 478.5921  | 4.393 | 0.484 |
| 43 | IPI00021891 | 1 | 63.4 | N_A  | N_A  | N_A | 99 | FGG Isoform Gamma-B of Fibrinogen gamma chain precursor | n[145]LTIGEGQQHHLGGAK[272]                   | 3 | 612.0106  | 3.661 | 0.316 |
| 43 | IPI00021891 | 1 | 63.4 | N_A  | N_A  | N_A | 99 | FGG Isoform Gamma-B of Fibrinogen gamma chain precursor | n[145]QSGLYFIK[272]PLK[272]                  | 3 | 576.0258  | 3.663 | 0.352 |



|    |             |   |      |     |     |     |    |                                                         |                                              |   |           |       |       |
|----|-------------|---|------|-----|-----|-----|----|---------------------------------------------------------|----------------------------------------------|---|-----------|-------|-------|
| 43 | IPI00021891 | 1 | 63.4 | N_A | N_A | N_A | 99 | FGG Isoform Gamma-B of Fibrinogen gamma chain precursor | n[145]VAQLEAQCQEPCK[272]DTVQIHDITGK[272]     | 3 | 1060.1958 | 6.647 | 0.576 |
| 43 | IPI00021891 | 1 | 63.4 | N_A | N_A | N_A | 99 | FGG Isoform Gamma-B of Fibrinogen gamma chain precursor | n[145]YEASILTHDSSIR                          | 3 | 545.9535  | 1.619 | 0.018 |
| 43 | IPI00021891 | 1 | 63.4 | N_A | N_A | N_A | 99 | FGG Isoform Gamma-B of Fibrinogen gamma chain precursor | KMLEEIMKYEASILTHDSSIR                        | 4 | 729.3937  | 5.105 | 0.517 |
| 43 | IPI00021891 | 1 | 63.4 | N_A | N_A | N_A | 99 | FGG Isoform Gamma-B of Fibrinogen gamma chain precursor | LTIGEGQQHHLGGAK                              | 4 | 457.2563  | 3.972 | 0.446 |
| 43 | IPI00021891 | 1 | 63.4 | N_A | N_A | N_A | 99 | FGG Isoform Gamma-B of Fibrinogen gamma chain precursor | QSGLYFIKPLK                                  | 4 | 429.2659  | 1.97  | 0.306 |
| 43 | IPI00021891 | 1 | 63.4 | N_A | N_A | N_A | 99 | FGG Isoform Gamma-B of Fibrinogen gamma chain precursor | VAQLEAQCQEPCKDTVQIHDITGK                     | 4 | 792.3934  | 4.279 | 0.383 |
| 43 | IPI00021891 | 1 | 63.4 | N_A | N_A | N_A | 99 | FGG Isoform Gamma-B of Fibrinogen gamma chain precursor | n[145]LTIGEGQQHHLGGAK[272]                   | 4 | 459.2598  | 2.972 | 0.326 |
| 43 | IPI00021891 | 1 | 63.4 | N_A | N_A | N_A | 99 | FGG Isoform Gamma-B of Fibrinogen gamma chain precursor | n[145]QSGLYFIK[272]PLK[272]                  | 4 | 432.2712  | 2.567 | 0.337 |
| 43 | IPI00021891 | 1 | 63.4 | N_A | N_A | N_A | 99 | FGG Isoform Gamma-B of Fibrinogen gamma chain precursor | n[145]VAQLEAQCQEPCK[272]DTVQIHDITGK[272]     | 4 | 795.3987  | 5.295 | 0.4   |
| 43 | IPI00021891 | 1 | 63.4 | N_A | N_A | N_A | 99 | FGG Isoform Gamma-B of Fibrinogen gamma chain precursor | KMLEEIMKYEASILTHDSSIR                        | 5 | 583.7164  | 4.728 | 0.502 |
| 43 | IPI00021891 | 1 | 63.4 | N_A | N_A | N_A | 99 | FGG Isoform Gamma-B of Fibrinogen gamma chain precursor | QSGLYFIKPLK                                  | 3 | 572.0187  | 2.77  | 0.129 |
| 43 | IPI00021891 | 1 | 63.4 | N_A | N_A | N_A | 99 | FGG Isoform Gamma-B of Fibrinogen gamma chain precursor | RLDGSVDFK                                    | 3 | 439.5822  | 4.1   | 0.236 |
| 43 | IPI00021891 | 1 | 63.4 | N_A | N_A | N_A | 99 | FGG Isoform Gamma-B of Fibrinogen gamma chain precursor | VGPEADKYR                                    | 3 | 438.9104  | 3.208 | 0.4   |
| 43 | IPI00021891 | 1 | 63.4 | N_A | N_A | N_A | 99 | FGG Isoform Gamma-B of Fibrinogen gamma chain precursor | n[145]YDKYEIYNSNNQK[272]                     | 3 | 601.3156  | 3.845 | 0.254 |
| 43 | IPI00021891 | 1 | 63.4 | N_A | N_A | N_A | 99 | FGG Isoform Gamma-B of Fibrinogen gamma chain precursor | n[145]AIQLTYNPDESSK[272]PNM[147]IDAATLK[272] | 4 | 742.897   | 3.57  | 0.303 |
| 43 | IPI00021891 | 1 | 63.4 | N_A | N_A | N_A | 99 | FGG Isoform Gamma-B of Fibrinogen gamma chain precursor | n[145]RLDGSVDFK[272]K[272]                   | 4 | 399.9913  | 1.638 | 0.129 |
| 43 | IPI00021891 | 1 | 63.4 | N_A | N_A | N_A | 99 | FGG Isoform Gamma-B of Fibrinogen gamma chain precursor | LDGSVDFKK                                    | 2 | 714.9142  | 2.941 | 0.408 |
| 43 | IPI00021891 | 1 | 63.4 | N_A | N_A | N_A | 99 | FGG Isoform Gamma-B of Fibrinogen gamma chain precursor | YEASILTHDSSIR                                | 2 | 816.423   | 3.879 | 0.4   |
| 43 | IPI00021891 | 1 | 63.4 | N_A | N_A | N_A | 99 | FGG Isoform Gamma-B of Fibrinogen gamma chain precursor | n[145]IHLISTQSAIPYALR                        | 2 | 914.0341  | 1.996 | 0.145 |
| 43 | IPI00021891 | 1 | 63.4 | N_A | N_A | N_A | 99 | FGG Isoform Gamma-B of Fibrinogen gamma chain precursor | KM[147]LEEIMK                                | 3 | 486.6122  | 1.855 | 0.026 |
| 43 | IPI00021891 | 1 | 63.4 | N_A | N_A | N_A | 99 | FGG Isoform Gamma-B of Fibrinogen gamma chain precursor | n[145]RLDGSVDFK[272]                         | 3 | 442.2536  | 2.947 | 0.247 |
| 43 | IPI00021891 | 1 | 63.4 | N_A | N_A | N_A | 99 | FGG Isoform Gamma-B of Fibrinogen gamma chain precursor | DCQDIANK                                     | 2 | 616.7918  | 2.496 | 0.194 |
| 43 | IPI00021891 | 1 | 63.4 | N_A | N_A | N_A | 99 | FGG Isoform Gamma-B of Fibrinogen gamma chain precursor | VAQLEAQCQEPCK                                | 2 | 909.9221  | 2.805 | 0.445 |
| 43 | IPI00021891 | 1 | 63.4 | N_A | N_A | N_A | 99 | FGG Isoform Gamma-B of Fibrinogen gamma chain precursor | n[145]DCQDIANK[272]                          | 2 | 620.7989  | 2.82  | 0.28  |
| 43 | IPI00021891 | 1 | 63.4 | N_A | N_A | N_A | 99 | FGG Isoform Gamma-B of Fibrinogen gamma chain precursor | n[145]DNCCILDER                              | 2 | 658.7648  | 2.981 | 0.348 |
| 43 | IPI00021891 | 1 | 63.4 | N_A | N_A | N_A | 99 | FGG Isoform Gamma-B of Fibrinogen gamma chain precursor | n[145]RLDGSVDFK[272]K[272]                   | 2 | 798.9754  | 3.28  | 0.353 |
| 43 | IPI00021891 | 1 | 63.4 | N_A | N_A | N_A | 99 | FGG Isoform Gamma-B of Fibrinogen gamma chain precursor | EGFGHLSPTGTTEFWLGNEK[272]                    | 3 | 831.084   | 4.4   | 0.389 |
| 43 | IPI00021891 | 1 | 63.4 | N_A | N_A | N_A | 99 | FGG Isoform Gamma-B of Fibrinogen gamma chain precursor | AIQLTYNPDESSKPNMIDAATLK                      | 4 | 735.893   | 3.439 | 0.235 |
| 43 | IPI00021891 | 1 | 63.4 | N_A | N_A | N_A | 99 | FGG Isoform Gamma-B of Fibrinogen gamma chain precursor | KM[147]LEEIM[147]KYEASILTHDSSIR              | 4 | 737.3912  | 3.365 | 0.256 |
| 43 | IPI00021891 | 1 | 63.4 | N_A | N_A | N_A | 99 | FGG Isoform Gamma-B of Fibrinogen gamma chain precursor | n[145]DCQDIANK[272]                          | 1 | 1240.5905 | 2.453 | 0.308 |
| 43 | IPI00021891 | 1 | 63.4 | N_A | N_A | N_A | 99 | FGG Isoform Gamma-B of Fibrinogen gamma chain precursor | IHLISTQSAIPYALR                              | 3 | 608.3561  | 2.856 | 0.191 |
| 43 | IPI00021891 | 1 | 63.4 | N_A | N_A | N_A | 99 | FGG Isoform Gamma-B of Fibrinogen gamma chain precursor | DCQDIANK                                     | 1 | 1232.5763 | 2.406 | 0.352 |
| 43 | IPI00021891 | 1 | 63.4 | N_A | N_A | N_A | 99 | FGG Isoform Gamma-B of Fibrinogen gamma chain precursor | n[145]LDGSVDFK[272]                          | 1 | 1168.6453 | 2.342 | 0.262 |
| 43 | IPI00021891 | 1 | 63.4 | N_A | N_A | N_A | 99 | FGG Isoform Gamma-B of Fibrinogen gamma chain precursor | RLDGSVDFKK                                   | 2 | 792.9647  | 3.362 | 0.24  |
| 43 | IPI00021891 | 1 | 63.4 | N_A | N_A | N_A | 99 | FGG Isoform Gamma-B of Fibrinogen gamma chain precursor | VELEDWNGR                                    | 2 | 629.3148  | 2.308 | 0.088 |
| 43 | IPI00021891 | 1 | 63.4 | N_A | N_A | N_A | 99 | FGG Isoform Gamma-B of Fibrinogen gamma chain precursor | YEASILTHDSSIR                                | 3 | 544.6178  | 2.921 | 0.077 |
| 43 | IPI00021891 | 1 | 63.4 | N_A | N_A | N_A | 99 | FGG Isoform Gamma-B of Fibrinogen gamma chain precursor | n[145]EGFGHLSPTGTTEFWLGNEK[272]              | 3 | 832.4197  | 3.443 | 0.259 |
| 43 | IPI00021891 | 1 | 63.4 | N_A | N_A | N_A | 99 | FGG Isoform Gamma-B of Fibrinogen gamma chain precursor | n[145]VGPEADK[272]YR                         | 3 | 441.5818  | 2.251 | 0.103 |
| 43 | IPI00021891 | 1 | 63.4 | N_A | N_A | N_A | 99 | FGG Isoform Gamma-B of Fibrinogen gamma chain precursor | VELEDWNGR                                    | 1 | 1257.6223 | 2.928 | 0.147 |
| 43 | IPI00021891 | 1 | 63.4 | N_A | N_A | N_A | 99 | FGG Isoform Gamma-B of Fibrinogen gamma chain precursor | n[145]VELEDWNGR                              | 1 | 1261.6294 | 2.673 | 0.18  |
| 43 | IPI00021891 | 1 | 63.4 | N_A | N_A | N_A | 99 | FGG Isoform Gamma-B of Fibrinogen gamma chain precursor | n[145]VELEDWNGR                              | 2 | 631.3183  | 3.031 | 0.313 |
| 43 | IPI00021891 | 1 | 63.4 | N_A | N_A | N_A | 99 | FGG Isoform Gamma-B of Fibrinogen gamma chain precursor | LDGSVDFK                                     | 1 | 1160.6311 | 2.327 | 0.233 |
| 43 | IPI00021891 | 1 | 63.4 | N_A | N_A | N_A | 99 | FGG Isoform Gamma-B of Fibrinogen gamma chain precursor | LTIGEGQQHHLG                                 | 3 | 477.2564  | 3.871 | 0.321 |
| 43 | IPI00021891 | 1 | 63.4 | N_A | N_A | N_A | 99 | FGG Isoform Gamma-B of Fibrinogen gamma chain precursor | n[145]LTIGEGQQHHLGGA                         | 3 | 521.2783  | 3.566 | 0.346 |
| 43 | IPI00021891 | 1 | 63.4 | N_A | N_A | N_A | 99 | FGG Isoform Gamma-B of Fibrinogen gamma chain precursor | n[145]LDGSVDFK[272]                          | 2 | 584.8263  | 2.144 | 0.151 |
| 43 | IPI00021891 | 1 | 63.4 | N_A | N_A | N_A | 99 | FGG Isoform Gamma-B of Fibrinogen gamma chain precursor | n[145]VGPEADK[272]                           | 2 | 502.2868  | 2.179 | 0.28  |
| 43 | IPI00021891 | 1 | 63.4 | N_A | N_A | N_A | 99 | FGG Isoform Gamma-B of Fibrinogen gamma chain precursor | n[145]TVQIHDITGK[272]                        | 3 | 467.2764  | 2.782 | 0.376 |
| 43 | IPI00021891 | 1 | 63.4 | N_A | N_A | N_A | 99 | FGG Isoform Gamma-B of Fibrinogen gamma chain precursor | LDGSVDFK                                     | 2 | 580.8192  | 1.873 | 0.032 |

|    |             |   |      |     |     |     |    |                                                         |                                              |   |           |       |       |
|----|-------------|---|------|-----|-----|-----|----|---------------------------------------------------------|----------------------------------------------|---|-----------|-------|-------|
| 43 | IPI00021891 | 1 | 63.4 | N_A | N_A | N_A | 99 | FGG Isoform Gamma-B of Fibrinogen gamma chain precursor | n[145]LTIGEGQQHHL                            | 3 | 459.5849  | 3.542 | 0.315 |
| 43 | IPI00021891 | 1 | 63.4 | N_A | N_A | N_A | 99 | FGG Isoform Gamma-B of Fibrinogen gamma chain precursor | n[145]MLEEIMK[272]                           | 2 | 591.3293  | 2.962 | 0.134 |
| 43 | IPI00021891 | 1 | 63.4 | N_A | N_A | N_A | 99 | FGG Isoform Gamma-B of Fibrinogen gamma chain precursor | RLDGSVDFK                                    | 2 | 658.8697  | 2.103 | 0.095 |
| 43 | IPI00021891 | 1 | 63.4 | N_A | N_A | N_A | 99 | FGG Isoform Gamma-B of Fibrinogen gamma chain precursor | VGPEADKYR                                    | 2 | 657.8619  | 2.808 | 0.375 |
| 43 | IPI00021891 | 1 | 63.4 | N_A | N_A | N_A | 99 | FGG Isoform Gamma-B of Fibrinogen gamma chain precursor | n[145]VGPEADK[272]YR                         | 1 | 1322.7308 | 2.449 | 0.2   |
| 43 | IPI00021891 | 1 | 63.4 | N_A | N_A | N_A | 99 | FGG Isoform Gamma-B of Fibrinogen gamma chain precursor | KMLEEIMK                                     | 2 | 721.4172  | 2.78  | 0.129 |
| 43 | IPI00021891 | 1 | 63.4 | N_A | N_A | N_A | 99 | FGG Isoform Gamma-B of Fibrinogen gamma chain precursor | n[145]RLDGSVDFK[272]                         | 2 | 662.8768  | 2.291 | 0.16  |
| 43 | IPI00021891 | 1 | 63.4 | N_A | N_A | N_A | 99 | FGG Isoform Gamma-B of Fibrinogen gamma chain precursor | n[145]VGPEADK[272]YR                         | 2 | 661.869   | 2.769 | 0.276 |
| 43 | IPI00021891 | 1 | 63.4 | N_A | N_A | N_A | 99 | FGG Isoform Gamma-B of Fibrinogen gamma chain precursor | n[145]RLDGSVDFK[272]K[272]                   | 3 | 532.986   | 1.735 | 0.026 |
| 43 | IPI00021891 | 1 | 63.4 | N_A | N_A | N_A | 99 | FGG Isoform Gamma-B of Fibrinogen gamma chain precursor | KM[147]LEEIM[147]K                           | 2 | 737.4121  | 2.285 | 0.204 |
| 43 | IPI00021891 | 1 | 63.4 | N_A | N_A | N_A | 99 | FGG Isoform Gamma-B of Fibrinogen gamma chain precursor | VGPEADK                                      | 2 | 498.2797  | 2.189 | 0.169 |
| 43 | IPI00021891 | 1 | 63.4 | N_A | N_A | N_A | 99 | FGG Isoform Gamma-B of Fibrinogen gamma chain precursor | n[145]SSK[272]PNM[147]IDAATLK[272]           | 3 | 608.6802  | 2.767 | 0.347 |
| 43 | IPI00021891 | 1 | 63.4 | N_A | N_A | N_A | 99 | FGG Isoform Gamma-B of Fibrinogen gamma chain precursor | n[145]AIQLTYNPDESSK[272]PNM[147]IDAATLK[272] | 2 | 1484.7868 | 3.126 | 0.486 |
| 43 | IPI00021891 | 1 | 63.4 | N_A | N_A | N_A | 99 | FGG Isoform Gamma-B of Fibrinogen gamma chain precursor | RLDGSVDFKK                                   | 4 | 396.986   | 2.457 | 0.278 |
| 43 | IPI00021891 | 1 | 63.4 | N_A | N_A | N_A | 99 | FGG Isoform Gamma-B of Fibrinogen gamma chain precursor | MLEEIMK                                      | 2 | 587.3222  | 2.417 | 0.101 |
| 43 | IPI00021891 | 1 | 63.4 | N_A | N_A | N_A | 99 | FGG Isoform Gamma-B of Fibrinogen gamma chain precursor | M[147]LEEIM[147]K                            | 2 | 603.3171  | 2.223 | 0.107 |
| 43 | IPI00021891 | 1 | 63.4 | N_A | N_A | N_A | 99 | FGG Isoform Gamma-B of Fibrinogen gamma chain precursor | n[145]LTIGEGQQHH                             | 3 | 421.8903  | 2.967 | 0.282 |
| 43 | IPI00021891 | 1 | 63.4 | N_A | N_A | N_A | 99 | FGG Isoform Gamma-B of Fibrinogen gamma chain precursor | n[145]TIGEGQQHHLGGAK[272]                    | 3 | 574.316   | 3.612 | 0.27  |
| 43 | IPI00021891 | 1 | 63.4 | N_A | N_A | N_A | 99 | FGG Isoform Gamma-B of Fibrinogen gamma chain precursor | LDGSVDFKK                                    | 3 | 476.9452  | 1.837 | 0.188 |
| 43 | IPI00021891 | 1 | 63.4 | N_A | N_A | N_A | 99 | FGG Isoform Gamma-B of Fibrinogen gamma chain precursor | n[145]MLEEIM[147]K[272]                      | 1 | 1197.6462 | 1.765 | 0.072 |
| 43 | IPI00021891 | 1 | 63.4 | N_A | N_A | N_A | 99 | FGG Isoform Gamma-B of Fibrinogen gamma chain precursor | IVNLKEK                                      | 2 | 632.4111  | 2.819 | 0.118 |
| 43 | IPI00021891 | 1 | 63.4 | N_A | N_A | N_A | 99 | FGG Isoform Gamma-B of Fibrinogen gamma chain precursor | MLEEIM[147]K                                 | 1 | 1189.632  | 1.934 | 0.082 |
| 43 | IPI00021891 | 1 | 63.4 | N_A | N_A | N_A | 99 | FGG Isoform Gamma-B of Fibrinogen gamma chain precursor | n[145]MLEEIM[147]K[272]YEASILTHDSSIR         | 4 | 668.3485  | 2.549 | 0.25  |
| 43 | IPI00021891 | 1 | 63.4 | N_A | N_A | N_A | 99 | FGG Isoform Gamma-B of Fibrinogen gamma chain precursor | n[145]LDGSVDFK[272]K[272]                    | 2 | 720.9248  | 2.054 | 0.087 |
| 43 | IPI00021891 | 1 | 63.4 | N_A | N_A | N_A | 99 | FGG Isoform Gamma-B of Fibrinogen gamma chain precursor | n[145]LDGSVDFK[272]K[272]                    | 3 | 480.9523  | 1.955 | 0.135 |
| 43 | IPI00021891 | 1 | 63.4 | N_A | N_A | N_A | 99 | FGG Isoform Gamma-B of Fibrinogen gamma chain precursor | MLEEIM[147]K                                 | 2 | 595.3196  | 2.315 | 0.031 |
| 43 | IPI00021891 | 1 | 63.4 | N_A | N_A | N_A | 99 | FGG Isoform Gamma-B of Fibrinogen gamma chain precursor | n[145]TSTADYAM[147]FK[272]                   | 3 | 480.2424  | 1.865 | 0.191 |
| 43 | IPI00021891 | 1 | 63.4 | N_A | N_A | N_A | 99 | FGG Isoform Gamma-B of Fibrinogen gamma chain precursor | LTIGEGQQHHLGG                                | 3 | 496.2636  | 3.146 | 0.254 |
| 43 | IPI00021891 | 1 | 63.4 | N_A | N_A | N_A | 99 | FGG Isoform Gamma-B of Fibrinogen gamma chain precursor | n[145]LISTQSAIPYALR                          | 2 | 788.9626  | 4.069 | 0.373 |
| 43 | IPI00021891 | 1 | 63.4 | N_A | N_A | N_A | 99 | FGG Isoform Gamma-B of Fibrinogen gamma chain precursor | TVQIHDTGK                                    | 2 | 696.4039  | 3.838 | 0.335 |
| 43 | IPI00021891 | 1 | 63.4 | N_A | N_A | N_A | 99 | FGG Isoform Gamma-B of Fibrinogen gamma chain precursor | TSTADYAM[147]FK                              | 3 | 477.571   | 2.856 | 0.018 |
| 43 | IPI00021891 | 1 | 63.4 | N_A | N_A | N_A | 99 | FGG Isoform Gamma-B of Fibrinogen gamma chain precursor | n[145]GIADFLSTYQTK[272]                      | 3 | 544.6343  | 2.582 | 0.283 |
| 43 | IPI00021891 | 1 | 63.4 | N_A | N_A | N_A | 99 | FGG Isoform Gamma-B of Fibrinogen gamma chain precursor | LYFIKPLK                                     | 2 | 721.4684  | 3.112 | 0.352 |
| 43 | IPI00021891 | 1 | 63.4 | N_A | N_A | N_A | 99 | FGG Isoform Gamma-B of Fibrinogen gamma chain precursor | n[145]LTIGEGQQHHLGG                          | 2 | 745.8953  | 3.614 | 0.358 |
| 43 | IPI00021891 | 1 | 63.4 | N_A | N_A | N_A | 99 | FGG Isoform Gamma-B of Fibrinogen gamma chain precursor | LTIGEGQQHHLG                                 | 2 | 715.381   | 3.461 | 0.335 |
| 43 | IPI00021891 | 1 | 63.4 | N_A | N_A | N_A | 99 | FGG Isoform Gamma-B of Fibrinogen gamma chain precursor | n[145]IVNLK[272]EK[272]                      | 2 | 638.4217  | 2.263 | 0.11  |
| 43 | IPI00021891 | 1 | 63.4 | N_A | N_A | N_A | 99 | FGG Isoform Gamma-B of Fibrinogen gamma chain precursor | n[145]LTIGEGQQHHLG                           | 2 | 717.3845  | 3.463 | 0.384 |
| 43 | IPI00021891 | 1 | 63.4 | N_A | N_A | N_A | 99 | FGG Isoform Gamma-B of Fibrinogen gamma chain precursor | GLYFIKPLK                                    | 2 | 749.9791  | 2.89  | 0.437 |
| 43 | IPI00021891 | 1 | 63.4 | N_A | N_A | N_A | 99 | FGG Isoform Gamma-B of Fibrinogen gamma chain precursor | n[145]QSGLYFIK[272]                          | 2 | 622.3681  | 2.709 | 0.342 |
| 43 | IPI00021891 | 1 | 63.4 | N_A | N_A | N_A | 99 | FGG Isoform Gamma-B of Fibrinogen gamma chain precursor | n[145]SGLYFIK[272]PLK[272]                   | 3 | 533.3396  | 3.119 | 0.258 |
| 43 | IPI00021891 | 1 | 63.4 | N_A | N_A | N_A | 99 | FGG Isoform Gamma-B of Fibrinogen gamma chain precursor | AIQLTYNPDESSKPN                              | 2 | 979.0049  | 4.288 | 0.405 |
| 43 | IPI00021891 | 1 | 63.4 | N_A | N_A | N_A | 99 | FGG Isoform Gamma-B of Fibrinogen gamma chain precursor | FFTSHNGM[147]QF                              | 2 | 686.3112  | 2.747 | 0.326 |
| 43 | IPI00021891 | 1 | 63.4 | N_A | N_A | N_A | 99 | FGG Isoform Gamma-B of Fibrinogen gamma chain precursor | SGLYFIKPLK                                   | 2 | 793.4951  | 3.781 | 0.265 |
| 43 | IPI00021891 | 1 | 63.4 | N_A | N_A | N_A | 99 | FGG Isoform Gamma-B of Fibrinogen gamma chain precursor | QSGLYFIK                                     | 2 | 618.361   | 2.567 | 0.286 |
| 43 | IPI00021891 | 1 | 63.4 | N_A | N_A | N_A | 99 | FGG Isoform Gamma-B of Fibrinogen gamma chain precursor | n[145]GLYFIK[272]PLK[272]                    | 2 | 755.9898  | 3.012 | 0.296 |
| 43 | IPI00021891 | 1 | 63.4 | N_A | N_A | N_A | 99 | FGG Isoform Gamma-B of Fibrinogen gamma chain precursor | n[145]LYFIK[272]PLK[272]                     | 2 | 727.479   | 3.091 | 0.256 |
| 43 | IPI00021891 | 1 | 63.4 | N_A | N_A | N_A | 99 | FGG Isoform Gamma-B of Fibrinogen gamma chain precursor | n[145]DTVQIHDTG                              | 2 | 621.826   | 2.288 | 0.391 |
| 43 | IPI00021891 | 1 | 63.4 | N_A | N_A | N_A | 99 | FGG Isoform Gamma-B of Fibrinogen gamma chain precursor | LYFIKPLK                                     | 3 | 481.3147  | 1.885 | 0.271 |

|    |             |   |      |     |     |     |    |                                                         |                                 |   |          |       |       |
|----|-------------|---|------|-----|-----|-----|----|---------------------------------------------------------|---------------------------------|---|----------|-------|-------|
| 43 | IPI00021891 | 1 | 63.4 | N_A | N_A | N_A | 99 | FGG Isoform Gamma-B of Fibrinogen gamma chain precursor | n[145]SGLYFIK[272]PLK[272]      | 2 | 799.5058 | 3.404 | 0.239 |
| 43 | IPI00021891 | 1 | 63.4 | N_A | N_A | N_A | 99 | FGG Isoform Gamma-B of Fibrinogen gamma chain precursor | DTVQIHDITG                      | 2 | 619.8224 | 2.759 | 0.286 |
| 43 | IPI00021891 | 1 | 63.4 | N_A | N_A | N_A | 99 | FGG Isoform Gamma-B of Fibrinogen gamma chain precursor | n[145]LTIGEGQQHHLGG             | 3 | 497.5993 | 2.822 | 0.184 |
| 43 | IPI00021891 | 1 | 63.4 | N_A | N_A | N_A | 99 | FGG Isoform Gamma-B of Fibrinogen gamma chain precursor | n[145]FFTSHNGM[147]QF           | 2 | 688.3147 | 2.877 | 0.265 |
| 43 | IPI00021891 | 1 | 63.4 | N_A | N_A | N_A | 99 | FGG Isoform Gamma-B of Fibrinogen gamma chain precursor | SGLYFIKPLK                      | 3 | 529.3325 | 2.977 | 0.136 |
| 43 | IPI00021891 | 1 | 63.4 | N_A | N_A | N_A | 99 | FGG Isoform Gamma-B of Fibrinogen gamma chain precursor | n[145]JSTQSAIPYALR              | 2 | 732.4206 | 3.391 | 0.321 |
| 43 | IPI00021891 | 1 | 63.4 | N_A | N_A | N_A | 99 | FGG Isoform Gamma-B of Fibrinogen gamma chain precursor | n[145]LTIGEGQQHHL               | 2 | 688.8738 | 2.869 | 0.216 |
| 43 | IPI00021891 | 1 | 63.4 | N_A | N_A | N_A | 99 | FGG Isoform Gamma-B of Fibrinogen gamma chain precursor | n[145]YEASILTHDSSIR             | 4 | 409.7169 | 1.687 | 0.015 |
| 43 | IPI00021891 | 1 | 63.4 | N_A | N_A | N_A | 99 | FGG Isoform Gamma-B of Fibrinogen gamma chain precursor | YEASILTHDS                      | 2 | 638.3144 | 1.862 | 0.352 |
| 43 | IPI00021891 | 1 | 63.4 | N_A | N_A | N_A | 99 | FGG Isoform Gamma-B of Fibrinogen gamma chain precursor | KM[147]LEEIMKYEASILTHDSSIR      | 4 | 733.3924 | 3.879 | 0.427 |
| 43 | IPI00021891 | 1 | 63.4 | N_A | N_A | N_A | 99 | FGG Isoform Gamma-B of Fibrinogen gamma chain precursor | n[145]IHLISTQ                   | 2 | 478.2883 | 2.054 | 0.266 |
| 43 | IPI00021891 | 1 | 63.4 | N_A | N_A | N_A | 99 | FGG Isoform Gamma-B of Fibrinogen gamma chain precursor | KMLEEIM[147]KYEASILTHDSSIR      | 4 | 733.3924 | 3.519 | 0.472 |
| 43 | IPI00021891 | 1 | 63.4 | N_A | N_A | N_A | 99 | FGG Isoform Gamma-B of Fibrinogen gamma chain precursor | n[145]FFTSHN                    | 2 | 448.7228 | 2.161 | 0.188 |
| 43 | IPI00021891 | 1 | 63.4 | N_A | N_A | N_A | 99 | FGG Isoform Gamma-B of Fibrinogen gamma chain precursor | n[145]QSGLYFIK[272]PL           | 2 | 727.4365 | 2.447 | 0.395 |
| 43 | IPI00021891 | 1 | 63.4 | N_A | N_A | N_A | 99 | FGG Isoform Gamma-B of Fibrinogen gamma chain precursor | n[145]EGFGHLSPTGTT              | 2 | 674.3367 | 2.533 | 0.223 |
| 43 | IPI00021891 | 1 | 63.4 | N_A | N_A | N_A | 99 | FGG Isoform Gamma-B of Fibrinogen gamma chain precursor | n[145]YEASILTHDS                | 2 | 640.318  | 2.22  | 0.234 |
| 43 | IPI00021891 | 1 | 63.4 | N_A | N_A | N_A | 99 | FGG Isoform Gamma-B of Fibrinogen gamma chain precursor | n[145]FFTSH                     | 2 | 391.7013 | 1.92  | 0.227 |
| 43 | IPI00021891 | 1 | 63.4 | N_A | N_A | N_A | 99 | FGG Isoform Gamma-B of Fibrinogen gamma chain precursor | KM[147]LEEIM[147]KYEASILTHDSSIR | 3 | 982.8525 | 2.812 | 0.121 |
| 43 | IPI00021891 | 1 | 63.4 | N_A | N_A | N_A | 99 | FGG Isoform Gamma-B of Fibrinogen gamma chain precursor | n[145]IHLISTQSAIPY              | 2 | 743.923  | 2.414 | 0.205 |
| 43 | IPI00021891 | 1 | 63.4 | N_A | N_A | N_A | 99 | FGG Isoform Gamma-B of Fibrinogen gamma chain precursor | KM[147]LEEIMKYEASILTHDSSIR      | 3 | 977.5208 | 3.306 | 0.46  |
| 43 | IPI00021891 | 1 | 63.4 | N_A | N_A | N_A | 99 | FGG Isoform Gamma-B of Fibrinogen gamma chain precursor | QSGLYFIKPL                      | 2 | 723.4294 | 1.875 | 0.23  |
| 43 | IPI00021891 | 1 | 63.4 | N_A | N_A | N_A | 99 | FGG Isoform Gamma-B of Fibrinogen gamma chain precursor | n[145]YFIK[272]PLK[272]         | 2 | 670.937  | 2.033 | 0.13  |
| 43 | IPI00021891 | 1 | 63.4 | N_A | N_A | N_A | 99 | FGG Isoform Gamma-B of Fibrinogen gamma chain precursor | YVATR                           | 2 | 375.2189 | 1.994 | 0.107 |
| 43 | IPI00021891 | 1 | 63.4 | N_A | N_A | N_A | 99 | FGG Isoform Gamma-B of Fibrinogen gamma chain precursor | GLYFIKPLK                       | 3 | 500.3218 | 2.139 | 0.144 |
| 43 | IPI00021891 | 1 | 63.4 | N_A | N_A | N_A | 99 | FGG Isoform Gamma-B of Fibrinogen gamma chain precursor | n[145]IHLISTQSAIPYALR           | 2 | 857.4921 | 2.743 | 0.248 |
| 43 | IPI00021891 | 1 | 63.4 | N_A | N_A | N_A | 99 | FGG Isoform Gamma-B of Fibrinogen gamma chain precursor | M[147]IDAATLK                   | 2 | 579.8312 | 2.801 | 0.147 |
| 43 | IPI00021891 | 1 | 63.4 | N_A | N_A | N_A | 99 | FGG Isoform Gamma-B of Fibrinogen gamma chain precursor | YFIKPLK                         | 2 | 664.9263 | 2.041 | 0.169 |
| 43 | IPI00021891 | 1 | 63.4 | N_A | N_A | N_A | 99 | FGG Isoform Gamma-B of Fibrinogen gamma chain precursor | n[145]SILTHDSSIR                | 3 | 424.9058 | 2.689 | 0.065 |
| 43 | IPI00021891 | 1 | 63.4 | N_A | N_A | N_A | 99 | FGG Isoform Gamma-B of Fibrinogen gamma chain precursor | FFTSHN                          | 2 | 446.7192 | 1.767 | 0.192 |
| 43 | IPI00021891 | 1 | 63.4 | N_A | N_A | N_A | 99 | FGG Isoform Gamma-B of Fibrinogen gamma chain precursor | n[145]IHLISTQSAIPYAL            | 2 | 835.9835 | 1.722 | 0.273 |
| 43 | IPI00021891 | 1 | 63.4 | N_A | N_A | N_A | 99 | FGG Isoform Gamma-B of Fibrinogen gamma chain precursor | IHLISTQSAIPY                    | 2 | 741.9194 | 2.17  | 0.169 |
| 43 | IPI00021891 | 1 | 63.4 | N_A | N_A | N_A | 99 | FGG Isoform Gamma-B of Fibrinogen gamma chain precursor | MIDAATLK                        | 2 | 571.8338 | 2.63  | 0.131 |
| 43 | IPI00021891 | 1 | 63.4 | N_A | N_A | N_A | 99 | FGG Isoform Gamma-B of Fibrinogen gamma chain precursor | FFTSH                           | 2 | 389.6978 | 1.74  | 0.137 |
| 43 | IPI00021891 | 1 | 63.4 | N_A | N_A | N_A | 99 | FGG Isoform Gamma-B of Fibrinogen gamma chain precursor | n[145]GLYFIK[272]PLK[272]       | 3 | 504.3289 | 2.159 | 0.114 |
| 43 | IPI00021891 | 1 | 63.4 | N_A | N_A | N_A | 99 | FGG Isoform Gamma-B of Fibrinogen gamma chain precursor | IHLISTQ                         | 2 | 476.2848 | 1.79  | 0.173 |
| 43 | IPI00021891 | 1 | 63.4 | N_A | N_A | N_A | 99 | FGG Isoform Gamma-B of Fibrinogen gamma chain precursor | n[145]FFTSH                     | 1 | 782.3954 | 1.633 | 0.216 |
| 43 | IPI00021891 | 1 | 63.4 | N_A | N_A | N_A | 99 | FGG Isoform Gamma-B of Fibrinogen gamma chain precursor | n[145]MIDAATLK[272]             | 2 | 575.8409 | 2.197 | 0.172 |
| 43 | IPI00021891 | 1 | 63.4 | N_A | N_A | N_A | 99 | FGG Isoform Gamma-B of Fibrinogen gamma chain precursor | TCGIADFLSTYQTK                  | 2 | 937.463  | 4.226 | 0.314 |
| 43 | IPI00021891 | 1 | 63.4 | N_A | N_A | N_A | 99 | FGG Isoform Gamma-B of Fibrinogen gamma chain precursor | SAIPYALR                        | 2 | 515.8059 | 2.267 | 0.008 |
| 43 | IPI00021891 | 1 | 63.4 | N_A | N_A | N_A | 99 | FGG Isoform Gamma-B of Fibrinogen gamma chain precursor | n[145]LYFIK[272]PLK[272]        | 3 | 485.3218 | 2.426 | 0.045 |
| 43 | IPI00021891 | 1 | 63.4 | N_A | N_A | N_A | 99 | FGG Isoform Gamma-B of Fibrinogen gamma chain precursor | n[145]YEASILTHD                 | 2 | 596.802  | 1.94  | 0.09  |
| 43 | IPI00021891 | 1 | 63.4 | N_A | N_A | N_A | 99 | FGG Isoform Gamma-B of Fibrinogen gamma chain precursor | LTIGEGQQH                       | 2 | 561.7988 | 1.874 | 0.079 |
| 43 | IPI00021891 | 1 | 63.4 | N_A | N_A | N_A | 99 | FGG Isoform Gamma-B of Fibrinogen gamma chain precursor | QSGLYF                          | 1 | 854.4407 | 1.393 | 0.317 |
| 43 | IPI00021891 | 1 | 63.4 | N_A | N_A | N_A | 99 | FGG Isoform Gamma-B of Fibrinogen gamma chain precursor | n[145]FIK[272]PLK[272]          | 3 | 393.2726 | 2.208 | 0.024 |
| 43 | IPI00021891 | 1 | 63.4 | N_A | N_A | N_A | 99 | FGG Isoform Gamma-B of Fibrinogen gamma chain precursor | IHLISTQSAIPYAL                  | 2 | 833.98   | 1.798 | 0.058 |
| 43 | IPI00021891 | 1 | 63.4 | N_A | N_A | N_A | 99 | FGG Isoform Gamma-B of Fibrinogen gamma chain precursor | FFTSH                           | 1 | 778.3883 | 1.635 | 0.134 |
| 43 | IPI00021891 | 1 | 63.4 | N_A | N_A | N_A | 99 | FGG Isoform Gamma-B of Fibrinogen gamma chain precursor | n[145]QSGLYF                    | 1 | 858.4478 | 1.427 | 0.281 |
| 43 | IPI00021891 | 1 | 63.4 | N_A | N_A | N_A | 99 | FGG Isoform Gamma-B of Fibrinogen gamma chain precursor | n[145]LTIGEGQQH                 | 2 | 563.8023 | 1.31  | 0.145 |

|    |             |   |      |      |      |     |    |                                                         |                                   |   |           |       |       |
|----|-------------|---|------|------|------|-----|----|---------------------------------------------------------|-----------------------------------|---|-----------|-------|-------|
| 43 | IPI00021891 | 1 | 63.4 | N_A  | N_A  | N_A | 99 | FGG Isoform Gamma-B of Fibrinogen gamma chain precursor | LTYAYF                            | 1 | 917.4768  | 1.334 | 0.289 |
| 44 | IPI00022229 | 1 | 34.7 | 0.84 | 0.11 | 378 | ## | APOB Apolipoprotein B-100 precursor                     | ATFQTPDFIVPLTDLR                  | 2 | 987.5384  | 4.37  | 0.434 |
| 44 | IPI00022229 | 1 | 34.7 | 0.84 | 0.11 | 378 | ## | APOB Apolipoprotein B-100 precursor                     | ATGVLYDYVVK                       | 2 | 761.9169  | 3.637 | 0.507 |
| 44 | IPI00022229 | 1 | 34.7 | 0.84 | 0.11 | 378 | ## | APOB Apolipoprotein B-100 precursor                     | EVGTVLSQVYSK                      | 2 | 795.4485  | 4.291 | 0.334 |
| 44 | IPI00022229 | 1 | 34.7 | 0.84 | 0.11 | 378 | ## | APOB Apolipoprotein B-100 precursor                     | GNVATEISTER                       | 2 | 658.8439  | 3.649 | 0.443 |
| 44 | IPI00022229 | 1 | 34.7 | 0.84 | 0.11 | 378 | ## | APOB Apolipoprotein B-100 precursor                     | KGNVATEISTER                      | 2 | 792.9389  | 4.231 | 0.48  |
| 44 | IPI00022229 | 1 | 34.7 | 0.84 | 0.11 | 378 | ## | APOB Apolipoprotein B-100 precursor                     | LLSGGNLHLVSTTK                    | 2 | 911.0333  | 5.16  | 0.562 |
| 44 | IPI00022229 | 1 | 34.7 | 0.84 | 0.11 | 378 | ## | APOB Apolipoprotein B-100 precursor                     | ITENDIQIALDDAK                    | 2 | 919.9966  | 4.539 | 0.436 |
| 44 | IPI00022229 | 1 | 34.7 | 0.84 | 0.11 | 378 | ## | APOB Apolipoprotein B-100 precursor                     | NIQEYLSILTDPDGK                   | 2 | 993.5308  | 3.292 | 0.533 |
| 44 | IPI00022229 | 1 | 34.7 | 0.84 | 0.11 | 378 | ## | APOB Apolipoprotein B-100 precursor                     | NNALDFVTK                         | 2 | 651.3643  | 3.685 | 0.421 |
| 44 | IPI00022229 | 1 | 34.7 | 0.84 | 0.11 | 378 | ## | APOB Apolipoprotein B-100 precursor                     | NSEEFAAAMSR                       | 2 | 676.8168  | 3.568 | 0.463 |
| 44 | IPI00022229 | 1 | 34.7 | 0.84 | 0.11 | 378 | ## | APOB Apolipoprotein B-100 precursor                     | SVSDGIAALDLNAVANK                 | 2 | 969.5364  | 5.665 | 0.398 |
| 44 | IPI00022229 | 1 | 34.7 | 0.84 | 0.11 | 378 | ## | APOB Apolipoprotein B-100 precursor                     | TKNSEEFAAAM[147]SR                | 2 | 869.4331  | 3.669 | 0.494 |
| 44 | IPI00022229 | 1 | 34.7 | 0.84 | 0.11 | 378 | ## | APOB Apolipoprotein B-100 precursor                     | TIEMSAFGYVFPK                     | 2 | 885.4684  | 4.031 | 0.436 |
| 44 | IPI00022229 | 1 | 34.7 | 0.84 | 0.11 | 378 | ## | APOB Apolipoprotein B-100 precursor                     | TSSFALNPLTLPEVK                   | 2 | 949.0433  | 4.945 | 0.456 |
| 44 | IPI00022229 | 1 | 34.7 | 0.84 | 0.11 | 378 | ## | APOB Apolipoprotein B-100 precursor                     | VLVDHFGYTK                        | 2 | 729.9089  | 4.134 | 0.517 |
| 44 | IPI00022229 | 1 | 34.7 | 0.84 | 0.11 | 378 | ## | APOB Apolipoprotein B-100 precursor                     | VNWEEEAASGLLTSK                   | 2 | 1014.0441 | 6.504 | 0.545 |
| 44 | IPI00022229 | 1 | 34.7 | 0.84 | 0.11 | 378 | ## | APOB Apolipoprotein B-100 precursor                     | n[145]ATGVLYDYVVK[272]            | 2 | 765.924   | 4.846 | 0.475 |
| 44 | IPI00022229 | 1 | 34.7 | 0.84 | 0.11 | 378 | ## | APOB Apolipoprotein B-100 precursor                     | n[145]AVSM[147]PSFSILGSDVR        | 2 | 863.4517  | 3.584 | 0.339 |
| 44 | IPI00022229 | 1 | 34.7 | 0.84 | 0.11 | 378 | ## | APOB Apolipoprotein B-100 precursor                     | n[145]EVGTVLSQVYSK[272]           | 2 | 799.4556  | 4.257 | 0.335 |
| 44 | IPI00022229 | 1 | 34.7 | 0.84 | 0.11 | 378 | ## | APOB Apolipoprotein B-100 precursor                     | n[145]GFPEPTLEALFGK[272]          | 2 | 798.9475  | 4.344 | 0.474 |
| 44 | IPI00022229 | 1 | 34.7 | 0.84 | 0.11 | 378 | ## | APOB Apolipoprotein B-100 precursor                     | n[145]IADFELPTIIVPEQTIIPSIIK[272] | 2 | 1377.7928 | 4.212 | 0.516 |
| 44 | IPI00022229 | 1 | 34.7 | 0.84 | 0.11 | 378 | ## | APOB Apolipoprotein B-100 precursor                     | n[145]LLSGGNLHLVSTTK[272]         | 2 | 915.0404  | 5.559 | 0.572 |
| 44 | IPI00022229 | 1 | 34.7 | 0.84 | 0.11 | 378 | ## | APOB Apolipoprotein B-100 precursor                     | n[145]LPQQANDYLNSFNWER            | 2 | 1070.0224 | 4.332 | 0.478 |
| 44 | IPI00022229 | 1 | 34.7 | 0.84 | 0.11 | 378 | ## | APOB Apolipoprotein B-100 precursor                     | n[145]ITENDIQIALDDAK[272]         | 2 | 924.0037  | 4.895 | 0.481 |
| 44 | IPI00022229 | 1 | 34.7 | 0.84 | 0.11 | 378 | ## | APOB Apolipoprotein B-100 precursor                     | n[145]NNALDFVTK[272]              | 2 | 655.3714  | 3.303 | 0.434 |
| 44 | IPI00022229 | 1 | 34.7 | 0.84 | 0.11 | 378 | ## | APOB Apolipoprotein B-100 precursor                     | n[145]NSEEFAAAM[147]SR            | 2 | 686.8178  | 3.694 | 0.466 |
| 44 | IPI00022229 | 1 | 34.7 | 0.84 | 0.11 | 378 | ## | APOB Apolipoprotein B-100 precursor                     | n[145]SVSDGIAALDLNAVANK[272]      | 2 | 973.5435  | 5.499 | 0.399 |
| 44 | IPI00022229 | 1 | 34.7 | 0.84 | 0.11 | 378 | ## | APOB Apolipoprotein B-100 precursor                     | n[145]TK[272]NSEEFAAAM[147]SR     | 2 | 873.4402  | 3.187 | 0.546 |
| 44 | IPI00022229 | 1 | 34.7 | 0.84 | 0.11 | 378 | ## | APOB Apolipoprotein B-100 precursor                     | n[145]TIEMSAFGYVFPK[272]          | 2 | 889.4755  | 4.636 | 0.49  |
| 44 | IPI00022229 | 1 | 34.7 | 0.84 | 0.11 | 378 | ## | APOB Apolipoprotein B-100 precursor                     | n[145]TSSFALNPLTLPEVK[272]        | 2 | 953.0504  | 4.66  | 0.52  |
| 44 | IPI00022229 | 1 | 34.7 | 0.84 | 0.11 | 378 | ## | APOB Apolipoprotein B-100 precursor                     | n[145]VLVDHFGYTK[272]             | 2 | 733.916   | 3.578 | 0.49  |
| 44 | IPI00022229 | 1 | 34.7 | 0.84 | 0.11 | 378 | ## | APOB Apolipoprotein B-100 precursor                     | n[145]VNDESTEGK[272]TSYR          | 2 | 887.4465  | 3.724 | 0.462 |
| 44 | IPI00022229 | 1 | 34.7 | 0.84 | 0.11 | 378 | ## | APOB Apolipoprotein B-100 precursor                     | n[145]VNWEEEAASGLLTSK[272]        | 2 | 1018.0512 | 5.146 | 0.468 |
| 44 | IPI00022229 | 1 | 34.7 | 0.84 | 0.11 | 378 | ## | APOB Apolipoprotein B-100 precursor                     | n[145]YTYNYEAESSGVPGTADSR         | 2 | 1149.5176 | 6.378 | 0.589 |
| 44 | IPI00022229 | 1 | 34.7 | 0.84 | 0.11 | 378 | ## | APOB Apolipoprotein B-100 precursor                     | AEPLAFTFSHDYK                     | 3 | 602.6456  | 3.843 | 0.359 |
| 44 | IPI00022229 | 1 | 34.7 | 0.84 | 0.11 | 378 | ## | APOB Apolipoprotein B-100 precursor                     | AHLDIAGSLEGLR                     | 3 | 543.6338  | 5.202 | 0.398 |
| 44 | IPI00022229 | 1 | 34.7 | 0.84 | 0.11 | 378 | ## | APOB Apolipoprotein B-100 precursor                     | ASGSLPYTQTLQDHLNSLK               | 3 | 785.0885  | 4.697 | 0.4   |
| 44 | IPI00022229 | 1 | 34.7 | 0.84 | 0.11 | 378 | ## | APOB Apolipoprotein B-100 precursor                     | DKDQEVLLQTFLLDASPDKR              | 3 | 937.4943  | 3.571 | 0.507 |
| 44 | IPI00022229 | 1 | 34.7 | 0.84 | 0.11 | 378 | ## | APOB Apolipoprotein B-100 precursor                     | GISTSAAAPVGTVM[147]DM[147]DEDDDFS | 3 | 972.4356  | 5.865 | 0.574 |
| 44 | IPI00022229 | 1 | 34.7 | 0.84 | 0.11 | 378 | ## | APOB Apolipoprotein B-100 precursor                     | KGNVATEISTER                      | 3 | 528.9617  | 4.645 | 0.413 |
| 44 | IPI00022229 | 1 | 34.7 | 0.84 | 0.11 | 378 | ## | APOB Apolipoprotein B-100 precursor                     | KIISDYHQQFR                       | 3 | 572.3178  | 3.809 | 0.436 |
| 44 | IPI00022229 | 1 | 34.7 | 0.84 | 0.11 | 378 | ## | APOB Apolipoprotein B-100 precursor                     | KLTISEQNIQR                       | 3 | 537.3177  | 2.091 | 0.229 |
| 44 | IPI00022229 | 1 | 34.7 | 0.84 | 0.11 | 378 | ## | APOB Apolipoprotein B-100 precursor                     | KM[147]GLAFESTK                   | 3 | 516.6253  | 3.103 | 0.375 |
| 44 | IPI00022229 | 1 | 34.7 | 0.84 | 0.11 | 378 | ## | APOB Apolipoprotein B-100 precursor                     | KM[147]TSNFPVDLSDYPK              | 3 | 726.7137  | 4.329 | 0.474 |
| 44 | IPI00022229 | 1 | 34.7 | 0.84 | 0.11 | 378 | ## | APOB Apolipoprotein B-100 precursor                     | KYTYNYEAESSGVPGTADSR              | 3 | 854.7418  | 4.207 | 0.361 |
| 44 | IPI00022229 | 1 | 34.7 | 0.84 | 0.11 | 378 | ## | APOB Apolipoprotein B-100 precursor                     | IHSGSFQSQVELSNDQEK                | 3 | 771.7205  | 4.571 | 0.373 |
| 44 | IPI00022229 | 1 | 34.7 | 0.84 | 0.11 | 378 | ## | APOB Apolipoprotein B-100 precursor                     | ILGEELGFASLHDLQLLQGLK             | 3 | 778.4458  | 6.146 | 0.581 |

|    |             |   |      |      |      |     |     |                                     |                                        |   |          |       |       |
|----|-------------|---|------|------|------|-----|-----|-------------------------------------|----------------------------------------|---|----------|-------|-------|
| 44 | IPI00022229 | 1 | 34.7 | 0.84 | 0.11 | 378 | ### | APOB Apolipoprotein B-100 precursor | LLLQM[147]DSSATAYGSTVSKR               | 3 | 775.4142 | 3.194 | 0.336 |
| 44 | IPI00022229 | 1 | 34.7 | 0.84 | 0.11 | 378 | ### | APOB Apolipoprotein B-100 precursor | NHLQLEGLFFTNGEHTSK                     | 3 | 784.7414 | 4.731 | 0.438 |
| 44 | IPI00022229 | 1 | 34.7 | 0.84 | 0.11 | 378 | ### | APOB Apolipoprotein B-100 precursor | QVFLYPEKDEPTYILNIK                     | 3 | 877.4913 | 5.05  | 0.47  |
| 44 | IPI00022229 | 1 | 34.7 | 0.84 | 0.11 | 378 | ### | APOB Apolipoprotein B-100 precursor | QVFLYPEKDEPTYILNIKR                    | 3 | 929.525  | 4.681 | 0.468 |
| 44 | IPI00022229 | 1 | 34.7 | 0.84 | 0.11 | 378 | ### | APOB Apolipoprotein B-100 precursor | SGVQM[147]NTNFFHESGLEAHVALK            | 3 | 904.7903 | 5.934 | 0.605 |
| 44 | IPI00022229 | 1 | 34.7 | 0.84 | 0.11 | 378 | ### | APOB Apolipoprotein B-100 precursor | SKPTVSSSM[147]EFK                      | 3 | 588.6502 | 4.932 | 0.407 |
| 44 | IPI00022229 | 1 | 34.7 | 0.84 | 0.11 | 378 | ### | APOB Apolipoprotein B-100 precursor | SLDEHYHIR                              | 3 | 437.2264 | 3.603 | 0.432 |
| 44 | IPI00022229 | 1 | 34.7 | 0.84 | 0.11 | 378 | ### | APOB Apolipoprotein B-100 precursor | SNTVASLHTEK                            | 3 | 489.6036 | 3.558 | 0.331 |
| 44 | IPI00022229 | 1 | 34.7 | 0.84 | 0.11 | 378 | ### | APOB Apolipoprotein B-100 precursor | TILGTM[147]PAFEVSLQALQK                | 3 | 748.4205 | 3.687 | 0.371 |
| 44 | IPI00022229 | 1 | 34.7 | 0.84 | 0.11 | 378 | ### | APOB Apolipoprotein B-100 precursor | TSQCTLKEVYGFNPEGK                      | 3 | 789.7327 | 5.047 | 0.45  |
| 44 | IPI00022229 | 1 | 34.7 | 0.84 | 0.11 | 378 | ### | APOB Apolipoprotein B-100 precursor | VLVDHFGYTK                             | 3 | 486.9417 | 2.617 | 0.145 |
| 44 | IPI00022229 | 1 | 34.7 | 0.84 | 0.11 | 378 | ### | APOB Apolipoprotein B-100 precursor | n[145]AEPLAFTFSDHYK[272]               | 3 | 605.317  | 4.63  | 0.559 |
| 44 | IPI00022229 | 1 | 34.7 | 0.84 | 0.11 | 378 | ### | APOB Apolipoprotein B-100 precursor | n[145]AHLDIAGSLEGLHR                   | 3 | 544.9695 | 3.241 | 0.4   |
| 44 | IPI00022229 | 1 | 34.7 | 0.84 | 0.11 | 378 | ### | APOB Apolipoprotein B-100 precursor | n[145]ASGSLPYTQTLQDHLNSLK[272]         | 3 | 787.7599 | 4.884 | 0.419 |
| 44 | IPI00022229 | 1 | 34.7 | 0.84 | 0.11 | 378 | ### | APOB Apolipoprotein B-100 precursor | n[145]ATGVLYDYVNK[272]                 | 3 | 510.9517 | 3.669 | 0.357 |
| 44 | IPI00022229 | 1 | 34.7 | 0.84 | 0.11 | 378 | ### | APOB Apolipoprotein B-100 precursor | n[145]LLLQM[147]DSSATAYGSTVSK[272]R    | 3 | 778.0856 | 4.345 | 0.501 |
| 44 | IPI00022229 | 1 | 34.7 | 0.84 | 0.11 | 378 | ### | APOB Apolipoprotein B-100 precursor | n[145]NK[272]YGM[147]VAQVTQTLK[272]    | 3 | 677.0541 | 4.763 | 0.466 |
| 44 | IPI00022229 | 1 | 34.7 | 0.84 | 0.11 | 378 | ### | APOB Apolipoprotein B-100 precursor | n[145]QVFLYPEK[272]DEPTYILNIK[272]     | 3 | 881.4984 | 4.386 | 0.416 |
| 44 | IPI00022229 | 1 | 34.7 | 0.84 | 0.11 | 378 | ### | APOB Apolipoprotein B-100 precursor | n[145]SGVQM[147]NTNFFHESGLEAHVALK[272] | 3 | 907.4617 | 5.909 | 0.498 |
| 44 | IPI00022229 | 1 | 34.7 | 0.84 | 0.11 | 378 | ### | APOB Apolipoprotein B-100 precursor | n[145]SK[272]PTVSSSM[147]EFK[272]      | 3 | 592.6573 | 4.031 | 0.343 |
| 44 | IPI00022229 | 1 | 34.7 | 0.84 | 0.11 | 378 | ### | APOB Apolipoprotein B-100 precursor | n[145]SPAFTDLHLR                       | 3 | 434.2425 | 3.995 | 0.361 |
| 44 | IPI00022229 | 1 | 34.7 | 0.84 | 0.11 | 378 | ### | APOB Apolipoprotein B-100 precursor | n[145]TK[272]NSEEFAAAM[147]SR          | 3 | 582.6292 | 4.825 | 0.439 |
| 44 | IPI00022229 | 1 | 34.7 | 0.84 | 0.11 | 378 | ### | APOB Apolipoprotein B-100 precursor | n[145]TIHDLHLFIENIDFNK[272]            | 3 | 753.0788 | 4.273 | 0.407 |
| 44 | IPI00022229 | 1 | 34.7 | 0.84 | 0.11 | 378 | ### | APOB Apolipoprotein B-100 precursor | n[145]TILGTM[147]PAFEVSLQALQK[272]     | 3 | 751.0919 | 2.357 | 0.29  |
| 44 | IPI00022229 | 1 | 34.7 | 0.84 | 0.11 | 378 | ### | APOB Apolipoprotein B-100 precursor | AHLDIAGSLEGLHR                         | 4 | 407.9772 | 4.49  | 0.466 |
| 44 | IPI00022229 | 1 | 34.7 | 0.84 | 0.11 | 378 | ### | APOB Apolipoprotein B-100 precursor | DKDQEVLLQTFLLDDASPGDKR                 | 4 | 703.3726 | 4.134 | 0.508 |
| 44 | IPI00022229 | 1 | 34.7 | 0.84 | 0.11 | 378 | ### | APOB Apolipoprotein B-100 precursor | QVFLYPEKDEPTYILNIKR                    | 4 | 697.3956 | 3.337 | 0.305 |
| 44 | IPI00022229 | 1 | 34.7 | 0.84 | 0.11 | 378 | ### | APOB Apolipoprotein B-100 precursor | n[145]LEIQSQVDSQHVGHVSLTAK[272]        | 4 | 616.8404 | 3.634 | 0.154 |
| 44 | IPI00022229 | 1 | 34.7 | 0.84 | 0.11 | 378 | ### | APOB Apolipoprotein B-100 precursor | n[145]NHLQLEGLFFTNGEHTSK[272]          | 4 | 590.8114 | 4.386 | 0.364 |
| 44 | IPI00022229 | 1 | 34.7 | 0.84 | 0.11 | 378 | ### | APOB Apolipoprotein B-100 precursor | n[145]QVFLYPEK[272]DEPTYILNIK[272]R    | 4 | 700.4009 | 4.749 | 0.499 |
| 44 | IPI00022229 | 1 | 34.7 | 0.84 | 0.11 | 378 | ### | APOB Apolipoprotein B-100 precursor | n[145]SGVQM[147]NTNFFHESGLEAHVALK[272] | 4 | 680.8481 | 3.865 | 0.505 |
| 44 | IPI00022229 | 1 | 34.7 | 0.84 | 0.11 | 378 | ### | APOB Apolipoprotein B-100 precursor | GFPTLEALFGK                            | 2 | 794.9404 | 3.631 | 0.434 |
| 44 | IPI00022229 | 1 | 34.7 | 0.84 | 0.11 | 378 | ### | APOB Apolipoprotein B-100 precursor | n[145]QGFFPDSVKN[272]                  | 2 | 713.8821 | 3.574 | 0.335 |
| 44 | IPI00022229 | 1 | 34.7 | 0.84 | 0.11 | 378 | ### | APOB Apolipoprotein B-100 precursor | ATGVLYDYVNK                            | 3 | 508.2803 | 2.897 | 0.282 |
| 44 | IPI00022229 | 1 | 34.7 | 0.84 | 0.11 | 378 | ### | APOB Apolipoprotein B-100 precursor | DKAQNLYQELLTQEQQASFQGLK                | 3 | 1010.54  | 3.642 | 0.361 |
| 44 | IPI00022229 | 1 | 34.7 | 0.84 | 0.11 | 378 | ### | APOB Apolipoprotein B-100 precursor | EFNLQNM[147]GLPDFHIPENLFLK             | 3 | 938.1546 | 4.22  | 0.383 |
| 44 | IPI00022229 | 1 | 34.7 | 0.84 | 0.11 | 378 | ### | APOB Apolipoprotein B-100 precursor | IISDYHQQFR                             | 3 | 482.9211 | 2.667 | 0.32  |
| 44 | IPI00022229 | 1 | 34.7 | 0.84 | 0.11 | 378 | ### | APOB Apolipoprotein B-100 precursor | LTLDIQNKK                              | 3 | 498.3119 | 2.758 | 0.296 |
| 44 | IPI00022229 | 1 | 34.7 | 0.84 | 0.11 | 378 | ### | APOB Apolipoprotein B-100 precursor | SPAFTDLHLR                             | 3 | 432.9068 | 3.439 | 0.272 |
| 44 | IPI00022229 | 1 | 34.7 | 0.84 | 0.11 | 378 | ### | APOB Apolipoprotein B-100 precursor | STSPPKQAEAVLK                          | 3 | 592.6841 | 3.349 | 0.342 |
| 44 | IPI00022229 | 1 | 34.7 | 0.84 | 0.11 | 378 | ### | APOB Apolipoprotein B-100 precursor | TKNSEEFAAAM[147]SR                     | 3 | 579.9578 | 3.608 | 0.358 |
| 44 | IPI00022229 | 1 | 34.7 | 0.84 | 0.11 | 378 | ### | APOB Apolipoprotein B-100 precursor | n[145]FFGEGTK[272]K[272]               | 3 | 449.2662 | 2.616 | 0.357 |
| 44 | IPI00022229 | 1 | 34.7 | 0.84 | 0.11 | 378 | ### | APOB Apolipoprotein B-100 precursor | n[145]HINIDQFVR                        | 3 | 429.2426 | 2.816 | 0.349 |
| 44 | IPI00022229 | 1 | 34.7 | 0.84 | 0.11 | 378 | ### | APOB Apolipoprotein B-100 precursor | n[145]ILGEELGFASLHDLQLLQK[272]         | 3 | 781.1172 | 3.059 | 0.318 |
| 44 | IPI00022229 | 1 | 34.7 | 0.84 | 0.11 | 378 | ### | APOB Apolipoprotein B-100 precursor | n[145]IISDYHQQFR                       | 3 | 484.2568 | 2.529 | 0.174 |
| 44 | IPI00022229 | 1 | 34.7 | 0.84 | 0.11 | 378 | ### | APOB Apolipoprotein B-100 precursor | n[145]LLSGGNTLHLVSTTK[272]             | 3 | 610.3627 | 3.021 | 0.284 |
| 44 | IPI00022229 | 1 | 34.7 | 0.84 | 0.11 | 378 | ### | APOB Apolipoprotein B-100 precursor | n[145]INDVLEHVK[272]                   | 3 | 452.2693 | 3.178 | 0.238 |
| 44 | IPI00022229 | 1 | 34.7 | 0.84 | 0.11 | 378 | ### | APOB Apolipoprotein B-100 precursor | n[145]NSLK[272]IEIPLPFGGK[272]         | 3 | 649.0664 | 3.974 | 0.365 |

|    |             |   |      |      |      |     |    |                                     |                                       |   |          |       |       |
|----|-------------|---|------|------|------|-----|----|-------------------------------------|---------------------------------------|---|----------|-------|-------|
| 44 | IP100022229 | 1 | 34.7 | 0.84 | 0.11 | 378 | ## | APOB Apolipoprotein B-100 precursor | n[145]QVFLYPEK[272]DEPTYILNIK[272]R   | 3 | 933.5321 | 4.364 | 0.342 |
| 44 | IP100022229 | 1 | 34.7 | 0.84 | 0.11 | 378 | ## | APOB Apolipoprotein B-100 precursor | n[145]SISAALHKK[272]                  | 3 | 415.2465 | 4.079 | 0.226 |
| 44 | IP100022229 | 1 | 34.7 | 0.84 | 0.11 | 378 | ## | APOB Apolipoprotein B-100 precursor | n[145]SNTVASLHTEK[272]                | 3 | 492.275  | 3.299 | 0.329 |
| 44 | IP100022229 | 1 | 34.7 | 0.84 | 0.11 | 378 | ## | APOB Apolipoprotein B-100 precursor | n[145]STSPPK[272]QAEAVLK[272]         | 3 | 596.6912 | 2.72  | 0.044 |
| 44 | IP100022229 | 1 | 34.7 | 0.84 | 0.11 | 378 | ## | APOB Apolipoprotein B-100 precursor | n[145]TSSFALNLTLPVVK[272]             | 3 | 635.7027 | 2.342 | 0.022 |
| 44 | IP100022229 | 1 | 34.7 | 0.84 | 0.11 | 378 | ## | APOB Apolipoprotein B-100 precursor | n[145]VLVDHFGYTK[272]                 | 3 | 489.6131 | 1.98  | 0.076 |
| 44 | IP100022229 | 1 | 34.7 | 0.84 | 0.11 | 378 | ## | APOB Apolipoprotein B-100 precursor | n[145]VPLLLSEPINIIDALEM[147]R         | 3 | 732.7525 | 4.117 | 0.369 |
| 44 | IP100022229 | 1 | 34.7 | 0.84 | 0.11 | 378 | ## | APOB Apolipoprotein B-100 precursor | n[145]VPSYTLILPSLELPLVHVPR            | 3 | 796.4776 | 4.309 | 0.355 |
| 44 | IP100022229 | 1 | 34.7 | 0.84 | 0.11 | 378 | ## | APOB Apolipoprotein B-100 precursor | n[145]WNFYSPQSSPDKK                   | 3 | 724.3729 | 4.17  | 0.387 |
| 44 | IP100022229 | 1 | 34.7 | 0.84 | 0.11 | 378 | ## | APOB Apolipoprotein B-100 precursor | n[145]AHLDIAGSLEGLR                   | 4 | 408.9789 | 2.928 | 0.262 |
| 44 | IP100022229 | 1 | 34.7 | 0.84 | 0.11 | 378 | ## | APOB Apolipoprotein B-100 precursor | n[145]YHWEHTGLTLR                     | 4 | 389.9577 | 3.031 | 0.267 |
| 44 | IP100022229 | 1 | 34.7 | 0.84 | 0.11 | 378 | ## | APOB Apolipoprotein B-100 precursor | ALVEQGFVPEIK                          | 2 | 855.9931 | 3.85  | 0.403 |
| 44 | IP100022229 | 1 | 34.7 | 0.84 | 0.11 | 378 | ## | APOB Apolipoprotein B-100 precursor | KIISDYHQFR                            | 2 | 857.973  | 4.028 | 0.386 |
| 44 | IP100022229 | 1 | 34.7 | 0.84 | 0.11 | 378 | ## | APOB Apolipoprotein B-100 precursor | KLTISEQQNR                            | 2 | 805.4729 | 3.461 | 0.406 |
| 44 | IP100022229 | 1 | 34.7 | 0.84 | 0.11 | 378 | ## | APOB Apolipoprotein B-100 precursor | IAELSATAQEIHK                         | 2 | 833.9906 | 4.314 | 0.336 |
| 44 | IP100022229 | 1 | 34.7 | 0.84 | 0.11 | 378 | ## | APOB Apolipoprotein B-100 precursor | MGLAFESTK                             | 2 | 632.342  | 3     | 0.397 |
| 44 | IP100022229 | 1 | 34.7 | 0.84 | 0.11 | 378 | ## | APOB Apolipoprotein B-100 precursor | NPNGYSFSPVK                           | 2 | 801.9356 | 4.038 | 0.346 |
| 44 | IP100022229 | 1 | 34.7 | 0.84 | 0.11 | 378 | ## | APOB Apolipoprotein B-100 precursor | SISAALHKK                             | 2 | 618.359  | 3.466 | 0.35  |
| 44 | IP100022229 | 1 | 34.7 | 0.84 | 0.11 | 378 | ## | APOB Apolipoprotein B-100 precursor | SVSLPLSDPASAK                         | 2 | 776.4407 | 3.38  | 0.189 |
| 44 | IP100022229 | 1 | 34.7 | 0.84 | 0.11 | 378 | ## | APOB Apolipoprotein B-100 precursor | VSTAFVYTK                             | 2 | 648.3716 | 2.945 | 0.438 |
| 44 | IP100022229 | 1 | 34.7 | 0.84 | 0.11 | 378 | ## | APOB Apolipoprotein B-100 precursor | n[145]LAAYLM[147]LM[147]R             | 2 | 629.3444 | 2.395 | 0.372 |
| 44 | IP100022229 | 1 | 34.7 | 0.84 | 0.11 | 378 | ## | APOB Apolipoprotein B-100 precursor | n[145]IAELSATAQEIHK[272]              | 2 | 837.9977 | 4.454 | 0.264 |
| 44 | IP100022229 | 1 | 34.7 | 0.84 | 0.11 | 378 | ## | APOB Apolipoprotein B-100 precursor | n[145]IISDYHQFR                       | 2 | 725.8816 | 3.257 | 0.419 |
| 44 | IP100022229 | 1 | 34.7 | 0.84 | 0.11 | 378 | ## | APOB Apolipoprotein B-100 precursor | n[145]NIQEYLSILTDPDGK[272]            | 2 | 997.5379 | 3.362 | 0.424 |
| 44 | IP100022229 | 1 | 34.7 | 0.84 | 0.11 | 378 | ## | APOB Apolipoprotein B-100 precursor | n[145]NPNGYSFSPVK[272]                | 2 | 805.9427 | 3.851 | 0.379 |
| 44 | IP100022229 | 1 | 34.7 | 0.84 | 0.11 | 378 | ## | APOB Apolipoprotein B-100 precursor | n[145]SNTVASLHTEK[272]                | 2 | 737.9089 | 3.581 | 0.382 |
| 44 | IP100022229 | 1 | 34.7 | 0.84 | 0.11 | 378 | ## | APOB Apolipoprotein B-100 precursor | n[145]SVSLPLSDPASAK[272]              | 2 | 780.4478 | 3.103 | 0.09  |
| 44 | IP100022229 | 1 | 34.7 | 0.84 | 0.11 | 378 | ## | APOB Apolipoprotein B-100 precursor | n[145]TLQGIPQM[147]IGE VIR            | 2 | 857.9858 | 2.598 | 0.184 |
| 44 | IP100022229 | 1 | 34.7 | 0.84 | 0.11 | 378 | ## | APOB Apolipoprotein B-100 precursor | n[145]VNDESTEGK[272]                  | 2 | 633.8245 | 3.1   | 0.423 |
| 44 | IP100022229 | 1 | 34.7 | 0.84 | 0.11 | 378 | ## | APOB Apolipoprotein B-100 precursor | n[145]VSTAFVYTK[272]                  | 2 | 652.3787 | 2.904 | 0.421 |
| 44 | IP100022229 | 1 | 34.7 | 0.84 | 0.11 | 378 | ## | APOB Apolipoprotein B-100 precursor | FQFPGKPGIYTR                          | 3 | 564.3191 | 2.803 | 0.271 |
| 44 | IP100022229 | 1 | 34.7 | 0.84 | 0.11 | 378 | ## | APOB Apolipoprotein B-100 precursor | SISAALHKK                             | 3 | 412.5751 | 2.925 | 0.229 |
| 44 | IP100022229 | 1 | 34.7 | 0.84 | 0.11 | 378 | ## | APOB Apolipoprotein B-100 precursor | n[145]CVQSTK[272]PSLM[147]IQK[272]    | 3 | 653.0264 | 2.76  | 0.273 |
| 44 | IP100022229 | 1 | 34.7 | 0.84 | 0.11 | 378 | ## | APOB Apolipoprotein B-100 precursor | n[145]EFNLQNM[147]GLPDFHIPENLFLK[272] | 3 | 940.826  | 4.717 | 0.354 |
| 44 | IP100022229 | 1 | 34.7 | 0.84 | 0.11 | 378 | ## | APOB Apolipoprotein B-100 precursor | n[145]VQGVFEFSHR                      | 3 | 401.5515 | 3.168 | 0.193 |
| 44 | IP100022229 | 1 | 34.7 | 0.84 | 0.11 | 378 | ## | APOB Apolipoprotein B-100 precursor | ESDEETQIK                             | 2 | 679.8436 | 3.687 | 0.322 |
| 44 | IP100022229 | 1 | 34.7 | 0.84 | 0.11 | 378 | ## | APOB Apolipoprotein B-100 precursor | HVAEAIK                               | 2 | 598.8176 | 3.014 | 0.372 |
| 44 | IP100022229 | 1 | 34.7 | 0.84 | 0.11 | 378 | ## | APOB Apolipoprotein B-100 precursor | LDVTTSIGR                             | 2 | 551.3168 | 2.453 | 0.295 |
| 44 | IP100022229 | 1 | 34.7 | 0.84 | 0.11 | 378 | ## | APOB Apolipoprotein B-100 precursor | QGFFPDSVNK                            | 2 | 709.875  | 3.353 | 0.37  |
| 44 | IP100022229 | 1 | 34.7 | 0.84 | 0.11 | 378 | ## | APOB Apolipoprotein B-100 precursor | SLHMYANR                              | 2 | 566.29   | 3.121 | 0.307 |
| 44 | IP100022229 | 1 | 34.7 | 0.84 | 0.11 | 378 | ## | APOB Apolipoprotein B-100 precursor | TGISPLALIK                            | 2 | 646.9187 | 3.34  | 0.295 |
| 44 | IP100022229 | 1 | 34.7 | 0.84 | 0.11 | 378 | ## | APOB Apolipoprotein B-100 precursor | VNDESTEGK                             | 2 | 629.8174 | 3.137 | 0.4   |
| 44 | IP100022229 | 1 | 34.7 | 0.84 | 0.11 | 378 | ## | APOB Apolipoprotein B-100 precursor | YHWEHTGLTLR                           | 2 | 776.9046 | 3.123 | 0.416 |
| 44 | IP100022229 | 1 | 34.7 | 0.84 | 0.11 | 378 | ## | APOB Apolipoprotein B-100 precursor | n[145]AVSMSPFSILGSDVR                 | 2 | 855.4543 | 2.991 | 0.371 |
| 44 | IP100022229 | 1 | 34.7 | 0.84 | 0.11 | 378 | ## | APOB Apolipoprotein B-100 precursor | n[145]EFQVPTFTIPK[272]                | 2 | 797.9578 | 3.291 | 0.325 |
| 44 | IP100022229 | 1 | 34.7 | 0.84 | 0.11 | 378 | ## | APOB Apolipoprotein B-100 precursor | n[145]FVTQAEAGAK[272]                 | 2 | 619.8528 | 2.533 | 0.238 |
| 44 | IP100022229 | 1 | 34.7 | 0.84 | 0.11 | 378 | ## | APOB Apolipoprotein B-100 precursor | n[145]NSEEFAAAMSR                     | 2 | 678.8204 | 3.733 | 0.309 |
| 44 | IP100022229 | 1 | 34.7 | 0.84 | 0.11 | 378 | ## | APOB Apolipoprotein B-100 precursor | n[145]SPSQADINK[272]                  | 2 | 624.3454 | 3.905 | 0.214 |

|    |             |   |      |      |      |     |    |                                     |                                           |   |           |       |       |
|----|-------------|---|------|------|------|-----|----|-------------------------------------|-------------------------------------------|---|-----------|-------|-------|
| 44 | IPI00022229 | 1 | 34.7 | 0.84 | 0.11 | 378 | ## | APOB Apolipoprotein B-100 precursor | n[145]TGISPLALIK[272]                     | 2 | 650.9258  | 3.718 | 0.363 |
| 44 | IPI00022229 | 1 | 34.7 | 0.84 | 0.11 | 378 | ## | APOB Apolipoprotein B-100 precursor | EKLTALTK                                  | 3 | 441.9502  | 3.479 | 0.218 |
| 44 | IPI00022229 | 1 | 34.7 | 0.84 | 0.11 | 378 | ## | APOB Apolipoprotein B-100 precursor | KSISAALEHK                                | 3 | 501.9717  | 3.268 | 0.182 |
| 44 | IPI00022229 | 1 | 34.7 | 0.84 | 0.11 | 378 | ## | APOB Apolipoprotein B-100 precursor | VKYTLNK                                   | 3 | 429.2712  | 2.513 | 0.303 |
| 44 | IPI00022229 | 1 | 34.7 | 0.84 | 0.11 | 378 | ## | APOB Apolipoprotein B-100 precursor | VRESDEETQIK                               | 3 | 538.6213  | 3.359 | 0.269 |
| 44 | IPI00022229 | 1 | 34.7 | 0.84 | 0.11 | 378 | ## | APOB Apolipoprotein B-100 precursor | FQFPGKPGIYTR                              | 2 | 845.9751  | 3.449 | 0.31  |
| 44 | IPI00022229 | 1 | 34.7 | 0.84 | 0.11 | 378 | ## | APOB Apolipoprotein B-100 precursor | IADFELPTIIVPEQTIEIPSIK                    | 2 | 1373.7857 | 2.845 | 0.434 |
| 44 | IPI00022229 | 1 | 34.7 | 0.84 | 0.11 | 378 | ## | APOB Apolipoprotein B-100 precursor | NSEFAAAM[147]SR                           | 2 | 684.8143  | 3.185 | 0.395 |
| 44 | IPI00022229 | 1 | 34.7 | 0.84 | 0.11 | 378 | ## | APOB Apolipoprotein B-100 precursor | SVGFHLPSR                                 | 2 | 570.3197  | 2.942 | 0.305 |
| 44 | IPI00022229 | 1 | 34.7 | 0.84 | 0.11 | 378 | ## | APOB Apolipoprotein B-100 precursor | TLQGIPQM[147]IGEVR                        | 2 | 855.9822  | 2.488 | 0.308 |
| 44 | IPI00022229 | 1 | 34.7 | 0.84 | 0.11 | 378 | ## | APOB Apolipoprotein B-100 precursor | n[145]HVAEAICK[272]                       | 2 | 602.8247  | 2.907 | 0.329 |
| 44 | IPI00022229 | 1 | 34.7 | 0.84 | 0.11 | 378 | ## | APOB Apolipoprotein B-100 precursor | n[145]IEGNLIFDPNNYLPK[272]                | 2 | 1018.0588 | 2.363 | 0.27  |
| 44 | IPI00022229 | 1 | 34.7 | 0.84 | 0.11 | 378 | ## | APOB Apolipoprotein B-100 precursor | n[145]GVELTGR                             | 2 | 494.799   | 2.981 | 0.281 |
| 44 | IPI00022229 | 1 | 34.7 | 0.84 | 0.11 | 378 | ## | APOB Apolipoprotein B-100 precursor | NKYGM[147]VAQVTQTLK                       | 3 | 673.047   | 4.326 | 0.415 |
| 44 | IPI00022229 | 1 | 34.7 | 0.84 | 0.11 | 378 | ## | APOB Apolipoprotein B-100 precursor | SLHMYANR                                  | 3 | 377.8624  | 2.816 | 0.193 |
| 44 | IPI00022229 | 1 | 34.7 | 0.84 | 0.11 | 378 | ## | APOB Apolipoprotein B-100 precursor | n[145]ANLFNK[272]LVTELR                   | 3 | 569.345   | 2.717 | 0.309 |
| 44 | IPI00022229 | 1 | 34.7 | 0.84 | 0.11 | 378 | ## | APOB Apolipoprotein B-100 precursor | n[145]GISTSAAASPAVGTVM[147]DM[147]DEDDDFS | 3 | 975.107   | 2.933 | 0.307 |
| 44 | IPI00022229 | 1 | 34.7 | 0.84 | 0.11 | 378 | ## | APOB Apolipoprotein B-100 precursor | n[145]YHWEHTGLTLR                         | 3 | 519.6079  | 2.801 | 0.223 |
| 44 | IPI00022229 | 1 | 34.7 | 0.84 | 0.11 | 378 | ## | APOB Apolipoprotein B-100 precursor | EFQVPTFTIPK                               | 2 | 793.9507  | 2.655 | 0.248 |
| 44 | IPI00022229 | 1 | 34.7 | 0.84 | 0.11 | 378 | ## | APOB Apolipoprotein B-100 precursor | IGVELTGR                                  | 2 | 492.7955  | 2.292 | 0.134 |
| 44 | IPI00022229 | 1 | 34.7 | 0.84 | 0.11 | 378 | ## | APOB Apolipoprotein B-100 precursor | SLWDFLK                                   | 2 | 594.8425  | 2.856 | 0.236 |
| 44 | IPI00022229 | 1 | 34.7 | 0.84 | 0.11 | 378 | ## | APOB Apolipoprotein B-100 precursor | n[145]ESDEETQIK[272]                      | 2 | 683.8507  | 2.96  | 0.312 |
| 44 | IPI00022229 | 1 | 34.7 | 0.84 | 0.11 | 378 | ## | APOB Apolipoprotein B-100 precursor | n[145]FQFPGK[272]PGIYTR                   | 2 | 849.9822  | 3.234 | 0.292 |
| 44 | IPI00022229 | 1 | 34.7 | 0.84 | 0.11 | 378 | ## | APOB Apolipoprotein B-100 precursor | n[145]LTISEQNIQR                          | 2 | 673.3815  | 3.436 | 0.212 |
| 44 | IPI00022229 | 1 | 34.7 | 0.84 | 0.11 | 378 | ## | APOB Apolipoprotein B-100 precursor | n[145]SISAALEHK[272]                      | 2 | 622.3661  | 3.364 | 0.328 |
| 44 | IPI00022229 | 1 | 34.7 | 0.84 | 0.11 | 378 | ## | APOB Apolipoprotein B-100 precursor | n[145]SPAFTDLHLR                          | 2 | 650.8602  | 2.884 | 0.277 |
| 44 | IPI00022229 | 1 | 34.7 | 0.84 | 0.11 | 378 | ## | APOB Apolipoprotein B-100 precursor | n[145]VQGVFESH                            | 2 | 601.8236  | 2.672 | 0.301 |
| 44 | IPI00022229 | 1 | 34.7 | 0.84 | 0.11 | 378 | ## | APOB Apolipoprotein B-100 precursor | YHWEHTGLTLR                               | 4 | 388.956   | 2.448 | 0.224 |
| 44 | IPI00022229 | 1 | 34.7 | 0.84 | 0.11 | 378 | ## | APOB Apolipoprotein B-100 precursor | IEIPLPFGGK                                | 2 | 675.9109  | 2.714 | 0.274 |
| 44 | IPI00022229 | 1 | 34.7 | 0.84 | 0.11 | 378 | ## | APOB Apolipoprotein B-100 precursor | n[145]LGNNPVSK[272]                       | 2 | 558.8344  | 2.735 | 0.313 |
| 44 | IPI00022229 | 1 | 34.7 | 0.84 | 0.11 | 378 | ## | APOB Apolipoprotein B-100 precursor | n[145]LPYTIITTPPLK[272]                   | 2 | 823.0126  | 2.883 | 0.368 |
| 44 | IPI00022229 | 1 | 34.7 | 0.84 | 0.11 | 378 | ## | APOB Apolipoprotein B-100 precursor | n[145]MGLAFESTK[272]                      | 2 | 636.3491  | 1.653 | 0.178 |
| 44 | IPI00022229 | 1 | 34.7 | 0.84 | 0.11 | 378 | ## | APOB Apolipoprotein B-100 precursor | n[145]YHWEHTGLTLR                         | 2 | 778.9082  | 3.378 | 0.313 |
| 44 | IPI00022229 | 1 | 34.7 | 0.84 | 0.11 | 378 | ## | APOB Apolipoprotein B-100 precursor | n[145]DDK[272]HEQDMVNGIM[147]LSVEK[272]   | 3 | 846.0965  | 3.136 | 0.28  |
| 44 | IPI00022229 | 1 | 34.7 | 0.84 | 0.11 | 378 | ## | APOB Apolipoprotein B-100 precursor | n[145]VK[272]YTLNK[272]                   | 3 | 433.2783  | 3.225 | 0.194 |
| 44 | IPI00022229 | 1 | 34.7 | 0.84 | 0.11 | 378 | ## | APOB Apolipoprotein B-100 precursor | FVTQAEQAK                                 | 2 | 615.8457  | 2.672 | 0.179 |
| 44 | IPI00022229 | 1 | 34.7 | 0.84 | 0.11 | 378 | ## | APOB Apolipoprotein B-100 precursor | IEDGTLASK                                 | 2 | 607.343   | 2.769 | 0.172 |
| 44 | IPI00022229 | 1 | 34.7 | 0.84 | 0.11 | 378 | ## | APOB Apolipoprotein B-100 precursor | LPYTIITTPPLK                              | 2 | 819.0055  | 3.404 | 0.307 |
| 44 | IPI00022229 | 1 | 34.7 | 0.84 | 0.11 | 378 | ## | APOB Apolipoprotein B-100 precursor | M[147]GLAFESTK                            | 2 | 640.3394  | 2.501 | 0.282 |
| 44 | IPI00022229 | 1 | 34.7 | 0.84 | 0.11 | 378 | ## | APOB Apolipoprotein B-100 precursor | n[145]FPEVDVLTK[272]                      | 2 | 668.3918  | 3.055 | 0.279 |
| 44 | IPI00022229 | 1 | 34.7 | 0.84 | 0.11 | 378 | ## | APOB Apolipoprotein B-100 precursor | n[145]GVISIPR                             | 2 | 443.2856  | 1.667 | 0.088 |
| 44 | IPI00022229 | 1 | 34.7 | 0.84 | 0.11 | 378 | ## | APOB Apolipoprotein B-100 precursor | n[145]IPSVQINFK[272]                      | 2 | 667.4078  | 2.767 | 0.277 |
| 44 | IPI00022229 | 1 | 34.7 | 0.84 | 0.11 | 378 | ## | APOB Apolipoprotein B-100 precursor | n[145]SLHMYANR                            | 2 | 568.2936  | 2.746 | 0.232 |
| 44 | IPI00022229 | 1 | 34.7 | 0.84 | 0.11 | 378 | ## | APOB Apolipoprotein B-100 precursor | VNDESTGKTSYR                              | 3 | 589.2954  | 3.315 | 0.378 |
| 44 | IPI00022229 | 1 | 34.7 | 0.84 | 0.11 | 378 | ## | APOB Apolipoprotein B-100 precursor | n[145]SLDEHYHIR                           | 3 | 438.5621  | 2.574 | 0.199 |
| 44 | IPI00022229 | 1 | 34.7 | 0.84 | 0.11 | 378 | ## | APOB Apolipoprotein B-100 precursor | n[145]VRESDEETQIK[272]                    | 3 | 541.2927  | 3.43  | 0.257 |
| 44 | IPI00022229 | 1 | 34.7 | 0.84 | 0.11 | 378 | ## | APOB Apolipoprotein B-100 precursor | QAEAVLK                                   | 2 | 519.819   | 2.581 | 0.242 |
| 44 | IPI00022229 | 1 | 34.7 | 0.84 | 0.11 | 378 | ## | APOB Apolipoprotein B-100 precursor | n[145]LDVTTSIGR                           | 2 | 553.3203  | 2.298 | 0.206 |

|    |             |   |      |      |      |     |    |                                     |                                  |   |          |       |       |
|----|-------------|---|------|------|------|-----|----|-------------------------------------|----------------------------------|---|----------|-------|-------|
| 44 | IPI00022229 | 1 | 34.7 | 0.84 | 0.11 | 378 | ## | APOB Apolipoprotein B-100 precursor | n[145]SLDEHYHIR                  | 2 | 657.3396 | 3.075 | 0.241 |
| 44 | IPI00022229 | 1 | 34.7 | 0.84 | 0.11 | 378 | ## | APOB Apolipoprotein B-100 precursor | n[145]SQAIATK[272]               | 2 | 503.8104 | 2.567 | 0.324 |
| 44 | IPI00022229 | 1 | 34.7 | 0.84 | 0.11 | 378 | ## | APOB Apolipoprotein B-100 precursor | n[145]LELELRPTGEIEQYSVSATYELQR   | 3 | 990.1843 | 3.154 | 0.208 |
| 44 | IPI00022229 | 1 | 34.7 | 0.84 | 0.11 | 378 | ## | APOB Apolipoprotein B-100 precursor | NIILPVYDK                        | 2 | 677.9083 | 3.256 | 0.209 |
| 44 | IPI00022229 | 1 | 34.7 | 0.84 | 0.11 | 378 | ## | APOB Apolipoprotein B-100 precursor | n[145]GNVATEISTER                | 2 | 660.8474 | 3.534 | 0.321 |
| 44 | IPI00022229 | 1 | 34.7 | 0.84 | 0.11 | 378 | ## | APOB Apolipoprotein B-100 precursor | n[145]TEVIPLIENR                 | 2 | 712.9151 | 2.503 | 0.183 |
| 44 | IPI00022229 | 1 | 34.7 | 0.84 | 0.11 | 378 | ## | APOB Apolipoprotein B-100 precursor | n[145]LTLDIQNK[272]K[272]        | 3 | 502.319  | 3.12  | 0.148 |
| 44 | IPI00022229 | 1 | 34.7 | 0.84 | 0.11 | 378 | ## | APOB Apolipoprotein B-100 precursor | KSISAALEHK                       | 2 | 752.454  | 3.108 | 0.164 |
| 44 | IPI00022229 | 1 | 34.7 | 0.84 | 0.11 | 378 | ## | APOB Apolipoprotein B-100 precursor | INPLALK                          | 2 | 524.8475 | 2.41  | 0.225 |
| 44 | IPI00022229 | 1 | 34.7 | 0.84 | 0.11 | 378 | ## | APOB Apolipoprotein B-100 precursor | LTLDIQNK                         | 2 | 612.8692 | 2.985 | 0.144 |
| 44 | IPI00022229 | 1 | 34.7 | 0.84 | 0.11 | 378 | ## | APOB Apolipoprotein B-100 precursor | n[145]QAEAVLK[272]               | 2 | 523.8261 | 2.561 | 0.223 |
| 44 | IPI00022229 | 1 | 34.7 | 0.84 | 0.11 | 378 | ## | APOB Apolipoprotein B-100 precursor | SQAIATK                          | 2 | 499.8033 | 2.591 | 0.175 |
| 44 | IPI00022229 | 1 | 34.7 | 0.84 | 0.11 | 378 | ## | APOB Apolipoprotein B-100 precursor | n[145]QTEATM[147]TFK[272]        | 2 | 680.8547 | 2.912 | 0.188 |
| 44 | IPI00022229 | 1 | 34.7 | 0.84 | 0.11 | 378 | ## | APOB Apolipoprotein B-100 precursor | EAEVFK                           | 2 | 565.8139 | 2.426 | 0.223 |
| 44 | IPI00022229 | 1 | 34.7 | 0.84 | 0.11 | 378 | ## | APOB Apolipoprotein B-100 precursor | n[145]FFGEGTK[272]               | 2 | 537.2972 | 2.293 | 0.228 |
| 44 | IPI00022229 | 1 | 34.7 | 0.84 | 0.11 | 378 | ## | APOB Apolipoprotein B-100 precursor | DLKVEDIPLAR                      | 3 | 516.9751 | 3.488 | 0.235 |
| 44 | IPI00022229 | 1 | 34.7 | 0.84 | 0.11 | 378 | ## | APOB Apolipoprotein B-100 precursor | n[145]EAEVFK[272]                | 2 | 569.821  | 2.525 | 0.219 |
| 44 | IPI00022229 | 1 | 34.7 | 0.84 | 0.11 | 378 | ## | APOB Apolipoprotein B-100 precursor | n[145]SLHM[147]YANR              | 3 | 384.5298 | 2.157 | 0.204 |
| 44 | IPI00022229 | 1 | 34.7 | 0.84 | 0.11 | 378 | ## | APOB Apolipoprotein B-100 precursor | LTISEQNIQR                       | 2 | 671.3779 | 3.166 | 0.137 |
| 44 | IPI00022229 | 1 | 34.7 | 0.84 | 0.11 | 378 | ## | APOB Apolipoprotein B-100 precursor | n[145]LTLDIQNK[272]              | 2 | 616.8763 | 2.844 | 0.178 |
| 44 | IPI00022229 | 1 | 34.7 | 0.84 | 0.11 | 378 | ## | APOB Apolipoprotein B-100 precursor | n[145]SLHM[147]YANR              | 2 | 576.2911 | 1.883 | 0.131 |
| 44 | IPI00022229 | 1 | 34.7 | 0.84 | 0.11 | 378 | ## | APOB Apolipoprotein B-100 precursor | GVISIPR                          | 2 | 441.282  | 2.482 | 0.204 |
| 44 | IPI00022229 | 1 | 34.7 | 0.84 | 0.11 | 378 | ## | APOB Apolipoprotein B-100 precursor | n[145]DK[272]IGVELTGR            | 3 | 459.2764 | 2.78  | 0.224 |
| 44 | IPI00022229 | 1 | 34.7 | 0.84 | 0.11 | 378 | ## | APOB Apolipoprotein B-100 precursor | n[145]EIFNMAR                    | 2 | 512.772  | 2.305 | 0.191 |
| 44 | IPI00022229 | 1 | 34.7 | 0.84 | 0.11 | 378 | ## | APOB Apolipoprotein B-100 precursor | n[145]EIQIYK[272]                | 2 | 541.3285 | 2.169 | 0.106 |
| 44 | IPI00022229 | 1 | 34.7 | 0.84 | 0.11 | 378 | ## | APOB Apolipoprotein B-100 precursor | n[145]QTEATMTFK[272]             | 2 | 672.8572 | 2.659 | 0.181 |
| 44 | IPI00022229 | 1 | 34.7 | 0.84 | 0.11 | 378 | ## | APOB Apolipoprotein B-100 precursor | n[145]SLWDFLK[272]               | 2 | 598.8496 | 2.609 | 0.19  |
| 44 | IPI00022229 | 1 | 34.7 | 0.84 | 0.11 | 378 | ## | APOB Apolipoprotein B-100 precursor | EVYGFNPEGK                       | 2 | 710.367  | 2.774 | 0.194 |
| 44 | IPI00022229 | 1 | 34.7 | 0.84 | 0.11 | 378 | ## | APOB Apolipoprotein B-100 precursor | VRESDEETQIK                      | 2 | 807.4283 | 3.489 | 0.347 |
| 44 | IPI00022229 | 1 | 34.7 | 0.84 | 0.11 | 378 | ## | APOB Apolipoprotein B-100 precursor | n[145]NYQLYK[272]                | 2 | 558.8183 | 2.13  | 0.218 |
| 44 | IPI00022229 | 1 | 34.7 | 0.84 | 0.11 | 378 | ## | APOB Apolipoprotein B-100 precursor | n[145]LAIEPGK[272]               | 2 | 508.3232 | 2.195 | 0.235 |
| 44 | IPI00022229 | 1 | 34.7 | 0.84 | 0.11 | 378 | ## | APOB Apolipoprotein B-100 precursor | SEILAHWSPAK                      | 3 | 506.9524 | 2.449 | 0.172 |
| 44 | IPI00022229 | 1 | 34.7 | 0.84 | 0.11 | 378 | ## | APOB Apolipoprotein B-100 precursor | n[145]ESQLPTVM[147]DFR           | 2 | 741.8726 | 2.63  | 0.182 |
| 44 | IPI00022229 | 1 | 34.7 | 0.84 | 0.11 | 378 | ## | APOB Apolipoprotein B-100 precursor | n[145]ITLPDFR                    | 2 | 503.2961 | 1.667 | 0.038 |
| 44 | IPI00022229 | 1 | 34.7 | 0.84 | 0.11 | 378 | ## | APOB Apolipoprotein B-100 precursor | n[145]EVYGFNPEGK[272]            | 2 | 714.3741 | 2.975 | 0.14  |
| 44 | IPI00022229 | 1 | 34.7 | 0.84 | 0.11 | 378 | ## | APOB Apolipoprotein B-100 precursor | n[145]HINIDQFVR                  | 2 | 643.3603 | 2.99  | 0.073 |
| 44 | IPI00022229 | 1 | 34.7 | 0.84 | 0.11 | 378 | ## | APOB Apolipoprotein B-100 precursor | n[145]NIILPVYDK[272]             | 2 | 681.9154 | 2.35  | 0.181 |
| 44 | IPI00022229 | 1 | 34.7 | 0.84 | 0.11 | 378 | ## | APOB Apolipoprotein B-100 precursor | EIQIYK                           | 2 | 537.3214 | 1.998 | 0.122 |
| 44 | IPI00022229 | 1 | 34.7 | 0.84 | 0.11 | 378 | ## | APOB Apolipoprotein B-100 precursor | FFGEGTK                          | 2 | 533.2901 | 2.14  | 0.191 |
| 44 | IPI00022229 | 1 | 34.7 | 0.84 | 0.11 | 378 | ## | APOB Apolipoprotein B-100 precursor | LIDVISM[147]YR                   | 2 | 633.3498 | 1.726 | 0.141 |
| 44 | IPI00022229 | 1 | 34.7 | 0.84 | 0.11 | 378 | ## | APOB Apolipoprotein B-100 precursor | QTEATM[147]TFK                   | 2 | 676.8476 | 2.194 | 0.205 |
| 44 | IPI00022229 | 1 | 34.7 | 0.84 | 0.11 | 378 | ## | APOB Apolipoprotein B-100 precursor | SLDEHYHIR                        | 4 | 328.1717 | 1.6   | 0.111 |
| 44 | IPI00022229 | 1 | 34.7 | 0.84 | 0.11 | 378 | ## | APOB Apolipoprotein B-100 precursor | LAIEPGK                          | 2 | 504.3161 | 2.626 | 0.1   |
| 44 | IPI00022229 | 1 | 34.7 | 0.84 | 0.11 | 378 | ## | APOB Apolipoprotein B-100 precursor | n[145]IEDGTLASK[272]             | 2 | 611.3501 | 2.485 | 0.176 |
| 44 | IPI00022229 | 1 | 34.7 | 0.84 | 0.11 | 378 | ## | APOB Apolipoprotein B-100 precursor | n[145]VK[272]YTLNK[272]NSLK[272] | 3 | 628.7304 | 2.569 | 0.26  |
| 44 | IPI00022229 | 1 | 34.7 | 0.84 | 0.11 | 378 | ## | APOB Apolipoprotein B-100 precursor | n[145]ALVEQGFTVPEIK[272]         | 2 | 860.0002 | 2.643 | 0.2   |
| 44 | IPI00022229 | 1 | 34.7 | 0.84 | 0.11 | 378 | ## | APOB Apolipoprotein B-100 precursor | n[145]SVGFHLPSPR                 | 2 | 572.3232 | 2.882 | 0.24  |
| 44 | IPI00022229 | 1 | 34.7 | 0.84 | 0.11 | 378 | ## | APOB Apolipoprotein B-100 precursor | n[145]SVGFHLPSPR                 | 3 | 381.8846 | 2.716 | 0.171 |



|    |             |   |      |      |      |     |    |                                     |                               |   |           |       |       |
|----|-------------|---|------|------|------|-----|----|-------------------------------------|-------------------------------|---|-----------|-------|-------|
| 44 | IPI00022229 | 1 | 34.7 | 0.84 | 0.11 | 378 | ## | APOB Apolipoprotein B-100 precursor | VKYTLNK                       | 2 | 643.4032  | 3.081 | 0.258 |
| 44 | IPI00022229 | 1 | 34.7 | 0.84 | 0.11 | 378 | ## | APOB Apolipoprotein B-100 precursor | n[145]NIFNFK[272]             | 2 | 535.8155  | 2.25  | 0.13  |
| 44 | IPI00022229 | 1 | 34.7 | 0.84 | 0.11 | 378 | ## | APOB Apolipoprotein B-100 precursor | YTLNKNSLK                     | 2 | 750.9485  | 3.11  | 0.3   |
| 44 | IPI00022229 | 1 | 34.7 | 0.84 | 0.11 | 378 | ## | APOB Apolipoprotein B-100 precursor | ITLPDFR                       | 2 | 501.2926  | 1.912 | 0.165 |
| 44 | IPI00022229 | 1 | 34.7 | 0.84 | 0.11 | 378 | ## | APOB Apolipoprotein B-100 precursor | n[145]DLGQCDR                 | 2 | 498.7216  | 2.179 | 0.167 |
| 44 | IPI00022229 | 1 | 34.7 | 0.84 | 0.11 | 378 | ## | APOB Apolipoprotein B-100 precursor | n[145]VRESDEETQIK[272]        | 2 | 811.4354  | 2.682 | 0.341 |
| 44 | IPI00022229 | 1 | 34.7 | 0.84 | 0.11 | 378 | ## | APOB Apolipoprotein B-100 precursor | n[145]SLDEHYHIR               | 4 | 329.1734  | 1.961 | 0.073 |
| 44 | IPI00022229 | 1 | 34.7 | 0.84 | 0.11 | 378 | ## | APOB Apolipoprotein B-100 precursor | n[145]ENFAGEATLQR             | 2 | 690.3554  | 2.62  | 0.124 |
| 44 | IPI00022229 | 1 | 34.7 | 0.84 | 0.11 | 378 | ## | APOB Apolipoprotein B-100 precursor | YTLNKNSLK                     | 3 | 500.9681  | 2.071 | 0.232 |
| 44 | IPI00022229 | 1 | 34.7 | 0.84 | 0.11 | 378 | ## | APOB Apolipoprotein B-100 precursor | n[145]IEIPLPFGGK[272]         | 2 | 679.918   | 2.433 | 0.151 |
| 44 | IPI00022229 | 1 | 34.7 | 0.84 | 0.11 | 378 | ## | APOB Apolipoprotein B-100 precursor | n[145]LIDVISM[147]YR          | 2 | 635.3533  | 2.701 | 0.108 |
| 44 | IPI00022229 | 1 | 34.7 | 0.84 | 0.11 | 378 | ## | APOB Apolipoprotein B-100 precursor | n[145]EK[272]LTALTK[272]      | 3 | 445.9573  | 2.738 | 0.138 |
| 44 | IPI00022229 | 1 | 34.7 | 0.84 | 0.11 | 378 | ## | APOB Apolipoprotein B-100 precursor | n[145]QIDDIDVR                | 2 | 559.3021  | 2.638 | 0.056 |
| 44 | IPI00022229 | 1 | 34.7 | 0.84 | 0.11 | 378 | ## | APOB Apolipoprotein B-100 precursor | n[145]FLDSNIK[272]            | 2 | 562.8314  | 2.194 | 0.11  |
| 44 | IPI00022229 | 1 | 34.7 | 0.84 | 0.11 | 378 | ## | APOB Apolipoprotein B-100 precursor | TIHDLHLFIENIDFNK              | 3 | 750.4074  | 3.313 | 0.059 |
| 44 | IPI00022229 | 1 | 34.7 | 0.84 | 0.11 | 378 | ## | APOB Apolipoprotein B-100 precursor | FPEVDVLTk                     | 2 | 664.3847  | 1.392 | 0.111 |
| 44 | IPI00022229 | 1 | 34.7 | 0.84 | 0.11 | 378 | ## | APOB Apolipoprotein B-100 precursor | n[145]SQAIATK[272]K[272]      | 2 | 639.909   | 1.943 | 0.122 |
| 44 | IPI00022229 | 1 | 34.7 | 0.84 | 0.11 | 378 | ## | APOB Apolipoprotein B-100 precursor | n[145]VK[272]YTLNK[272]       | 2 | 649.4139  | 2.775 | 0.229 |
| 44 | IPI00022229 | 1 | 34.7 | 0.84 | 0.11 | 378 | ## | APOB Apolipoprotein B-100 precursor | LKETIQK                       | 3 | 427.2748  | 2.6   | 0.142 |
| 44 | IPI00022229 | 1 | 34.7 | 0.84 | 0.11 | 378 | ## | APOB Apolipoprotein B-100 precursor | n[145]TLQELK[272]K[272]       | 2 | 646.4192  | 2.349 | 0.01  |
| 44 | IPI00022229 | 1 | 34.7 | 0.84 | 0.11 | 378 | ## | APOB Apolipoprotein B-100 precursor | VKYTLNKNSLK                   | 3 | 623.3876  | 2.154 | 0.235 |
| 44 | IPI00022229 | 1 | 34.7 | 0.84 | 0.11 | 378 | ## | APOB Apolipoprotein B-100 precursor | AIVDTLK                       | 2 | 520.3292  | 2.299 | 0.231 |
| 44 | IPI00022229 | 1 | 34.7 | 0.84 | 0.11 | 378 | ## | APOB Apolipoprotein B-100 precursor | n[145]SK[272]EVPEAR           | 3 | 401.9027  | 2.821 | 0.112 |
| 44 | IPI00022229 | 1 | 34.7 | 0.84 | 0.11 | 378 | ## | APOB Apolipoprotein B-100 precursor | DLGQCDR                       | 2 | 496.7181  | 1.967 | 0.133 |
| 44 | IPI00022229 | 1 | 34.7 | 0.84 | 0.11 | 378 | ## | APOB Apolipoprotein B-100 precursor | SQAIATKK                      | 3 | 422.9346  | 2.069 | 0.124 |
| 44 | IPI00022229 | 1 | 34.7 | 0.84 | 0.11 | 378 | ## | APOB Apolipoprotein B-100 precursor | ITLPDFR                       | 1 | 1001.5779 | 1.712 | 0.061 |
| 44 | IPI00022229 | 1 | 34.7 | 0.84 | 0.11 | 378 | ## | APOB Apolipoprotein B-100 precursor | LLLM[147]GAR                  | 2 | 465.2837  | 2.395 | 0.012 |
| 44 | IPI00022229 | 1 | 34.7 | 0.84 | 0.11 | 378 | ## | APOB Apolipoprotein B-100 precursor | n[145]LIDVISMYR               | 2 | 627.3559  | 2.424 | 0.039 |
| 44 | IPI00022229 | 1 | 34.7 | 0.84 | 0.11 | 378 | ## | APOB Apolipoprotein B-100 precursor | FSHVEK                        | 2 | 513.7902  | 1.938 | 0.072 |
| 44 | IPI00022229 | 1 | 34.7 | 0.84 | 0.11 | 378 | ## | APOB Apolipoprotein B-100 precursor | NYQLYK                        | 2 | 554.8112  | 1.753 | 0.125 |
| 44 | IPI00022229 | 1 | 34.7 | 0.84 | 0.11 | 378 | ## | APOB Apolipoprotein B-100 precursor | IEGNLIFDPNNYLPK               | 2 | 1014.0517 | 2.112 | 0.102 |
| 44 | IPI00022229 | 1 | 34.7 | 0.84 | 0.11 | 378 | ## | APOB Apolipoprotein B-100 precursor | n[145]TLADLTLLDSPIK[272]      | 2 | 844.5079  | 2.719 | 0.196 |
| 44 | IPI00022229 | 1 | 34.7 | 0.84 | 0.11 | 378 | ## | APOB Apolipoprotein B-100 precursor | n[145]LEDTPK[272]             | 2 | 495.7892  | 2.092 | 0.064 |
| 44 | IPI00022229 | 1 | 34.7 | 0.84 | 0.11 | 378 | ## | APOB Apolipoprotein B-100 precursor | TEVIPLIENR                    | 2 | 710.9116  | 2.12  | 0.122 |
| 44 | IPI00022229 | 1 | 34.7 | 0.84 | 0.11 | 378 | ## | APOB Apolipoprotein B-100 precursor | LAPGELTIIL                    | 1 | 1179.7348 | 1.531 | 0.161 |
| 44 | IPI00022229 | 1 | 34.7 | 0.84 | 0.11 | 378 | ## | APOB Apolipoprotein B-100 precursor | SLHM[147]YANR                 | 3 | 383.1941  | 1.96  | 0.113 |
| 44 | IPI00022229 | 1 | 34.7 | 0.84 | 0.11 | 378 | ## | APOB Apolipoprotein B-100 precursor | n[145]SK[272]EVPEAR           | 2 | 602.3504  | 2.183 | 0.282 |
| 44 | IPI00022229 | 1 | 34.7 | 0.84 | 0.11 | 378 | ## | APOB Apolipoprotein B-100 precursor | LVTELRL                       | 2 | 435.774   | 2.059 | 0.15  |
| 44 | IPI00022229 | 1 | 34.7 | 0.84 | 0.11 | 378 | ## | APOB Apolipoprotein B-100 precursor | SPSQADINK                     | 2 | 620.3383  | 3.167 | 0.238 |
| 44 | IPI00022229 | 1 | 34.7 | 0.84 | 0.11 | 378 | ## | APOB Apolipoprotein B-100 precursor | n[145]MLETVR                  | 2 | 446.7558  | 1.961 | 0.008 |
| 44 | IPI00022229 | 1 | 34.7 | 0.84 | 0.11 | 378 | ## | APOB Apolipoprotein B-100 precursor | n[145]IHSGSFQSQVELSNDQEK[272] | 3 | 774.3919  | 2.102 | 0.124 |
| 44 | IPI00022229 | 1 | 34.7 | 0.84 | 0.11 | 378 | ## | APOB Apolipoprotein B-100 precursor | n[145]EEEMLENVSLVCPK[272]     | 2 | 977.4823  | 4.208 | 0.351 |
| 44 | IPI00022229 | 1 | 34.7 | 0.84 | 0.11 | 378 | ## | APOB Apolipoprotein B-100 precursor | IPSVQINFK                     | 2 | 663.4007  | 2.077 | 0.056 |
| 44 | IPI00022229 | 1 | 34.7 | 0.84 | 0.11 | 378 | ## | APOB Apolipoprotein B-100 precursor | n[145]DK[272]IGVELTGR         | 2 | 688.411   | 2.773 | 0.156 |
| 44 | IPI00022229 | 1 | 34.7 | 0.84 | 0.11 | 378 | ## | APOB Apolipoprotein B-100 precursor | VNDESTEGKTSYR                 | 2 | 883.4394  | 2.87  | 0.405 |
| 44 | IPI00022229 | 1 | 34.7 | 0.84 | 0.11 | 378 | ## | APOB Apolipoprotein B-100 precursor | n[145]IPSVQINFK[272]DLK[272]  | 3 | 612.0436  | 2.639 | 0.124 |
| 44 | IPI00022229 | 1 | 34.7 | 0.84 | 0.11 | 378 | ## | APOB Apolipoprotein B-100 precursor | n[145]VNDESTEGK[272]TSYR      | 3 | 591.9668  | 2.299 | 0.155 |
| 44 | IPI00022229 | 1 | 34.7 | 0.84 | 0.11 | 378 | ## | APOB Apolipoprotein B-100 precursor | CVQSTKPSLM[147]IQK            | 3 | 649.0193  | 2.691 | 0.076 |

|    |             |   |      |      |      |     |     |                                     |                                    |   |          |       |       |
|----|-------------|---|------|------|------|-----|-----|-------------------------------------|------------------------------------|---|----------|-------|-------|
| 44 | IPI00022229 | 1 | 34.7 | 0.84 | 0.11 | 378 | ### | APOB Apolipoprotein B-100 precursor | n[145]LLLML[147]GAR                | 2 | 467.2872 | 1.734 | 0.046 |
| 44 | IPI00022229 | 1 | 34.7 | 0.84 | 0.11 | 378 | ### | APOB Apolipoprotein B-100 precursor | n[145]TSQCTLK                      | 2 | 555.792  | 1.863 | 0.032 |
| 44 | IPI00022229 | 1 | 34.7 | 0.84 | 0.11 | 378 | ### | APOB Apolipoprotein B-100 precursor | LAAYLM[147]LM[147]R                | 2 | 627.3409 | 1.722 | 0.048 |
| 44 | IPI00022229 | 1 | 34.7 | 0.84 | 0.11 | 378 | ### | APOB Apolipoprotein B-100 precursor | n[145]IEIPLPFGGK[272]              | 3 | 453.6144 | 1.632 | 0.149 |
| 44 | IPI00022229 | 1 | 34.7 | 0.84 | 0.11 | 378 | ### | APOB Apolipoprotein B-100 precursor | DDKHEQDM[147]VNGIM[147]LSVEK       | 3 | 847.421  | 2.89  | 0.106 |
| 44 | IPI00022229 | 1 | 34.7 | 0.84 | 0.11 | 378 | ### | APOB Apolipoprotein B-100 precursor | n[145]ALYVWNGQVPDGVSK[272]         | 3 | 641.0189 | 3.123 | 0.043 |
| 44 | IPI00022229 | 1 | 34.7 | 0.84 | 0.11 | 378 | ### | APOB Apolipoprotein B-100 precursor | n[145]YTLNK[272]NSLK[272]          | 2 | 756.9592 | 2.231 | 0.194 |
| 44 | IPI00022229 | 1 | 34.7 | 0.84 | 0.11 | 378 | ### | APOB Apolipoprotein B-100 precursor | n[145]INFNEK[272]                  | 2 | 526.8026 | 1.632 | 0.07  |
| 44 | IPI00022229 | 1 | 34.7 | 0.84 | 0.11 | 378 | ### | APOB Apolipoprotein B-100 precursor | NIFNFK                             | 2 | 531.8084 | 1.615 | 0.029 |
| 44 | IPI00022229 | 1 | 34.7 | 0.84 | 0.11 | 378 | ### | APOB Apolipoprotein B-100 precursor | VLADK                              | 2 | 413.2633 | 1.802 | 0.059 |
| 44 | IPI00022229 | 1 | 34.7 | 0.84 | 0.11 | 378 | ### | APOB Apolipoprotein B-100 precursor | EEEMLENVSLVCPK                     | 2 | 973.4752 | 3.33  | 0.434 |
| 44 | IPI00022229 | 1 | 34.7 | 0.84 | 0.11 | 378 | ### | APOB Apolipoprotein B-100 precursor | n[145]TNFFHESGLEAHVALK[272]        | 4 | 522.7834 | 3.056 | 0.228 |
| 44 | IPI00022229 | 1 | 34.7 | 0.84 | 0.11 | 378 | ### | APOB Apolipoprotein B-100 precursor | HIPSFTIDFVEM[147]K                 | 3 | 620.6623 | 3.107 | 0.197 |
| 44 | IPI00022229 | 1 | 34.7 | 0.84 | 0.11 | 378 | ### | APOB Apolipoprotein B-100 precursor | n[145]ATLYALSH                     | 2 | 510.2858 | 2.74  | 0.27  |
| 44 | IPI00022229 | 1 | 34.7 | 0.84 | 0.11 | 378 | ### | APOB Apolipoprotein B-100 precursor | n[145]DLK[272]VEDIPLAR             | 2 | 778.9662 | 2.601 | 0.245 |
| 44 | IPI00022229 | 1 | 34.7 | 0.84 | 0.11 | 378 | ### | APOB Apolipoprotein B-100 precursor | ATLYALSH                           | 2 | 508.2822 | 3.065 | 0.218 |
| 44 | IPI00022229 | 1 | 34.7 | 0.84 | 0.11 | 378 | ### | APOB Apolipoprotein B-100 precursor | FFGEGTKK                           | 3 | 445.2591 | 1.762 | 0.109 |
| 44 | IPI00022229 | 1 | 34.7 | 0.84 | 0.11 | 378 | ### | APOB Apolipoprotein B-100 precursor | n[145]EVDVLTk[272]                 | 2 | 546.3312 | 2.839 | 0.233 |
| 44 | IPI00022229 | 1 | 34.7 | 0.84 | 0.11 | 378 | ### | APOB Apolipoprotein B-100 precursor | SKEVPEAR                           | 2 | 598.3433 | 1.844 | 0.155 |
| 44 | IPI00022229 | 1 | 34.7 | 0.84 | 0.11 | 378 | ### | APOB Apolipoprotein B-100 precursor | NSLKIEIPLPFGGK                     | 3 | 645.0593 | 2.821 | 0.125 |
| 44 | IPI00022229 | 1 | 34.7 | 0.84 | 0.11 | 378 | ### | APOB Apolipoprotein B-100 precursor | SKEVPEAR                           | 3 | 399.2313 | 2.434 | 0.047 |
| 44 | IPI00022229 | 1 | 34.7 | 0.84 | 0.11 | 378 | ### | APOB Apolipoprotein B-100 precursor | n[145]SLHMYANR                     | 3 | 379.1981 | 1.516 | 0.095 |
| 44 | IPI00022229 | 1 | 34.7 | 0.84 | 0.11 | 378 | ### | APOB Apolipoprotein B-100 precursor | n[145]EEEM[147]LENVSLVCPK[272]     | 2 | 985.4798 | 3.986 | 0.414 |
| 44 | IPI00022229 | 1 | 34.7 | 0.84 | 0.11 | 378 | ### | APOB Apolipoprotein B-100 precursor | AFTDLHLR                           | 2 | 556.8142 | 3.113 | 0.121 |
| 44 | IPI00022229 | 1 | 34.7 | 0.84 | 0.11 | 378 | ### | APOB Apolipoprotein B-100 precursor | n[145]AYLM[147]LM[147]R            | 2 | 537.2838 | 2.319 | 0.279 |
| 44 | IPI00022229 | 1 | 34.7 | 0.84 | 0.11 | 378 | ### | APOB Apolipoprotein B-100 precursor | n[145]AFTDLHLR                     | 2 | 558.8178 | 3.265 | 0.083 |
| 44 | IPI00022229 | 1 | 34.7 | 0.84 | 0.11 | 378 | ### | APOB Apolipoprotein B-100 precursor | DKIGVELTGR                         | 3 | 456.605  | 2.268 | 0.076 |
| 44 | IPI00022229 | 1 | 34.7 | 0.84 | 0.11 | 378 | ### | APOB Apolipoprotein B-100 precursor | EVDVLTk                            | 2 | 542.3241 | 2.389 | 0.233 |
| 44 | IPI00022229 | 1 | 34.7 | 0.84 | 0.11 | 378 | ### | APOB Apolipoprotein B-100 precursor | n[145]DNVFDGLVR                    | 2 | 589.818  | 1.418 | 0.054 |
| 44 | IPI00022229 | 1 | 34.7 | 0.84 | 0.11 | 378 | ### | APOB Apolipoprotein B-100 precursor | EEEM[147]LENVSLVCPK                | 2 | 981.4727 | 2.402 | 0.241 |
| 44 | IPI00022229 | 1 | 34.7 | 0.84 | 0.11 | 378 | ### | APOB Apolipoprotein B-100 precursor | n[145]DLK[272]VEDIPLAR             | 3 | 519.6465 | 2.16  | 0.08  |
| 44 | IPI00022229 | 1 | 34.7 | 0.84 | 0.11 | 378 | ### | APOB Apolipoprotein B-100 precursor | n[145]LK[272]ETIQK[272]            | 3 | 431.2819 | 2.051 | 0.044 |
| 44 | IPI00022229 | 1 | 34.7 | 0.84 | 0.11 | 378 | ### | APOB Apolipoprotein B-100 precursor | n[145]ETLEDTRDR                    | 3 | 426.8851 | 2.033 | 0.13  |
| 44 | IPI00022229 | 1 | 34.7 | 0.84 | 0.11 | 378 | ### | APOB Apolipoprotein B-100 precursor | SVSLPSLDPASAK                      | 3 | 517.9629 | 2.004 | 0.003 |
| 44 | IPI00022229 | 1 | 34.7 | 0.84 | 0.11 | 378 | ### | APOB Apolipoprotein B-100 precursor | IPSVQINFKDLK                       | 3 | 608.0365 | 1.902 | 0.096 |
| 44 | IPI00022229 | 1 | 34.7 | 0.84 | 0.11 | 378 | ### | APOB Apolipoprotein B-100 precursor | n[145]QVFLYPEK[272]DEPTYILNIK[272] | 4 | 661.3756 | 2.866 | 0.043 |
| 44 | IPI00022229 | 1 | 34.7 | 0.84 | 0.11 | 378 | ### | APOB Apolipoprotein B-100 precursor | n[145]AVSM[147]PSFSILGSDVR         | 3 | 575.9702 | 1.823 | 0.077 |
| 44 | IPI00022229 | 1 | 34.7 | 0.84 | 0.11 | 378 | ### | APOB Apolipoprotein B-100 precursor | n[145]SQADINK[272]                 | 2 | 532.303  | 1.904 | 0.19  |
| 44 | IPI00022229 | 1 | 34.7 | 0.84 | 0.11 | 378 | ### | APOB Apolipoprotein B-100 precursor | TKNSEEFAAAMSR                      | 3 | 574.6262 | 2.263 | 0.018 |
| 44 | IPI00022229 | 1 | 34.7 | 0.84 | 0.11 | 378 | ### | APOB Apolipoprotein B-100 precursor | n[145]LK[272]QHIEAIDVR             | 3 | 537.3258 | 1.894 | 0.041 |
| 44 | IPI00022229 | 1 | 34.7 | 0.84 | 0.11 | 378 | ### | APOB Apolipoprotein B-100 precursor | AYLM[147]LM[147]R                  | 2 | 535.2803 | 2.007 | 0.139 |
| 44 | IPI00022229 | 1 | 34.7 | 0.84 | 0.11 | 378 | ### | APOB Apolipoprotein B-100 precursor | n[145]AFTDLHLR                     | 3 | 372.8809 | 2.445 | 0.08  |
| 44 | IPI00022229 | 1 | 34.7 | 0.84 | 0.11 | 378 | ### | APOB Apolipoprotein B-100 precursor | n[145]NFVASHIAN                    | 2 | 558.7996 | 2.175 | 0.234 |
| 44 | IPI00022229 | 1 | 34.7 | 0.84 | 0.11 | 378 | ### | APOB Apolipoprotein B-100 precursor | n[145]QQANDYLNSFNWER               | 2 | 964.954  | 4.36  | 0.322 |
| 44 | IPI00022229 | 1 | 34.7 | 0.84 | 0.11 | 378 | ### | APOB Apolipoprotein B-100 precursor | n[145]PGIYTR                       | 2 | 425.7488 | 1.958 | 0.019 |
| 44 | IPI00022229 | 1 | 34.7 | 0.84 | 0.11 | 378 | ### | APOB Apolipoprotein B-100 precursor | EM[147]K                           | 1 | 703.3808 | 1.121 | 0.072 |
| 44 | IPI00022229 | 1 | 34.7 | 0.84 | 0.11 | 378 | ### | APOB Apolipoprotein B-100 precursor | LKETIQK[272]LSNVLQQVK              | 3 | 811.8395 | 1.313 | 0.13  |
| 44 | IPI00022229 | 1 | 34.7 | 0.84 | 0.11 | 378 | ### | APOB Apolipoprotein B-100 precursor | AFTDLHLR                           | 3 | 371.5452 | 2.238 | 0.035 |

|    |             |   |      |      |      |     |    |                                           |                                       |   |           |       |       |
|----|-------------|---|------|------|------|-----|----|-------------------------------------------|---------------------------------------|---|-----------|-------|-------|
| 44 | IPI00022229 | 1 | 34.7 | 0.84 | 0.11 | 378 | ## | APOB Apolipoprotein B-100 precursor       | n[145]LLSGGNTLH                       | 2 | 528.3019  | 2.099 | 0.025 |
| 44 | IPI00022229 | 1 | 34.7 | 0.84 | 0.11 | 378 | ## | APOB Apolipoprotein B-100 precursor       | n[145]LAPGELTIIIL                     | 1 | 1183.7419 | 1.374 | 0.103 |
| 44 | IPI00022229 | 1 | 34.7 | 0.84 | 0.11 | 378 | ## | APOB Apolipoprotein B-100 precursor       | n[145]HIPSFTIDFVEM[147]JK[272]        | 3 | 623.3337  | 2.665 | 0.027 |
| 44 | IPI00022229 | 1 | 34.7 | 0.84 | 0.11 | 378 | ## | APOB Apolipoprotein B-100 precursor       | n[145]ETLEDTRDR                       | 2 | 639.824   | 2.049 | 0.025 |
| 44 | IPI00022229 | 1 | 34.7 | 0.84 | 0.11 | 378 | ## | APOB Apolipoprotein B-100 precursor       | n[145]VLVDHFG                         | 2 | 465.7619  | 1.4   | 0.109 |
| 44 | IPI00022229 | 1 | 34.7 | 0.84 | 0.11 | 378 | ## | APOB Apolipoprotein B-100 precursor       | n[145]YFEK[272]                       | 2 | 437.7493  | 1.194 | 0.17  |
| 44 | IPI00022229 | 1 | 34.7 | 0.84 | 0.11 | 378 | ## | APOB Apolipoprotein B-100 precursor       | SK[272]K[272]                         | 2 | 395.7731  | 0.913 | 0.136 |
| 44 | IPI00022229 | 1 | 34.7 | 0.84 | 0.11 | 378 | ## | APOB Apolipoprotein B-100 precursor       | SVAK                                  | 2 | 342.7238  | 0.841 | 0.121 |
| 44 | IPI00022229 | 1 | 34.7 | 0.84 | 0.11 | 378 | ## | APOB Apolipoprotein B-100 precursor       | SVK[272]                              | 1 | 617.4104  | 0.88  | 0.378 |
| 44 | IPI00022229 | 1 | 34.7 | 0.84 | 0.11 | 378 | ## | APOB Apolipoprotein B-100 precursor       | n[145]DFLK[272]                       | 1 | 810.4964  | 1.211 | 0.02  |
| 45 | IPI00022371 | 1 | 42.1 | 0.89 | 0.17 | 105 | 55 | HRG Histidine-rich glycoprotein precursor | ADLFYDVEALDLESPK                      | 2 | 1053.0437 | 3.977 | 0.497 |
| 45 | IPI00022371 | 1 | 42.1 | 0.89 | 0.17 | 105 | 55 | HRG Histidine-rich glycoprotein precursor | GGEGTGYFVDFSVR                        | 2 | 815.8967  | 3.978 | 0.488 |
| 45 | IPI00022371 | 1 | 42.1 | 0.89 | 0.17 | 105 | 55 | HRG Histidine-rich glycoprotein precursor | RPSEIVIGQCK                           | 2 | 778.426   | 4.109 | 0.479 |
| 45 | IPI00022371 | 1 | 42.1 | 0.89 | 0.17 | 105 | 55 | HRG Histidine-rich glycoprotein precursor | YKEENDDFASFR                          | 2 | 900.9312  | 4.683 | 0.478 |
| 45 | IPI00022371 | 1 | 42.1 | 0.89 | 0.17 | 105 | 55 | HRG Histidine-rich glycoprotein precursor | n[145]VSPTDCSAVEPEAEK[272]            | 2 | 948.4521  | 4.871 | 0.558 |
| 45 | IPI00022371 | 1 | 42.1 | 0.89 | 0.17 | 105 | 55 | HRG Histidine-rich glycoprotein precursor | n[145]YK[272]EENDDFASFR               | 2 | 904.9383  | 4.256 | 0.41  |
| 45 | IPI00022371 | 1 | 42.1 | 0.89 | 0.17 | 105 | 55 | HRG Histidine-rich glycoprotein precursor | DHHHPKPEHEGPPPPDER                    | 3 | 877.4339  | 2.98  | 0.362 |
| 45 | IPI00022371 | 1 | 42.1 | 0.89 | 0.17 | 105 | 55 | HRG Histidine-rich glycoprotein precursor | GEVLPLPEANFSPFLPHHK                   | 3 | 836.125   | 5.369 | 0.572 |
| 45 | IPI00022371 | 1 | 42.1 | 0.89 | 0.17 | 105 | 55 | HRG Histidine-rich glycoprotein precursor | HPLKPDNQPFPQSVSESCPGK                 | 3 | 920.1317  | 6.47  | 0.553 |
| 45 | IPI00022371 | 1 | 42.1 | 0.89 | 0.17 | 105 | 55 | HRG Histidine-rich glycoprotein precursor | KGEVLPLPEANFSPFLPH                    | 3 | 790.4387  | 3.98  | 0.384 |
| 45 | IPI00022371 | 1 | 42.1 | 0.89 | 0.17 | 105 | 55 | HRG Histidine-rich glycoprotein precursor | SSTTKPPFKPHGSR                        | 3 | 649.7023  | 2.494 | 0.09  |
| 45 | IPI00022371 | 1 | 42.1 | 0.89 | 0.17 | 105 | 55 | HRG Histidine-rich glycoprotein precursor | n[145]DHHHPK[272]PHEHGPPPPDER         | 3 | 880.1053  | 4.218 | 0.51  |
| 45 | IPI00022371 | 1 | 42.1 | 0.89 | 0.17 | 105 | 55 | HRG Histidine-rich glycoprotein precursor | n[145]GEVLPLPEANFSPFLPHHK[272]        | 3 | 838.7964  | 4.035 | 0.499 |
| 45 | IPI00022371 | 1 | 42.1 | 0.89 | 0.17 | 105 | 55 | HRG Histidine-rich glycoprotein precursor | n[145]HPLK[272]PDNQPFPQSVSESCPGK[272] | 3 | 924.1388  | 5.605 | 0.497 |
| 45 | IPI00022371 | 1 | 42.1 | 0.89 | 0.17 | 105 | 55 | HRG Histidine-rich glycoprotein precursor | n[145]YK[272]EENDDFASFR               | 3 | 603.628   | 4.033 | 0.478 |
| 45 | IPI00022371 | 1 | 42.1 | 0.89 | 0.17 | 105 | 55 | HRG Histidine-rich glycoprotein precursor | DHHHPKPEHEGPPPPDER                    | 4 | 658.3273  | 3.96  | 0.429 |
| 45 | IPI00022371 | 1 | 42.1 | 0.89 | 0.17 | 105 | 55 | HRG Histidine-rich glycoprotein precursor | GEVLPLPEANFSPFLPHHK                   | 4 | 627.3456  | 3.088 | 0.395 |
| 45 | IPI00022371 | 1 | 42.1 | 0.89 | 0.17 | 105 | 55 | HRG Histidine-rich glycoprotein precursor | KGEVLPLPEANFSPFLPHHK                  | 4 | 694.3931  | 3.275 | 0.45  |
| 45 | IPI00022371 | 1 | 42.1 | 0.89 | 0.17 | 105 | 55 | HRG Histidine-rich glycoprotein precursor | n[145]GEVLPLPEANFSPFLPHHK[272]        | 4 | 629.3492  | 2.738 | 0.134 |
| 45 | IPI00022371 | 1 | 42.1 | 0.89 | 0.17 | 105 | 55 | HRG Histidine-rich glycoprotein precursor | n[145]RPSEIVIGQCK[272]                | 2 | 782.4331  | 3.662 | 0.416 |
| 45 | IPI00022371 | 1 | 42.1 | 0.89 | 0.17 | 105 | 55 | HRG Histidine-rich glycoprotein precursor | RDGYLFQLLR                            | 3 | 474.2735  | 4.517 | 0.204 |
| 45 | IPI00022371 | 1 | 42.1 | 0.89 | 0.17 | 105 | 55 | HRG Histidine-rich glycoprotein precursor | n[145]RPSEIVIGQCK[272]                | 3 | 521.9578  | 3.738 | 0.225 |
| 45 | IPI00022371 | 1 | 42.1 | 0.89 | 0.17 | 105 | 55 | HRG Histidine-rich glycoprotein precursor | n[145]DHHHPK[272]PHEHGPPPPDER         | 4 | 660.3308  | 3.369 | 0.31  |
| 45 | IPI00022371 | 1 | 42.1 | 0.89 | 0.17 | 105 | 55 | HRG Histidine-rich glycoprotein precursor | n[145]HPLK[272]PDNQPFPQSVSESCPGK[272] | 4 | 693.3559  | 2.11  | 0.086 |
| 45 | IPI00022371 | 1 | 42.1 | 0.89 | 0.17 | 105 | 55 | HRG Histidine-rich glycoprotein precursor | n[145]SSTTK[272]PPFK[272]PHGSR        | 4 | 490.5339  | 2.544 | 0.253 |
| 45 | IPI00022371 | 1 | 42.1 | 0.89 | 0.17 | 105 | 55 | HRG Histidine-rich glycoprotein precursor | DGYLFQLLR                             | 2 | 632.8561  | 3.328 | 0.356 |
| 45 | IPI00022371 | 1 | 42.1 | 0.89 | 0.17 | 105 | 55 | HRG Histidine-rich glycoprotein precursor | n[145]IADAHLDR                        | 2 | 527.7917  | 2.975 | 0.396 |
| 45 | IPI00022371 | 1 | 42.1 | 0.89 | 0.17 | 105 | 55 | HRG Histidine-rich glycoprotein precursor | n[145]ADLFYDVEALDLESPK[272]           | 2 | 1057.0508 | 3.627 | 0.316 |
| 45 | IPI00022371 | 1 | 42.1 | 0.89 | 0.17 | 105 | 55 | HRG Histidine-rich glycoprotein precursor | YKEENDDFASFR                          | 3 | 600.9566  | 3.187 | 0.271 |
| 45 | IPI00022371 | 1 | 42.1 | 0.89 | 0.17 | 105 | 55 | HRG Histidine-rich glycoprotein precursor | n[145]RDGYLFQLLR                      | 3 | 475.6092  | 3.385 | 0.154 |
| 45 | IPI00022371 | 1 | 42.1 | 0.89 | 0.17 | 105 | 55 | HRG Histidine-rich glycoprotein precursor | n[145]DGYLFQLLR                       | 2 | 634.8596  | 2.841 | 0.304 |
| 45 | IPI00022371 | 1 | 42.1 | 0.89 | 0.17 | 105 | 55 | HRG Histidine-rich glycoprotein precursor | QIGSVYR                               | 2 | 481.7746  | 2.695 | 0.249 |
| 45 | IPI00022371 | 1 | 42.1 | 0.89 | 0.17 | 105 | 55 | HRG Histidine-rich glycoprotein precursor | DHHHPKPEHEGPPPPDER                    | 5 | 526.8633  | 2.002 | 0.05  |
| 45 | IPI00022371 | 1 | 42.1 | 0.89 | 0.17 | 105 | 55 | HRG Histidine-rich glycoprotein precursor | SSTTKPPFKPHGSR                        | 4 | 487.5286  | 2.443 | 0.12  |
| 45 | IPI00022371 | 1 | 42.1 | 0.89 | 0.17 | 105 | 55 | HRG Histidine-rich glycoprotein precursor | IADAHLDR                              | 2 | 525.7882  | 2.795 | 0.202 |
| 45 | IPI00022371 | 1 | 42.1 | 0.89 | 0.17 | 105 | 55 | HRG Histidine-rich glycoprotein precursor | n[145]SGFPQVSM[147]FFHTTFPK[272]      | 3 | 721.371   | 2.823 | 0.22  |
| 45 | IPI00022371 | 1 | 42.1 | 0.89 | 0.17 | 105 | 55 | HRG Histidine-rich glycoprotein precursor | n[145]ALDLINK[272]                    | 2 | 537.8417  | 2.807 | 0.083 |
| 45 | IPI00022371 | 1 | 42.1 | 0.89 | 0.17 | 105 | 55 | HRG Histidine-rich glycoprotein precursor | n[145]SSTTK[272]PPFK[272]PHGSR        | 3 | 653.7094  | 2.884 | 0.179 |

|    |             |   |      |      |      |     |    |                                                      |                                    |   |           |       |       |
|----|-------------|---|------|------|------|-----|----|------------------------------------------------------|------------------------------------|---|-----------|-------|-------|
| 45 | IPI00022371 | 1 | 42.1 | 0.89 | 0.17 | 105 | 55 | HRG Histidine-rich glycoprotein precursor            | ALDLINK                            | 2 | 533.8346  | 2.319 | 0.079 |
| 45 | IPI00022371 | 1 | 42.1 | 0.89 | 0.17 | 105 | 55 | HRG Histidine-rich glycoprotein precursor            | n[145]IAD AHLDR                    | 3 | 352.1969  | 1.617 | 0.178 |
| 45 | IPI00022371 | 1 | 42.1 | 0.89 | 0.17 | 105 | 55 | HRG Histidine-rich glycoprotein precursor            | SGFPQVSM[147]FFTH                  | 2 | 770.8663  | 2.798 | 0.484 |
| 45 | IPI00022371 | 1 | 42.1 | 0.89 | 0.17 | 105 | 55 | HRG Histidine-rich glycoprotein precursor            | IAD AHLDR                          | 3 | 350.8612  | 1.995 | 0.093 |
| 45 | IPI00022371 | 1 | 42.1 | 0.89 | 0.17 | 105 | 55 | HRG Histidine-rich glycoprotein precursor            | n[145]RDG YLFQLLR                  | 2 | 712.9102  | 2.422 | 0.159 |
| 45 | IPI00022371 | 1 | 42.1 | 0.89 | 0.17 | 105 | 55 | HRG Histidine-rich glycoprotein precursor            | DHSHGPPLPQ GPPPLLPM[147]           | 2 | 1022.0277 | 3.459 | 0.415 |
| 45 | IPI00022371 | 1 | 42.1 | 0.89 | 0.17 | 105 | 55 | HRG Histidine-rich glycoprotein precursor            | GEVLPLPEANFPSFPLPH                 | 2 | 1051.0595 | 3.888 | 0.381 |
| 45 | IPI00022371 | 1 | 42.1 | 0.89 | 0.17 | 105 | 55 | HRG Histidine-rich glycoprotein precursor            | n[145]DHHHPHK[272]PHEHGPPPPDER     | 5 | 528.4661  | 2.339 | 0.092 |
| 45 | IPI00022371 | 1 | 42.1 | 0.89 | 0.17 | 105 | 55 | HRG Histidine-rich glycoprotein precursor            | n[145]DHSHGPPLPQ GPPPLLPM[147]SC   | 3 | 761.6995  | 2.298 | 0.309 |
| 45 | IPI00022371 | 1 | 42.1 | 0.89 | 0.17 | 105 | 55 | HRG Histidine-rich glycoprotein precursor            | n[145]NVFGFCR                      | 2 | 516.7474  | 2.44  | 0.281 |
| 45 | IPI00022371 | 1 | 42.1 | 0.89 | 0.17 | 105 | 55 | HRG Histidine-rich glycoprotein precursor            | RPSEIVIGQCK                        | 3 | 519.2864  | 2.414 | 0.11  |
| 45 | IPI00022371 | 1 | 42.1 | 0.89 | 0.17 | 105 | 55 | HRG Histidine-rich glycoprotein precursor            | NVFGFCR                            | 2 | 514.7439  | 2.128 | 0.251 |
| 45 | IPI00022371 | 1 | 42.1 | 0.89 | 0.17 | 105 | 55 | HRG Histidine-rich glycoprotein precursor            | n[145]HPNVFVG                      | 2 | 481.2543  | 2.261 | 0.17  |
| 45 | IPI00022371 | 1 | 42.1 | 0.89 | 0.17 | 105 | 55 | HRG Histidine-rich glycoprotein precursor            | n[145]SGFPQVSM[147]FFTH            | 2 | 772.8699  | 2.345 | 0.264 |
| 45 | IPI00022371 | 1 | 42.1 | 0.89 | 0.17 | 105 | 55 | HRG Histidine-rich glycoprotein precursor            | HPNVFVG                            | 2 | 479.2507  | 2.07  | 0.14  |
| 45 | IPI00022371 | 1 | 42.1 | 0.89 | 0.17 | 105 | 55 | HRG Histidine-rich glycoprotein precursor            | HPLKPDNQFPQSVSESPGK                | 4 | 690.3506  | 2.174 | 0.047 |
| 45 | IPI00022371 | 1 | 42.1 | 0.89 | 0.17 | 105 | 55 | HRG Histidine-rich glycoprotein precursor            | SEIVIGQCK                          | 2 | 651.8491  | 3.142 | 0.302 |
| 46 | IPI00022391 | 1 | 32.7 | 0.79 | 0.09 | 20  | 14 | APCS Serum amyloid P-component precursor             | IVLGQEQDSYGK                       | 2 | 837.4465  | 4.304 | 0.466 |
| 46 | IPI00022391 | 1 | 32.7 | 0.79 | 0.09 | 20  | 14 | APCS Serum amyloid P-component precursor             | QGYFVEAQPK                         | 2 | 723.8907  | 3.229 | 0.32  |
| 46 | IPI00022391 | 1 | 32.7 | 0.79 | 0.09 | 20  | 14 | APCS Serum amyloid P-component precursor             | n[145]AYS LFSYNTQGR                | 2 | 775.8896  | 3.894 | 0.453 |
| 46 | IPI00022391 | 1 | 32.7 | 0.79 | 0.09 | 20  | 14 | APCS Serum amyloid P-component precursor             | n[145]QGYFVEAQPK[272]              | 2 | 727.8978  | 3.285 | 0.375 |
| 46 | IPI00022391 | 1 | 32.7 | 0.79 | 0.09 | 20  | 14 | APCS Serum amyloid P-component precursor             | n[145]AYS LFSYNTQGRDNELLVYK[272]ER | 4 | 739.3867  | 5.231 | 0.462 |
| 46 | IPI00022391 | 1 | 32.7 | 0.79 | 0.09 | 20  | 14 | APCS Serum amyloid P-component precursor             | n[145]VGEYS LYGR                   | 2 | 650.8545  | 2.634 | 0.313 |
| 46 | IPI00022391 | 1 | 32.7 | 0.79 | 0.09 | 20  | 14 | APCS Serum amyloid P-component precursor             | AYS LFSYNTQGR                      | 2 | 773.8861  | 3.328 | 0.419 |
| 46 | IPI00022391 | 1 | 32.7 | 0.79 | 0.09 | 20  | 14 | APCS Serum amyloid P-component precursor             | n[145]AYS LFSYNTQGRDNELLVYK[272]ER | 3 | 985.5132  | 4.461 | 0.352 |
| 46 | IPI00022391 | 1 | 32.7 | 0.79 | 0.09 | 20  | 14 | APCS Serum amyloid P-component precursor             | n[145]IVLGQEQDSYGK[272]            | 2 | 841.4536  | 3.168 | 0.168 |
| 46 | IPI00022391 | 1 | 32.7 | 0.79 | 0.09 | 20  | 14 | APCS Serum amyloid P-component precursor             | n[145]VVFVPR                       | 2 | 454.7774  | 1.961 | 0.161 |
| 46 | IPI00022391 | 1 | 32.7 | 0.79 | 0.09 | 20  | 14 | APCS Serum amyloid P-component precursor             | VVFVPR                             | 2 | 452.7738  | 1.971 | 0.015 |
| 46 | IPI00022391 | 1 | 32.7 | 0.79 | 0.09 | 20  | 14 | APCS Serum amyloid P-component precursor             | HTDLSGK VVFVPR                     | 3 | 595.0053  | 2.82  | 0.366 |
| 46 | IPI00022391 | 1 | 32.7 | 0.79 | 0.09 | 20  | 14 | APCS Serum amyloid P-component precursor             | n[145]HTDLSGK[272]VVFVPR           | 4 | 448.5094  | 2.601 | 0.24  |
| 46 | IPI00022391 | 1 | 32.7 | 0.79 | 0.09 | 20  | 14 | APCS Serum amyloid P-component precursor             | n[145]HTDLSGK[272]VVFVPR           | 3 | 597.6767  | 2.85  | 0.169 |
| 46 | IPI00022391 | 1 | 32.7 | 0.79 | 0.09 | 20  | 14 | APCS Serum amyloid P-component precursor             | KVIEK                              | 2 | 518.8476  | 2.301 | 0.075 |
| 47 | IPI00022392 | 1 | 10   | 0.72 | 0.05 | 13  | 3  | C1QA Complement C1q subcomponent subunit A precursor | SLGFCDTTNK                         | 2 | 706.3391  | 3.532 | 0.284 |
| 47 | IPI00022392 | 1 | 10   | 0.72 | 0.05 | 13  | 3  | C1QA Complement C1q subcomponent subunit A precursor | n[145]SLGFCDTTNK[272]              | 2 | 710.3462  | 3.549 | 0.411 |
| 47 | IPI00022392 | 1 | 10   | 0.72 | 0.05 | 13  | 3  | C1QA Complement C1q subcomponent subunit A precursor | n[145]PAFSAIR                      | 2 | 453.2699  | 1.82  | 0.144 |
| 47 | IPI00022392 | 1 | 10   | 0.72 | 0.05 | 13  | 3  | C1QA Complement C1q subcomponent subunit A precursor | n[145]EDLCR                        | 2 | 413.1894  | 1.977 | 0.143 |
| 48 | IPI00022394 | 1 | 21.2 | 0.73 | 0.02 | 6   | 5  | C1QC Complement C1q subcomponent subunit C precursor | FNAVL TNPQGDYDTSTGK                | 2 | 1104.5502 | 5.983 | 0.537 |
| 48 | IPI00022394 | 1 | 21.2 | 0.73 | 0.02 | 6   | 5  | C1QC Complement C1q subcomponent subunit C precursor | n[145]FNAVL TNPQGDYDTSTGK[272]     | 2 | 1108.5573 | 5.753 | 0.569 |
| 48 | IPI00022394 | 1 | 21.2 | 0.73 | 0.02 | 6   | 5  | C1QC Complement C1q subcomponent subunit C precursor | n[145]QTHQP PPN SLIR               | 3 | 534.9659  | 3.174 | 0.295 |
| 48 | IPI00022394 | 1 | 21.2 | 0.73 | 0.02 | 6   | 5  | C1QC Complement C1q subcomponent subunit C precursor | n[145]TNQVNSGGVLLR                 | 2 | 701.4002  | 4.007 | 0.27  |
| 48 | IPI00022394 | 1 | 21.2 | 0.73 | 0.02 | 6   | 5  | C1QC Complement C1q subcomponent subunit C precursor | n[145]FQS VFTVTR                   | 2 | 614.844   | 2.88  | 0.231 |
| 49 | IPI00022395 | 1 | 27.2 | 0.79 | 0.23 | 40  | 30 | C9 Complement component C9 precursor                 | TEHYEEQIEAFK                       | 2 | 902.4493  | 4.478 | 0.514 |
| 49 | IPI00022395 | 1 | 27.2 | 0.79 | 0.23 | 40  | 30 | C9 Complement component C9 precursor                 | n[145]TEHYEEQIEAFK[272]            | 2 | 906.4564  | 4.547 | 0.39  |
| 49 | IPI00022395 | 1 | 27.2 | 0.79 | 0.23 | 40  | 30 | C9 Complement component C9 precursor                 | AEQCCEETASSISLHGK                  | 3 | 722.3213  | 3.739 | 0.478 |
| 49 | IPI00022395 | 1 | 27.2 | 0.79 | 0.23 | 40  | 30 | C9 Complement component C9 precursor                 | n[145]AEQCCEETASSISLHGK[272]       | 3 | 724.9927  | 3.491 | 0.351 |
| 49 | IPI00022395 | 1 | 27.2 | 0.79 | 0.23 | 40  | 30 | C9 Complement component C9 precursor                 | KYAFELK                            | 3 | 440.2676  | 2.921 | 0.228 |
| 49 | IPI00022395 | 1 | 27.2 | 0.79 | 0.23 | 40  | 30 | C9 Complement component C9 precursor                 | n[145]CTDAVGDRR                    | 3 | 394.854   | 2.266 | 0.243 |
| 49 | IPI00022395 | 1 | 27.2 | 0.79 | 0.23 | 40  | 30 | C9 Complement component C9 precursor                 | LSPIYNLVPVK                        | 2 | 761.9715  | 3.578 | 0.387 |

|    |             |   |      |      |      |    |    |                                                  |                             |   |          |       |       |
|----|-------------|---|------|------|------|----|----|--------------------------------------------------|-----------------------------|---|----------|-------|-------|
| 49 | IPI00022395 | 1 | 27.2 | 0.79 | 0.23 | 40 | 30 | C9 Complement component C9 precursor             | n[145]CLCACPFK[272]         | 2 | 655.7786 | 2.871 | 0.415 |
| 49 | IPI00022395 | 1 | 27.2 | 0.79 | 0.23 | 40 | 30 | C9 Complement component C9 precursor             | n[145]LSPIYNLVPVK[272]      | 2 | 765.9786 | 3.126 | 0.414 |
| 49 | IPI00022395 | 1 | 27.2 | 0.79 | 0.23 | 40 | 30 | C9 Complement component C9 precursor             | n[145]DRDGNTLTYR            | 3 | 506.587  | 3.672 | 0.281 |
| 49 | IPI00022395 | 1 | 27.2 | 0.79 | 0.23 | 40 | 30 | C9 Complement component C9 precursor             | n[145]GEIHLGR               | 2 | 463.2704 | 3.044 | 0.3   |
| 49 | IPI00022395 | 1 | 27.2 | 0.79 | 0.23 | 40 | 30 | C9 Complement component C9 precursor             | n[145]VVEESELAR             | 2 | 588.3231 | 1.851 | 0.158 |
| 49 | IPI00022395 | 1 | 27.2 | 0.79 | 0.23 | 40 | 30 | C9 Complement component C9 precursor             | n[145]DGNTLTYR              | 2 | 623.8129 | 2.737 | 0.325 |
| 49 | IPI00022395 | 1 | 27.2 | 0.79 | 0.23 | 40 | 30 | C9 Complement component C9 precursor             | ALPTTYEK                    | 2 | 601.8426 | 2.32  | 0.058 |
| 49 | IPI00022395 | 1 | 27.2 | 0.79 | 0.23 | 40 | 30 | C9 Complement component C9 precursor             | DVVLTTTFVDDIK               | 2 | 873.4879 | 3.999 | 0.292 |
| 49 | IPI00022395 | 1 | 27.2 | 0.79 | 0.23 | 40 | 30 | C9 Complement component C9 precursor             | n[145]RPWNVASLIYETK         | 3 | 621.0199 | 3.95  | 0.257 |
| 49 | IPI00022395 | 1 | 27.2 | 0.79 | 0.23 | 40 | 30 | C9 Complement component C9 precursor             | KGVELK                      | 3 | 365.2413 | 2.606 | 0.144 |
| 49 | IPI00022395 | 1 | 27.2 | 0.79 | 0.23 | 40 | 30 | C9 Complement component C9 precursor             | n[145]ALPTTYEK[272]         | 2 | 605.8497 | 2.334 | 0.009 |
| 49 | IPI00022395 | 1 | 27.2 | 0.79 | 0.23 | 40 | 30 | C9 Complement component C9 precursor             | n[145]CTDAVGDR              | 2 | 513.7269 | 2.855 | 0.219 |
| 49 | IPI00022395 | 1 | 27.2 | 0.79 | 0.23 | 40 | 30 | C9 Complement component C9 precursor             | n[145]FTPTEKNK[272]         | 2 | 613.337  | 2.303 | 0.247 |
| 49 | IPI00022395 | 1 | 27.2 | 0.79 | 0.23 | 40 | 30 | C9 Complement component C9 precursor             | FTPTEKN                     | 2 | 609.3299 | 2.325 | 0.135 |
| 49 | IPI00022395 | 1 | 27.2 | 0.79 | 0.23 | 40 | 30 | C9 Complement component C9 precursor             | n[145]JCTDAVGDRR            | 2 | 591.7774 | 2.523 | 0.116 |
| 49 | IPI00022395 | 1 | 27.2 | 0.79 | 0.23 | 40 | 30 | C9 Complement component C9 precursor             | n[145]TEHYEEQIEAFK[272]     | 3 | 604.64   | 3.499 | 0.062 |
| 49 | IPI00022395 | 1 | 27.2 | 0.79 | 0.23 | 40 | 30 | C9 Complement component C9 precursor             | CLCACPFK                    | 2 | 651.7715 | 2.017 | 0.193 |
| 49 | IPI00022395 | 1 | 27.2 | 0.79 | 0.23 | 40 | 30 | C9 Complement component C9 precursor             | KYAFELK                     | 2 | 659.8978 | 2.21  | 0.072 |
| 49 | IPI00022395 | 1 | 27.2 | 0.79 | 0.23 | 40 | 30 | C9 Complement component C9 precursor             | n[145]GEIHLGR               | 3 | 309.1827 | 2.781 | 0.032 |
| 49 | IPI00022395 | 1 | 27.2 | 0.79 | 0.23 | 40 | 30 | C9 Complement component C9 precursor             | n[145]DVVLTTTFVDDIK[272]    | 2 | 877.495  | 3.212 | 0.368 |
| 49 | IPI00022395 | 1 | 27.2 | 0.79 | 0.23 | 40 | 30 | C9 Complement component C9 precursor             | TEHYEEQIEAFK                | 3 | 601.9686 | 2.268 | 0.114 |
| 49 | IPI00022395 | 1 | 27.2 | 0.79 | 0.23 | 40 | 30 | C9 Complement component C9 precursor             | n[145]FEGICEISK[272]        | 2 | 715.8667 | 2.006 | 0.078 |
| 49 | IPI00022395 | 1 | 27.2 | 0.79 | 0.23 | 40 | 30 | C9 Complement component C9 precursor             | YAFELK                      | 2 | 525.8028 | 1.521 | 0.06  |
| 49 | IPI00022395 | 1 | 27.2 | 0.79 | 0.23 | 40 | 30 | C9 Complement component C9 precursor             | SK[272]K[272]               | 2 | 395.7731 | 0.913 | 0.136 |
| 50 | IPI00022417 | 1 | 19   | 0.72 | 0.05 | 11 | 8  | LRG1 Leucine-rich alpha-2-glycoprotein precursor | n[145]ALGHLDSLGNR           | 2 | 648.8607 | 4.039 | 0.456 |
| 50 | IPI00022417 | 1 | 19   | 0.72 | 0.05 | 11 | 8  | LRG1 Leucine-rich alpha-2-glycoprotein precursor | n[145]VAAGAFQGLR            | 2 | 567.331  | 3.382 | 0.366 |
| 50 | IPI00022417 | 1 | 19   | 0.72 | 0.05 | 11 | 8  | LRG1 Leucine-rich alpha-2-glycoprotein precursor | n[145]ALGHLDSLGNR           | 3 | 432.9095 | 2.867 | 0.259 |
| 50 | IPI00022417 | 1 | 19   | 0.72 | 0.05 | 11 | 8  | LRG1 Leucine-rich alpha-2-glycoprotein precursor | n[145]LHLEGNK[272]          | 3 | 366.8885 | 3.098 | 0.164 |
| 50 | IPI00022417 | 1 | 19   | 0.72 | 0.05 | 11 | 8  | LRG1 Leucine-rich alpha-2-glycoprotein precursor | LHLEGNK                     | 3 | 364.2171 | 2.502 | 0.201 |
| 50 | IPI00022417 | 1 | 19   | 0.72 | 0.05 | 11 | 8  | LRG1 Leucine-rich alpha-2-glycoprotein precursor | n[145]DCQVFR                | 2 | 479.2238 | 1.892 | 0.092 |
| 50 | IPI00022417 | 1 | 19   | 0.72 | 0.05 | 11 | 8  | LRG1 Leucine-rich alpha-2-glycoprotein precursor | n[145]CAGPEAVK[272]         | 2 | 554.7903 | 2.226 | 0.186 |
| 50 | IPI00022417 | 1 | 19   | 0.72 | 0.05 | 11 | 8  | LRG1 Leucine-rich alpha-2-glycoprotein precursor | ENQLEVLEVSWLHGLK[272]       | 3 | 726.7395 | 3.587 | 0.141 |
| 50 | IPI00022417 | 1 | 19   | 0.72 | 0.05 | 11 | 8  | LRG1 Leucine-rich alpha-2-glycoprotein precursor | GIQPHVSR                    | 2 | 517.2987 | 1.545 | 0.092 |
| 51 | IPI00022420 | 1 | 48.2 | 0.82 | 0.14 | 27 | 21 | RBP4 Plasma retinol-binding protein precursor    | n[145]LIVHNGYCDGR           | 3 | 479.568  | 3.379 | 0.296 |
| 51 | IPI00022420 | 1 | 48.2 | 0.82 | 0.14 | 27 | 21 | RBP4 Plasma retinol-binding protein precursor    | n[145]LIVHNGYCDGR           | 2 | 718.8484 | 2.47  | 0.207 |
| 51 | IPI00022420 | 1 | 48.2 | 0.82 | 0.14 | 27 | 21 | RBP4 Plasma retinol-binding protein precursor    | n[145]QRQEELCLAR            | 3 | 479.2471 | 1.998 | 0.09  |
| 51 | IPI00022420 | 1 | 48.2 | 0.82 | 0.14 | 27 | 21 | RBP4 Plasma retinol-binding protein precursor    | n[145]DPNGLPPEAQK[272]      | 2 | 727.3981 | 3.441 | 0.35  |
| 51 | IPI00022420 | 1 | 48.2 | 0.82 | 0.14 | 27 | 21 | RBP4 Plasma retinol-binding protein precursor    | n[145]QEELCLAR              | 2 | 576.2871 | 2.754 | 0.212 |
| 51 | IPI00022420 | 1 | 48.2 | 0.82 | 0.14 | 27 | 21 | RBP4 Plasma retinol-binding protein precursor    | n[145]GNDDHWIVDTDYDYAVQYSCR | 3 | 942.7346 | 2.649 | 0.195 |
| 51 | IPI00022420 | 1 | 48.2 | 0.82 | 0.14 | 27 | 21 | RBP4 Plasma retinol-binding protein precursor    | n[145]YWGVASFLQK            | 2 | 741.9149 | 3.255 | 0.306 |
| 51 | IPI00022420 | 1 | 48.2 | 0.82 | 0.14 | 27 | 21 | RBP4 Plasma retinol-binding protein precursor    | n[145]LLNLDTGTCADSYFVFSR    | 3 | 733.3508 | 2.407 | 0.146 |
| 51 | IPI00022420 | 1 | 48.2 | 0.82 | 0.14 | 27 | 21 | RBP4 Plasma retinol-binding protein precursor    | n[145]QRQEELCLAR            | 2 | 718.367  | 3.156 | 0.237 |
| 51 | IPI00022420 | 1 | 48.2 | 0.82 | 0.14 | 27 | 21 | RBP4 Plasma retinol-binding protein precursor    | n[145]VK[272]JENFDK[272]AR  | 2 | 769.9544 | 2.765 | 0.199 |
| 51 | IPI00022420 | 1 | 48.2 | 0.82 | 0.14 | 27 | 21 | RBP4 Plasma retinol-binding protein precursor    | VKENFDKAR                   | 2 | 763.9438 | 2.684 | 0.259 |
| 51 | IPI00022420 | 1 | 48.2 | 0.82 | 0.14 | 27 | 21 | RBP4 Plasma retinol-binding protein precursor    | n[145]VK[272]JENFDK[272]AR  | 3 | 513.6387 | 2.345 | 0.171 |
| 51 | IPI00022420 | 1 | 48.2 | 0.82 | 0.14 | 27 | 21 | RBP4 Plasma retinol-binding protein precursor    | VKENFDKAR                   | 3 | 509.6316 | 2.413 | 0.153 |
| 51 | IPI00022420 | 1 | 48.2 | 0.82 | 0.14 | 27 | 21 | RBP4 Plasma retinol-binding protein precursor    | VKENFDK                     | 2 | 650.3747 | 2.544 | 0.136 |
| 51 | IPI00022420 | 1 | 48.2 | 0.82 | 0.14 | 27 | 21 | RBP4 Plasma retinol-binding protein precursor    | n[145]YWGVASFLQK            | 3 | 494.9457 | 3.199 | 0.142 |

|    |             |   |      |      |      |    |    |                                               |                                 |   |           |       |       |
|----|-------------|---|------|------|------|----|----|-----------------------------------------------|---------------------------------|---|-----------|-------|-------|
| 51 | IPI00022420 | 1 | 48.2 | 0.82 | 0.14 | 27 | 21 | RBP4 Plasma retinol-binding protein precursor | n[145]VK[272]ENFDK[272]         | 3 | 437.926   | 2.189 | 0.139 |
| 51 | IPI00022420 | 1 | 48.2 | 0.82 | 0.14 | 27 | 21 | RBP4 Plasma retinol-binding protein precursor | n[145]VSSFR                     | 2 | 370.2146  | 1.747 | 0.054 |
| 51 | IPI00022420 | 1 | 48.2 | 0.82 | 0.14 | 27 | 21 | RBP4 Plasma retinol-binding protein precursor | n[145]VK[272]ENFDK[272]         | 2 | 656.3853  | 2.279 | 0.086 |
| 51 | IPI00022420 | 1 | 48.2 | 0.82 | 0.14 | 27 | 21 | RBP4 Plasma retinol-binding protein precursor | VKENFDKAR                       | 4 | 382.4755  | 1.896 | 0.019 |
| 51 | IPI00022420 | 1 | 48.2 | 0.82 | 0.14 | 27 | 21 | RBP4 Plasma retinol-binding protein precursor | n[145]AVQYSCR                   | 2 | 508.7423  | 1.981 | 0.177 |
| 51 | IPI00022420 | 1 | 48.2 | 0.82 | 0.14 | 27 | 21 | RBP4 Plasma retinol-binding protein precursor | VKENFDK                         | 3 | 433.9189  | 1.83  | 0.019 |
| 52 | IPI00022426 | 1 | 34.7 | 0.73 | 0.04 | 23 | 16 | AMBP AMBP protein precursor                   | AFIQLWAFDAVK                    | 2 | 844.9798  | 3.989 | 0.529 |
| 52 | IPI00022426 | 1 | 34.7 | 0.73 | 0.04 | 23 | 16 | AMBP AMBP protein precursor                   | GVCEETSGAYEK                    | 2 | 799.8631  | 3.869 | 0.434 |
| 52 | IPI00022426 | 1 | 34.7 | 0.73 | 0.04 | 23 | 16 | AMBP AMBP protein precursor                   | n[145]GECVPGEQEPILIPR           | 2 | 1027.0144 | 3.962 | 0.523 |
| 52 | IPI00022426 | 1 | 34.7 | 0.73 | 0.04 | 23 | 16 | AMBP AMBP protein precursor                   | n[145]GVCEETSGAYEK[272]         | 2 | 803.8702  | 3.535 | 0.524 |
| 52 | IPI00022426 | 1 | 34.7 | 0.73 | 0.04 | 23 | 16 | AMBP AMBP protein precursor                   | n[145]TVAACNLPIVR               | 2 | 673.8739  | 3.769 | 0.362 |
| 52 | IPI00022426 | 1 | 34.7 | 0.73 | 0.04 | 23 | 16 | AMBP AMBP protein precursor                   | n[145]EYCGVPGDGDDELLR           | 2 | 921.412   | 3.083 | 0.455 |
| 52 | IPI00022426 | 1 | 34.7 | 0.73 | 0.04 | 23 | 16 | AMBP AMBP protein precursor                   | n[145]HHGPTITAK[272]            | 3 | 417.2467  | 3.147 | 0.188 |
| 52 | IPI00022426 | 1 | 34.7 | 0.73 | 0.04 | 23 | 16 | AMBP AMBP protein precursor                   | n[145]CVLFPYGGCCQNGNK[272]      | 2 | 968.9427  | 2.692 | 0.443 |
| 52 | IPI00022426 | 1 | 34.7 | 0.73 | 0.04 | 23 | 16 | AMBP AMBP protein precursor                   | n[145]ECLQTCR                   | 2 | 544.7275  | 2.137 | 0.259 |
| 52 | IPI00022426 | 1 | 34.7 | 0.73 | 0.04 | 23 | 16 | AMBP AMBP protein precursor                   | HHGPTITAK                       | 3 | 414.5753  | 3.062 | 0.06  |
| 52 | IPI00022426 | 1 | 34.7 | 0.73 | 0.04 | 23 | 16 | AMBP AMBP protein precursor                   | n[145]HHGPTITAK[272]            | 2 | 625.3664  | 1.879 | 0.195 |
| 52 | IPI00022426 | 1 | 34.7 | 0.73 | 0.04 | 23 | 16 | AMBP AMBP protein precursor                   | n[145]SAGPCM[147]GM[147]TSR     | 2 | 660.2703  | 2.582 | 0.49  |
| 52 | IPI00022426 | 1 | 34.7 | 0.73 | 0.04 | 23 | 16 | AMBP AMBP protein precursor                   | n[145]FYSEK[272]                | 2 | 481.2653  | 1.408 | 0.025 |
| 52 | IPI00022426 | 1 | 34.7 | 0.73 | 0.04 | 23 | 16 | AMBP AMBP protein precursor                   | CVLFPYGGCCQNGNK                 | 2 | 964.9356  | 2.373 | 0.312 |
| 52 | IPI00022426 | 1 | 34.7 | 0.73 | 0.04 | 23 | 16 | AMBP AMBP protein precursor                   | n[145]GNNFVTEK[272]             | 2 | 598.8293  | 2.61  | 0.116 |
| 52 | IPI00022426 | 1 | 34.7 | 0.73 | 0.04 | 23 | 16 | AMBP AMBP protein precursor                   | GNNFVTEK                        | 2 | 594.8222  | 2.222 | 0.061 |
| 53 | IPI00022429 | 1 | 48.3 | 0.6  | 0.09 | 67 | 41 | ORM1 Alpha-1-acid glycoprotein 1 precursor    | TYMLAFDVNDEK                    | 2 | 863.4295  | 3.986 | 0.413 |
| 53 | IPI00022429 | 1 | 48.3 | 0.6  | 0.09 | 67 | 41 | ORM1 Alpha-1-acid glycoprotein 1 precursor    | TYM[147]LAFDVNDEK               | 2 | 871.4269  | 4.347 | 0.519 |
| 53 | IPI00022429 | 1 | 48.3 | 0.6  | 0.09 | 67 | 41 | ORM1 Alpha-1-acid glycoprotein 1 precursor    | n[145]EQLGEFYEALDCLR            | 2 | 938.4405  | 4.97  | 0.591 |
| 53 | IPI00022429 | 1 | 48.3 | 0.6  | 0.09 | 67 | 41 | ORM1 Alpha-1-acid glycoprotein 1 precursor    | n[145]TYMLAFDVNDEK[272]         | 2 | 867.4366  | 4.147 | 0.435 |
| 53 | IPI00022429 | 1 | 48.3 | 0.6  | 0.09 | 67 | 41 | ORM1 Alpha-1-acid glycoprotein 1 precursor    | n[145]VGGQEHFAHLLILR            | 2 | 867.5002  | 4.714 | 0.417 |
| 53 | IPI00022429 | 1 | 48.3 | 0.6  | 0.09 | 67 | 41 | ORM1 Alpha-1-acid glycoprotein 1 precursor    | n[145]YVGGQEHFAHLLILR           | 2 | 949.0319  | 6.59  | 0.566 |
| 53 | IPI00022429 | 1 | 48.3 | 0.6  | 0.09 | 67 | 41 | ORM1 Alpha-1-acid glycoprotein 1 precursor    | n[145]YVGGQEHFAH                | 3 | 430.2112  | 3.285 | 0.363 |
| 53 | IPI00022429 | 1 | 48.3 | 0.6  | 0.09 | 67 | 41 | ORM1 Alpha-1-acid glycoprotein 1 precursor    | n[145]YVGGQEHFAHLLILR           | 3 | 633.0237  | 2.878 | 0.172 |
| 53 | IPI00022429 | 1 | 48.3 | 0.6  | 0.09 | 67 | 41 | ORM1 Alpha-1-acid glycoprotein 1 precursor    | NWGLSVYADKPETTK                 | 3 | 710.3845  | 3.081 | 0.345 |
| 53 | IPI00022429 | 1 | 48.3 | 0.6  | 0.09 | 67 | 41 | ORM1 Alpha-1-acid glycoprotein 1 precursor    | n[145]GLSVYADK[272]PETTK[272]   | 3 | 614.3509  | 4.239 | 0.408 |
| 53 | IPI00022429 | 1 | 48.3 | 0.6  | 0.09 | 67 | 41 | ORM1 Alpha-1-acid glycoprotein 1 precursor    | n[145]YVGGQEHFAHLLILR           | 4 | 475.0196  | 4.339 | 0.257 |
| 53 | IPI00022429 | 1 | 48.3 | 0.6  | 0.09 | 67 | 41 | ORM1 Alpha-1-acid glycoprotein 1 precursor    | SDVVYTDWK                       | 2 | 696.8616  | 2.874 | 0.296 |
| 53 | IPI00022429 | 1 | 48.3 | 0.6  | 0.09 | 67 | 41 | ORM1 Alpha-1-acid glycoprotein 1 precursor    | n[145]DK[272]CEPLEK[272]        | 3 | 480.5915  | 3.228 | 0.147 |
| 53 | IPI00022429 | 1 | 48.3 | 0.6  | 0.09 | 67 | 41 | ORM1 Alpha-1-acid glycoprotein 1 precursor    | n[145]EQLGEFYEALDCLR            | 3 | 625.9628  | 2.196 | 0.072 |
| 53 | IPI00022429 | 1 | 48.3 | 0.6  | 0.09 | 67 | 41 | ORM1 Alpha-1-acid glycoprotein 1 precursor    | n[145]NWGLSVYADKPETTK           | 3 | 711.7202  | 3.502 | 0.185 |
| 53 | IPI00022429 | 1 | 48.3 | 0.6  | 0.09 | 67 | 41 | ORM1 Alpha-1-acid glycoprotein 1 precursor    | n[145]NWGLSVYADK[272]PETTK[272] | 3 | 714.3916  | 3.078 | 0.321 |
| 53 | IPI00022429 | 1 | 48.3 | 0.6  | 0.09 | 67 | 41 | ORM1 Alpha-1-acid glycoprotein 1 precursor    | n[145]QEHEFAHLLILR              | 3 | 507.6321  | 3.456 | 0.426 |
| 53 | IPI00022429 | 1 | 48.3 | 0.6  | 0.09 | 67 | 41 | ORM1 Alpha-1-acid glycoprotein 1 precursor    | DKCEPLEK                        | 3 | 476.5844  | 2.348 | 0.263 |
| 53 | IPI00022429 | 1 | 48.3 | 0.6  | 0.09 | 67 | 41 | ORM1 Alpha-1-acid glycoprotein 1 precursor    | n[145]SDVVYTDWK[272]            | 2 | 700.8687  | 2.514 | 0.13  |
| 53 | IPI00022429 | 1 | 48.3 | 0.6  | 0.09 | 67 | 41 | ORM1 Alpha-1-acid glycoprotein 1 precursor    | n[145]TYM[147]LAFDVNDEK[272]    | 2 | 875.434   | 2.952 | 0.308 |
| 53 | IPI00022429 | 1 | 48.3 | 0.6  | 0.09 | 67 | 41 | ORM1 Alpha-1-acid glycoprotein 1 precursor    | n[145]VGGQEHFAHLLILR            | 3 | 578.6692  | 4.04  | 0.37  |
| 53 | IPI00022429 | 1 | 48.3 | 0.6  | 0.09 | 67 | 41 | ORM1 Alpha-1-acid glycoprotein 1 precursor    | n[145]TEDITFLR                  | 1 | 1138.6225 | 2.6   | 0.235 |
| 53 | IPI00022429 | 1 | 48.3 | 0.6  | 0.09 | 67 | 41 | ORM1 Alpha-1-acid glycoprotein 1 precursor    | n[145]TEDITFLR                  | 2 | 569.8149  | 2.252 | 0.02  |
| 53 | IPI00022429 | 1 | 48.3 | 0.6  | 0.09 | 67 | 41 | ORM1 Alpha-1-acid glycoprotein 1 precursor    | n[145]SDVVYTDWK[272]            | 1 | 1400.7301 | 2.869 | 0.288 |
| 53 | IPI00022429 | 1 | 48.3 | 0.6  | 0.09 | 67 | 41 | ORM1 Alpha-1-acid glycoprotein 1 precursor    | GLSVYADKPETTK                   | 3 | 610.3438  | 3.206 | 0.344 |
| 53 | IPI00022429 | 1 | 48.3 | 0.6  | 0.09 | 67 | 41 | ORM1 Alpha-1-acid glycoprotein 1 precursor    | n[145]QEHEFAHLLILR              | 4 | 380.9759  | 3.196 | 0.306 |

|    |             |   |      |      |      |     |    |                                            |                                    |   |           |       |       |
|----|-------------|---|------|------|------|-----|----|--------------------------------------------|------------------------------------|---|-----------|-------|-------|
| 53 | IP100022429 | 1 | 48.3 | 0.6  | 0.09 | 67  | 41 | ORM1 Alpha-1-acid glycoprotein 1 precursor | n[145]CEPLEK[272]                  | 2 | 526.7716  | 1.507 | 0.229 |
| 53 | IP100022429 | 1 | 48.3 | 0.6  | 0.09 | 67  | 41 | ORM1 Alpha-1-acid glycoprotein 1 precursor | n[145]YVGGQEHAHL                   | 3 | 467.9059  | 3.525 | 0.255 |
| 53 | IP100022429 | 1 | 48.3 | 0.6  | 0.09 | 67  | 41 | ORM1 Alpha-1-acid glycoprotein 1 precursor | n[145]CEPLEK[272]                  | 1 | 1052.5359 | 1.61  | 0.168 |
| 53 | IP100022429 | 1 | 48.3 | 0.6  | 0.09 | 67  | 41 | ORM1 Alpha-1-acid glycoprotein 1 precursor | DKCEPLEK                           | 2 | 714.3729  | 2.542 | 0.263 |
| 53 | IP100022429 | 1 | 48.3 | 0.6  | 0.09 | 67  | 41 | ORM1 Alpha-1-acid glycoprotein 1 precursor | n[145]GQEHAHLILR                   | 3 | 526.6393  | 3.518 | 0.244 |
| 53 | IP100022429 | 1 | 48.3 | 0.6  | 0.09 | 67  | 41 | ORM1 Alpha-1-acid glycoprotein 1 precursor | SDVYTDWK[272]                      | 2 | 698.8651  | 3.278 | 0.34  |
| 53 | IP100022429 | 1 | 48.3 | 0.6  | 0.09 | 67  | 41 | ORM1 Alpha-1-acid glycoprotein 1 precursor | n[145]YVGGQEHAHLL                  | 3 | 505.6006  | 2.284 | 0.339 |
| 53 | IP100022429 | 1 | 48.3 | 0.6  | 0.09 | 67  | 41 | ORM1 Alpha-1-acid glycoprotein 1 precursor | n[145]DK[272]CEPLEK[272]           | 2 | 720.3836  | 2.88  | 0.121 |
| 53 | IP100022429 | 1 | 48.3 | 0.6  | 0.09 | 67  | 41 | ORM1 Alpha-1-acid glycoprotein 1 precursor | n[145]GQEHAHLILR                   | 2 | 789.4553  | 4.07  | 0.396 |
| 53 | IP100022429 | 1 | 48.3 | 0.6  | 0.09 | 67  | 41 | ORM1 Alpha-1-acid glycoprotein 1 precursor | n[145]VGGQEHAHLILR                 | 4 | 434.2538  | 2.997 | 0.197 |
| 53 | IP100022429 | 1 | 48.3 | 0.6  | 0.09 | 67  | 41 | ORM1 Alpha-1-acid glycoprotein 1 precursor | n[145]TTYLVNQR                     | 2 | 569.8205  | 2.844 | 0.349 |
| 53 | IP100022429 | 1 | 48.3 | 0.6  | 0.09 | 67  | 41 | ORM1 Alpha-1-acid glycoprotein 1 precursor | n[145]FYIASAFR                     | 2 | 559.8094  | 2.117 | 0.267 |
| 53 | IP100022429 | 1 | 48.3 | 0.6  | 0.09 | 67  | 41 | ORM1 Alpha-1-acid glycoprotein 1 precursor | n[145]YVGGQEHAHLL                  | 2 | 757.8973  | 3.011 | 0.398 |
| 53 | IP100022429 | 1 | 48.3 | 0.6  | 0.09 | 67  | 41 | ORM1 Alpha-1-acid glycoprotein 1 precursor | CEPLEK                             | 2 | 522.7645  | 1.847 | 0.016 |
| 53 | IP100022429 | 1 | 48.3 | 0.6  | 0.09 | 67  | 41 | ORM1 Alpha-1-acid glycoprotein 1 precursor | n[145]YVGGQEHAH                    | 2 | 644.8132  | 2.62  | 0.197 |
| 53 | IP100022429 | 1 | 48.3 | 0.6  | 0.09 | 67  | 41 | ORM1 Alpha-1-acid glycoprotein 1 precursor | n[145]GQEHAHLILR                   | 4 | 395.2313  | 2.892 | 0.181 |
| 53 | IP100022429 | 1 | 48.3 | 0.6  | 0.09 | 67  | 41 | ORM1 Alpha-1-acid glycoprotein 1 precursor | SDVYTDWK[272]                      | 3 | 466.2458  | 2.664 | 0.146 |
| 53 | IP100022429 | 1 | 48.3 | 0.6  | 0.09 | 67  | 41 | ORM1 Alpha-1-acid glycoprotein 1 precursor | n[145]YIASAFR                      | 2 | 486.2752  | 1.866 | 0.286 |
| 53 | IP100022429 | 1 | 48.3 | 0.6  | 0.09 | 67  | 41 | ORM1 Alpha-1-acid glycoprotein 1 precursor | n[145]IASAFR                       | 2 | 404.7435  | 1.822 | 0.055 |
| 53 | IP100022429 | 1 | 48.3 | 0.6  | 0.09 | 67  | 41 | ORM1 Alpha-1-acid glycoprotein 1 precursor | n[145]YLVNQR                       | 2 | 468.7728  | 1.886 | 0.018 |
| 53 | IP100022429 | 1 | 48.3 | 0.6  | 0.09 | 67  | 41 | ORM1 Alpha-1-acid glycoprotein 1 precursor | n[145]TYLVNQR                      | 2 | 519.2967  | 1.922 | 0.012 |
| 54 | IP100022431 | 1 | 45.5 | 0.76 | 0.1  | 124 | 45 | AHSG Alpha-2-HS-glycoprotein precursor     | EHAVEGDCDFQLLK                     | 2 | 965.4635  | 4.277 | 0.485 |
| 54 | IP100022431 | 1 | 45.5 | 0.76 | 0.1  | 124 | 45 | AHSG Alpha-2-HS-glycoprotein precursor     | M[147]GVVSLGSPSGEVSHPR             | 2 | 926.4727  | 4.851 | 0.415 |
| 54 | IP100022431 | 1 | 45.5 | 0.76 | 0.1  | 124 | 45 | AHSG Alpha-2-HS-glycoprotein precursor     | TVSGTDCVAK                         | 2 | 653.8283  | 3.974 | 0.464 |
| 54 | IP100022431 | 1 | 45.5 | 0.76 | 0.1  | 124 | 45 | AHSG Alpha-2-HS-glycoprotein precursor     | n[145]EHAVEGDCDFQLLK[272]          | 2 | 969.4706  | 5.091 | 0.549 |
| 54 | IP100022431 | 1 | 45.5 | 0.76 | 0.1  | 124 | 45 | AHSG Alpha-2-HS-glycoprotein precursor     | n[145]HTFM[147]GVVSLGSPSGEVSHPR    | 2 | 1121.0638 | 5.508 | 0.577 |
| 54 | IP100022431 | 1 | 45.5 | 0.76 | 0.1  | 124 | 45 | AHSG Alpha-2-HS-glycoprotein precursor     | n[145]HTLNQIDEVK[272]              | 2 | 742.9192  | 2.036 | 0.198 |
| 54 | IP100022431 | 1 | 45.5 | 0.76 | 0.1  | 124 | 45 | AHSG Alpha-2-HS-glycoprotein precursor     | n[145]TVSGTDCVAK[272]              | 2 | 657.8354  | 3.912 | 0.414 |
| 54 | IP100022431 | 1 | 45.5 | 0.76 | 0.1  | 124 | 45 | AHSG Alpha-2-HS-glycoprotein precursor     | n[145]TVVQPSVGAAAGPVVPPCPGR        | 2 | 1075.0726 | 6.269 | 0.477 |
| 54 | IP100022431 | 1 | 45.5 | 0.76 | 0.1  | 124 | 45 | AHSG Alpha-2-HS-glycoprotein precursor     | AQLVPLPSTYVEFTVSGTDCVAK            | 3 | 950.159   | 1.978 | 0.127 |
| 54 | IP100022431 | 1 | 45.5 | 0.76 | 0.1  | 124 | 45 | AHSG Alpha-2-HS-glycoprotein precursor     | LDGKFVYAK                          | 3 | 549.6592  | 3.841 | 0.436 |
| 54 | IP100022431 | 1 | 45.5 | 0.76 | 0.1  | 124 | 45 | AHSG Alpha-2-HS-glycoprotein precursor     | M[147]GVVSLGSPSGEVSHPR             | 3 | 617.9842  | 5.123 | 0.466 |
| 54 | IP100022431 | 1 | 45.5 | 0.76 | 0.1  | 124 | 45 | AHSG Alpha-2-HS-glycoprotein precursor     | n[145]HTFMGVVSLGSPSGEVSHPR         | 3 | 742.38    | 5.258 | 0.465 |
| 54 | IP100022431 | 1 | 45.5 | 0.76 | 0.1  | 124 | 45 | AHSG Alpha-2-HS-glycoprotein precursor     | n[145]HTFM[147]GVVSLGSPSGEVSHPR    | 3 | 747.7116  | 2.633 | 0.355 |
| 54 | IP100022431 | 1 | 45.5 | 0.76 | 0.1  | 124 | 45 | AHSG Alpha-2-HS-glycoprotein precursor     | n[145]LDGK[272]FSVYAK[272]         | 3 | 553.6663  | 3.696 | 0.499 |
| 54 | IP100022431 | 1 | 45.5 | 0.76 | 0.1  | 124 | 45 | AHSG Alpha-2-HS-glycoprotein precursor     | n[145]TVVQPSVGAAAGPVVPPCPGR        | 3 | 717.0508  | 3.5   | 0.291 |
| 54 | IP100022431 | 1 | 45.5 | 0.76 | 0.1  | 124 | 45 | AHSG Alpha-2-HS-glycoprotein precursor     | n[145]VVSLGSPSGEVSHPR              | 3 | 551.301   | 5.01  | 0.394 |
| 54 | IP100022431 | 1 | 45.5 | 0.76 | 0.1  | 124 | 45 | AHSG Alpha-2-HS-glycoprotein precursor     | n[145]AQLVPLPSTYVEFTVSGTDCVAK[272] | 3 | 952.8304  | 2.929 | 0.105 |
| 54 | IP100022431 | 1 | 45.5 | 0.76 | 0.1  | 124 | 45 | AHSG Alpha-2-HS-glycoprotein precursor     | n[145]CNLLAEK[272]QYGFCK[272]      | 3 | 681.0083  | 3.997 | 0.341 |
| 54 | IP100022431 | 1 | 45.5 | 0.76 | 0.1  | 124 | 45 | AHSG Alpha-2-HS-glycoprotein precursor     | n[145]HTLNQIDEVK[272]              | 3 | 495.6152  | 3.645 | 0.292 |
| 54 | IP100022431 | 1 | 45.5 | 0.76 | 0.1  | 124 | 45 | AHSG Alpha-2-HS-glycoprotein precursor     | HTLNQIDEVK                         | 2 | 738.9121  | 1.795 | 0.188 |
| 54 | IP100022431 | 1 | 45.5 | 0.76 | 0.1  | 124 | 45 | AHSG Alpha-2-HS-glycoprotein precursor     | n[145]CNLLAEK[272]                 | 2 | 562.806   | 2.924 | 0.187 |
| 54 | IP100022431 | 1 | 45.5 | 0.76 | 0.1  | 124 | 45 | AHSG Alpha-2-HS-glycoprotein precursor     | n[145]HTFMGVVSLGSPSGEVSHPR         | 4 | 557.0368  | 3.315 | 0.185 |
| 54 | IP100022431 | 1 | 45.5 | 0.76 | 0.1  | 124 | 45 | AHSG Alpha-2-HS-glycoprotein precursor     | n[145]HTFM[147]GVVSLGSPSGEVSHPR    | 4 | 561.0355  | 2.998 | 0.286 |
| 54 | IP100022431 | 1 | 45.5 | 0.76 | 0.1  | 124 | 45 | AHSG Alpha-2-HS-glycoprotein precursor     | CNLLAEK                            | 2 | 558.7989  | 3.119 | 0.262 |
| 54 | IP100022431 | 1 | 45.5 | 0.76 | 0.1  | 124 | 45 | AHSG Alpha-2-HS-glycoprotein precursor     | FSVYAK                             | 2 | 547.3239  | 2.961 | 0.289 |
| 54 | IP100022431 | 1 | 45.5 | 0.76 | 0.1  | 124 | 45 | AHSG Alpha-2-HS-glycoprotein precursor     | n[145]FSVYAK[272]                  | 2 | 551.331   | 2.405 | 0.182 |
| 54 | IP100022431 | 1 | 45.5 | 0.76 | 0.1  | 124 | 45 | AHSG Alpha-2-HS-glycoprotein precursor     | n[145]VLLAAPPQHLHR                 | 3 | 518.3113  | 3.455 | 0.348 |

|    |             |   |      |      |      |     |    |                                        |                                              |   |           |       |       |
|----|-------------|---|------|------|------|-----|----|----------------------------------------|----------------------------------------------|---|-----------|-------|-------|
| 54 | IPI00022431 | 1 | 45.5 | 0.76 | 0.1  | 124 | 45 | AHSG Alpha-2-HS-glycoprotein precursor | CNLLAEK                                      | 1 | 1116.5905 | 2.196 | 0.161 |
| 54 | IPI00022431 | 1 | 45.5 | 0.76 | 0.1  | 124 | 45 | AHSG Alpha-2-HS-glycoprotein precursor | HTLNQIDEVK                                   | 3 | 492.9438  | 3.067 | 0.076 |
| 54 | IPI00022431 | 1 | 45.5 | 0.76 | 0.1  | 124 | 45 | AHSG Alpha-2-HS-glycoprotein precursor | n[145]CNLLAEK[272]                           | 1 | 1124.6047 | 2.005 | 0.178 |
| 54 | IPI00022431 | 1 | 45.5 | 0.76 | 0.1  | 124 | 45 | AHSG Alpha-2-HS-glycoprotein precursor | n[145]GSPSGEVSHPR                            | 3 | 418.55    | 3.038 | 0.372 |
| 54 | IPI00022431 | 1 | 45.5 | 0.76 | 0.1  | 124 | 45 | AHSG Alpha-2-HS-glycoprotein precursor | ATLSEK                                       | 2 | 464.7768  | 2.031 | 0.033 |
| 54 | IPI00022431 | 1 | 45.5 | 0.76 | 0.1  | 124 | 45 | AHSG Alpha-2-HS-glycoprotein precursor | n[145]ATLSEK[272]                            | 2 | 468.7839  | 1.996 | 0.076 |
| 54 | IPI00022431 | 1 | 45.5 | 0.76 | 0.1  | 124 | 45 | AHSG Alpha-2-HS-glycoprotein precursor | n[145]HGPGLIYR                               | 3 | 352.8739  | 2.986 | 0.206 |
| 54 | IPI00022431 | 1 | 45.5 | 0.76 | 0.1  | 124 | 45 | AHSG Alpha-2-HS-glycoprotein precursor | n[145]AHYDLR                                 | 3 | 306.8353  | 2.483 | 0.037 |
| 54 | IPI00022431 | 1 | 45.5 | 0.76 | 0.1  | 124 | 45 | AHSG Alpha-2-HS-glycoprotein precursor | AHYDLR                                       | 3 | 305.4996  | 2.584 | 0.004 |
| 54 | IPI00022431 | 1 | 45.5 | 0.76 | 0.1  | 124 | 45 | AHSG Alpha-2-HS-glycoprotein precursor | n[145]HTFM[147]GVVSLGSPSG                    | 2 | 768.3859  | 3.744 | 0.345 |
| 54 | IPI00022431 | 1 | 45.5 | 0.76 | 0.1  | 124 | 45 | AHSG Alpha-2-HS-glycoprotein precursor | QYGFCCK                                      | 2 | 536.2594  | 1.219 | 0.14  |
| 54 | IPI00022431 | 1 | 45.5 | 0.76 | 0.1  | 124 | 45 | AHSG Alpha-2-HS-glycoprotein precursor | n[145]QYGFCK[272]                            | 2 | 540.2665  | 1.241 | 0.104 |
| 54 | IPI00022431 | 1 | 45.5 | 0.76 | 0.1  | 124 | 45 | AHSG Alpha-2-HS-glycoprotein precursor | n[145]SLGSPSGEVSHPR                          | 3 | 485.2554  | 2.961 | 0.234 |
| 54 | IPI00022431 | 1 | 45.5 | 0.76 | 0.1  | 124 | 45 | AHSG Alpha-2-HS-glycoprotein precursor | n[145]HGPGLIYR                               | 2 | 528.8072  | 2.294 | 0.174 |
| 54 | IPI00022431 | 1 | 45.5 | 0.76 | 0.1  | 124 | 45 | AHSG Alpha-2-HS-glycoprotein precursor | n[145]QIDEVK[272]                            | 2 | 510.3024  | 2.611 | 0.112 |
| 54 | IPI00022431 | 1 | 45.5 | 0.76 | 0.1  | 124 | 45 | AHSG Alpha-2-HS-glycoprotein precursor | VLDPTPVAR                                    | 2 | 554.3297  | 1.829 | 0.23  |
| 54 | IPI00022431 | 1 | 45.5 | 0.76 | 0.1  | 124 | 45 | AHSG Alpha-2-HS-glycoprotein precursor | SPSGEVSHPR                                   | 3 | 398.2072  | 2.538 | 0.084 |
| 54 | IPI00022431 | 1 | 45.5 | 0.76 | 0.1  | 124 | 45 | AHSG Alpha-2-HS-glycoprotein precursor | n[145]GPGLIYR                                | 2 | 460.2777  | 2.404 | 0.051 |
| 54 | IPI00022431 | 1 | 45.5 | 0.76 | 0.1  | 124 | 45 | AHSG Alpha-2-HS-glycoprotein precursor | QIDEVK                                       | 2 | 506.2953  | 2.15  | 0.014 |
| 54 | IPI00022431 | 1 | 45.5 | 0.76 | 0.1  | 124 | 45 | AHSG Alpha-2-HS-glycoprotein precursor | n[145]VLDPTPVAR                              | 2 | 556.3332  | 1.973 | 0.034 |
| 54 | IPI00022431 | 1 | 45.5 | 0.76 | 0.1  | 124 | 45 | AHSG Alpha-2-HS-glycoprotein precursor | HGPGLIYR                                     | 1 | 1052.6    | 1.82  | 0.185 |
| 54 | IPI00022431 | 1 | 45.5 | 0.76 | 0.1  | 124 | 45 | AHSG Alpha-2-HS-glycoprotein precursor | n[145]AALAAF                                 | 1 | 707.4209  | 1.548 | 0.22  |
| 54 | IPI00022431 | 1 | 45.5 | 0.76 | 0.1  | 124 | 45 | AHSG Alpha-2-HS-glycoprotein precursor | AALAAF                                       | 1 | 703.4138  | 1.443 | 0.26  |
| 54 | IPI00022431 | 1 | 45.5 | 0.76 | 0.1  | 124 | 45 | AHSG Alpha-2-HS-glycoprotein precursor | n[145]CDFQLLK[272]                           | 2 | 600.8216  | 1.9   | 0.239 |
| 54 | IPI00022431 | 1 | 45.5 | 0.76 | 0.1  | 124 | 45 | AHSG Alpha-2-HS-glycoprotein precursor | HGPGLIYR                                     | 3 | 351.5382  | 1.976 | 0.065 |
| 54 | IPI00022431 | 1 | 45.5 | 0.76 | 0.1  | 124 | 45 | AHSG Alpha-2-HS-glycoprotein precursor | n[145]SPPDHSVLLAAPPQHQLHR                    | 4 | 544.0491  | 2.259 | 0.007 |
| 55 | IPI00022432 | 1 | 79.6 | 0.86 | 0.21 | 52  | 25 | TTR Transthyretin precursor            | AADDTWEPFASGK                                | 2 | 837.9098  | 4.1   | 0.563 |
| 55 | IPI00022432 | 1 | 79.6 | 0.86 | 0.21 | 52  | 25 | TTR Transthyretin precursor            | GPTGTGESKCPLM[147]VK                         | 2 | 994.0124  | 3.582 | 0.537 |
| 55 | IPI00022432 | 1 | 79.6 | 0.86 | 0.21 | 52  | 25 | TTR Transthyretin precursor            | KAADDTWEPFASGK                               | 2 | 972.0048  | 4.465 | 0.533 |
| 55 | IPI00022432 | 1 | 79.6 | 0.86 | 0.21 | 52  | 25 | TTR Transthyretin precursor            | n[145]AADDTWEPFASGK[272]                     | 2 | 841.9169  | 3.735 | 0.392 |
| 55 | IPI00022432 | 1 | 79.6 | 0.86 | 0.21 | 52  | 25 | TTR Transthyretin precursor            | n[145]GPTGTGESK[272]CPLM[147]VK[272]         | 2 | 1000.023  | 4.571 | 0.45  |
| 55 | IPI00022432 | 1 | 79.6 | 0.86 | 0.21 | 52  | 25 | TTR Transthyretin precursor            | n[145]GSPAINVAHVHFR                          | 2 | 755.9342  | 4.07  | 0.497 |
| 55 | IPI00022432 | 1 | 79.6 | 0.86 | 0.21 | 52  | 25 | TTR Transthyretin precursor            | ALGISPFHEHAIEVFTANDSGPRR                     | 3 | 916.4719  | 5.031 | 0.503 |
| 55 | IPI00022432 | 1 | 79.6 | 0.86 | 0.21 | 52  | 25 | TTR Transthyretin precursor            | TSESGELHGLTTEEEFVEGIYKVEIDTK                 | 3 | 1187.6051 | 6.317 | 0.613 |
| 55 | IPI00022432 | 1 | 79.6 | 0.86 | 0.21 | 52  | 25 | TTR Transthyretin precursor            | n[145]GSPAINVAHVHFR                          | 3 | 504.2919  | 3.978 | 0.206 |
| 55 | IPI00022432 | 1 | 79.6 | 0.86 | 0.21 | 52  | 25 | TTR Transthyretin precursor            | TSESGELHGLTTEEEFVEGIYKVEIDTK                 | 4 | 890.9557  | 3.164 | 0.419 |
| 55 | IPI00022432 | 1 | 79.6 | 0.86 | 0.21 | 52  | 25 | TTR Transthyretin precursor            | n[145]TSESGELHGLTTEEEFVEGIYK[272]VEIDTK[272] | 4 | 893.961   | 7.253 | 0.607 |
| 55 | IPI00022432 | 1 | 79.6 | 0.86 | 0.21 | 52  | 25 | TTR Transthyretin precursor            | YTIAALLSPYSYSTTAVVTNPKE                      | 3 | 923.8285  | 3.401 | 0.389 |
| 55 | IPI00022432 | 1 | 79.6 | 0.86 | 0.21 | 52  | 25 | TTR Transthyretin precursor            | ALGISPFHEHAIEVFTANDSGPR                      | 3 | 864.4382  | 3.595 | 0.283 |
| 55 | IPI00022432 | 1 | 79.6 | 0.86 | 0.21 | 52  | 25 | TTR Transthyretin precursor            | n[145]TSESGELHGLTTEEEFVEGIYK[272]            | 3 | 915.1233  | 3.498 | 0.269 |
| 55 | IPI00022432 | 1 | 79.6 | 0.86 | 0.21 | 52  | 25 | TTR Transthyretin precursor            | GSPAINVAHVHFR                                | 3 | 502.9562  | 2.045 | 0.178 |
| 55 | IPI00022432 | 1 | 79.6 | 0.86 | 0.21 | 52  | 25 | TTR Transthyretin precursor            | GPTGTGESKCPLM[147]VK                         | 3 | 663.0107  | 2.091 | 0.22  |
| 55 | IPI00022432 | 1 | 79.6 | 0.86 | 0.21 | 52  | 25 | TTR Transthyretin precursor            | VIDAVR                                       | 2 | 406.7531  | 1.998 | 0.073 |
| 55 | IPI00022432 | 1 | 79.6 | 0.86 | 0.21 | 52  | 25 | TTR Transthyretin precursor            | GSPAINVAVH                                   | 2 | 552.8117  | 3.385 | 0.393 |
| 55 | IPI00022432 | 1 | 79.6 | 0.86 | 0.21 | 52  | 25 | TTR Transthyretin precursor            | n[145]VEIDTK[272]                            | 2 | 496.797   | 2.05  | 0.094 |
| 55 | IPI00022432 | 1 | 79.6 | 0.86 | 0.21 | 52  | 25 | TTR Transthyretin precursor            | VEIDTK                                       | 2 | 492.7899  | 1.911 | 0.107 |
| 55 | IPI00022432 | 1 | 79.6 | 0.86 | 0.21 | 52  | 25 | TTR Transthyretin precursor            | KAADDTWEPFASGK                               | 3 | 648.3389  | 1.931 | 0.091 |
| 55 | IPI00022432 | 1 | 79.6 | 0.86 | 0.21 | 52  | 25 | TTR Transthyretin precursor            | n[145]ALGISPFH                               | 2 | 493.283   | 2.17  | 0.243 |



|    |             |   |      |      |      |     |    |                                 |                                      |   |           |       |       |
|----|-------------|---|------|------|------|-----|----|---------------------------------|--------------------------------------|---|-----------|-------|-------|
| 55 | IPI00022432 | 1 | 79.6 | 0.86 | 0.21 | 52  | 25 | TTR Transthyretin precursor     | n[145]GPTGTGESK[272]                 | 2 | 561.3057  | 2.193 | 0.216 |
| 55 | IPI00022432 | 1 | 79.6 | 0.86 | 0.21 | 52  | 25 | TTR Transthyretin precursor     | GPTGTGESK                            | 2 | 557.2986  | 1.992 | 0.123 |
| 55 | IPI00022432 | 1 | 79.6 | 0.86 | 0.21 | 52  | 25 | TTR Transthyretin precursor     | GPTGTGESKCPLM[147]VK                 | 4 | 497.5098  | 2.624 | 0.114 |
| 55 | IPI00022432 | 1 | 79.6 | 0.86 | 0.21 | 52  | 25 | TTR Transthyretin precursor     | n[145]GPTGTGESK[272]CPLM[147]VK[272] | 3 | 667.0178  | 2.054 | 0.218 |
| 55 | IPI00022432 | 1 | 79.6 | 0.86 | 0.21 | 52  | 25 | TTR Transthyretin precursor     | n[145]KAADDTWEPFASGK                 | 2 | 974.0083  | 3.349 | 0.309 |
| 55 | IPI00022432 | 1 | 79.6 | 0.86 | 0.21 | 52  | 25 | TTR Transthyretin precursor     | TSSEGLHGLTTEEE                       | 2 | 879.9051  | 2.206 | 0.128 |
| 55 | IPI00022432 | 1 | 79.6 | 0.86 | 0.21 | 52  | 25 | TTR Transthyretin precursor     | n[145]YTIAALLSPYSYSTTAVVTNPK[272]E   | 3 | 926.4999  | 2.011 | 0.058 |
| 56 | IPI00022434 | 1 | 86.3 | 1.24 | 0.15 | ### | ## | ALB Uncharacterized protein ALB | AVMDDFAAFVEK                         | 1 | 1622.8248 | 3.042 | 0.474 |
| 56 | IPI00022434 | 1 | 86.3 | 1.24 | 0.15 | ### | ## | ALB Uncharacterized protein ALB | CCTESLVNR                            | 1 | 1256.5255 | 2.625 | 0.448 |
| 56 | IPI00022434 | 1 | 86.3 | 1.24 | 0.15 | ### | ## | ALB Uncharacterized protein ALB | LVNEVTEFAK                           | 1 | 1429.805  | 3.092 | 0.39  |
| 56 | IPI00022434 | 1 | 86.3 | 1.24 | 0.15 | ### | ## | ALB Uncharacterized protein ALB | NECFLQHK                             | 1 | 1344.6552 | 2.519 | 0.376 |
| 56 | IPI00022434 | 1 | 86.3 | 1.24 | 0.15 | ### | ## | ALB Uncharacterized protein ALB | QTALVELVK                            | 1 | 1280.7937 | 3.011 | 0.382 |
| 56 | IPI00022434 | 1 | 86.3 | 1.24 | 0.15 | ### | ## | ALB Uncharacterized protein ALB | n[145]AVMDDFAAFVEK[272]              | 1 | 1630.839  | 3.256 | 0.514 |
| 56 | IPI00022434 | 1 | 86.3 | 1.24 | 0.15 | ### | ## | ALB Uncharacterized protein ALB | n[145]CCTESLVNR                      | 1 | 1260.5326 | 3.271 | 0.418 |
| 56 | IPI00022434 | 1 | 86.3 | 1.24 | 0.15 | ### | ## | ALB Uncharacterized protein ALB | n[145]DLGEENFK[272]                  | 1 | 1239.646  | 2.184 | 0.264 |
| 56 | IPI00022434 | 1 | 86.3 | 1.24 | 0.15 | ### | ## | ALB Uncharacterized protein ALB | n[145]LVNEVTEFAK[272]                | 1 | 1437.8192 | 3.013 | 0.335 |
| 56 | IPI00022434 | 1 | 86.3 | 1.24 | 0.15 | ### | ## | ALB Uncharacterized protein ALB | AAFTECCQAADK                         | 2 | 815.3483  | 2.069 | 0.216 |
| 56 | IPI00022434 | 1 | 86.3 | 1.24 | 0.15 | ### | ## | ALB Uncharacterized protein ALB | AEFAEVSKLVTDLTK                      | 2 | 1036.0936 | 5.03  | 0.415 |
| 56 | IPI00022434 | 1 | 86.3 | 1.24 | 0.15 | ### | ## | ALB Uncharacterized protein ALB | AQYLQQCPFEDHVK                       | 2 | 1016.4926 | 3.237 | 0.478 |
| 56 | IPI00022434 | 1 | 86.3 | 1.24 | 0.15 | ### | ## | ALB Uncharacterized protein ALB | AVMDDFAAFVEK                         | 2 | 811.916   | 4.232 | 0.482 |
| 56 | IPI00022434 | 1 | 86.3 | 1.24 | 0.15 | ### | ## | ALB Uncharacterized protein ALB | AVM[147]DDFAAFVEK                    | 2 | 819.9135  | 3.653 | 0.402 |
| 56 | IPI00022434 | 1 | 86.3 | 1.24 | 0.15 | ### | ## | ALB Uncharacterized protein ALB | CCAAADPHECYAK                        | 2 | 900.3469  | 4.382 | 0.533 |
| 56 | IPI00022434 | 1 | 86.3 | 1.24 | 0.15 | ### | ## | ALB Uncharacterized protein ALB | CCTESLVNR                            | 2 | 628.7664  | 2.692 | 0.374 |
| 56 | IPI00022434 | 1 | 86.3 | 1.24 | 0.15 | ### | ## | ALB Uncharacterized protein ALB | CTAFHDNEETFLK                        | 2 | 940.9371  | 4.315 | 0.575 |
| 56 | IPI00022434 | 1 | 86.3 | 1.24 | 0.15 | ### | ## | ALB Uncharacterized protein ALB | DVFLGMFLYEYAR                        | 2 | 882.4449  | 4.873 | 0.517 |
| 56 | IPI00022434 | 1 | 86.3 | 1.24 | 0.15 | ### | ## | ALB Uncharacterized protein ALB | DVFLGM[147]FLYEYAR                   | 2 | 890.4424  | 3.239 | 0.403 |
| 56 | IPI00022434 | 1 | 86.3 | 1.24 | 0.15 | ### | ## | ALB Uncharacterized protein ALB | ECCEKPLEK                            | 2 | 852.4212  | 3.598 | 0.364 |
| 56 | IPI00022434 | 1 | 86.3 | 1.24 | 0.15 | ### | ## | ALB Uncharacterized protein ALB | EFNAETFTFHADICTLSEK                  | 2 | 1265.0931 | 5.669 | 0.553 |
| 56 | IPI00022434 | 1 | 86.3 | 1.24 | 0.15 | ### | ## | ALB Uncharacterized protein ALB | ETYGEMADCCAK                         | 2 | 846.8316  | 3.399 | 0.657 |
| 56 | IPI00022434 | 1 | 86.3 | 1.24 | 0.15 | ### | ## | ALB Uncharacterized protein ALB | ETYGEM[147]ADCCAK                    | 2 | 854.829   | 1.631 | 0.208 |
| 56 | IPI00022434 | 1 | 86.3 | 1.24 | 0.15 | ### | ## | ALB Uncharacterized protein ALB | FKDLGEENFK                           | 2 | 823.9487  | 4.224 | 0.364 |
| 56 | IPI00022434 | 1 | 86.3 | 1.24 | 0.15 | ### | ## | ALB Uncharacterized protein ALB | FTECCQAADK                           | 2 | 744.3111  | 4.566 | 0.548 |
| 56 | IPI00022434 | 1 | 86.3 | 1.24 | 0.15 | ### | ## | ALB Uncharacterized protein ALB | FYAPPELLFFAK                         | 2 | 813.4582  | 3.499 | 0.446 |
| 56 | IPI00022434 | 1 | 86.3 | 1.24 | 0.15 | ### | ## | ALB Uncharacterized protein ALB | HPYFYAPPELLFFAK                      | 2 | 1012.0457 | 4.247 | 0.379 |
| 56 | IPI00022434 | 1 | 86.3 | 1.24 | 0.15 | ### | ## | ALB Uncharacterized protein ALB | KQTALVELVK                           | 2 | 774.9955  | 1.955 | 0.065 |
| 56 | IPI00022434 | 1 | 86.3 | 1.24 | 0.15 | ### | ## | ALB Uncharacterized protein ALB | KVPQVSTPTLVEVSR                      | 2 | 960.5675  | 3.012 | 0.399 |
| 56 | IPI00022434 | 1 | 86.3 | 1.24 | 0.15 | ### | ## | ALB Uncharacterized protein ALB | LKECCEKPLEK                          | 2 | 1043.0583 | 4.177 | 0.369 |
| 56 | IPI00022434 | 1 | 86.3 | 1.24 | 0.15 | ### | ## | ALB Uncharacterized protein ALB | LVNEVTEFAK                           | 2 | 715.4061  | 4.868 | 0.392 |
| 56 | IPI00022434 | 1 | 86.3 | 1.24 | 0.15 | ### | ## | ALB Uncharacterized protein ALB | LVRPEVDVMCTAFHDNEETFLK               | 2 | 1460.2137 | 5.861 | 0.564 |
| 56 | IPI00022434 | 1 | 86.3 | 1.24 | 0.15 | ### | ## | ALB Uncharacterized protein ALB | QEPERNECFLQHK                        | 2 | 992.48    | 4.497 | 0.446 |
| 56 | IPI00022434 | 1 | 86.3 | 1.24 | 0.15 | ### | ## | ALB Uncharacterized protein ALB | QNCELFEQLGEYK                        | 2 | 963.9581  | 5.547 | 0.508 |
| 56 | IPI00022434 | 1 | 86.3 | 1.24 | 0.15 | ### | ## | ALB Uncharacterized protein ALB | QTALVELVK                            | 2 | 640.9005  | 3.245 | 0.333 |
| 56 | IPI00022434 | 1 | 86.3 | 1.24 | 0.15 | ### | ## | ALB Uncharacterized protein ALB | RHPDYSVVLRLR                         | 2 | 804.4727  | 2.486 | 0.257 |
| 56 | IPI00022434 | 1 | 86.3 | 1.24 | 0.15 | ### | ## | ALB Uncharacterized protein ALB | RPCFSALEVDETYVVK                     | 2 | 1090.5476 | 2.432 | 0.155 |
| 56 | IPI00022434 | 1 | 86.3 | 1.24 | 0.15 | ### | ## | ALB Uncharacterized protein ALB | SHCIAEVENDEMPADLPSLAADFVESK          | 2 | 1622.254  | 3.891 | 0.671 |
| 56 | IPI00022434 | 1 | 86.3 | 1.24 | 0.15 | ### | ## | ALB Uncharacterized protein ALB | SHCIAEVENDEM[147]PADLPSLAADFVESK     | 2 | 1630.2515 | 5.814 | 0.585 |
| 56 | IPI00022434 | 1 | 86.3 | 1.24 | 0.15 | ### | ## | ALB Uncharacterized protein ALB | TCVADESAENCDK                        | 2 | 878.8541  | 4.785 | 0.6   |
| 56 | IPI00022434 | 1 | 86.3 | 1.24 | 0.15 | ### | ## | ALB Uncharacterized protein ALB | VADESAENCDK                          | 2 | 753.8318  | 3.339 | 0.524 |

|    |             |   |      |      |      |     |    |                                 |                                             |   |           |       |       |
|----|-------------|---|------|------|------|-----|----|---------------------------------|---------------------------------------------|---|-----------|-------|-------|
| 56 | IPI00022434 | 1 | 86.3 | 1.24 | 0.15 | ### | ## | ALB Uncharacterized protein ALB | VFDEFKPLVEEPQNLIK                           | 2 | 1233.1938 | 4.425 | 0.416 |
| 56 | IPI00022434 | 1 | 86.3 | 1.24 | 0.15 | ### | ## | ALB Uncharacterized protein ALB | VMDDFAAFVEK                                 | 2 | 776.3975  | 3.866 | 0.535 |
| 56 | IPI00022434 | 1 | 86.3 | 1.24 | 0.15 | ### | ## | ALB Uncharacterized protein ALB | VPQVSTPTLVEVSR                              | 2 | 826.4725  | 2.141 | 0.242 |
| 56 | IPI00022434 | 1 | 86.3 | 1.24 | 0.15 | ### | ## | ALB Uncharacterized protein ALB | YAPPELLFFAK                                 | 2 | 739.924   | 4.198 | 0.416 |
| 56 | IPI00022434 | 1 | 86.3 | 1.24 | 0.15 | ### | ## | ALB Uncharacterized protein ALB | YFYAPPELLFFAK                               | 2 | 894.9898  | 4.368 | 0.422 |
| 56 | IPI00022434 | 1 | 86.3 | 1.24 | 0.15 | ### | ## | ALB Uncharacterized protein ALB | YICENQDSISSK                                | 2 | 856.9028  | 2.601 | 0.254 |
| 56 | IPI00022434 | 1 | 86.3 | 1.24 | 0.15 | ### | ## | ALB Uncharacterized protein ALB | n[145]AAFTECCQAADK[272]                     | 2 | 819.3554  | 3.908 | 0.54  |
| 56 | IPI00022434 | 1 | 86.3 | 1.24 | 0.15 | ### | ## | ALB Uncharacterized protein ALB | n[145]AQYLQQCPFEDHVK[272]                   | 2 | 1020.4997 | 5.163 | 0.471 |
| 56 | IPI00022434 | 1 | 86.3 | 1.24 | 0.15 | ### | ## | ALB Uncharacterized protein ALB | n[145]AVMDDFAAFVEK[272]                     | 2 | 815.9231  | 5.077 | 0.562 |
| 56 | IPI00022434 | 1 | 86.3 | 1.24 | 0.15 | ### | ## | ALB Uncharacterized protein ALB | n[145]AVM[147]DDFAAFVEK[272]                | 2 | 823.9206  | 2.519 | 0.241 |
| 56 | IPI00022434 | 1 | 86.3 | 1.24 | 0.15 | ### | ## | ALB Uncharacterized protein ALB | n[145]CCAAADPHECYAK[272]                    | 2 | 904.354   | 3.962 | 0.608 |
| 56 | IPI00022434 | 1 | 86.3 | 1.24 | 0.15 | ### | ## | ALB Uncharacterized protein ALB | n[145]CFSALEVDETYVPK[272]                   | 2 | 967.9778  | 3.131 | 0.413 |
| 56 | IPI00022434 | 1 | 86.3 | 1.24 | 0.15 | ### | ## | ALB Uncharacterized protein ALB | n[145]CTAFHDNEETFLK[272]                    | 2 | 944.9442  | 4.593 | 0.483 |
| 56 | IPI00022434 | 1 | 86.3 | 1.24 | 0.15 | ### | ## | ALB Uncharacterized protein ALB | n[145]DESAENC DK[272]                       | 2 | 672.7862  | 2.878 | 0.52  |
| 56 | IPI00022434 | 1 | 86.3 | 1.24 | 0.15 | ### | ## | ALB Uncharacterized protein ALB | n[145]DVFLGM[147]FLYEYAR                    | 2 | 892.4459  | 4.101 | 0.406 |
| 56 | IPI00022434 | 1 | 86.3 | 1.24 | 0.15 | ### | ## | ALB Uncharacterized protein ALB | n[145]EFNAETTFHADICTLSEK[272]               | 2 | 1269.1002 | 5.117 | 0.512 |
| 56 | IPI00022434 | 1 | 86.3 | 1.24 | 0.15 | ### | ## | ALB Uncharacterized protein ALB | n[145]ETYGEMADCCAK[272]                     | 2 | 850.8387  | 4.145 | 0.676 |
| 56 | IPI00022434 | 1 | 86.3 | 1.24 | 0.15 | ### | ## | ALB Uncharacterized protein ALB | n[145]ETYGEM[147]ADCCAK[272]                | 2 | 858.8361  | 2.203 | 0.38  |
| 56 | IPI00022434 | 1 | 86.3 | 1.24 | 0.15 | ### | ## | ALB Uncharacterized protein ALB | n[145]FK[272]DLGEENFK[272]                  | 2 | 829.9594  | 3.295 | 0.302 |
| 56 | IPI00022434 | 1 | 86.3 | 1.24 | 0.15 | ### | ## | ALB Uncharacterized protein ALB | n[145]FTECCQAADK[272]                       | 2 | 748.3182  | 3.483 | 0.5   |
| 56 | IPI00022434 | 1 | 86.3 | 1.24 | 0.15 | ### | ## | ALB Uncharacterized protein ALB | n[145]FYAPPELLFFAK[272]                     | 2 | 817.4653  | 3.968 | 0.405 |
| 56 | IPI00022434 | 1 | 86.3 | 1.24 | 0.15 | ### | ## | ALB Uncharacterized protein ALB | n[145]HPYFYAPPELLFFAK[272]                  | 2 | 1016.0528 | 3.845 | 0.487 |
| 56 | IPI00022434 | 1 | 86.3 | 1.24 | 0.15 | ### | ## | ALB Uncharacterized protein ALB | n[145]LK[272]ECCEK[272]PLLEK[272]           | 2 | 1051.0725 | 3.48  | 0.423 |
| 56 | IPI00022434 | 1 | 86.3 | 1.24 | 0.15 | ### | ## | ALB Uncharacterized protein ALB | n[145]LVNEVTEFAK[272]                       | 2 | 719.4132  | 4.454 | 0.4   |
| 56 | IPI00022434 | 1 | 86.3 | 1.24 | 0.15 | ### | ## | ALB Uncharacterized protein ALB | n[145]QNCELFEQLGEYK[272]                    | 2 | 967.9652  | 6.123 | 0.494 |
| 56 | IPI00022434 | 1 | 86.3 | 1.24 | 0.15 | ### | ## | ALB Uncharacterized protein ALB | n[145]RPCFSALEVDETYVPK[272]                 | 2 | 1094.5547 | 3.134 | 0.28  |
| 56 | IPI00022434 | 1 | 86.3 | 1.24 | 0.15 | ### | ## | ALB Uncharacterized protein ALB | n[145]SALEVDETYVPK[272]                     | 2 | 819.9451  | 4.898 | 0.516 |
| 56 | IPI00022434 | 1 | 86.3 | 1.24 | 0.15 | ### | ## | ALB Uncharacterized protein ALB | n[145]SHCIAEVENDEMPADLPSLAADFVESK[272]      | 2 | 1626.2611 | 5.918 | 0.625 |
| 56 | IPI00022434 | 1 | 86.3 | 1.24 | 0.15 | ### | ## | ALB Uncharacterized protein ALB | n[145]SHCIAEVENDEM[147]PADLPSLAADFVESK[272] | 2 | 1634.2586 | 5.819 | 0.545 |
| 56 | IPI00022434 | 1 | 86.3 | 1.24 | 0.15 | ### | ## | ALB Uncharacterized protein ALB | n[145]TCVADESAENC DK[272]                   | 2 | 882.8612  | 4.845 | 0.584 |
| 56 | IPI00022434 | 1 | 86.3 | 1.24 | 0.15 | ### | ## | ALB Uncharacterized protein ALB | n[145]TFHADICTLSEK[272]                     | 2 | 849.9253  | 4.682 | 0.466 |
| 56 | IPI00022434 | 1 | 86.3 | 1.24 | 0.15 | ### | ## | ALB Uncharacterized protein ALB | n[145]VFDEFK[272]PLVEEPQNLIK[272]           | 2 | 1239.2045 | 4.628 | 0.615 |
| 56 | IPI00022434 | 1 | 86.3 | 1.24 | 0.15 | ### | ## | ALB Uncharacterized protein ALB | n[145]VHTECCCHGDLLECADDR                    | 2 | 1099.4228 | 4.473 | 0.477 |
| 56 | IPI00022434 | 1 | 86.3 | 1.24 | 0.15 | ### | ## | ALB Uncharacterized protein ALB | n[145]VMDDFAAFVEK[272]                      | 2 | 780.4046  | 3.863 | 0.448 |
| 56 | IPI00022434 | 1 | 86.3 | 1.24 | 0.15 | ### | ## | ALB Uncharacterized protein ALB | n[145]YAPPELLFFAK[272]                      | 2 | 743.9311  | 4.088 | 0.354 |
| 56 | IPI00022434 | 1 | 86.3 | 1.24 | 0.15 | ### | ## | ALB Uncharacterized protein ALB | n[145]YFYAPPELLFFAK[272]                    | 2 | 898.9969  | 5.206 | 0.557 |
| 56 | IPI00022434 | 1 | 86.3 | 1.24 | 0.15 | ### | ## | ALB Uncharacterized protein ALB | n[145]YICENQDSISSK[272]                     | 2 | 860.9099  | 4.147 | 0.419 |
| 56 | IPI00022434 | 1 | 86.3 | 1.24 | 0.15 | ### | ## | ALB Uncharacterized protein ALB | AAFTECCQAADK                                | 3 | 543.9013  | 1.207 | 0.066 |
| 56 | IPI00022434 | 1 | 86.3 | 1.24 | 0.15 | ### | ## | ALB Uncharacterized protein ALB | ALVLIAFAQYLQQCPFEDHVK                       | 3 | 920.4852  | 5.27  | 0.568 |
| 56 | IPI00022434 | 1 | 86.3 | 1.24 | 0.15 | ### | ## | ALB Uncharacterized protein ALB | AQYLQQCPFEDHVK                              | 3 | 677.9975  | 2.605 | 0.11  |
| 56 | IPI00022434 | 1 | 86.3 | 1.24 | 0.15 | ### | ## | ALB Uncharacterized protein ALB | CCAAADPHECYAK                               | 3 | 600.567   | 1.828 | 0.544 |
| 56 | IPI00022434 | 1 | 86.3 | 1.24 | 0.15 | ### | ## | ALB Uncharacterized protein ALB | DVFLGM[147]FLYEYAR                          | 3 | 593.964   | 4.771 | 0.383 |
| 56 | IPI00022434 | 1 | 86.3 | 1.24 | 0.15 | ### | ## | ALB Uncharacterized protein ALB | ECCEKPLLEK                                  | 3 | 568.6166  | 2.411 | 0.022 |
| 56 | IPI00022434 | 1 | 86.3 | 1.24 | 0.15 | ### | ## | ALB Uncharacterized protein ALB | EFNAETTFHADICTLSEK                          | 3 | 843.7311  | 6.119 | 0.531 |
| 56 | IPI00022434 | 1 | 86.3 | 1.24 | 0.15 | ### | ## | ALB Uncharacterized protein ALB | EQLKAVMDDFAAFVEK                            | 3 | 754.4048  | 4.63  | 0.535 |
| 56 | IPI00022434 | 1 | 86.3 | 1.24 | 0.15 | ### | ## | ALB Uncharacterized protein ALB | ETYGEM[147]ADCCAK                           | 3 | 570.2218  | 1.468 | 0.213 |
| 56 | IPI00022434 | 1 | 86.3 | 1.24 | 0.15 | ### | ## | ALB Uncharacterized protein ALB | HPDYSVLLLLR                                 | 3 | 484.6172  | 4.46  | 0.223 |
| 56 | IPI00022434 | 1 | 86.3 | 1.24 | 0.15 | ### | ## | ALB Uncharacterized protein ALB | KQATALVELVK                                 | 3 | 516.9994  | 2.132 | 0.056 |

|    |             |   |      |      |      |     |    |                                 |                                             |   |           |       |       |
|----|-------------|---|------|------|------|-----|----|---------------------------------|---------------------------------------------|---|-----------|-------|-------|
| 56 | IPI00022434 | 1 | 86.3 | 1.24 | 0.15 | ### | ## | ALB Uncharacterized protein ALB | KVPQVSTPTLVEVSR                             | 3 | 640.7141  | 2.558 | 0.274 |
| 56 | IPI00022434 | 1 | 86.3 | 1.24 | 0.15 | ### | ## | ALB Uncharacterized protein ALB | KYLYEIAR                                    | 3 | 445.931   | 2.961 | 0.374 |
| 56 | IPI00022434 | 1 | 86.3 | 1.24 | 0.15 | ### | ## | ALB Uncharacterized protein ALB | IAFAQYLQQCPFEDHVK                           | 3 | 788.394   | 5.082 | 0.457 |
| 56 | IPI00022434 | 1 | 86.3 | 1.24 | 0.15 | ### | ## | ALB Uncharacterized protein ALB | LVRPEVDVMCTAFHDNEETFLK                      | 3 | 973.8116  | 6.495 | 0.557 |
| 56 | IPI00022434 | 1 | 86.3 | 1.24 | 0.15 | ### | ## | ALB Uncharacterized protein ALB | LVRPEVDVM[147]CTAFHDNEETFLK                 | 3 | 979.1432  | 4.963 | 0.53  |
| 56 | IPI00022434 | 1 | 86.3 | 1.24 | 0.15 | ### | ## | ALB Uncharacterized protein ALB | M[147]PCAEDYLSVVLNQLCVLHEK                  | 3 | 931.4486  | 4.146 | 0.464 |
| 56 | IPI00022434 | 1 | 86.3 | 1.24 | 0.15 | ### | ## | ALB Uncharacterized protein ALB | NYAEAKDVFGLM[147]FLYEYAR                    | 3 | 866.1017  | 3.73  | 0.399 |
| 56 | IPI00022434 | 1 | 86.3 | 1.24 | 0.15 | ### | ## | ALB Uncharacterized protein ALB | QNCELFEQLGEYK                               | 3 | 642.9745  | 4.592 | 0.454 |
| 56 | IPI00022434 | 1 | 86.3 | 1.24 | 0.15 | ### | ## | ALB Uncharacterized protein ALB | QNCELFEQLGEYKFNALLVR                        | 3 | 956.8227  | 6.205 | 0.436 |
| 56 | IPI00022434 | 1 | 86.3 | 1.24 | 0.15 | ### | ## | ALB Uncharacterized protein ALB | RHPDYSVLLLR                                 | 3 | 536.6509  | 3.13  | 0.426 |
| 56 | IPI00022434 | 1 | 86.3 | 1.24 | 0.15 | ### | ## | ALB Uncharacterized protein ALB | RHPYFYAPELFFAK                              | 3 | 727.0666  | 4.331 | 0.5   |
| 56 | IPI00022434 | 1 | 86.3 | 1.24 | 0.15 | ### | ## | ALB Uncharacterized protein ALB | RPCFSALEVDETYVPK                            | 3 | 727.3675  | 2.281 | 0.089 |
| 56 | IPI00022434 | 1 | 86.3 | 1.24 | 0.15 | ### | ## | ALB Uncharacterized protein ALB | SHCIAEVENDEMPADLPSLAADFVESK                 | 3 | 1081.8384 | 2.275 | 0.297 |
| 56 | IPI00022434 | 1 | 86.3 | 1.24 | 0.15 | ### | ## | ALB Uncharacterized protein ALB | SHCIAEVENDEM[147]PADLPSLAADFVESK            | 3 | 1087.1701 | 5.633 | 0.535 |
| 56 | IPI00022434 | 1 | 86.3 | 1.24 | 0.15 | ### | ## | ALB Uncharacterized protein ALB | TCVADESAENC DK                              | 3 | 586.2385  | 4.238 | 0.53  |
| 56 | IPI00022434 | 1 | 86.3 | 1.24 | 0.15 | ### | ## | ALB Uncharacterized protein ALB | VFDEFKPLVEEPQNLIK                           | 3 | 822.465   | 3.958 | 0.183 |
| 56 | IPI00022434 | 1 | 86.3 | 1.24 | 0.15 | ### | ## | ALB Uncharacterized protein ALB | VHTECCHGDLLCADDRADLAK                       | 3 | 944.7403  | 5.455 | 0.574 |
| 56 | IPI00022434 | 1 | 86.3 | 1.24 | 0.15 | ### | ## | ALB Uncharacterized protein ALB | YKAAFTECCQAADK                              | 3 | 687.6524  | 3.168 | 0.481 |
| 56 | IPI00022434 | 1 | 86.3 | 1.24 | 0.15 | ### | ## | ALB Uncharacterized protein ALB | YTKKVPQVSTPTLVEVSR                          | 3 | 818.1477  | 3.654 | 0.486 |
| 56 | IPI00022434 | 1 | 86.3 | 1.24 | 0.15 | ### | ## | ALB Uncharacterized protein ALB | n[145]AAFTECCQAADK[272]                     | 3 | 546.5727  | 1.799 | 0.174 |
| 56 | IPI00022434 | 1 | 86.3 | 1.24 | 0.15 | ### | ## | ALB Uncharacterized protein ALB | n[145]AQYLQQCPFEDHVK[272]                   | 3 | 680.6689  | 2.602 | 0.207 |
| 56 | IPI00022434 | 1 | 86.3 | 1.24 | 0.15 | ### | ## | ALB Uncharacterized protein ALB | n[145]CTAFHDNEETFLK[272]K[272]              | 3 | 721.0309  | 4.607 | 0.327 |
| 56 | IPI00022434 | 1 | 86.3 | 1.24 | 0.15 | ### | ## | ALB Uncharacterized protein ALB | n[145]ECCEK[272]P LLEK[272]                 | 3 | 572.6237  | 3.05  | 0.401 |
| 56 | IPI00022434 | 1 | 86.3 | 1.24 | 0.15 | ### | ## | ALB Uncharacterized protein ALB | n[145]EFNAETFTFHADICTLSEK[272]              | 3 | 846.4025  | 4.348 | 0.45  |
| 56 | IPI00022434 | 1 | 86.3 | 1.24 | 0.15 | ### | ## | ALB Uncharacterized protein ALB | n[145]LVRPEVDVMCTAFHDNEETFLK[272]           | 3 | 976.483   | 7.422 | 0.535 |
| 56 | IPI00022434 | 1 | 86.3 | 1.24 | 0.15 | ### | ## | ALB Uncharacterized protein ALB | n[145]LVRPEVDVM[147]CTAFHDNEETFLK[272]      | 3 | 981.8146  | 4.687 | 0.311 |
| 56 | IPI00022434 | 1 | 86.3 | 1.24 | 0.15 | ### | ## | ALB Uncharacterized protein ALB | n[145]NYAEAK[272]DVFLGM[147]FLYEYAR         | 3 | 868.7731  | 4.042 | 0.489 |
| 56 | IPI00022434 | 1 | 86.3 | 1.24 | 0.15 | ### | ## | ALB Uncharacterized protein ALB | n[145]QEPERNECF LQHK[272]                   | 3 | 664.6605  | 4.934 | 0.356 |
| 56 | IPI00022434 | 1 | 86.3 | 1.24 | 0.15 | ### | ## | ALB Uncharacterized protein ALB | n[145]QNCELFEQLGEYK[272]FNALLVR             | 3 | 959.4941  | 6.254 | 0.475 |
| 56 | IPI00022434 | 1 | 86.3 | 1.24 | 0.15 | ### | ## | ALB Uncharacterized protein ALB | n[145]RHPDYSVLLLR                           | 3 | 537.9866  | 3.686 | 0.399 |
| 56 | IPI00022434 | 1 | 86.3 | 1.24 | 0.15 | ### | ## | ALB Uncharacterized protein ALB | n[145]RHPYFYAPELFFAK[272]                   | 3 | 729.738   | 5.019 | 0.381 |
| 56 | IPI00022434 | 1 | 86.3 | 1.24 | 0.15 | ### | ## | ALB Uncharacterized protein ALB | n[145]RPCFSALEVDETYVPK[272]                 | 3 | 730.0389  | 3.259 | 0.461 |
| 56 | IPI00022434 | 1 | 86.3 | 1.24 | 0.15 | ### | ## | ALB Uncharacterized protein ALB | n[145]SHCIAEVENDEMPADLPSLAADFVESK[272]      | 3 | 1084.5098 | 7.996 | 0.658 |
| 56 | IPI00022434 | 1 | 86.3 | 1.24 | 0.15 | ### | ## | ALB Uncharacterized protein ALB | n[145]SHCIAEVENDEM[147]PADLPSLAADFVESK[272] | 3 | 1089.8415 | 5.796 | 0.4   |
| 56 | IPI00022434 | 1 | 86.3 | 1.24 | 0.15 | ### | ## | ALB Uncharacterized protein ALB | n[145]TCVADESAENC DK[272]                   | 3 | 588.9099  | 4.151 | 0.356 |
| 56 | IPI00022434 | 1 | 86.3 | 1.24 | 0.15 | ### | ## | ALB Uncharacterized protein ALB | n[145]VFDEFK[272]PLVEEPQNLIK[272]           | 3 | 826.4721  | 3.616 | 0.354 |
| 56 | IPI00022434 | 1 | 86.3 | 1.24 | 0.15 | ### | ## | ALB Uncharacterized protein ALB | n[145]VHTECCHGDLLCADDR                      | 3 | 733.2843  | 4.329 | 0.503 |
| 56 | IPI00022434 | 1 | 86.3 | 1.24 | 0.15 | ### | ## | ALB Uncharacterized protein ALB | n[145]VHTECCHGDLLCADDRADLAK[272]            | 3 | 947.4117  | 6.649 | 0.593 |
| 56 | IPI00022434 | 1 | 86.3 | 1.24 | 0.15 | ### | ## | ALB Uncharacterized protein ALB | n[145]YK[272]AAFTECCQAADK[272]              | 3 | 691.6595  | 3.515 | 0.316 |
| 56 | IPI00022434 | 1 | 86.3 | 1.24 | 0.15 | ### | ## | ALB Uncharacterized protein ALB | ALVLIAFAQYLQQCPFEDHVK                       | 4 | 690.6158  | 2.951 | 0.38  |
| 56 | IPI00022434 | 1 | 86.3 | 1.24 | 0.15 | ### | ## | ALB Uncharacterized protein ALB | EFNAETFTFHADICTLSEKER                       | 4 | 704.3361  | 4.472 | 0.499 |
| 56 | IPI00022434 | 1 | 86.3 | 1.24 | 0.15 | ### | ## | ALB Uncharacterized protein ALB | LVRPEVDVMCTAFHDNEETFLK                      | 4 | 730.6105  | 5.399 | 0.465 |
| 56 | IPI00022434 | 1 | 86.3 | 1.24 | 0.15 | ### | ## | ALB Uncharacterized protein ALB | LVRPEVDVM[147]CTAFHDNEETFLK                 | 4 | 734.6093  | 1.991 | 0.144 |
| 56 | IPI00022434 | 1 | 86.3 | 1.24 | 0.15 | ### | ## | ALB Uncharacterized protein ALB | LVRPEVDVM[147]CTAFHDNEETFLKK                | 4 | 801.6567  | 4.966 | 0.439 |
| 56 | IPI00022434 | 1 | 86.3 | 1.24 | 0.15 | ### | ## | ALB Uncharacterized protein ALB | QEPERNECF LQHK                              | 4 | 496.7437  | 2.783 | 0.271 |
| 56 | IPI00022434 | 1 | 86.3 | 1.24 | 0.15 | ### | ## | ALB Uncharacterized protein ALB | QNCELFEQLGEYKFNALLVR                        | 4 | 717.8689  | 3.507 | 0.452 |
| 56 | IPI00022434 | 1 | 86.3 | 1.24 | 0.15 | ### | ## | ALB Uncharacterized protein ALB | SHCIAEVENDEMPADLPSLAADFVESK                 | 4 | 811.6306  | 3.096 | 0.301 |
| 56 | IPI00022434 | 1 | 86.3 | 1.24 | 0.15 | ### | ## | ALB Uncharacterized protein ALB | SHCIAEVENDEM[147]PADLPSLAADFVESK            | 4 | 815.6294  | 4.946 | 0.539 |

|    |             |   |      |      |      |     |    |                                 |                                              |   |          |       |       |
|----|-------------|---|------|------|------|-----|----|---------------------------------|----------------------------------------------|---|----------|-------|-------|
| 56 | IPI00022434 | 1 | 86.3 | 1.24 | 0.15 | ### | ## | ALB Uncharacterized protein ALB | VHTECCHGDLLECADDRADLAK                       | 4 | 708.8071 | 3.73  | 0.44  |
| 56 | IPI00022434 | 1 | 86.3 | 1.24 | 0.15 | ### | ## | ALB Uncharacterized protein ALB | n[145]LVRPEVDVMCTAFHDNEETFLK[272]K[272]      | 4 | 800.6633 | 4.932 | 0.272 |
| 56 | IPI00022434 | 1 | 86.3 | 1.24 | 0.15 | ### | ## | ALB Uncharacterized protein ALB | n[145]VHTECCHGDLLECADDR                      | 4 | 550.2151 | 3.004 | 0.429 |
| 56 | IPI00022434 | 1 | 86.3 | 1.24 | 0.15 | ### | ## | ALB Uncharacterized protein ALB | n[145]VHTECCHGDLLECADDRADLAK[272]            | 4 | 710.8106 | 5.761 | 0.541 |
| 56 | IPI00022434 | 1 | 86.3 | 1.24 | 0.15 | ### | ## | ALB Uncharacterized protein ALB | LVRPEVDVMCTAFHDNEETFLKK                      | 5 | 638.3279 | 3.736 | 0.354 |
| 56 | IPI00022434 | 1 | 86.3 | 1.24 | 0.15 | ### | ## | ALB Uncharacterized protein ALB | n[145]LVRPEVDVMCTAFHDNEETFLK[272]K[272]      | 5 | 640.7321 | 5.021 | 0.523 |
| 56 | IPI00022434 | 1 | 86.3 | 1.24 | 0.15 | ### | ## | ALB Uncharacterized protein ALB | n[145]LVRPEVDVM[147]CTAFHDNEETFLK[272]K[272] | 5 | 643.9311 | 2.574 | 0.336 |
| 56 | IPI00022434 | 1 | 86.3 | 1.24 | 0.15 | ### | ## | ALB Uncharacterized protein ALB | n[145]VHTECCHGDLLECADDRADLAK[272]            | 5 | 568.85   | 3.839 | 0.306 |
| 56 | IPI00022434 | 1 | 86.3 | 1.24 | 0.15 | ### | ## | ALB Uncharacterized protein ALB | LAKTYETTLEK                                  | 3 | 573.0014 | 2.364 | 0.105 |
| 56 | IPI00022434 | 1 | 86.3 | 1.24 | 0.15 | ### | ## | ALB Uncharacterized protein ALB | LKCASLQKFGER                                 | 3 | 616.0112 | 3.933 | 0.302 |
| 56 | IPI00022434 | 1 | 86.3 | 1.24 | 0.15 | ### | ## | ALB Uncharacterized protein ALB | NECFLQHK                                     | 3 | 448.8899 | 3.032 | 0.182 |
| 56 | IPI00022434 | 1 | 86.3 | 1.24 | 0.15 | ### | ## | ALB Uncharacterized protein ALB | QEPERNECFLQHK                                | 3 | 661.9891 | 4.448 | 0.354 |
| 56 | IPI00022434 | 1 | 86.3 | 1.24 | 0.15 | ### | ## | ALB Uncharacterized protein ALB | n[145]AVM[147]DDFAAFVEK[272]                 | 3 | 549.6161 | 3.658 | 0.258 |
| 56 | IPI00022434 | 1 | 86.3 | 1.24 | 0.15 | ### | ## | ALB Uncharacterized protein ALB | n[145]ETYGEM[147]ADCCAK[272]                 | 3 | 572.8932 | 3.334 | 0.451 |
| 56 | IPI00022434 | 1 | 86.3 | 1.24 | 0.15 | ### | ## | ALB Uncharacterized protein ALB | n[145]HPYFYAPELLFFAK[272]                    | 3 | 677.7043 | 4.079 | 0.347 |
| 56 | IPI00022434 | 1 | 86.3 | 1.24 | 0.15 | ### | ## | ALB Uncharacterized protein ALB | n[145]LDELDEGK[272]ASSAK[272]                | 3 | 651.0322 | 3.303 | 0.443 |
| 56 | IPI00022434 | 1 | 86.3 | 1.24 | 0.15 | ### | ## | ALB Uncharacterized protein ALB | n[145]LK[272]CASLQK[272]FGER                 | 3 | 620.0183 | 3.054 | 0.254 |
| 56 | IPI00022434 | 1 | 86.3 | 1.24 | 0.15 | ### | ## | ALB Uncharacterized protein ALB | n[145]NECFLQHK[272]                          | 3 | 451.5613 | 2.729 | 0.117 |
| 56 | IPI00022434 | 1 | 86.3 | 1.24 | 0.15 | ### | ## | ALB Uncharacterized protein ALB | EFNAETTFHADICTLSEK                           | 4 | 633.0502 | 3.09  | 0.345 |
| 56 | IPI00022434 | 1 | 86.3 | 1.24 | 0.15 | ### | ## | ALB Uncharacterized protein ALB | LVRPEVDVMCTAFHDNEETFLKK                      | 4 | 797.658  | 3.994 | 0.248 |
| 56 | IPI00022434 | 1 | 86.3 | 1.24 | 0.15 | ### | ## | ALB Uncharacterized protein ALB | VHTECCHGDLLECADDR                            | 4 | 549.2133 | 2.574 | 0.361 |
| 56 | IPI00022434 | 1 | 86.3 | 1.24 | 0.15 | ### | ## | ALB Uncharacterized protein ALB | n[145]EFNAETTFHADICTLSEK[272]ER              | 4 | 706.3397 | 4.762 | 0.415 |
| 56 | IPI00022434 | 1 | 86.3 | 1.24 | 0.15 | ### | ## | ALB Uncharacterized protein ALB | n[145]LK[272]ECCEK[272]PLLEK[272]            | 4 | 526.0399 | 1.968 | 0.02  |
| 56 | IPI00022434 | 1 | 86.3 | 1.24 | 0.15 | ### | ## | ALB Uncharacterized protein ALB | n[145]LVRPEVDVMCTAFHDNEETFLK[272]            | 4 | 732.6141 | 4.143 | 0.3   |
| 56 | IPI00022434 | 1 | 86.3 | 1.24 | 0.15 | ### | ## | ALB Uncharacterized protein ALB | n[145]LVRPEVDVM[147]CTAFHDNEETFLK[272]       | 4 | 736.6128 | 3.297 | 0.092 |
| 56 | IPI00022434 | 1 | 86.3 | 1.24 | 0.15 | ### | ## | ALB Uncharacterized protein ALB | n[145]QNCLEFQLGEYK[272]FQNALLVR              | 4 | 719.8724 | 3.54  | 0.338 |
| 56 | IPI00022434 | 1 | 86.3 | 1.24 | 0.15 | ### | ## | ALB Uncharacterized protein ALB | DLGEENFK                                     | 2 | 616.3195 | 3.99  | 0.311 |
| 56 | IPI00022434 | 1 | 86.3 | 1.24 | 0.15 | ### | ## | ALB Uncharacterized protein ALB | NECFLQHK                                     | 2 | 672.8312 | 3.2   | 0.346 |
| 56 | IPI00022434 | 1 | 86.3 | 1.24 | 0.15 | ### | ## | ALB Uncharacterized protein ALB | n[145]CCTESLVNR                              | 2 | 630.7699 | 3.019 | 0.386 |
| 56 | IPI00022434 | 1 | 86.3 | 1.24 | 0.15 | ### | ## | ALB Uncharacterized protein ALB | n[145]DVFLGMFLYEYAR                          | 2 | 884.4485 | 4.101 | 0.345 |
| 56 | IPI00022434 | 1 | 86.3 | 1.24 | 0.15 | ### | ## | ALB Uncharacterized protein ALB | n[145]ECCEK[272]PLLEK[272]                   | 2 | 858.4319 | 3.685 | 0.382 |
| 56 | IPI00022434 | 1 | 86.3 | 1.24 | 0.15 | ### | ## | ALB Uncharacterized protein ALB | n[145]NECFLQHK[272]                          | 2 | 676.8383 | 3.339 | 0.377 |
| 56 | IPI00022434 | 1 | 86.3 | 1.24 | 0.15 | ### | ## | ALB Uncharacterized protein ALB | n[145]QTALVELVK[272]                         | 2 | 644.9076 | 2.689 | 0.235 |
| 56 | IPI00022434 | 1 | 86.3 | 1.24 | 0.15 | ### | ## | ALB Uncharacterized protein ALB | CTAFHDNEETFLKK                               | 3 | 717.0238 | 5.044 | 0.342 |
| 56 | IPI00022434 | 1 | 86.3 | 1.24 | 0.15 | ### | ## | ALB Uncharacterized protein ALB | FKDLGEENFK                                   | 3 | 549.6349 | 2.533 | 0.039 |
| 56 | IPI00022434 | 1 | 86.3 | 1.24 | 0.15 | ### | ## | ALB Uncharacterized protein ALB | LKECCEKPLLEK                                 | 3 | 695.7079 | 2.544 | 0.045 |
| 56 | IPI00022434 | 1 | 86.3 | 1.24 | 0.15 | ### | ## | ALB Uncharacterized protein ALB | n[145]AVMDDFAAFVEK[272]                      | 3 | 544.2845 | 2.876 | 0.262 |
| 56 | IPI00022434 | 1 | 86.3 | 1.24 | 0.15 | ### | ## | ALB Uncharacterized protein ALB | n[145]CCAAADPHECYAK[272]                     | 3 | 603.2384 | 1.305 | 0.465 |
| 56 | IPI00022434 | 1 | 86.3 | 1.24 | 0.15 | ### | ## | ALB Uncharacterized protein ALB | n[145]FK[272]DLGEENFK[272]                   | 3 | 553.642  | 3.066 | 0.319 |
| 56 | IPI00022434 | 1 | 86.3 | 1.24 | 0.15 | ### | ## | ALB Uncharacterized protein ALB | LKCASLQKFGER                                 | 4 | 462.2602 | 2.724 | 0.294 |
| 56 | IPI00022434 | 1 | 86.3 | 1.24 | 0.15 | ### | ## | ALB Uncharacterized protein ALB | RPCFSALEVDETYVPK                             | 4 | 545.7774 | 2.102 | 0.112 |
| 56 | IPI00022434 | 1 | 86.3 | 1.24 | 0.15 | ### | ## | ALB Uncharacterized protein ALB | n[145]SHCIAEVENDEM[147]PADLPSLAADFVESK[272]  | 4 | 817.6329 | 3.175 | 0.251 |
| 56 | IPI00022434 | 1 | 86.3 | 1.24 | 0.15 | ### | ## | ALB Uncharacterized protein ALB | n[145]VFDEFK[272]PLVEEPQNLIK[272]            | 4 | 620.1059 | 1.885 | 0.106 |
| 56 | IPI00022434 | 1 | 86.3 | 1.24 | 0.15 | ### | ## | ALB Uncharacterized protein ALB | LCTVATLR                                     | 2 | 531.7936 | 2.833 | 0.272 |
| 56 | IPI00022434 | 1 | 86.3 | 1.24 | 0.15 | ### | ## | ALB Uncharacterized protein ALB | TYETTLEK                                     | 2 | 632.8428 | 3.339 | 0.314 |
| 56 | IPI00022434 | 1 | 86.3 | 1.24 | 0.15 | ### | ## | ALB Uncharacterized protein ALB | n[145]DLGEENFK[272]                          | 2 | 620.3266 | 3.623 | 0.314 |
| 56 | IPI00022434 | 1 | 86.3 | 1.24 | 0.15 | ### | ## | ALB Uncharacterized protein ALB | n[145]DVCK[272]NYAEAK[272]                   | 3 | 540.2813 | 2.755 | 0.117 |
| 56 | IPI00022434 | 1 | 86.3 | 1.24 | 0.15 | ### | ## | ALB Uncharacterized protein ALB | n[145]LK[272]ECCEK[272]PLLEK[272]            | 3 | 701.0507 | 2.656 | 0.014 |

|    |             |   |      |      |      |     |    |                                 |                                |   |           |       |       |
|----|-------------|---|------|------|------|-----|----|---------------------------------|--------------------------------|---|-----------|-------|-------|
| 56 | IPI00022434 | 1 | 86.3 | 1.24 | 0.15 | ### | ## | ALB Uncharacterized protein ALB | n[145]YICENQDSISSK[272]        | 3 | 574.2757  | 1.853 | 0.09  |
| 56 | IPI00022434 | 1 | 86.3 | 1.24 | 0.15 | ### | ## | ALB Uncharacterized protein ALB | n[145]QEPERNECFLQHK[272]       | 4 | 498.7472  | 3.49  | 0.26  |
| 56 | IPI00022434 | 1 | 86.3 | 1.24 | 0.15 | ### | ## | ALB Uncharacterized protein ALB | DLGEENFK                       | 1 | 1231.6318 | 2.658 | 0.335 |
| 56 | IPI00022434 | 1 | 86.3 | 1.24 | 0.15 | ### | ## | ALB Uncharacterized protein ALB | TYETTLEK                       | 1 | 1264.6784 | 2.28  | 0.288 |
| 56 | IPI00022434 | 1 | 86.3 | 1.24 | 0.15 | ### | ## | ALB Uncharacterized protein ALB | n[145]TYETTLEK[272]            | 1 | 1272.6926 | 2.407 | 0.304 |
| 56 | IPI00022434 | 1 | 86.3 | 1.24 | 0.15 | ### | ## | ALB Uncharacterized protein ALB | DDPNLPR                        | 2 | 540.7753  | 2.883 | 0.316 |
| 56 | IPI00022434 | 1 | 86.3 | 1.24 | 0.15 | ### | ## | ALB Uncharacterized protein ALB | KYLYEIAR                       | 2 | 668.3928  | 2.621 | 0.313 |
| 56 | IPI00022434 | 1 | 86.3 | 1.24 | 0.15 | ### | ## | ALB Uncharacterized protein ALB | n[145]LCTVATLR                 | 2 | 533.7971  | 2.812 | 0.346 |
| 56 | IPI00022434 | 1 | 86.3 | 1.24 | 0.15 | ### | ## | ALB Uncharacterized protein ALB | AVM[147]DDFAAFVEK              | 3 | 546.9447  | 2.642 | 0.096 |
| 56 | IPI00022434 | 1 | 86.3 | 1.24 | 0.15 | ### | ## | ALB Uncharacterized protein ALB | HPDYSVLLLLR                    | 2 | 726.4221  | 2.285 | 0.424 |
| 56 | IPI00022434 | 1 | 86.3 | 1.24 | 0.15 | ### | ## | ALB Uncharacterized protein ALB | n[145]TYETTLEK[272]            | 2 | 636.8499  | 2.648 | 0.227 |
| 56 | IPI00022434 | 1 | 86.3 | 1.24 | 0.15 | ### | ## | ALB Uncharacterized protein ALB | YICENQDSISSK                   | 3 | 571.6043  | 1.796 | 0.035 |
| 56 | IPI00022434 | 1 | 86.3 | 1.24 | 0.15 | ### | ## | ALB Uncharacterized protein ALB | AEFAEVSK                       | 1 | 1160.6311 | 2.481 | 0.066 |
| 56 | IPI00022434 | 1 | 86.3 | 1.24 | 0.15 | ### | ## | ALB Uncharacterized protein ALB | n[145]AEFAEVSK[272]            | 1 | 1168.6453 | 2.905 | 0.048 |
| 56 | IPI00022434 | 1 | 86.3 | 1.24 | 0.15 | ### | ## | ALB Uncharacterized protein ALB | n[145]DDPNLPR                  | 1 | 1084.5504 | 2.2   | 0.299 |
| 56 | IPI00022434 | 1 | 86.3 | 1.24 | 0.15 | ### | ## | ALB Uncharacterized protein ALB | YLYEIAR                        | 2 | 534.2979  | 2.505 | 0.117 |
| 56 | IPI00022434 | 1 | 86.3 | 1.24 | 0.15 | ### | ## | ALB Uncharacterized protein ALB | DDPNLPR                        | 1 | 1080.5433 | 1.91  | 0.311 |
| 56 | IPI00022434 | 1 | 86.3 | 1.24 | 0.15 | ### | ## | ALB Uncharacterized protein ALB | YLYEIAR                        | 1 | 1067.5885 | 2.485 | 0.127 |
| 56 | IPI00022434 | 1 | 86.3 | 1.24 | 0.15 | ### | ## | ALB Uncharacterized protein ALB | n[145]YLYEIAR                  | 1 | 1071.5956 | 2.423 | 0.119 |
| 56 | IPI00022434 | 1 | 86.3 | 1.24 | 0.15 | ### | ## | ALB Uncharacterized protein ALB | LKECCEKPLLEK                   | 4 | 522.0328  | 2.602 | 0.226 |
| 56 | IPI00022434 | 1 | 86.3 | 1.24 | 0.15 | ### | ## | ALB Uncharacterized protein ALB | n[145]LK[272]CASLQK[272]FGER   | 4 | 465.2656  | 2.234 | 0.231 |
| 56 | IPI00022434 | 1 | 86.3 | 1.24 | 0.15 | ### | ## | ALB Uncharacterized protein ALB | SIHTLFGDK                      | 1 | 1297.7264 | 2.868 | 0.274 |
| 56 | IPI00022434 | 1 | 86.3 | 1.24 | 0.15 | ### | ## | ALB Uncharacterized protein ALB | n[145]LDELRDEGK[272]           | 1 | 1362.7468 | 2.185 | 0.271 |
| 56 | IPI00022434 | 1 | 86.3 | 1.24 | 0.15 | ### | ## | ALB Uncharacterized protein ALB | n[145]SLHTLFGDK[272]           | 1 | 1305.7406 | 3.102 | 0.266 |
| 56 | IPI00022434 | 1 | 86.3 | 1.24 | 0.15 | ### | ## | ALB Uncharacterized protein ALB | n[145]DDPNLPR                  | 2 | 542.7788  | 2.281 | 0.19  |
| 56 | IPI00022434 | 1 | 86.3 | 1.24 | 0.15 | ### | ## | ALB Uncharacterized protein ALB | AEFAEVSK                       | 2 | 580.8192  | 2.656 | 0.032 |
| 56 | IPI00022434 | 1 | 86.3 | 1.24 | 0.15 | ### | ## | ALB Uncharacterized protein ALB | n[145]LVTDLTK[272]             | 2 | 539.3416  | 1.491 | 0.104 |
| 56 | IPI00022434 | 1 | 86.3 | 1.24 | 0.15 | ### | ## | ALB Uncharacterized protein ALB | LDELRDEGK                      | 1 | 1354.7326 | 2.427 | 0.225 |
| 56 | IPI00022434 | 1 | 86.3 | 1.24 | 0.15 | ### | ## | ALB Uncharacterized protein ALB | LVTDLTK                        | 1 | 1069.6617 | 2.119 | 0.085 |
| 56 | IPI00022434 | 1 | 86.3 | 1.24 | 0.15 | ### | ## | ALB Uncharacterized protein ALB | LVTDLTK                        | 2 | 535.3345  | 2.415 | 0.102 |
| 56 | IPI00022434 | 1 | 86.3 | 1.24 | 0.15 | ### | ## | ALB Uncharacterized protein ALB | n[145]AEFAEVSK[272]            | 2 | 584.8263  | 3.664 | 0.07  |
| 56 | IPI00022434 | 1 | 86.3 | 1.24 | 0.15 | ### | ## | ALB Uncharacterized protein ALB | LAKTYETTLEK                    | 2 | 858.9984  | 3.58  | 0.386 |
| 56 | IPI00022434 | 1 | 86.3 | 1.24 | 0.15 | ### | ## | ALB Uncharacterized protein ALB | n[145]LVTDLTK[272]             | 1 | 1077.6759 | 1.923 | 0.042 |
| 56 | IPI00022434 | 1 | 86.3 | 1.24 | 0.15 | ### | ## | ALB Uncharacterized protein ALB | n[145]AACLLPK[272]             | 2 | 525.3081  | 2.062 | 0.084 |
| 56 | IPI00022434 | 1 | 86.3 | 1.24 | 0.15 | ### | ## | ALB Uncharacterized protein ALB | AACLLPK                        | 2 | 521.301   | 2.231 | 0.104 |
| 56 | IPI00022434 | 1 | 86.3 | 1.24 | 0.15 | ### | ## | ALB Uncharacterized protein ALB | n[145]QEPERNECFLQHK[272]       | 2 | 996.4871  | 4.303 | 0.369 |
| 56 | IPI00022434 | 1 | 86.3 | 1.24 | 0.15 | ### | ## | ALB Uncharacterized protein ALB | EFNAETFTFHADICTLSEKER          | 3 | 938.779   | 3.567 | 0.34  |
| 56 | IPI00022434 | 1 | 86.3 | 1.24 | 0.15 | ### | ## | ALB Uncharacterized protein ALB | n[145]CTAFHDNEETFLK[272]K[272] | 4 | 541.025   | 3.211 | 0.334 |
| 56 | IPI00022434 | 1 | 86.3 | 1.24 | 0.15 | ### | ## | ALB Uncharacterized protein ALB | FQNALIVR                       | 2 | 550.8324  | 3.137 | 0.218 |
| 56 | IPI00022434 | 1 | 86.3 | 1.24 | 0.15 | ### | ## | ALB Uncharacterized protein ALB | n[145]EPERNECFLQHK[272]        | 3 | 621.9743  | 3.874 | 0.365 |
| 56 | IPI00022434 | 1 | 86.3 | 1.24 | 0.15 | ### | ## | ALB Uncharacterized protein ALB | NECFLQHKDDPNLPR                | 4 | 567.2769  | 3.025 | 0.197 |
| 56 | IPI00022434 | 1 | 86.3 | 1.24 | 0.15 | ### | ## | ALB Uncharacterized protein ALB | KDLGEENFK                      | 3 | 500.6121  | 3.852 | 0.332 |
| 56 | IPI00022434 | 1 | 86.3 | 1.24 | 0.15 | ### | ## | ALB Uncharacterized protein ALB | n[145]YLYEIAR                  | 2 | 536.3014  | 1.823 | 0.031 |
| 56 | IPI00022434 | 1 | 86.3 | 1.24 | 0.15 | ### | ## | ALB Uncharacterized protein ALB | n[145]LAK[272]TYETTLEK[272]    | 2 | 865.0091  | 3.883 | 0.323 |
| 56 | IPI00022434 | 1 | 86.3 | 1.24 | 0.15 | ### | ## | ALB Uncharacterized protein ALB | n[145]LCTVATLR                 | 1 | 1066.587  | 1.901 | 0.165 |
| 56 | IPI00022434 | 1 | 86.3 | 1.24 | 0.15 | ### | ## | ALB Uncharacterized protein ALB | n[145]SIHTLFGDK[272]           | 2 | 653.3739  | 1.949 | 0.197 |
| 56 | IPI00022434 | 1 | 86.3 | 1.24 | 0.15 | ### | ## | ALB Uncharacterized protein ALB | YTKKVPQVSTPTLVEVSR             | 4 | 613.8626  | 2.907 | 0.272 |
| 56 | IPI00022434 | 1 | 86.3 | 1.24 | 0.15 | ### | ## | ALB Uncharacterized protein ALB | SIHTLFGDK                      | 2 | 649.3668  | 3.473 | 0.235 |

|    |             |   |      |      |      |     |    |                                 |                                 |   |           |       |       |
|----|-------------|---|------|------|------|-----|----|---------------------------------|---------------------------------|---|-----------|-------|-------|
| 56 | IPI00022434 | 1 | 86.3 | 1.24 | 0.15 | ### | ## | ALB Uncharacterized protein ALB | VHTECCHGD                       | 3 | 411.482   | 2.073 | 0.398 |
| 56 | IPI00022434 | 1 | 86.3 | 1.24 | 0.15 | ### | ## | ALB Uncharacterized protein ALB | AEFAEVSKLVTDLTK                 | 3 | 691.0648  | 2.985 | 0.265 |
| 56 | IPI00022434 | 1 | 86.3 | 1.24 | 0.15 | ### | ## | ALB Uncharacterized protein ALB | LDELRDEGK                       | 2 | 677.8699  | 2.878 | 0.242 |
| 56 | IPI00022434 | 1 | 86.3 | 1.24 | 0.15 | ### | ## | ALB Uncharacterized protein ALB | n[145]FQNALIVR                  | 1 | 1104.6647 | 2.248 | 0.187 |
| 56 | IPI00022434 | 1 | 86.3 | 1.24 | 0.15 | ### | ## | ALB Uncharacterized protein ALB | FQNALLVR                        | 1 | 1100.6576 | 2.297 | 0.179 |
| 56 | IPI00022434 | 1 | 86.3 | 1.24 | 0.15 | ### | ## | ALB Uncharacterized protein ALB | HPYFYAPPELLFFAK                 | 3 | 675.0329  | 2.863 | 0.13  |
| 56 | IPI00022434 | 1 | 86.3 | 1.24 | 0.15 | ### | ## | ALB Uncharacterized protein ALB | LVNEVTEFAK                      | 3 | 477.2732  | 2.425 | 0.134 |
| 56 | IPI00022434 | 1 | 86.3 | 1.24 | 0.15 | ### | ## | ALB Uncharacterized protein ALB | n[145]QLCVLHEK[272]             | 3 | 435.2417  | 3.108 | 0.271 |
| 56 | IPI00022434 | 1 | 86.3 | 1.24 | 0.15 | ### | ## | ALB Uncharacterized protein ALB | n[145]AACLLPK[272]              | 1 | 1049.609  | 1.764 | 0.11  |
| 56 | IPI00022434 | 1 | 86.3 | 1.24 | 0.15 | ### | ## | ALB Uncharacterized protein ALB | n[145]TFHADICTLSEK[272]         | 3 | 566.9526  | 3.063 | 0.282 |
| 56 | IPI00022434 | 1 | 86.3 | 1.24 | 0.15 | ### | ## | ALB Uncharacterized protein ALB | LKECCEKPLL                      | 3 | 563.2971  | 2.261 | 0.257 |
| 56 | IPI00022434 | 1 | 86.3 | 1.24 | 0.15 | ### | ## | ALB Uncharacterized protein ALB | NYAEAK                          | 2 | 488.2666  | 1.936 | 0.042 |
| 56 | IPI00022434 | 1 | 86.3 | 1.24 | 0.15 | ### | ## | ALB Uncharacterized protein ALB | n[145]ADDK[272]ETCFAEEGQK[272]  | 3 | 683.6592  | 3.192 | 0.306 |
| 56 | IPI00022434 | 1 | 86.3 | 1.24 | 0.15 | ### | ## | ALB Uncharacterized protein ALB | n[145]NYAEAK[272]               | 2 | 492.2737  | 1.795 | 0.108 |
| 56 | IPI00022434 | 1 | 86.3 | 1.24 | 0.15 | ### | ## | ALB Uncharacterized protein ALB | n[145]LDELRDEGK[272]            | 3 | 454.9204  | 2.139 | 0.239 |
| 56 | IPI00022434 | 1 | 86.3 | 1.24 | 0.15 | ### | ## | ALB Uncharacterized protein ALB | n[145]LDELRDEGK[272]            | 2 | 681.877   | 2.741 | 0.17  |
| 56 | IPI00022434 | 1 | 86.3 | 1.24 | 0.15 | ### | ## | ALB Uncharacterized protein ALB | LVRPEVDVM[147]CTAFHDNEETFLKK    | 5 | 641.5268  | 2.87  | 0.041 |
| 56 | IPI00022434 | 1 | 86.3 | 1.24 | 0.15 | ### | ## | ALB Uncharacterized protein ALB | LDELRDEGK                       | 3 | 452.249   | 2.395 | 0.195 |
| 56 | IPI00022434 | 1 | 86.3 | 1.24 | 0.15 | ### | ## | ALB Uncharacterized protein ALB | VFDEFKPLVEEPQNLK                | 4 | 617.1006  | 1.996 | 0.152 |
| 56 | IPI00022434 | 1 | 86.3 | 1.24 | 0.15 | ### | ## | ALB Uncharacterized protein ALB | LKCASLQK                        | 2 | 678.8964  | 2.777 | 0.262 |
| 56 | IPI00022434 | 1 | 86.3 | 1.24 | 0.15 | ### | ## | ALB Uncharacterized protein ALB | TPVSDRVTK                       | 2 | 641.8776  | 2.508 | 0.263 |
| 56 | IPI00022434 | 1 | 86.3 | 1.24 | 0.15 | ### | ## | ALB Uncharacterized protein ALB | AACLLPK                         | 1 | 1041.5948 | 1.714 | 0.088 |
| 56 | IPI00022434 | 1 | 86.3 | 1.24 | 0.15 | ### | ## | ALB Uncharacterized protein ALB | ATKEQLK                         | 3 | 413.2591  | 2.161 | 0.198 |
| 56 | IPI00022434 | 1 | 86.3 | 1.24 | 0.15 | ### | ## | ALB Uncharacterized protein ALB | n[145]SIHTLFGDK[272]            | 3 | 435.9184  | 3.187 | 0.259 |
| 56 | IPI00022434 | 1 | 86.3 | 1.24 | 0.15 | ### | ## | ALB Uncharacterized protein ALB | n[145]CASIQK[272]               | 2 | 492.2665  | 1.47  | 0.143 |
| 56 | IPI00022434 | 1 | 86.3 | 1.24 | 0.15 | ### | ## | ALB Uncharacterized protein ALB | ADDKETCFAEEGQK                  | 3 | 679.6521  | 3.029 | 0.354 |
| 56 | IPI00022434 | 1 | 86.3 | 1.24 | 0.15 | ### | ## | ALB Uncharacterized protein ALB | SIHTLFGDK                       | 3 | 433.247   | 2.485 | 0.15  |
| 56 | IPI00022434 | 1 | 86.3 | 1.24 | 0.15 | ### | ## | ALB Uncharacterized protein ALB | LCTVATLR                        | 1 | 1062.5799 | 1.972 | 0.064 |
| 56 | IPI00022434 | 1 | 86.3 | 1.24 | 0.15 | ### | ## | ALB Uncharacterized protein ALB | n[145]YFYAPPELLFFAK[272]        | 3 | 599.667   | 3.015 | 0.25  |
| 56 | IPI00022434 | 1 | 86.3 | 1.24 | 0.15 | ### | ## | ALB Uncharacterized protein ALB | n[145]AEFAEVSK[272]LVTDLTK[272] | 3 | 695.0719  | 2.43  | 0.243 |
| 56 | IPI00022434 | 1 | 86.3 | 1.24 | 0.15 | ### | ## | ALB Uncharacterized protein ALB | n[145]ATK[272]EQLK[272]         | 3 | 417.2662  | 2.466 | 0.13  |
| 56 | IPI00022434 | 1 | 86.3 | 1.24 | 0.15 | ### | ## | ALB Uncharacterized protein ALB | ADIAK                           | 2 | 399.2477  | 1.927 | 0.203 |
| 56 | IPI00022434 | 1 | 86.3 | 1.24 | 0.15 | ### | ## | ALB Uncharacterized protein ALB | CASIQK                          | 2 | 488.2594  | 1.741 | 0.13  |
| 56 | IPI00022434 | 1 | 86.3 | 1.24 | 0.15 | ### | ## | ALB Uncharacterized protein ALB | TFHADICTLSEK                    | 2 | 845.9182  | 3.833 | 0.399 |
| 56 | IPI00022434 | 1 | 86.3 | 1.24 | 0.15 | ### | ## | ALB Uncharacterized protein ALB | VHTECCHGD                       | 2 | 616.7194  | 2.566 | 0.487 |
| 56 | IPI00022434 | 1 | 86.3 | 1.24 | 0.15 | ### | ## | ALB Uncharacterized protein ALB | DESAENCDK                       | 2 | 668.7791  | 2.983 | 0.443 |
| 56 | IPI00022434 | 1 | 86.3 | 1.24 | 0.15 | ### | ## | ALB Uncharacterized protein ALB | PHECYAK                         | 3 | 391.8563  | 2.641 | 0.143 |
| 56 | IPI00022434 | 1 | 86.3 | 1.24 | 0.15 | ### | ## | ALB Uncharacterized protein ALB | n[145]TALVELVK[272]             | 2 | 580.8783  | 2.643 | 0.308 |
| 56 | IPI00022434 | 1 | 86.3 | 1.24 | 0.15 | ### | ## | ALB Uncharacterized protein ALB | DVCKNYAEAK                      | 3 | 536.2742  | 2.8   | 0.105 |
| 56 | IPI00022434 | 1 | 86.3 | 1.24 | 0.15 | ### | ## | ALB Uncharacterized protein ALB | n[145]DFAAFVEK[272]             | 2 | 607.8366  | 3.607 | 0.344 |
| 56 | IPI00022434 | 1 | 86.3 | 1.24 | 0.15 | ### | ## | ALB Uncharacterized protein ALB | HADICTLSEK                      | 2 | 721.8602  | 3.244 | 0.401 |
| 56 | IPI00022434 | 1 | 86.3 | 1.24 | 0.15 | ### | ## | ALB Uncharacterized protein ALB | n[145]NLGK[272]VGSK[272]        | 2 | 617.8959  | 1.852 | 0.313 |
| 56 | IPI00022434 | 1 | 86.3 | 1.24 | 0.15 | ### | ## | ALB Uncharacterized protein ALB | ESAENCDK                        | 2 | 611.2656  | 2.693 | 0.445 |
| 56 | IPI00022434 | 1 | 86.3 | 1.24 | 0.15 | ### | ## | ALB Uncharacterized protein ALB | n[145]CTESLVNR                  | 2 | 556.2715  | 1.944 | 0.168 |
| 56 | IPI00022434 | 1 | 86.3 | 1.24 | 0.15 | ### | ## | ALB Uncharacterized protein ALB | n[145]APELFFAK[272]             | 2 | 662.3994  | 3.664 | 0.315 |
| 56 | IPI00022434 | 1 | 86.3 | 1.24 | 0.15 | ### | ## | ALB Uncharacterized protein ALB | NLGKVGSK                        | 2 | 611.8852  | 2.128 | 0.266 |
| 56 | IPI00022434 | 1 | 86.3 | 1.24 | 0.15 | ### | ## | ALB Uncharacterized protein ALB | n[145]HADICTLSEK[272]           | 2 | 725.8673  | 3.061 | 0.439 |
| 56 | IPI00022434 | 1 | 86.3 | 1.24 | 0.15 | ### | ## | ALB Uncharacterized protein ALB | n[145]LAK[272]TYETTLEK[272]     | 3 | 577.0085  | 2.385 | 0.148 |

|    |             |   |      |      |      |     |    |                                 |                                |   |          |       |       |
|----|-------------|---|------|------|------|-----|----|---------------------------------|--------------------------------|---|----------|-------|-------|
| 56 | IPI00022434 | 1 | 86.3 | 1.24 | 0.15 | ### | ## | ALB Uncharacterized protein ALB | CFSALEVDETYVVK                 | 2 | 963.9707 | 3.729 | 0.387 |
| 56 | IPI00022434 | 1 | 86.3 | 1.24 | 0.15 | ### | ## | ALB Uncharacterized protein ALB | SEVAHR                         | 2 | 419.7301 | 1.482 | 0.138 |
| 56 | IPI00022434 | 1 | 86.3 | 1.24 | 0.15 | ### | ## | ALB Uncharacterized protein ALB | LKCASLQK                       | 3 | 452.9333 | 3.023 | 0.057 |
| 56 | IPI00022434 | 1 | 86.3 | 1.24 | 0.15 | ### | ## | ALB Uncharacterized protein ALB | DYSVLLLLR                      | 2 | 609.3663 | 2.639 | 0.269 |
| 56 | IPI00022434 | 1 | 86.3 | 1.24 | 0.15 | ### | ## | ALB Uncharacterized protein ALB | TALVELVK                       | 2 | 576.8712 | 3.131 | 0.223 |
| 56 | IPI00022434 | 1 | 86.3 | 1.24 | 0.15 | ### | ## | ALB Uncharacterized protein ALB | PHECYAK                        | 2 | 587.2808 | 2.555 | 0.389 |
| 56 | IPI00022434 | 1 | 86.3 | 1.24 | 0.15 | ### | ## | ALB Uncharacterized protein ALB | n[145]QCPFEDHVK[272]           | 3 | 479.5683 | 2.755 | 0.208 |
| 56 | IPI00022434 | 1 | 86.3 | 1.24 | 0.15 | ### | ## | ALB Uncharacterized protein ALB | FKPLVEEPQNLIK                  | 3 | 659.0628 | 3.046 | 0.217 |
| 56 | IPI00022434 | 1 | 86.3 | 1.24 | 0.15 | ### | ## | ALB Uncharacterized protein ALB | FSALEVDETYVVK                  | 2 | 889.4722 | 3.683 | 0.293 |
| 56 | IPI00022434 | 1 | 86.3 | 1.24 | 0.15 | ### | ## | ALB Uncharacterized protein ALB | LGM[147]FLYEYAR                | 2 | 709.8605 | 2.963 | 0.34  |
| 56 | IPI00022434 | 1 | 86.3 | 1.24 | 0.15 | ### | ## | ALB Uncharacterized protein ALB | APELLFFAK                      | 2 | 658.3923 | 3.288 | 0.274 |
| 56 | IPI00022434 | 1 | 86.3 | 1.24 | 0.15 | ### | ## | ALB Uncharacterized protein ALB | n[145]PELLFFAK[272]            | 2 | 626.8809 | 3.433 | 0.253 |
| 56 | IPI00022434 | 1 | 86.3 | 1.24 | 0.15 | ### | ## | ALB Uncharacterized protein ALB | n[145]EFNAETFTFHADICTLSEK[272] | 4 | 635.0537 | 2.398 | 0.122 |
| 56 | IPI00022434 | 1 | 86.3 | 1.24 | 0.15 | ### | ## | ALB Uncharacterized protein ALB | VHTECCHGDLLECADDR              | 3 | 731.9486 | 2.424 | 0.104 |
| 56 | IPI00022434 | 1 | 86.3 | 1.24 | 0.15 | ### | ## | ALB Uncharacterized protein ALB | QVSTPTLVEVSR                   | 2 | 728.4119 | 2.45  | 0.147 |
| 56 | IPI00022434 | 1 | 86.3 | 1.24 | 0.15 | ### | ## | ALB Uncharacterized protein ALB | n[145]VHTECCHGD                | 2 | 618.723  | 1.91  | 0.513 |
| 56 | IPI00022434 | 1 | 86.3 | 1.24 | 0.15 | ### | ## | ALB Uncharacterized protein ALB | n[145]FYAPELFFAK[272]          | 3 | 545.3126 | 2.639 | 0.238 |
| 56 | IPI00022434 | 1 | 86.3 | 1.24 | 0.15 | ### | ## | ALB Uncharacterized protein ALB | DVCK                           | 2 | 395.7012 | 1.198 | 0.182 |
| 56 | IPI00022434 | 1 | 86.3 | 1.24 | 0.15 | ### | ## | ALB Uncharacterized protein ALB | DDFAAFVEK                      | 2 | 661.343  | 2.685 | 0.32  |
| 56 | IPI00022434 | 1 | 86.3 | 1.24 | 0.15 | ### | ## | ALB Uncharacterized protein ALB | EPERNECFLQHK                   | 4 | 464.729  | 2.543 | 0.267 |
| 56 | IPI00022434 | 1 | 86.3 | 1.24 | 0.15 | ### | ## | ALB Uncharacterized protein ALB | n[145]DYSVLLLLR                | 2 | 611.3698 | 1.786 | 0.081 |
| 56 | IPI00022434 | 1 | 86.3 | 1.24 | 0.15 | ### | ## | ALB Uncharacterized protein ALB | n[145]ADICTLSEK[272]           | 2 | 657.3378 | 2.997 | 0.306 |
| 56 | IPI00022434 | 1 | 86.3 | 1.24 | 0.15 | ### | ## | ALB Uncharacterized protein ALB | n[145]QVSTPTLVEVSR             | 2 | 730.4155 | 2.58  | 0.171 |
| 56 | IPI00022434 | 1 | 86.3 | 1.24 | 0.15 | ### | ## | ALB Uncharacterized protein ALB | HPYFYAPELFF                    | 2 | 768.8979 | 2.819 | 0.314 |
| 56 | IPI00022434 | 1 | 86.3 | 1.24 | 0.15 | ### | ## | ALB Uncharacterized protein ALB | ECFLQHK                        | 3 | 410.8756 | 2.092 | 0.246 |
| 56 | IPI00022434 | 1 | 86.3 | 1.24 | 0.15 | ### | ## | ALB Uncharacterized protein ALB | ALEVDETYVVK                    | 2 | 772.422  | 2.913 | 0.312 |
| 56 | IPI00022434 | 1 | 86.3 | 1.24 | 0.15 | ### | ## | ALB Uncharacterized protein ALB | ATKEQLK                        | 2 | 619.385  | 2.366 | 0.054 |
| 56 | IPI00022434 | 1 | 86.3 | 1.24 | 0.15 | ### | ## | ALB Uncharacterized protein ALB | FLYEYAR                        | 2 | 551.29   | 2.182 | 0.236 |
| 56 | IPI00022434 | 1 | 86.3 | 1.24 | 0.15 | ### | ## | ALB Uncharacterized protein ALB | RHPYFYAPELL                    | 2 | 773.4143 | 2.366 | 0.06  |
| 56 | IPI00022434 | 1 | 86.3 | 1.24 | 0.15 | ### | ## | ALB Uncharacterized protein ALB | PELLFFAK                       | 2 | 622.8738 | 3.169 | 0.353 |
| 56 | IPI00022434 | 1 | 86.3 | 1.24 | 0.15 | ### | ## | ALB Uncharacterized protein ALB | n[145]ESAENCDK[272]            | 2 | 615.2727 | 2.34  | 0.339 |
| 56 | IPI00022434 | 1 | 86.3 | 1.24 | 0.15 | ### | ## | ALB Uncharacterized protein ALB | ELLFFAK                        | 2 | 574.3474 | 2.61  | 0.24  |
| 56 | IPI00022434 | 1 | 86.3 | 1.24 | 0.15 | ### | ## | ALB Uncharacterized protein ALB | SALEVDETYVVK                   | 2 | 815.938  | 3.903 | 0.418 |
| 56 | IPI00022434 | 1 | 86.3 | 1.24 | 0.15 | ### | ## | ALB Uncharacterized protein ALB | YLQQCPFEDHVK                   | 3 | 611.6323 | 4.971 | 0.456 |
| 56 | IPI00022434 | 1 | 86.3 | 1.24 | 0.15 | ### | ## | ALB Uncharacterized protein ALB | n[145]VNEVTEFAK[272]           | 2 | 662.8712 | 2.654 | 0.29  |
| 56 | IPI00022434 | 1 | 86.3 | 1.24 | 0.15 | ### | ## | ALB Uncharacterized protein ALB | n[145]CVLHEK[272]              | 2 | 531.7876 | 2.428 | 0.209 |
| 56 | IPI00022434 | 1 | 86.3 | 1.24 | 0.15 | ### | ## | ALB Uncharacterized protein ALB | n[145]CTVATLR                  | 2 | 477.2551 | 2.278 | 0.255 |
| 56 | IPI00022434 | 1 | 86.3 | 1.24 | 0.15 | ### | ## | ALB Uncharacterized protein ALB | QLCVLHEK                       | 2 | 648.3518 | 2.737 | 0.21  |
| 56 | IPI00022434 | 1 | 86.3 | 1.24 | 0.15 | ### | ## | ALB Uncharacterized protein ALB | n[145]RM[147]PCAEDYLSVVLNQL    | 2 | 1029.003 | 2.39  | 0.322 |
| 56 | IPI00022434 | 1 | 86.3 | 1.24 | 0.15 | ### | ## | ALB Uncharacterized protein ALB | n[145]FSALEVDETYVVK[272]       | 2 | 893.4793 | 3.017 | 0.328 |
| 56 | IPI00022434 | 1 | 86.3 | 1.24 | 0.15 | ### | ## | ALB Uncharacterized protein ALB | EPERNECFLQHK                   | 3 | 619.3029 | 2.903 | 0.25  |
| 56 | IPI00022434 | 1 | 86.3 | 1.24 | 0.15 | ### | ## | ALB Uncharacterized protein ALB | LQQCPFEDHVK                    | 3 | 557.2778 | 2.56  | 0.229 |
| 56 | IPI00022434 | 1 | 86.3 | 1.24 | 0.15 | ### | ## | ALB Uncharacterized protein ALB | HPYFYAPELL                     | 2 | 695.3637 | 2.509 | 0.257 |
| 56 | IPI00022434 | 1 | 86.3 | 1.24 | 0.15 | ### | ## | ALB Uncharacterized protein ALB | n[145]EFAEVSK[272]             | 2 | 549.3077 | 3.16  | 0.135 |
| 56 | IPI00022434 | 1 | 86.3 | 1.24 | 0.15 | ### | ## | ALB Uncharacterized protein ALB | TECCQAADK                      | 2 | 670.7769 | 2.543 | 0.256 |
| 56 | IPI00022434 | 1 | 86.3 | 1.24 | 0.15 | ### | ## | ALB Uncharacterized protein ALB | HPYFYAPEL                      | 2 | 638.8217 | 1.934 | 0.114 |
| 56 | IPI00022434 | 1 | 86.3 | 1.24 | 0.15 | ### | ## | ALB Uncharacterized protein ALB | n[145]EVDETYVVK[272]           | 2 | 684.3685 | 2.87  | 0.194 |
| 56 | IPI00022434 | 1 | 86.3 | 1.24 | 0.15 | ### | ## | ALB Uncharacterized protein ALB | HPYFYAPELFF                    | 2 | 842.4321 | 2.294 | 0.321 |

|    |             |   |      |      |      |     |    |                                 |                          |   |           |       |       |
|----|-------------|---|------|------|------|-----|----|---------------------------------|--------------------------|---|-----------|-------|-------|
| 56 | IPI00022434 | 1 | 86.3 | 1.24 | 0.15 | ### | ## | ALB Uncharacterized protein ALB | n[145]DDFAAFVEK[272]     | 2 | 665.3501  | 2.633 | 0.281 |
| 56 | IPI00022434 | 1 | 86.3 | 1.24 | 0.15 | ### | ## | ALB Uncharacterized protein ALB | CCKHPEAK                 | 3 | 476.5641  | 2.283 | 0.077 |
| 56 | IPI00022434 | 1 | 86.3 | 1.24 | 0.15 | ### | ## | ALB Uncharacterized protein ALB | CCKHPEAK                 | 2 | 714.3426  | 2.083 | 0.016 |
| 56 | IPI00022434 | 1 | 86.3 | 1.24 | 0.15 | ### | ## | ALB Uncharacterized protein ALB | LGEENFK                  | 2 | 558.8061  | 2.741 | 0.142 |
| 56 | IPI00022434 | 1 | 86.3 | 1.24 | 0.15 | ### | ## | ALB Uncharacterized protein ALB | EFNAETFTFHAD             | 2 | 784.8545  | 2.207 | 0.325 |
| 56 | IPI00022434 | 1 | 86.3 | 1.24 | 0.15 | ### | ## | ALB Uncharacterized protein ALB | CVLHEK                   | 2 | 527.7805  | 2.238 | 0.165 |
| 56 | IPI00022434 | 1 | 86.3 | 1.24 | 0.15 | ### | ## | ALB Uncharacterized protein ALB | n[145]DVFLGM[147]FLYEYAR | 3 | 595.2997  | 2.059 | 0.068 |
| 56 | IPI00022434 | 1 | 86.3 | 1.24 | 0.15 | ### | ## | ALB Uncharacterized protein ALB | EFAEVSK                  | 2 | 545.3006  | 2.94  | 0.106 |
| 56 | IPI00022434 | 1 | 86.3 | 1.24 | 0.15 | ### | ## | ALB Uncharacterized protein ALB | YLQQCPFEDHVK             | 2 | 916.9448  | 3.681 | 0.465 |
| 56 | IPI00022434 | 1 | 86.3 | 1.24 | 0.15 | ### | ## | ALB Uncharacterized protein ALB | n[145]PHECYAK[272]       | 2 | 591.2879  | 2.285 | 0.18  |
| 56 | IPI00022434 | 1 | 86.3 | 1.24 | 0.15 | ### | ## | ALB Uncharacterized protein ALB | FYAPPELLFFAK             | 3 | 542.6412  | 2.783 | 0.06  |
| 56 | IPI00022434 | 1 | 86.3 | 1.24 | 0.15 | ### | ## | ALB Uncharacterized protein ALB | KVPQVSTPTLV              | 2 | 724.9454  | 2.074 | 0.255 |
| 56 | IPI00022434 | 1 | 86.3 | 1.24 | 0.15 | ### | ## | ALB Uncharacterized protein ALB | LGMFLYEYAR               | 2 | 701.863   | 2.55  | 0.312 |
| 56 | IPI00022434 | 1 | 86.3 | 1.24 | 0.15 | ### | ## | ALB Uncharacterized protein ALB | n[145]HADICTLSEK[272]    | 3 | 484.2473  | 2.679 | 0.136 |
| 56 | IPI00022434 | 1 | 86.3 | 1.24 | 0.15 | ### | ## | ALB Uncharacterized protein ALB | n[145]EK[272]PLLEK[272]  | 3 | 430.2782  | 2.425 | 0.093 |
| 56 | IPI00022434 | 1 | 86.3 | 1.24 | 0.15 | ### | ## | ALB Uncharacterized protein ALB | EKPLLEK                  | 3 | 426.2711  | 2.747 | 0.078 |
| 56 | IPI00022434 | 1 | 86.3 | 1.24 | 0.15 | ### | ## | ALB Uncharacterized protein ALB | n[145]LYEYAR             | 2 | 479.7594  | 1.845 | 0.11  |
| 56 | IPI00022434 | 1 | 86.3 | 1.24 | 0.15 | ### | ## | ALB Uncharacterized protein ALB | KVPQVSTPTLVEV            | 2 | 839.0009  | 2.257 | 0.265 |
| 56 | IPI00022434 | 1 | 86.3 | 1.24 | 0.15 | ### | ## | ALB Uncharacterized protein ALB | TPVSDRVTK                | 3 | 428.2541  | 2.177 | 0.051 |
| 56 | IPI00022434 | 1 | 86.3 | 1.24 | 0.15 | ### | ## | ALB Uncharacterized protein ALB | n[145]EQLGEYK[272]       | 2 | 577.8184  | 2.498 | 0.129 |
| 56 | IPI00022434 | 1 | 86.3 | 1.24 | 0.15 | ### | ## | ALB Uncharacterized protein ALB | TESLVNR                  | 2 | 479.7695  | 2.317 | 0.127 |
| 56 | IPI00022434 | 1 | 86.3 | 1.24 | 0.15 | ### | ## | ALB Uncharacterized protein ALB | ETYVPK                   | 2 | 508.7924  | 2.07  | 0.15  |
| 56 | IPI00022434 | 1 | 86.3 | 1.24 | 0.15 | ### | ## | ALB Uncharacterized protein ALB | ADFVESK                  | 2 | 538.2928  | 2.292 | 0.131 |
| 56 | IPI00022434 | 1 | 86.3 | 1.24 | 0.15 | ### | ## | ALB Uncharacterized protein ALB | TAFHDNEETFLKK            | 4 | 500.7705  | 3.421 | 0.134 |
| 56 | IPI00022434 | 1 | 86.3 | 1.24 | 0.15 | ### | ## | ALB Uncharacterized protein ALB | ALVLIAFAQ                | 1 | 1085.6718 | 1.794 | 0.523 |
| 56 | IPI00022434 | 1 | 86.3 | 1.24 | 0.15 | ### | ## | ALB Uncharacterized protein ALB | EQLGEYK                  | 2 | 573.8113  | 2.337 | 0.108 |
| 56 | IPI00022434 | 1 | 86.3 | 1.24 | 0.15 | ### | ## | ALB Uncharacterized protein ALB | LVRPEVD                  | 2 | 484.2822  | 1.528 | 0.263 |
| 56 | IPI00022434 | 1 | 86.3 | 1.24 | 0.15 | ### | ## | ALB Uncharacterized protein ALB | ECFLQHK                  | 2 | 615.8098  | 1.989 | 0.216 |
| 56 | IPI00022434 | 1 | 86.3 | 1.24 | 0.15 | ### | ## | ALB Uncharacterized protein ALB | LYEYAR                   | 2 | 477.7558  | 1.6   | 0.041 |
| 56 | IPI00022434 | 1 | 86.3 | 1.24 | 0.15 | ### | ## | ALB Uncharacterized protein ALB | n[145]LVRPEVDVMCTAFH     | 3 | 602.9656  | 2.912 | 0.11  |
| 56 | IPI00022434 | 1 | 86.3 | 1.24 | 0.15 | ### | ## | ALB Uncharacterized protein ALB | RHPDYSVVL                | 2 | 613.338   | 2.009 | 0.202 |
| 56 | IPI00022434 | 1 | 86.3 | 1.24 | 0.15 | ### | ## | ALB Uncharacterized protein ALB | EVDETYVPK                | 2 | 680.3614  | 2.361 | 0.258 |
| 56 | IPI00022434 | 1 | 86.3 | 1.24 | 0.15 | ### | ## | ALB Uncharacterized protein ALB | RPCFSALEVDE              | 2 | 726.3365  | 1.298 | 0.387 |
| 56 | IPI00022434 | 1 | 86.3 | 1.24 | 0.15 | ### | ## | ALB Uncharacterized protein ALB | KDLGEENFK                | 2 | 750.4145  | 3.506 | 0.213 |
| 56 | IPI00022434 | 1 | 86.3 | 1.24 | 0.15 | ### | ## | ALB Uncharacterized protein ALB | DVFLGMFL                 | 1 | 1081.5751 | 1.912 | 0.346 |
| 56 | IPI00022434 | 1 | 86.3 | 1.24 | 0.15 | ### | ## | ALB Uncharacterized protein ALB | AVMDDFAAFVEK             | 3 | 541.6131  | 1.843 | 0.04  |
| 56 | IPI00022434 | 1 | 86.3 | 1.24 | 0.15 | ### | ## | ALB Uncharacterized protein ALB | n[145]LLECADDR           | 2 | 562.7635  | 2.137 | 0.129 |
| 56 | IPI00022434 | 1 | 86.3 | 1.24 | 0.15 | ### | ## | ALB Uncharacterized protein ALB | n[145]FAAFVEK[272]       | 2 | 550.3232  | 2.005 | 0.139 |
| 56 | IPI00022434 | 1 | 86.3 | 1.24 | 0.15 | ### | ## | ALB Uncharacterized protein ALB | n[145]YLQQCPFEDHVK[272]  | 3 | 614.3037  | 3.621 | 0.34  |
| 56 | IPI00022434 | 1 | 86.3 | 1.24 | 0.15 | ### | ## | ALB Uncharacterized protein ALB | n[145]JELLFFAK[272]      | 2 | 578.3545  | 2.092 | 0.101 |
| 56 | IPI00022434 | 1 | 86.3 | 1.24 | 0.15 | ### | ## | ALB Uncharacterized protein ALB | DNPNLPR                  | 2 | 483.2618  | 1.957 | 0.159 |
| 56 | IPI00022434 | 1 | 86.3 | 1.24 | 0.15 | ### | ## | ALB Uncharacterized protein ALB | VSTPTLVEVSR              | 2 | 664.3827  | 2.392 | 0.141 |
| 56 | IPI00022434 | 1 | 86.3 | 1.24 | 0.15 | ### | ## | ALB Uncharacterized protein ALB | n[145]ECCEK[272]         | 2 | 496.2016  | 1.788 | 0.169 |
| 56 | IPI00022434 | 1 | 86.3 | 1.24 | 0.15 | ### | ## | ALB Uncharacterized protein ALB | n[145]RPCFSALEVDE        | 2 | 663.8188  | 1.951 | 0.164 |
| 56 | IPI00022434 | 1 | 86.3 | 1.24 | 0.15 | ### | ## | ALB Uncharacterized protein ALB | n[145]DVFLGMFL           | 1 | 1085.5822 | 1.985 | 0.326 |
| 56 | IPI00022434 | 1 | 86.3 | 1.24 | 0.15 | ### | ## | ALB Uncharacterized protein ALB | n[145]CCAAAD             | 1 | 789.252   | 1.321 | 0.57  |
| 56 | IPI00022434 | 1 | 86.3 | 1.24 | 0.15 | ### | ## | ALB Uncharacterized protein ALB | EFNAETFTFHA              | 2 | 727.341   | 2.286 | 0.289 |
| 56 | IPI00022434 | 1 | 86.3 | 1.24 | 0.15 | ### | ## | ALB Uncharacterized protein ALB | n[145]ECFLQHK[272]       | 3 | 413.547   | 2.315 | 0.111 |



|    |             |   |      |      |      |     |    |                                       |                              |   |           |       |       |
|----|-------------|---|------|------|------|-----|----|---------------------------------------|------------------------------|---|-----------|-------|-------|
| 56 | IPI00022434 | 1 | 86.3 | 1.24 | 0.15 | ### | ## | ALB Uncharacterized protein ALB       | RHPDYSVLL                    | 2 | 669.8801  | 2.053 | 0.236 |
| 56 | IPI00022434 | 1 | 86.3 | 1.24 | 0.15 | ### | ## | ALB Uncharacterized protein ALB       | n[145]NECFMQH                | 2 | 540.7398  | 1.917 | 0.122 |
| 56 | IPI00022434 | 1 | 86.3 | 1.24 | 0.15 | ### | ## | ALB Uncharacterized protein ALB       | n[145]RHPYFYAPEL             | 2 | 718.8758  | 2.125 | 0.089 |
| 56 | IPI00022434 | 1 | 86.3 | 1.24 | 0.15 | ### | ## | ALB Uncharacterized protein ALB       | n[145]LLFFAK[272]            | 2 | 513.8332  | 1.704 | 0.126 |
| 56 | IPI00022434 | 1 | 86.3 | 1.24 | 0.15 | ### | ## | ALB Uncharacterized protein ALB       | ECCEK                        | 2 | 492.1945  | 1.776 | 0.147 |
| 56 | IPI00022434 | 1 | 86.3 | 1.24 | 0.15 | ### | ## | ALB Uncharacterized protein ALB       | PLLEK                        | 2 | 440.2868  | 1.519 | 0.055 |
| 56 | IPI00022434 | 1 | 86.3 | 1.24 | 0.15 | ### | ## | ALB Uncharacterized protein ALB       | LDELRDEGKASSAK               | 4 | 485.5207  | 2.256 | 0.031 |
| 56 | IPI00022434 | 1 | 86.3 | 1.24 | 0.15 | ### | ## | ALB Uncharacterized protein ALB       | n[145]FK[272]PLVEEPQNLK[272] | 3 | 663.0699  | 2.152 | 0.129 |
| 56 | IPI00022434 | 1 | 86.3 | 1.24 | 0.15 | ### | ## | ALB Uncharacterized protein ALB       | NLGKVGSK                     | 3 | 408.2592  | 1.713 | 0.064 |
| 56 | IPI00022434 | 1 | 86.3 | 1.24 | 0.15 | ### | ## | ALB Uncharacterized protein ALB       | RHPYFYAPEL                   | 2 | 716.8723  | 2.058 | 0.158 |
| 56 | IPI00022434 | 1 | 86.3 | 1.24 | 0.15 | ### | ## | ALB Uncharacterized protein ALB       | n[145]LGEENFK[272]           | 2 | 562.8132  | 2.122 | 0.075 |
| 56 | IPI00022434 | 1 | 86.3 | 1.24 | 0.15 | ### | ## | ALB Uncharacterized protein ALB       | n[145]RHPDYSVLL              | 2 | 728.4257  | 1.706 | 0.222 |
| 56 | IPI00022434 | 1 | 86.3 | 1.24 | 0.15 | ### | ## | ALB Uncharacterized protein ALB       | KPLLEK                       | 3 | 383.2569  | 2.599 | 0.063 |
| 56 | IPI00022434 | 1 | 86.3 | 1.24 | 0.15 | ### | ## | ALB Uncharacterized protein ALB       | QNALLVR                      | 2 | 477.2982  | 2.25  | 0.1   |
| 56 | IPI00022434 | 1 | 86.3 | 1.24 | 0.15 | ### | ## | ALB Uncharacterized protein ALB       | n[145]VTDLTK[272]            | 2 | 482.7995  | 2.013 | 0.049 |
| 56 | IPI00022434 | 1 | 86.3 | 1.24 | 0.15 | ### | ## | ALB Uncharacterized protein ALB       | n[145]VFDEFK[272]            | 2 | 536.7995  | 2.015 | 0.046 |
| 56 | IPI00022434 | 1 | 86.3 | 1.24 | 0.15 | ### | ## | ALB Uncharacterized protein ALB       | n[145]YLQCPFEDHVK[272]       | 2 | 920.9519  | 4.393 | 0.335 |
| 56 | IPI00022434 | 1 | 86.3 | 1.24 | 0.15 | ### | ## | ALB Uncharacterized protein ALB       | ADICTLSEK                    | 2 | 653.3307  | 2.644 | 0.243 |
| 56 | IPI00022434 | 1 | 86.3 | 1.24 | 0.15 | ### | ## | ALB Uncharacterized protein ALB       | n[145]IYEIAR                 | 2 | 454.7697  | 2.144 | 0.122 |
| 56 | IPI00022434 | 1 | 86.3 | 1.24 | 0.15 | ### | ## | ALB Uncharacterized protein ALB       | KVPQVSTPTLVEVS               | 2 | 882.517   | 2.651 | 0.424 |
| 56 | IPI00022434 | 1 | 86.3 | 1.24 | 0.15 | ### | ## | ALB Uncharacterized protein ALB       | n[145]VHTECCHGDLE            | 2 | 796.3283  | 1.656 | 0.239 |
| 56 | IPI00022434 | 1 | 86.3 | 1.24 | 0.15 | ### | ## | ALB Uncharacterized protein ALB       | CTAFHDNEETFLKK               | 4 | 538.0197  | 2.233 | 0.031 |
| 56 | IPI00022434 | 1 | 86.3 | 1.24 | 0.15 | ### | ## | ALB Uncharacterized protein ALB       | CCAAAD                       | 1 | 785.2449  | 1.34  | 0.407 |
| 56 | IPI00022434 | 1 | 86.3 | 1.24 | 0.15 | ### | ## | ALB Uncharacterized protein ALB       | n[145]VHTECCHGD              | 3 | 412.8177  | 1.451 | 0.196 |
| 56 | IPI00022434 | 1 | 86.3 | 1.24 | 0.15 | ### | ## | ALB Uncharacterized protein ALB       | n[145]PLLEK[272]             | 2 | 444.2939  | 1.942 | 0     |
| 56 | IPI00022434 | 1 | 86.3 | 1.24 | 0.15 | ### | ## | ALB Uncharacterized protein ALB       | n[145]TECCQAADK[272]         | 2 | 674.784   | 1.931 | 0.105 |
| 56 | IPI00022434 | 1 | 86.3 | 1.24 | 0.15 | ### | ## | ALB Uncharacterized protein ALB       | n[145]VHTECCHGDLL            | 2 | 731.807   | 2.095 | 0.12  |
| 56 | IPI00022434 | 1 | 86.3 | 1.24 | 0.15 | ### | ## | ALB Uncharacterized protein ALB       | n[145]LVRPEVD                | 2 | 486.2858  | 1.559 | 0.126 |
| 56 | IPI00022434 | 1 | 86.3 | 1.24 | 0.15 | ### | ## | ALB Uncharacterized protein ALB       | n[145]RHPDYSVV               | 2 | 558.7996  | 1.829 | 0.13  |
| 56 | IPI00022434 | 1 | 86.3 | 1.24 | 0.15 | ### | ## | ALB Uncharacterized protein ALB       | RPCFSAL                      | 2 | 490.2462  | 1.689 | 0.117 |
| 56 | IPI00022434 | 1 | 86.3 | 1.24 | 0.15 | ### | ## | ALB Uncharacterized protein ALB       | n[145]RPCFSALEVD             | 2 | 778.8639  | 1.97  | 0.136 |
| 56 | IPI00022434 | 1 | 86.3 | 1.24 | 0.15 | ### | ## | ALB Uncharacterized protein ALB       | n[145]FK[272]DLGEEN          | 2 | 620.3266  | 1.912 | 0.262 |
| 56 | IPI00022434 | 1 | 86.3 | 1.24 | 0.15 | ### | ## | ALB Uncharacterized protein ALB       | n[145]RM[147]PCAEDYLSVVLNQL  | 3 | 686.3377  | 2.426 | 0.084 |
| 56 | IPI00022434 | 1 | 86.3 | 1.24 | 0.15 | ### | ## | ALB Uncharacterized protein ALB       | TFHADICTLSEK                 | 3 | 564.2812  | 1.912 | 0.135 |
| 56 | IPI00022434 | 1 | 86.3 | 1.24 | 0.15 | ### | ## | ALB Uncharacterized protein ALB       | n[145]SHCIAEVENDEM[147]PAD   | 2 | 933.3773  | 1.687 | 0.39  |
| 56 | IPI00022434 | 1 | 86.3 | 1.24 | 0.15 | ### | ## | ALB Uncharacterized protein ALB       | n[145]DELRDEGK[272]          | 3 | 417.2257  | 2.222 | 0.116 |
| 56 | IPI00022434 | 1 | 86.3 | 1.24 | 0.15 | ### | ## | ALB Uncharacterized protein ALB       | NECFMQH                      | 2 | 538.7362  | 1.533 | 0.053 |
| 56 | IPI00022434 | 1 | 86.3 | 1.24 | 0.15 | ### | ## | ALB Uncharacterized protein ALB       | CQAADK                       | 2 | 481.2334  | 1.528 | 0.049 |
| 56 | IPI00022434 | 1 | 86.3 | 1.24 | 0.15 | ### | ## | ALB Uncharacterized protein ALB       | TAFHDNEETFLK                 | 2 | 866.4387  | 3.075 | 0.309 |
| 56 | IPI00022434 | 1 | 86.3 | 1.24 | 0.15 | ### | ## | ALB Uncharacterized protein ALB       | DELRDEGK                     | 2 | 621.3279  | 2.296 | 0.107 |
| 56 | IPI00022434 | 1 | 86.3 | 1.24 | 0.15 | ### | ## | ALB Uncharacterized protein ALB       | FKDLGEEN                     | 2 | 616.3195  | 1.758 | 0.25  |
| 56 | IPI00022434 | 1 | 86.3 | 1.24 | 0.15 | ### | ## | ALB Uncharacterized protein ALB       | n[145]ADDK[272]ETCFEAG       | 2 | 824.8573  | 2.224 | 0.215 |
| 56 | IPI00022434 | 1 | 86.3 | 1.24 | 0.15 | ### | ## | ALB Uncharacterized protein ALB       | n[145]CCAAADPH               | 2 | 512.1855  | 1.346 | 0.093 |
| 57 | IPI00022445 | 1 | 29.7 | 0.26 | 0.01 | 7   | 6  | PPBP Platelet basic protein precursor | n[145]GK[272]EESLSDLYAELR    | 2 | 1007.0226 | 4.78  | 0.433 |
| 57 | IPI00022445 | 1 | 29.7 | 0.26 | 0.01 | 7   | 6  | PPBP Platelet basic protein precursor | n[145]GK[272]EESLSDLYAELR    | 3 | 671.6842  | 2.928 | 0.458 |
| 57 | IPI00022445 | 1 | 29.7 | 0.26 | 0.01 | 7   | 6  | PPBP Platelet basic protein precursor | n[145]GTHCNQVEVIATLK[272]    | 3 | 616.3301  | 3.688 | 0.316 |
| 57 | IPI00022445 | 1 | 29.7 | 0.26 | 0.01 | 7   | 6  | PPBP Platelet basic protein precursor | GTHCNQVEVIATLK               | 3 | 613.6587  | 3.214 | 0.281 |
| 57 | IPI00022445 | 1 | 29.7 | 0.26 | 0.01 | 7   | 6  | PPBP Platelet basic protein precursor | GKEESLSDLYAELR               | 3 | 669.0128  | 2.893 | 0.275 |

|    |             |   |      |      |      |     |    |                                       |                                    |   |           |       |       |
|----|-------------|---|------|------|------|-----|----|---------------------------------------|------------------------------------|---|-----------|-------|-------|
| 57 | IPI00022445 | 1 | 29.7 | 0.26 | 0.01 | 7   | 6  | PPBP Platelet basic protein precursor | n[145]ICLDPDAPR                    | 2 | 595.2949  | 2.146 | 0.12  |
| 58 | IPI00022488 | 1 | 62.8 | 0.8  | 0.14 | 222 | 86 | HPX Hemopexin precursor               | NFPSPVDAAFR                        | 1 | 1360.7009 | 3.116 | 0.478 |
| 58 | IPI00022488 | 1 | 62.8 | 0.8  | 0.14 | 222 | 86 | HPX Hemopexin precursor               | n[145]NFPSPVDAAFR                  | 1 | 1364.708  | 3.508 | 0.47  |
| 58 | IPI00022488 | 1 | 62.8 | 0.8  | 0.14 | 222 | 86 | HPX Hemopexin precursor               | n[145]VDGALCMEK[272]               | 1 | 1299.635  | 3.075 | 0.431 |
| 58 | IPI00022488 | 1 | 62.8 | 0.8  | 0.14 | 222 | 86 | HPX Hemopexin precursor               | GGYTLVSGYPK                        | 2 | 711.393   | 3.986 | 0.38  |
| 58 | IPI00022488 | 1 | 62.8 | 0.8  | 0.14 | 222 | 86 | HPX Hemopexin precursor               | QGHNSVFLIK                         | 2 | 711.9145  | 4.115 | 0.389 |
| 58 | IPI00022488 | 1 | 62.8 | 0.8  | 0.14 | 222 | 86 | HPX Hemopexin precursor               | SGAQATWTELPWPHEK[272]              | 2 | 1061.5456 | 4.395 | 0.446 |
| 58 | IPI00022488 | 1 | 62.8 | 0.8  | 0.14 | 222 | 86 | HPX Hemopexin precursor               | n[145]EVGTPHGIILDSVDAAFICPGSSR     | 2 | 1316.155  | 5.944 | 0.555 |
| 58 | IPI00022488 | 1 | 62.8 | 0.8  | 0.14 | 222 | 86 | HPX Hemopexin precursor               | n[145]EWFWDLATGTMK[272]            | 2 | 886.9497  | 3.371 | 0.491 |
| 58 | IPI00022488 | 1 | 62.8 | 0.8  | 0.14 | 222 | 86 | HPX Hemopexin precursor               | n[145]GECQAEGVLFFQGDR              | 2 | 923.4227  | 4.843 | 0.417 |
| 58 | IPI00022488 | 1 | 62.8 | 0.8  | 0.14 | 222 | 86 | HPX Hemopexin precursor               | n[145]GGYTLVSGYPK[272]             | 2 | 715.4001  | 3.313 | 0.256 |
| 58 | IPI00022488 | 1 | 62.8 | 0.8  | 0.14 | 222 | 86 | HPX Hemopexin precursor               | n[145]GIILDSVDAAFICPGSSR           | 2 | 1006.0091 | 5.108 | 0.488 |
| 58 | IPI00022488 | 1 | 62.8 | 0.8  | 0.14 | 222 | 86 | HPX Hemopexin precursor               | n[145]LLQDEFFGIPSPLDAAVECHR        | 2 | 1249.1204 | 5.348 | 0.507 |
| 58 | IPI00022488 | 1 | 62.8 | 0.8  | 0.14 | 222 | 86 | HPX Hemopexin precursor               | n[145]VDGALCMEK[272]               | 2 | 650.3211  | 3.552 | 0.383 |
| 58 | IPI00022488 | 1 | 62.8 | 0.8  | 0.14 | 222 | 86 | HPX Hemopexin precursor               | n[145]YYCFQGNQFLR                  | 2 | 814.8772  | 2.478 | 0.415 |
| 58 | IPI00022488 | 1 | 62.8 | 0.8  | 0.14 | 222 | 86 | HPX Hemopexin precursor               | GNVAEGETKPPDVTER                   | 3 | 698.6869  | 3.347 | 0.362 |
| 58 | IPI00022488 | 1 | 62.8 | 0.8  | 0.14 | 222 | 86 | HPX Hemopexin precursor               | GPGLYLIHGPNLYCYSVDEK               | 3 | 855.4274  | 5.81  | 0.522 |
| 58 | IPI00022488 | 1 | 62.8 | 0.8  | 0.14 | 222 | 86 | HPX Hemopexin precursor               | n[145]EVGTPHGIILDSVDAAFICPGSSR     | 3 | 877.7724  | 4.156 | 0.397 |
| 58 | IPI00022488 | 1 | 62.8 | 0.8  | 0.14 | 222 | 86 | HPX Hemopexin precursor               | n[145]GLYLIHGPNLYCYSVDEK[272]      | 3 | 806.7407  | 5.147 | 0.474 |
| 58 | IPI00022488 | 1 | 62.8 | 0.8  | 0.14 | 222 | 86 | HPX Hemopexin precursor               | n[145]GPGLYLIHGPNLYCYSVDEK[272]    | 3 | 858.0988  | 5.214 | 0.495 |
| 58 | IPI00022488 | 1 | 62.8 | 0.8  | 0.14 | 222 | 86 | HPX Hemopexin precursor               | n[145]LLQDEFFGIPSPLDAAVECHR        | 3 | 833.0827  | 4.065 | 0.318 |
| 58 | IPI00022488 | 1 | 62.8 | 0.8  | 0.14 | 222 | 86 | HPX Hemopexin precursor               | n[145]SANGPGLYLIHGPNLYCYSVDEK[272] | 3 | 948.8028  | 6.009 | 0.467 |
| 58 | IPI00022488 | 1 | 62.8 | 0.8  | 0.14 | 222 | 86 | HPX Hemopexin precursor               | n[145]DYFMPCPGR                    | 2 | 638.2757  | 2.784 | 0.294 |
| 58 | IPI00022488 | 1 | 62.8 | 0.8  | 0.14 | 222 | 86 | HPX Hemopexin precursor               | n[145]NFPSPVDAAFR                  | 2 | 682.8576  | 2.164 | 0.282 |
| 58 | IPI00022488 | 1 | 62.8 | 0.8  | 0.14 | 222 | 86 | HPX Hemopexin precursor               | n[145]QGHNSVFLIK[272]              | 2 | 715.9216  | 4.121 | 0.31  |
| 58 | IPI00022488 | 1 | 62.8 | 0.8  | 0.14 | 222 | 86 | HPX Hemopexin precursor               | n[145]CSPHLVLSALTSNDHG             | 3 | 614.2983  | 2.723 | 0.223 |
| 58 | IPI00022488 | 1 | 62.8 | 0.8  | 0.14 | 222 | 86 | HPX Hemopexin precursor               | VDGALCMEK                          | 2 | 646.314   | 3.024 | 0.47  |
| 58 | IPI00022488 | 1 | 62.8 | 0.8  | 0.14 | 222 | 86 | HPX Hemopexin precursor               | n[145]ALPQPQNVTSLLGCTH             | 2 | 934.9776  | 3.422 | 0.389 |
| 58 | IPI00022488 | 1 | 62.8 | 0.8  | 0.14 | 222 | 86 | HPX Hemopexin precursor               | n[145]YYCFQGNQFLR                  | 3 | 543.5872  | 3.076 | 0.218 |
| 58 | IPI00022488 | 1 | 62.8 | 0.8  | 0.14 | 222 | 86 | HPX Hemopexin precursor               | NFPSPVDAAFR                        | 2 | 680.8541  | 2.986 | 0.331 |
| 58 | IPI00022488 | 1 | 62.8 | 0.8  | 0.14 | 222 | 86 | HPX Hemopexin precursor               | n[145]VDGALCM[147]EK[272]          | 2 | 658.3186  | 2.46  | 0.302 |
| 58 | IPI00022488 | 1 | 62.8 | 0.8  | 0.14 | 222 | 86 | HPX Hemopexin precursor               | n[145]DYFM[147]PCPGR               | 2 | 646.2731  | 2.374 | 0.238 |
| 58 | IPI00022488 | 1 | 62.8 | 0.8  | 0.14 | 222 | 86 | HPX Hemopexin precursor               | VDGALCM[147]EK                     | 2 | 654.3115  | 2.67  | 0.306 |
| 58 | IPI00022488 | 1 | 62.8 | 0.8  | 0.14 | 222 | 86 | HPX Hemopexin precursor               | GLYLIHGPNLYCYSVDEK                 | 3 | 804.0693  | 4.34  | 0.385 |
| 58 | IPI00022488 | 1 | 62.8 | 0.8  | 0.14 | 222 | 86 | HPX Hemopexin precursor               | n[145]DYFMPCPGR                    | 1 | 1275.5441 | 1.85  | 0.214 |
| 58 | IPI00022488 | 1 | 62.8 | 0.8  | 0.14 | 222 | 86 | HPX Hemopexin precursor               | n[145]SLGPNSCSANGPGLYLIHGPN        | 3 | 753.3653  | 4.356 | 0.331 |
| 58 | IPI00022488 | 1 | 62.8 | 0.8  | 0.14 | 222 | 86 | HPX Hemopexin precursor               | n[145]FDPVRGEVPPR                  | 3 | 471.5971  | 1.555 | 0.23  |
| 58 | IPI00022488 | 1 | 62.8 | 0.8  | 0.14 | 222 | 86 | HPX Hemopexin precursor               | n[145]CSPHLVLSALTSNDHGA            | 3 | 637.9773  | 3.871 | 0.321 |
| 58 | IPI00022488 | 1 | 62.8 | 0.8  | 0.14 | 222 | 86 | HPX Hemopexin precursor               | n[145]GNVAEGETK[272]PDPDVTER       | 3 | 701.3583  | 3.82  | 0.196 |
| 58 | IPI00022488 | 1 | 62.8 | 0.8  | 0.14 | 222 | 86 | HPX Hemopexin precursor               | n[145]FDPVRGEVPPR                  | 2 | 706.892   | 2.391 | 0.104 |
| 58 | IPI00022488 | 1 | 62.8 | 0.8  | 0.14 | 222 | 86 | HPX Hemopexin precursor               | n[145]CSPHLVLSALTSNDHGATY          | 3 | 726.0143  | 3.028 | 0.353 |
| 58 | IPI00022488 | 1 | 62.8 | 0.8  | 0.14 | 222 | 86 | HPX Hemopexin precursor               | n[145]LLQDEFFGIPSPLDAAVECHR        | 4 | 625.0639  | 2.273 | 0.136 |
| 58 | IPI00022488 | 1 | 62.8 | 0.8  | 0.14 | 222 | 86 | HPX Hemopexin precursor               | EWFWDLATGTM[147]K                  | 2 | 890.94    | 2.121 | 0.222 |
| 58 | IPI00022488 | 1 | 62.8 | 0.8  | 0.14 | 222 | 86 | HPX Hemopexin precursor               | n[145]FDPVR                        | 2 | 389.2224  | 1.747 | 0.08  |
| 58 | IPI00022488 | 1 | 62.8 | 0.8  | 0.14 | 222 | 86 | HPX Hemopexin precursor               | GEFVWK                             | 2 | 523.2951  | 2.264 | 0.092 |
| 58 | IPI00022488 | 1 | 62.8 | 0.8  | 0.14 | 222 | 86 | HPX Hemopexin precursor               | EVGTPHGIILDSVDAAFICPGSSR           | 3 | 876.4367  | 2.756 | 0.253 |
| 58 | IPI00022488 | 1 | 62.8 | 0.8  | 0.14 | 222 | 86 | HPX Hemopexin precursor               | n[145]GEFVWK[272]                  | 2 | 527.3022  | 2.517 | 0.052 |
| 58 | IPI00022488 | 1 | 62.8 | 0.8  | 0.14 | 222 | 86 | HPX Hemopexin precursor               | n[145]CSPHLVLSALTSNDHGATYA         | 3 | 749.6933  | 2.823 | 0.389 |

|    |             |   |      |      |      |     |    |                                     |                            |   |          |       |       |
|----|-------------|---|------|------|------|-----|----|-------------------------------------|----------------------------|---|----------|-------|-------|
| 58 | IPI00022488 | 1 | 62.8 | 0.8  | 0.14 | 222 | 86 | HPX Hemopexin precursor             | EIISER                     | 1 | 886.4993 | 1.844 | 0.112 |
| 58 | IPI00022488 | 1 | 62.8 | 0.8  | 0.14 | 222 | 86 | HPX Hemopexin precursor             | n[145]ALPQPQNVTSLLGCTH     | 3 | 623.6541 | 2.409 | 0.115 |
| 58 | IPI00022488 | 1 | 62.8 | 0.8  | 0.14 | 222 | 86 | HPX Hemopexin precursor             | VAEGETKDPDVTER             | 3 | 641.6655 | 2.398 | 0.384 |
| 58 | IPI00022488 | 1 | 62.8 | 0.8  | 0.14 | 222 | 86 | HPX Hemopexin precursor             | n[145]YCFQGNQFLR           | 2 | 733.3455 | 3.305 | 0.424 |
| 58 | IPI00022488 | 1 | 62.8 | 0.8  | 0.14 | 222 | 86 | HPX Hemopexin precursor             | n[145]EK[272]GYPK[272]     | 3 | 385.2362 | 2.004 | 0.145 |
| 58 | IPI00022488 | 1 | 62.8 | 0.8  | 0.14 | 222 | 86 | HPX Hemopexin precursor             | n[145]YYCFQGNQFL           | 2 | 736.8266 | 2.404 | 0.451 |
| 58 | IPI00022488 | 1 | 62.8 | 0.8  | 0.14 | 222 | 86 | HPX Hemopexin precursor             | n[145]VTSLLGCTH            | 2 | 560.7842 | 2.93  | 0.331 |
| 58 | IPI00022488 | 1 | 62.8 | 0.8  | 0.14 | 222 | 86 | HPX Hemopexin precursor             | YYCFQGNQFLR                | 2 | 812.8736 | 1.748 | 0.121 |
| 58 | IPI00022488 | 1 | 62.8 | 0.8  | 0.14 | 222 | 86 | HPX Hemopexin precursor             | n[145]YYCFQGNQF            | 2 | 680.2846 | 2.816 | 0.374 |
| 58 | IPI00022488 | 1 | 62.8 | 0.8  | 0.14 | 222 | 86 | HPX Hemopexin precursor             | EKGYPK                     | 2 | 571.3401 | 2.166 | 0.125 |
| 58 | IPI00022488 | 1 | 62.8 | 0.8  | 0.14 | 222 | 86 | HPX Hemopexin precursor             | n[145]VWVYPPEK             | 2 | 651.3724 | 2.518 | 0.194 |
| 58 | IPI00022488 | 1 | 62.8 | 0.8  | 0.14 | 222 | 86 | HPX Hemopexin precursor             | n[145]TSDNHGATYAFSGTHYWR   | 3 | 739.0073 | 3.59  | 0.355 |
| 58 | IPI00022488 | 1 | 62.8 | 0.8  | 0.14 | 222 | 86 | HPX Hemopexin precursor             | n[145]IHLM[147]AGR         | 3 | 319.8522 | 2.272 | 0.149 |
| 58 | IPI00022488 | 1 | 62.8 | 0.8  | 0.14 | 222 | 86 | HPX Hemopexin precursor             | GALCM[147]EK               | 2 | 547.2638 | 2.368 | 0.26  |
| 58 | IPI00022488 | 1 | 62.8 | 0.8  | 0.14 | 222 | 86 | HPX Hemopexin precursor             | n[145]DYFM[147]PCPGR       | 3 | 431.1845 | 1.815 | 0.025 |
| 58 | IPI00022488 | 1 | 62.8 | 0.8  | 0.14 | 222 | 86 | HPX Hemopexin precursor             | NVAEGETKDPDVTER            | 3 | 679.6798 | 2.954 | 0.153 |
| 58 | IPI00022488 | 1 | 62.8 | 0.8  | 0.14 | 222 | 86 | HPX Hemopexin precursor             | n[145]ETK[272]PDPDVTER     | 2 | 787.9169 | 3.212 | 0.196 |
| 58 | IPI00022488 | 1 | 62.8 | 0.8  | 0.14 | 222 | 86 | HPX Hemopexin precursor             | n[145]GECQAEGVLFQGD        | 3 | 615.9509 | 2.307 | 0.01  |
| 58 | IPI00022488 | 1 | 62.8 | 0.8  | 0.14 | 222 | 86 | HPX Hemopexin precursor             | n[145]SVFLIK[272]          | 2 | 497.8306 | 2.606 | 0.137 |
| 58 | IPI00022488 | 1 | 62.8 | 0.8  | 0.14 | 222 | 86 | HPX Hemopexin precursor             | n[145]AAVECHR              | 2 | 488.2347 | 2.751 | 0.135 |
| 58 | IPI00022488 | 1 | 62.8 | 0.8  | 0.14 | 222 | 86 | HPX Hemopexin precursor             | n[145]EVGTPHGIILSDVDA      | 2 | 869.4606 | 3.292 | 0.383 |
| 58 | IPI00022488 | 1 | 62.8 | 0.8  | 0.14 | 222 | 86 | HPX Hemopexin precursor             | SVFLIK                     | 2 | 493.8235 | 2.285 | 0.18  |
| 58 | IPI00022488 | 1 | 62.8 | 0.8  | 0.14 | 222 | 86 | HPX Hemopexin precursor             | n[145]CSPHLVLSALTSNHGATYAF | 3 | 798.7161 | 2.473 | 0.296 |
| 58 | IPI00022488 | 1 | 62.8 | 0.8  | 0.14 | 222 | 86 | HPX Hemopexin precursor             | n[145]VWVYPPEKK            | 3 | 523.9807 | 2.337 | 0.131 |
| 58 | IPI00022488 | 1 | 62.8 | 0.8  | 0.14 | 222 | 86 | HPX Hemopexin precursor             | n[145]GEVPPRYPR            | 2 | 607.8418 | 2.393 | 0.046 |
| 58 | IPI00022488 | 1 | 62.8 | 0.8  | 0.14 | 222 | 86 | HPX Hemopexin precursor             | n[145]GALCM[147]EK[272]    | 2 | 551.2709 | 2.206 | 0.187 |
| 58 | IPI00022488 | 1 | 62.8 | 0.8  | 0.14 | 222 | 86 | HPX Hemopexin precursor             | n[145]CSPHLVLSALTS         | 2 | 766.8821 | 2.561 | 0.358 |
| 58 | IPI00022488 | 1 | 62.8 | 0.8  | 0.14 | 222 | 86 | HPX Hemopexin precursor             | n[145]AAFCIPGSSR           | 2 | 599.7951 | 2.741 | 0.123 |
| 58 | IPI00022488 | 1 | 62.8 | 0.8  | 0.14 | 222 | 86 | HPX Hemopexin precursor             | n[145]EK[272]GYPK[272]     | 2 | 577.3507 | 1.922 | 0.131 |
| 58 | IPI00022488 | 1 | 62.8 | 0.8  | 0.14 | 222 | 86 | HPX Hemopexin precursor             | n[145]YFM[147]PCPGR        | 2 | 588.7597 | 1.594 | 0.327 |
| 58 | IPI00022488 | 1 | 62.8 | 0.8  | 0.14 | 222 | 86 | HPX Hemopexin precursor             | n[145]LYCYSVDEK[272]       | 2 | 727.3509 | 2.425 | 0.18  |
| 58 | IPI00022488 | 1 | 62.8 | 0.8  | 0.14 | 222 | 86 | HPX Hemopexin precursor             | ETKDPDVTER                 | 2 | 783.9098 | 2.186 | 0.184 |
| 58 | IPI00022488 | 1 | 62.8 | 0.8  | 0.14 | 222 | 86 | HPX Hemopexin precursor             | n[145]CYSVDEK[272]         | 2 | 589.2772 | 1.64  | 0.208 |
| 58 | IPI00022488 | 1 | 62.8 | 0.8  | 0.14 | 222 | 86 | HPX Hemopexin precursor             | n[145]ELISER               | 1 | 890.5064 | 1.565 | 0.089 |
| 58 | IPI00022488 | 1 | 62.8 | 0.8  | 0.14 | 222 | 86 | HPX Hemopexin precursor             | n[145]EVGTPHGIILSD         | 2 | 798.4235 | 2.709 | 0.263 |
| 58 | IPI00022488 | 1 | 62.8 | 0.8  | 0.14 | 222 | 86 | HPX Hemopexin precursor             | GEFVWK[272]                | 2 | 525.2987 | 1.713 | 0.028 |
| 58 | IPI00022488 | 1 | 62.8 | 0.8  | 0.14 | 222 | 86 | HPX Hemopexin precursor             | CYSVDEK                    | 2 | 585.2701 | 1.265 | 0.277 |
| 58 | IPI00022488 | 1 | 62.8 | 0.8  | 0.14 | 222 | 86 | HPX Hemopexin precursor             | n[145]WKNFSPVDAAFR         | 3 | 606.9972 | 3.04  | 0.134 |
| 58 | IPI00022488 | 1 | 62.8 | 0.8  | 0.14 | 222 | 86 | HPX Hemopexin precursor             | n[145]CSPHLVLSAL           | 2 | 615.3288 | 2.134 | 0.149 |
| 58 | IPI00022488 | 1 | 62.8 | 0.8  | 0.14 | 222 | 86 | HPX Hemopexin precursor             | n[145]ICPGSSR              | 2 | 455.2238 | 1.721 | 0.109 |
| 58 | IPI00022488 | 1 | 62.8 | 0.8  | 0.14 | 222 | 86 | HPX Hemopexin precursor             | LYCYSVDEK                  | 2 | 723.3438 | 1.995 | 0.057 |
| 58 | IPI00022488 | 1 | 62.8 | 0.8  | 0.14 | 222 | 86 | HPX Hemopexin precursor             | n[145]CSPHLVLSALTS         | 2 | 709.3686 | 1.835 | 0.126 |
| 58 | IPI00022488 | 1 | 62.8 | 0.8  | 0.14 | 222 | 86 | HPX Hemopexin precursor             | n[145]EVGTPHGIILD          | 2 | 647.8598 | 2.123 | 0.072 |
| 58 | IPI00022488 | 1 | 62.8 | 0.8  | 0.14 | 222 | 86 | HPX Hemopexin precursor             | n[145]EVGTPHGIILSDVDA      | 2 | 833.9421 | 2.183 | 0.065 |
| 59 | IPI00022731 | 1 | 16.5 | 0.67 | 0.03 | 4   | 3  | APOC4 Apolipoprotein C-IV precursor | n[145]GFMQTYDDHLR          | 3 | 563.9319 | 4.57  | 0.498 |
| 59 | IPI00022731 | 1 | 16.5 | 0.67 | 0.03 | 4   | 3  | APOC4 Apolipoprotein C-IV precursor | n[145]GFM[147]QTYDDHLR     | 3 | 569.2635 | 2.275 | 0.177 |
| 59 | IPI00022731 | 1 | 16.5 | 0.67 | 0.03 | 4   | 3  | APOC4 Apolipoprotein C-IV precursor | n[145]ELLETVVNR            | 2 | 608.8545 | 2.64  | 0.1   |
| 60 | IPI00022733 | 1 | 4.9  | 1.01 | 0.01 | 4   | 3  | PLTP 45 kDa protein                 | n[145]GAFFPLTER            | 2 | 591.3254 | 3.024 | 0.282 |

|    |             |   |      |      |      |    |    |                                      |                              |   |           |       |       |
|----|-------------|---|------|------|------|----|----|--------------------------------------|------------------------------|---|-----------|-------|-------|
| 60 | IPI00022733 | 1 | 4.9  | 1.01 | 0.01 | 4  | 3  | PLTP 45 kDa protein                  | GAFFPLTER                    | 2 | 589.3219  | 2.632 | 0.206 |
| 60 | IPI00022733 | 1 | 4.9  | 1.01 | 0.01 | 4  | 3  | PLTP 45 kDa protein                  | n[145]AVEPQLQEEER            | 2 | 736.3791  | 2.503 | 0.273 |
| 61 | IPI00022895 | 1 | 37.6 | 0.77 | 0.12 | 98 | 35 | A1BG Alpha-1B-glycoprotein precursor | n[145]LLELTGPK[272]          | 1 | 1158.7337 | 2.948 | 0.271 |
| 61 | IPI00022895 | 1 | 37.6 | 0.77 | 0.12 | 98 | 35 | A1BG Alpha-1B-glycoprotein precursor | n[145]CEGPIPDVTFELLR         | 2 | 889.9505  | 3.979 | 0.454 |
| 61 | IPI00022895 | 1 | 37.6 | 0.77 | 0.12 | 98 | 35 | A1BG Alpha-1B-glycoprotein precursor | n[145]HQFLLTGDTQGR           | 2 | 758.9031  | 3.89  | 0.429 |
| 61 | IPI00022895 | 1 | 37.6 | 0.77 | 0.12 | 98 | 35 | A1BG Alpha-1B-glycoprotein precursor | n[145]TPGAAANLELIFVGPQHAGNYR | 2 | 1220.6463 | 5.434 | 0.557 |
| 61 | IPI00022895 | 1 | 37.6 | 0.77 | 0.12 | 98 | 35 | A1BG Alpha-1B-glycoprotein precursor | NGVAQEPVHLDSPAIK             | 3 | 652.3618  | 4.991 | 0.514 |
| 61 | IPI00022895 | 1 | 37.6 | 0.77 | 0.12 | 98 | 35 | A1BG Alpha-1B-glycoprotein precursor | n[145]AVALGDGGHYTCR          | 3 | 503.9068  | 4.698 | 0.402 |
| 61 | IPI00022895 | 1 | 37.6 | 0.77 | 0.12 | 98 | 35 | A1BG Alpha-1B-glycoprotein precursor | n[145]GAAANLELIFVGPQHAGNYR   | 3 | 748.0665  | 5.854 | 0.468 |
| 61 | IPI00022895 | 1 | 37.6 | 0.77 | 0.12 | 98 | 35 | A1BG Alpha-1B-glycoprotein precursor | n[145]HQFLLTGDTQGR           | 3 | 506.2711  | 4.132 | 0.368 |
| 61 | IPI00022895 | 1 | 37.6 | 0.77 | 0.12 | 98 | 35 | A1BG Alpha-1B-glycoprotein precursor | n[145]NGVAQEPVHLDSPAIK[272]  | 3 | 655.0332  | 4.818 | 0.506 |
| 61 | IPI00022895 | 1 | 37.6 | 0.77 | 0.12 | 98 | 35 | A1BG Alpha-1B-glycoprotein precursor | n[145]TPGAAANLELIFVGPQHAGNYR | 3 | 814.1     | 6.481 | 0.503 |
| 61 | IPI00022895 | 1 | 37.6 | 0.77 | 0.12 | 98 | 35 | A1BG Alpha-1B-glycoprotein precursor | n[145]LELHVDGPPRPQLR         | 3 | 623.3589  | 2.405 | 0.144 |
| 61 | IPI00022895 | 1 | 37.6 | 0.77 | 0.12 | 98 | 35 | A1BG Alpha-1B-glycoprotein precursor | n[145]LELHVDGPPRPQLR         | 4 | 467.771   | 1.971 | 0.267 |
| 61 | IPI00022895 | 1 | 37.6 | 0.77 | 0.12 | 98 | 35 | A1BG Alpha-1B-glycoprotein precursor | n[145]JFFHLNAVALGDGGHYTCR    | 4 | 571.0336  | 3.344 | 0.279 |
| 61 | IPI00022895 | 1 | 37.6 | 0.77 | 0.12 | 98 | 35 | A1BG Alpha-1B-glycoprotein precursor | n[145]LETPDFQLFK[272]        | 2 | 763.4289  | 1.763 | 0.171 |
| 61 | IPI00022895 | 1 | 37.6 | 0.77 | 0.12 | 98 | 35 | A1BG Alpha-1B-glycoprotein precursor | LELHVDGPPRPQLR               | 3 | 622.0232  | 2.029 | 0.11  |
| 61 | IPI00022895 | 1 | 37.6 | 0.77 | 0.12 | 98 | 35 | A1BG Alpha-1B-glycoprotein precursor | LLELTGPK                     | 2 | 575.8634  | 2.677 | 0.23  |
| 61 | IPI00022895 | 1 | 37.6 | 0.77 | 0.12 | 98 | 35 | A1BG Alpha-1B-glycoprotein precursor | n[145]CLAPLEGAR              | 2 | 560.2922  | 2.449 | 0.213 |
| 61 | IPI00022895 | 1 | 37.6 | 0.77 | 0.12 | 98 | 35 | A1BG Alpha-1B-glycoprotein precursor | n[145]LLELTGPK[272]          | 2 | 579.8705  | 1.435 | 0.094 |
| 61 | IPI00022895 | 1 | 37.6 | 0.77 | 0.12 | 98 | 35 | A1BG Alpha-1B-glycoprotein precursor | LETPDFQLFK                   | 2 | 759.4218  | 2.683 | 0.228 |
| 61 | IPI00022895 | 1 | 37.6 | 0.77 | 0.12 | 98 | 35 | A1BG Alpha-1B-glycoprotein precursor | HHGESSQVLHPGNK               | 4 | 452.4894  | 2.85  | 0.375 |
| 61 | IPI00022895 | 1 | 37.6 | 0.77 | 0.12 | 98 | 35 | A1BG Alpha-1B-glycoprotein precursor | n[145]GVTFLLR                | 2 | 475.3012  | 3.137 | 0.177 |
| 61 | IPI00022895 | 1 | 37.6 | 0.77 | 0.12 | 98 | 35 | A1BG Alpha-1B-glycoprotein precursor | n[145]SWVPHTFESESDPVELLVAES  | 2 | 1308.1535 | 2.511 | 0.453 |
| 61 | IPI00022895 | 1 | 37.6 | 0.77 | 0.12 | 98 | 35 | A1BG Alpha-1B-glycoprotein precursor | LELHVDGPPRPQLR               | 4 | 466.7693  | 2.489 | 0.017 |
| 61 | IPI00022895 | 1 | 37.6 | 0.77 | 0.12 | 98 | 35 | A1BG Alpha-1B-glycoprotein precursor | n[145]HHGESSQVLHPGNK[272]    | 4 | 454.493   | 3.924 | 0.32  |
| 61 | IPI00022895 | 1 | 37.6 | 0.77 | 0.12 | 98 | 35 | A1BG Alpha-1B-glycoprotein precursor | LELHVDGPPRPQLR               | 2 | 932.5312  | 2.423 | 0.4   |
| 61 | IPI00022895 | 1 | 37.6 | 0.77 | 0.12 | 98 | 35 | A1BG Alpha-1B-glycoprotein precursor | ELLVPR                       | 1 | 866.5459  | 1.803 | 0.173 |
| 61 | IPI00022895 | 1 | 37.6 | 0.77 | 0.12 | 98 | 35 | A1BG Alpha-1B-glycoprotein precursor | n[145]LELHVDGPPRPQLR         | 2 | 934.5348  | 2.605 | 0.135 |
| 61 | IPI00022895 | 1 | 37.6 | 0.77 | 0.12 | 98 | 35 | A1BG Alpha-1B-glycoprotein precursor | n[145]ELLVPR                 | 1 | 870.553   | 1.852 | 0.013 |
| 61 | IPI00022895 | 1 | 37.6 | 0.77 | 0.12 | 98 | 35 | A1BG Alpha-1B-glycoprotein precursor | n[145]ELLVPR                 | 2 | 435.7801  | 2.007 | 0.014 |
| 61 | IPI00022895 | 1 | 37.6 | 0.77 | 0.12 | 98 | 35 | A1BG Alpha-1B-glycoprotein precursor | n[145]LELIFVGPQHAGNYR        | 3 | 620.0079  | 3.106 | 0.309 |
| 61 | IPI00022895 | 1 | 37.6 | 0.77 | 0.12 | 98 | 35 | A1BG Alpha-1B-glycoprotein precursor | GVTFLLR                      | 2 | 473.2977  | 2.06  | 0.015 |
| 61 | IPI00022895 | 1 | 37.6 | 0.77 | 0.12 | 98 | 35 | A1BG Alpha-1B-glycoprotein precursor | n[145]AVALGDGGHYTCR          | 2 | 755.3566  | 4.12  | 0.344 |
| 61 | IPI00022895 | 1 | 37.6 | 0.77 | 0.12 | 98 | 35 | A1BG Alpha-1B-glycoprotein precursor | n[145]VAPLSGVDLQRL           | 2 | 723.4153  | 3.275 | 0.287 |
| 61 | IPI00022895 | 1 | 37.6 | 0.77 | 0.12 | 98 | 35 | A1BG Alpha-1B-glycoprotein precursor | n[145]VTFELLR                | 2 | 511.3118  | 2.532 | 0.179 |
| 61 | IPI00022895 | 1 | 37.6 | 0.77 | 0.12 | 98 | 35 | A1BG Alpha-1B-glycoprotein precursor | HHGESSQVLHPGNK               | 3 | 602.9835  | 2.011 | 0.171 |
| 61 | IPI00022895 | 1 | 37.6 | 0.77 | 0.12 | 98 | 35 | A1BG Alpha-1B-glycoprotein precursor | LELHVD                       | 2 | 433.2426  | 1.325 | 0.139 |
| 62 | IPI00022937 | 1 | 3.6  | 1.07 | 0.46 | 10 | 6  | F5 Coagulation factor V              | SQHLDNFSNQIGK                | 3 | 589.9761  | 4.232 | 0.342 |
| 62 | IPI00022937 | 1 | 3.6  | 1.07 | 0.46 | 10 | 6  | F5 Coagulation factor V              | n[145]SQHLDNFSNQIGK[272]     | 3 | 592.6475  | 4.141 | 0.326 |
| 62 | IPI00022937 | 1 | 3.6  | 1.07 | 0.46 | 10 | 6  | F5 Coagulation factor V              | DIHSLIGPLLICQK               | 3 | 645.0302  | 4.734 | 0.255 |
| 62 | IPI00022937 | 1 | 3.6  | 1.07 | 0.46 | 10 | 6  | F5 Coagulation factor V              | n[145]DIHSLIGPLLICQK[272]    | 3 | 647.7016  | 4.209 | 0.343 |
| 62 | IPI00022937 | 1 | 3.6  | 1.07 | 0.46 | 10 | 6  | F5 Coagulation factor V              | n[145]FCENPDEVK[272]R        | 3 | 524.2581  | 2.569 | 0.321 |
| 62 | IPI00022937 | 1 | 3.6  | 1.07 | 0.46 | 10 | 6  | F5 Coagulation factor V              | n[145]YLDSTFTK[272]          | 2 | 631.8472  | 1.968 | 0.112 |
| 62 | IPI00022937 | 1 | 3.6  | 1.07 | 0.46 | 10 | 6  | F5 Coagulation factor V              | SK[272]K[272]                | 2 | 395.7731  | 0.913 | 0.136 |
| 62 | IPI00022937 | 1 | 3.6  | 1.07 | 0.46 | 10 | 6  | F5 Coagulation factor V              | n[145]NLASRPY                | 2 | 482.7703  | 2.083 | 0.1   |
| 62 | IPI00022937 | 1 | 3.6  | 1.07 | 0.46 | 10 | 6  | F5 Coagulation factor V              | LLLLK                        | 2 | 440.3232  | 1.8   | 1     |
| 62 | IPI00022937 | 1 | 3.6  | 1.07 | 0.46 | 10 | 6  | F5 Coagulation factor V              | FEGNTNTK                     | 2 | 595.8119  | 2.135 | 0.003 |

|    |             |   |      |      |      |    |    |                                                          |                                |   |           |       |       |
|----|-------------|---|------|------|------|----|----|----------------------------------------------------------|--------------------------------|---|-----------|-------|-------|
| 62 | IPI00022937 | 1 | 3.6  | 1.07 | 0.46 | 10 | 6  | F5 Coagulation factor V                                  | SPLR                           | 1 | 612.3828  | 1.332 | 0.125 |
| 62 | IPI00022937 | 1 | 3.6  | 1.07 | 0.46 | 10 | 6  | F5 Coagulation factor V                                  | EM[147]K                       | 1 | 703.3808  | 1.121 | 0.072 |
| 63 | IPI00023019 | 1 | 10   | 0.89 | 0.04 | 6  | 5  | SHBG Isoform 1 of Sex hormone-binding globulin precursor | n[145]IALGGLLFPASNLR           | 2 | 793.481   | 4.124 | 0.423 |
| 63 | IPI00023019 | 1 | 10   | 0.89 | 0.04 | 6  | 5  | SHBG Isoform 1 of Sex hormone-binding globulin precursor | n[145]LPLVPALDGCLR             | 2 | 728.9105  | 2.182 | 0.076 |
| 63 | IPI00023019 | 1 | 10   | 0.89 | 0.04 | 6  | 5  | SHBG Isoform 1 of Sex hormone-binding globulin precursor | LVPALDGCLR                     | 2 | 621.8385  | 2.093 | 0.245 |
| 63 | IPI00023019 | 1 | 10   | 0.89 | 0.04 | 6  | 5  | SHBG Isoform 1 of Sex hormone-binding globulin precursor | LPLVPALDGCLR                   | 2 | 726.9069  | 1.79  | 0.019 |
| 63 | IPI00023019 | 1 | 10   | 0.89 | 0.04 | 6  | 5  | SHBG Isoform 1 of Sex hormone-binding globulin precursor | n[145]LVPALDGCLR               | 2 | 623.8421  | 2.205 | 0.147 |
| 64 | IPI00023673 | 1 | 4.7  | 0.88 | 0.09 | 4  | 4  | LGALS3BP Galectin-3-binding protein precursor            | KSQLVYQSR                      | 3 | 463.6052  | 3.169 | 0.22  |
| 64 | IPI00023673 | 1 | 4.7  | 0.88 | 0.09 | 4  | 4  | LGALS3BP Galectin-3-binding protein precursor            | STHTLDLSR                      | 2 | 585.3173  | 2.974 | 0.341 |
| 64 | IPI00023673 | 1 | 4.7  | 0.88 | 0.09 | 4  | 4  | LGALS3BP Galectin-3-binding protein precursor            | n[145]SQLVYQSR                 | 2 | 562.8127  | 3.275 | 0.239 |
| 64 | IPI00023673 | 1 | 4.7  | 0.88 | 0.09 | 4  | 4  | LGALS3BP Galectin-3-binding protein precursor            | n[145]YFYSR                    | 2 | 440.2277  | 1.748 | 0.039 |
| 64 | IPI00023673 | 1 | 4.7  | 0.88 | 0.09 | 4  | 4  | LGALS3BP Galectin-3-binding protein precursor            | SVK[272]                       | 1 | 617.4104  | 0.88  | 0.378 |
| 65 | IPI00024825 | 1 | 2.5  | 0.55 | 0.15 | 9  | 7  | PRG4 Isoform A of Proteoglycan-4 precursor               | GVLHNEVK                       | 2 | 588.3484  | 2.938 | 0.309 |
| 65 | IPI00024825 | 1 | 2.5  | 0.55 | 0.15 | 9  | 7  | PRG4 Isoform A of Proteoglycan-4 precursor               | n[145]GVLHNEVK[272]            | 3 | 395.2394  | 2.816 | 0.202 |
| 65 | IPI00024825 | 1 | 2.5  | 0.55 | 0.15 | 9  | 7  | PRG4 Isoform A of Proteoglycan-4 precursor               | n[145]QYSPAR                   | 2 | 489.7781  | 1.866 | 0.082 |
| 65 | IPI00024825 | 1 | 2.5  | 0.55 | 0.15 | 9  | 7  | PRG4 Isoform A of Proteoglycan-4 precursor               | n[145]GVLHNEVK[272]            | 2 | 592.3555  | 2.51  | 0.248 |
| 65 | IPI00024825 | 1 | 2.5  | 0.55 | 0.15 | 9  | 7  | PRG4 Isoform A of Proteoglycan-4 precursor               | GVLHNEVK                       | 3 | 392.568   | 2.153 | 0.083 |
| 65 | IPI00024825 | 1 | 2.5  | 0.55 | 0.15 | 9  | 7  | PRG4 Isoform A of Proteoglycan-4 precursor               | ETQSIEK                        | 2 | 557.8088  | 1.812 | 0.012 |
| 65 | IPI00024825 | 1 | 2.5  | 0.55 | 0.15 | 9  | 7  | PRG4 Isoform A of Proteoglycan-4 precursor               | n[145]ETQSIEK[272]             | 2 | 561.8159  | 1.833 | 0.035 |
| 65 | IPI00024825 | 1 | 2.5  | 0.55 | 0.15 | 9  | 7  | PRG4 Isoform A of Proteoglycan-4 precursor               | VYFFK                          | 2 | 492.2893  | 1.735 | 0.167 |
| 65 | IPI00024825 | 1 | 2.5  | 0.55 | 0.15 | 9  | 7  | PRG4 Isoform A of Proteoglycan-4 precursor               | PSLPP                          | 2 | 325.6972  | 1.303 | 0.198 |
| 66 | IPI00025204 | 1 | 6.6  | 0.87 | 0.03 | 9  | 9  | CD5L CD5 antigen-like precursor                          | LADGPGHCK                      | 3 | 408.539   | 2.191 | 0.268 |
| 66 | IPI00025204 | 1 | 6.6  | 0.87 | 0.03 | 9  | 9  | CD5L CD5 antigen-like precursor                          | n[145]LADGPGHCK[272]           | 3 | 411.2104  | 2.399 | 0.252 |
| 66 | IPI00025204 | 1 | 6.6  | 0.87 | 0.03 | 9  | 9  | CD5L CD5 antigen-like precursor                          | n[145]CYGPGVGR                 | 2 | 499.7371  | 2.904 | 0.24  |
| 66 | IPI00025204 | 1 | 6.6  | 0.87 | 0.03 | 9  | 9  | CD5L CD5 antigen-like precursor                          | n[145]LADGPGHCK[272]           | 2 | 616.3119  | 2.67  | 0.295 |
| 66 | IPI00025204 | 1 | 6.6  | 0.87 | 0.03 | 9  | 9  | CD5L CD5 antigen-like precursor                          | LEVLHK                         | 2 | 509.8241  | 2.284 | 0.123 |
| 66 | IPI00025204 | 1 | 6.6  | 0.87 | 0.03 | 9  | 9  | CD5L CD5 antigen-like precursor                          | n[145]LEVLHK[272]              | 2 | 513.8312  | 2.263 | 0.141 |
| 66 | IPI00025204 | 1 | 6.6  | 0.87 | 0.03 | 9  | 9  | CD5L CD5 antigen-like precursor                          | n[145]LEVLHK[272]              | 3 | 342.8899  | 2.108 | 0.032 |
| 66 | IPI00025204 | 1 | 6.6  | 0.87 | 0.03 | 9  | 9  | CD5L CD5 antigen-like precursor                          | LADGPGHCK                      | 2 | 612.3048  | 1.972 | 0.094 |
| 66 | IPI00025204 | 1 | 6.6  | 0.87 | 0.03 | 9  | 9  | CD5L CD5 antigen-like precursor                          | LEVLHK                         | 3 | 340.2185  | 1.847 | 0.01  |
| 67 | IPI00025426 | 1 | 21.4 | 1.02 | 0.04 | 32 | 27 | PZP Isoform 1 of Pregnancy zone protein precursor        | AVGYLITGYQR                    | 2 | 690.8854  | 3.71  | 0.44  |
| 67 | IPI00025426 | 1 | 21.4 | 1.02 | 0.04 | 32 | 27 | PZP Isoform 1 of Pregnancy zone protein precursor        | GSFALSFVPESDVAPIAR             | 2 | 1002.0335 | 4.66  | 0.456 |
| 67 | IPI00025426 | 1 | 21.4 | 1.02 | 0.04 | 32 | 27 | PZP Isoform 1 of Pregnancy zone protein precursor        | M[147]VSGFIPLKPTVK             | 2 | 927.0578  | 2.248 | 0.234 |
| 67 | IPI00025426 | 1 | 21.4 | 1.02 | 0.04 | 32 | 27 | PZP Isoform 1 of Pregnancy zone protein precursor        | n[145]ATVLNLYLPK[272]          | 2 | 653.9023  | 1.422 | 0.077 |
| 67 | IPI00025426 | 1 | 21.4 | 1.02 | 0.04 | 32 | 27 | PZP Isoform 1 of Pregnancy zone protein precursor        | n[145]MVSGFIPLK[272]PTVK[272]  | 2 | 925.0709  | 3.962 | 0.447 |
| 67 | IPI00025426 | 1 | 21.4 | 1.02 | 0.04 | 32 | 27 | PZP Isoform 1 of Pregnancy zone protein precursor        | MVSGFIPLKPTVK                  | 3 | 613.0426  | 2.28  | 0.11  |
| 67 | IPI00025426 | 1 | 21.4 | 1.02 | 0.04 | 32 | 27 | PZP Isoform 1 of Pregnancy zone protein precursor        | SGTHTLPVESGDM[147]K            | 3 | 585.6296  | 2.796 | 0.425 |
| 67 | IPI00025426 | 1 | 21.4 | 1.02 | 0.04 | 32 | 27 | PZP Isoform 1 of Pregnancy zone protein precursor        | TEPQYMLVPSLLHTEAPK             | 3 | 811.7785  | 5.251 | 0.482 |
| 67 | IPI00025426 | 1 | 21.4 | 1.02 | 0.04 | 32 | 27 | PZP Isoform 1 of Pregnancy zone protein precursor        | VQTVPQTCDGHK                   | 3 | 546.9412  | 4.632 | 0.516 |
| 67 | IPI00025426 | 1 | 21.4 | 1.02 | 0.04 | 32 | 27 | PZP Isoform 1 of Pregnancy zone protein precursor        | n[145]AGAFCLSEADGLISSTASLR     | 3 | 739.3651  | 2.89  | 0.13  |
| 67 | IPI00025426 | 1 | 21.4 | 1.02 | 0.04 | 32 | 27 | PZP Isoform 1 of Pregnancy zone protein precursor        | n[145]MVSGFIPLK[272]PTVK[272]  | 3 | 617.0497  | 2.357 | 0.273 |
| 67 | IPI00025426 | 1 | 21.4 | 1.02 | 0.04 | 32 | 27 | PZP Isoform 1 of Pregnancy zone protein precursor        | n[145]SGTHTLPVESGDM[147]K[272] | 3 | 588.301   | 4.082 | 0.469 |
| 67 | IPI00025426 | 1 | 21.4 | 1.02 | 0.04 | 32 | 27 | PZP Isoform 1 of Pregnancy zone protein precursor        | n[145]VQTVPQTCDGHK[272]        | 3 | 549.6126  | 2.739 | 0.408 |
| 67 | IPI00025426 | 1 | 21.4 | 1.02 | 0.04 | 32 | 27 | PZP Isoform 1 of Pregnancy zone protein precursor        | ATVLNLYLPK                     | 2 | 649.8952  | 2.663 | 0.344 |
| 67 | IPI00025426 | 1 | 21.4 | 1.02 | 0.04 | 32 | 27 | PZP Isoform 1 of Pregnancy zone protein precursor        | M[147]VSGFIPLKPTVK             | 3 | 618.3743  | 1.861 | 0.035 |
| 67 | IPI00025426 | 1 | 21.4 | 1.02 | 0.04 | 32 | 27 | PZP Isoform 1 of Pregnancy zone protein precursor        | n[145]HQDGSYSTFGER             | 3 | 509.903   | 2.865 | 0.341 |
| 67 | IPI00025426 | 1 | 21.4 | 1.02 | 0.04 | 32 | 27 | PZP Isoform 1 of Pregnancy zone protein precursor        | n[145]IREEGTDLEVTANR           | 3 | 582.9749  | 4.454 | 0.312 |
| 67 | IPI00025426 | 1 | 21.4 | 1.02 | 0.04 | 32 | 27 | PZP Isoform 1 of Pregnancy zone protein precursor        | SSGSLNNAIK                     | 2 | 692.4014  | 3.62  | 0.366 |

|    |             |   |      |      |      |    |    |                                                   |                                     |   |           |       |       |
|----|-------------|---|------|------|------|----|----|---------------------------------------------------|-------------------------------------|---|-----------|-------|-------|
| 67 | IPI00025426 | 1 | 21.4 | 1.02 | 0.04 | 32 | 27 | PZP Isoform 1 of Pregnancy zone protein precursor | n[145]AVGYLITGYQR                   | 2 | 692.8889  | 3.767 | 0.41  |
| 67 | IPI00025426 | 1 | 21.4 | 1.02 | 0.04 | 32 | 27 | PZP Isoform 1 of Pregnancy zone protein precursor | n[145]SSGSLLNNAIK[272]              | 2 | 696.4085  | 3.957 | 0.357 |
| 67 | IPI00025426 | 1 | 21.4 | 1.02 | 0.04 | 32 | 27 | PZP Isoform 1 of Pregnancy zone protein precursor | n[145]YGAATFTR                      | 2 | 515.7756  | 2.604 | 0.238 |
| 67 | IPI00025426 | 1 | 21.4 | 1.02 | 0.04 | 32 | 27 | PZP Isoform 1 of Pregnancy zone protein precursor | EGTHGSHVYTK                         | 3 | 499.2599  | 3.063 | 0.23  |
| 67 | IPI00025426 | 1 | 21.4 | 1.02 | 0.04 | 32 | 27 | PZP Isoform 1 of Pregnancy zone protein precursor | n[145]TEPQYM[147]VLVPSLLHTEAPK[272] | 3 | 819.7816  | 5.043 | 0.379 |
| 67 | IPI00025426 | 1 | 21.4 | 1.02 | 0.04 | 32 | 27 | PZP Isoform 1 of Pregnancy zone protein precursor | n[145]DNGCFR                        | 2 | 451.1925  | 2.125 | 0.346 |
| 67 | IPI00025426 | 1 | 21.4 | 1.02 | 0.04 | 32 | 27 | PZP Isoform 1 of Pregnancy zone protein precursor | n[145]JSEITNIVSK[272]               | 2 | 696.4211  | 3.295 | 0.336 |
| 67 | IPI00025426 | 1 | 21.4 | 1.02 | 0.04 | 32 | 27 | PZP Isoform 1 of Pregnancy zone protein precursor | n[145]AFQPFVVELTM[147]PYSVIR        | 3 | 735.7227  | 3.847 | 0.203 |
| 67 | IPI00025426 | 1 | 21.4 | 1.02 | 0.04 | 32 | 27 | PZP Isoform 1 of Pregnancy zone protein precursor | n[145]TEPQYMVLVPSLLHTEAPK[272]      | 3 | 814.4499  | 5.168 | 0.322 |
| 67 | IPI00025426 | 1 | 21.4 | 1.02 | 0.04 | 32 | 27 | PZP Isoform 1 of Pregnancy zone protein precursor | YGAATFTR                            | 1 | 1026.5368 | 2.424 | 0.24  |
| 67 | IPI00025426 | 1 | 21.4 | 1.02 | 0.04 | 32 | 27 | PZP Isoform 1 of Pregnancy zone protein precursor | n[145]VQTVPQTCDGHK[272]             | 2 | 823.9153  | 2.91  | 0.422 |
| 67 | IPI00025426 | 1 | 21.4 | 1.02 | 0.04 | 32 | 27 | PZP Isoform 1 of Pregnancy zone protein precursor | DNGCFR                              | 2 | 449.1889  | 2.036 | 0.331 |
| 67 | IPI00025426 | 1 | 21.4 | 1.02 | 0.04 | 32 | 27 | PZP Isoform 1 of Pregnancy zone protein precursor | SLFTDLVAEK                          | 2 | 701.9007  | 2.844 | 0.253 |
| 67 | IPI00025426 | 1 | 21.4 | 1.02 | 0.04 | 32 | 27 | PZP Isoform 1 of Pregnancy zone protein precursor | TEPQYM[147]VLVPSLLHTEAPK            | 3 | 817.1102  | 4.958 | 0.349 |
| 67 | IPI00025426 | 1 | 21.4 | 1.02 | 0.04 | 32 | 27 | PZP Isoform 1 of Pregnancy zone protein precursor | n[145]YGAATFTR                      | 1 | 1030.5439 | 1.848 | 0.355 |
| 67 | IPI00025426 | 1 | 21.4 | 1.02 | 0.04 | 32 | 27 | PZP Isoform 1 of Pregnancy zone protein precursor | VQTVPQTCDGHK                        | 2 | 819.9082  | 2.677 | 0.245 |
| 67 | IPI00025426 | 1 | 21.4 | 1.02 | 0.04 | 32 | 27 | PZP Isoform 1 of Pregnancy zone protein precursor | n[145]VVSVDENFRPR                   | 3 | 487.9359  | 2.23  | 0.228 |
| 67 | IPI00025426 | 1 | 21.4 | 1.02 | 0.04 | 32 | 27 | PZP Isoform 1 of Pregnancy zone protein precursor | n[145]HQDGSYSTFGER                  | 2 | 764.3509  | 2.988 | 0.194 |
| 67 | IPI00025426 | 1 | 21.4 | 1.02 | 0.04 | 32 | 27 | PZP Isoform 1 of Pregnancy zone protein precursor | GVPIPNK                             | 2 | 502.8162  | 2.324 | 0.225 |
| 67 | IPI00025426 | 1 | 21.4 | 1.02 | 0.04 | 32 | 27 | PZP Isoform 1 of Pregnancy zone protein precursor | n[145]AFQPFVVELTM[147]PYSVIR        | 2 | 1103.0804 | 4.222 | 0.318 |
| 67 | IPI00025426 | 1 | 21.4 | 1.02 | 0.04 | 32 | 27 | PZP Isoform 1 of Pregnancy zone protein precursor | n[145]GVPIPNK[272]                  | 2 | 506.8233  | 2.066 | 0.197 |
| 67 | IPI00025426 | 1 | 21.4 | 1.02 | 0.04 | 32 | 27 | PZP Isoform 1 of Pregnancy zone protein precursor | VSGFIPLKPTVK                        | 3 | 569.3625  | 2.601 | 0.35  |
| 67 | IPI00025426 | 1 | 21.4 | 1.02 | 0.04 | 32 | 27 | PZP Isoform 1 of Pregnancy zone protein precursor | VDSHFR                              | 1 | 900.4687  | 1.824 | 0.075 |
| 67 | IPI00025426 | 1 | 21.4 | 1.02 | 0.04 | 32 | 27 | PZP Isoform 1 of Pregnancy zone protein precursor | n[145]VDSHFR                        | 2 | 452.7415  | 2.06  | 0.125 |
| 67 | IPI00025426 | 1 | 21.4 | 1.02 | 0.04 | 32 | 27 | PZP Isoform 1 of Pregnancy zone protein precursor | n[145]YNILPEK[272]EDSPFALK[272]     | 3 | 732.7474  | 2.727 | 0.309 |
| 67 | IPI00025426 | 1 | 21.4 | 1.02 | 0.04 | 32 | 27 | PZP Isoform 1 of Pregnancy zone protein precursor | VDSHFR                              | 2 | 450.738   | 1.968 | 0.107 |
| 67 | IPI00025426 | 1 | 21.4 | 1.02 | 0.04 | 32 | 27 | PZP Isoform 1 of Pregnancy zone protein precursor | n[145]YNILPEK[272]                  | 2 | 582.847   | 2.486 | 0.138 |
| 67 | IPI00025426 | 1 | 21.4 | 1.02 | 0.04 | 32 | 27 | PZP Isoform 1 of Pregnancy zone protein precursor | n[145]VDSHFR                        | 1 | 904.4758  | 1.669 | 0.064 |
| 67 | IPI00025426 | 1 | 21.4 | 1.02 | 0.04 | 32 | 27 | PZP Isoform 1 of Pregnancy zone protein precursor | n[145]FVELTM[147]PYSVIR             | 2 | 807.9377  | 3.594 | 0.266 |
| 67 | IPI00025426 | 1 | 21.4 | 1.02 | 0.04 | 32 | 27 | PZP Isoform 1 of Pregnancy zone protein precursor | n[145]NQGNTWLTAFLK                  | 2 | 888.4999  | 3.914 | 0.225 |
| 67 | IPI00025426 | 1 | 21.4 | 1.02 | 0.04 | 32 | 27 | PZP Isoform 1 of Pregnancy zone protein precursor | n[145]EGTHGSHVYTK[272]              | 3 | 501.9313  | 1.986 | 0.154 |
| 67 | IPI00025426 | 1 | 21.4 | 1.02 | 0.04 | 32 | 27 | PZP Isoform 1 of Pregnancy zone protein precursor | QLNYK                               | 2 | 473.2795  | 1.725 | 0.097 |
| 67 | IPI00025426 | 1 | 21.4 | 1.02 | 0.04 | 32 | 27 | PZP Isoform 1 of Pregnancy zone protein precursor | DLKPAIVK                            | 3 | 435.2869  | 2.515 | 0.232 |
| 67 | IPI00025426 | 1 | 21.4 | 1.02 | 0.04 | 32 | 27 | PZP Isoform 1 of Pregnancy zone protein precursor | n[145]FVELTMPYSVIR                  | 2 | 799.9403  | 3.516 | 0.329 |
| 67 | IPI00025426 | 1 | 21.4 | 1.02 | 0.04 | 32 | 27 | PZP Isoform 1 of Pregnancy zone protein precursor | n[145]VSGFIPLK[272]PTVK[272]        | 2 | 859.5507  | 2.916 | 0.469 |
| 67 | IPI00025426 | 1 | 21.4 | 1.02 | 0.04 | 32 | 27 | PZP Isoform 1 of Pregnancy zone protein precursor | M[147]VSGFIPLKPTVK                  | 4 | 464.0325  | 1.742 | 0.022 |
| 67 | IPI00025426 | 1 | 21.4 | 1.02 | 0.04 | 32 | 27 | PZP Isoform 1 of Pregnancy zone protein precursor | HQDGSYSTFGER                        | 2 | 762.3473  | 2.011 | 0.005 |
| 67 | IPI00025426 | 1 | 21.4 | 1.02 | 0.04 | 32 | 27 | PZP Isoform 1 of Pregnancy zone protein precursor | FVELTM[147]PYSVIR                   | 2 | 805.9342  | 2.746 | 0.284 |
| 67 | IPI00025426 | 1 | 21.4 | 1.02 | 0.04 | 32 | 27 | PZP Isoform 1 of Pregnancy zone protein precursor | FVELTMPYSVIR                        | 2 | 797.9367  | 3.457 | 0.208 |
| 67 | IPI00025426 | 1 | 21.4 | 1.02 | 0.04 | 32 | 27 | PZP Isoform 1 of Pregnancy zone protein precursor | n[145]QLNYK[272]                    | 2 | 477.2866  | 1.602 | 0.005 |
| 67 | IPI00025426 | 1 | 21.4 | 1.02 | 0.04 | 32 | 27 | PZP Isoform 1 of Pregnancy zone protein precursor | n[145]AGLGISSTASLR                  | 2 | 638.8707  | 2.778 | 0.268 |
| 67 | IPI00025426 | 1 | 21.4 | 1.02 | 0.04 | 32 | 27 | PZP Isoform 1 of Pregnancy zone protein precursor | DLKPAIVK                            | 2 | 652.4267  | 2.425 | 0.2   |
| 67 | IPI00025426 | 1 | 21.4 | 1.02 | 0.04 | 32 | 27 | PZP Isoform 1 of Pregnancy zone protein precursor | FIPLKPTVK                           | 2 | 731.9791  | 1.951 | 0.3   |
| 67 | IPI00025426 | 1 | 21.4 | 1.02 | 0.04 | 32 | 27 | PZP Isoform 1 of Pregnancy zone protein precursor | n[145]LK[272]PAIVK[272]             | 2 | 600.9239  | 2.228 | 0.263 |
| 67 | IPI00025426 | 1 | 21.4 | 1.02 | 0.04 | 32 | 27 | PZP Isoform 1 of Pregnancy zone protein precursor | YNILPEKEDSPFALK                     | 3 | 728.7403  | 2.48  | 0.081 |
| 67 | IPI00025426 | 1 | 21.4 | 1.02 | 0.04 | 32 | 27 | PZP Isoform 1 of Pregnancy zone protein precursor | ALLAYAF                             | 2 | 454.7657  | 1.983 | 0.287 |
| 67 | IPI00025426 | 1 | 21.4 | 1.02 | 0.04 | 32 | 27 | PZP Isoform 1 of Pregnancy zone protein precursor | n[145]VSGFIPLK[272]PTVK[272]        | 3 | 573.3696  | 2.821 | 0.167 |
| 67 | IPI00025426 | 1 | 21.4 | 1.02 | 0.04 | 32 | 27 | PZP Isoform 1 of Pregnancy zone protein precursor | n[145]NQGNTWLTAFLK                  | 3 | 592.669   | 2.126 | 0.115 |

|    |             |   |      |      |      |    |    |                                                             |                                 |   |          |       |       |
|----|-------------|---|------|------|------|----|----|-------------------------------------------------------------|---------------------------------|---|----------|-------|-------|
| 67 | IPI00025426 | 1 | 21.4 | 1.02 | 0.04 | 32 | 27 | PZP Isoform 1 of Pregnancy zone protein precursor           | DLFHCVSF                        | 2 | 577.2621 | 1.853 | 0.36  |
| 67 | IPI00025426 | 1 | 21.4 | 1.02 | 0.04 | 32 | 27 | PZP Isoform 1 of Pregnancy zone protein precursor           | n[145]DLK[272]PAIVK[272]        | 2 | 658.4374 | 2.086 | 0.106 |
| 67 | IPI00025426 | 1 | 21.4 | 1.02 | 0.04 | 32 | 27 | PZP Isoform 1 of Pregnancy zone protein precursor           | M[147]VSGFIPLK                  | 2 | 644.3783 | 2.288 | 0.258 |
| 67 | IPI00025426 | 1 | 21.4 | 1.02 | 0.04 | 32 | 27 | PZP Isoform 1 of Pregnancy zone protein precursor           | n[145]TM[147]PYSVIR             | 2 | 563.806  | 2.066 | 0.244 |
| 67 | IPI00025426 | 1 | 21.4 | 1.02 | 0.04 | 32 | 27 | PZP Isoform 1 of Pregnancy zone protein precursor           | n[145]GFIPLK[272]PTVK[272]      | 3 | 511.3361 | 1.821 | 0.239 |
| 67 | IPI00025426 | 1 | 21.4 | 1.02 | 0.04 | 32 | 27 | PZP Isoform 1 of Pregnancy zone protein precursor           | IPLKPTVK                        | 2 | 658.4449 | 1.879 | 0.24  |
| 67 | IPI00025426 | 1 | 21.4 | 1.02 | 0.04 | 32 | 27 | PZP Isoform 1 of Pregnancy zone protein precursor           | FIPLKPTVK                       | 3 | 488.3218 | 1.843 | 0.206 |
| 67 | IPI00025426 | 1 | 21.4 | 1.02 | 0.04 | 32 | 27 | PZP Isoform 1 of Pregnancy zone protein precursor           | LKPAIVK                         | 3 | 396.9446 | 2.98  | 0.033 |
| 67 | IPI00025426 | 1 | 21.4 | 1.02 | 0.04 | 32 | 27 | PZP Isoform 1 of Pregnancy zone protein precursor           | n[145]TMPYSVIR                  | 2 | 555.8085 | 2.107 | 0.14  |
| 67 | IPI00025426 | 1 | 21.4 | 1.02 | 0.04 | 32 | 27 | PZP Isoform 1 of Pregnancy zone protein precursor           | n[145]FIPLK[272]PTVK[272]       | 2 | 737.9898 | 2.539 | 0.209 |
| 67 | IPI00025426 | 1 | 21.4 | 1.02 | 0.04 | 32 | 27 | PZP Isoform 1 of Pregnancy zone protein precursor           | n[145]IPLK[272]PTVK[272]        | 2 | 664.4555 | 1.94  | 0.175 |
| 67 | IPI00025426 | 1 | 21.4 | 1.02 | 0.04 | 32 | 27 | PZP Isoform 1 of Pregnancy zone protein precursor           | LKPAIVK                         | 2 | 594.9132 | 1.839 | 0.153 |
| 67 | IPI00025426 | 1 | 21.4 | 1.02 | 0.04 | 32 | 27 | PZP Isoform 1 of Pregnancy zone protein precursor           | RKDTVIK                         | 2 | 640.4141 | 1.645 | 0.035 |
| 67 | IPI00025426 | 1 | 21.4 | 1.02 | 0.04 | 32 | 27 | PZP Isoform 1 of Pregnancy zone protein precursor           | SDVAPIAR                        | 2 | 484.7798 | 2.266 | 0.022 |
| 67 | IPI00025426 | 1 | 21.4 | 1.02 | 0.04 | 32 | 27 | PZP Isoform 1 of Pregnancy zone protein precursor           | n[145]AFQPFVEL                  | 2 | 621.338  | 2.101 | 0.048 |
| 67 | IPI00025426 | 1 | 21.4 | 1.02 | 0.04 | 32 | 27 | PZP Isoform 1 of Pregnancy zone protein precursor           | n[145]NQGNTWLTAF                | 2 | 648.3287 | 2.02  | 0.284 |
| 67 | IPI00025426 | 1 | 21.4 | 1.02 | 0.04 | 32 | 27 | PZP Isoform 1 of Pregnancy zone protein precursor           | FVELTMPYSVIR                    | 3 | 532.2936 | 2.128 | 0.093 |
| 67 | IPI00025426 | 1 | 21.4 | 1.02 | 0.04 | 32 | 27 | PZP Isoform 1 of Pregnancy zone protein precursor           | n[145]ALLAYAF                   | 2 | 456.7692 | 1.824 | 0.061 |
| 67 | IPI00025426 | 1 | 21.4 | 1.02 | 0.04 | 32 | 27 | PZP Isoform 1 of Pregnancy zone protein precursor           | ALLAYAF                         | 1 | 908.5241 | 1.559 | 0.282 |
| 67 | IPI00025426 | 1 | 21.4 | 1.02 | 0.04 | 32 | 27 | PZP Isoform 1 of Pregnancy zone protein precursor           | n[145]AFQPF                     | 1 | 753.4052 | 1.648 | 0.137 |
| 67 | IPI00025426 | 1 | 21.4 | 1.02 | 0.04 | 32 | 27 | PZP Isoform 1 of Pregnancy zone protein precursor           | n[145]DLK[272]PAIVK[272]        | 3 | 439.294  | 2.155 | 0.009 |
| 67 | IPI00025426 | 1 | 21.4 | 1.02 | 0.04 | 32 | 27 | PZP Isoform 1 of Pregnancy zone protein precursor           | AFQPF                           | 1 | 749.3981 | 1.518 | 0.155 |
| 67 | IPI00025426 | 1 | 21.4 | 1.02 | 0.04 | 32 | 27 | PZP Isoform 1 of Pregnancy zone protein precursor           | n[145]ALLAYAF                   | 1 | 912.5312 | 1.571 | 0.199 |
| 67 | IPI00025426 | 1 | 21.4 | 1.02 | 0.04 | 32 | 27 | PZP Isoform 1 of Pregnancy zone protein precursor           | n[145]FIPLK[272]PTVK[272]       | 3 | 492.3289 | 2.151 | 0.005 |
| 67 | IPI00025426 | 1 | 21.4 | 1.02 | 0.04 | 32 | 27 | PZP Isoform 1 of Pregnancy zone protein precursor           | FCLESAWNVAK[272]                | 3 | 533.2711 | 2.194 | 0.063 |
| 67 | IPI00025426 | 1 | 21.4 | 1.02 | 0.04 | 32 | 27 | PZP Isoform 1 of Pregnancy zone protein precursor           | EM[147]K                        | 1 | 703.3808 | 1.121 | 0.072 |
| 68 | IPI00025862 | 1 | 40.6 | 0.65 | 0.14 | 16 | 11 | C4BPB Isoform 1 of C4b-binding protein beta chain precursor | n[145]SQCLEHTWAPFPICK[272]      | 3 | 784.7011 | 3.402 | 0.391 |
| 68 | IPI00025862 | 1 | 40.6 | 0.65 | 0.14 | 16 | 11 | C4BPB Isoform 1 of C4b-binding protein beta chain precursor | GYHLVGKK                        | 3 | 441.275  | 3.332 | 0.239 |
| 68 | IPI00025862 | 1 | 40.6 | 0.65 | 0.14 | 16 | 11 | C4BPB Isoform 1 of C4b-binding protein beta chain precursor | n[145]ALLAFQESK[272]            | 2 | 647.8841 | 3.514 | 0.394 |
| 68 | IPI00025862 | 1 | 40.6 | 0.65 | 0.14 | 16 | 11 | C4BPB Isoform 1 of C4b-binding protein beta chain precursor | LIQEAPKPECEK                    | 3 | 617.6671 | 3.296 | 0.242 |
| 68 | IPI00025862 | 1 | 40.6 | 0.65 | 0.14 | 16 | 11 | C4BPB Isoform 1 of C4b-binding protein beta chain precursor | ALLAFQESK                       | 2 | 643.877  | 3.289 | 0.292 |
| 68 | IPI00025862 | 1 | 40.6 | 0.65 | 0.14 | 16 | 11 | C4BPB Isoform 1 of C4b-binding protein beta chain precursor | n[145]ESGM[147]TM[147]EELK[272] | 2 | 737.854  | 2.628 | 0.222 |
| 68 | IPI00025862 | 1 | 40.6 | 0.65 | 0.14 | 16 | 11 | C4BPB Isoform 1 of C4b-binding protein beta chain precursor | SQCLEHTWAPFPICK                 | 3 | 782.0297 | 3.017 | 0.275 |
| 68 | IPI00025862 | 1 | 40.6 | 0.65 | 0.14 | 16 | 11 | C4BPB Isoform 1 of C4b-binding protein beta chain precursor | YSLELK                          | 2 | 516.8081 | 1.931 | 0.059 |
| 68 | IPI00025862 | 1 | 40.6 | 0.65 | 0.14 | 16 | 11 | C4BPB Isoform 1 of C4b-binding protein beta chain precursor | n[145]YSLELK[272]               | 2 | 520.8152 | 1.497 | 0.033 |
| 68 | IPI00025862 | 1 | 40.6 | 0.65 | 0.14 | 16 | 11 | C4BPB Isoform 1 of C4b-binding protein beta chain precursor | n[145]EVEGQILGTYVCIK[272]       | 2 | 943.5039 | 2.247 | 0.036 |
| 68 | IPI00025862 | 1 | 40.6 | 0.65 | 0.14 | 16 | 11 | C4BPB Isoform 1 of C4b-binding protein beta chain precursor | n[145]EHCPPELPPVDNSIFVAK[272]   | 3 | 743.7144 | 3.012 | 0.12  |
| 68 | IPI00025862 | 1 | 40.6 | 0.65 | 0.14 | 16 | 11 | C4BPB Isoform 1 of C4b-binding protein beta chain precursor | M[147]CNDHYILK                  | 3 | 493.57   | 2.031 | 0.092 |
| 68 | IPI00025862 | 1 | 40.6 | 0.65 | 0.14 | 16 | 11 | C4BPB Isoform 1 of C4b-binding protein beta chain precursor | LELK                            | 2 | 391.7604 | 1.578 | 1     |
| 69 | IPI00025864 | 1 | 6.1  | 2.79 | 2.34 | 7  | 6  | BCHE Cholinesterase precursor                               | IFFPGVSEFGK                     | 2 | 754.4191 | 3.579 | 0.424 |
| 69 | IPI00025864 | 1 | 6.1  | 2.79 | 2.34 | 7  | 6  | BCHE Cholinesterase precursor                               | n[145]IFFPGVSEFGK[272]          | 2 | 758.4262 | 3.604 | 0.367 |
| 69 | IPI00025864 | 1 | 6.1  | 2.79 | 2.34 | 7  | 6  | BCHE Cholinesterase precursor                               | n[145]VIVVSM[147]NYR            | 2 | 620.8457 | 2.606 | 0.271 |
| 69 | IPI00025864 | 1 | 6.1  | 2.79 | 2.34 | 7  | 6  | BCHE Cholinesterase precursor                               | n[145]FK[272]K[272]PQSLTK[272]  | 3 | 551.6897 | 1.9   | 0.181 |
| 69 | IPI00025864 | 1 | 6.1  | 2.79 | 2.34 | 7  | 6  | BCHE Cholinesterase precursor                               | FKKPQSLTK                       | 3 | 546.3469 | 2.354 | 0.183 |
| 69 | IPI00025864 | 1 | 6.1  | 2.79 | 2.34 | 7  | 6  | BCHE Cholinesterase precursor                               | n[145]FYYFEHR                   | 3 | 402.5335 | 2.391 | 0.166 |
| 69 | IPI00025864 | 1 | 6.1  | 2.79 | 2.34 | 7  | 6  | BCHE Cholinesterase precursor                               | SK[272]K[272]                   | 2 | 395.7731 | 0.913 | 0.136 |
| 70 | IPI00026199 | 1 | 5.3  | 0.93 | 0.07 | 11 | 4  | GPX3 Glutathione peroxidase 3 precursor                     | FLVGPDPGIPIM[147]R              | 2 | 735.9105 | 3.208 | 0.268 |
| 70 | IPI00026199 | 1 | 5.3  | 0.93 | 0.07 | 11 | 4  | GPX3 Glutathione peroxidase 3 precursor                     | n[145]FLVGPDPGIPIMR             | 2 | 729.9166 | 3.195 | 0.304 |

|    |             |   |      |      |      |    |    |                                         |                                     |   |           |       |       |
|----|-------------|---|------|------|------|----|----|-----------------------------------------|-------------------------------------|---|-----------|-------|-------|
| 70 | IPI00026199 | 1 | 5.3  | 0.93 | 0.07 | 11 | 4  | GPX3 Glutathione peroxidase 3 precursor | n[145]FLVGPDPGIPIM[147]R            | 2 | 737.9141  | 3.486 | 0.204 |
| 70 | IPI00026199 | 1 | 5.3  | 0.93 | 0.07 | 11 | 4  | GPX3 Glutathione peroxidase 3 precursor | FLVGPDPGIPIMR                       | 2 | 727.9131  | 3.351 | 0.079 |
| 71 | IPI00026314 | 1 | 29.9 | 0.91 | 0.08 | 88 | 45 | GSN Isoform 1 of Gelsolin precursor     | AGALNSNDAFVLK                       | 2 | 800.4463  | 4.846 | 0.47  |
| 71 | IPI00026314 | 1 | 29.9 | 0.91 | 0.08 | 88 | 45 | GSN Isoform 1 of Gelsolin precursor     | EVQGFESATFLGYFK                     | 2 | 1002.0173 | 5.108 | 0.473 |
| 71 | IPI00026314 | 1 | 29.9 | 0.91 | 0.08 | 88 | 45 | GSN Isoform 1 of Gelsolin precursor     | n[145]AGALNSNDAFVLK[272]            | 2 | 804.4534  | 5.173 | 0.481 |
| 71 | IPI00026314 | 1 | 29.9 | 0.91 | 0.08 | 88 | 45 | GSN Isoform 1 of Gelsolin precursor     | n[145]EPAHLM[147]SLFGGK[272]        | 2 | 795.9313  | 4.063 | 0.497 |
| 71 | IPI00026314 | 1 | 29.9 | 0.91 | 0.08 | 88 | 45 | GSN Isoform 1 of Gelsolin precursor     | n[145]EVQGFESATFLGYFK[272]          | 2 | 1006.0244 | 5.073 | 0.498 |
| 71 | IPI00026314 | 1 | 29.9 | 0.91 | 0.08 | 88 | 45 | GSN Isoform 1 of Gelsolin precursor     | EPAHMLSLFGGK                        | 3 | 522.9536  | 3.805 | 0.443 |
| 71 | IPI00026314 | 1 | 29.9 | 0.91 | 0.08 | 88 | 45 | GSN Isoform 1 of Gelsolin precursor     | EPAHLM[147]SLFGGK                   | 3 | 528.2852  | 3.505 | 0.403 |
| 71 | IPI00026314 | 1 | 29.9 | 0.91 | 0.08 | 88 | 45 | GSN Isoform 1 of Gelsolin precursor     | KGGVASGFK                           | 3 | 424.2592  | 1.97  | 0.296 |
| 71 | IPI00026314 | 1 | 29.9 | 0.91 | 0.08 | 88 | 45 | GSN Isoform 1 of Gelsolin precursor     | SEDCFIELDHGK                        | 3 | 530.5865  | 3.849 | 0.492 |
| 71 | IPI00026314 | 1 | 29.9 | 0.91 | 0.08 | 88 | 45 | GSN Isoform 1 of Gelsolin precursor     | n[145]EPAHLM[147]SLFGGK[272]        | 3 | 530.9566  | 3.807 | 0.518 |
| 71 | IPI00026314 | 1 | 29.9 | 0.91 | 0.08 | 88 | 45 | GSN Isoform 1 of Gelsolin precursor     | n[145]SEDCFIELDHGK[272]             | 3 | 533.2579  | 2.111 | 0.205 |
| 71 | IPI00026314 | 1 | 29.9 | 0.91 | 0.08 | 88 | 45 | GSN Isoform 1 of Gelsolin precursor     | DSQEEEKTEALTSK                      | 3 | 696.027   | 3.513 | 0.226 |
| 71 | IPI00026314 | 1 | 29.9 | 0.91 | 0.08 | 88 | 45 | GSN Isoform 1 of Gelsolin precursor     | n[145]DSQEEEK[272]TEALTSK[272]      | 3 | 700.0341  | 3.967 | 0.262 |
| 71 | IPI00026314 | 1 | 29.9 | 0.91 | 0.08 | 88 | 45 | GSN Isoform 1 of Gelsolin precursor     | HVVPNEVVVQR                         | 2 | 708.4095  | 3.159 | 0.45  |
| 71 | IPI00026314 | 1 | 29.9 | 0.91 | 0.08 | 88 | 45 | GSN Isoform 1 of Gelsolin precursor     | n[145]EPAHLM[147]SLFGGK[272]PM[147] | 3 | 612.3193  | 3.996 | 0.386 |
| 71 | IPI00026314 | 1 | 29.9 | 0.91 | 0.08 | 88 | 45 | GSN Isoform 1 of Gelsolin precursor     | KGGVASGFK                           | 2 | 635.8852  | 1.24  | 0.003 |
| 71 | IPI00026314 | 1 | 29.9 | 0.91 | 0.08 | 88 | 45 | GSN Isoform 1 of Gelsolin precursor     | n[145]TASDFITK[272]                 | 2 | 585.8341  | 2.781 | 0.341 |
| 71 | IPI00026314 | 1 | 29.9 | 0.91 | 0.08 | 88 | 45 | GSN Isoform 1 of Gelsolin precursor     | TASDFITK                            | 2 | 581.827   | 2.502 | 0.229 |
| 71 | IPI00026314 | 1 | 29.9 | 0.91 | 0.08 | 88 | 45 | GSN Isoform 1 of Gelsolin precursor     | EPAHLM[147]SLFGGKPM[147]            | 3 | 609.6479  | 3.553 | 0.391 |
| 71 | IPI00026314 | 1 | 29.9 | 0.91 | 0.08 | 88 | 45 | GSN Isoform 1 of Gelsolin precursor     | AVEVLPK                             | 2 | 518.3317  | 2.711 | 0.212 |
| 71 | IPI00026314 | 1 | 29.9 | 0.91 | 0.08 | 88 | 45 | GSN Isoform 1 of Gelsolin precursor     | n[145]EPAHLM[147]SLFGGK[272]PM      | 3 | 606.9877  | 3.488 | 0.35  |
| 71 | IPI00026314 | 1 | 29.9 | 0.91 | 0.08 | 88 | 45 | GSN Isoform 1 of Gelsolin precursor     | n[145]TGAQELLR                      | 2 | 516.3019  | 3.149 | 0.145 |
| 71 | IPI00026314 | 1 | 29.9 | 0.91 | 0.08 | 88 | 45 | GSN Isoform 1 of Gelsolin precursor     | n[145]HVVPNEVVVQR                   | 2 | 710.4131  | 1.985 | 0.351 |
| 71 | IPI00026314 | 1 | 29.9 | 0.91 | 0.08 | 88 | 45 | GSN Isoform 1 of Gelsolin precursor     | YIETDPANR                           | 2 | 609.8093  | 1.7   | 0.251 |
| 71 | IPI00026314 | 1 | 29.9 | 0.91 | 0.08 | 88 | 45 | GSN Isoform 1 of Gelsolin precursor     | n[145]EPAHMLSLFGGK[272]             | 3 | 525.625   | 3.039 | 0.34  |
| 71 | IPI00026314 | 1 | 29.9 | 0.91 | 0.08 | 88 | 45 | GSN Isoform 1 of Gelsolin precursor     | n[145]AVEVLPK[272]                  | 2 | 522.3388  | 1.54  | 0.03  |
| 71 | IPI00026314 | 1 | 29.9 | 0.91 | 0.08 | 88 | 45 | GSN Isoform 1 of Gelsolin precursor     | n[145]SEDCFIELDHGK[272]             | 2 | 799.3833  | 2.976 | 0.299 |
| 71 | IPI00026314 | 1 | 29.9 | 0.91 | 0.08 | 88 | 45 | GSN Isoform 1 of Gelsolin precursor     | EVQGFESATFLGYFK                     | 3 | 668.3473  | 3.25  | 0.246 |
| 71 | IPI00026314 | 1 | 29.9 | 0.91 | 0.08 | 88 | 45 | GSN Isoform 1 of Gelsolin precursor     | AQPVQVAEGSEPDGFWEALGGK              | 3 | 851.4309  | 3.428 | 0.129 |
| 71 | IPI00026314 | 1 | 29.9 | 0.91 | 0.08 | 88 | 45 | GSN Isoform 1 of Gelsolin precursor     | VHVSEEGTEPEAM[147]LQVLGPK           | 3 | 816.0931  | 3.687 | 0.318 |
| 71 | IPI00026314 | 1 | 29.9 | 0.91 | 0.08 | 88 | 45 | GSN Isoform 1 of Gelsolin precursor     | TGAQELLR                            | 2 | 514.2984  | 2.657 | 0.031 |
| 71 | IPI00026314 | 1 | 29.9 | 0.91 | 0.08 | 88 | 45 | GSN Isoform 1 of Gelsolin precursor     | n[145]AMAELAA                       | 1 | 820.4356  | 1.383 | 0.222 |
| 71 | IPI00026314 | 1 | 29.9 | 0.91 | 0.08 | 88 | 45 | GSN Isoform 1 of Gelsolin precursor     | LFACSNK                             | 2 | 554.7858  | 2.193 | 0.018 |
| 71 | IPI00026314 | 1 | 29.9 | 0.91 | 0.08 | 88 | 45 | GSN Isoform 1 of Gelsolin precursor     | EPAHLM[147]SLFGGK                   | 2 | 791.9242  | 3.639 | 0.401 |
| 71 | IPI00026314 | 1 | 29.9 | 0.91 | 0.08 | 88 | 45 | GSN Isoform 1 of Gelsolin precursor     | n[145]YIETDPANR                     | 2 | 611.8129  | 1.367 | 0.231 |
| 71 | IPI00026314 | 1 | 29.9 | 0.91 | 0.08 | 88 | 45 | GSN Isoform 1 of Gelsolin precursor     | LFQVK                               | 2 | 457.7948  | 1.766 | 0.025 |
| 71 | IPI00026314 | 1 | 29.9 | 0.91 | 0.08 | 88 | 45 | GSN Isoform 1 of Gelsolin precursor     | n[145]SM[147]VVEHPEFLK[272]         | 3 | 540.6284  | 2.472 | 0.256 |
| 71 | IPI00026314 | 1 | 29.9 | 0.91 | 0.08 | 88 | 45 | GSN Isoform 1 of Gelsolin precursor     | n[145]EPAHMLSLFGGK[272]PM[147]      | 3 | 606.9877  | 2.254 | 0.156 |
| 71 | IPI00026314 | 1 | 29.9 | 0.91 | 0.08 | 88 | 45 | GSN Isoform 1 of Gelsolin precursor     | n[145]PALPAGTEDTAK[272]             | 2 | 729.9058  | 3.326 | 0.317 |
| 71 | IPI00026314 | 1 | 29.9 | 0.91 | 0.08 | 88 | 45 | GSN Isoform 1 of Gelsolin precursor     | n[145]PNSM[147]VVEHPEFLK[272]       | 3 | 610.9936  | 2.625 | 0.242 |
| 71 | IPI00026314 | 1 | 29.9 | 0.91 | 0.08 | 88 | 45 | GSN Isoform 1 of Gelsolin precursor     | VPFDAATLHTSTAMAAQHGM[147]DDDGTGQK   | 4 | 793.1224  | 3.66  | 0.266 |
| 71 | IPI00026314 | 1 | 29.9 | 0.91 | 0.08 | 88 | 45 | GSN Isoform 1 of Gelsolin precursor     | n[145]PNSMVVEHPEFLK[272]            | 3 | 605.662   | 2.821 | 0.17  |
| 71 | IPI00026314 | 1 | 29.9 | 0.91 | 0.08 | 88 | 45 | GSN Isoform 1 of Gelsolin precursor     | PALPAGTEDTAK                        | 2 | 725.8987  | 2.493 | 0.196 |
| 71 | IPI00026314 | 1 | 29.9 | 0.91 | 0.08 | 88 | 45 | GSN Isoform 1 of Gelsolin precursor     | EPAHMLSLFGGKPM[147]                 | 3 | 604.3163  | 3.355 | 0.116 |
| 71 | IPI00026314 | 1 | 29.9 | 0.91 | 0.08 | 88 | 45 | GSN Isoform 1 of Gelsolin precursor     | GGVASGFK                            | 2 | 501.7902  | 1.81  | 0.093 |
| 71 | IPI00026314 | 1 | 29.9 | 0.91 | 0.08 | 88 | 45 | GSN Isoform 1 of Gelsolin precursor     | EPAHLM[147]SLFGGKPM                 | 3 | 604.3163  | 2.476 | 0.058 |



|    |             |   |      |      |      |    |    |                                                                       |                                      |   |          |       |       |
|----|-------------|---|------|------|------|----|----|-----------------------------------------------------------------------|--------------------------------------|---|----------|-------|-------|
| 71 | IPI00026314 | 1 | 29.9 | 0.91 | 0.08 | 88 | 45 | GSN Isoform 1 of Gelsolin precursor                                   | SMVVEHPEFLK                          | 3 | 532.6253 | 2.562 | 0.012 |
| 71 | IPI00026314 | 1 | 29.9 | 0.91 | 0.08 | 88 | 45 | GSN Isoform 1 of Gelsolin precursor                                   | n[145]VHVSEEGTEPEAM[147]LQVLGPK[272] | 3 | 818.7645 | 2.157 | 0.137 |
| 72 | IPI00026625 | 1 | 0.5  | 1.05 | 0.14 | 19 | 4  | NUP155 Isoform 1 of Nuclear pore complex protein Nup155               | LHELEEK                              | 2 | 589.3324 | 2.338 | 0.133 |
| 72 | IPI00026625 | 1 | 0.5  | 1.05 | 0.14 | 19 | 4  | NUP155 Isoform 1 of Nuclear pore complex protein Nup155               | n[145]LHELEEK[272]                   | 2 | 593.3395 | 1.707 | 0.024 |
| 72 | IPI00026625 | 1 | 0.5  | 1.05 | 0.14 | 19 | 4  | NUP155 Isoform 1 of Nuclear pore complex protein Nup155               | LHELEEK                              | 3 | 393.224  | 2.958 | 0.079 |
| 72 | IPI00026625 | 1 | 0.5  | 1.05 | 0.14 | 19 | 4  | NUP155 Isoform 1 of Nuclear pore complex protein Nup155               | n[145]LHELEEK[272]                   | 3 | 395.8954 | 2.267 | 0.158 |
| 73 | IPI00027235 | 1 | 5.9  | 1.1  | 0.54 | 10 | 9  | ATRN Isoform 1 of Attractin precursor                                 | n[145]AAAAAVSGSAAAEAK[272]           | 2 | 802.946  | 5.029 | 0.554 |
| 73 | IPI00027235 | 1 | 5.9  | 1.1  | 0.54 | 10 | 9  | ATRN Isoform 1 of Attractin precursor                                 | n[145]SEAACLAAAGPGIR                 | 2 | 703.3561 | 4.408 | 0.45  |
| 73 | IPI00027235 | 1 | 5.9  | 1.1  | 0.54 | 10 | 9  | ATRN Isoform 1 of Attractin precursor                                 | n[145]SVNNVVVR                       | 2 | 515.8099 | 3.067 | 0.166 |
| 73 | IPI00027235 | 1 | 5.9  | 1.1  | 0.54 | 10 | 9  | ATRN Isoform 1 of Attractin precursor                                 | EEYSNLK                              | 2 | 581.8088 | 2.617 | 0.227 |
| 73 | IPI00027235 | 1 | 5.9  | 1.1  | 0.54 | 10 | 9  | ATRN Isoform 1 of Attractin precursor                                 | n[145]LADDLYR                        | 2 | 505.2754 | 2.765 | 0.117 |
| 73 | IPI00027235 | 1 | 5.9  | 1.1  | 0.54 | 10 | 9  | ATRN Isoform 1 of Attractin precursor                                 | n[145]AK[272]EQYAVVGH                | 3 | 463.9292 | 3.015 | 0.395 |
| 73 | IPI00027235 | 1 | 5.9  | 1.1  | 0.54 | 10 | 9  | ATRN Isoform 1 of Attractin precursor                                 | n[145]EEYSNLK[272]                   | 2 | 585.8159 | 2.203 | 0.107 |
| 73 | IPI00027235 | 1 | 5.9  | 1.1  | 0.54 | 10 | 9  | ATRN Isoform 1 of Attractin precursor                                 | n[145]IYM[147]YG GK[272]             | 2 | 568.3067 | 1.928 | 0.123 |
| 73 | IPI00027235 | 1 | 5.9  | 1.1  | 0.54 | 10 | 9  | ATRN Isoform 1 of Attractin precursor                                 | n[145]YQGNPLR                        | 2 | 496.2757 | 2.08  | 0.044 |
| 74 | IPI00027350 | 1 | 17.7 | 0.69 | 0.06 | 5  | 4  | PRDX2 Peroxiredoxin-2                                                 | IGKPAPDFK                            | 3 | 464.9503 | 2.537 | 0.391 |
| 74 | IPI00027350 | 1 | 17.7 | 0.69 | 0.06 | 5  | 4  | PRDX2 Peroxiredoxin-2                                                 | n[145]IGK[272]PAPDFK[272]            | 3 | 468.9574 | 2.617 | 0.293 |
| 74 | IPI00027350 | 1 | 17.7 | 0.69 | 0.06 | 5  | 4  | PRDX2 Peroxiredoxin-2                                                 | KEGGLGPLNIPLLADVTR                   | 3 | 715.0914 | 2.393 | 0.073 |
| 74 | IPI00027350 | 1 | 17.7 | 0.69 | 0.06 | 5  | 4  | PRDX2 Peroxiredoxin-2                                                 | GLFIIDGK                             | 2 | 571.8503 | 1.601 | 0.042 |
| 74 | IPI00027350 | 1 | 17.7 | 0.69 | 0.06 | 5  | 4  | PRDX2 Peroxiredoxin-2                                                 | n[145]GLFIIDGK[272]                  | 2 | 575.8574 | 1.524 | 0.048 |
| 75 | IPI00027462 | 1 | 13.2 | 1.57 | 0    | 2  | 2  | S100A9 Protein S100-A9                                                | NIETIINTFHQYSVK                      | 3 | 696.381  | 4.608 | 0.53  |
| 75 | IPI00027462 | 1 | 13.2 | 1.57 | 0    | 2  | 2  | S100A9 Protein S100-A9                                                | n[145]NIETIINTFHQYSVK[272]           | 3 | 699.0524 | 4.16  | 0.481 |
| 75 | IPI00027462 | 1 | 13.2 | 1.57 | 0    | 2  | 2  | S100A9 Protein S100-A9                                                | SVK[272]                             | 1 | 617.4104 | 0.88  | 0.378 |
| 76 | IPI00027482 | 1 | 15.6 | 0.78 | 0.02 | 14 | 10 | SERPINA6 Corticosteroid-binding globulin precursor                    | VLVNYIFFK                            | 2 | 711.9291 | 3.836 | 0.382 |
| 76 | IPI00027482 | 1 | 15.6 | 0.78 | 0.02 | 14 | 10 | SERPINA6 Corticosteroid-binding globulin precursor                    | n[145]EENFYVDETTVVVK[272]            | 2 | 930.9771 | 4.33  | 0.399 |
| 76 | IPI00027482 | 1 | 15.6 | 0.78 | 0.02 | 14 | 10 | SERPINA6 Corticosteroid-binding globulin precursor                    | SETEIHQGFQHLHQLFAK                   | 3 | 810.7608 | 5.103 | 0.446 |
| 76 | IPI00027482 | 1 | 15.6 | 0.78 | 0.02 | 14 | 10 | SERPINA6 Corticosteroid-binding globulin precursor                    | n[145]SETEIHQGFQHLHQLFAK[272]        | 3 | 813.4322 | 5.445 | 0.402 |
| 76 | IPI00027482 | 1 | 15.6 | 0.78 | 0.02 | 14 | 10 | SERPINA6 Corticosteroid-binding globulin precursor                    | SETEIHQGFQHLHQLFAK                   | 4 | 608.3224 | 3.644 | 0.385 |
| 76 | IPI00027482 | 1 | 15.6 | 0.78 | 0.02 | 14 | 10 | SERPINA6 Corticosteroid-binding globulin precursor                    | n[145]SETEIHQGFQHLHQLFAK[272]        | 4 | 610.326  | 4.728 | 0.444 |
| 76 | IPI00027482 | 1 | 15.6 | 0.78 | 0.02 | 14 | 10 | SERPINA6 Corticosteroid-binding globulin precursor                    | ITQDAQLK                             | 2 | 598.8535 | 1.913 | 0.033 |
| 76 | IPI00027482 | 1 | 15.6 | 0.78 | 0.02 | 14 | 10 | SERPINA6 Corticosteroid-binding globulin precursor                    | n[145]ITQDAQLK[272]                  | 2 | 602.8606 | 2.375 | 0.064 |
| 76 | IPI00027482 | 1 | 15.6 | 0.78 | 0.02 | 14 | 10 | SERPINA6 Corticosteroid-binding globulin precursor                    | M[147]DPNAAVYVNM[147]SNHHR           | 3 | 643.6212 | 2.547 | 0.318 |
| 76 | IPI00027482 | 1 | 15.6 | 0.78 | 0.02 | 14 | 10 | SERPINA6 Corticosteroid-binding globulin precursor                    | n[145]VLVNYIFFK[272]                 | 2 | 715.9362 | 3.813 | 0.333 |
| 77 | IPI00027843 | 1 | 4.8  | 0.84 | 0    | 3  | 3  | PROZ Isoform 1 of Vitamin K-dependent protein Z precursor             | DFAEHLIPR                            | 3 | 450.9225 | 3.097 | 0.225 |
| 77 | IPI00027843 | 1 | 4.8  | 0.84 | 0    | 3  | 3  | PROZ Isoform 1 of Vitamin K-dependent protein Z precursor             | n[145]DFAEHLIPR                      | 3 | 452.2582 | 2.967 | 0.202 |
| 77 | IPI00027843 | 1 | 4.8  | 0.84 | 0    | 3  | 3  | PROZ Isoform 1 of Vitamin K-dependent protein Z precursor             | n[145]DFCGGVIIR                      | 2 | 585.3    | 1.859 | 0.195 |
| 78 | IPI00028413 | 1 | 11.6 | 0.67 | 0.03 | 28 | 19 | ITIH3 Isoform 1 of Inter-alpha-trypsin inhibitor heavy chain H3 precu | n[145]LVDEDM[147]NSFK[272]           | 2 | 751.376  | 3.581 | 0.481 |
| 78 | IPI00028413 | 1 | 11.6 | 0.67 | 0.03 | 28 | 19 | ITIH3 Isoform 1 of Inter-alpha-trypsin inhibitor heavy chain H3 precu | n[145]VTFELTYEELLK[272]R             | 3 | 643.7027 | 3.361 | 0.467 |
| 78 | IPI00028413 | 1 | 11.6 | 0.67 | 0.03 | 28 | 19 | ITIH3 Isoform 1 of Inter-alpha-trypsin inhibitor heavy chain H3 precu | VTFELTYEELLKR                        | 3 | 641.0313 | 3.598 | 0.291 |
| 78 | IPI00028413 | 1 | 11.6 | 0.67 | 0.03 | 28 | 19 | ITIH3 Isoform 1 of Inter-alpha-trypsin inhibitor heavy chain H3 precu | KGHVSFKPSLDQQR                       | 4 | 512.5445 | 3.019 | 0.322 |
| 78 | IPI00028413 | 1 | 11.6 | 0.67 | 0.03 | 28 | 19 | ITIH3 Isoform 1 of Inter-alpha-trypsin inhibitor heavy chain H3 precu | n[145]DFLGFYVVDSDHR                  | 3 | 533.6076 | 2.7   | 0.28  |
| 78 | IPI00028413 | 1 | 11.6 | 0.67 | 0.03 | 28 | 19 | ITIH3 Isoform 1 of Inter-alpha-trypsin inhibitor heavy chain H3 precu | n[145]GMTNINDGLLR                    | 2 | 674.3622 | 3.257 | 0.333 |
| 78 | IPI00028413 | 1 | 11.6 | 0.67 | 0.03 | 28 | 19 | ITIH3 Isoform 1 of Inter-alpha-trypsin inhibitor heavy chain H3 precu | KGHVSFKPSLDQQR                       | 3 | 683.0569 | 2.863 | 0.293 |
| 78 | IPI00028413 | 1 | 11.6 | 0.67 | 0.03 | 28 | 19 | ITIH3 Isoform 1 of Inter-alpha-trypsin inhibitor heavy chain H3 precu | n[145]GM[147]TNINDGLLR               | 2 | 682.3597 | 2.243 | 0.077 |
| 78 | IPI00028413 | 1 | 11.6 | 0.67 | 0.03 | 28 | 19 | ITIH3 Isoform 1 of Inter-alpha-trypsin inhibitor heavy chain H3 precu | n[145]LVDEDMNSFK[272]                | 2 | 743.3785 | 3.097 | 0.378 |
| 78 | IPI00028413 | 1 | 11.6 | 0.67 | 0.03 | 28 | 19 | ITIH3 Isoform 1 of Inter-alpha-trypsin inhibitor heavy chain H3 precu | n[145]GK[272]YEMYLK[272]             | 3 | 488.6146 | 2.905 | 0.185 |
| 78 | IPI00028413 | 1 | 11.6 | 0.67 | 0.03 | 28 | 19 | ITIH3 Isoform 1 of Inter-alpha-trypsin inhibitor heavy chain H3 precu | n[145]EVSFDVELPK[272]                | 2 | 725.9053 | 2.241 | 0.118 |
| 78 | IPI00028413 | 1 | 11.6 | 0.67 | 0.03 | 28 | 19 | ITIH3 Isoform 1 of Inter-alpha-trypsin inhibitor heavy chain H3 precu | n[145]FAHNVVMT[147]R                 | 2 | 617.8278 | 1.85  | 0.022 |

|    |             |   |      |      |      |     |    |                                                                           |                                  |   |           |       |       |
|----|-------------|---|------|------|------|-----|----|---------------------------------------------------------------------------|----------------------------------|---|-----------|-------|-------|
| 78 | IPI00028413 | 1 | 11.6 | 0.67 | 0.03 | 28  | 19 | ITIH3 Isoform 1 of Inter-alpha-trypsin inhibitor heavy chain H3 precursor | LVDEDM[147]NSFK                  | 2 | 747.3689  | 1.899 | 0.204 |
| 78 | IPI00028413 | 1 | 11.6 | 0.67 | 0.03 | 28  | 19 | ITIH3 Isoform 1 of Inter-alpha-trypsin inhibitor heavy chain H3 precursor | ALDISIK                          | 2 | 520.3292  | 1.666 | 0.038 |
| 78 | IPI00028413 | 1 | 11.6 | 0.67 | 0.03 | 28  | 19 | ITIH3 Isoform 1 of Inter-alpha-trypsin inhibitor heavy chain H3 precursor | n[145]DYIFGNYSIER                | 2 | 717.3627  | 1.75  | 0.184 |
| 78 | IPI00028413 | 1 | 11.6 | 0.67 | 0.03 | 28  | 19 | ITIH3 Isoform 1 of Inter-alpha-trypsin inhibitor heavy chain H3 precursor | GKYEM[147]YLK                    | 2 | 734.4051  | 2.308 | 0.144 |
| 78 | IPI00028413 | 1 | 11.6 | 0.67 | 0.03 | 28  | 19 | ITIH3 Isoform 1 of Inter-alpha-trypsin inhibitor heavy chain H3 precursor | n[145]GK[272]YEM[147]YLK[272]    | 2 | 740.4158  | 2.063 | 0.176 |
| 78 | IPI00028413 | 1 | 11.6 | 0.67 | 0.03 | 28  | 19 | ITIH3 Isoform 1 of Inter-alpha-trypsin inhibitor heavy chain H3 precursor | KGHVSFK                          | 3 | 408.2522  | 2.715 | 0.109 |
| 78 | IPI00028413 | 1 | 11.6 | 0.67 | 0.03 | 28  | 19 | ITIH3 Isoform 1 of Inter-alpha-trypsin inhibitor heavy chain H3 precursor | n[145]GK[272]YEM[147]YLK[272]    | 3 | 493.9463  | 1.322 | 0.096 |
| 78 | IPI00028413 | 1 | 11.6 | 0.67 | 0.03 | 28  | 19 | ITIH3 Isoform 1 of Inter-alpha-trypsin inhibitor heavy chain H3 precursor | GKYEM[147]YLK                    | 3 | 489.9392  | 1.246 | 0.034 |
| 78 | IPI00028413 | 1 | 11.6 | 0.67 | 0.03 | 28  | 19 | ITIH3 Isoform 1 of Inter-alpha-trypsin inhibitor heavy chain H3 precursor | KSFSGK                           | 2 | 537.327   | 1.865 | 0.132 |
| 79 | IPI00029061 | 1 | 10   | 0.75 | 0.04 | 9   | 9  | SEPP1 Selenoprotein P precursor                                           | n[145]VSLATVDK[272]              | 2 | 560.8445  | 2.338 | 0.232 |
| 79 | IPI00029061 | 1 | 10   | 0.75 | 0.04 | 9   | 9  | SEPP1 Selenoprotein P precursor                                           | DDFLIYDR                         | 2 | 598.801   | 2.826 | 0.12  |
| 79 | IPI00029061 | 1 | 10   | 0.75 | 0.04 | 9   | 9  | SEPP1 Selenoprotein P precursor                                           | n[145]DDFLIYDR                   | 2 | 600.8045  | 2.289 | 0.136 |
| 79 | IPI00029061 | 1 | 10   | 0.75 | 0.04 | 9   | 9  | SEPP1 Selenoprotein P precursor                                           | VSLATVDK                         | 2 | 556.8374  | 2.236 | 0.072 |
| 79 | IPI00029061 | 1 | 10   | 0.75 | 0.04 | 9   | 9  | SEPP1 Selenoprotein P precursor                                           | HLIFEK                           | 2 | 533.8241  | 1.869 | 0.135 |
| 79 | IPI00029061 | 1 | 10   | 0.75 | 0.04 | 9   | 9  | SEPP1 Selenoprotein P precursor                                           | n[145]HLIFEK[272]                | 2 | 537.8312  | 1.572 | 0.087 |
| 79 | IPI00029061 | 1 | 10   | 0.75 | 0.04 | 9   | 9  | SEPP1 Selenoprotein P precursor                                           | IAYCEK                           | 2 | 526.767   | 1.726 | 0.039 |
| 79 | IPI00029061 | 1 | 10   | 0.75 | 0.04 | 9   | 9  | SEPP1 Selenoprotein P precursor                                           | n[145]ESQDQSSLCK[272]            | 2 | 729.844   | 2.99  | 0.219 |
| 79 | IPI00029061 | 1 | 10   | 0.75 | 0.04 | 9   | 9  | SEPP1 Selenoprotein P precursor                                           | FLIYDR                           | 2 | 483.774   | 2.406 | 0.019 |
| 80 | IPI00029168 | 1 | 7.7  | 0.45 | 0.12 | 4   | 3  | LPA Apolipoprotein                                                        | n[145]EAQLLVIENVCNHYK[272]       | 3 | 746.0497  | 5.711 | 0.54  |
| 80 | IPI00029168 | 1 | 7.7  | 0.45 | 0.12 | 4   | 3  | LPA Apolipoprotein                                                        | n[145]GTYSTTVTGR                 | 2 | 593.8129  | 3.406 | 0.279 |
| 80 | IPI00029168 | 1 | 7.7  | 0.45 | 0.12 | 4   | 3  | LPA Apolipoprotein                                                        | n[145]GSFSTTVTGR                 | 2 | 578.8076  | 3.01  | 0.239 |
| 80 | IPI00029168 | 1 | 7.7  | 0.45 | 0.12 | 4   | 3  | LPA Apolipoprotein                                                        | n[145]DIALK[272]                 | 2 | 480.8203  | 1.803 | 1     |
| 81 | IPI00029193 | 1 | 11   | 0.98 | 0.28 | 7   | 7  | HGFAC Hepatocyte growth factor activator precursor                        | n[145]EALVPLVADHK[272]           | 3 | 493.964   | 3.413 | 0.408 |
| 81 | IPI00029193 | 1 | 11   | 0.98 | 0.28 | 7   | 7  | HGFAC Hepatocyte growth factor activator precursor                        | n[145]LHK[272]PGVYTR             | 3 | 453.6098  | 2.553 | 0.314 |
| 81 | IPI00029193 | 1 | 11   | 0.98 | 0.28 | 7   | 7  | HGFAC Hepatocyte growth factor activator precursor                        | n[145]SQFVQPICLPEPGSTFPAGHK[272] | 3 | 858.7744  | 3.52  | 0.221 |
| 81 | IPI00029193 | 1 | 11   | 0.98 | 0.28 | 7   | 7  | HGFAC Hepatocyte growth factor activator precursor                        | n[145]TLYSVFNPSDHLVLR            | 3 | 711.7202  | 4.508 | 0.324 |
| 81 | IPI00029193 | 1 | 11   | 0.98 | 0.28 | 7   | 7  | HGFAC Hepatocyte growth factor activator precursor                        | n[145]SVFNPSDHLVLR               | 3 | 585.9885  | 2.817 | 0.238 |
| 81 | IPI00029193 | 1 | 11   | 0.98 | 0.28 | 7   | 7  | HGFAC Hepatocyte growth factor activator precursor                        | LHKPGVYTR                        | 3 | 450.9384  | 2.279 | 0.038 |
| 81 | IPI00029193 | 1 | 11   | 0.98 | 0.28 | 7   | 7  | HGFAC Hepatocyte growth factor activator precursor                        | n[145]ACQGDSSGGLACEK             | 2 | 856.3733  | 2.917 | 0.288 |
| 82 | IPI00029260 | 1 | 5.3  | 0.62 | 0.07 | 4   | 4  | CD14 Monocyte differentiation antigen CD14 precursor                      | LKELTLEDLK                       | 3 | 541.3345  | 2.517 | 0.159 |
| 82 | IPI00029260 | 1 | 5.3  | 0.62 | 0.07 | 4   | 4  | CD14 Monocyte differentiation antigen CD14 precursor                      | n[145]LK[272]ELTLEDLK[272]       | 3 | 545.3416  | 2.996 | 0.127 |
| 82 | IPI00029260 | 1 | 5.3  | 0.62 | 0.07 | 4   | 4  | CD14 Monocyte differentiation antigen CD14 precursor                      | n[145]SLDLSHNSLR                 | 3 | 429.2375  | 3.584 | 0.111 |
| 82 | IPI00029260 | 1 | 5.3  | 0.62 | 0.07 | 4   | 4  | CD14 Monocyte differentiation antigen CD14 precursor                      | n[145]SLDLSHNSLR                 | 2 | 643.3527  | 3.035 | 0.071 |
| 83 | IPI00029739 | 1 | 52.1 | 0.7  | 0.16 | 204 | ## | CFH Isoform 1 of Complement factor H precursor                            | CFEGFGIDGPAIAK                   | 2 | 875.9364  | 4.479 | 0.526 |
| 83 | IPI00029739 | 1 | 52.1 | 0.7  | 0.16 | 204 | ## | CFH Isoform 1 of Complement factor H precursor                            | EQVQSCGPPPELLNGNVK               | 2 | 1118.0667 | 5.864 | 0.538 |
| 83 | IPI00029739 | 1 | 52.1 | 0.7  | 0.16 | 204 | ## | CFH Isoform 1 of Complement factor H precursor                            | SIDVACHPGYALPK                   | 2 | 898.963   | 5.021 | 0.501 |
| 83 | IPI00029739 | 1 | 52.1 | 0.7  | 0.16 | 204 | ## | CFH Isoform 1 of Complement factor H precursor                            | SPDIVNGSPISQK                    | 2 | 811.4491  | 4.574 | 0.513 |
| 83 | IPI00029739 | 1 | 52.1 | 0.7  | 0.16 | 204 | ## | CFH Isoform 1 of Complement factor H precursor                            | TLTGGNVFEYGVK                    | 2 | 832.954   | 4.725 | 0.525 |
| 83 | IPI00029739 | 1 | 52.1 | 0.7  | 0.16 | 204 | ## | CFH Isoform 1 of Complement factor H precursor                            | n[145]AGEQVTTYTCATYYK[272]       | 2 | 966.4597  | 5.364 | 0.439 |
| 83 | IPI00029739 | 1 | 52.1 | 0.7  | 0.16 | 204 | ## | CFH Isoform 1 of Complement factor H precursor                            | n[145]CYFPYLENGYNQNYGR           | 2 | 1095.9783 | 4.818 | 0.586 |
| 83 | IPI00029739 | 1 | 52.1 | 0.7  | 0.16 | 204 | ## | CFH Isoform 1 of Complement factor H precursor                            | n[145]DTSCVNPPTVQNAYIVSR         | 2 | 1077.5256 | 5.388 | 0.467 |
| 83 | IPI00029739 | 1 | 52.1 | 0.7  | 0.16 | 204 | ## | CFH Isoform 1 of Complement factor H precursor                            | n[145]EIM[147]ENYNIALR           | 2 | 763.3937  | 3.642 | 0.438 |
| 83 | IPI00029739 | 1 | 52.1 | 0.7  | 0.16 | 204 | ## | CFH Isoform 1 of Complement factor H precursor                            | n[145]HFGLSPDLPICK[272]          | 2 | 830.9433  | 4.081 | 0.506 |
| 83 | IPI00029739 | 1 | 52.1 | 0.7  | 0.16 | 204 | ## | CFH Isoform 1 of Complement factor H precursor                            | n[145]SIDVACHPGYALPK[272]        | 2 | 902.9701  | 5.03  | 0.477 |
| 83 | IPI00029739 | 1 | 52.1 | 0.7  | 0.16 | 204 | ## | CFH Isoform 1 of Complement factor H precursor                            | n[145]SPDIVNGSPISQK[272]         | 2 | 815.4562  | 4.398 | 0.476 |
| 83 | IPI00029739 | 1 | 52.1 | 0.7  | 0.16 | 204 | ## | CFH Isoform 1 of Complement factor H precursor                            | n[145]SSQESYAHGTK[272]           | 2 | 741.875   | 4.427 | 0.49  |
| 83 | IPI00029739 | 1 | 52.1 | 0.7  | 0.16 | 204 | ## | CFH Isoform 1 of Complement factor H precursor                            | n[145]TGESVEFVCK[272]            | 2 | 716.8564  | 4.015 | 0.487 |
| 83 | IPI00029739 | 1 | 52.1 | 0.7  | 0.16 | 204 | ## | CFH Isoform 1 of Complement factor H precursor                            | n[145]WSSPPQCEGLPCK[272]         | 2 | 906.4132  | 3.606 | 0.548 |

|    |             |   |      |     |      |     |    |                                                |                                         |   |           |       |       |
|----|-------------|---|------|-----|------|-----|----|------------------------------------------------|-----------------------------------------|---|-----------|-------|-------|
| 83 | IPI00029739 | 1 | 52.1 | 0.7 | 0.16 | 204 | ## | CFH Isoform 1 of Complement factor H precursor | CTLKPCDYDPIK                            | 3 | 636.6465  | 3.275 | 0.443 |
| 83 | IPI00029739 | 1 | 52.1 | 0.7 | 0.16 | 204 | ## | CFH Isoform 1 of Complement factor H precursor | GDAVCTESGWRPLPSCEEK                     | 3 | 812.6987  | 5.132 | 0.511 |
| 83 | IPI00029739 | 1 | 52.1 | 0.7 | 0.16 | 204 | ## | CFH Isoform 1 of Complement factor H precursor | IEGDEEM[147]HCSDDGFWSK                  | 3 | 776.3186  | 3.737 | 0.464 |
| 83 | IPI00029739 | 1 | 52.1 | 0.7 | 0.16 | 204 | ## | CFH Isoform 1 of Complement factor H precursor | SIDVACHPGYALPK                          | 3 | 599.6444  | 2.462 | 0.159 |
| 83 | IPI00029739 | 1 | 52.1 | 0.7 | 0.16 | 204 | ## | CFH Isoform 1 of Complement factor H precursor | SSNLILLEHLK                             | 3 | 559.3296  | 1.758 | 0.019 |
| 83 | IPI00029739 | 1 | 52.1 | 0.7 | 0.16 | 204 | ## | CFH Isoform 1 of Complement factor H precursor | SSQESYAHGTK                             | 3 | 492.2477  | 4.097 | 0.404 |
| 83 | IPI00029739 | 1 | 52.1 | 0.7 | 0.16 | 204 | ## | CFH Isoform 1 of Complement factor H precursor | TKEEYGHSEVVEYYCNPR                      | 3 | 843.7228  | 4.68  | 0.549 |
| 83 | IPI00029739 | 1 | 52.1 | 0.7 | 0.16 | 204 | ## | CFH Isoform 1 of Complement factor H precursor | n[145]CTLK[272]PCDYDPIK[272]            | 3 | 640.6536  | 3.659 | 0.362 |
| 83 | IPI00029739 | 1 | 52.1 | 0.7 | 0.16 | 204 | ## | CFH Isoform 1 of Complement factor H precursor | n[145]CYFPYLENGYNQNYGR                  | 3 | 730.988   | 3.345 | 0.335 |
| 83 | IPI00029739 | 1 | 52.1 | 0.7 | 0.16 | 204 | ## | CFH Isoform 1 of Complement factor H precursor | n[145]DTSCVNPPTVQNAYIVSR                | 3 | 718.6862  | 3.799 | 0.441 |
| 83 | IPI00029739 | 1 | 52.1 | 0.7 | 0.16 | 204 | ## | CFH Isoform 1 of Complement factor H precursor | n[145]EYHFGQAVR                         | 3 | 417.5515  | 3.862 | 0.284 |
| 83 | IPI00029739 | 1 | 52.1 | 0.7 | 0.16 | 204 | ## | CFH Isoform 1 of Complement factor H precursor | n[145]GDAVCTESGWRPLPSCEEK[272]          | 3 | 815.3701  | 5.03  | 0.527 |
| 83 | IPI00029739 | 1 | 52.1 | 0.7 | 0.16 | 204 | ## | CFH Isoform 1 of Complement factor H precursor | n[145]HGGLYHENMR                        | 3 | 453.2232  | 3.656 | 0.376 |
| 83 | IPI00029739 | 1 | 52.1 | 0.7 | 0.16 | 204 | ## | CFH Isoform 1 of Complement factor H precursor | n[145]IVSSAMEPDREYHFGQAVR               | 3 | 779.3906  | 4.058 | 0.286 |
| 83 | IPI00029739 | 1 | 52.1 | 0.7 | 0.16 | 204 | ## | CFH Isoform 1 of Complement factor H precursor | n[145]SIDVACHPGYALPK[272]               | 3 | 602.3158  | 4.48  | 0.433 |
| 83 | IPI00029739 | 1 | 52.1 | 0.7 | 0.16 | 204 | ## | CFH Isoform 1 of Complement factor H precursor | n[145]SSIDIENGFISESQYTYALK[272]         | 3 | 851.7703  | 4.726 | 0.393 |
| 83 | IPI00029739 | 1 | 52.1 | 0.7 | 0.16 | 204 | ## | CFH Isoform 1 of Complement factor H precursor | n[145]SSNLILLEHLK[272]                  | 3 | 562.001   | 4.649 | 0.328 |
| 83 | IPI00029739 | 1 | 52.1 | 0.7 | 0.16 | 204 | ## | CFH Isoform 1 of Complement factor H precursor | n[145]SSQESYAHGTK[272]                  | 3 | 494.9191  | 3.761 | 0.441 |
| 83 | IPI00029739 | 1 | 52.1 | 0.7 | 0.16 | 204 | ## | CFH Isoform 1 of Complement factor H precursor | n[145]SVQCYHFGLSPDLPIK[272]             | 3 | 763.0377  | 5.332 | 0.417 |
| 83 | IPI00029739 | 1 | 52.1 | 0.7 | 0.16 | 204 | ## | CFH Isoform 1 of Complement factor H precursor | n[145]TK[272]EEYGHSEVVEYYCNPR           | 3 | 846.3942  | 4.189 | 0.417 |
| 83 | IPI00029739 | 1 | 52.1 | 0.7 | 0.16 | 204 | ## | CFH Isoform 1 of Complement factor H precursor | HGGLYHENMR                              | 4 | 339.1675  | 3.917 | 0.431 |
| 83 | IPI00029739 | 1 | 52.1 | 0.7 | 0.16 | 204 | ## | CFH Isoform 1 of Complement factor H precursor | n[145]IVSSAMEPDREYHFGQAVR               | 4 | 584.7948  | 3.125 | 0.213 |
| 83 | IPI00029739 | 1 | 52.1 | 0.7 | 0.16 | 204 | ## | CFH Isoform 1 of Complement factor H precursor | n[145]RPGCGHPGDTFPGFTTLTGGNVFEYGVK[272] | 4 | 797.8939  | 4.402 | 0.35  |
| 83 | IPI00029739 | 1 | 52.1 | 0.7 | 0.16 | 204 | ## | CFH Isoform 1 of Complement factor H precursor | n[145]SPPEISHGVVAHMSDSYQYGEEVTK[272]    | 4 | 800.3878  | 4.281 | 0.357 |
| 83 | IPI00029739 | 1 | 52.1 | 0.7 | 0.16 | 204 | ## | CFH Isoform 1 of Complement factor H precursor | RPYFPVAVGK                              | 3 | 471.9504  | 3.43  | 0.212 |
| 83 | IPI00029739 | 1 | 52.1 | 0.7 | 0.16 | 204 | ## | CFH Isoform 1 of Complement factor H precursor | n[145]EFDHNSNIR                         | 3 | 425.8781  | 2.969 | 0.345 |
| 83 | IPI00029739 | 1 | 52.1 | 0.7 | 0.16 | 204 | ## | CFH Isoform 1 of Complement factor H precursor | n[145]IEGDEEMHCSDDGFWSK[272]            | 3 | 773.6584  | 3.818 | 0.315 |
| 83 | IPI00029739 | 1 | 52.1 | 0.7 | 0.16 | 204 | ## | CFH Isoform 1 of Complement factor H precursor | n[145]IVSSAM[147]EPDREYHFGQAVR          | 3 | 784.7223  | 3.334 | 0.397 |
| 83 | IPI00029739 | 1 | 52.1 | 0.7 | 0.16 | 204 | ## | CFH Isoform 1 of Complement factor H precursor | n[145]RPYFPVAVGK[272]                   | 3 | 474.6218  | 3.399 | 0.296 |
| 83 | IPI00029739 | 1 | 52.1 | 0.7 | 0.16 | 204 | ## | CFH Isoform 1 of Complement factor H precursor | n[145]TK[272]EEYGHSEVVEYYCNPR           | 4 | 635.0475  | 3.676 | 0.419 |
| 83 | IPI00029739 | 1 | 52.1 | 0.7 | 0.16 | 204 | ## | CFH Isoform 1 of Complement factor H precursor | CTLKPCDYDPIK                            | 2 | 954.4662  | 3.475 | 0.416 |
| 83 | IPI00029739 | 1 | 52.1 | 0.7 | 0.16 | 204 | ## | CFH Isoform 1 of Complement factor H precursor | n[145]CFEGFGIDGPAIAK[272]               | 2 | 879.9435  | 3.483 | 0.466 |
| 83 | IPI00029739 | 1 | 52.1 | 0.7 | 0.16 | 204 | ## | CFH Isoform 1 of Complement factor H precursor | n[145]CLPVTAPENGGK[272]                 | 2 | 731.8855  | 3.271 | 0.306 |
| 83 | IPI00029739 | 1 | 52.1 | 0.7 | 0.16 | 204 | ## | CFH Isoform 1 of Complement factor H precursor | n[145]CNMGYEYSER                        | 2 | 721.287   | 2.997 | 0.465 |
| 83 | IPI00029739 | 1 | 52.1 | 0.7 | 0.16 | 204 | ## | CFH Isoform 1 of Complement factor H precursor | n[145]SSNLILLEHLK[272]                  | 2 | 842.4978  | 4.21  | 0.306 |
| 83 | IPI00029739 | 1 | 52.1 | 0.7 | 0.16 | 204 | ## | CFH Isoform 1 of Complement factor H precursor | n[145]TDCLSLPSFENAIPMGEK[272]           | 2 | 1143.5566 | 3.515 | 0.49  |
| 83 | IPI00029739 | 1 | 52.1 | 0.7 | 0.16 | 204 | ## | CFH Isoform 1 of Complement factor H precursor | n[145]IVSSAM[147]EPDREYHFGQAVR          | 4 | 588.7936  | 3.161 | 0.279 |
| 83 | IPI00029739 | 1 | 52.1 | 0.7 | 0.16 | 204 | ## | CFH Isoform 1 of Complement factor H precursor | SSNLILLEHLK                             | 2 | 838.4907  | 4.048 | 0.291 |
| 83 | IPI00029739 | 1 | 52.1 | 0.7 | 0.16 | 204 | ## | CFH Isoform 1 of Complement factor H precursor | SSQESYAHGTK                             | 2 | 737.8679  | 3.363 | 0.452 |
| 83 | IPI00029739 | 1 | 52.1 | 0.7 | 0.16 | 204 | ## | CFH Isoform 1 of Complement factor H precursor | n[145]CTLK[272]PCDYDPIK[272]            | 2 | 960.4768  | 3.3   | 0.341 |
| 83 | IPI00029739 | 1 | 52.1 | 0.7 | 0.16 | 204 | ## | CFH Isoform 1 of Complement factor H precursor | n[145]EIMENYNIALR                       | 2 | 755.3962  | 3.934 | 0.346 |
| 83 | IPI00029739 | 1 | 52.1 | 0.7 | 0.16 | 204 | ## | CFH Isoform 1 of Complement factor H precursor | n[145]LSYTCEGGFR                        | 2 | 661.8031  | 1.437 | 0.133 |
| 83 | IPI00029739 | 1 | 52.1 | 0.7 | 0.16 | 204 | ## | CFH Isoform 1 of Complement factor H precursor | SVQCYHFGLSPDLPIK                        | 3 | 760.3663  | 4.251 | 0.388 |
| 83 | IPI00029739 | 1 | 52.1 | 0.7 | 0.16 | 204 | ## | CFH Isoform 1 of Complement factor H precursor | n[145]AVYTCNEGYQLLGEINYR                | 3 | 766.0335  | 3.315 | 0.237 |
| 83 | IPI00029739 | 1 | 52.1 | 0.7 | 0.16 | 204 | ## | CFH Isoform 1 of Complement factor H precursor | n[145]CLHPCVISR                         | 3 | 421.8699  | 2.184 | 0.298 |
| 83 | IPI00029739 | 1 | 52.1 | 0.7 | 0.16 | 204 | ## | CFH Isoform 1 of Complement factor H precursor | n[145]IIYK[272]ENERFQYK[272]            | 3 | 688.3932  | 3.792 | 0.257 |
| 83 | IPI00029739 | 1 | 52.1 | 0.7 | 0.16 | 204 | ## | CFH Isoform 1 of Complement factor H precursor | n[145]NK[272]K[272]EFDHNSNIR            | 3 | 645.3571  | 2.512 | 0.353 |
| 83 | IPI00029739 | 1 | 52.1 | 0.7 | 0.16 | 204 | ## | CFH Isoform 1 of Complement factor H precursor | n[145]EYHFGQAVR                         | 2 | 625.8236  | 2.745 | 0.335 |

|    |             |   |      |     |      |     |    |                                                |                                             |   |           |       |       |
|----|-------------|---|------|-----|------|-----|----|------------------------------------------------|---------------------------------------------|---|-----------|-------|-------|
| 83 | IPI00029739 | 1 | 52.1 | 0.7 | 0.16 | 204 | ## | CFH Isoform 1 of Complement factor H precursor | n[145]SCDIPVFMNAR                           | 2 | 721.8392  | 3.047 | 0.264 |
| 83 | IPI00029739 | 1 | 52.1 | 0.7 | 0.16 | 204 | ## | CFH Isoform 1 of Complement factor H precursor | n[145]SCDNPYIPNGDYSPLR                      | 2 | 1000.9518 | 3.455 | 0.284 |
| 83 | IPI00029739 | 1 | 52.1 | 0.7 | 0.16 | 204 | ## | CFH Isoform 1 of Complement factor H precursor | CLPVTAPEN GK                                | 2 | 727.8784  | 3.624 | 0.237 |
| 83 | IPI00029739 | 1 | 52.1 | 0.7 | 0.16 | 204 | ## | CFH Isoform 1 of Complement factor H precursor | CVEISCK                                     | 2 | 577.2655  | 2.689 | 0.255 |
| 83 | IPI00029739 | 1 | 52.1 | 0.7 | 0.16 | 204 | ## | CFH Isoform 1 of Complement factor H precursor | LEYPTCAK                                    | 2 | 625.8173  | 2.06  | 0.264 |
| 83 | IPI00029739 | 1 | 52.1 | 0.7 | 0.16 | 204 | ## | CFH Isoform 1 of Complement factor H precursor | n[145]CNM[147]GYEYSER                       | 2 | 729.2844  | 2.525 | 0.376 |
| 83 | IPI00029739 | 1 | 52.1 | 0.7 | 0.16 | 204 | ## | CFH Isoform 1 of Complement factor H precursor | n[145]TDCLSLPSFENAIIPM[147]GEK[272]         | 2 | 1151.554  | 2.275 | 0.123 |
| 83 | IPI00029739 | 1 | 52.1 | 0.7 | 0.16 | 204 | ## | CFH Isoform 1 of Complement factor H precursor | RPYFPVAVGK                                  | 2 | 707.4219  | 3.215 | 0.194 |
| 83 | IPI00029739 | 1 | 52.1 | 0.7 | 0.16 | 204 | ## | CFH Isoform 1 of Complement factor H precursor | n[145]IVSSAM[147]EPDR                       | 2 | 632.8198  | 2.99  | 0.259 |
| 83 | IPI00029739 | 1 | 52.1 | 0.7 | 0.16 | 204 | ## | CFH Isoform 1 of Complement factor H precursor | n[145]SCDIPVFM[147]NAR                      | 2 | 729.8366  | 2.618 | 0.325 |
| 83 | IPI00029739 | 1 | 52.1 | 0.7 | 0.16 | 204 | ## | CFH Isoform 1 of Complement factor H precursor | SLGNVIM[147]VCR                             | 2 | 647.3274  | 3.172 | 0.214 |
| 83 | IPI00029739 | 1 | 52.1 | 0.7 | 0.16 | 204 | ## | CFH Isoform 1 of Complement factor H precursor | n[145]CVEISCK[272]                          | 2 | 581.2726  | 2.338 | 0.314 |
| 83 | IPI00029739 | 1 | 52.1 | 0.7 | 0.16 | 204 | ## | CFH Isoform 1 of Complement factor H precursor | n[145]LEYPTCAK[272]                         | 2 | 629.8244  | 2.457 | 0.162 |
| 83 | IPI00029739 | 1 | 52.1 | 0.7 | 0.16 | 204 | ## | CFH Isoform 1 of Complement factor H precursor | n[145]SLGNVIM[147]VCR                       | 2 | 649.331   | 2.73  | 0.346 |
| 83 | IPI00029739 | 1 | 52.1 | 0.7 | 0.16 | 204 | ## | CFH Isoform 1 of Complement factor H precursor | n[145]NK[272]K[272]EFDHNSNIR                | 5 | 387.6172  | 2.197 | 0.121 |
| 83 | IPI00029739 | 1 | 52.1 | 0.7 | 0.16 | 204 | ## | CFH Isoform 1 of Complement factor H precursor | n[145]IEGDEEM[147]HCSDDGFWSK[272]           | 3 | 778.99    | 3.212 | 0.275 |
| 83 | IPI00029739 | 1 | 52.1 | 0.7 | 0.16 | 204 | ## | CFH Isoform 1 of Complement factor H precursor | n[145]IYK[272]ENERFQYK[272]                 | 4 | 516.5467  | 2.44  | 0.229 |
| 83 | IPI00029739 | 1 | 52.1 | 0.7 | 0.16 | 204 | ## | CFH Isoform 1 of Complement factor H precursor | n[145]NGFYPATR                              | 2 | 535.281   | 2.199 | 0.248 |
| 83 | IPI00029739 | 1 | 52.1 | 0.7 | 0.16 | 204 | ## | CFH Isoform 1 of Complement factor H precursor | n[145]TGDEITYQCR                            | 2 | 688.3088  | 2.529 | 0.358 |
| 83 | IPI00029739 | 1 | 52.1 | 0.7 | 0.16 | 204 | ## | CFH Isoform 1 of Complement factor H precursor | TGESVEFVCK                                  | 2 | 712.8493  | 2.499 | 0.303 |
| 83 | IPI00029739 | 1 | 52.1 | 0.7 | 0.16 | 204 | ## | CFH Isoform 1 of Complement factor H precursor | IYKENERFQYK                                 | 3 | 684.3861  | 3.334 | 0.237 |
| 83 | IPI00029739 | 1 | 52.1 | 0.7 | 0.16 | 204 | ## | CFH Isoform 1 of Complement factor H precursor | n[145]EFDHNSNIR                             | 2 | 638.3136  | 2.518 | 0.268 |
| 83 | IPI00029739 | 1 | 52.1 | 0.7 | 0.16 | 204 | ## | CFH Isoform 1 of Complement factor H precursor | n[145]TGESVEFVCK[272]R                      | 3 | 530.2737  | 3.5   | 0.093 |
| 83 | IPI00029739 | 1 | 52.1 | 0.7 | 0.16 | 204 | ## | CFH Isoform 1 of Complement factor H precursor | TGESVEFVCKR                                 | 3 | 527.6023  | 3.169 | 0.111 |
| 83 | IPI00029739 | 1 | 52.1 | 0.7 | 0.16 | 204 | ## | CFH Isoform 1 of Complement factor H precursor | n[145]RPYFPVAVGK[272]                       | 2 | 711.429   | 3.304 | 0.147 |
| 83 | IPI00029739 | 1 | 52.1 | 0.7 | 0.16 | 204 | ## | CFH Isoform 1 of Complement factor H precursor | n[145]IDVHLVPDR                             | 2 | 604.3494  | 2.726 | 0.218 |
| 83 | IPI00029739 | 1 | 52.1 | 0.7 | 0.16 | 204 | ## | CFH Isoform 1 of Complement factor H precursor | n[145]TDCLSLPSFENAIIPM[147]GEK[272]         | 3 | 768.0384  | 2.566 | 0.256 |
| 83 | IPI00029739 | 1 | 52.1 | 0.7 | 0.16 | 204 | ## | CFH Isoform 1 of Complement factor H precursor | n[145]NDFTWFK[272]                          | 2 | 623.329   | 2.202 | 0.137 |
| 83 | IPI00029739 | 1 | 52.1 | 0.7 | 0.16 | 204 | ## | CFH Isoform 1 of Complement factor H precursor | IEGDEEM[147]HCSDDGFWSK[272]                 | 3 | 777.6543  | 2.55  | 0.338 |
| 83 | IPI00029739 | 1 | 52.1 | 0.7 | 0.16 | 204 | ## | CFH Isoform 1 of Complement factor H precursor | IYKENER                                     | 2 | 672.8854  | 3.198 | 0.23  |
| 83 | IPI00029739 | 1 | 52.1 | 0.7 | 0.16 | 204 | ## | CFH Isoform 1 of Complement factor H precursor | n[145]ECEL PK[272]                          | 2 | 526.7716  | 2.214 | 0.141 |
| 83 | IPI00029739 | 1 | 52.1 | 0.7 | 0.16 | 204 | ## | CFH Isoform 1 of Complement factor H precursor | NDFTWFK                                     | 2 | 619.3219  | 2.296 | 0.114 |
| 83 | IPI00029739 | 1 | 52.1 | 0.7 | 0.16 | 204 | ## | CFH Isoform 1 of Complement factor H precursor | n[145]SPPEISHGVVAHM[147]SDSYQYGEEV TYK[272] | 4 | 804.3865  | 2.679 | 0.2   |
| 83 | IPI00029739 | 1 | 52.1 | 0.7 | 0.16 | 204 | ## | CFH Isoform 1 of Complement factor H precursor | ECEL PK                                     | 2 | 522.7645  | 1.818 | 0.199 |
| 83 | IPI00029739 | 1 | 52.1 | 0.7 | 0.16 | 204 | ## | CFH Isoform 1 of Complement factor H precursor | n[145]IEDCNELPRR                            | 3 | 473.5594  | 2.608 | 0.296 |
| 83 | IPI00029739 | 1 | 52.1 | 0.7 | 0.16 | 204 | ## | CFH Isoform 1 of Complement factor H precursor | n[145]SPPEISHGVVAH                          | 3 | 458.5813  | 3.436 | 0.244 |
| 83 | IPI00029739 | 1 | 52.1 | 0.7 | 0.16 | 204 | ## | CFH Isoform 1 of Complement factor H precursor | n[145]IYK[272]ENER                          | 2 | 676.8925  | 2.726 | 0.237 |
| 83 | IPI00029739 | 1 | 52.1 | 0.7 | 0.16 | 204 | ## | CFH Isoform 1 of Complement factor H precursor | n[145]HGGLYHENMR                            | 2 | 679.3312  | 2.793 | 0.417 |
| 83 | IPI00029739 | 1 | 52.1 | 0.7 | 0.16 | 204 | ## | CFH Isoform 1 of Complement factor H precursor | n[145]WSHPPSCIK                             | 2 | 692.853   | 3.003 | 0.25  |
| 83 | IPI00029739 | 1 | 52.1 | 0.7 | 0.16 | 204 | ## | CFH Isoform 1 of Complement factor H precursor | n[145]IVSSAMEPDR                            | 2 | 624.8224  | 1.829 | 0.146 |
| 83 | IPI00029739 | 1 | 52.1 | 0.7 | 0.16 | 204 | ## | CFH Isoform 1 of Complement factor H precursor | n[145]TTCWDGK[272]                          | 2 | 572.7721  | 1.69  | 0.116 |
| 83 | IPI00029739 | 1 | 52.1 | 0.7 | 0.16 | 204 | ## | CFH Isoform 1 of Complement factor H precursor | KDVYK                                       | 3 | 358.222   | 1.863 | 0.172 |
| 83 | IPI00029739 | 1 | 52.1 | 0.7 | 0.16 | 204 | ## | CFH Isoform 1 of Complement factor H precursor | n[145]IYK[272]ENER                          | 3 | 451.5974  | 2.69  | 0.09  |
| 83 | IPI00029739 | 1 | 52.1 | 0.7 | 0.16 | 204 | ## | CFH Isoform 1 of Complement factor H precursor | n[145]WSSPPQCEGLPCK                         | 2 | 904.4097  | 3.321 | 0.404 |
| 83 | IPI00029739 | 1 | 52.1 | 0.7 | 0.16 | 204 | ## | CFH Isoform 1 of Complement factor H precursor | n[145]WQSIPLCVEK                            | 2 | 766.9079  | 3.718 | 0.198 |
| 83 | IPI00029739 | 1 | 52.1 | 0.7 | 0.16 | 204 | ## | CFH Isoform 1 of Complement factor H precursor | n[145]TLTGGNVFEYGVK[272]                    | 2 | 836.9611  | 3.283 | 0.428 |
| 83 | IPI00029739 | 1 | 52.1 | 0.7 | 0.16 | 204 | ## | CFH Isoform 1 of Complement factor H precursor | NKKEFDHNSNIR                                | 3 | 641.35    | 2.77  | 0.098 |
| 83 | IPI00029739 | 1 | 52.1 | 0.7 | 0.16 | 204 | ## | CFH Isoform 1 of Complement factor H precursor | IYKENER                                     | 3 | 448.926   | 2.332 | 0.112 |

|    |             |   |      |      |      |     |    |                                                |                                     |   |          |       |       |
|----|-------------|---|------|------|------|-----|----|------------------------------------------------|-------------------------------------|---|----------|-------|-------|
| 83 | IPI00029739 | 1 | 52.1 | 0.7  | 0.16 | 204 | ## | CFH Isoform 1 of Complement factor H precursor | n[145]RPCGHPGDTPFQGF                | 3 | 560.2577 | 2.769 | 0.25  |
| 83 | IPI00029739 | 1 | 52.1 | 0.7  | 0.16 | 204 | ## | CFH Isoform 1 of Complement factor H precursor | n[145]EDCNELPPR                     | 2 | 631.7849 | 2.621 | 0.229 |
| 83 | IPI00029739 | 1 | 52.1 | 0.7  | 0.16 | 204 | ## | CFH Isoform 1 of Complement factor H precursor | KFVQGK                              | 2 | 563.8585 | 2.067 | 0.123 |
| 83 | IPI00029739 | 1 | 52.1 | 0.7  | 0.16 | 204 | ## | CFH Isoform 1 of Complement factor H precursor | n[145]SIDVACHPGY                    | 2 | 626.2846 | 2.861 | 0.397 |
| 83 | IPI00029739 | 1 | 52.1 | 0.7  | 0.16 | 204 | ## | CFH Isoform 1 of Complement factor H precursor | KEFDHNSNIR                          | 3 | 513.9391 | 2.22  | 0.031 |
| 83 | IPI00029739 | 1 | 52.1 | 0.7  | 0.16 | 204 | ## | CFH Isoform 1 of Complement factor H precursor | n[145]WQSIPLCVEK[272]               | 3 | 512.9434 | 1.936 | 0.09  |
| 83 | IPI00029739 | 1 | 52.1 | 0.7  | 0.16 | 204 | ## | CFH Isoform 1 of Complement factor H precursor | SPPQCEGLPCK                         | 2 | 765.8504 | 2.897 | 0.241 |
| 83 | IPI00029739 | 1 | 52.1 | 0.7  | 0.16 | 204 | ## | CFH Isoform 1 of Complement factor H precursor | FSCKPGFTIVGPN                       | 2 | 846.9337 | 2.992 | 0.321 |
| 83 | IPI00029739 | 1 | 52.1 | 0.7  | 0.16 | 204 | ## | CFH Isoform 1 of Complement factor H precursor | AKYQCK                              | 2 | 603.828  | 1.817 | 0.123 |
| 83 | IPI00029739 | 1 | 52.1 | 0.7  | 0.16 | 204 | ## | CFH Isoform 1 of Complement factor H precursor | n[145]GFYPATR                       | 2 | 478.2595 | 2.28  | 0.254 |
| 83 | IPI00029739 | 1 | 52.1 | 0.7  | 0.16 | 204 | ## | CFH Isoform 1 of Complement factor H precursor | n[145]WSPHPPSCIK                    | 3 | 462.2377 | 2.295 | 0.165 |
| 83 | IPI00029739 | 1 | 52.1 | 0.7  | 0.16 | 204 | ## | CFH Isoform 1 of Complement factor H precursor | n[145]SCDIPVFM[147]NAR              | 3 | 486.8935 | 2.162 | 0.017 |
| 83 | IPI00029739 | 1 | 52.1 | 0.7  | 0.16 | 204 | ## | CFH Isoform 1 of Complement factor H precursor | GLSPDLPICK                          | 2 | 684.8726 | 2.607 | 0.252 |
| 83 | IPI00029739 | 1 | 52.1 | 0.7  | 0.16 | 204 | ## | CFH Isoform 1 of Complement factor H precursor | n[145]KGVEWVALNPLR                  | 3 | 522.9794 | 2.812 | 0.033 |
| 83 | IPI00029739 | 1 | 52.1 | 0.7  | 0.16 | 204 | ## | CFH Isoform 1 of Complement factor H precursor | n[145]JAK[272]YQCK[272]             | 3 | 406.8948 | 2.253 | 0.025 |
| 83 | IPI00029739 | 1 | 52.1 | 0.7  | 0.16 | 204 | ## | CFH Isoform 1 of Complement factor H precursor | GDAVCTESGWRPLPSCEEK[272]            | 3 | 814.0344 | 2.489 | 0.171 |
| 83 | IPI00029739 | 1 | 52.1 | 0.7  | 0.16 | 204 | ## | CFH Isoform 1 of Complement factor H precursor | n[145]KGVEWVALNPLRK                 | 3 | 612.3761 | 3.069 | 0.094 |
| 83 | IPI00029739 | 1 | 52.1 | 0.7  | 0.16 | 204 | ## | CFH Isoform 1 of Complement factor H precursor | HFGLSPDLPICK                        | 3 | 551.6266 | 2.987 | 0.107 |
| 83 | IPI00029739 | 1 | 52.1 | 0.7  | 0.16 | 204 | ## | CFH Isoform 1 of Complement factor H precursor | IVSSAMEPDR                          | 2 | 622.8188 | 1.521 | 0.053 |
| 83 | IPI00029739 | 1 | 52.1 | 0.7  | 0.16 | 204 | ## | CFH Isoform 1 of Complement factor H precursor | NKKEFDHNSNIR                        | 4 | 481.2644 | 2.107 | 0.206 |
| 83 | IPI00029739 | 1 | 52.1 | 0.7  | 0.16 | 204 | ## | CFH Isoform 1 of Complement factor H precursor | n[145]DGSWAQPTCIK                   | 2 | 768.377  | 2.816 | 0.122 |
| 83 | IPI00029739 | 1 | 52.1 | 0.7  | 0.16 | 204 | ## | CFH Isoform 1 of Complement factor H precursor | n[145]FSCK[272]PGFTIVGPN            | 2 | 850.9408 | 2.711 | 0.275 |
| 83 | IPI00029739 | 1 | 52.1 | 0.7  | 0.16 | 204 | ## | CFH Isoform 1 of Complement factor H precursor | K[272]GEWVALNPLR                    | 2 | 783.9655 | 2.459 | 0.008 |
| 83 | IPI00029739 | 1 | 52.1 | 0.7  | 0.16 | 204 | ## | CFH Isoform 1 of Complement factor H precursor | RPCGHPGDTPFQGF                      | 3 | 558.922  | 2.027 | 0.133 |
| 83 | IPI00029739 | 1 | 52.1 | 0.7  | 0.16 | 204 | ## | CFH Isoform 1 of Complement factor H precursor | n[145]JAYIVSR                       | 2 | 426.7566 | 2.161 | 0.139 |
| 83 | IPI00029739 | 1 | 52.1 | 0.7  | 0.16 | 204 | ## | CFH Isoform 1 of Complement factor H precursor | n[145]LEYPTCA                       | 1 | 986.4444 | 1.966 | 0.147 |
| 83 | IPI00029739 | 1 | 52.1 | 0.7  | 0.16 | 204 | ## | CFH Isoform 1 of Complement factor H precursor | n[145]DVHLVDR                       | 2 | 547.8074 | 2.118 | 0.132 |
| 83 | IPI00029739 | 1 | 52.1 | 0.7  | 0.16 | 204 | ## | CFH Isoform 1 of Complement factor H precursor | n[145]EDCNELPPRR                    | 2 | 709.8355 | 2.092 | 0.106 |
| 83 | IPI00029739 | 1 | 52.1 | 0.7  | 0.16 | 204 | ## | CFH Isoform 1 of Complement factor H precursor | DTSCVNPPTVQ                         | 2 | 673.8076 | 1.634 | 0.169 |
| 83 | IPI00029739 | 1 | 52.1 | 0.7  | 0.16 | 204 | ## | CFH Isoform 1 of Complement factor H precursor | SPLR                                | 1 | 612.3828 | 1.332 | 0.125 |
| 84 | IPI00029863 | 1 | 33   | 0.77 | 0.17 | 53  | 26 | SERPINF2 SERPINF2 protein                      | n[145]LCQDLGPGAFR                   | 2 | 683.84   | 3.6   | 0.486 |
| 84 | IPI00029863 | 1 | 33   | 0.77 | 0.17 | 53  | 26 | SERPINF2 SERPINF2 protein                      | n[145]LGNQEPGGQTALK[272]            | 2 | 800.9485 | 4.823 | 0.358 |
| 84 | IPI00029863 | 1 | 33   | 0.77 | 0.17 | 53  | 26 | SERPINF2 SERPINF2 protein                      | WFLLEQPEIQVAHFPPK                   | 3 | 803.7755 | 4.301 | 0.405 |
| 84 | IPI00029863 | 1 | 33   | 0.77 | 0.17 | 53  | 26 | SERPINF2 SERPINF2 protein                      | n[145]GDK[272]LFGPDLK[272]          | 3 | 507.9716 | 3.87  | 0.324 |
| 84 | IPI00029863 | 1 | 33   | 0.77 | 0.17 | 53  | 26 | SERPINF2 SERPINF2 protein                      | n[145]GFPIK[272]EDFLEQSEQFLGAK[272] | 3 | 872.4742 | 4.638 | 0.5   |
| 84 | IPI00029863 | 1 | 33   | 0.77 | 0.17 | 53  | 26 | SERPINF2 SERPINF2 protein                      | n[145]WFLLEQPEIQVAHFPPK             | 3 | 805.1112 | 4.931 | 0.423 |
| 84 | IPI00029863 | 1 | 33   | 0.77 | 0.17 | 53  | 26 | SERPINF2 SERPINF2 protein                      | LGNQEPGGQTALK                       | 2 | 796.9414 | 4.529 | 0.366 |
| 84 | IPI00029863 | 1 | 33   | 0.77 | 0.17 | 53  | 26 | SERPINF2 SERPINF2 protein                      | ELKEQQDSPGNK                        | 3 | 598.3233 | 3.95  | 0.386 |
| 84 | IPI00029863 | 1 | 33   | 0.77 | 0.17 | 53  | 26 | SERPINF2 SERPINF2 protein                      | GDKLFGPDLK                          | 3 | 503.9645 | 3.407 | 0.317 |
| 84 | IPI00029863 | 1 | 33   | 0.77 | 0.17 | 53  | 26 | SERPINF2 SERPINF2 protein                      | n[145]LQQVLHAGSGPCLPHLLSR           | 4 | 554.8033 | 3.644 | 0.354 |
| 84 | IPI00029863 | 1 | 33   | 0.77 | 0.17 | 53  | 26 | SERPINF2 SERPINF2 protein                      | n[145]DSFHLDEQFTVPVEMMQAR           | 3 | 808.7197 | 3.473 | 0.245 |
| 84 | IPI00029863 | 1 | 33   | 0.77 | 0.17 | 53  | 26 | SERPINF2 SERPINF2 protein                      | n[145]ELK[272]EQQDSPGNK[272]        | 3 | 602.3304 | 3.886 | 0.322 |
| 84 | IPI00029863 | 1 | 33   | 0.77 | 0.17 | 53  | 26 | SERPINF2 SERPINF2 protein                      | n[145]DFLQSLK[272]                  | 2 | 569.8392 | 2.613 | 0.155 |
| 84 | IPI00029863 | 1 | 33   | 0.77 | 0.17 | 53  | 26 | SERPINF2 SERPINF2 protein                      | n[145]LQQVLHAGSGPCLPH               | 3 | 582.9682 | 2.81  | 0.399 |
| 84 | IPI00029863 | 1 | 33   | 0.77 | 0.17 | 53  | 26 | SERPINF2 SERPINF2 protein                      | DFLQSLK                             | 2 | 565.8321 | 1.699 | 0.012 |
| 84 | IPI00029863 | 1 | 33   | 0.77 | 0.17 | 53  | 26 | SERPINF2 SERPINF2 protein                      | n[145]LFGPDLK[272]                  | 2 | 539.331  | 2.089 | 0.004 |
| 84 | IPI00029863 | 1 | 33   | 0.77 | 0.17 | 53  | 26 | SERPINF2 SERPINF2 protein                      | n[145]NK[272]FDPSLTQR               | 2 | 747.4194 | 2.535 | 0.309 |
| 84 | IPI00029863 | 1 | 33   | 0.77 | 0.17 | 53  | 26 | SERPINF2 SERPINF2 protein                      | NKFDPSLTQR                          | 2 | 743.4123 | 2.556 | 0.293 |

|    |             |   |      |      |      |    |    |                                   |                                       |   |           |       |       |
|----|-------------|---|------|------|------|----|----|-----------------------------------|---------------------------------------|---|-----------|-------|-------|
| 84 | IPI00029863 | 1 | 33   | 0.77 | 0.17 | 53 | 26 | SERPINF2 SERPINF2 protein         | n[145]FDPSLTQR                        | 2 | 554.2994  | 2.014 | 0.076 |
| 84 | IPI00029863 | 1 | 33   | 0.77 | 0.17 | 53 | 26 | SERPINF2 SERPINF2 protein         | NQEQVSPLTLK                           | 2 | 825.4829  | 3.878 | 0.19  |
| 84 | IPI00029863 | 1 | 33   | 0.77 | 0.17 | 53 | 26 | SERPINF2 SERPINF2 protein         | n[145]NQEQVSPLTLK[272]                | 2 | 829.49    | 4.108 | 0.243 |
| 84 | IPI00029863 | 1 | 33   | 0.77 | 0.17 | 53 | 26 | SERPINF2 SERPINF2 protein         | LQQVLHAGSGPCLPH                       | 2 | 871.9451  | 3.83  | 0.38  |
| 84 | IPI00029863 | 1 | 33   | 0.77 | 0.17 | 53 | 26 | SERPINF2 SERPINF2 protein         | n[145]MYLQK[272]                      | 2 | 485.7854  | 1.618 | 0.073 |
| 84 | IPI00029863 | 1 | 33   | 0.77 | 0.17 | 53 | 26 | SERPINF2 SERPINF2 protein         | n[145]LQQVLHAGSGPCLPH                 | 2 | 873.9486  | 4.281 | 0.382 |
| 84 | IPI00029863 | 1 | 33   | 0.77 | 0.17 | 53 | 26 | SERPINF2 SERPINF2 protein         | EQQDSPGNKDFLQSLK                      | 3 | 752.0658  | 2.39  | 0.172 |
| 84 | IPI00029863 | 1 | 33   | 0.77 | 0.17 | 53 | 26 | SERPINF2 SERPINF2 protein         | NPNPSAPR                              | 2 | 496.7673  | 1.251 | 0.16  |
| 84 | IPI00029863 | 1 | 33   | 0.77 | 0.17 | 53 | 26 | SERPINF2 SERPINF2 protein         | GFPIKEDFLEQSEQLFGAK                   | 3 | 868.4671  | 2.34  | 0.187 |
| 84 | IPI00029863 | 1 | 33   | 0.77 | 0.17 | 53 | 26 | SERPINF2 SERPINF2 protein         | n[145]LQQVLH                          | 2 | 441.2699  | 1.88  | 0.036 |
| 85 | IPI00030739 | 1 | 54.3 | 0.85 | 0.06 | 29 | 16 | APOM Apolipoprotein M             | SLTSCLDK                              | 2 | 640.3229  | 1.671 | 0.188 |
| 85 | IPI00030739 | 1 | 54.3 | 0.85 | 0.06 | 29 | 16 | APOM Apolipoprotein M             | WIYHLEGTSTDLR                         | 2 | 865.9467  | 3.849 | 0.377 |
| 85 | IPI00030739 | 1 | 54.3 | 0.85 | 0.06 | 29 | 16 | APOM Apolipoprotein M             | n[145]SLTSCLDK[272]                   | 2 | 644.33    | 1.95  | 0.1   |
| 85 | IPI00030739 | 1 | 54.3 | 0.85 | 0.06 | 29 | 16 | APOM Apolipoprotein M             | n[145]AFLLTPR                         | 2 | 481.3012  | 2.34  | 0.184 |
| 85 | IPI00030739 | 1 | 54.3 | 0.85 | 0.06 | 29 | 16 | APOM Apolipoprotein M             | n[145]DGLCVPR                         | 2 | 475.2394  | 1.709 | 0.143 |
| 85 | IPI00030739 | 1 | 54.3 | 0.85 | 0.06 | 29 | 16 | APOM Apolipoprotein M             | n[145]FLLYNR                          | 1 | 969.5639  | 2.045 | 0.182 |
| 85 | IPI00030739 | 1 | 54.3 | 0.85 | 0.06 | 29 | 16 | APOM Apolipoprotein M             | n[145]FLLYNR                          | 2 | 485.2856  | 1.891 | 0.066 |
| 85 | IPI00030739 | 1 | 54.3 | 0.85 | 0.06 | 29 | 16 | APOM Apolipoprotein M             | DGLCVPR                               | 2 | 473.2359  | 2.149 | 0.155 |
| 85 | IPI00030739 | 1 | 54.3 | 0.85 | 0.06 | 29 | 16 | APOM Apolipoprotein M             | CVVEFK                                | 2 | 540.7645  | 2.104 | 0.163 |
| 85 | IPI00030739 | 1 | 54.3 | 0.85 | 0.06 | 29 | 16 | APOM Apolipoprotein M             | SPHPPEK                               | 2 | 536.301   | 1.833 | 0.201 |
| 85 | IPI00030739 | 1 | 54.3 | 0.85 | 0.06 | 29 | 16 | APOM Apolipoprotein M             | n[145]CVVEFK[272]                     | 2 | 544.7716  | 2.065 | 0.183 |
| 85 | IPI00030739 | 1 | 54.3 | 0.85 | 0.06 | 29 | 16 | APOM Apolipoprotein M             | TEGRPDMK                              | 2 | 607.3216  | 1.594 | 0.181 |
| 85 | IPI00030739 | 1 | 54.3 | 0.85 | 0.06 | 29 | 16 | APOM Apolipoprotein M             | FLLYNR                                | 1 | 965.5568  | 2.016 | 0.028 |
| 85 | IPI00030739 | 1 | 54.3 | 0.85 | 0.06 | 29 | 16 | APOM Apolipoprotein M             | n[145]WIYHLEGTSTDLR                   | 3 | 578.9692  | 2.567 | 0.033 |
| 85 | IPI00030739 | 1 | 54.3 | 0.85 | 0.06 | 29 | 16 | APOM Apolipoprotein M             | n[145]TEGRPDMK[272]                   | 2 | 611.3287  | 1.506 | 0.143 |
| 85 | IPI00030739 | 1 | 54.3 | 0.85 | 0.06 | 29 | 16 | APOM Apolipoprotein M             | TEGRPDMK                              | 3 | 405.2168  | 1.696 | 0.035 |
| 86 | IPI00032179 | 1 | 52.3 | 0.77 | 0.08 | 80 | 89 | SERPINC1 Antithrombin III variant | ADGESCSASM[147]M[147]YQEGK            | 2 | 1026.4125 | 5.048 | 0.689 |
| 86 | IPI00032179 | 1 | 52.3 | 0.77 | 0.08 | 80 | 89 | SERPINC1 Antithrombin III variant | DDLIVSDAFHK                           | 2 | 795.4016  | 4.085 | 0.401 |
| 86 | IPI00032179 | 1 | 52.3 | 0.77 | 0.08 | 80 | 89 | SERPINC1 Antithrombin III variant | EQLQDMGLVDFLSPEK                      | 2 | 1065.051  | 4.496 | 0.448 |
| 86 | IPI00032179 | 1 | 52.3 | 0.77 | 0.08 | 80 | 89 | SERPINC1 Antithrombin III variant | EQLQDM[147]GLVDFLSPEK                 | 2 | 1073.0485 | 5.292 | 0.473 |
| 86 | IPI00032179 | 1 | 52.3 | 0.77 | 0.08 | 80 | 89 | SERPINC1 Antithrombin III variant | FATTFYQHLADSK                         | 2 | 904.9702  | 5.586 | 0.442 |
| 86 | IPI00032179 | 1 | 52.3 | 0.77 | 0.08 | 80 | 89 | SERPINC1 Antithrombin III variant | NDNDNIFLSPSISAFAM[147]TK              | 2 | 1298.1598 | 5.61  | 0.604 |
| 86 | IPI00032179 | 1 | 52.3 | 0.77 | 0.08 | 80 | 89 | SERPINC1 Antithrombin III variant | TSDQIHFFFAK                           | 2 | 810.9303  | 4.615 | 0.494 |
| 86 | IPI00032179 | 1 | 52.3 | 0.77 | 0.08 | 80 | 89 | SERPINC1 Antithrombin III variant | VAEGTQVLELPPFK                        | 2 | 855.9931  | 4.639 | 0.522 |
| 86 | IPI00032179 | 1 | 52.3 | 0.77 | 0.08 | 80 | 89 | SERPINC1 Antithrombin III variant | n[145]ADGESCSASM[147]M[147]YQEGK[272] | 2 | 1030.4196 | 3.79  | 0.606 |
| 86 | IPI00032179 | 1 | 52.3 | 0.77 | 0.08 | 80 | 89 | SERPINC1 Antithrombin III variant | n[145]AFLEVNEEGSEAASTAVVIAGR          | 2 | 1218.1304 | 6.161 | 0.519 |
| 86 | IPI00032179 | 1 | 52.3 | 0.77 | 0.08 | 80 | 89 | SERPINC1 Antithrombin III variant | n[145]EQLQDMGLVDFLSPEK[272]           | 2 | 1069.0581 | 4.387 | 0.478 |
| 86 | IPI00032179 | 1 | 52.3 | 0.77 | 0.08 | 80 | 89 | SERPINC1 Antithrombin III variant | n[145]EQLQDM[147]GLVDFLSPEK[272]      | 2 | 1077.0556 | 4.587 | 0.437 |
| 86 | IPI00032179 | 1 | 52.3 | 0.77 | 0.08 | 80 | 89 | SERPINC1 Antithrombin III variant | n[145]FATTFYQHLADSK[272]              | 2 | 908.9773  | 4.136 | 0.498 |
| 86 | IPI00032179 | 1 | 52.3 | 0.77 | 0.08 | 80 | 89 | SERPINC1 Antithrombin III variant | n[145]NDNDNIFLSPSISAFAM[147]TK[272]   | 2 | 1302.1669 | 6.123 | 0.525 |
| 86 | IPI00032179 | 1 | 52.3 | 0.77 | 0.08 | 80 | 89 | SERPINC1 Antithrombin III variant | n[145]TSDQIHFFFAK[272]                | 2 | 814.9374  | 4.303 | 0.452 |
| 86 | IPI00032179 | 1 | 52.3 | 0.77 | 0.08 | 80 | 89 | SERPINC1 Antithrombin III variant | n[145]VAEGTQVLELPPFK[272]             | 2 | 860.0002  | 4.917 | 0.491 |
| 86 | IPI00032179 | 1 | 52.3 | 0.77 | 0.08 | 80 | 89 | SERPINC1 Antithrombin III variant | ADGESCSASM[147]M[147]YQEGK            | 3 | 684.6108  | 3.675 | 0.422 |
| 86 | IPI00032179 | 1 | 52.3 | 0.77 | 0.08 | 80 | 89 | SERPINC1 Antithrombin III variant | DDLIVSDAFHK                           | 3 | 530.6035  | 3.977 | 0.407 |
| 86 | IPI00032179 | 1 | 52.3 | 0.77 | 0.08 | 80 | 89 | SERPINC1 Antithrombin III variant | FATTFYQHLADSK                         | 3 | 603.6492  | 3.653 | 0.463 |
| 86 | IPI00032179 | 1 | 52.3 | 0.77 | 0.08 | 80 | 89 | SERPINC1 Antithrombin III variant | TSDQIHFFFAK                           | 3 | 540.956   | 3.174 | 0.359 |
| 86 | IPI00032179 | 1 | 52.3 | 0.77 | 0.08 | 80 | 89 | SERPINC1 Antithrombin III variant | n[145]DDLIVSDAFHK[272]                | 3 | 533.2749  | 3.125 | 0.302 |
| 86 | IPI00032179 | 1 | 52.3 | 0.77 | 0.08 | 80 | 89 | SERPINC1 Antithrombin III variant | n[145]FATTFYQHLADSK[272]              | 3 | 606.3206  | 4.512 | 0.378 |

|    |             |   |      |      |      |    |    |                                   |                                        |   |           |       |       |
|----|-------------|---|------|------|------|----|----|-----------------------------------|----------------------------------------|---|-----------|-------|-------|
| 86 | IPi00032179 | 1 | 52.3 | 0.77 | 0.08 | 80 | 89 | SERPINC1 Antithrombin III variant | n[145]FRIEDGFSLK[272]                  | 3 | 500.6202  | 4.566 | 0.38  |
| 86 | IPi00032179 | 1 | 52.3 | 0.77 | 0.08 | 80 | 89 | SERPINC1 Antithrombin III variant | n[145]LPGIVAEGRDDLYVSDAFHK[272]        | 4 | 623.3363  | 4.673 | 0.422 |
| 86 | IPi00032179 | 1 | 52.3 | 0.77 | 0.08 | 80 | 89 | SERPINC1 Antithrombin III variant | n[145]SK[272]LPGIVAEGRDDLYVSDAFHK[272] | 4 | 713.1435  | 2.854 | 0.028 |
| 86 | IPi00032179 | 1 | 52.3 | 0.77 | 0.08 | 80 | 89 | SERPINC1 Antithrombin III variant | n[145]SK[272]LPGIVAEGRDDLYVSDAFHK[272] | 5 | 570.7163  | 3.9   | 0.385 |
| 86 | IPi00032179 | 1 | 52.3 | 0.77 | 0.08 | 80 | 89 | SERPINC1 Antithrombin III variant | GDDITM[147]VLILPKPEK                   | 3 | 702.4062  | 2.975 | 0.345 |
| 86 | IPi00032179 | 1 | 52.3 | 0.77 | 0.08 | 80 | 89 | SERPINC1 Antithrombin III variant | KATEDEGSEQK                            | 3 | 547.953   | 3.234 | 0.319 |
| 86 | IPi00032179 | 1 | 52.3 | 0.77 | 0.08 | 80 | 89 | SERPINC1 Antithrombin III variant | SKLPGIVAEGR                            | 3 | 469.6208  | 3.94  | 0.374 |
| 86 | IPi00032179 | 1 | 52.3 | 0.77 | 0.08 | 80 | 89 | SERPINC1 Antithrombin III variant | n[145]NDNDNIFLSPLSISTAFAM[147]TK[272]  | 3 | 868.447   | 2.584 | 0.132 |
| 86 | IPi00032179 | 1 | 52.3 | 0.77 | 0.08 | 80 | 89 | SERPINC1 Antithrombin III variant | n[145]SK[272]LPGIVAEGR                 | 3 | 472.2922  | 4.034 | 0.317 |
| 86 | IPi00032179 | 1 | 52.3 | 0.77 | 0.08 | 80 | 89 | SERPINC1 Antithrombin III variant | n[145]TSDQIHFFFAK[272]                 | 3 | 543.6274  | 2.621 | 0.225 |
| 86 | IPi00032179 | 1 | 52.3 | 0.77 | 0.08 | 80 | 89 | SERPINC1 Antithrombin III variant | n[145]DDLYVSDAFHK[272]                 | 2 | 799.4087  | 3.921 | 0.377 |
| 86 | IPi00032179 | 1 | 52.3 | 0.77 | 0.08 | 80 | 89 | SERPINC1 Antithrombin III variant | n[145]EVPLNTIIFMGR                     | 2 | 767.4326  | 2.112 | 0.039 |
| 86 | IPi00032179 | 1 | 52.3 | 0.77 | 0.08 | 80 | 89 | SERPINC1 Antithrombin III variant | FRIEDGFSLK                             | 3 | 497.9488  | 3.969 | 0.202 |
| 86 | IPi00032179 | 1 | 52.3 | 0.77 | 0.08 | 80 | 89 | SERPINC1 Antithrombin III variant | EVPLNTIIFMGR                           | 2 | 765.4291  | 3.288 | 0.34  |
| 86 | IPi00032179 | 1 | 52.3 | 0.77 | 0.08 | 80 | 89 | SERPINC1 Antithrombin III variant | n[145]EVPLNTIIFM[147]GR                | 2 | 775.4301  | 2.835 | 0.306 |
| 86 | IPi00032179 | 1 | 52.3 | 0.77 | 0.08 | 80 | 89 | SERPINC1 Antithrombin III variant | n[145]SK[272]FSPENTRK[272]             | 3 | 542.6494  | 2.838 | 0.308 |
| 86 | IPi00032179 | 1 | 52.3 | 0.77 | 0.08 | 80 | 89 | SERPINC1 Antithrombin III variant | GDDITMVLILPKPEK                        | 3 | 697.0745  | 3.069 | 0.282 |
| 86 | IPi00032179 | 1 | 52.3 | 0.77 | 0.08 | 80 | 89 | SERPINC1 Antithrombin III variant | n[145]GDDITM[147]VLILPK[272]PEK[272]   | 3 | 706.4133  | 2.642 | 0.28  |
| 86 | IPi00032179 | 1 | 52.3 | 0.77 | 0.08 | 80 | 89 | SERPINC1 Antithrombin III variant | ATEDEGSEQK                             | 2 | 687.3308  | 2.896 | 0.377 |
| 86 | IPi00032179 | 1 | 52.3 | 0.77 | 0.08 | 80 | 89 | SERPINC1 Antithrombin III variant | n[145]DIPMNPMSIYR                      | 2 | 771.8565  | 3.245 | 0.246 |
| 86 | IPi00032179 | 1 | 52.3 | 0.77 | 0.08 | 80 | 89 | SERPINC1 Antithrombin III variant | n[145]GDDITMVLILPK[272]PEK[272]        | 2 | 1051.1188 | 4.079 | 0.333 |
| 86 | IPi00032179 | 1 | 52.3 | 0.77 | 0.08 | 80 | 89 | SERPINC1 Antithrombin III variant | n[145]GDDITMVLILPK[272]PEK[272]        | 3 | 701.0816  | 2.82  | 0.231 |
| 86 | IPi00032179 | 1 | 52.3 | 0.77 | 0.08 | 80 | 89 | SERPINC1 Antithrombin III variant | n[145]IEDGFSLK[272]                    | 1 | 1196.6766 | 2.55  | 0.155 |
| 86 | IPi00032179 | 1 | 52.3 | 0.77 | 0.08 | 80 | 89 | SERPINC1 Antithrombin III variant | n[145]LQPLDFK[272]                     | 2 | 574.8496  | 2.385 | 0.263 |
| 86 | IPi00032179 | 1 | 52.3 | 0.77 | 0.08 | 80 | 89 | SERPINC1 Antithrombin III variant | IEDGFSLK                               | 1 | 1188.6624 | 2.533 | 0.124 |
| 86 | IPi00032179 | 1 | 52.3 | 0.77 | 0.08 | 80 | 89 | SERPINC1 Antithrombin III variant | n[145]ELFYK[272]                       | 2 | 494.2913  | 2.138 | 0.245 |
| 86 | IPi00032179 | 1 | 52.3 | 0.77 | 0.08 | 80 | 89 | SERPINC1 Antithrombin III variant | n[145]DIPM[147]NPM[147]CIYR            | 2 | 787.8514  | 1.997 | 0.196 |
| 86 | IPi00032179 | 1 | 52.3 | 0.77 | 0.08 | 80 | 89 | SERPINC1 Antithrombin III variant | LQPLDFKENAEQSR                         | 3 | 652.3497  | 2.527 | 0.296 |
| 86 | IPi00032179 | 1 | 52.3 | 0.77 | 0.08 | 80 | 89 | SERPINC1 Antithrombin III variant | KELFYK                                 | 2 | 624.3792  | 2.463 | 0.157 |
| 86 | IPi00032179 | 1 | 52.3 | 0.77 | 0.08 | 80 | 89 | SERPINC1 Antithrombin III variant | LQPLDFK                                | 2 | 570.8425  | 1.888 | 0.001 |
| 86 | IPi00032179 | 1 | 52.3 | 0.77 | 0.08 | 80 | 89 | SERPINC1 Antithrombin III variant | n[145]ATEDEGSEQK[272]                  | 2 | 691.3379  | 2.563 | 0.266 |
| 86 | IPi00032179 | 1 | 52.3 | 0.77 | 0.08 | 80 | 89 | SERPINC1 Antithrombin III variant | n[145]DIPMNPMSIYR                      | 2 | 779.854   | 3.33  | 0.249 |
| 86 | IPi00032179 | 1 | 52.3 | 0.77 | 0.08 | 80 | 89 | SERPINC1 Antithrombin III variant | n[145]FSPENTR                          | 2 | 497.7574  | 2.225 | 0.202 |
| 86 | IPi00032179 | 1 | 52.3 | 0.77 | 0.08 | 80 | 89 | SERPINC1 Antithrombin III variant | n[145]LQPLDFK[272]ENAEQSR              | 3 | 655.0211  | 2.483 | 0.275 |
| 86 | IPi00032179 | 1 | 52.3 | 0.77 | 0.08 | 80 | 89 | SERPINC1 Antithrombin III variant | IEDGFSLK                               | 2 | 594.8348  | 2.38  | 0.214 |
| 86 | IPi00032179 | 1 | 52.3 | 0.77 | 0.08 | 80 | 89 | SERPINC1 Antithrombin III variant | SKLPGIVAEGR                            | 2 | 703.9276  | 3.29  | 0.386 |
| 86 | IPi00032179 | 1 | 52.3 | 0.77 | 0.08 | 80 | 89 | SERPINC1 Antithrombin III variant | ELFYK                                  | 2 | 490.2842  | 2.057 | 0.22  |
| 86 | IPi00032179 | 1 | 52.3 | 0.77 | 0.08 | 80 | 89 | SERPINC1 Antithrombin III variant | n[145]LQPLDFK[272]ENAEQSR              | 2 | 982.028   | 3.013 | 0.439 |
| 86 | IPi00032179 | 1 | 52.3 | 0.77 | 0.08 | 80 | 89 | SERPINC1 Antithrombin III variant | n[145]LPGIVAEGR                        | 2 | 528.3201  | 1.918 | 0.164 |
| 86 | IPi00032179 | 1 | 52.3 | 0.77 | 0.08 | 80 | 89 | SERPINC1 Antithrombin III variant | EVPLNTIIFM[147]GR                      | 2 | 773.4265  | 2.727 | 0.081 |
| 86 | IPi00032179 | 1 | 52.3 | 0.77 | 0.08 | 80 | 89 | SERPINC1 Antithrombin III variant | n[145]SK[272]LPGIVAEGRDDLYVSDAFHK[272] | 3 | 950.5223  | 3.35  | 0.234 |
| 86 | IPi00032179 | 1 | 52.3 | 0.77 | 0.08 | 80 | 89 | SERPINC1 Antithrombin III variant | n[145]SK[272]LPGIVAEGR                 | 2 | 707.9347  | 3.002 | 0.327 |
| 86 | IPi00032179 | 1 | 52.3 | 0.77 | 0.08 | 80 | 89 | SERPINC1 Antithrombin III variant | FDTISEK                                | 2 | 560.3059  | 2.545 | 0.082 |
| 86 | IPi00032179 | 1 | 52.3 | 0.77 | 0.08 | 80 | 89 | SERPINC1 Antithrombin III variant | n[145]IEDGFSLK[272]                    | 2 | 598.8419  | 1.879 | 0.247 |
| 86 | IPi00032179 | 1 | 52.3 | 0.77 | 0.08 | 80 | 89 | SERPINC1 Antithrombin III variant | n[145]EVPLNTIIFM[147]GR                | 3 | 517.2891  | 3.049 | 0.102 |
| 86 | IPi00032179 | 1 | 52.3 | 0.77 | 0.08 | 80 | 89 | SERPINC1 Antithrombin III variant | LQPLDFKENAEQSR                         | 2 | 978.0209  | 2.322 | 0.408 |
| 86 | IPi00032179 | 1 | 52.3 | 0.77 | 0.08 | 80 | 89 | SERPINC1 Antithrombin III variant | n[145]VANPCVK[272]                     | 2 | 532.7954  | 1.904 | 0.15  |
| 86 | IPi00032179 | 1 | 52.3 | 0.77 | 0.08 | 80 | 89 | SERPINC1 Antithrombin III variant | n[145]DIPM[147]NPMCIYR                 | 2 | 779.854   | 2.327 | 0.297 |

|    |             |   |      |      |      |    |    |                                   |                            |   |           |       |       |
|----|-------------|---|------|------|------|----|----|-----------------------------------|----------------------------|---|-----------|-------|-------|
| 86 | IPI00032179 | 1 | 52.3 | 0.77 | 0.08 | 80 | 89 | SERPINC1 Antithrombin III variant | DIPM[147]NPMCIYR           | 2 | 777.8504  | 2.326 | 0.363 |
| 86 | IPI00032179 | 1 | 52.3 | 0.77 | 0.08 | 80 | 89 | SERPINC1 Antithrombin III variant | n[145]FRIEDGFSLK[272]      | 2 | 750.4267  | 3.163 | 0.217 |
| 86 | IPI00032179 | 1 | 52.3 | 0.77 | 0.08 | 80 | 89 | SERPINC1 Antithrombin III variant | FSPENTR                    | 2 | 495.7538  | 1.747 | 0.143 |
| 86 | IPI00032179 | 1 | 52.3 | 0.77 | 0.08 | 80 | 89 | SERPINC1 Antithrombin III variant | KELFYK                     | 3 | 416.5886  | 1.95  | 0.064 |
| 86 | IPI00032179 | 1 | 52.3 | 0.77 | 0.08 | 80 | 89 | SERPINC1 Antithrombin III variant | n[145]FATTFYQH             | 2 | 579.7887  | 3.023 | 0.328 |
| 86 | IPI00032179 | 1 | 52.3 | 0.77 | 0.08 | 80 | 89 | SERPINC1 Antithrombin III variant | n[145]VWELSK[272]          | 2 | 525.3153  | 1.647 | 0.042 |
| 86 | IPI00032179 | 1 | 52.3 | 0.77 | 0.08 | 80 | 89 | SERPINC1 Antithrombin III variant | SKLPGIVAEGRDDLYVSDAFHK     | 4 | 710.1382  | 2.704 | 0.136 |
| 86 | IPI00032179 | 1 | 52.3 | 0.77 | 0.08 | 80 | 89 | SERPINC1 Antithrombin III variant | n[145]TSDQIHFFF            | 2 | 643.3203  | 2.113 | 0.38  |
| 86 | IPI00032179 | 1 | 52.3 | 0.77 | 0.08 | 80 | 89 | SERPINC1 Antithrombin III variant | n[145]TSDQIHFFFA           | 2 | 678.8389  | 2.73  | 0.412 |
| 86 | IPI00032179 | 1 | 52.3 | 0.77 | 0.08 | 80 | 89 | SERPINC1 Antithrombin III variant | n[145]SK[272]FSPENTR       | 3 | 451.917   | 1.967 | 0.112 |
| 86 | IPI00032179 | 1 | 52.3 | 0.77 | 0.08 | 80 | 89 | SERPINC1 Antithrombin III variant | KATEDEGSEQK                | 2 | 821.4258  | 1.385 | 0.211 |
| 86 | IPI00032179 | 1 | 52.3 | 0.77 | 0.08 | 80 | 89 | SERPINC1 Antithrombin III variant | n[145]YQHLADSK[272]        | 2 | 625.3426  | 2.422 | 0.254 |
| 86 | IPI00032179 | 1 | 52.3 | 0.77 | 0.08 | 80 | 89 | SERPINC1 Antithrombin III variant | n[145]SK[272]FSPENTRK[272] | 4 | 407.2389  | 1.835 | 0.001 |
| 86 | IPI00032179 | 1 | 52.3 | 0.77 | 0.08 | 80 | 89 | SERPINC1 Antithrombin III variant | n[145]EVPLNTIIFMGR         | 3 | 511.9575  | 1.933 | 0.035 |
| 86 | IPI00032179 | 1 | 52.3 | 0.77 | 0.08 | 80 | 89 | SERPINC1 Antithrombin III variant | n[145]YQHLADSK[272]        | 3 | 417.2308  | 2.906 | 0.067 |
| 86 | IPI00032179 | 1 | 52.3 | 0.77 | 0.08 | 80 | 89 | SERPINC1 Antithrombin III variant | ATTFYQHLADSK               | 3 | 554.6264  | 2.574 | 0.145 |
| 86 | IPI00032179 | 1 | 52.3 | 0.77 | 0.08 | 80 | 89 | SERPINC1 Antithrombin III variant | n[145]LYVSDAFHK[272]       | 3 | 456.5902  | 2.185 | 0.148 |
| 86 | IPI00032179 | 1 | 52.3 | 0.77 | 0.08 | 80 | 89 | SERPINC1 Antithrombin III variant | YQHLADSK                   | 2 | 621.3355  | 1.942 | 0.138 |
| 86 | IPI00032179 | 1 | 52.3 | 0.77 | 0.08 | 80 | 89 | SERPINC1 Antithrombin III variant | n[145]ATTFYQHLADSK[272]    | 3 | 557.2978  | 2.985 | 0.043 |
| 86 | IPI00032179 | 1 | 52.3 | 0.77 | 0.08 | 80 | 89 | SERPINC1 Antithrombin III variant | NDNDNIFLSPLSISTAFAM[147]TK | 3 | 865.7756  | 1.6   | 0.062 |
| 87 | IPI00032220 | 1 | 24.1 | 0.89 | 0.06 | 53 | 29 | AGT Angiotensinogen precursor     | ALQDQLVLAOK                | 2 | 774.9773  | 4.754 | 0.463 |
| 87 | IPI00032220 | 1 | 24.1 | 0.89 | 0.06 | 53 | 29 | AGT Angiotensinogen precursor     | QPFVQGLALYTPVVLPR          | 2 | 1019.5961 | 5.403 | 0.576 |
| 87 | IPI00032220 | 1 | 24.1 | 0.89 | 0.06 | 53 | 29 | AGT Angiotensinogen precursor     | SLDFTELDVAEK               | 2 | 859.454   | 4.49  | 0.461 |
| 87 | IPI00032220 | 1 | 24.1 | 0.89 | 0.06 | 53 | 29 | AGT Angiotensinogen precursor     | VQGLALYTPVVLPR             | 2 | 833.5062  | 3.779 | 0.521 |
| 87 | IPI00032220 | 1 | 24.1 | 0.89 | 0.06 | 53 | 29 | AGT Angiotensinogen precursor     | n[145]ALQDQLVLAOK[272]     | 2 | 778.9844  | 4.453 | 0.369 |
| 87 | IPI00032220 | 1 | 24.1 | 0.89 | 0.06 | 53 | 29 | AGT Angiotensinogen precursor     | n[145]DPTFIPAPIQAK[272]    | 2 | 793.4633  | 3.234 | 0.307 |
| 87 | IPI00032220 | 1 | 24.1 | 0.89 | 0.06 | 53 | 29 | AGT Angiotensinogen precursor     | n[145]FVQGLALYTPVVLPR      | 2 | 909.0439  | 4.119 | 0.469 |
| 87 | IPI00032220 | 1 | 24.1 | 0.89 | 0.06 | 53 | 29 | AGT Angiotensinogen precursor     | n[145]SLDFTELDVAEK[272]    | 2 | 863.4611  | 4.457 | 0.393 |
| 87 | IPI00032220 | 1 | 24.1 | 0.89 | 0.06 | 53 | 29 | AGT Angiotensinogen precursor     | AVYDQSATALHFLGR            | 3 | 596.9846  | 4.672 | 0.414 |
| 87 | IPI00032220 | 1 | 24.1 | 0.89 | 0.06 | 53 | 29 | AGT Angiotensinogen precursor     | QPFVQGLALYTPVVLPR          | 3 | 680.0665  | 3.196 | 0.22  |
| 87 | IPI00032220 | 1 | 24.1 | 0.89 | 0.06 | 53 | 29 | AGT Angiotensinogen precursor     | n[145]AVYDQSATALHFLGR      | 3 | 598.3203  | 4.941 | 0.518 |
| 87 | IPI00032220 | 1 | 24.1 | 0.89 | 0.06 | 53 | 29 | AGT Angiotensinogen precursor     | n[145]LFVAVYDQSATALHFLGR   | 3 | 685.0378  | 5.518 | 0.464 |
| 87 | IPI00032220 | 1 | 24.1 | 0.89 | 0.06 | 53 | 29 | AGT Angiotensinogen precursor     | n[145]QPFVQGLALYTPVVLPR    | 3 | 681.4022  | 4     | 0.344 |
| 87 | IPI00032220 | 1 | 24.1 | 0.89 | 0.06 | 53 | 29 | AGT Angiotensinogen precursor     | DPTFIPAPIQAK               | 2 | 789.4562  | 2.597 | 0.387 |
| 87 | IPI00032220 | 1 | 24.1 | 0.89 | 0.06 | 53 | 29 | AGT Angiotensinogen precursor     | ALQDQLVLAOK                | 3 | 516.9873  | 2.242 | 0.256 |
| 87 | IPI00032220 | 1 | 24.1 | 0.89 | 0.06 | 53 | 29 | AGT Angiotensinogen precursor     | n[145]LDTEDK[272]LR        | 3 | 426.5816  | 2.457 | 0.263 |
| 87 | IPI00032220 | 1 | 24.1 | 0.89 | 0.06 | 53 | 29 | AGT Angiotensinogen precursor     | n[145]QPFVQGLALYTPVVLPR    | 2 | 1021.5996 | 3.823 | 0.404 |
| 87 | IPI00032220 | 1 | 24.1 | 0.89 | 0.06 | 53 | 29 | AGT Angiotensinogen precursor     | LDTEDKLR                   | 3 | 423.9102  | 2.691 | 0.215 |
| 87 | IPI00032220 | 1 | 24.1 | 0.89 | 0.06 | 53 | 29 | AGT Angiotensinogen precursor     | LDTEDK                     | 2 | 500.7692  | 2.069 | 0.116 |
| 87 | IPI00032220 | 1 | 24.1 | 0.89 | 0.06 | 53 | 29 | AGT Angiotensinogen precursor     | VANPLSTA                   | 1 | 912.515   | 1.727 | 0.121 |
| 87 | IPI00032220 | 1 | 24.1 | 0.89 | 0.06 | 53 | 29 | AGT Angiotensinogen precursor     | n[145]LDTEDK[272]          | 2 | 504.7763  | 2.325 | 0.041 |
| 87 | IPI00032220 | 1 | 24.1 | 0.89 | 0.06 | 53 | 29 | AGT Angiotensinogen precursor     | n[145]VANPLSTA             | 1 | 916.5221  | 1.397 | 0.211 |
| 87 | IPI00032220 | 1 | 24.1 | 0.89 | 0.06 | 53 | 29 | AGT Angiotensinogen precursor     | n[145]LDTEDK[272]LR        | 2 | 639.3688  | 2.137 | 0.233 |
| 87 | IPI00032220 | 1 | 24.1 | 0.89 | 0.06 | 53 | 29 | AGT Angiotensinogen precursor     | n[145]ALYTPVVLPR           | 2 | 636.8935  | 2.897 | 0.311 |
| 87 | IPI00032220 | 1 | 24.1 | 0.89 | 0.06 | 53 | 29 | AGT Angiotensinogen precursor     | n[145]ALQDQLVLAOK[272]     | 3 | 519.6587  | 1.922 | 0.141 |
| 87 | IPI00032220 | 1 | 24.1 | 0.89 | 0.06 | 53 | 29 | AGT Angiotensinogen precursor     | ALYTPVVLPR                 | 2 | 634.8899  | 3.035 | 0.319 |
| 87 | IPI00032220 | 1 | 24.1 | 0.89 | 0.06 | 53 | 29 | AGT Angiotensinogen precursor     | LQAILGVPWK[272]            | 2 | 704.9435  | 2.652 | 0.27  |
| 87 | IPI00032220 | 1 | 24.1 | 0.89 | 0.06 | 53 | 29 | AGT Angiotensinogen precursor     | TSPVDEK                    | 2 | 528.2902  | 1.463 | 0.014 |



|    |             |   |      |      |      |     |    |                               |                                   |   |           |       |       |
|----|-------------|---|------|------|------|-----|----|-------------------------------|-----------------------------------|---|-----------|-------|-------|
| 87 | IPI00032220 | 1 | 24.1 | 0.89 | 0.06 | 53  | 29 | AGT Angiotensinogen precursor | YTPVVLP                           | 2 | 542.8293  | 2.04  | 0.212 |
| 87 | IPI00032220 | 1 | 24.1 | 0.89 | 0.06 | 53  | 29 | AGT Angiotensinogen precursor | YASDLDK                           | 2 | 546.2902  | 1.912 | 0.083 |
| 87 | IPI00032220 | 1 | 24.1 | 0.89 | 0.06 | 53  | 29 | AGT Angiotensinogen precursor | VYIHPF                            | 2 | 458.258   | 1.307 | 0.197 |
| 87 | IPI00032220 | 1 | 24.1 | 0.89 | 0.06 | 53  | 29 | AGT Angiotensinogen precursor | n[145]YASDLDK[272]                | 2 | 550.2973  | 1.745 | 0.102 |
| 88 | IPI00032291 | 1 | 33.1 | 0.71 | 0.07 | 151 | 98 | C5 Complement C5 precursor    | ALVEGVDQLFTDYQIK                  | 2 | 1060.0754 | 5.533 | 0.543 |
| 88 | IPI00032291 | 1 | 33.1 | 0.71 | 0.07 | 151 | 98 | C5 Complement C5 precursor    | DINYVNPVIK                        | 2 | 727.922   | 4.324 | 0.374 |
| 88 | IPI00032291 | 1 | 33.1 | 0.71 | 0.07 | 151 | 98 | C5 Complement C5 precursor    | FSYSSGHVHLSENK                    | 2 | 979.9896  | 5.173 | 0.507 |
| 88 | IPI00032291 | 1 | 33.1 | 0.71 | 0.07 | 151 | 98 | C5 Complement C5 precursor    | VSITSITVENVFK                     | 2 | 908.5326  | 5.053 | 0.481 |
| 88 | IPI00032291 | 1 | 33.1 | 0.71 | 0.07 | 151 | 98 | C5 Complement C5 precursor    | n[145]AFTECCVVASQLR               | 2 | 831.8833  | 3.708 | 0.459 |
| 88 | IPI00032291 | 1 | 33.1 | 0.71 | 0.07 | 151 | 98 | C5 Complement C5 precursor    | n[145]ALVEGVDQLFTDYQIK[272]       | 2 | 1064.0825 | 3.892 | 0.488 |
| 88 | IPI00032291 | 1 | 33.1 | 0.71 | 0.07 | 151 | 98 | C5 Complement C5 precursor    | n[145]FSYSSGHVHLSENK[272]         | 2 | 983.9967  | 5.712 | 0.522 |
| 88 | IPI00032291 | 1 | 33.1 | 0.71 | 0.07 | 151 | 98 | C5 Complement C5 precursor    | n[145]VSITSITVENVFK[272]          | 2 | 912.5397  | 5.258 | 0.542 |
| 88 | IPI00032291 | 1 | 33.1 | 0.71 | 0.07 | 151 | 98 | C5 Complement C5 precursor    | ALLVGEHLNIIVTPK                   | 3 | 633.0593  | 3.667 | 0.379 |
| 88 | IPI00032291 | 1 | 33.1 | 0.71 | 0.07 | 151 | 98 | C5 Complement C5 precursor    | EESSGSSHAVM[147]DISLPTGISANEEDLK  | 3 | 1062.8418 | 4.756 | 0.428 |
| 88 | IPI00032291 | 1 | 33.1 | 0.71 | 0.07 | 151 | 98 | C5 Complement C5 precursor    | FSYSSGHVHLSENK                    | 3 | 653.6622  | 3.98  | 0.416 |
| 88 | IPI00032291 | 1 | 33.1 | 0.71 | 0.07 | 151 | 98 | C5 Complement C5 precursor    | KAFDICPLVK                        | 3 | 533.9753  | 2.95  | 0.31  |
| 88 | IPI00032291 | 1 | 33.1 | 0.71 | 0.07 | 151 | 98 | C5 Complement C5 precursor    | n[145]FSDASYQSINIPVTQNM[147]VPSSR | 3 | 867.7627  | 4.376 | 0.401 |
| 88 | IPI00032291 | 1 | 33.1 | 0.71 | 0.07 | 151 | 98 | C5 Complement C5 precursor    | n[145]FSYSSGHVHLSENK[272]         | 3 | 656.3336  | 4.426 | 0.399 |
| 88 | IPI00032291 | 1 | 33.1 | 0.71 | 0.07 | 151 | 98 | C5 Complement C5 precursor    | n[145]TGEVAEAK[272]DSEITFIK[272]  | 3 | 724.0704  | 5.172 | 0.437 |
| 88 | IPI00032291 | 1 | 33.1 | 0.71 | 0.07 | 151 | 98 | C5 Complement C5 precursor    | n[145]FSYSSGHVHLSENK[272]         | 4 | 492.502   | 4.388 | 0.446 |
| 88 | IPI00032291 | 1 | 33.1 | 0.71 | 0.07 | 151 | 98 | C5 Complement C5 precursor    | IVACASYKPSR                       | 3 | 507.6074  | 2.805 | 0.172 |
| 88 | IPI00032291 | 1 | 33.1 | 0.71 | 0.07 | 151 | 98 | C5 Complement C5 precursor    | TGEVAEAKDSEITFIK                  | 3 | 720.0633  | 4.387 | 0.382 |
| 88 | IPI00032291 | 1 | 33.1 | 0.71 | 0.07 | 151 | 98 | C5 Complement C5 precursor    | VSITSITVENVFK                     | 3 | 606.0242  | 3.254 | 0.293 |
| 88 | IPI00032291 | 1 | 33.1 | 0.71 | 0.07 | 151 | 98 | C5 Complement C5 precursor    | n[145]ALLVGEHLNIIVTPK[272]        | 3 | 635.7307  | 3.613 | 0.404 |
| 88 | IPI00032291 | 1 | 33.1 | 0.71 | 0.07 | 151 | 98 | C5 Complement C5 precursor    | n[145]IDTQDIEASHYR                | 3 | 531.2659  | 3.668 | 0.261 |
| 88 | IPI00032291 | 1 | 33.1 | 0.71 | 0.07 | 151 | 98 | C5 Complement C5 precursor    | n[145]IVACASYK[272]PSR            | 3 | 510.2788  | 3.3   | 0.322 |
| 88 | IPI00032291 | 1 | 33.1 | 0.71 | 0.07 | 151 | 98 | C5 Complement C5 precursor    | n[145]VSITSITVENVFK[272]          | 3 | 608.6956  | 3.251 | 0.324 |
| 88 | IPI00032291 | 1 | 33.1 | 0.71 | 0.07 | 151 | 98 | C5 Complement C5 precursor    | MPITYDNGFLFIHTDKPVYTPDQSVK        | 4 | 862.4509  | 3.582 | 0.298 |
| 88 | IPI00032291 | 1 | 33.1 | 0.71 | 0.07 | 151 | 98 | C5 Complement C5 precursor    | M[147]PITYDNGFLFIHTDKPVYTPDQSVK   | 4 | 866.4497  | 4.336 | 0.382 |
| 88 | IPI00032291 | 1 | 33.1 | 0.71 | 0.07 | 151 | 98 | C5 Complement C5 precursor    | KAFDICPLVK                        | 2 | 800.4594  | 3.411 | 0.352 |
| 88 | IPI00032291 | 1 | 33.1 | 0.71 | 0.07 | 151 | 98 | C5 Complement C5 precursor    | n[145]DINYVNPVIK[272]             | 2 | 731.9291  | 3.688 | 0.345 |
| 88 | IPI00032291 | 1 | 33.1 | 0.71 | 0.07 | 151 | 98 | C5 Complement C5 precursor    | n[145]FQNSAILTIQPK[272]           | 2 | 824.4873  | 3.566 | 0.367 |
| 88 | IPI00032291 | 1 | 33.1 | 0.71 | 0.07 | 151 | 98 | C5 Complement C5 precursor    | n[145]IVACASYK[272]PSR            | 2 | 764.9146  | 3.574 | 0.365 |
| 88 | IPI00032291 | 1 | 33.1 | 0.71 | 0.07 | 151 | 98 | C5 Complement C5 precursor    | n[145]TDAPDLPEENQAR               | 2 | 800.3902  | 3.74  | 0.229 |
| 88 | IPI00032291 | 1 | 33.1 | 0.71 | 0.07 | 151 | 98 | C5 Complement C5 precursor    | KVTCTNAELVK                       | 3 | 557.981   | 3.181 | 0.224 |
| 88 | IPI00032291 | 1 | 33.1 | 0.71 | 0.07 | 151 | 98 | C5 Complement C5 precursor    | n[145]QLPGGQNPVSYVYLEVSK[272]     | 3 | 789.1051  | 3.245 | 0.17  |
| 88 | IPI00032291 | 1 | 33.1 | 0.71 | 0.07 | 151 | 98 | C5 Complement C5 precursor    | n[145]VYSLNDDLK[272]PAK[272]R     | 4 | 488.5389  | 2.033 | 0.253 |
| 88 | IPI00032291 | 1 | 33.1 | 0.71 | 0.07 | 151 | 98 | C5 Complement C5 precursor    | n[145]ATLLDIYK[272]               | 2 | 612.8758  | 1.346 | 0.147 |
| 88 | IPI00032291 | 1 | 33.1 | 0.71 | 0.07 | 151 | 98 | C5 Complement C5 precursor    | n[145]DINYVNPVIK[272]             | 3 | 488.2885  | 3.227 | 0.203 |
| 88 | IPI00032291 | 1 | 33.1 | 0.71 | 0.07 | 151 | 98 | C5 Complement C5 precursor    | AFDICPLVK                         | 2 | 666.3644  | 3.211 | 0.211 |
| 88 | IPI00032291 | 1 | 33.1 | 0.71 | 0.07 | 151 | 98 | C5 Complement C5 precursor    | n[145]AFDICPLVK[272]              | 2 | 670.3715  | 3.407 | 0.201 |
| 88 | IPI00032291 | 1 | 33.1 | 0.71 | 0.07 | 151 | 98 | C5 Complement C5 precursor    | n[145]DSEITFIK[272]               | 2 | 620.855   | 3.192 | 0.288 |
| 88 | IPI00032291 | 1 | 33.1 | 0.71 | 0.07 | 151 | 98 | C5 Complement C5 precursor    | n[145]JENSQYQPIK[272]             | 2 | 697.8796  | 3.238 | 0.281 |
| 88 | IPI00032291 | 1 | 33.1 | 0.71 | 0.07 | 151 | 98 | C5 Complement C5 precursor    | n[145]FLK[272]PGIPYPIK[272]       | 3 | 569.0308  | 3.114 | 0.394 |
| 88 | IPI00032291 | 1 | 33.1 | 0.71 | 0.07 | 151 | 98 | C5 Complement C5 precursor    | n[145]YK[272]HSVVK[272]K[272]     | 3 | 522.3389  | 2.756 | 0.286 |
| 88 | IPI00032291 | 1 | 33.1 | 0.71 | 0.07 | 151 | 98 | C5 Complement C5 precursor    | KIEEIAAK                          | 2 | 661.4138  | 2.958 | 0.288 |
| 88 | IPI00032291 | 1 | 33.1 | 0.71 | 0.07 | 151 | 98 | C5 Complement C5 precursor    | ITHYNYLILSK                       | 2 | 822.9773  | 4.871 | 0.311 |
| 88 | IPI00032291 | 1 | 33.1 | 0.71 | 0.07 | 151 | 98 | C5 Complement C5 precursor    | VCEGAACK                          | 2 | 576.7553  | 2.523 | 0.295 |

|    |             |   |      |      |      |     |    |                            |                                   |   |          |       |       |
|----|-------------|---|------|------|------|-----|----|----------------------------|-----------------------------------|---|----------|-------|-------|
| 88 | IPI00032291 | 1 | 33.1 | 0.71 | 0.07 | 151 | 98 | C5 Complement C5 precursor | n[145]GTVVNYR                     | 2 | 508.7677 | 2.892 | 0.224 |
| 88 | IPI00032291 | 1 | 33.1 | 0.71 | 0.07 | 151 | 98 | C5 Complement C5 precursor | GTVVNYR                           | 2 | 506.7642 | 2.475 | 0.266 |
| 88 | IPI00032291 | 1 | 33.1 | 0.71 | 0.07 | 151 | 98 | C5 Complement C5 precursor | n[145]GYGNSDYK[272]               | 2 | 596.2979 | 2.078 | 0.079 |
| 88 | IPI00032291 | 1 | 33.1 | 0.71 | 0.07 | 151 | 98 | C5 Complement C5 precursor | ATLLDIYK                          | 2 | 608.8687 | 2.784 | 0.179 |
| 88 | IPI00032291 | 1 | 33.1 | 0.71 | 0.07 | 151 | 98 | C5 Complement C5 precursor | GEQIQLK                           | 2 | 548.3297 | 2.459 | 0.174 |
| 88 | IPI00032291 | 1 | 33.1 | 0.71 | 0.07 | 151 | 98 | C5 Complement C5 precursor | n[145]GIYGTISR                    | 2 | 505.7912 | 2.832 | 0.182 |
| 88 | IPI00032291 | 1 | 33.1 | 0.71 | 0.07 | 151 | 98 | C5 Complement C5 precursor | n[145]EGM[147]LSIM[147]SYR        | 2 | 681.8293 | 2.255 | 0.313 |
| 88 | IPI00032291 | 1 | 33.1 | 0.71 | 0.07 | 151 | 98 | C5 Complement C5 precursor | n[145]YNFSFR                      | 2 | 489.2517 | 2.389 | 0.207 |
| 88 | IPI00032291 | 1 | 33.1 | 0.71 | 0.07 | 151 | 98 | C5 Complement C5 precursor | n[145]GEQIQLK[272]                | 2 | 552.3368 | 2.358 | 0.08  |
| 88 | IPI00032291 | 1 | 33.1 | 0.71 | 0.07 | 151 | 98 | C5 Complement C5 precursor | n[145]LK[272]EGM[147]LSIM[147]SYR | 3 | 583.3157 | 3.09  | 0.236 |
| 88 | IPI00032291 | 1 | 33.1 | 0.71 | 0.07 | 151 | 98 | C5 Complement C5 precursor | DINYVNPVIK                        | 3 | 485.6171 | 2.613 | 0.21  |
| 88 | IPI00032291 | 1 | 33.1 | 0.71 | 0.07 | 151 | 98 | C5 Complement C5 precursor | n[145]VYSLNDDLK[272]PAK[272]JR    | 3 | 651.0494 | 2.512 | 0.206 |
| 88 | IPI00032291 | 1 | 33.1 | 0.71 | 0.07 | 151 | 98 | C5 Complement C5 precursor | n[145]NFEITIK[272]                | 2 | 576.847  | 2.216 | 0.244 |
| 88 | IPI00032291 | 1 | 33.1 | 0.71 | 0.07 | 151 | 98 | C5 Complement C5 precursor | YKHSVVKK                          | 3 | 516.9961 | 2.118 | 0.263 |
| 88 | IPI00032291 | 1 | 33.1 | 0.71 | 0.07 | 151 | 98 | C5 Complement C5 precursor | n[145]GNPPIYR                     | 2 | 480.7728 | 2.386 | 0.127 |
| 88 | IPI00032291 | 1 | 33.1 | 0.71 | 0.07 | 151 | 98 | C5 Complement C5 precursor | VTCTNAELVK                        | 2 | 702.3729 | 2.869 | 0.139 |
| 88 | IPI00032291 | 1 | 33.1 | 0.71 | 0.07 | 151 | 98 | C5 Complement C5 precursor | n[145]LQGTLPVEAR                  | 2 | 614.3625 | 3.227 | 0.079 |
| 88 | IPI00032291 | 1 | 33.1 | 0.71 | 0.07 | 151 | 98 | C5 Complement C5 precursor | VYSLNDDLKPAK                      | 3 | 595.0086 | 1.822 | 0.249 |
| 88 | IPI00032291 | 1 | 33.1 | 0.71 | 0.07 | 151 | 98 | C5 Complement C5 precursor | YVLSPYK                           | 2 | 575.337  | 2.228 | 0.142 |
| 88 | IPI00032291 | 1 | 33.1 | 0.71 | 0.07 | 151 | 98 | C5 Complement C5 precursor | n[145]SYPDK[272]K[272]            | 2 | 585.3482 | 1.962 | 0.18  |
| 88 | IPI00032291 | 1 | 33.1 | 0.71 | 0.07 | 151 | 98 | C5 Complement C5 precursor | n[145]VFQFIEK[272]                | 2 | 599.8574 | 2.681 | 0.167 |
| 88 | IPI00032291 | 1 | 33.1 | 0.71 | 0.07 | 151 | 98 | C5 Complement C5 precursor | n[145]VCEGAACK[272]               | 2 | 580.7624 | 2.02  | 0.13  |
| 88 | IPI00032291 | 1 | 33.1 | 0.71 | 0.07 | 151 | 98 | C5 Complement C5 precursor | n[145]IDTALIK[272]                | 2 | 531.3441 | 2.494 | 0.105 |
| 88 | IPI00032291 | 1 | 33.1 | 0.71 | 0.07 | 151 | 98 | C5 Complement C5 precursor | VFQFIEK                           | 2 | 595.8503 | 2.574 | 0.142 |
| 88 | IPI00032291 | 1 | 33.1 | 0.71 | 0.07 | 151 | 98 | C5 Complement C5 precursor | n[145]EALQIK[272]                 | 2 | 495.3153 | 2.408 | 0.032 |
| 88 | IPI00032291 | 1 | 33.1 | 0.71 | 0.07 | 151 | 98 | C5 Complement C5 precursor | EALQIK                            | 2 | 491.3082 | 2.489 | 0.037 |
| 88 | IPI00032291 | 1 | 33.1 | 0.71 | 0.07 | 151 | 98 | C5 Complement C5 precursor | GYGNSDYK                          | 2 | 592.2908 | 2.083 | 0.234 |
| 88 | IPI00032291 | 1 | 33.1 | 0.71 | 0.07 | 151 | 98 | C5 Complement C5 precursor | n[145]VVPEGVK[272]                | 2 | 508.3232 | 1.748 | 0.016 |
| 88 | IPI00032291 | 1 | 33.1 | 0.71 | 0.07 | 151 | 98 | C5 Complement C5 precursor | n[145]EDLK[272]DDQK[272]          | 3 | 474.9316 | 2.416 | 0.142 |
| 88 | IPI00032291 | 1 | 33.1 | 0.71 | 0.07 | 151 | 98 | C5 Complement C5 precursor | n[145]EGM[147]LSIMSYR             | 2 | 673.8319 | 2.334 | 0.042 |
| 88 | IPI00032291 | 1 | 33.1 | 0.71 | 0.07 | 151 | 98 | C5 Complement C5 precursor | VVPEGVK                           | 2 | 504.3161 | 1.765 | 0.034 |
| 88 | IPI00032291 | 1 | 33.1 | 0.71 | 0.07 | 151 | 98 | C5 Complement C5 precursor | n[145]TSTSEEVCSEFYLK[272]         | 2 | 914.441  | 3.025 | 0.369 |
| 88 | IPI00032291 | 1 | 33.1 | 0.71 | 0.07 | 151 | 98 | C5 Complement C5 precursor | n[145]DSSVPNTGTAR                 | 2 | 624.8187 | 2.276 | 0.158 |
| 88 | IPI00032291 | 1 | 33.1 | 0.71 | 0.07 | 151 | 98 | C5 Complement C5 precursor | n[145]YK[272]EDFSTTGAYFEVK[272]   | 3 | 773.4021 | 2.925 | 0.188 |
| 88 | IPI00032291 | 1 | 33.1 | 0.71 | 0.07 | 151 | 98 | C5 Complement C5 precursor | n[145]YFYNK[272]                  | 2 | 511.7811 | 1.779 | 0.027 |
| 88 | IPI00032291 | 1 | 33.1 | 0.71 | 0.07 | 151 | 98 | C5 Complement C5 precursor | TSTSEEVCSEFYLK                    | 2 | 910.4339 | 1.744 | 0.106 |
| 88 | IPI00032291 | 1 | 33.1 | 0.71 | 0.07 | 151 | 98 | C5 Complement C5 precursor | n[145]WLSEEQR                     | 2 | 546.2837 | 2.128 | 0.013 |
| 88 | IPI00032291 | 1 | 33.1 | 0.71 | 0.07 | 151 | 98 | C5 Complement C5 precursor | IPLDLVPK                          | 2 | 587.8816 | 1.673 | 0.005 |
| 88 | IPI00032291 | 1 | 33.1 | 0.71 | 0.07 | 151 | 98 | C5 Complement C5 precursor | FLKPGIPYPIK                       | 3 | 565.0237 | 3.004 | 0.194 |
| 88 | IPI00032291 | 1 | 33.1 | 0.71 | 0.07 | 151 | 98 | C5 Complement C5 precursor | ITHYNYLILSK                       | 3 | 548.9873 | 2.73  | 0.065 |
| 88 | IPI00032291 | 1 | 33.1 | 0.71 | 0.07 | 151 | 98 | C5 Complement C5 precursor | EDLKDDQK                          | 2 | 705.8831 | 2.102 | 0.151 |
| 88 | IPI00032291 | 1 | 33.1 | 0.71 | 0.07 | 151 | 98 | C5 Complement C5 precursor | FSYSSGHVHLSSENK                   | 4 | 490.4985 | 2.317 | 0.042 |
| 88 | IPI00032291 | 1 | 33.1 | 0.71 | 0.07 | 151 | 98 | C5 Complement C5 precursor | LKEGM[147]LSIM[147]SYR            | 3 | 580.6443 | 1.712 | 0.083 |
| 88 | IPI00032291 | 1 | 33.1 | 0.71 | 0.07 | 151 | 98 | C5 Complement C5 precursor | n[145]YVLSPYK[272]                | 2 | 579.3441 | 1.562 | 0.018 |
| 88 | IPI00032291 | 1 | 33.1 | 0.71 | 0.07 | 151 | 98 | C5 Complement C5 precursor | n[145]FSYSSGH                     | 2 | 464.7177 | 1.906 | 0.312 |
| 88 | IPI00032291 | 1 | 33.1 | 0.71 | 0.07 | 151 | 98 | C5 Complement C5 precursor | EDLKDDQK                          | 3 | 470.9245 | 1.956 | 0.098 |
| 88 | IPI00032291 | 1 | 33.1 | 0.71 | 0.07 | 151 | 98 | C5 Complement C5 precursor | n[145]FSDASYQSINIPVTQNMVPSSR      | 3 | 862.4311 | 2.393 | 0.021 |
| 88 | IPI00032291 | 1 | 33.1 | 0.71 | 0.07 | 151 | 98 | C5 Complement C5 precursor | n[145]VYSLNDDLK[272]PAK[272]      | 3 | 599.0157 | 1.774 | 0.056 |

|    |             |   |      |      |      |     |    |                                                  |                                        |   |           |       |       |
|----|-------------|---|------|------|------|-----|----|--------------------------------------------------|----------------------------------------|---|-----------|-------|-------|
| 88 | IPI00032291 | 1 | 33.1 | 0.71 | 0.07 | 151 | 98 | C5 Complement C5 precursor                       | n[145]SIPSSDFLCVR                      | 2 | 707.353   | 2.609 | 0.147 |
| 88 | IPI00032291 | 1 | 33.1 | 0.71 | 0.07 | 151 | 98 | C5 Complement C5 precursor                       | n[145]EFPYR                            | 2 | 428.2277  | 1.337 | 0     |
| 88 | IPI00032291 | 1 | 33.1 | 0.71 | 0.07 | 151 | 98 | C5 Complement C5 precursor                       | SYDCK                                  | 3 | 386.5608  | 1.257 | 0.027 |
| 88 | IPI00032291 | 1 | 33.1 | 0.71 | 0.07 | 151 | 98 | C5 Complement C5 precursor                       | n[145]DGHVILQLN                        | 2 | 576.8283  | 2.078 | 0.168 |
| 88 | IPI00032291 | 1 | 33.1 | 0.71 | 0.07 | 151 | 98 | C5 Complement C5 precursor                       | n[145]ALSLGDK[272]                     | 2 | 496.305   | 2.226 | 0.066 |
| 88 | IPI00032291 | 1 | 33.1 | 0.71 | 0.07 | 151 | 98 | C5 Complement C5 precursor                       | n[145]JPLDLVPK[272]                    | 2 | 591.8887  | 1.298 | 0.009 |
| 88 | IPI00032291 | 1 | 33.1 | 0.71 | 0.07 | 151 | 98 | C5 Complement C5 precursor                       | n[145]YSVVR                            | 2 | 384.2303  | 1.803 | 0.049 |
| 88 | IPI00032291 | 1 | 33.1 | 0.71 | 0.07 | 151 | 98 | C5 Complement C5 precursor                       | n[145]YSVVR                            | 1 | 767.4533  | 1.967 | 0.106 |
| 88 | IPI00032291 | 1 | 33.1 | 0.71 | 0.07 | 151 | 98 | C5 Complement C5 precursor                       | n[145]JPYSVVR                          | 2 | 489.2987  | 1.877 | 0.088 |
| 88 | IPI00032291 | 1 | 33.1 | 0.71 | 0.07 | 151 | 98 | C5 Complement C5 precursor                       | SVK[272]                               | 1 | 617.4104  | 0.88  | 0.378 |
| 89 | IPI00032311 | 1 | 14.8 | 0.65 | 0.39 | 13  | 11 | LBP Lipopolysaccharide-binding protein precursor | n[145]SPVTLAAVMSLPEEHNK[272]           | 3 | 742.0798  | 4.696 | 0.459 |
| 89 | IPI00032311 | 1 | 14.8 | 0.65 | 0.39 | 13  | 11 | LBP Lipopolysaccharide-binding protein precursor | n[145]VQLYDLGLQIHK[272]                | 3 | 572.3413  | 4.674 | 0.374 |
| 89 | IPI00032311 | 1 | 14.8 | 0.65 | 0.39 | 13  | 11 | LBP Lipopolysaccharide-binding protein precursor | SPVTLAAVMSLPEEHNK                      | 3 | 739.4084  | 4.141 | 0.318 |
| 89 | IPI00032311 | 1 | 14.8 | 0.65 | 0.39 | 13  | 11 | LBP Lipopolysaccharide-binding protein precursor | VQLYDLGLQIHK                           | 3 | 569.6699  | 3.157 | 0.359 |
| 89 | IPI00032311 | 1 | 14.8 | 0.65 | 0.39 | 13  | 11 | LBP Lipopolysaccharide-binding protein precursor | LAEGFPLPLLK                            | 2 | 739.4607  | 3.824 | 0.352 |
| 89 | IPI00032311 | 1 | 14.8 | 0.65 | 0.39 | 13  | 11 | LBP Lipopolysaccharide-binding protein precursor | n[145]LAEGFPLPLLK[272]                 | 2 | 743.4678  | 3.613 | 0.305 |
| 89 | IPI00032311 | 1 | 14.8 | 0.65 | 0.39 | 13  | 11 | LBP Lipopolysaccharide-binding protein precursor | ITGFLKPGK                              | 2 | 690.94    | 3.025 | 0.281 |
| 89 | IPI00032311 | 1 | 14.8 | 0.65 | 0.39 | 13  | 11 | LBP Lipopolysaccharide-binding protein precursor | n[145]ITGFLK[272]PGK[272]              | 2 | 696.9506  | 2.978 | 0.307 |
| 89 | IPI00032311 | 1 | 14.8 | 0.65 | 0.39 | 13  | 11 | LBP Lipopolysaccharide-binding protein precursor | ITGFLKPGK                              | 3 | 460.9624  | 1.994 | 0.087 |
| 89 | IPI00032311 | 1 | 14.8 | 0.65 | 0.39 | 13  | 11 | LBP Lipopolysaccharide-binding protein precursor | n[145]VK[272]VELK[272]                 | 3 | 383.264   | 1.608 | 0.102 |
| 89 | IPI00032311 | 1 | 14.8 | 0.65 | 0.39 | 13  | 11 | LBP Lipopolysaccharide-binding protein precursor | n[145]ANPGLVAR                         | 2 | 471.2861  | 2.432 | 0.139 |
| 89 | IPI00032311 | 1 | 14.8 | 0.65 | 0.39 | 13  | 11 | LBP Lipopolysaccharide-binding protein precursor | GDLR                                   | 1 | 600.3464  | 1.375 | 0.017 |
| 89 | IPI00032311 | 1 | 14.8 | 0.65 | 0.39 | 13  | 11 | LBP Lipopolysaccharide-binding protein precursor | SVK[272]                               | 1 | 617.4104  | 0.88  | 0.378 |
| 90 | IPI00032328 | 1 | 38.2 | 0.82 | 0.03 | 9   | 52 | KNG1 Isoform HMW of Kininogen-1 precursor        | AATGECTATVGK                           | 2 | 717.8576  | 3.932 | 0.488 |
| 90 | IPI00032328 | 1 | 38.2 | 0.82 | 0.03 | 9   | 52 | KNG1 Isoform HMW of Kininogen-1 precursor        | DIPTNSPELEETLTHTITK                    | 2 | 1210.1394 | 6.156 | 0.619 |
| 90 | IPI00032328 | 1 | 38.2 | 0.82 | 0.03 | 9   | 52 | KNG1 Isoform HMW of Kininogen-1 precursor        | IASFSQNCDIYPGK                         | 2 | 934.9553  | 4.661 | 0.541 |
| 90 | IPI00032328 | 1 | 38.2 | 0.82 | 0.03 | 9   | 52 | KNG1 Isoform HMW of Kininogen-1 precursor        | TVGSDTFYSFK                            | 2 | 766.3932  | 3.797 | 0.308 |
| 90 | IPI00032328 | 1 | 38.2 | 0.82 | 0.03 | 9   | 52 | KNG1 Isoform HMW of Kininogen-1 precursor        | n[145]AATGECTATVGK[272]                | 2 | 721.8647  | 4.023 | 0.39  |
| 90 | IPI00032328 | 1 | 38.2 | 0.82 | 0.03 | 9   | 52 | KNG1 Isoform HMW of Kininogen-1 precursor        | n[145]AVDAALK[272]K[272]               | 2 | 624.4061  | 3.265 | 0.429 |
| 90 | IPI00032328 | 1 | 38.2 | 0.82 | 0.03 | 9   | 52 | KNG1 Isoform HMW of Kininogen-1 precursor        | n[145]DIPTNSPELEETLTHTITK[272]         | 2 | 1214.1465 | 6.661 | 0.621 |
| 90 | IPI00032328 | 1 | 38.2 | 0.82 | 0.03 | 9   | 52 | KNG1 Isoform HMW of Kininogen-1 precursor        | n[145]IASFSQNCDIYPGK[272]              | 2 | 938.9624  | 4.537 | 0.539 |
| 90 | IPI00032328 | 1 | 38.2 | 0.82 | 0.03 | 9   | 52 | KNG1 Isoform HMW of Kininogen-1 precursor        | n[145]TVGSDTFYSFK[272]                 | 2 | 770.4003  | 3.883 | 0.422 |
| 90 | IPI00032328 | 1 | 38.2 | 0.82 | 0.03 | 9   | 52 | KNG1 Isoform HMW of Kininogen-1 precursor        | n[145]YNSQNSNNQFVLYR                   | 2 | 1009.9937 | 6.31  | 0.461 |
| 90 | IPI00032328 | 1 | 38.2 | 0.82 | 0.03 | 9   | 52 | KNG1 Isoform HMW of Kininogen-1 precursor        | DIPTNSPELEETLTHTITK                    | 3 | 807.0954  | 3.436 | 0.161 |
| 90 | IPI00032328 | 1 | 38.2 | 0.82 | 0.03 | 9   | 52 | KNG1 Isoform HMW of Kininogen-1 precursor        | FKLDDLEHQGGHVLHDHGK                    | 3 | 906.4684  | 6.016 | 0.538 |
| 90 | IPI00032328 | 1 | 38.2 | 0.82 | 0.03 | 9   | 52 | KNG1 Isoform HMW of Kininogen-1 precursor        | GHGLGHGHEQQHGLGHGK                     | 3 | 754.0496  | 5.892 | 0.517 |
| 90 | IPI00032328 | 1 | 38.2 | 0.82 | 0.03 | 9   | 52 | KNG1 Isoform HMW of Kininogen-1 precursor        | KYFIDFVAR                              | 3 | 480.2784  | 4.364 | 0.354 |
| 90 | IPI00032328 | 1 | 38.2 | 0.82 | 0.03 | 9   | 52 | KNG1 Isoform HMW of Kininogen-1 precursor        | KYNSQNSNNQFVLYR                        | 3 | 761.7258  | 4.334 | 0.45  |
| 90 | IPI00032328 | 1 | 38.2 | 0.82 | 0.03 | 9   | 52 | KNG1 Isoform HMW of Kininogen-1 precursor        | n[145]DIPTNSPELEETLTHTITK[272]         | 3 | 809.7668  | 2.435 | 0.122 |
| 90 | IPI00032328 | 1 | 38.2 | 0.82 | 0.03 | 9   | 52 | KNG1 Isoform HMW of Kininogen-1 precursor        | n[145]GHGLGHGHEQQHGLGHGK[272]          | 3 | 756.721   | 6.481 | 0.565 |
| 90 | IPI00032328 | 1 | 38.2 | 0.82 | 0.03 | 9   | 52 | KNG1 Isoform HMW of Kininogen-1 precursor        | FKLDDLEHQGGHVLHDHGK                    | 4 | 680.1032  | 4.229 | 0.474 |
| 90 | IPI00032328 | 1 | 38.2 | 0.82 | 0.03 | 9   | 52 | KNG1 Isoform HMW of Kininogen-1 precursor        | GHGLGHGHEQQHGLGHGK                     | 4 | 565.7891  | 5.789 | 0.571 |
| 90 | IPI00032328 | 1 | 38.2 | 0.82 | 0.03 | 9   | 52 | KNG1 Isoform HMW of Kininogen-1 precursor        | n[145]GHGLGHGHEQQHGLGHGK[272]          | 4 | 567.7926  | 3.962 | 0.304 |
| 90 | IPI00032328 | 1 | 38.2 | 0.82 | 0.03 | 9   | 52 | KNG1 Isoform HMW of Kininogen-1 precursor        | n[145]GHGLGHGHEQQHGLGHGK[272]          | 5 | 454.4355  | 3.332 | 0.322 |
| 90 | IPI00032328 | 1 | 38.2 | 0.82 | 0.03 | 9   | 52 | KNG1 Isoform HMW of Kininogen-1 precursor        | AVDAALKK                               | 3 | 412.5994  | 2.374 | 0.342 |
| 90 | IPI00032328 | 1 | 38.2 | 0.82 | 0.03 | 9   | 52 | KNG1 Isoform HMW of Kininogen-1 precursor        | n[145]AVDAALK[272]K[272]               | 3 | 416.6065  | 2.264 | 0.345 |
| 90 | IPI00032328 | 1 | 38.2 | 0.82 | 0.03 | 9   | 52 | KNG1 Isoform HMW of Kininogen-1 precursor        | n[145]IASFSQNCDIYPGK[272]DFVQPPTK[272] | 3 | 978.5016  | 4.255 | 0.387 |
| 90 | IPI00032328 | 1 | 38.2 | 0.82 | 0.03 | 9   | 52 | KNG1 Isoform HMW of Kininogen-1 precursor        | n[145]VQVVAGK[272]K[272]               | 3 | 420.9503  | 2.485 | 0.327 |

|    |             |   |      |      |      |    |    |                                                                   |                                        |   |          |       |       |
|----|-------------|---|------|------|------|----|----|-------------------------------------------------------------------|----------------------------------------|---|----------|-------|-------|
| 90 | IPI00032328 | 1 | 38.2 | 0.82 | 0.03 | 9  | 52 | KNG1 Isoform HMW of Kininogen-1 precursor                         | n[145]IASFSQNCDIYPGK[272]DFVQPPTK[272] | 4 | 734.128  | 3.901 | 0.397 |
| 90 | IPI00032328 | 1 | 38.2 | 0.82 | 0.03 | 9  | 52 | KNG1 Isoform HMW of Kininogen-1 precursor                         | n[145]VQVVAGK[272]K[272]               | 2 | 630.9219 | 2.949 | 0.454 |
| 90 | IPI00032328 | 1 | 38.2 | 0.82 | 0.03 | 9  | 52 | KNG1 Isoform HMW of Kininogen-1 precursor                         | TVGSDTFYFSKYEIK                        | 3 | 735.7246 | 3.593 | 0.356 |
| 90 | IPI00032328 | 1 | 38.2 | 0.82 | 0.03 | 9  | 52 | KNG1 Isoform HMW of Kininogen-1 precursor                         | VQVVAGKK                               | 3 | 416.9432 | 2.217 | 0.31  |
| 90 | IPI00032328 | 1 | 38.2 | 0.82 | 0.03 | 9  | 52 | KNG1 Isoform HMW of Kininogen-1 precursor                         | n[145]YNSQNSNNQFVLYR                   | 3 | 673.6649 | 3.213 | 0.311 |
| 90 | IPI00032328 | 1 | 38.2 | 0.82 | 0.03 | 9  | 52 | KNG1 Isoform HMW of Kininogen-1 precursor                         | TWQDCEYK                               | 2 | 699.8127 | 2.887 | 0.436 |
| 90 | IPI00032328 | 1 | 38.2 | 0.82 | 0.03 | 9  | 52 | KNG1 Isoform HMW of Kininogen-1 precursor                         | n[145]EGDCPVQSGK[272]                  | 2 | 677.3227 | 2.709 | 0.264 |
| 90 | IPI00032328 | 1 | 38.2 | 0.82 | 0.03 | 9  | 52 | KNG1 Isoform HMW of Kininogen-1 precursor                         | n[145]ENFLFLTPDCK[272]                 | 2 | 830.9195 | 3.004 | 0.385 |
| 90 | IPI00032328 | 1 | 38.2 | 0.82 | 0.03 | 9  | 52 | KNG1 Isoform HMW of Kininogen-1 precursor                         | EGDCPVQSGK                             | 2 | 673.3156 | 2.229 | 0.245 |
| 90 | IPI00032328 | 1 | 38.2 | 0.82 | 0.03 | 9  | 52 | KNG1 Isoform HMW of Kininogen-1 precursor                         | KYFIDFVAR                              | 2 | 719.9139 | 3.42  | 0.289 |
| 90 | IPI00032328 | 1 | 38.2 | 0.82 | 0.03 | 9  | 52 | KNG1 Isoform HMW of Kininogen-1 precursor                         | VQVVAGKK                               | 2 | 624.9112 | 2.668 | 0.303 |
| 90 | IPI00032328 | 1 | 38.2 | 0.82 | 0.03 | 9  | 52 | KNG1 Isoform HMW of Kininogen-1 precursor                         | n[145]YFIDFVAR                         | 2 | 587.8225 | 2.207 | 0.392 |
| 90 | IPI00032328 | 1 | 38.2 | 0.82 | 0.03 | 9  | 52 | KNG1 Isoform HMW of Kininogen-1 precursor                         | DFVQPPTK                               | 2 | 606.3428 | 2.294 | 0.202 |
| 90 | IPI00032328 | 1 | 38.2 | 0.82 | 0.03 | 9  | 52 | KNG1 Isoform HMW of Kininogen-1 precursor                         | n[145]SVSEINPTTQM[147]K[272]           | 2 | 819.9342 | 3.043 | 0.333 |
| 90 | IPI00032328 | 1 | 38.2 | 0.82 | 0.03 | 9  | 52 | KNG1 Isoform HMW of Kininogen-1 precursor                         | VQVVAGK                                | 2 | 490.8162 | 3.032 | 0.186 |
| 90 | IPI00032328 | 1 | 38.2 | 0.82 | 0.03 | 9  | 52 | KNG1 Isoform HMW of Kininogen-1 precursor                         | n[145]TWQDCEYK[272]                    | 2 | 703.8198 | 2.659 | 0.315 |
| 90 | IPI00032328 | 1 | 38.2 | 0.82 | 0.03 | 9  | 52 | KNG1 Isoform HMW of Kininogen-1 precursor                         | n[145]TVGSDTFYSFK[272]YEIK[272]        | 3 | 739.7317 | 3.68  | 0.229 |
| 90 | IPI00032328 | 1 | 38.2 | 0.82 | 0.03 | 9  | 52 | KNG1 Isoform HMW of Kininogen-1 precursor                         | n[145]VQVVAGK[272]                     | 2 | 494.8233 | 2.593 | 0.178 |
| 90 | IPI00032328 | 1 | 38.2 | 0.82 | 0.03 | 9  | 52 | KNG1 Isoform HMW of Kininogen-1 precursor                         | n[145]AVDAALK[272]                     | 2 | 488.3075 | 2.198 | 0.188 |
| 90 | IPI00032328 | 1 | 38.2 | 0.82 | 0.03 | 9  | 52 | KNG1 Isoform HMW of Kininogen-1 precursor                         | n[145]ICVGCPR                          | 2 | 492.2244 | 1.902 | 0.206 |
| 90 | IPI00032328 | 1 | 38.2 | 0.82 | 0.03 | 9  | 52 | KNG1 Isoform HMW of Kininogen-1 precursor                         | AVDAALK                                | 2 | 484.3004 | 2.449 | 0.188 |
| 90 | IPI00032328 | 1 | 38.2 | 0.82 | 0.03 | 9  | 52 | KNG1 Isoform HMW of Kininogen-1 precursor                         | n[145]DFVQPPTK[272]                    | 2 | 610.3499 | 2.114 | 0.137 |
| 90 | IPI00032328 | 1 | 38.2 | 0.82 | 0.03 | 9  | 52 | KNG1 Isoform HMW of Kininogen-1 precursor                         | n[145]QVVAGLNFR                        | 2 | 574.3389 | 2.605 | 0.145 |
| 90 | IPI00032328 | 1 | 38.2 | 0.82 | 0.03 | 9  | 52 | KNG1 Isoform HMW of Kininogen-1 precursor                         | ITEATK                                 | 2 | 471.7846 | 1.741 | 0.035 |
| 90 | IPI00032328 | 1 | 38.2 | 0.82 | 0.03 | 9  | 52 | KNG1 Isoform HMW of Kininogen-1 precursor                         | n[145]ITEATK[272]                      | 2 | 475.7917 | 2.142 | 0.073 |
| 90 | IPI00032328 | 1 | 38.2 | 0.82 | 0.03 | 9  | 52 | KNG1 Isoform HMW of Kininogen-1 precursor                         | AVDAALKK                               | 2 | 618.3954 | 1.972 | 0.143 |
| 90 | IPI00032328 | 1 | 38.2 | 0.82 | 0.03 | 9  | 52 | KNG1 Isoform HMW of Kininogen-1 precursor                         | n[145]ETTCCK[272]                      | 2 | 501.7456 | 1.891 | 0.168 |
| 90 | IPI00032328 | 1 | 38.2 | 0.82 | 0.03 | 9  | 52 | KNG1 Isoform HMW of Kininogen-1 precursor                         | IDNVKK                                 | 2 | 568.8612 | 2.026 | 0.076 |
| 90 | IPI00032328 | 1 | 38.2 | 0.82 | 0.03 | 9  | 52 | KNG1 Isoform HMW of Kininogen-1 precursor                         | IDNVK                                  | 2 | 434.7662 | 1.944 | 0.066 |
| 90 | IPI00032328 | 1 | 38.2 | 0.82 | 0.03 | 9  | 52 | KNG1 Isoform HMW of Kininogen-1 precursor                         | YEIKEGDCPVQSGK                         | 3 | 673.6728 | 2.449 | 0.181 |
| 90 | IPI00032328 | 1 | 38.2 | 0.82 | 0.03 | 9  | 52 | KNG1 Isoform HMW of Kininogen-1 precursor                         | n[145]SDTFYSFK[272]                    | 2 | 641.8316 | 3.152 | 0.331 |
| 90 | IPI00032328 | 1 | 38.2 | 0.82 | 0.03 | 9  | 52 | KNG1 Isoform HMW of Kininogen-1 precursor                         | n[145]FIDFVAR                          | 2 | 506.2908 | 2.415 | 0.089 |
| 90 | IPI00032328 | 1 | 38.2 | 0.82 | 0.03 | 9  | 52 | KNG1 Isoform HMW of Kininogen-1 precursor                         | TVGSDTFYSFK                            | 3 | 511.2646 | 2.527 | 0.079 |
| 90 | IPI00032328 | 1 | 38.2 | 0.82 | 0.03 | 9  | 52 | KNG1 Isoform HMW of Kininogen-1 precursor                         | n[145]CQPLGM[147]ISLM[147]K[272]       | 2 | 793.9045 | 3.027 | 0.286 |
| 90 | IPI00032328 | 1 | 38.2 | 0.82 | 0.03 | 9  | 52 | KNG1 Isoform HMW of Kininogen-1 precursor                         | n[145]IYPTVNCQPLGM[147]                | 2 | 771.3678 | 2.928 | 0.33  |
| 90 | IPI00032328 | 1 | 38.2 | 0.82 | 0.03 | 9  | 52 | KNG1 Isoform HMW of Kininogen-1 precursor                         | CQPLGM[147]ISLM[147]K                  | 2 | 789.8974 | 2.869 | 0.234 |
| 90 | IPI00032328 | 1 | 38.2 | 0.82 | 0.03 | 9  | 52 | KNG1 Isoform HMW of Kininogen-1 precursor                         | n[145]IYPTVNCQPLGM                     | 2 | 763.3703 | 2.776 | 0.138 |
| 90 | IPI00032328 | 1 | 38.2 | 0.82 | 0.03 | 9  | 52 | KNG1 Isoform HMW of Kininogen-1 precursor                         | IYPTVN                                 | 1 | 846.472  | 1.7   | 0.123 |
| 90 | IPI00032328 | 1 | 38.2 | 0.82 | 0.03 | 9  | 52 | KNG1 Isoform HMW of Kininogen-1 precursor                         | n[145]RPPGFSPF                         | 2 | 524.7885 | 1.56  | 0.098 |
| 91 | IPI00044369 | 1 | 3.1  | 1.08 | 0    | 2  | 2  | PLXDC2 Isoform 1 of Plexin domain-containing protein 2 precursor  | n[145]VGLSDAFVVVHR                     | 3 | 481.6127 | 4.162 | 0.411 |
| 91 | IPI00044369 | 1 | 3.1  | 1.08 | 0    | 2  | 2  | PLXDC2 Isoform 1 of Plexin domain-containing protein 2 precursor  | VGLSDAFVVVHR                           | 3 | 480.277  | 3.096 | 0.242 |
| 92 | IPI00163207 | 1 | 18.6 | 0.68 | 0.22 | 21 | 15 | PGLYRP2 Isoform 1 of N-acetylmuramoyl-L-alanine amidase precursor | AGLLRPDYALLGHR                         | 2 | 846.4888 | 4.1   | 0.498 |
| 92 | IPI00163207 | 1 | 18.6 | 0.68 | 0.22 | 21 | 15 | PGLYRP2 Isoform 1 of N-acetylmuramoyl-L-alanine amidase precursor | GCPDVQASLPDAK                          | 2 | 813.9026 | 4.395 | 0.535 |
| 92 | IPI00163207 | 1 | 18.6 | 0.68 | 0.22 | 21 | 15 | PGLYRP2 Isoform 1 of N-acetylmuramoyl-L-alanine amidase precursor | n[145]GCPDVQASLPDAK[272]               | 2 | 817.9097 | 4.428 | 0.491 |
| 92 | IPI00163207 | 1 | 18.6 | 0.68 | 0.22 | 21 | 15 | PGLYRP2 Isoform 1 of N-acetylmuramoyl-L-alanine amidase precursor | n[145]AGLLRPDYALLGHR                   | 3 | 565.9973 | 3.185 | 0.288 |
| 92 | IPI00163207 | 1 | 18.6 | 0.68 | 0.22 | 21 | 15 | PGLYRP2 Isoform 1 of N-acetylmuramoyl-L-alanine amidase precursor | n[145]EFTEAFLGCPAIHPR                  | 3 | 626.6435 | 5.278 | 0.46  |
| 92 | IPI00163207 | 1 | 18.6 | 0.68 | 0.22 | 21 | 15 | PGLYRP2 Isoform 1 of N-acetylmuramoyl-L-alanine amidase precursor | n[145]AGLLRPDYALLGHR                   | 4 | 424.7498 | 2.43  | 0.061 |
| 92 | IPI00163207 | 1 | 18.6 | 0.68 | 0.22 | 21 | 15 | PGLYRP2 Isoform 1 of N-acetylmuramoyl-L-alanine amidase precursor | n[145]AGLLRPDYALLGHR                   | 2 | 848.4924 | 4.395 | 0.389 |

|    |             |   |      |      |      |    |    |                                                                      |                                     |   |          |       |       |
|----|-------------|---|------|------|------|----|----|----------------------------------------------------------------------|-------------------------------------|---|----------|-------|-------|
| 92 | IPI00163207 | 1 | 18.6 | 0.68 | 0.22 | 21 | 15 | PGLYRP2 Isoform 1 of N-acetylmuramoyl-L-alanine amidase precursor    | n[145]TDCPGDALFDLLR                 | 2 | 813.3928 | 3.958 | 0.371 |
| 92 | IPI00163207 | 1 | 18.6 | 0.68 | 0.22 | 21 | 15 | PGLYRP2 Isoform 1 of N-acetylmuramoyl-L-alanine amidase precursor    | n[145]PSLSHLLSQYYGAGVAR             | 3 | 655.0221 | 3.485 | 0.346 |
| 92 | IPI00163207 | 1 | 18.6 | 0.68 | 0.22 | 21 | 15 | PGLYRP2 Isoform 1 of N-acetylmuramoyl-L-alanine amidase precursor    | SLPLLM[147]DSVIQALAELEQK            | 3 | 798.782  | 3.795 | 0.276 |
| 92 | IPI00163207 | 1 | 18.6 | 0.68 | 0.22 | 21 | 15 | PGLYRP2 Isoform 1 of N-acetylmuramoyl-L-alanine amidase precursor    | n[145]DTLPSCAVR                     | 2 | 576.2871 | 2.298 | 0.049 |
| 92 | IPI00163207 | 1 | 18.6 | 0.68 | 0.22 | 21 | 15 | PGLYRP2 Isoform 1 of N-acetylmuramoyl-L-alanine amidase precursor    | n[145]SLPLLM[147]DSVIQALAELEQK[272] | 3 | 801.4534 | 3.228 | 0.267 |
| 92 | IPI00163207 | 1 | 18.6 | 0.68 | 0.22 | 21 | 15 | PGLYRP2 Isoform 1 of N-acetylmuramoyl-L-alanine amidase precursor    | AGLLRPDYALLGHR                      | 4 | 423.7481 | 1.934 | 0.019 |
| 92 | IPI00163207 | 1 | 18.6 | 0.68 | 0.22 | 21 | 15 | PGLYRP2 Isoform 1 of N-acetylmuramoyl-L-alanine amidase precursor    | n[145]EFTEAFLGCPAIHPR               | 2 | 939.4616 | 2.569 | 0.252 |
| 92 | IPI00163207 | 1 | 18.6 | 0.68 | 0.22 | 21 | 15 | PGLYRP2 Isoform 1 of N-acetylmuramoyl-L-alanine amidase precursor    | AGLLRPDYALLG                        | 2 | 699.9088 | 2.12  | 0.303 |
| 92 | IPI00163207 | 1 | 18.6 | 0.68 | 0.22 | 21 | 15 | PGLYRP2 Isoform 1 of N-acetylmuramoyl-L-alanine amidase precursor    | n[145]WGAAPYR                       | 2 | 482.7597 | 2.027 | 0.055 |
| 92 | IPI00163207 | 1 | 18.6 | 0.68 | 0.22 | 21 | 15 | PGLYRP2 Isoform 1 of N-acetylmuramoyl-L-alanine amidase precursor    | n[145]AGLLRPDYALLG                  | 2 | 701.9124 | 1.677 | 0.164 |
| 93 | IPI00165972 | 1 | 11.2 | 1.49 | 0.64 | 6  | 4  | CFD Complement factor D preproprotein                                | RPDSLQHVLLPVLDR                     | 3 | 633.3705 | 3.989 | 0.522 |
| 93 | IPI00165972 | 1 | 11.2 | 1.49 | 0.64 | 6  | 4  | CFD Complement factor D preproprotein                                | n[145]RPDSLQHVLLPVLDR               | 3 | 634.7062 | 3.654 | 0.376 |
| 93 | IPI00165972 | 1 | 11.2 | 1.49 | 0.64 | 6  | 4  | CFD Complement factor D preproprotein                                | n[145]RPDSLQHVLLPVLDR               | 4 | 476.2815 | 4.244 | 0.448 |
| 93 | IPI00165972 | 1 | 11.2 | 1.49 | 0.64 | 6  | 4  | CFD Complement factor D preproprotein                                | VQVLLGAH                            | 2 | 488.8006 | 2.162 | 0.393 |
| 93 | IPI00165972 | 1 | 11.2 | 1.49 | 0.64 | 6  | 4  | CFD Complement factor D preproprotein                                | n[145]PGIYTR                        | 2 | 425.7488 | 1.958 | 0.019 |
| 94 | IPI00167093 | 1 | 23   | 1.58 | 0.4  | 8  | 8  | CFHR1 complement factor H-related 1                                  | INHGILYDEEK                         | 2 | 805.9305 | 4.335 | 0.363 |
| 94 | IPI00167093 | 1 | 23   | 1.58 | 0.4  | 8  | 8  | CFHR1 complement factor H-related 1                                  | STDTSCVNPPTVQNAH                    | 2 | 928.9169 | 5.071 | 0.517 |
| 94 | IPI00167093 | 1 | 23   | 1.58 | 0.4  | 8  | 8  | CFHR1 complement factor H-related 1                                  | n[145]EIM[147]ENYNIALR              | 2 | 763.3937 | 3.642 | 0.438 |
| 94 | IPI00167093 | 1 | 23   | 1.58 | 0.4  | 8  | 8  | CFHR1 complement factor H-related 1                                  | n[145]INHGILYDEEK[272]              | 2 | 809.9376 | 4.647 | 0.433 |
| 94 | IPI00167093 | 1 | 23   | 1.58 | 0.4  | 8  | 8  | CFHR1 complement factor H-related 1                                  | n[145]STDTSCVNPPTVQNAH              | 2 | 930.9205 | 4.271 | 0.508 |
| 94 | IPI00167093 | 1 | 23   | 1.58 | 0.4  | 8  | 8  | CFHR1 complement factor H-related 1                                  | n[145]INHGILYDEEK[272]              | 3 | 540.2942 | 3.53  | 0.38  |
| 94 | IPI00167093 | 1 | 23   | 1.58 | 0.4  | 8  | 8  | CFHR1 complement factor H-related 1                                  | n[145]EIMENYNIALR                   | 2 | 755.3962 | 3.934 | 0.346 |
| 94 | IPI00167093 | 1 | 23   | 1.58 | 0.4  | 8  | 8  | CFHR1 complement factor H-related 1                                  | n[145]CLHPCVISR                     | 3 | 421.8699 | 2.184 | 0.298 |
| 94 | IPI00167093 | 1 | 23   | 1.58 | 0.4  | 8  | 8  | CFHR1 complement factor H-related 1                                  | TGESAEFVCK                          | 2 | 698.8336 | 2.45  | 0.405 |
| 94 | IPI00167093 | 1 | 23   | 1.58 | 0.4  | 8  | 8  | CFHR1 complement factor H-related 1                                  | LEYPTCAK                            | 2 | 625.8173 | 2.06  | 0.264 |
| 94 | IPI00167093 | 1 | 23   | 1.58 | 0.4  | 8  | 8  | CFHR1 complement factor H-related 1                                  | n[145]LEYPTCAK[272]                 | 2 | 629.8244 | 2.457 | 0.162 |
| 94 | IPI00167093 | 1 | 23   | 1.58 | 0.4  | 8  | 8  | CFHR1 complement factor H-related 1                                  | INHGILYDEEK                         | 3 | 537.6228 | 3.311 | 0.167 |
| 94 | IPI00167093 | 1 | 23   | 1.58 | 0.4  | 8  | 8  | CFHR1 complement factor H-related 1                                  | n[145]YECR                          | 2 | 380.6656 | 1.459 | 0.182 |
| 94 | IPI00167093 | 1 | 23   | 1.58 | 0.4  | 8  | 8  | CFHR1 complement factor H-related 1                                  | n[145]TTCWDGK[272]                  | 2 | 572.7721 | 1.69  | 0.116 |
| 94 | IPI00167093 | 1 | 23   | 1.58 | 0.4  | 8  | 8  | CFHR1 complement factor H-related 1                                  | n[145]TGESAEFVCK[272]               | 2 | 702.8407 | 1.331 | 0.144 |
| 94 | IPI00167093 | 1 | 23   | 1.58 | 0.4  | 8  | 8  | CFHR1 complement factor H-related 1                                  | n[145]LEYPTCA                       | 1 | 986.4444 | 1.966 | 0.147 |
| 94 | IPI00167093 | 1 | 23   | 1.58 | 0.4  | 8  | 8  | CFHR1 complement factor H-related 1                                  | DTSCVNPPTVQ                         | 2 | 673.8076 | 1.634 | 0.169 |
| 95 | IPI00178375 | 1 | 0.7  | 0.94 | 0.05 | 12 | 4  | HISPPD1 Isoform 2 of Inositol hexakisphosphate and diphosphoinositol | n[145]ARLHEILQK[272]                | 3 | 465.9607 | 3.761 | 0.163 |
| 95 | IPI00178375 | 1 | 0.7  | 0.94 | 0.05 | 12 | 4  | HISPPD1 Isoform 2 of Inositol hexakisphosphate and diphosphoinositol | ARLHEILQK                           | 2 | 694.4303 | 2.584 | 0.104 |
| 95 | IPI00178375 | 1 | 0.7  | 0.94 | 0.05 | 12 | 4  | HISPPD1 Isoform 2 of Inositol hexakisphosphate and diphosphoinositol | ARLHEILQK                           | 3 | 463.2893 | 3.384 | 0.077 |
| 95 | IPI00178375 | 1 | 0.7  | 0.94 | 0.05 | 12 | 4  | HISPPD1 Isoform 2 of Inositol hexakisphosphate and diphosphoinositol | n[145]ARLHEILQK[272]                | 2 | 698.4374 | 2.662 | 0.149 |
| 96 | IPI00178926 | 1 | 8.8  | 0.78 | 0.05 | 4  | 4  | IGJ immunoglobulin J chain                                           | n[145]FVYHLSLCK[272]                | 2 | 779.9037 | 3.912 | 0.329 |
| 96 | IPI00178926 | 1 | 8.8  | 0.78 | 0.05 | 4  | 4  | IGJ immunoglobulin J chain                                           | FVYHLSLCK                           | 2 | 775.8966 | 3.861 | 0.233 |
| 96 | IPI00178926 | 1 | 8.8  | 0.78 | 0.05 | 4  | 4  | IGJ immunoglobulin J chain                                           | n[145]FVYHLSLCK[272]                | 3 | 520.2715 | 2.668 | 0.122 |
| 96 | IPI00178926 | 1 | 8.8  | 0.78 | 0.05 | 4  | 4  | IGJ immunoglobulin J chain                                           | FVYHLSLCK                           | 3 | 517.6001 | 2.582 | 0.064 |
| 96 | IPI00178926 | 1 | 8.8  | 0.78 | 0.05 | 4  | 4  | IGJ immunoglobulin J chain                                           | SPLR                                | 1 | 612.3828 | 1.332 | 0.125 |
| 97 | IPI00186903 | 1 | 25.4 | 1.04 | 0.34 | 29 | 19 | APOL1 Isoform 2 of Apolipoprotein-L1 precursor                       | n[145]VTEPISAESGEQVER               | 2 | 887.9506 | 4.184 | 0.443 |
| 97 | IPI00186903 | 1 | 25.4 | 1.04 | 0.34 | 29 | 19 | APOL1 Isoform 2 of Apolipoprotein-L1 precursor                       | SETAEELKK                           | 3 | 485.612  | 3.051 | 0.243 |
| 97 | IPI00186903 | 1 | 25.4 | 1.04 | 0.34 | 29 | 19 | APOL1 Isoform 2 of Apolipoprotein-L1 precursor                       | n[145]SETAEELK[272]K[272]           | 3 | 489.6191 | 3.763 | 0.286 |
| 97 | IPI00186903 | 1 | 25.4 | 1.04 | 0.34 | 29 | 19 | APOL1 Isoform 2 of Apolipoprotein-L1 precursor                       | n[145]SETAEELK[272]K[272]           | 2 | 733.925  | 3.045 | 0.307 |
| 97 | IPI00186903 | 1 | 25.4 | 1.04 | 0.34 | 29 | 19 | APOL1 Isoform 2 of Apolipoprotein-L1 precursor                       | ALADGVQK                            | 2 | 541.3219 | 2.811 | 0.141 |
| 97 | IPI00186903 | 1 | 25.4 | 1.04 | 0.34 | 29 | 19 | APOL1 Isoform 2 of Apolipoprotein-L1 precursor                       | NEADELRK                            | 2 | 627.8437 | 2.881 | 0.158 |
| 97 | IPI00186903 | 1 | 25.4 | 1.04 | 0.34 | 29 | 19 | APOL1 Isoform 2 of Apolipoprotein-L1 precursor                       | SETAEELKK                           | 2 | 727.9144 | 3.304 | 0.313 |

|    |             |   |      |      |      |    |    |                                                |                                        |   |           |       |       |
|----|-------------|---|------|------|------|----|----|------------------------------------------------|----------------------------------------|---|-----------|-------|-------|
| 97 | IPI00186903 | 1 | 25.4 | 1.04 | 0.34 | 29 | 19 | APOL1 Isoform 2 of Apolipoprotein-L1 precursor | VAQELEEK                               | 2 | 613.343   | 3.54  | 0.141 |
| 97 | IPI00186903 | 1 | 25.4 | 1.04 | 0.34 | 29 | 19 | APOL1 Isoform 2 of Apolipoprotein-L1 precursor | ALDNLAR                                | 2 | 456.7667  | 2.587 | 0.126 |
| 97 | IPI00186903 | 1 | 25.4 | 1.04 | 0.34 | 29 | 19 | APOL1 Isoform 2 of Apolipoprotein-L1 precursor | n[145]NEADELRK[272]                    | 2 | 631.8508  | 2.643 | 0.181 |
| 97 | IPI00186903 | 1 | 25.4 | 1.04 | 0.34 | 29 | 19 | APOL1 Isoform 2 of Apolipoprotein-L1 precursor | LNILNNNYK                              | 2 | 693.3987  | 3.274 | 0.058 |
| 97 | IPI00186903 | 1 | 25.4 | 1.04 | 0.34 | 29 | 19 | APOL1 Isoform 2 of Apolipoprotein-L1 precursor | n[145]ANLQSVPHASASR                    | 3 | 494.6029  | 2.856 | 0.282 |
| 97 | IPI00186903 | 1 | 25.4 | 1.04 | 0.34 | 29 | 19 | APOL1 Isoform 2 of Apolipoprotein-L1 precursor | n[145]NEADELRK[272]                    | 3 | 421.5696  | 2.588 | 0.136 |
| 97 | IPI00186903 | 1 | 25.4 | 1.04 | 0.34 | 29 | 19 | APOL1 Isoform 2 of Apolipoprotein-L1 precursor | n[145]ALADGVQK[272]                    | 2 | 545.329   | 2.15  | 0.085 |
| 97 | IPI00186903 | 1 | 25.4 | 1.04 | 0.34 | 29 | 19 | APOL1 Isoform 2 of Apolipoprotein-L1 precursor | SKLEDNIR                               | 2 | 627.8619  | 3.082 | 0.119 |
| 97 | IPI00186903 | 1 | 25.4 | 1.04 | 0.34 | 29 | 19 | APOL1 Isoform 2 of Apolipoprotein-L1 precursor | SKLEDNIR                               | 3 | 418.9104  | 2.659 | 0.109 |
| 97 | IPI00186903 | 1 | 25.4 | 1.04 | 0.34 | 29 | 19 | APOL1 Isoform 2 of Apolipoprotein-L1 precursor | n[145]SK[272]LEDNIR                    | 2 | 631.869   | 2.772 | 0.066 |
| 97 | IPI00186903 | 1 | 25.4 | 1.04 | 0.34 | 29 | 19 | APOL1 Isoform 2 of Apolipoprotein-L1 precursor | n[145]VNEPSILEM[147]SR                 | 2 | 717.8726  | 2.198 | 0.026 |
| 97 | IPI00186903 | 1 | 25.4 | 1.04 | 0.34 | 29 | 19 | APOL1 Isoform 2 of Apolipoprotein-L1 precursor | NEADELRK                               | 3 | 418.8982  | 1.801 | 0.041 |
| 97 | IPI00186903 | 1 | 25.4 | 1.04 | 0.34 | 29 | 19 | APOL1 Isoform 2 of Apolipoprotein-L1 precursor | AELPR                                  | 1 | 725.4305  | 1.443 | 0.051 |
| 98 | IPI00215894 | 1 | 49.9 | 0.75 | 0.05 | 11 | 9  | KNG1 Isoform LMW of Kininogen-1 precursor      | AATGECTATVGK                           | 2 | 717.8576  | 3.932 | 0.488 |
| 98 | IPI00215894 | 1 | 49.9 | 0.75 | 0.05 | 11 | 9  | KNG1 Isoform LMW of Kininogen-1 precursor      | DIPTNSPELEETLTHITK                     | 2 | 1210.1394 | 6.156 | 0.619 |
| 98 | IPI00215894 | 1 | 49.9 | 0.75 | 0.05 | 11 | 9  | KNG1 Isoform LMW of Kininogen-1 precursor      | IASFQNCDIYPGK                          | 2 | 934.9553  | 4.661 | 0.541 |
| 98 | IPI00215894 | 1 | 49.9 | 0.75 | 0.05 | 11 | 9  | KNG1 Isoform LMW of Kininogen-1 precursor      | I GEI KEETTSHLR                        | 2 | 896.9995  | 4.222 | 0.466 |
| 98 | IPI00215894 | 1 | 49.9 | 0.75 | 0.05 | 11 | 9  | KNG1 Isoform LMW of Kininogen-1 precursor      | TVGSDTFYSFK                            | 2 | 766.3932  | 3.797 | 0.308 |
| 98 | IPI00215894 | 1 | 49.9 | 0.75 | 0.05 | 11 | 9  | KNG1 Isoform LMW of Kininogen-1 precursor      | n[145]AATGECTATVGK[272]                | 2 | 721.8647  | 4.023 | 0.39  |
| 98 | IPI00215894 | 1 | 49.9 | 0.75 | 0.05 | 11 | 9  | KNG1 Isoform LMW of Kininogen-1 precursor      | n[145]AVDAALK[272]K[272]               | 2 | 624.4061  | 3.265 | 0.429 |
| 98 | IPI00215894 | 1 | 49.9 | 0.75 | 0.05 | 11 | 9  | KNG1 Isoform LMW of Kininogen-1 precursor      | n[145]DIPTNSPELEETLTHITK[272]          | 2 | 1214.1465 | 6.661 | 0.621 |
| 98 | IPI00215894 | 1 | 49.9 | 0.75 | 0.05 | 11 | 9  | KNG1 Isoform LMW of Kininogen-1 precursor      | n[145]IASFSQNCDIYPGK[272]              | 2 | 938.9624  | 4.537 | 0.539 |
| 98 | IPI00215894 | 1 | 49.9 | 0.75 | 0.05 | 11 | 9  | KNG1 Isoform LMW of Kininogen-1 precursor      | n[145]I GEI K[272]EETTSHLR             | 2 | 901.0066  | 4.58  | 0.405 |
| 98 | IPI00215894 | 1 | 49.9 | 0.75 | 0.05 | 11 | 9  | KNG1 Isoform LMW of Kininogen-1 precursor      | n[145]TVGSDTFYSFK[272]                 | 2 | 770.4003  | 3.883 | 0.422 |
| 98 | IPI00215894 | 1 | 49.9 | 0.75 | 0.05 | 11 | 9  | KNG1 Isoform LMW of Kininogen-1 precursor      | n[145]YNSQNQSNNQFVLYR                  | 2 | 1009.9937 | 6.31  | 0.461 |
| 98 | IPI00215894 | 1 | 49.9 | 0.75 | 0.05 | 11 | 9  | KNG1 Isoform LMW of Kininogen-1 precursor      | DIPTNSPELEETLTHITK                     | 3 | 807.0954  | 3.436 | 0.161 |
| 98 | IPI00215894 | 1 | 49.9 | 0.75 | 0.05 | 11 | 9  | KNG1 Isoform LMW of Kininogen-1 precursor      | KYFIDFVAR                              | 3 | 480.2784  | 4.364 | 0.354 |
| 98 | IPI00215894 | 1 | 49.9 | 0.75 | 0.05 | 11 | 9  | KNG1 Isoform LMW of Kininogen-1 precursor      | KYNSQNQSNNQFVLYR                       | 3 | 761.7258  | 4.334 | 0.45  |
| 98 | IPI00215894 | 1 | 49.9 | 0.75 | 0.05 | 11 | 9  | KNG1 Isoform LMW of Kininogen-1 precursor      | n[145]DIPTNSPELEETLTHITK[272]          | 3 | 809.7668  | 2.435 | 0.122 |
| 98 | IPI00215894 | 1 | 49.9 | 0.75 | 0.05 | 11 | 9  | KNG1 Isoform LMW of Kininogen-1 precursor      | AVDAALKK                               | 3 | 412.5994  | 2.374 | 0.342 |
| 98 | IPI00215894 | 1 | 49.9 | 0.75 | 0.05 | 11 | 9  | KNG1 Isoform LMW of Kininogen-1 precursor      | I GEI KEETTSHLR                        | 3 | 598.3354  | 3.577 | 0.374 |
| 98 | IPI00215894 | 1 | 49.9 | 0.75 | 0.05 | 11 | 9  | KNG1 Isoform LMW of Kininogen-1 precursor      | n[145]AVDAALK[272]K[272]               | 3 | 416.6065  | 2.264 | 0.345 |
| 98 | IPI00215894 | 1 | 49.9 | 0.75 | 0.05 | 11 | 9  | KNG1 Isoform LMW of Kininogen-1 precursor      | n[145]IASFSQNCDIYPGK[272]DFVQPPTK[272] | 3 | 978.5016  | 4.255 | 0.387 |
| 98 | IPI00215894 | 1 | 49.9 | 0.75 | 0.05 | 11 | 9  | KNG1 Isoform LMW of Kininogen-1 precursor      | n[145]VQVVAGK[272]K[272]               | 3 | 420.9503  | 2.485 | 0.327 |
| 98 | IPI00215894 | 1 | 49.9 | 0.75 | 0.05 | 11 | 9  | KNG1 Isoform LMW of Kininogen-1 precursor      | n[145]IASFSQNCDIYPGK[272]DFVQPPTK[272] | 4 | 734.128   | 3.901 | 0.397 |
| 98 | IPI00215894 | 1 | 49.9 | 0.75 | 0.05 | 11 | 9  | KNG1 Isoform LMW of Kininogen-1 precursor      | n[145]VQVVAGK[272]K[272]               | 2 | 630.9219  | 2.949 | 0.454 |
| 98 | IPI00215894 | 1 | 49.9 | 0.75 | 0.05 | 11 | 9  | KNG1 Isoform LMW of Kininogen-1 precursor      | TVGSDTFYSFKYEIK                        | 3 | 735.7246  | 3.593 | 0.356 |
| 98 | IPI00215894 | 1 | 49.9 | 0.75 | 0.05 | 11 | 9  | KNG1 Isoform LMW of Kininogen-1 precursor      | VQVVAGKK                               | 3 | 416.9432  | 2.217 | 0.31  |
| 98 | IPI00215894 | 1 | 49.9 | 0.75 | 0.05 | 11 | 9  | KNG1 Isoform LMW of Kininogen-1 precursor      | n[145]YNSQNQSNNQFVLYR                  | 3 | 673.6649  | 3.213 | 0.311 |
| 98 | IPI00215894 | 1 | 49.9 | 0.75 | 0.05 | 11 | 9  | KNG1 Isoform LMW of Kininogen-1 precursor      | TWQDCEYK                               | 2 | 699.8127  | 2.887 | 0.436 |
| 98 | IPI00215894 | 1 | 49.9 | 0.75 | 0.05 | 11 | 9  | KNG1 Isoform LMW of Kininogen-1 precursor      | n[145]EGDCPVQSGK[272]                  | 2 | 677.3227  | 2.709 | 0.264 |
| 98 | IPI00215894 | 1 | 49.9 | 0.75 | 0.05 | 11 | 9  | KNG1 Isoform LMW of Kininogen-1 precursor      | n[145]ENFLFLTPDCK[272]                 | 2 | 830.9195  | 3.004 | 0.385 |
| 98 | IPI00215894 | 1 | 49.9 | 0.75 | 0.05 | 11 | 9  | KNG1 Isoform LMW of Kininogen-1 precursor      | EGDCPVQSGK                             | 2 | 673.3156  | 2.229 | 0.245 |
| 98 | IPI00215894 | 1 | 49.9 | 0.75 | 0.05 | 11 | 9  | KNG1 Isoform LMW of Kininogen-1 precursor      | KYFIDFVAR                              | 2 | 719.9139  | 3.42  | 0.289 |
| 98 | IPI00215894 | 1 | 49.9 | 0.75 | 0.05 | 11 | 9  | KNG1 Isoform LMW of Kininogen-1 precursor      | n[145]I GEI K[272]EETTSHLR             | 4 | 451.0069  | 2.554 | 0.266 |
| 98 | IPI00215894 | 1 | 49.9 | 0.75 | 0.05 | 11 | 9  | KNG1 Isoform LMW of Kininogen-1 precursor      | VQVVAGKK                               | 2 | 624.9112  | 2.668 | 0.303 |
| 98 | IPI00215894 | 1 | 49.9 | 0.75 | 0.05 | 11 | 9  | KNG1 Isoform LMW of Kininogen-1 precursor      | n[145]YFIDFVAR                         | 2 | 587.8225  | 2.207 | 0.392 |
| 98 | IPI00215894 | 1 | 49.9 | 0.75 | 0.05 | 11 | 9  | KNG1 Isoform LMW of Kininogen-1 precursor      | DFVQPPTK                               | 2 | 606.3428  | 2.294 | 0.202 |

|     |             |   |      |      |      |    |    |                                           |                                                  |   |           |       |       |
|-----|-------------|---|------|------|------|----|----|-------------------------------------------|--------------------------------------------------|---|-----------|-------|-------|
| 98  | IPI00215894 | 1 | 49.9 | 0.75 | 0.05 | 11 | 9  | KNG1 Isoform LMW of Kininogen-1 precursor | VQVVAGK                                          | 2 | 490.8162  | 3.032 | 0.186 |
| 98  | IPI00215894 | 1 | 49.9 | 0.75 | 0.05 | 11 | 9  | KNG1 Isoform LMW of Kininogen-1 precursor | n[145]TWQDCEYK[272]                              | 2 | 703.8198  | 2.659 | 0.315 |
| 98  | IPI00215894 | 1 | 49.9 | 0.75 | 0.05 | 11 | 9  | KNG1 Isoform LMW of Kininogen-1 precursor | n[145]TVGSDTFYSFK[272]YEIK[272]                  | 3 | 739.7317  | 3.68  | 0.229 |
| 98  | IPI00215894 | 1 | 49.9 | 0.75 | 0.05 | 11 | 9  | KNG1 Isoform LMW of Kininogen-1 precursor | n[145]VQVVAGK[272]                               | 2 | 494.8233  | 2.593 | 0.178 |
| 98  | IPI00215894 | 1 | 49.9 | 0.75 | 0.05 | 11 | 9  | KNG1 Isoform LMW of Kininogen-1 precursor | n[145]AVDAALK[272]                               | 2 | 488.3075  | 2.198 | 0.188 |
| 98  | IPI00215894 | 1 | 49.9 | 0.75 | 0.05 | 11 | 9  | KNG1 Isoform LMW of Kininogen-1 precursor | n[145]JCVG CPR                                   | 2 | 492.2244  | 1.902 | 0.206 |
| 98  | IPI00215894 | 1 | 49.9 | 0.75 | 0.05 | 11 | 9  | KNG1 Isoform LMW of Kininogen-1 precursor | AVDAALK                                          | 2 | 484.3004  | 2.449 | 0.188 |
| 98  | IPI00215894 | 1 | 49.9 | 0.75 | 0.05 | 11 | 9  | KNG1 Isoform LMW of Kininogen-1 precursor | SCEYK                                            | 2 | 478.2225  | 1.952 | 0.216 |
| 98  | IPI00215894 | 1 | 49.9 | 0.75 | 0.05 | 11 | 9  | KNG1 Isoform LMW of Kininogen-1 precursor | n[145]DFVQPPTK[272]                              | 2 | 610.3499  | 2.114 | 0.137 |
| 98  | IPI00215894 | 1 | 49.9 | 0.75 | 0.05 | 11 | 9  | KNG1 Isoform LMW of Kininogen-1 precursor | n[145]QVVAGLNFR                                  | 2 | 574.3389  | 2.605 | 0.145 |
| 98  | IPI00215894 | 1 | 49.9 | 0.75 | 0.05 | 11 | 9  | KNG1 Isoform LMW of Kininogen-1 precursor | ITEATK                                           | 2 | 471.7846  | 1.741 | 0.035 |
| 98  | IPI00215894 | 1 | 49.9 | 0.75 | 0.05 | 11 | 9  | KNG1 Isoform LMW of Kininogen-1 precursor | n[145]ITEATK[272]                                | 2 | 475.7917  | 2.142 | 0.073 |
| 98  | IPI00215894 | 1 | 49.9 | 0.75 | 0.05 | 11 | 9  | KNG1 Isoform LMW of Kininogen-1 precursor | AVDAALKK                                         | 2 | 618.3954  | 1.972 | 0.143 |
| 98  | IPI00215894 | 1 | 49.9 | 0.75 | 0.05 | 11 | 9  | KNG1 Isoform LMW of Kininogen-1 precursor | n[145]ETTCSK[272]                                | 2 | 501.7456  | 1.891 | 0.168 |
| 98  | IPI00215894 | 1 | 49.9 | 0.75 | 0.05 | 11 | 9  | KNG1 Isoform LMW of Kininogen-1 precursor | n[145]SCEYK[272]                                 | 2 | 482.2296  | 1.745 | 0.166 |
| 98  | IPI00215894 | 1 | 49.9 | 0.75 | 0.05 | 11 | 9  | KNG1 Isoform LMW of Kininogen-1 precursor | IDNVKK                                           | 2 | 568.8612  | 2.026 | 0.076 |
| 98  | IPI00215894 | 1 | 49.9 | 0.75 | 0.05 | 11 | 9  | KNG1 Isoform LMW of Kininogen-1 precursor | n[145]IGEIK[272]EETTSHLR                         | 3 | 601.0068  | 3.42  | 0.122 |
| 98  | IPI00215894 | 1 | 49.9 | 0.75 | 0.05 | 11 | 9  | KNG1 Isoform LMW of Kininogen-1 precursor | IDNVK                                            | 2 | 434.7662  | 1.944 | 0.066 |
| 98  | IPI00215894 | 1 | 49.9 | 0.75 | 0.05 | 11 | 9  | KNG1 Isoform LMW of Kininogen-1 precursor | YEIEGDCPVQSGK                                    | 3 | 673.6728  | 2.449 | 0.181 |
| 98  | IPI00215894 | 1 | 49.9 | 0.75 | 0.05 | 11 | 9  | KNG1 Isoform LMW of Kininogen-1 precursor | n[145]SDTFYSFK[272]                              | 2 | 641.8316  | 3.152 | 0.331 |
| 98  | IPI00215894 | 1 | 49.9 | 0.75 | 0.05 | 11 | 9  | KNG1 Isoform LMW of Kininogen-1 precursor | n[145]FIDFVAR                                    | 2 | 506.2908  | 2.415 | 0.089 |
| 98  | IPI00215894 | 1 | 49.9 | 0.75 | 0.05 | 11 | 9  | KNG1 Isoform LMW of Kininogen-1 precursor | TVGSDTFYSFK                                      | 3 | 511.2646  | 2.527 | 0.079 |
| 98  | IPI00215894 | 1 | 49.9 | 0.75 | 0.05 | 11 | 9  | KNG1 Isoform LMW of Kininogen-1 precursor | n[145]CQPLGM[147]ISLM[147]K[272]                 | 2 | 793.9045  | 3.027 | 0.286 |
| 98  | IPI00215894 | 1 | 49.9 | 0.75 | 0.05 | 11 | 9  | KNG1 Isoform LMW of Kininogen-1 precursor | n[145]IYPTVNCQPLGM[147]                          | 2 | 771.3678  | 2.928 | 0.33  |
| 98  | IPI00215894 | 1 | 49.9 | 0.75 | 0.05 | 11 | 9  | KNG1 Isoform LMW of Kininogen-1 precursor | CQPLGM[147]ISLM[147]K                            | 2 | 789.8974  | 2.869 | 0.234 |
| 98  | IPI00215894 | 1 | 49.9 | 0.75 | 0.05 | 11 | 9  | KNG1 Isoform LMW of Kininogen-1 precursor | n[145]IYPTVNCQPLGM                               | 2 | 763.3703  | 2.776 | 0.138 |
| 98  | IPI00215894 | 1 | 49.9 | 0.75 | 0.05 | 11 | 9  | KNG1 Isoform LMW of Kininogen-1 precursor | IYPTVN                                           | 1 | 846.472   | 1.7   | 0.123 |
| 98  | IPI00215894 | 1 | 49.9 | 0.75 | 0.05 | 11 | 9  | KNG1 Isoform LMW of Kininogen-1 precursor | n[145]RPPGFSPF                                   | 2 | 524.7885  | 1.56  | 0.098 |
| 99  | IPI00215983 | 1 | 27.7 | 0.9  | 0.04 | 5  | 4  | CA1 Carbonic anhydrase 1                  | SLLSNVEGDNAVPM[147]QHNNRPTQPLK                   | 4 | 764.649   | 2.651 | 0.295 |
| 99  | IPI00215983 | 1 | 27.7 | 0.9  | 0.04 | 5  | 4  | CA1 Carbonic anhydrase 1                  | VLDAALQAIK                                       | 2 | 625.8952  | 3.281 | 0.217 |
| 99  | IPI00215983 | 1 | 27.7 | 0.9  | 0.04 | 5  | 4  | CA1 Carbonic anhydrase 1                  | n[145]VGEANPK[272]                               | 2 | 501.7948  | 2.24  | 0.09  |
| 99  | IPI00215983 | 1 | 27.7 | 0.9  | 0.04 | 5  | 4  | CA1 Carbonic anhydrase 1                  | n[145]VLDAALQAIK[272]                            | 2 | 629.9023  | 1.944 | 0.055 |
| 100 | IPI00218413 | 1 | 12.3 | 1.27 | 0.52 | 7  | 7  | BTD biotinidase precursor                 | n[145]LSSGLVTAALYGR                              | 2 | 726.4206  | 4.57  | 0.512 |
| 100 | IPI00218413 | 1 | 12.3 | 1.27 | 0.52 | 7  | 7  | BTD biotinidase precursor                 | DAQEVHCDEATK                                     | 3 | 557.9204  | 3.077 | 0.325 |
| 100 | IPI00218413 | 1 | 12.3 | 1.27 | 0.52 | 7  | 7  | BTD biotinidase precursor                 | n[145]WNPCLPHR                                   | 3 | 447.8819  | 3.386 | 0.237 |
| 100 | IPI00218413 | 1 | 12.3 | 1.27 | 0.52 | 7  | 7  | BTD biotinidase precursor                 | n[145]ILSGDPYCEK[272]                            | 2 | 729.8642  | 2.495 | 0.223 |
| 100 | IPI00218413 | 1 | 12.3 | 1.27 | 0.52 | 7  | 7  | BTD biotinidase precursor                 | n[145]VDLITFDTPFAGR                              | 2 | 798.4311  | 2.894 | 0.335 |
| 100 | IPI00218413 | 1 | 12.3 | 1.27 | 0.52 | 7  | 7  | BTD biotinidase precursor                 | n[145]DAQEVHCDEATK[272]                          | 3 | 560.5918  | 2.377 | 0.008 |
| 100 | IPI00218413 | 1 | 12.3 | 1.27 | 0.52 | 7  | 7  | BTD biotinidase precursor                 | MAHAHIQGGGR                                      | 3 | 406.5489  | 1.688 | 0.04  |
| 101 | IPI00218732 | 1 | 31.8 | 0.84 | 0.05 | 24 | 22 | PON1 Serum paraoxonase/arylesterase 1     | IFFYDSENPPASEVLR                                 | 2 | 1012.5098 | 5.019 | 0.548 |
| 101 | IPI00218732 | 1 | 31.8 | 0.84 | 0.05 | 24 | 22 | PON1 Serum paraoxonase/arylesterase 1     | YVYIAELLAHK                                      | 2 | 800.4665  | 4.607 | 0.39  |
| 101 | IPI00218732 | 1 | 31.8 | 0.84 | 0.05 | 24 | 22 | PON1 Serum paraoxonase/arylesterase 1     | n[145]IFFYDSENPPASEVLR                           | 2 | 1014.5134 | 4.572 | 0.542 |
| 101 | IPI00218732 | 1 | 31.8 | 0.84 | 0.05 | 24 | 22 | PON1 Serum paraoxonase/arylesterase 1     | n[145]YVYIAELLAHK[272]                           | 2 | 804.4736  | 4.643 | 0.398 |
| 101 | IPI00218732 | 1 | 31.8 | 0.84 | 0.05 | 24 | 22 | PON1 Serum paraoxonase/arylesterase 1     | YVYIAELLAHK                                      | 3 | 533.9801  | 4.57  | 0.321 |
| 101 | IPI00218732 | 1 | 31.8 | 0.84 | 0.05 | 24 | 22 | PON1 Serum paraoxonase/arylesterase 1     | n[145]YVYIAELLAHK[272]                           | 3 | 536.6515  | 2.808 | 0.224 |
| 101 | IPI00218732 | 1 | 31.8 | 0.84 | 0.05 | 24 | 22 | PON1 Serum paraoxonase/arylesterase 1     | FDVSSFNPHGISTFTDEDNAM[147]YLLVVNHPDAK            | 4 | 969.9689  | 7.797 | 0.629 |
| 101 | IPI00218732 | 1 | 31.8 | 0.84 | 0.05 | 24 | 22 | PON1 Serum paraoxonase/arylesterase 1     | n[145]FDVSSFNPHGISTFTDEDNAM[147]YLLVVNHPDAK[272] | 4 | 967.9737  | 5.491 | 0.433 |
| 101 | IPI00218732 | 1 | 31.8 | 0.84 | 0.05 | 24 | 22 | PON1 Serum paraoxonase/arylesterase 1     | SFNPNSPGK                                        | 2 | 614.3277  | 2.94  | 0.338 |

|     |             |   |      |      |      |    |    |                                       |                                    |   |           |       |       |
|-----|-------------|---|------|------|------|----|----|---------------------------------------|------------------------------------|---|-----------|-------|-------|
| 101 | IPI00218732 | 1 | 31.8 | 0.84 | 0.05 | 24 | 22 | PON1 Serum paraoxonase/arylesterase 1 | n[145]SFNPNSPGK[272]               | 2 | 618.3348  | 2.559 | 0.269 |
| 101 | IPI00218732 | 1 | 31.8 | 0.84 | 0.05 | 24 | 22 | PON1 Serum paraoxonase/arylesterase 1 | n[145]EVQPVELPNCNLVK[272]          | 2 | 958.5148  | 2.628 | 0.246 |
| 101 | IPI00218732 | 1 | 31.8 | 0.84 | 0.05 | 24 | 22 | PON1 Serum paraoxonase/arylesterase 1 | n[145]IHVYEK[272]                  | 2 | 538.8208  | 1.819 | 0.208 |
| 101 | IPI00218732 | 1 | 31.8 | 0.84 | 0.05 | 24 | 22 | PON1 Serum paraoxonase/arylesterase 1 | n[145]IHVYEK[272]                  | 3 | 359.5496  | 2.144 | 0.117 |
| 101 | IPI00218732 | 1 | 31.8 | 0.84 | 0.05 | 24 | 22 | PON1 Serum paraoxonase/arylesterase 1 | LLIGTVFHK                          | 3 | 436.6115  | 3.294 | 0.264 |
| 101 | IPI00218732 | 1 | 31.8 | 0.84 | 0.05 | 24 | 22 | PON1 Serum paraoxonase/arylesterase 1 | IQNILTEEPK                         | 2 | 732.9247  | 1.463 | 0.273 |
| 101 | IPI00218732 | 1 | 31.8 | 0.84 | 0.05 | 24 | 22 | PON1 Serum paraoxonase/arylesterase 1 | n[145]STVEIFK[272]                 | 2 | 556.3337  | 2.331 | 0.232 |
| 101 | IPI00218732 | 1 | 31.8 | 0.84 | 0.05 | 24 | 22 | PON1 Serum paraoxonase/arylesterase 1 | STVEIFK                            | 2 | 552.3266  | 1.676 | 0.141 |
| 101 | IPI00218732 | 1 | 31.8 | 0.84 | 0.05 | 24 | 22 | PON1 Serum paraoxonase/arylesterase 1 | ALYCEL                             | 1 | 897.4209  | 1.455 | 0.132 |
| 101 | IPI00218732 | 1 | 31.8 | 0.84 | 0.05 | 24 | 22 | PON1 Serum paraoxonase/arylesterase 1 | EVQPVELPNCNLVK                     | 2 | 954.5077  | 2.232 | 0.061 |
| 101 | IPI00218732 | 1 | 31.8 | 0.84 | 0.05 | 24 | 22 | PON1 Serum paraoxonase/arylesterase 1 | IHVYEK                             | 2 | 534.8137  | 1.466 | 0.063 |
| 101 | IPI00218732 | 1 | 31.8 | 0.84 | 0.05 | 24 | 22 | PON1 Serum paraoxonase/arylesterase 1 | n[145]YVYIAELLAH                   | 2 | 668.3751  | 3.166 | 0.437 |
| 101 | IPI00218732 | 1 | 31.8 | 0.84 | 0.05 | 24 | 22 | PON1 Serum paraoxonase/arylesterase 1 | n[145]ALYCEL                       | 1 | 901.428   | 1.189 | 0.139 |
| 101 | IPI00218732 | 1 | 31.8 | 0.84 | 0.05 | 24 | 22 | PON1 Serum paraoxonase/arylesterase 1 | FDVSSFNPH                          | 2 | 595.2855  | 1.588 | 0.145 |
| 102 | IPI00242956 | 1 | 2.4  | 0.6  | 0.22 | 9  | 7  | FCGBP IgGFc-binding protein precursor | n[145]GSQAVSYTR                    | 2 | 556.7945  | 2.971 | 0.356 |
| 102 | IPI00242956 | 1 | 2.4  | 0.6  | 0.22 | 9  | 7  | FCGBP IgGFc-binding protein precursor | n[145]LTYNHGGITGSR                 | 3 | 473.9202  | 2.237 | 0.196 |
| 102 | IPI00242956 | 1 | 2.4  | 0.6  | 0.22 | 9  | 7  | FCGBP IgGFc-binding protein precursor | n[145]AYSHSVSLTR                   | 2 | 632.842   | 2.832 | 0.235 |
| 102 | IPI00242956 | 1 | 2.4  | 0.6  | 0.22 | 9  | 7  | FCGBP IgGFc-binding protein precursor | GSQAVSYTR                          | 2 | 554.7909  | 2.618 | 0.214 |
| 102 | IPI00242956 | 1 | 2.4  | 0.6  | 0.22 | 9  | 7  | FCGBP IgGFc-binding protein precursor | n[145]GNPAVSIVR                    | 2 | 553.8074  | 2.663 | 0.118 |
| 102 | IPI00242956 | 1 | 2.4  | 0.6  | 0.22 | 9  | 7  | FCGBP IgGFc-binding protein precursor | n[145]VLVENEHR                     | 2 | 570.3181  | 2.034 | 0.078 |
| 102 | IPI00242956 | 1 | 2.4  | 0.6  | 0.22 | 9  | 7  | FCGBP IgGFc-binding protein precursor | n[145]VLVENEHR                     | 3 | 380.5478  | 1.419 | 0.194 |
| 102 | IPI00242956 | 1 | 2.4  | 0.6  | 0.22 | 9  | 7  | FCGBP IgGFc-binding protein precursor | n[145]YHGAVCGLCGNM[147]DR          | 3 | 583.2369  | 2.129 | 0.086 |
| 102 | IPI00242956 | 1 | 2.4  | 0.6  | 0.22 | 9  | 7  | FCGBP IgGFc-binding protein precursor | SK[272]K[272]                      | 2 | 395.7731  | 0.913 | 0.136 |
| 103 | IPI00291262 | 1 | 44.2 | 0.69 | 0.12 | 79 | 51 | CLU Clusterin precursor               | DQTVSDNELQEMSNQGSK                 | 2 | 1145.5345 | 5.66  | 0.51  |
| 103 | IPI00291262 | 1 | 44.2 | 0.69 | 0.12 | 79 | 51 | CLU Clusterin precursor               | DQTVSDNELQEM[147]SNQGSK            | 2 | 1153.5319 | 5.142 | 0.501 |
| 103 | IPI00291262 | 1 | 44.2 | 0.69 | 0.12 | 79 | 51 | CLU Clusterin precursor               | EILSVDCTNNPSQAK                    | 2 | 1016.4956 | 5.604 | 0.538 |
| 103 | IPI00291262 | 1 | 44.2 | 0.69 | 0.12 | 79 | 51 | CLU Clusterin precursor               | KTLLSNLEEAK                        | 2 | 833.4986  | 4.029 | 0.392 |
| 103 | IPI00291262 | 1 | 44.2 | 0.69 | 0.12 | 79 | 51 | CLU Clusterin precursor               | VTTVASHTSDSDVPSGVTEVVVK            | 2 | 1297.6873 | 6.806 | 0.599 |
| 103 | IPI00291262 | 1 | 44.2 | 0.69 | 0.12 | 79 | 51 | CLU Clusterin precursor               | n[145]DQTVSDNELQEM[147]SNQGSK[272] | 2 | 1157.539  | 5.163 | 0.588 |
| 103 | IPI00291262 | 1 | 44.2 | 0.69 | 0.12 | 79 | 51 | CLU Clusterin precursor               | n[145]EILSVDCTNNPSQAK[272]         | 2 | 1020.5027 | 4.618 | 0.508 |
| 103 | IPI00291262 | 1 | 44.2 | 0.69 | 0.12 | 79 | 51 | CLU Clusterin precursor               | n[145]TLLSNLEEAK[272]K[272]        | 2 | 839.5092  | 4.364 | 0.385 |
| 103 | IPI00291262 | 1 | 44.2 | 0.69 | 0.12 | 79 | 51 | CLU Clusterin precursor               | n[145]VTTVASHTSDSD                 | 2 | 682.3265  | 3.669 | 0.467 |
| 103 | IPI00291262 | 1 | 44.2 | 0.69 | 0.12 | 79 | 51 | CLU Clusterin precursor               | DQTVSDNELQEM[147]SNQGSK            | 3 | 769.357   | 4.767 | 0.467 |
| 103 | IPI00291262 | 1 | 44.2 | 0.69 | 0.12 | 79 | 51 | CLU Clusterin precursor               | KTLLSNLEEAKK                       | 3 | 645.3981  | 4.193 | 0.422 |
| 103 | IPI00291262 | 1 | 44.2 | 0.69 | 0.12 | 79 | 51 | CLU Clusterin precursor               | VTTVASHTSDSDVPSGVTEVVVK            | 3 | 865.4606  | 4.914 | 0.479 |
| 103 | IPI00291262 | 1 | 44.2 | 0.69 | 0.12 | 79 | 51 | CLU Clusterin precursor               | n[145]QQTHMLDVMQDHFSR              | 3 | 672.9882  | 4.59  | 0.433 |
| 103 | IPI00291262 | 1 | 44.2 | 0.69 | 0.12 | 79 | 51 | CLU Clusterin precursor               | n[145]QQTHM[147]LDVMQDHFSR         | 3 | 678.3198  | 4.939 | 0.275 |
| 103 | IPI00291262 | 1 | 44.2 | 0.69 | 0.12 | 79 | 51 | CLU Clusterin precursor               | n[145]QQTHM[147]LDVM[147]QDHFSR    | 3 | 683.6515  | 3.709 | 0.414 |
| 103 | IPI00291262 | 1 | 44.2 | 0.69 | 0.12 | 79 | 51 | CLU Clusterin precursor               | n[145]VTTVASHTSDSDVPSGVTEVVVK[272] | 3 | 868.132   | 4.574 | 0.488 |
| 103 | IPI00291262 | 1 | 44.2 | 0.69 | 0.12 | 79 | 51 | CLU Clusterin precursor               | KTLLSNLEEAKK                       | 4 | 484.3004  | 3.151 | 0.347 |
| 103 | IPI00291262 | 1 | 44.2 | 0.69 | 0.12 | 79 | 51 | CLU Clusterin precursor               | n[145]QQTHMLDVMQDHFSR              | 4 | 504.993   | 4.292 | 0.358 |
| 103 | IPI00291262 | 1 | 44.2 | 0.69 | 0.12 | 79 | 51 | CLU Clusterin precursor               | n[145]QQTHMLDVM[147]QDHFSR         | 4 | 508.9917  | 3.247 | 0.361 |
| 103 | IPI00291262 | 1 | 44.2 | 0.69 | 0.12 | 79 | 51 | CLU Clusterin precursor               | n[145]QQTHM[147]LDVMQDHFSR         | 4 | 508.9917  | 3.394 | 0.32  |
| 103 | IPI00291262 | 1 | 44.2 | 0.69 | 0.12 | 79 | 51 | CLU Clusterin precursor               | n[145]QQTHM[147]LDVM[147]QDHFSR    | 4 | 512.9904  | 2.705 | 0.213 |
| 103 | IPI00291262 | 1 | 44.2 | 0.69 | 0.12 | 79 | 51 | CLU Clusterin precursor               | KTLLSNLEEAK                        | 3 | 556.0015  | 1.993 | 0.243 |
| 103 | IPI00291262 | 1 | 44.2 | 0.69 | 0.12 | 79 | 51 | CLU Clusterin precursor               | n[145]TLLSNLEEAK[272]K[272]        | 3 | 560.0086  | 2.889 | 0.104 |
| 103 | IPI00291262 | 1 | 44.2 | 0.69 | 0.12 | 79 | 51 | CLU Clusterin precursor               | EIQNAVNGVK                         | 2 | 676.3883  | 3.816 | 0.318 |
| 103 | IPI00291262 | 1 | 44.2 | 0.69 | 0.12 | 79 | 51 | CLU Clusterin precursor               | TLLSNLEEAKK                        | 2 | 833.4986  | 3.873 | 0.388 |



|     |             |   |      |      |      |     |    |                                                 |                                    |   |           |       |       |
|-----|-------------|---|------|------|------|-----|----|-------------------------------------------------|------------------------------------|---|-----------|-------|-------|
| 103 | IPI00291262 | 1 | 44.2 | 0.69 | 0.12 | 79  | 51 | CLU Clusterin precursor                         | n[145]EIQNAVNGVK[272]              | 2 | 680.3954  | 3.429 | 0.234 |
| 103 | IPI00291262 | 1 | 44.2 | 0.69 | 0.12 | 79  | 51 | CLU Clusterin precursor                         | TLLSNLEEAKK                        | 3 | 556.0015  | 3.344 | 0.197 |
| 103 | IPI00291262 | 1 | 44.2 | 0.69 | 0.12 | 79  | 51 | CLU Clusterin precursor                         | n[145]RELDESQVAER                  | 3 | 530.2852  | 4.271 | 0.165 |
| 103 | IPI00291262 | 1 | 44.2 | 0.69 | 0.12 | 79  | 51 | CLU Clusterin precursor                         | n[145]ASSIIDELFQDR                 | 2 | 769.4026  | 2.99  | 0.286 |
| 103 | IPI00291262 | 1 | 44.2 | 0.69 | 0.12 | 79  | 51 | CLU Clusterin precursor                         | TLLSNLEEAK                         | 2 | 699.4036  | 1.73  | 0.087 |
| 103 | IPI00291262 | 1 | 44.2 | 0.69 | 0.12 | 79  | 51 | CLU Clusterin precursor                         | FM[147]ETVAEK                      | 2 | 625.8261  | 3.004 | 0.185 |
| 103 | IPI00291262 | 1 | 44.2 | 0.69 | 0.12 | 79  | 51 | CLU Clusterin precursor                         | n[145]ELDESQVAER                   | 2 | 716.8737  | 2.761 | 0.276 |
| 103 | IPI00291262 | 1 | 44.2 | 0.69 | 0.12 | 79  | 51 | CLU Clusterin precursor                         | n[145]LFSDSPITVTPVEVSR             | 2 | 1009.55   | 2.98  | 0.357 |
| 103 | IPI00291262 | 1 | 44.2 | 0.69 | 0.12 | 79  | 51 | CLU Clusterin precursor                         | KYNELLK                            | 2 | 664.4085  | 3.059 | 0.12  |
| 103 | IPI00291262 | 1 | 44.2 | 0.69 | 0.12 | 79  | 51 | CLU Clusterin precursor                         | n[145]FMETVAEK[272]                | 2 | 621.8358  | 2.821 | 0.182 |
| 103 | IPI00291262 | 1 | 44.2 | 0.69 | 0.12 | 79  | 51 | CLU Clusterin precursor                         | n[145]MLDVM[147]QDHFSR             | 3 | 513.5786  | 3.362 | 0.322 |
| 103 | IPI00291262 | 1 | 44.2 | 0.69 | 0.12 | 79  | 51 | CLU Clusterin precursor                         | n[145]TLLSNLEEAK[272]              | 2 | 703.4107  | 2.472 | 0.242 |
| 103 | IPI00291262 | 1 | 44.2 | 0.69 | 0.12 | 79  | 51 | CLU Clusterin precursor                         | KYNELLK                            | 3 | 443.2748  | 2.697 | 0.107 |
| 103 | IPI00291262 | 1 | 44.2 | 0.69 | 0.12 | 79  | 51 | CLU Clusterin precursor                         | ALQEYR                             | 2 | 460.2535  | 2.063 | 0.115 |
| 103 | IPI00291262 | 1 | 44.2 | 0.69 | 0.12 | 79  | 51 | CLU Clusterin precursor                         | n[145]FM[147]ETVAEK[272]           | 2 | 629.8332  | 2.556 | 0.102 |
| 103 | IPI00291262 | 1 | 44.2 | 0.69 | 0.12 | 79  | 51 | CLU Clusterin precursor                         | n[145]TLIEK[272]                   | 2 | 446.2913  | 2.044 | 0.245 |
| 103 | IPI00291262 | 1 | 44.2 | 0.69 | 0.12 | 79  | 51 | CLU Clusterin precursor                         | n[145]QQTHMLDVM[147]QDHFSR         | 3 | 678.3198  | 4.882 | 0.485 |
| 103 | IPI00291262 | 1 | 44.2 | 0.69 | 0.12 | 79  | 51 | CLU Clusterin precursor                         | n[145]MLDVMQDHFSR                  | 2 | 761.8668  | 4.239 | 0.315 |
| 103 | IPI00291262 | 1 | 44.2 | 0.69 | 0.12 | 79  | 51 | CLU Clusterin precursor                         | n[145]ALQEYR                       | 2 | 462.257   | 1.969 | 0.008 |
| 103 | IPI00291262 | 1 | 44.2 | 0.69 | 0.12 | 79  | 51 | CLU Clusterin precursor                         | n[145]ALQEYR                       | 1 | 923.5068  | 1.651 | 0.067 |
| 103 | IPI00291262 | 1 | 44.2 | 0.69 | 0.12 | 79  | 51 | CLU Clusterin precursor                         | n[145]PITVTPVEVSR                  | 2 | 720.9308  | 2.192 | 0.207 |
| 103 | IPI00291262 | 1 | 44.2 | 0.69 | 0.12 | 79  | 51 | CLU Clusterin precursor                         | n[145]IDSLLENDR                    | 2 | 609.826   | 3.181 | 0.208 |
| 103 | IPI00291262 | 1 | 44.2 | 0.69 | 0.12 | 79  | 51 | CLU Clusterin precursor                         | n[145]MK[272]DQCCK[272]            | 3 | 449.2261  | 1.988 | 0.135 |
| 103 | IPI00291262 | 1 | 44.2 | 0.69 | 0.12 | 79  | 51 | CLU Clusterin precursor                         | n[145]MLDVM[147]QDHFSR             | 2 | 769.8643  | 3.471 | 0.319 |
| 103 | IPI00291262 | 1 | 44.2 | 0.69 | 0.12 | 79  | 51 | CLU Clusterin precursor                         | EPQDQTYHYLPF                       | 2 | 775.3697  | 2.307 | 0.132 |
| 103 | IPI00291262 | 1 | 44.2 | 0.69 | 0.12 | 79  | 51 | CLU Clusterin precursor                         | KKEDALNETR                         | 3 | 541.9774  | 2.083 | 0.035 |
| 103 | IPI00291262 | 1 | 44.2 | 0.69 | 0.12 | 79  | 51 | CLU Clusterin precursor                         | MLDVM[147]QDHFSR                   | 3 | 512.2429  | 3.112 | 0.393 |
| 103 | IPI00291262 | 1 | 44.2 | 0.69 | 0.12 | 79  | 51 | CLU Clusterin precursor                         | n[145]EPQDQTYHYLPF                 | 2 | 777.3733  | 2.156 | 0.162 |
| 104 | IPI00291866 | 1 | 38.8 | 0.72 | 0.04 | 121 | 66 | SERPING1 Plasma protease C1 inhibitor precursor | DFTCVHQALK                         | 2 | 744.3785  | 4.451 | 0.391 |
| 104 | IPI00291866 | 1 | 38.8 | 0.72 | 0.04 | 121 | 66 | SERPING1 Plasma protease C1 inhibitor precursor | GVTSVSVQIFHSPDLAIR                 | 2 | 984.0391  | 5.33  | 0.519 |
| 104 | IPI00291866 | 1 | 38.8 | 0.72 | 0.04 | 121 | 66 | SERPING1 Plasma protease C1 inhibitor precursor | KYPVAHFIDQTLK                      | 2 | 990.5752  | 4.488 | 0.446 |
| 104 | IPI00291866 | 1 | 38.8 | 0.72 | 0.04 | 121 | 66 | SERPING1 Plasma protease C1 inhibitor precursor | LEDM[147]EQALSPSVFK                | 2 | 945.4875  | 3.779 | 0.493 |
| 104 | IPI00291866 | 1 | 38.8 | 0.72 | 0.04 | 121 | 66 | SERPING1 Plasma protease C1 inhibitor precursor | TNLESILSYPK                        | 2 | 772.9378  | 4.173 | 0.404 |
| 104 | IPI00291866 | 1 | 38.8 | 0.72 | 0.04 | 121 | 66 | SERPING1 Plasma protease C1 inhibitor precursor | VTTSQDM[147]LSIM[147]EK            | 2 | 897.9525  | 3.247 | 0.521 |
| 104 | IPI00291866 | 1 | 38.8 | 0.72 | 0.04 | 121 | 66 | SERPING1 Plasma protease C1 inhibitor precursor | n[145]DFTCVHQALK[272]              | 2 | 748.3856  | 4.016 | 0.452 |
| 104 | IPI00291866 | 1 | 38.8 | 0.72 | 0.04 | 121 | 66 | SERPING1 Plasma protease C1 inhibitor precursor | n[145]GVTSVSVQIFHSPDLAIR           | 2 | 986.0426  | 6.57  | 0.474 |
| 104 | IPI00291866 | 1 | 38.8 | 0.72 | 0.04 | 121 | 66 | SERPING1 Plasma protease C1 inhibitor precursor | n[145]HRLDMEQALSPSVFK[272]         | 2 | 1088.0772 | 4.343 | 0.434 |
| 104 | IPI00291866 | 1 | 38.8 | 0.72 | 0.04 | 121 | 66 | SERPING1 Plasma protease C1 inhibitor precursor | n[145]LEDM[147]EQALSPSVFK[272]     | 2 | 949.4946  | 4.166 | 0.458 |
| 104 | IPI00291866 | 1 | 38.8 | 0.72 | 0.04 | 121 | 66 | SERPING1 Plasma protease C1 inhibitor precursor | n[145]LVLLNAIYLSAK[272]            | 2 | 803.5128  | 4.498 | 0.371 |
| 104 | IPI00291866 | 1 | 38.8 | 0.72 | 0.04 | 121 | 66 | SERPING1 Plasma protease C1 inhibitor precursor | n[145]TNLESILSYPK[272]             | 2 | 776.9449  | 3.977 | 0.396 |
| 104 | IPI00291866 | 1 | 38.8 | 0.72 | 0.04 | 121 | 66 | SERPING1 Plasma protease C1 inhibitor precursor | n[145]VTTSQDMLSIM[272]             | 2 | 885.9647  | 4.802 | 0.339 |
| 104 | IPI00291866 | 1 | 38.8 | 0.72 | 0.04 | 121 | 66 | SERPING1 Plasma protease C1 inhibitor precursor | n[145]VTTSQDM[147]LSIM[147]EK[272] | 2 | 901.9596  | 4.542 | 0.464 |
| 104 | IPI00291866 | 1 | 38.8 | 0.72 | 0.04 | 121 | 66 | SERPING1 Plasma protease C1 inhibitor precursor | n[145]YYPVAHFIDQTLK[272]           | 2 | 860.4873  | 4.26  | 0.388 |
| 104 | IPI00291866 | 1 | 38.8 | 0.72 | 0.04 | 121 | 66 | SERPING1 Plasma protease C1 inhibitor precursor | DFTCVHQALK                         | 3 | 496.5881  | 3.464 | 0.354 |
| 104 | IPI00291866 | 1 | 38.8 | 0.72 | 0.04 | 121 | 66 | SERPING1 Plasma protease C1 inhibitor precursor | HRLDLM[147]EQALSPSVFK              | 3 | 728.3808  | 3.961 | 0.403 |
| 104 | IPI00291866 | 1 | 38.8 | 0.72 | 0.04 | 121 | 66 | SERPING1 Plasma protease C1 inhibitor precursor | KYPVAHFIDQTLK                      | 3 | 660.7192  | 4.96  | 0.417 |
| 104 | IPI00291866 | 1 | 38.8 | 0.72 | 0.04 | 121 | 66 | SERPING1 Plasma protease C1 inhibitor precursor | n[145]DFTCVHQALK[272]              | 3 | 499.2595  | 3.832 | 0.318 |
| 104 | IPI00291866 | 1 | 38.8 | 0.72 | 0.04 | 121 | 66 | SERPING1 Plasma protease C1 inhibitor precursor | n[145]GVTSVSVQIFHSPDLAIR           | 3 | 657.6975  | 4.517 | 0.396 |

|     |             |   |      |      |      |     |    |                                                 |                                   |   |          |       |       |
|-----|-------------|---|------|------|------|-----|----|-------------------------------------------------|-----------------------------------|---|----------|-------|-------|
| 104 | IPI00291866 | 1 | 38.8 | 0.72 | 0.04 | 121 | 66 | SERPING1 Plasma protease C1 inhibitor precursor | n[145]HRLLEDMEQALSPSVFK[272]      | 3 | 725.7205 | 4.444 | 0.464 |
| 104 | IPI00291866 | 1 | 38.8 | 0.72 | 0.04 | 121 | 66 | SERPING1 Plasma protease C1 inhibitor precursor | YPVAHFIDQTLK                      | 3 | 571.3225 | 3.311 | 0.292 |
| 104 | IPI00291866 | 1 | 38.8 | 0.72 | 0.04 | 121 | 66 | SERPING1 Plasma protease C1 inhibitor precursor | n[145]HRLLEDM[147]EQALSPSVFK[272] | 3 | 731.0522 | 5.308 | 0.298 |
| 104 | IPI00291866 | 1 | 38.8 | 0.72 | 0.04 | 121 | 66 | SERPING1 Plasma protease C1 inhibitor precursor | n[145]YPVAHFIDQTLK[272]           | 3 | 573.9939 | 3.345 | 0.241 |
| 104 | IPI00291866 | 1 | 38.8 | 0.72 | 0.04 | 121 | 66 | SERPING1 Plasma protease C1 inhibitor precursor | VTTSQDMLSIMEK                     | 2 | 881.9576 | 3.847 | 0.333 |
| 104 | IPI00291866 | 1 | 38.8 | 0.72 | 0.04 | 121 | 66 | SERPING1 Plasma protease C1 inhibitor precursor | n[145]LEDMEQALSPSVFK[272]         | 2 | 941.4972 | 3.48  | 0.44  |
| 104 | IPI00291866 | 1 | 38.8 | 0.72 | 0.04 | 121 | 66 | SERPING1 Plasma protease C1 inhibitor precursor | n[145]FQPTLLTLPR                  | 2 | 665.4042 | 1.471 | 0.113 |
| 104 | IPI00291866 | 1 | 38.8 | 0.72 | 0.04 | 121 | 66 | SERPING1 Plasma protease C1 inhibitor precursor | HRLLEDMEQALSPSVFK                 | 3 | 723.0491 | 3.727 | 0.27  |
| 104 | IPI00291866 | 1 | 38.8 | 0.72 | 0.04 | 121 | 66 | SERPING1 Plasma protease C1 inhibitor precursor | n[145]LFVLWDQQHK[272]             | 3 | 534.6396 | 4.289 | 0.325 |
| 104 | IPI00291866 | 1 | 38.8 | 0.72 | 0.04 | 121 | 66 | SERPING1 Plasma protease C1 inhibitor precursor | n[145]VTTSQDMLSIM[147]EK[272]     | 3 | 596.3105 | 3.34  | 0.226 |
| 104 | IPI00291866 | 1 | 38.8 | 0.72 | 0.04 | 121 | 66 | SERPING1 Plasma protease C1 inhibitor precursor | LEDMEQALSPSVFK                    | 2 | 937.4901 | 3.863 | 0.278 |
| 104 | IPI00291866 | 1 | 38.8 | 0.72 | 0.04 | 121 | 66 | SERPING1 Plasma protease C1 inhibitor precursor | LYHAFSAM[147]K                    | 2 | 682.3632 | 3.307 | 0.261 |
| 104 | IPI00291866 | 1 | 38.8 | 0.72 | 0.04 | 121 | 66 | SERPING1 Plasma protease C1 inhibitor precursor | n[145]LYHAFSAM[147]K[272]         | 2 | 686.3703 | 2.981 | 0.278 |
| 104 | IPI00291866 | 1 | 38.8 | 0.72 | 0.04 | 121 | 66 | SERPING1 Plasma protease C1 inhibitor precursor | n[145]VATTVISK[272]               | 2 | 553.8548 | 1.538 | 0.156 |
| 104 | IPI00291866 | 1 | 38.8 | 0.72 | 0.04 | 121 | 66 | SERPING1 Plasma protease C1 inhibitor precursor | LYHAFSAM[147]K                    | 3 | 455.2446 | 3.067 | 0.167 |
| 104 | IPI00291866 | 1 | 38.8 | 0.72 | 0.04 | 121 | 66 | SERPING1 Plasma protease C1 inhibitor precursor | NSVIKVP[147]M[147]NSK             | 3 | 600.6672 | 2.678 | 0.308 |
| 104 | IPI00291866 | 1 | 38.8 | 0.72 | 0.04 | 121 | 66 | SERPING1 Plasma protease C1 inhibitor precursor | LVLLNAIYLSAK                      | 2 | 799.5057 | 2.988 | 0.437 |
| 104 | IPI00291866 | 1 | 38.8 | 0.72 | 0.04 | 121 | 66 | SERPING1 Plasma protease C1 inhibitor precursor | M[147]EPFHFK                      | 2 | 616.3183 | 2.48  | 0.207 |
| 104 | IPI00291866 | 1 | 38.8 | 0.72 | 0.04 | 121 | 66 | SERPING1 Plasma protease C1 inhibitor precursor | YPVAHFIDQTLK                      | 2 | 856.4802 | 3.807 | 0.405 |
| 104 | IPI00291866 | 1 | 38.8 | 0.72 | 0.04 | 121 | 66 | SERPING1 Plasma protease C1 inhibitor precursor | n[145]LYHAFSAM[147]K[272]         | 3 | 457.916  | 3.176 | 0.133 |
| 104 | IPI00291866 | 1 | 38.8 | 0.72 | 0.04 | 121 | 66 | SERPING1 Plasma protease C1 inhibitor precursor | KYPVAHFIDQTLK                     | 4 | 495.7912 | 3.276 | 0.152 |
| 104 | IPI00291866 | 1 | 38.8 | 0.72 | 0.04 | 121 | 66 | SERPING1 Plasma protease C1 inhibitor precursor | VATTVISK                          | 2 | 549.8477 | 2.268 | 0.218 |
| 104 | IPI00291866 | 1 | 38.8 | 0.72 | 0.04 | 121 | 66 | SERPING1 Plasma protease C1 inhibitor precursor | n[145]TNLESILSYPK[272]            | 3 | 518.299  | 2.049 | 0.048 |
| 104 | IPI00291866 | 1 | 38.8 | 0.72 | 0.04 | 121 | 66 | SERPING1 Plasma protease C1 inhibitor precursor | n[145]LLDSLPSDTR                  | 2 | 630.8495 | 2.643 | 0.215 |
| 104 | IPI00291866 | 1 | 38.8 | 0.72 | 0.04 | 121 | 66 | SERPING1 Plasma protease C1 inhibitor precursor | KYPVAH                            | 3 | 332.1993 | 2.413 | 0.342 |
| 104 | IPI00291866 | 1 | 38.8 | 0.72 | 0.04 | 121 | 66 | SERPING1 Plasma protease C1 inhibitor precursor | n[145]VTTSQDM[147]LSIMEK[272]     | 2 | 893.9621 | 4.029 | 0.396 |
| 104 | IPI00291866 | 1 | 38.8 | 0.72 | 0.04 | 121 | 66 | SERPING1 Plasma protease C1 inhibitor precursor | n[145]TLYSSSPR                    | 2 | 527.7861 | 2.089 | 0.113 |
| 104 | IPI00291866 | 1 | 38.8 | 0.72 | 0.04 | 121 | 66 | SERPING1 Plasma protease C1 inhibitor precursor | n[145]TLYSSSPR                    | 1 | 1054.565 | 1.959 | 0.115 |
| 104 | IPI00291866 | 1 | 38.8 | 0.72 | 0.04 | 121 | 66 | SERPING1 Plasma protease C1 inhibitor precursor | VTTSQDMLSIM[147]EK                | 2 | 889.955  | 4.332 | 0.505 |
| 104 | IPI00291866 | 1 | 38.8 | 0.72 | 0.04 | 121 | 66 | SERPING1 Plasma protease C1 inhibitor precursor | GVTSVSVQIFHSPDLAIR                | 3 | 656.3618 | 4.028 | 0.178 |
| 104 | IPI00291866 | 1 | 38.8 | 0.72 | 0.04 | 121 | 66 | SERPING1 Plasma protease C1 inhibitor precursor | n[145]AIMEK[272]                  | 2 | 440.2643 | 2.159 | 0.176 |
| 104 | IPI00291866 | 1 | 38.8 | 0.72 | 0.04 | 121 | 66 | SERPING1 Plasma protease C1 inhibitor precursor | n[145]MEPFHFK[272]                | 3 | 408.5544 | 2.373 | 0.093 |
| 104 | IPI00291866 | 1 | 38.8 | 0.72 | 0.04 | 121 | 66 | SERPING1 Plasma protease C1 inhibitor precursor | n[145]VTTSQDMLSIM[147]EK[272]     | 2 | 893.9621 | 2.62  | 0.229 |
| 104 | IPI00291866 | 1 | 38.8 | 0.72 | 0.04 | 121 | 66 | SERPING1 Plasma protease C1 inhibitor precursor | LEMSK                             | 2 | 444.2546 | 1.926 | 0.03  |
| 104 | IPI00291866 | 1 | 38.8 | 0.72 | 0.04 | 121 | 66 | SERPING1 Plasma protease C1 inhibitor precursor | n[145]IEMSK[272]                  | 2 | 448.2617 | 1.625 | 0.148 |
| 104 | IPI00291866 | 1 | 38.8 | 0.72 | 0.04 | 121 | 66 | SERPING1 Plasma protease C1 inhibitor precursor | FPVFM[147]GR                      | 2 | 505.268  | 1.428 | 0.161 |
| 104 | IPI00291866 | 1 | 38.8 | 0.72 | 0.04 | 121 | 66 | SERPING1 Plasma protease C1 inhibitor precursor | LFVLWDQQHK                        | 3 | 531.9682 | 2.858 | 0.197 |
| 104 | IPI00291866 | 1 | 38.8 | 0.72 | 0.04 | 121 | 66 | SERPING1 Plasma protease C1 inhibitor precursor | n[145]LFVLWDQQHK[272]             | 2 | 801.4558 | 3.243 | 0.343 |
| 104 | IPI00291866 | 1 | 38.8 | 0.72 | 0.04 | 121 | 66 | SERPING1 Plasma protease C1 inhibitor precursor | LYHAFSAM[147]KK                   | 4 | 408.7328 | 1.82  | 0.03  |
| 104 | IPI00291866 | 1 | 38.8 | 0.72 | 0.04 | 121 | 66 | SERPING1 Plasma protease C1 inhibitor precursor | LFVLWDQQHK                        | 2 | 797.4487 | 3.289 | 0.249 |
| 104 | IPI00291866 | 1 | 38.8 | 0.72 | 0.04 | 121 | 66 | SERPING1 Plasma protease C1 inhibitor precursor | n[145]FIDQTLK[272]                | 2 | 576.847  | 2.294 | 0.067 |
| 104 | IPI00291866 | 1 | 38.8 | 0.72 | 0.04 | 121 | 66 | SERPING1 Plasma protease C1 inhibitor precursor | n[145]GVTSVSVQIFHS                | 2 | 653.3496 | 2.902 | 0.34  |
| 104 | IPI00291866 | 1 | 38.8 | 0.72 | 0.04 | 121 | 66 | SERPING1 Plasma protease C1 inhibitor precursor | TNLESILSYPK                       | 3 | 515.6276 | 2.03  | 0.056 |
| 104 | IPI00291866 | 1 | 38.8 | 0.72 | 0.04 | 121 | 66 | SERPING1 Plasma protease C1 inhibitor precursor | n[145]GVTSVSVQIFH                 | 2 | 609.8336 | 2.072 | 0.273 |
| 104 | IPI00291866 | 1 | 38.8 | 0.72 | 0.04 | 121 | 66 | SERPING1 Plasma protease C1 inhibitor precursor | KVETNMAFSPF                       | 2 | 775.9055 | 2.371 | 0.181 |
| 104 | IPI00291866 | 1 | 38.8 | 0.72 | 0.04 | 121 | 66 | SERPING1 Plasma protease C1 inhibitor precursor | n[145]DFTCVH                      | 2 | 456.1972 | 1.459 | 0.216 |
| 104 | IPI00291866 | 1 | 38.8 | 0.72 | 0.04 | 121 | 66 | SERPING1 Plasma protease C1 inhibitor precursor | KVETNM[147]AFSPF                  | 2 | 783.9029 | 1.999 | 0.054 |
| 104 | IPI00291866 | 1 | 38.8 | 0.72 | 0.04 | 121 | 66 | SERPING1 Plasma protease C1 inhibitor precursor | LYHAF                             | 2 | 395.716  | 1.426 | 0.03  |

|     |             |   |      |      |      |     |    |                                                              |                                        |   |           |       |       |
|-----|-------------|---|------|------|------|-----|----|--------------------------------------------------------------|----------------------------------------|---|-----------|-------|-------|
| 104 | IPI00291866 | 1 | 38.8 | 0.72 | 0.04 | 121 | 66 | SERPING1 Plasma protease C1 inhibitor precursor              | SK[272]K[272]                          | 2 | 395.7731  | 0.913 | 0.136 |
| 105 | IPI00291867 | 1 | 25.4 | 0.64 | 0.19 | 26  | 24 | CFI Complement factor I precursor                            | KVTYTSQEDLVEK                          | 2 | 980.5412  | 5.266 | 0.459 |
| 105 | IPI00291867 | 1 | 25.4 | 0.64 | 0.19 | 26  | 24 | CFI Complement factor I precursor                            | n[145]AQLGLDLPWQVAIK[272]              | 2 | 864.0084  | 4.489 | 0.444 |
| 105 | IPI00291867 | 1 | 25.4 | 0.64 | 0.19 | 26  | 24 | CFI Complement factor I precursor                            | n[145]GLETSLAECTFTK[272]               | 2 | 867.4383  | 4.463 | 0.483 |
| 105 | IPI00291867 | 1 | 25.4 | 0.64 | 0.19 | 26  | 24 | CFI Complement factor I precursor                            | n[145]SLECLHPGTK[272]                  | 2 | 709.8724  | 3.632 | 0.45  |
| 105 | IPI00291867 | 1 | 25.4 | 0.64 | 0.19 | 26  | 24 | CFI Complement factor I precursor                            | IIFHENYNAGTYQNDIALIEM[147]K            | 3 | 965.1566  | 4.62  | 0.399 |
| 105 | IPI00291867 | 1 | 25.4 | 0.64 | 0.19 | 26  | 24 | CFI Complement factor I precursor                            | n[145]IIFHENYNAGTYQNDIALIEM[147]K[272] | 3 | 967.828   | 5.605 | 0.443 |
| 105 | IPI00291867 | 1 | 25.4 | 0.64 | 0.19 | 26  | 24 | CFI Complement factor I precursor                            | AQLGLDLPWQVAIK                         | 2 | 860.0013  | 4.024 | 0.42  |
| 105 | IPI00291867 | 1 | 25.4 | 0.64 | 0.19 | 26  | 24 | CFI Complement factor I precursor                            | n[145]YTHLSCDK[272]                    | 3 | 434.2138  | 2.743 | 0.369 |
| 105 | IPI00291867 | 1 | 25.4 | 0.64 | 0.19 | 26  | 24 | CFI Complement factor I precursor                            | SLECLHPGTK                             | 2 | 705.8653  | 3.556 | 0.421 |
| 105 | IPI00291867 | 1 | 25.4 | 0.64 | 0.19 | 26  | 24 | CFI Complement factor I precursor                            | n[145]HGNTDSEGIVEVK[272]               | 2 | 836.9409  | 3.344 | 0.409 |
| 105 | IPI00291867 | 1 | 25.4 | 0.64 | 0.19 | 26  | 24 | CFI Complement factor I precursor                            | SLECLHPGTK                             | 3 | 470.9126  | 2.729 | 0.256 |
| 105 | IPI00291867 | 1 | 25.4 | 0.64 | 0.19 | 26  | 24 | CFI Complement factor I precursor                            | YTHLSCDK                               | 2 | 646.81    | 2.769 | 0.3   |
| 105 | IPI00291867 | 1 | 25.4 | 0.64 | 0.19 | 26  | 24 | CFI Complement factor I precursor                            | n[145]YTHLSCDK[272]                    | 2 | 650.8171  | 2.394 | 0.316 |
| 105 | IPI00291867 | 1 | 25.4 | 0.64 | 0.19 | 26  | 24 | CFI Complement factor I precursor                            | n[145]CIEGTCVCK[272]                   | 2 | 691.2896  | 2.71  | 0.235 |
| 105 | IPI00291867 | 1 | 25.4 | 0.64 | 0.19 | 26  | 24 | CFI Complement factor I precursor                            | n[145]IVIEYVDR                         | 2 | 575.8331  | 2.441 | 0.23  |
| 105 | IPI00291867 | 1 | 25.4 | 0.64 | 0.19 | 26  | 24 | CFI Complement factor I precursor                            | HGNTDSEGIVEVK                          | 2 | 832.9338  | 2.506 | 0.253 |
| 105 | IPI00291867 | 1 | 25.4 | 0.64 | 0.19 | 26  | 24 | CFI Complement factor I precursor                            | n[145]VITYTSQEDLVEK[272]K[272]         | 3 | 658.037   | 2.408 | 0.15  |
| 105 | IPI00291867 | 1 | 25.4 | 0.64 | 0.19 | 26  | 24 | CFI Complement factor I precursor                            | n[145]SLECLHPGTK[272]                  | 3 | 473.584   | 2.318 | 0.151 |
| 105 | IPI00291867 | 1 | 25.4 | 0.64 | 0.19 | 26  | 24 | CFI Complement factor I precursor                            | n[145]FYGNR                            | 2 | 400.7122  | 1.609 | 0.095 |
| 105 | IPI00291867 | 1 | 25.4 | 0.64 | 0.19 | 26  | 24 | CFI Complement factor I precursor                            | YTHLSCDK                               | 3 | 431.5424  | 2.09  | 0.067 |
| 105 | IPI00291867 | 1 | 25.4 | 0.64 | 0.19 | 26  | 24 | CFI Complement factor I precursor                            | YISQM[147]K                            | 2 | 533.2917  | 1.648 | 0.084 |
| 105 | IPI00291867 | 1 | 25.4 | 0.64 | 0.19 | 26  | 24 | CFI Complement factor I precursor                            | LVDQDK                                 | 2 | 499.2875  | 1.528 | 0.074 |
| 105 | IPI00291867 | 1 | 25.4 | 0.64 | 0.19 | 26  | 24 | CFI Complement factor I precursor                            | n[145]TM[147]GYQDFADVVCYTQK[272]       | 3 | 740.3402  | 1.983 | 0.056 |
| 105 | IPI00291867 | 1 | 25.4 | 0.64 | 0.19 | 26  | 24 | CFI Complement factor I precursor                            | n[145]SLLPK[272]                       | 2 | 423.2886  | 0.884 | 0.016 |
| 105 | IPI00291867 | 1 | 25.4 | 0.64 | 0.19 | 26  | 24 | CFI Complement factor I precursor                            | KVTYTSQEDLVEK                          | 3 | 654.0299  | 2.231 | 0.184 |
| 105 | IPI00291867 | 1 | 25.4 | 0.64 | 0.19 | 26  | 24 | CFI Complement factor I precursor                            | EM[147]K                               | 1 | 703.3808  | 1.121 | 0.072 |
| 106 | IPI00292218 | 1 | 4.6  | 0.68 | 0.19 | 4   | 4  | MST1 Hepatocyte growth factor-like protein precursor         | n[145]TPFDYCALR                        | 2 | 638.3028  | 2.497 | 0.191 |
| 106 | IPI00292218 | 1 | 4.6  | 0.68 | 0.19 | 4   | 4  | MST1 Hepatocyte growth factor-like protein precursor         | n[145]WDAQIPHQHR                       | 3 | 477.9169  | 3.261 | 0.143 |
| 106 | IPI00292218 | 1 | 4.6  | 0.68 | 0.19 | 4   | 4  | MST1 Hepatocyte growth factor-like protein precursor         | n[145]AAFCYQIR                         | 2 | 581.2869  | 2.189 | 0.085 |
| 106 | IPI00292218 | 1 | 4.6  | 0.68 | 0.19 | 4   | 4  | MST1 Hepatocyte growth factor-like protein precursor         | n[145]YTPTLR                           | 2 | 447.7619  | 1.739 | 0.019 |
| 107 | IPI00292530 | 1 | 41.6 | 0.73 | 0.1  | 119 | 69 | ITIH1 Inter-alpha-trypsin inhibitor heavy chain H1 precursor | IYEDHDATQQLQGFYSQVAK                   | 2 | 1311.1534 | 6.542 | 0.614 |
| 107 | IPI00292530 | 1 | 41.6 | 0.73 | 0.1  | 119 | 69 | ITIH1 Inter-alpha-trypsin inhibitor heavy chain H1 precursor | n[145]FAHYVVTSQVVNTANEAR               | 2 | 1075.5592 | 7.304 | 0.573 |
| 107 | IPI00292530 | 1 | 41.6 | 0.73 | 0.1  | 119 | 69 | ITIH1 Inter-alpha-trypsin inhibitor heavy chain H1 precursor | n[145]FPLYNLGFGH                       | 2 | 654.8465  | 4.26  | 0.47  |
| 107 | IPI00292530 | 1 | 41.6 | 0.73 | 0.1  | 119 | 69 | ITIH1 Inter-alpha-trypsin inhibitor heavy chain H1 precursor | n[145]GHMLENHVER                       | 2 | 683.3443  | 3.156 | 0.407 |
| 107 | IPI00292530 | 1 | 41.6 | 0.73 | 0.1  | 119 | 69 | ITIH1 Inter-alpha-trypsin inhibitor heavy chain H1 precursor | n[145]GHM[147]LENHVER                  | 2 | 691.3418  | 2.972 | 0.512 |
| 107 | IPI00292530 | 1 | 41.6 | 0.73 | 0.1  | 119 | 69 | ITIH1 Inter-alpha-trypsin inhibitor heavy chain H1 precursor | n[145]GSLVQASEANLQAAQDFVR              | 2 | 1074.5619 | 7.387 | 0.577 |
| 107 | IPI00292530 | 1 | 41.6 | 0.73 | 0.1  | 119 | 69 | ITIH1 Inter-alpha-trypsin inhibitor heavy chain H1 precursor | n[145]ILGDM[147]QPGDYFDLVLFGTR         | 2 | 1159.0864 | 5.617 | 0.545 |
| 107 | IPI00292530 | 1 | 41.6 | 0.73 | 0.1  | 119 | 69 | ITIH1 Inter-alpha-trypsin inhibitor heavy chain H1 precursor | n[145]IYEDHDATQQLQGFYSQVAK[272]        | 2 | 1315.1605 | 6.647 | 0.584 |
| 107 | IPI00292530 | 1 | 41.6 | 0.73 | 0.1  | 119 | 69 | ITIH1 Inter-alpha-trypsin inhibitor heavy chain H1 precursor | n[145]MSLDYGFVPTLTSM[147]SIR           | 2 | 1039.5246 | 4.58  | 0.471 |
| 107 | IPI00292530 | 1 | 41.6 | 0.73 | 0.1  | 119 | 69 | ITIH1 Inter-alpha-trypsin inhibitor heavy chain H1 precursor | GHMLENHVER                             | 3 | 454.5629  | 3.551 | 0.402 |
| 107 | IPI00292530 | 1 | 41.6 | 0.73 | 0.1  | 119 | 69 | ITIH1 Inter-alpha-trypsin inhibitor heavy chain H1 precursor | GHM[147]LENHVER                        | 3 | 459.8946  | 4.241 | 0.437 |
| 107 | IPI00292530 | 1 | 41.6 | 0.73 | 0.1  | 119 | 69 | ITIH1 Inter-alpha-trypsin inhibitor heavy chain H1 precursor | IYEDHDATQQLQGFYSQVAK                   | 3 | 874.438   | 2.876 | 0.069 |
| 107 | IPI00292530 | 1 | 41.6 | 0.73 | 0.1  | 119 | 69 | ITIH1 Inter-alpha-trypsin inhibitor heavy chain H1 precursor | n[145]FAHYVVTSQVVNTANEAR               | 3 | 717.3752  | 5.352 | 0.456 |
| 107 | IPI00292530 | 1 | 41.6 | 0.73 | 0.1  | 119 | 69 | ITIH1 Inter-alpha-trypsin inhibitor heavy chain H1 precursor | n[145]GHMLENHVER                       | 3 | 455.8986  | 4.606 | 0.307 |
| 107 | IPI00292530 | 1 | 41.6 | 0.73 | 0.1  | 119 | 69 | ITIH1 Inter-alpha-trypsin inhibitor heavy chain H1 precursor | n[145]GHM[147]LENHVER                  | 3 | 461.2303  | 3.763 | 0.419 |
| 107 | IPI00292530 | 1 | 41.6 | 0.73 | 0.1  | 119 | 69 | ITIH1 Inter-alpha-trypsin inhibitor heavy chain H1 precursor | n[145]IYEDHDATQQLQGFYSQVAK[272]        | 3 | 877.1094  | 6.5   | 0.612 |
| 107 | IPI00292530 | 1 | 41.6 | 0.73 | 0.1  | 119 | 69 | ITIH1 Inter-alpha-trypsin inhibitor heavy chain H1 precursor | n[145]TMEQFTIHLTVNPPQSK[272]           | 3 | 721.3888  | 4.965 | 0.357 |

|     |             |   |      |      |     |     |    |                                                              |                                                   |   |           |       |       |
|-----|-------------|---|------|------|-----|-----|----|--------------------------------------------------------------|---------------------------------------------------|---|-----------|-------|-------|
| 107 | IPI00292530 | 1 | 41.6 | 0.73 | 0.1 | 119 | 69 | ITIH1 Inter-alpha-trypsin inhibitor heavy chain H1 precursor | n[145]TM[147]EQFTIHLTVNPQSK[272]                  | 3 | 726.7204  | 4.952 | 0.487 |
| 107 | IPI00292530 | 1 | 41.6 | 0.73 | 0.1 | 119 | 69 | ITIH1 Inter-alpha-trypsin inhibitor heavy chain H1 precursor | n[145]GMADQDGLK[272]PTIDK[272]PSEDSPPLEMLGF       | 4 | 857.4457  | 4.067 | 0.404 |
| 107 | IPI00292530 | 1 | 41.6 | 0.73 | 0.1 | 119 | 69 | ITIH1 Inter-alpha-trypsin inhibitor heavy chain H1 precursor | n[145]AAISGENAGLVR                                | 2 | 651.3683  | 4.086 | 0.399 |
| 107 | IPI00292530 | 1 | 41.6 | 0.73 | 0.1 | 119 | 69 | ITIH1 Inter-alpha-trypsin inhibitor heavy chain H1 precursor | GM[147]ADQDGLKPTIDKPSSEDSPPLEM[147]LGPR           | 3 | 1149.5814 | 3.836 | 0.329 |
| 107 | IPI00292530 | 1 | 41.6 | 0.73 | 0.1 | 119 | 69 | ITIH1 Inter-alpha-trypsin inhibitor heavy chain H1 precursor | TMEQFTIHLTVNPQSK                                  | 3 | 718.7174  | 4.547 | 0.338 |
| 107 | IPI00292530 | 1 | 41.6 | 0.73 | 0.1 | 119 | 69 | ITIH1 Inter-alpha-trypsin inhibitor heavy chain H1 precursor | n[145]GSLVQASEANLQAAQDFVR                         | 3 | 716.7104  | 3.004 | 0.364 |
| 107 | IPI00292530 | 1 | 41.6 | 0.73 | 0.1 | 119 | 69 | ITIH1 Inter-alpha-trypsin inhibitor heavy chain H1 precursor | n[145]NHM[147]QYEIVIK[272]                        | 3 | 526.9566  | 3.568 | 0.24  |
| 107 | IPI00292530 | 1 | 41.6 | 0.73 | 0.1 | 119 | 69 | ITIH1 Inter-alpha-trypsin inhibitor heavy chain H1 precursor | n[145]TFVLSALQSPSPHSSSNTQR                        | 3 | 768.0684  | 4.17  | 0.321 |
| 107 | IPI00292530 | 1 | 41.6 | 0.73 | 0.1 | 119 | 69 | ITIH1 Inter-alpha-trypsin inhibitor heavy chain H1 precursor | GMADQDGLKPTIDKPSSEDSPPLEMLGPR                     | 4 | 854.4404  | 4.231 | 0.363 |
| 107 | IPI00292530 | 1 | 41.6 | 0.73 | 0.1 | 119 | 69 | ITIH1 Inter-alpha-trypsin inhibitor heavy chain H1 precursor | GHMLENHVER                                        | 2 | 681.3408  | 2.986 | 0.457 |
| 107 | IPI00292530 | 1 | 41.6 | 0.73 | 0.1 | 119 | 69 | ITIH1 Inter-alpha-trypsin inhibitor heavy chain H1 precursor | GHM[147]LENHVER                                   | 2 | 689.3383  | 2.833 | 0.49  |
| 107 | IPI00292530 | 1 | 41.6 | 0.73 | 0.1 | 119 | 69 | ITIH1 Inter-alpha-trypsin inhibitor heavy chain H1 precursor | n[145]GFSLDEATNLNGGLLR                            | 2 | 910.9848  | 4.733 | 0.326 |
| 107 | IPI00292530 | 1 | 41.6 | 0.73 | 0.1 | 119 | 69 | ITIH1 Inter-alpha-trypsin inhibitor heavy chain H1 precursor | n[145]NHM[147]QYEIVIK[272]                        | 2 | 789.9313  | 3.986 | 0.343 |
| 107 | IPI00292530 | 1 | 41.6 | 0.73 | 0.1 | 119 | 69 | ITIH1 Inter-alpha-trypsin inhibitor heavy chain H1 precursor | n[145]ELAAQTIK[272]K[272]                         | 3 | 478.6399  | 3.198 | 0.203 |
| 107 | IPI00292530 | 1 | 41.6 | 0.73 | 0.1 | 119 | 69 | ITIH1 Inter-alpha-trypsin inhibitor heavy chain H1 precursor | LDAQASFLPK                                        | 2 | 685.3956  | 3.075 | 0.185 |
| 107 | IPI00292530 | 1 | 41.6 | 0.73 | 0.1 | 119 | 69 | ITIH1 Inter-alpha-trypsin inhibitor heavy chain H1 precursor | NHM[147]QYEIVIK                                   | 2 | 785.9242  | 3.656 | 0.294 |
| 107 | IPI00292530 | 1 | 41.6 | 0.73 | 0.1 | 119 | 69 | ITIH1 Inter-alpha-trypsin inhibitor heavy chain H1 precursor | n[145]LDAQASFLPK[272]                             | 2 | 689.4027  | 2.021 | 0.171 |
| 107 | IPI00292530 | 1 | 41.6 | 0.73 | 0.1 | 119 | 69 | ITIH1 Inter-alpha-trypsin inhibitor heavy chain H1 precursor | n[145]QYYEGSEIVVAGR                               | 2 | 807.9159  | 3.931 | 0.361 |
| 107 | IPI00292530 | 1 | 41.6 | 0.73 | 0.1 | 119 | 69 | ITIH1 Inter-alpha-trypsin inhibitor heavy chain H1 precursor | n[145]QAVDTAVDGVFIR                               | 2 | 767.9209  | 3.809 | 0.437 |
| 107 | IPI00292530 | 1 | 41.6 | 0.73 | 0.1 | 119 | 69 | ITIH1 Inter-alpha-trypsin inhibitor heavy chain H1 precursor | n[145]VTFQLTYEEVLK[272]R                          | 3 | 638.7028  | 2.968 | 0.281 |
| 107 | IPI00292530 | 1 | 41.6 | 0.73 | 0.1 | 119 | 69 | ITIH1 Inter-alpha-trypsin inhibitor heavy chain H1 precursor | TM[147]EQFTIHLTVNPQSK                             | 3 | 724.049   | 4.571 | 0.321 |
| 107 | IPI00292530 | 1 | 41.6 | 0.73 | 0.1 | 119 | 69 | ITIH1 Inter-alpha-trypsin inhibitor heavy chain H1 precursor | ELAAQTIK                                          | 2 | 577.3506  | 2.818 | 0.035 |
| 107 | IPI00292530 | 1 | 41.6 | 0.73 | 0.1 | 119 | 69 | ITIH1 Inter-alpha-trypsin inhibitor heavy chain H1 precursor | KA AISGENAGLVR                                    | 2 | 783.4598  | 3.62  | 0.2   |
| 107 | IPI00292530 | 1 | 41.6 | 0.73 | 0.1 | 119 | 69 | ITIH1 Inter-alpha-trypsin inhibitor heavy chain H1 precursor | n[145]VTYDVSR                                     | 2 | 492.2676  | 2.337 | 0.206 |
| 107 | IPI00292530 | 1 | 41.6 | 0.73 | 0.1 | 119 | 69 | ITIH1 Inter-alpha-trypsin inhibitor heavy chain H1 precursor | GM[147]ADQDGLKPTIDKPSSEDSPPLEM[147]LGPR           | 4 | 862.4379  | 2.82  | 0.243 |
| 107 | IPI00292530 | 1 | 41.6 | 0.73 | 0.1 | 119 | 69 | ITIH1 Inter-alpha-trypsin inhibitor heavy chain H1 precursor | n[145]ELAAQTIK[272]                               | 2 | 581.3577  | 2.707 | 0.087 |
| 107 | IPI00292530 | 1 | 41.6 | 0.73 | 0.1 | 119 | 69 | ITIH1 Inter-alpha-trypsin inhibitor heavy chain H1 precursor | GM[147]ADQDGLKPTIDKPSSEDSPPLEMLGPR                | 4 | 858.4391  | 2.775 | 0.243 |
| 107 | IPI00292530 | 1 | 41.6 | 0.73 | 0.1 | 119 | 69 | ITIH1 Inter-alpha-trypsin inhibitor heavy chain H1 precursor | EVAFDLEIPK                                        | 2 | 720.9085  | 2.603 | 0.179 |
| 107 | IPI00292530 | 1 | 41.6 | 0.73 | 0.1 | 119 | 69 | ITIH1 Inter-alpha-trypsin inhibitor heavy chain H1 precursor | n[145]PLLVDVLDLQYPQDAVLALTQNHKK[272]              | 4 | 754.6681  | 2.891 | 0.307 |
| 107 | IPI00292530 | 1 | 41.6 | 0.73 | 0.1 | 119 | 69 | ITIH1 Inter-alpha-trypsin inhibitor heavy chain H1 precursor | n[145]GHM[147]LENHVER                             | 4 | 346.1746  | 2.393 | 0.105 |
| 107 | IPI00292530 | 1 | 41.6 | 0.73 | 0.1 | 119 | 69 | ITIH1 Inter-alpha-trypsin inhibitor heavy chain H1 precursor | VTYDVSR                                           | 2 | 490.264   | 2.049 | 0.169 |
| 107 | IPI00292530 | 1 | 41.6 | 0.73 | 0.1 | 119 | 69 | ITIH1 Inter-alpha-trypsin inhibitor heavy chain H1 precursor | n[145]GMADQDGLK[272]PTIDK[272]PSEDSPPLEM[147]LGPR | 4 | 861.4444  | 2.201 | 0.005 |
| 107 | IPI00292530 | 1 | 41.6 | 0.73 | 0.1 | 119 | 69 | ITIH1 Inter-alpha-trypsin inhibitor heavy chain H1 precursor | n[145]EALLK[272]                                  | 2 | 431.2861  | 1.702 | 0.145 |
| 107 | IPI00292530 | 1 | 41.6 | 0.73 | 0.1 | 119 | 69 | ITIH1 Inter-alpha-trypsin inhibitor heavy chain H1 precursor | n[145]HYVVTSQVVNTANEAR                            | 3 | 644.6734  | 3.343 | 0.248 |
| 107 | IPI00292530 | 1 | 41.6 | 0.73 | 0.1 | 119 | 69 | ITIH1 Inter-alpha-trypsin inhibitor heavy chain H1 precursor | n[145]GM[147]ADQDGLK[272]PTIDK[272]PSED           | 3 | 789.0688  | 2.481 | 0.336 |
| 107 | IPI00292530 | 1 | 41.6 | 0.73 | 0.1 | 119 | 69 | ITIH1 Inter-alpha-trypsin inhibitor heavy chain H1 precursor | n[145]RNHM[147]QYEIVIK[272]                       | 3 | 578.9903  | 2.29  | 0.089 |
| 107 | IPI00292530 | 1 | 41.6 | 0.73 | 0.1 | 119 | 69 | ITIH1 Inter-alpha-trypsin inhibitor heavy chain H1 precursor | SLKVNCK                                           | 3 | 419.9105  | 2.054 | 0.168 |
| 107 | IPI00292530 | 1 | 41.6 | 0.73 | 0.1 | 119 | 69 | ITIH1 Inter-alpha-trypsin inhibitor heavy chain H1 precursor | EAIK                                              | 2 | 427.279   | 1.917 | 0.224 |
| 107 | IPI00292530 | 1 | 41.6 | 0.73 | 0.1 | 119 | 69 | ITIH1 Inter-alpha-trypsin inhibitor heavy chain H1 precursor | n[145]GRFPLYNLGFGH                                | 3 | 507.941   | 2.648 | 0.342 |
| 107 | IPI00292530 | 1 | 41.6 | 0.73 | 0.1 | 119 | 69 | ITIH1 Inter-alpha-trypsin inhibitor heavy chain H1 precursor | n[145]FAHYVVTSQVVN                                | 2 | 754.4049  | 2.882 | 0.374 |
| 107 | IPI00292530 | 1 | 41.6 | 0.73 | 0.1 | 119 | 69 | ITIH1 Inter-alpha-trypsin inhibitor heavy chain H1 precursor | n[145]SLK[272]VNCK[272]                           | 2 | 635.3728  | 2.446 | 0.168 |
| 107 | IPI00292530 | 1 | 41.6 | 0.73 | 0.1 | 119 | 69 | ITIH1 Inter-alpha-trypsin inhibitor heavy chain H1 precursor | n[145]EVAFDLEIPK[272]                             | 2 | 724.9156  | 1.966 | 0.039 |
| 107 | IPI00292530 | 1 | 41.6 | 0.73 | 0.1 | 119 | 69 | ITIH1 Inter-alpha-trypsin inhibitor heavy chain H1 precursor | n[145]JLGD[M[147]QPGDYFDLVLFGR                    | 3 | 773.06    | 2.375 | 0.135 |
| 107 | IPI00292530 | 1 | 41.6 | 0.73 | 0.1 | 119 | 69 | ITIH1 Inter-alpha-trypsin inhibitor heavy chain H1 precursor | n[145]LTIQELLAK[272]                              | 2 | 658.9232  | 3.968 | 0.144 |
| 107 | IPI00292530 | 1 | 41.6 | 0.73 | 0.1 | 119 | 69 | ITIH1 Inter-alpha-trypsin inhibitor heavy chain H1 precursor | n[145]TAFISDFAVTADGNAFIGDIK[272]                  | 3 | 821.1     | 2.443 | 0.225 |
| 107 | IPI00292530 | 1 | 41.6 | 0.73 | 0.1 | 119 | 69 | ITIH1 Inter-alpha-trypsin inhibitor heavy chain H1 precursor | KSFS GK                                           | 2 | 537.327   | 1.865 | 0.132 |
| 107 | IPI00292530 | 1 | 41.6 | 0.73 | 0.1 | 119 | 69 | ITIH1 Inter-alpha-trypsin inhibitor heavy chain H1 precursor | GHM[147]LENHVER                                   | 4 | 345.1728  | 1.736 | 0.008 |
| 107 | IPI00292530 | 1 | 41.6 | 0.73 | 0.1 | 119 | 69 | ITIH1 Inter-alpha-trypsin inhibitor heavy chain H1 precursor | n[145]AISGENAGLVR                                 | 2 | 615.8498  | 3.773 | 0.194 |

|     |             |   |      |      |      |     |    |                                                              |                                 |   |           |       |       |
|-----|-------------|---|------|------|------|-----|----|--------------------------------------------------------------|---------------------------------|---|-----------|-------|-------|
| 107 | IPI00292530 | 1 | 41.6 | 0.73 | 0.1  | 119 | 69 | ITIH1 Inter-alpha-trypsin inhibitor heavy chain H1 precursor | LTIQELLAK                       | 2 | 654.9161  | 3.647 | 0.145 |
| 107 | IPI00292530 | 1 | 41.6 | 0.73 | 0.1  | 119 | 69 | ITIH1 Inter-alpha-trypsin inhibitor heavy chain H1 precursor | SLKVNCK                         | 2 | 629.3622  | 1.905 | 0.145 |
| 107 | IPI00292530 | 1 | 41.6 | 0.73 | 0.1  | 119 | 69 | ITIH1 Inter-alpha-trypsin inhibitor heavy chain H1 precursor | TAFISDFAVTADGNAFIGDIK           | 3 | 818.4286  | 2.507 | 0.092 |
| 107 | IPI00292530 | 1 | 41.6 | 0.73 | 0.1  | 119 | 69 | ITIH1 Inter-alpha-trypsin inhibitor heavy chain H1 precursor | n[145]ADVQAHGEGQEF              | 2 | 716.3347  | 3.063 | 0.134 |
| 107 | IPI00292530 | 1 | 41.6 | 0.73 | 0.1  | 119 | 69 | ITIH1 Inter-alpha-trypsin inhibitor heavy chain H1 precursor | n[145]SLK[272]VNCK[272]         | 3 | 423.9176  | 1.829 | 0.035 |
| 107 | IPI00292530 | 1 | 41.6 | 0.73 | 0.1  | 119 | 69 | ITIH1 Inter-alpha-trypsin inhibitor heavy chain H1 precursor | n[145]GRFPLYNLGF                | 2 | 664.3676  | 1.824 | 0.225 |
| 107 | IPI00292530 | 1 | 41.6 | 0.73 | 0.1  | 119 | 69 | ITIH1 Inter-alpha-trypsin inhibitor heavy chain H1 precursor | GRFPLYNLGF                      | 2 | 662.3641  | 2.252 | 0.288 |
| 107 | IPI00292530 | 1 | 41.6 | 0.73 | 0.1  | 119 | 69 | ITIH1 Inter-alpha-trypsin inhibitor heavy chain H1 precursor | GRFPLYNLGFGH                    | 2 | 759.4043  | 2.838 | 0.158 |
| 107 | IPI00292530 | 1 | 41.6 | 0.73 | 0.1  | 119 | 69 | ITIH1 Inter-alpha-trypsin inhibitor heavy chain H1 precursor | n[145]MSLDYGFVPLTSM[147]SIR     | 3 | 693.3521  | 3.067 | 0.033 |
| 107 | IPI00292530 | 1 | 41.6 | 0.73 | 0.1  | 119 | 69 | ITIH1 Inter-alpha-trypsin inhibitor heavy chain H1 precursor | GM[147]ADQDGLKPTIDKPSED         | 3 | 785.0617  | 2.279 | 0.083 |
| 107 | IPI00292530 | 1 | 41.6 | 0.73 | 0.1  | 119 | 69 | ITIH1 Inter-alpha-trypsin inhibitor heavy chain H1 precursor | EM[147]K                        | 1 | 703.3808  | 1.121 | 0.072 |
| 108 | IPI00292946 | 1 | 19   | 0.96 | 0.2  | 18  | 18 | SERPINA7 Thyroxine-binding globulin precursor                | n[145]QEINSHVEM[147]QTK[272]    | 3 | 583.3011  | 3.72  | 0.388 |
| 108 | IPI00292946 | 1 | 19   | 0.96 | 0.2  | 18  | 18 | SERPINA7 Thyroxine-binding globulin precursor                | QEINSHVEMQTK                    | 3 | 575.2981  | 2.724 | 0.339 |
| 108 | IPI00292946 | 1 | 19   | 0.96 | 0.2  | 18  | 18 | SERPINA7 Thyroxine-binding globulin precursor                | QEINSHVEM[147]QTK               | 3 | 580.6297  | 3.384 | 0.346 |
| 108 | IPI00292946 | 1 | 19   | 0.96 | 0.2  | 18  | 18 | SERPINA7 Thyroxine-binding globulin precursor                | n[145]TEDSSSFLIDK[272]          | 2 | 765.4005  | 3.761 | 0.364 |
| 108 | IPI00292946 | 1 | 19   | 0.96 | 0.2  | 18  | 18 | SERPINA7 Thyroxine-binding globulin precursor                | n[145]NALALFVLPK[272]           | 2 | 687.4416  | 3.476 | 0.339 |
| 108 | IPI00292946 | 1 | 19   | 0.96 | 0.2  | 18  | 18 | SERPINA7 Thyroxine-binding globulin precursor                | n[145]SFMLLILER                 | 2 | 633.3741  | 2.982 | 0.341 |
| 108 | IPI00292946 | 1 | 19   | 0.96 | 0.2  | 18  | 18 | SERPINA7 Thyroxine-binding globulin precursor                | NALALFVLPK                      | 2 | 683.4345  | 3.582 | 0.395 |
| 108 | IPI00292946 | 1 | 19   | 0.96 | 0.2  | 18  | 18 | SERPINA7 Thyroxine-binding globulin precursor                | TEDSSSFLIDK                     | 2 | 761.3934  | 2.863 | 0.309 |
| 108 | IPI00292946 | 1 | 19   | 0.96 | 0.2  | 18  | 18 | SERPINA7 Thyroxine-binding globulin precursor                | FTVETPDK                        | 2 | 608.8323  | 2.837 | 0.151 |
| 108 | IPI00292946 | 1 | 19   | 0.96 | 0.2  | 18  | 18 | SERPINA7 Thyroxine-binding globulin precursor                | n[145]HLK[272]PLAK[272]         | 2 | 619.9191  | 2.035 | 0.25  |
| 108 | IPI00292946 | 1 | 19   | 0.96 | 0.2  | 18  | 18 | SERPINA7 Thyroxine-binding globulin precursor                | n[145]GWVDLFVVPK[272]           | 2 | 674.897   | 2.585 | 0.201 |
| 108 | IPI00292946 | 1 | 19   | 0.96 | 0.2  | 18  | 18 | SERPINA7 Thyroxine-binding globulin precursor                | HLKPLAK                         | 2 | 613.9085  | 2.113 | 0.151 |
| 108 | IPI00292946 | 1 | 19   | 0.96 | 0.2  | 18  | 18 | SERPINA7 Thyroxine-binding globulin precursor                | GWVDLFVVPK                      | 2 | 670.8899  | 2.067 | 0.103 |
| 108 | IPI00292946 | 1 | 19   | 0.96 | 0.2  | 18  | 18 | SERPINA7 Thyroxine-binding globulin precursor                | HLKPLAK                         | 3 | 409.6081  | 1.887 | 0.13  |
| 108 | IPI00292946 | 1 | 19   | 0.96 | 0.2  | 18  | 18 | SERPINA7 Thyroxine-binding globulin precursor                | n[145]FAFNLYR                   | 2 | 537.7963  | 2.516 | 0.3   |
| 108 | IPI00292946 | 1 | 19   | 0.96 | 0.2  | 18  | 18 | SERPINA7 Thyroxine-binding globulin precursor                | n[145]FLNDVK[272]               | 2 | 512.3075  | 2     | 0.019 |
| 108 | IPI00292946 | 1 | 19   | 0.96 | 0.2  | 18  | 18 | SERPINA7 Thyroxine-binding globulin precursor                | n[145]AFNLYR                    | 2 | 464.2621  | 2.458 | 0.176 |
| 108 | IPI00292946 | 1 | 19   | 0.96 | 0.2  | 18  | 18 | SERPINA7 Thyroxine-binding globulin precursor                | n[145]HLK[272]PLAK[272]         | 3 | 413.6152  | 1.893 | 0.322 |
| 108 | IPI00292946 | 1 | 19   | 0.96 | 0.2  | 18  | 18 | SERPINA7 Thyroxine-binding globulin precursor                | n[145]FNLYR                     | 2 | 428.7435  | 1.775 | 0.037 |
| 109 | IPI00292950 | 1 | 29.3 | 0.7  | 0.07 | 84  | 44 | SERPIND1 Serpin peptidase inhibitor                          | SVNDLYIQK                       | 2 | 680.3852  | 3.856 | 0.37  |
| 109 | IPI00292950 | 1 | 29.3 | 0.7  | 0.07 | 84  | 44 | SERPIND1 Serpin peptidase inhibitor                          | n[145]EYYFAEAQIADFSDPAFISK[272] | 2 | 1300.6436 | 5.857 | 0.494 |
| 109 | IPI00292950 | 1 | 29.3 | 0.7  | 0.07 | 84  | 44 | SERPIND1 Serpin peptidase inhibitor                          | n[145]SVNDLYIQK[272]            | 2 | 684.3923  | 4.111 | 0.364 |
| 109 | IPI00292950 | 1 | 29.3 | 0.7  | 0.07 | 84  | 44 | SERPIND1 Serpin peptidase inhibitor                          | n[145]VEM[147]THNHNFR           | 2 | 722.8473  | 3.766 | 0.426 |
| 109 | IPI00292950 | 1 | 29.3 | 0.7  | 0.07 | 84  | 44 | SERPIND1 Serpin peptidase inhibitor                          | n[145]YEITTIHNLFR               | 2 | 775.926   | 3.894 | 0.392 |
| 109 | IPI00292950 | 1 | 29.3 | 0.7  | 0.07 | 84  | 44 | SERPIND1 Serpin peptidase inhibitor                          | EYYFAEAQIADFSDPAFISK            | 3 | 864.7601  | 5.707 | 0.359 |
| 109 | IPI00292950 | 1 | 29.3 | 0.7  | 0.07 | 84  | 44 | SERPIND1 Serpin peptidase inhibitor                          | FTVDRPFLFLIYHR                  | 3 | 698.3826  | 3.989 | 0.349 |
| 109 | IPI00292950 | 1 | 29.3 | 0.7  | 0.07 | 84  | 44 | SERPIND1 Serpin peptidase inhibitor                          | n[145]EYYFAEAQIADFSDPAFISK[272] | 3 | 867.4315  | 4.653 | 0.488 |
| 109 | IPI00292950 | 1 | 29.3 | 0.7  | 0.07 | 84  | 44 | SERPIND1 Serpin peptidase inhibitor                          | n[145]FPVEM[147]THNHNFR         | 4 | 422.9576  | 3.152 | 0.401 |
| 109 | IPI00292950 | 1 | 29.3 | 0.7  | 0.07 | 84  | 44 | SERPIND1 Serpin peptidase inhibitor                          | n[145]GETHEQVHSILHFK[272]       | 4 | 488.2664  | 3.594 | 0.395 |
| 109 | IPI00292950 | 1 | 29.3 | 0.7  | 0.07 | 84  | 44 | SERPIND1 Serpin peptidase inhibitor                          | n[145]FPVEM[147]THNHNFR         | 3 | 563.6076  | 2.849 | 0.348 |
| 109 | IPI00292950 | 1 | 29.3 | 0.7  | 0.07 | 84  | 44 | SERPIND1 Serpin peptidase inhibitor                          | n[145]FTVDRPFLFLIYHR            | 3 | 699.7183  | 3.732 | 0.412 |
| 109 | IPI00292950 | 1 | 29.3 | 0.7  | 0.07 | 84  | 44 | SERPIND1 Serpin peptidase inhibitor                          | n[145]YEITTIHNLFR               | 3 | 517.6198  | 3.163 | 0.318 |
| 109 | IPI00292950 | 1 | 29.3 | 0.7  | 0.07 | 84  | 44 | SERPIND1 Serpin peptidase inhibitor                          | n[145]FAFNLYR                   | 2 | 537.7963  | 2.516 | 0.3   |
| 109 | IPI00292950 | 1 | 29.3 | 0.7  | 0.07 | 84  | 44 | SERPIND1 Serpin peptidase inhibitor                          | n[145]NYNLVESLK[272]            | 2 | 684.3923  | 2.796 | 0.275 |
| 109 | IPI00292950 | 1 | 29.3 | 0.7  | 0.07 | 84  | 44 | SERPIND1 Serpin peptidase inhibitor                          | NYNLVESLK                       | 2 | 680.3852  | 2.636 | 0.281 |
| 109 | IPI00292950 | 1 | 29.3 | 0.7  | 0.07 | 84  | 44 | SERPIND1 Serpin peptidase inhibitor                          | QFPILLDFK                       | 2 | 700.9187  | 2.595 | 0.251 |
| 109 | IPI00292950 | 1 | 29.3 | 0.7  | 0.07 | 84  | 44 | SERPIND1 Serpin peptidase inhibitor                          | n[145]QFPILLDFK[272]            | 2 | 704.9258  | 1.982 | 0.204 |

|     |             |   |      |      |      |    |    |                                               |                                            |   |          |       |       |
|-----|-------------|---|------|------|------|----|----|-----------------------------------------------|--------------------------------------------|---|----------|-------|-------|
| 109 | IPI00292950 | 1 | 29.3 | 0.7  | 0.07 | 84 | 44 | SERPIND1 Serpin peptidase inhibitor           | n[145]FPVEMTHNHNFR                         | 3 | 558.276  | 2.569 | 0.138 |
| 109 | IPI00292950 | 1 | 29.3 | 0.7  | 0.07 | 84 | 44 | SERPIND1 Serpin peptidase inhibitor           | n[145]FPVEMTHNHNFR                         | 2 | 836.9104 | 3.539 | 0.243 |
| 109 | IPI00292950 | 1 | 29.3 | 0.7  | 0.07 | 84 | 44 | SERPIND1 Serpin peptidase inhibitor           | n[145]TLEAQLTPR                            | 2 | 586.8414 | 2.739 | 0.21  |
| 109 | IPI00292950 | 1 | 29.3 | 0.7  | 0.07 | 84 | 44 | SERPIND1 Serpin peptidase inhibitor           | n[145]NFGYTLR                              | 2 | 507.7781 | 2.523 | 0.132 |
| 109 | IPI00292950 | 1 | 29.3 | 0.7  | 0.07 | 84 | 44 | SERPIND1 Serpin peptidase inhibitor           | n[145]VEMTHNHNFR                           | 3 | 476.9023 | 3.348 | 0.353 |
| 109 | IPI00292950 | 1 | 29.3 | 0.7  | 0.07 | 84 | 44 | SERPIND1 Serpin peptidase inhibitor           | n[145]TSCLLFM[147]JGR                      | 2 | 617.2992 | 2.542 | 0.236 |
| 109 | IPI00292950 | 1 | 29.3 | 0.7  | 0.07 | 84 | 44 | SERPIND1 Serpin peptidase inhibitor           | n[145]FPVEM[147]THNHNFR                    | 2 | 844.9078 | 3.413 | 0.358 |
| 109 | IPI00292950 | 1 | 29.3 | 0.7  | 0.07 | 84 | 44 | SERPIND1 Serpin peptidase inhibitor           | n[145]VEM[147]THNHNFR                      | 3 | 482.2339 | 2.378 | 0.13  |
| 109 | IPI00292950 | 1 | 29.3 | 0.7  | 0.07 | 84 | 44 | SERPIND1 Serpin peptidase inhibitor           | n[145]FPVEMTHNHNFR                         | 4 | 418.9588 | 2.249 | 0.098 |
| 109 | IPI00292950 | 1 | 29.3 | 0.7  | 0.07 | 84 | 44 | SERPIND1 Serpin peptidase inhibitor           | n[145]LFLIYEHR                             | 3 | 412.2403 | 2.97  | 0.252 |
| 109 | IPI00292950 | 1 | 29.3 | 0.7  | 0.07 | 84 | 44 | SERPIND1 Serpin peptidase inhibitor           | n[145]IAIDIFK[272]                         | 2 | 554.3545 | 2.03  | 0.154 |
| 109 | IPI00292950 | 1 | 29.3 | 0.7  | 0.07 | 84 | 44 | SERPIND1 Serpin peptidase inhibitor           | EVIIPK                                     | 2 | 489.821  | 1.843 | 0.095 |
| 109 | IPI00292950 | 1 | 29.3 | 0.7  | 0.07 | 84 | 44 | SERPIND1 Serpin peptidase inhibitor           | IAIDIFK                                    | 2 | 550.3474 | 2.258 | 0.054 |
| 109 | IPI00292950 | 1 | 29.3 | 0.7  | 0.07 | 84 | 44 | SERPIND1 Serpin peptidase inhibitor           | n[145]EVIIPK[272]                          | 2 | 493.8281 | 1.968 | 0.036 |
| 109 | IPI00292950 | 1 | 29.3 | 0.7  | 0.07 | 84 | 44 | SERPIND1 Serpin peptidase inhibitor           | n[145]TVDRPFLFLIYEHR                       | 4 | 488.2734 | 3.198 | 0.306 |
| 109 | IPI00292950 | 1 | 29.3 | 0.7  | 0.07 | 84 | 44 | SERPIND1 Serpin peptidase inhibitor           | n[145]LIYEHR                               | 3 | 325.5228 | 2.513 | 0.179 |
| 109 | IPI00292950 | 1 | 29.3 | 0.7  | 0.07 | 84 | 44 | SERPIND1 Serpin peptidase inhibitor           | n[145]LFLIYEHR                             | 2 | 617.8569 | 2.999 | 0.223 |
| 109 | IPI00292950 | 1 | 29.3 | 0.7  | 0.07 | 84 | 44 | SERPIND1 Serpin peptidase inhibitor           | n[145]ILNCIYFK[272]                        | 2 | 674.374  | 2.873 | 0.28  |
| 109 | IPI00292950 | 1 | 29.3 | 0.7  | 0.07 | 84 | 44 | SERPIND1 Serpin peptidase inhibitor           | FPILLDFK                                   | 2 | 636.8894 | 2.684 | 0.183 |
| 109 | IPI00292950 | 1 | 29.3 | 0.7  | 0.07 | 84 | 44 | SERPIND1 Serpin peptidase inhibitor           | n[145]AFNLYR                               | 2 | 464.2621 | 2.458 | 0.176 |
| 109 | IPI00292950 | 1 | 29.3 | 0.7  | 0.07 | 84 | 44 | SERPIND1 Serpin peptidase inhibitor           | n[145]GETHEQVHSILH                         | 3 | 510.9309 | 2.49  | 0.198 |
| 109 | IPI00292950 | 1 | 29.3 | 0.7  | 0.07 | 84 | 44 | SERPIND1 Serpin peptidase inhibitor           | n[145]FTVDRPFLF                            | 2 | 643.3567 | 1.992 | 0.078 |
| 109 | IPI00292950 | 1 | 29.3 | 0.7  | 0.07 | 84 | 44 | SERPIND1 Serpin peptidase inhibitor           | n[145]LIYEHR                               | 2 | 487.7806 | 2.345 | 0.132 |
| 109 | IPI00292950 | 1 | 29.3 | 0.7  | 0.07 | 84 | 44 | SERPIND1 Serpin peptidase inhibitor           | n[145]VEM[147]THNHNFR                      | 4 | 361.9273 | 2.337 | 0.234 |
| 109 | IPI00292950 | 1 | 29.3 | 0.7  | 0.07 | 84 | 44 | SERPIND1 Serpin peptidase inhibitor           | n[145]QFPILLDFK[272]                       | 3 | 470.2863 | 1.84  | 0.032 |
| 109 | IPI00292950 | 1 | 29.3 | 0.7  | 0.07 | 84 | 44 | SERPIND1 Serpin peptidase inhibitor           | n[145]FPILLDFK[272]                        | 2 | 640.8965 | 2.149 | 0.08  |
| 109 | IPI00292950 | 1 | 29.3 | 0.7  | 0.07 | 84 | 44 | SERPIND1 Serpin peptidase inhibitor           | n[145]FNLYR                                | 2 | 428.7435 | 1.775 | 0.037 |
| 109 | IPI00292950 | 1 | 29.3 | 0.7  | 0.07 | 84 | 44 | SERPIND1 Serpin peptidase inhibitor           | n[145]CIYFK[272]                           | 2 | 504.2685 | 1.655 | 0.213 |
| 110 | IPI00293925 | 1 | 17   | 0.67 | 0.03 | 15 | 10 | FCN3 Isoform 1 of Ficolin-3 precursor         | FSEGTAGDLSLHSGR                            | 2 | 880.9318 | 4.897 | 0.477 |
| 110 | IPI00293925 | 1 | 17   | 0.67 | 0.03 | 15 | 10 | FCN3 Isoform 1 of Ficolin-3 precursor         | YAVSEAAAHK                                 | 2 | 663.8619 | 3.957 | 0.537 |
| 110 | IPI00293925 | 1 | 17   | 0.67 | 0.03 | 15 | 10 | FCN3 Isoform 1 of Ficolin-3 precursor         | n[145]YAVSEAAAHK[272]                      | 2 | 667.869  | 4.352 | 0.56  |
| 110 | IPI00293925 | 1 | 17   | 0.67 | 0.03 | 15 | 10 | FCN3 Isoform 1 of Ficolin-3 precursor         | LLGEVDHYQLALGK                             | 3 | 612.6841 | 3.226 | 0.436 |
| 110 | IPI00293925 | 1 | 17   | 0.67 | 0.03 | 15 | 10 | FCN3 Isoform 1 of Ficolin-3 precursor         | YAVSEAAAHK                                 | 3 | 442.9104 | 4.704 | 0.49  |
| 110 | IPI00293925 | 1 | 17   | 0.67 | 0.03 | 15 | 10 | FCN3 Isoform 1 of Ficolin-3 precursor         | n[145]FSEGTAGDLSLHSGR                      | 3 | 588.9593 | 4.884 | 0.457 |
| 110 | IPI00293925 | 1 | 17   | 0.67 | 0.03 | 15 | 10 | FCN3 Isoform 1 of Ficolin-3 precursor         | n[145]LLGEVDHYQLALGK[272]                  | 3 | 615.3555 | 2.607 | 0.166 |
| 110 | IPI00293925 | 1 | 17   | 0.67 | 0.03 | 15 | 10 | FCN3 Isoform 1 of Ficolin-3 precursor         | n[145]YAVSEAAAHK[272]                      | 3 | 445.5818 | 4.274 | 0.459 |
| 110 | IPI00293925 | 1 | 17   | 0.67 | 0.03 | 15 | 10 | FCN3 Isoform 1 of Ficolin-3 precursor         | n[145]TFAHYATFR                            | 3 | 419.8881 | 2.767 | 0.249 |
| 110 | IPI00293925 | 1 | 17   | 0.67 | 0.03 | 15 | 10 | FCN3 Isoform 1 of Ficolin-3 precursor         | n[145]TFAHYATFR                            | 2 | 629.3285 | 2.074 | 0.239 |
| 111 | IPI00294004 | 1 | 23.4 | 0.73 | 0.19 | 25 | 19 | PROS1 Vitamin K-dependent protein S precursor | DVDECSLKPSICGTAVCK                         | 3 | 809.3742 | 4.651 | 0.465 |
| 111 | IPI00294004 | 1 | 23.4 | 0.73 | 0.19 | 25 | 19 | PROS1 Vitamin K-dependent protein S precursor | n[145]DVDECSLK[272]PSICGTAVCK[272]         | 3 | 813.3813 | 4.508 | 0.492 |
| 111 | IPI00294004 | 1 | 23.4 | 0.73 | 0.19 | 25 | 19 | PROS1 Vitamin K-dependent protein S precursor | n[145]QALSLCSDQQSHLEFR                     | 3 | 722.3582 | 4.144 | 0.518 |
| 111 | IPI00294004 | 1 | 23.4 | 0.73 | 0.19 | 25 | 19 | PROS1 Vitamin K-dependent protein S precursor | n[145]DCK[272]DVDECSLK[272]PSICGTAVCK[272] | 4 | 744.343  | 4.123 | 0.548 |
| 111 | IPI00294004 | 1 | 23.4 | 0.73 | 0.19 | 25 | 19 | PROS1 Vitamin K-dependent protein S precursor | KVESELIKPINPR                              | 3 | 648.3982 | 3.909 | 0.305 |
| 111 | IPI00294004 | 1 | 23.4 | 0.73 | 0.19 | 25 | 19 | PROS1 Vitamin K-dependent protein S precursor | KVESELIKPINPR                              | 4 | 486.5505 | 3.146 | 0.344 |
| 111 | IPI00294004 | 1 | 23.4 | 0.73 | 0.19 | 25 | 19 | PROS1 Vitamin K-dependent protein S precursor | n[145]HCLVTVEK[272]                        | 2 | 631.8456 | 2.705 | 0.426 |
| 111 | IPI00294004 | 1 | 23.4 | 0.73 | 0.19 | 25 | 19 | PROS1 Vitamin K-dependent protein S precursor | NNLELSTPLK                                 | 2 | 704.9116 | 3.52  | 0.277 |
| 111 | IPI00294004 | 1 | 23.4 | 0.73 | 0.19 | 25 | 19 | PROS1 Vitamin K-dependent protein S precursor | n[145]IETISHEDLQR                          | 2 | 742.8949 | 3.353 | 0.304 |
| 111 | IPI00294004 | 1 | 23.4 | 0.73 | 0.19 | 25 | 19 | PROS1 Vitamin K-dependent protein S precursor | n[145]SFQTGLFTAAR                          | 2 | 671.8654 | 2.864 | 0.369 |

|     |             |   |      |      |      |    |    |                                                                       |                                   |   |           |       |       |
|-----|-------------|---|------|------|------|----|----|-----------------------------------------------------------------------|-----------------------------------|---|-----------|-------|-------|
| 111 | IPI00294004 | 1 | 23.4 | 0.73 | 0.19 | 25 | 19 | PROS1 Vitamin K-dependent protein S precursor                         | n[145]VYFAGFPR                    | 2 | 550.8041  | 2.675 | 0.361 |
| 111 | IPI00294004 | 1 | 23.4 | 0.73 | 0.19 | 25 | 19 | PROS1 Vitamin K-dependent protein S precursor                         | n[145]SQDILLSVENTVIYR             | 2 | 947.5238  | 3.368 | 0.219 |
| 111 | IPI00294004 | 1 | 23.4 | 0.73 | 0.19 | 25 | 19 | PROS1 Vitamin K-dependent protein S precursor                         | HCLVTVEK                          | 2 | 627.8385  | 2.785 | 0.307 |
| 111 | IPI00294004 | 1 | 23.4 | 0.73 | 0.19 | 25 | 19 | PROS1 Vitamin K-dependent protein S precursor                         | n[145]NNLELSTPLK[272]             | 2 | 708.9187  | 3.354 | 0.157 |
| 111 | IPI00294004 | 1 | 23.4 | 0.73 | 0.19 | 25 | 19 | PROS1 Vitamin K-dependent protein S precursor                         | n[145]QLAVLDK[272]                | 2 | 537.8417  | 2.031 | 0.131 |
| 111 | IPI00294004 | 1 | 23.4 | 0.73 | 0.19 | 25 | 19 | PROS1 Vitamin K-dependent protein S precursor                         | n[145]NIPGDFECECEPEGYR            | 2 | 982.892   | 1.661 | 0.225 |
| 111 | IPI00294004 | 1 | 23.4 | 0.73 | 0.19 | 25 | 19 | PROS1 Vitamin K-dependent protein S precursor                         | SFQTGLFTAAR                       | 2 | 669.8619  | 2.279 | 0.124 |
| 111 | IPI00294004 | 1 | 23.4 | 0.73 | 0.19 | 25 | 19 | PROS1 Vitamin K-dependent protein S precursor                         | n[145]IEVQLK[272]                 | 2 | 509.331   | 2.039 | 0.067 |
| 111 | IPI00294004 | 1 | 23.4 | 0.73 | 0.19 | 25 | 19 | PROS1 Vitamin K-dependent protein S precursor                         | n[145]SCEVVSVCPLNLDTK[272]        | 3 | 700.6866  | 2.34  | 0.039 |
| 111 | IPI00294004 | 1 | 23.4 | 0.73 | 0.19 | 25 | 19 | PROS1 Vitamin K-dependent protein S precursor                         | n[145]SELIK[272]                  | 2 | 439.2835  | 2.103 | 0.159 |
| 112 | IPI00294193 | 1 | 36   | 0.7  | 0.14 | 51 | 68 | ITIH4 Isoform 1 of Inter-alpha-trypsin inhibitor heavy chain H4 precu | AEAQAQYSAAVAK                     | 2 | 794.4281  | 4.944 | 0.367 |
| 112 | IPI00294193 | 1 | 36   | 0.7  | 0.14 | 51 | 68 | ITIH4 Isoform 1 of Inter-alpha-trypsin inhibitor heavy chain H4 precu | ANTVQEATFQM[147]ELPK              | 2 | 1002.017  | 5.354 | 0.526 |
| 112 | IPI00294193 | 1 | 36   | 0.7  | 0.14 | 51 | 68 | ITIH4 Isoform 1 of Inter-alpha-trypsin inhibitor heavy chain H4 precu | ETLFSVMPGLK                       | 2 | 751.426   | 4.357 | 0.421 |
| 112 | IPI00294193 | 1 | 36   | 0.7  | 0.14 | 51 | 68 | ITIH4 Isoform 1 of Inter-alpha-trypsin inhibitor heavy chain H4 precu | ETLFSVM[147]PGLK                  | 2 | 759.4235  | 3.992 | 0.419 |
| 112 | IPI00294193 | 1 | 36   | 0.7  | 0.14 | 51 | 68 | ITIH4 Isoform 1 of Inter-alpha-trypsin inhibitor heavy chain H4 precu | ITFELVYEELLK                      | 2 | 889.011   | 3.679 | 0.459 |
| 112 | IPI00294193 | 1 | 36   | 0.7  | 0.14 | 51 | 68 | ITIH4 Isoform 1 of Inter-alpha-trypsin inhibitor heavy chain H4 precu | n[145]AEAQAQYSAAVAK[272]          | 2 | 798.4352  | 4.983 | 0.513 |
| 112 | IPI00294193 | 1 | 36   | 0.7  | 0.14 | 51 | 68 | ITIH4 Isoform 1 of Inter-alpha-trypsin inhibitor heavy chain H4 precu | n[145]ETLFSVMPGLK[272]            | 2 | 755.4331  | 3.501 | 0.447 |
| 112 | IPI00294193 | 1 | 36   | 0.7  | 0.14 | 51 | 68 | ITIH4 Isoform 1 of Inter-alpha-trypsin inhibitor heavy chain H4 precu | n[145]ETLFSVM[147]PGLK[272]       | 2 | 763.4306  | 3.517 | 0.46  |
| 112 | IPI00294193 | 1 | 36   | 0.7  | 0.14 | 51 | 68 | ITIH4 Isoform 1 of Inter-alpha-trypsin inhibitor heavy chain H4 precu | DQFNLIVFSTEATQWRPSLVPASAENVNK     | 3 | 1181.2861 | 5.92  | 0.573 |
| 112 | IPI00294193 | 1 | 36   | 0.7  | 0.14 | 51 | 68 | ITIH4 Isoform 1 of Inter-alpha-trypsin inhibitor heavy chain H4 precu | EKAEAQAQYSAAVAK                   | 3 | 662.3654  | 4.51  | 0.529 |
| 112 | IPI00294193 | 1 | 36   | 0.7  | 0.14 | 51 | 68 | ITIH4 Isoform 1 of Inter-alpha-trypsin inhibitor heavy chain H4 precu | ITFELVYEELLKR                     | 3 | 645.0434  | 3.128 | 0.455 |
| 112 | IPI00294193 | 1 | 36   | 0.7  | 0.14 | 51 | 68 | ITIH4 Isoform 1 of Inter-alpha-trypsin inhibitor heavy chain H4 precu | n[145]EK[272]AEAQAQYSAAVAK[272]   | 3 | 666.3725  | 4.565 | 0.38  |
| 112 | IPI00294193 | 1 | 36   | 0.7  | 0.14 | 51 | 68 | ITIH4 Isoform 1 of Inter-alpha-trypsin inhibitor heavy chain H4 precu | n[145]EK[272]NGIDIYSLTVDSR        | 3 | 666.6964  | 4.116 | 0.439 |
| 112 | IPI00294193 | 1 | 36   | 0.7  | 0.14 | 51 | 68 | ITIH4 Isoform 1 of Inter-alpha-trypsin inhibitor heavy chain H4 precu | n[145]FK[272]PTLSQQQK[272]        | 3 | 546.3298  | 2.089 | 0.021 |
| 112 | IPI00294193 | 1 | 36   | 0.7  | 0.14 | 51 | 68 | ITIH4 Isoform 1 of Inter-alpha-trypsin inhibitor heavy chain H4 precu | n[145]ITFELVYEELLK[272]R          | 3 | 647.7148  | 3.584 | 0.375 |
| 112 | IPI00294193 | 1 | 36   | 0.7  | 0.14 | 51 | 68 | ITIH4 Isoform 1 of Inter-alpha-trypsin inhibitor heavy chain H4 precu | n[145]NPLVWVHASPEHVVVTR           | 3 | 695.3889  | 3.303 | 0.383 |
| 112 | IPI00294193 | 1 | 36   | 0.7  | 0.14 | 51 | 68 | ITIH4 Isoform 1 of Inter-alpha-trypsin inhibitor heavy chain H4 precu | n[145]VPDHAAYHPFR                 | 3 | 485.2534  | 4.443 | 0.388 |
| 112 | IPI00294193 | 1 | 36   | 0.7  | 0.14 | 51 | 68 | ITIH4 Isoform 1 of Inter-alpha-trypsin inhibitor heavy chain H4 precu | n[145]YIFHNFMER                   | 3 | 467.5682  | 3.928 | 0.357 |
| 112 | IPI00294193 | 1 | 36   | 0.7  | 0.14 | 51 | 68 | ITIH4 Isoform 1 of Inter-alpha-trypsin inhibitor heavy chain H4 precu | NPLVWVHASPEHVVVTR                 | 4 | 520.7917  | 4.709 | 0.506 |
| 112 | IPI00294193 | 1 | 36   | 0.7  | 0.14 | 51 | 68 | ITIH4 Isoform 1 of Inter-alpha-trypsin inhibitor heavy chain H4 precu | FKPTLSQQQK                        | 3 | 542.3227  | 1.987 | 0.155 |
| 112 | IPI00294193 | 1 | 36   | 0.7  | 0.14 | 51 | 68 | ITIH4 Isoform 1 of Inter-alpha-trypsin inhibitor heavy chain H4 precu | n[145]NPLVWVHASPEHVVVTR           | 4 | 521.7935  | 3.511 | 0.316 |
| 112 | IPI00294193 | 1 | 36   | 0.7  | 0.14 | 51 | 68 | ITIH4 Isoform 1 of Inter-alpha-trypsin inhibitor heavy chain H4 precu | FKPTLSQQQK                        | 2 | 812.9804  | 3.928 | 0.314 |
| 112 | IPI00294193 | 1 | 36   | 0.7  | 0.14 | 51 | 68 | ITIH4 Isoform 1 of Inter-alpha-trypsin inhibitor heavy chain H4 precu | GPDVLTATVSGK                      | 2 | 712.9091  | 3.601 | 0.403 |
| 112 | IPI00294193 | 1 | 36   | 0.7  | 0.14 | 51 | 68 | ITIH4 Isoform 1 of Inter-alpha-trypsin inhibitor heavy chain H4 precu | GSEMVVAGK                         | 2 | 579.321   | 3.157 | 0.35  |
| 112 | IPI00294193 | 1 | 36   | 0.7  | 0.14 | 51 | 68 | ITIH4 Isoform 1 of Inter-alpha-trypsin inhibitor heavy chain H4 precu | LGVYELLLK                         | 2 | 664.4211  | 3.783 | 0.349 |
| 112 | IPI00294193 | 1 | 36   | 0.7  | 0.14 | 51 | 68 | ITIH4 Isoform 1 of Inter-alpha-trypsin inhibitor heavy chain H4 precu | n[145]ANTVQEATFQM[147]ELPK[272]   | 2 | 1006.0241 | 4.838 | 0.373 |
| 112 | IPI00294193 | 1 | 36   | 0.7  | 0.14 | 51 | 68 | ITIH4 Isoform 1 of Inter-alpha-trypsin inhibitor heavy chain H4 precu | n[145]LGVYELLLK[272]              | 2 | 668.4282  | 2.954 | 0.252 |
| 112 | IPI00294193 | 1 | 36   | 0.7  | 0.14 | 51 | 68 | ITIH4 Isoform 1 of Inter-alpha-trypsin inhibitor heavy chain H4 precu | GKSAGLVK                          | 3 | 393.9239  | 3.478 | 0.236 |
| 112 | IPI00294193 | 1 | 36   | 0.7  | 0.14 | 51 | 68 | ITIH4 Isoform 1 of Inter-alpha-trypsin inhibitor heavy chain H4 precu | n[145]GYFVHYFAPEGLTTM[147]PK[272] | 3 | 754.7218  | 4.43  | 0.402 |
| 112 | IPI00294193 | 1 | 36   | 0.7  | 0.14 | 51 | 68 | ITIH4 Isoform 1 of Inter-alpha-trypsin inhibitor heavy chain H4 precu | n[145]FK[272]PTLSQQQK[272]        | 2 | 818.991   | 3.176 | 0.309 |
| 112 | IPI00294193 | 1 | 36   | 0.7  | 0.14 | 51 | 68 | ITIH4 Isoform 1 of Inter-alpha-trypsin inhibitor heavy chain H4 precu | n[145]GPDVLTATVSGK[272]           | 2 | 716.9162  | 3.112 | 0.39  |
| 112 | IPI00294193 | 1 | 36   | 0.7  | 0.14 | 51 | 68 | ITIH4 Isoform 1 of Inter-alpha-trypsin inhibitor heavy chain H4 precu | n[145]GSEMVVAGK[272]              | 2 | 583.3281  | 3.008 | 0.227 |
| 112 | IPI00294193 | 1 | 36   | 0.7  | 0.14 | 51 | 68 | ITIH4 Isoform 1 of Inter-alpha-trypsin inhibitor heavy chain H4 precu | n[145]GSEM[147]VVAGK[272]         | 2 | 591.3256  | 2.579 | 0.393 |
| 112 | IPI00294193 | 1 | 36   | 0.7  | 0.14 | 51 | 68 | ITIH4 Isoform 1 of Inter-alpha-trypsin inhibitor heavy chain H4 precu | n[145]NGIDIYSLTVDSR               | 2 | 798.9211  | 3.92  | 0.395 |
| 112 | IPI00294193 | 1 | 36   | 0.7  | 0.14 | 51 | 68 | ITIH4 Isoform 1 of Inter-alpha-trypsin inhibitor heavy chain H4 precu | AGFSWIEVTFK                       | 2 | 782.9298  | 3.932 | 0.318 |
| 112 | IPI00294193 | 1 | 36   | 0.7  | 0.14 | 51 | 68 | ITIH4 Isoform 1 of Inter-alpha-trypsin inhibitor heavy chain H4 precu | YYLQGAK                           | 2 | 561.819   | 2.598 | 0.311 |
| 112 | IPI00294193 | 1 | 36   | 0.7  | 0.14 | 51 | 68 | ITIH4 Isoform 1 of Inter-alpha-trypsin inhibitor heavy chain H4 precu | ANTVQEATFQM[147]ELPK              | 3 | 668.3471  | 3.048 | 0.284 |
| 112 | IPI00294193 | 1 | 36   | 0.7  | 0.14 | 51 | 68 | ITIH4 Isoform 1 of Inter-alpha-trypsin inhibitor heavy chain H4 precu | n[145]YIFHNF[147]ER               | 3 | 472.8999  | 2.371 | 0.238 |

|     |             |   |    |     |      |    |    |                                                                           |                             |   |          |       |       |
|-----|-------------|---|----|-----|------|----|----|---------------------------------------------------------------------------|-----------------------------|---|----------|-------|-------|
| 112 | IPI00294193 | 1 | 36 | 0.7 | 0.14 | 51 | 68 | ITIH4 Isoform 1 of Inter-alpha-trypsin inhibitor heavy chain H4 precursor | GSEM[147]VVAGK              | 2 | 587.3185 | 1.915 | 0.175 |
| 112 | IPI00294193 | 1 | 36 | 0.7 | 0.14 | 51 | 68 | ITIH4 Isoform 1 of Inter-alpha-trypsin inhibitor heavy chain H4 precursor | n[145]ITFELVYEELLK[272]     | 2 | 893.0181 | 3.429 | 0.274 |
| 112 | IPI00294193 | 1 | 36 | 0.7 | 0.14 | 51 | 68 | ITIH4 Isoform 1 of Inter-alpha-trypsin inhibitor heavy chain H4 precursor | n[145]NVVVFVIDK[272]        | 2 | 611.3759 | 2.165 | 0.166 |
| 112 | IPI00294193 | 1 | 36 | 0.7 | 0.14 | 51 | 68 | ITIH4 Isoform 1 of Inter-alpha-trypsin inhibitor heavy chain H4 precursor | n[145]YYLQGAK[272]          | 2 | 565.8261 | 2.446 | 0.27  |
| 112 | IPI00294193 | 1 | 36 | 0.7 | 0.14 | 51 | 68 | ITIH4 Isoform 1 of Inter-alpha-trypsin inhibitor heavy chain H4 precursor | n[145]SPEQQETVLDGNLIIR      | 2 | 978.5296 | 4.528 | 0.377 |
| 112 | IPI00294193 | 1 | 36 | 0.7 | 0.14 | 51 | 68 | ITIH4 Isoform 1 of Inter-alpha-trypsin inhibitor heavy chain H4 precursor | NVVFVIDK                    | 2 | 607.3688 | 2.01  | 0.191 |
| 112 | IPI00294193 | 1 | 36 | 0.7 | 0.14 | 51 | 68 | ITIH4 Isoform 1 of Inter-alpha-trypsin inhibitor heavy chain H4 precursor | n[145]LALDNGGLAR            | 2 | 572.3338 | 2.311 | 0.156 |
| 112 | IPI00294193 | 1 | 36 | 0.7 | 0.14 | 51 | 68 | ITIH4 Isoform 1 of Inter-alpha-trypsin inhibitor heavy chain H4 precursor | RLGVYELLK                   | 3 | 495.3168 | 3.25  | 0.11  |
| 112 | IPI00294193 | 1 | 36 | 0.7 | 0.14 | 51 | 68 | ITIH4 Isoform 1 of Inter-alpha-trypsin inhibitor heavy chain H4 precursor | LALDNGGLAR                  | 2 | 570.3302 | 2.289 | 0.043 |
| 112 | IPI00294193 | 1 | 36 | 0.7 | 0.14 | 51 | 68 | ITIH4 Isoform 1 of Inter-alpha-trypsin inhibitor heavy chain H4 precursor | n[145]FAHTVVTSR             | 2 | 581.3285 | 2.178 | 0.236 |
| 112 | IPI00294193 | 1 | 36 | 0.7 | 0.14 | 51 | 68 | ITIH4 Isoform 1 of Inter-alpha-trypsin inhibitor heavy chain H4 precursor | n[145]YIFHNFMER             | 2 | 700.8487 | 2.717 | 0.166 |
| 112 | IPI00294193 | 1 | 36 | 0.7 | 0.14 | 51 | 68 | ITIH4 Isoform 1 of Inter-alpha-trypsin inhibitor heavy chain H4 precursor | ETLFSVMPGLK                 | 3 | 501.2864 | 2.829 | 0.124 |
| 112 | IPI00294193 | 1 | 36 | 0.7 | 0.14 | 51 | 68 | ITIH4 Isoform 1 of Inter-alpha-trypsin inhibitor heavy chain H4 precursor | n[145]ILDDLSPR              | 2 | 536.8096 | 2.837 | 0.092 |
| 112 | IPI00294193 | 1 | 36 | 0.7 | 0.14 | 51 | 68 | ITIH4 Isoform 1 of Inter-alpha-trypsin inhibitor heavy chain H4 precursor | n[145]YIFHNFMR[147]ER       | 2 | 708.8462 | 2.401 | 0.183 |
| 112 | IPI00294193 | 1 | 36 | 0.7 | 0.14 | 51 | 68 | ITIH4 Isoform 1 of Inter-alpha-trypsin inhibitor heavy chain H4 precursor | KPTLSQQQK                   | 3 | 493.2999 | 3.31  | 0.253 |
| 112 | IPI00294193 | 1 | 36 | 0.7 | 0.14 | 51 | 68 | ITIH4 Isoform 1 of Inter-alpha-trypsin inhibitor heavy chain H4 precursor | n[145]ETLFSVMPGLK[272]      | 3 | 503.9578 | 2.729 | 0.11  |
| 112 | IPI00294193 | 1 | 36 | 0.7 | 0.14 | 51 | 68 | ITIH4 Isoform 1 of Inter-alpha-trypsin inhibitor heavy chain H4 precursor | n[145]ETLFSVM[147]PGLK[272] | 3 | 509.2895 | 2.297 | 0.107 |
| 112 | IPI00294193 | 1 | 36 | 0.7 | 0.14 | 51 | 68 | ITIH4 Isoform 1 of Inter-alpha-trypsin inhibitor heavy chain H4 precursor | SAGLVK                      | 2 | 427.7766 | 2.094 | 0.081 |
| 112 | IPI00294193 | 1 | 36 | 0.7 | 0.14 | 51 | 68 | ITIH4 Isoform 1 of Inter-alpha-trypsin inhibitor heavy chain H4 precursor | n[145]GK[272]SAGLVK[272]    | 3 | 397.931  | 3.026 | 0.097 |
| 112 | IPI00294193 | 1 | 36 | 0.7 | 0.14 | 51 | 68 | ITIH4 Isoform 1 of Inter-alpha-trypsin inhibitor heavy chain H4 precursor | n[145]RLGVYELLK[272]        | 3 | 497.9882 | 2.703 | 0.069 |
| 112 | IPI00294193 | 1 | 36 | 0.7 | 0.14 | 51 | 68 | ITIH4 Isoform 1 of Inter-alpha-trypsin inhibitor heavy chain H4 precursor | IPKPEASFSPR                 | 3 | 503.6243 | 2.035 | 0.135 |
| 112 | IPI00294193 | 1 | 36 | 0.7 | 0.14 | 51 | 68 | ITIH4 Isoform 1 of Inter-alpha-trypsin inhibitor heavy chain H4 precursor | n[145]IPK[272]PEASFSPR      | 2 | 758.94   | 1.694 | 0.205 |
| 112 | IPI00294193 | 1 | 36 | 0.7 | 0.14 | 51 | 68 | ITIH4 Isoform 1 of Inter-alpha-trypsin inhibitor heavy chain H4 precursor | n[145]ITFELVYEELLK[272]     | 3 | 595.6811 | 2.701 | 0.158 |
| 112 | IPI00294193 | 1 | 36 | 0.7 | 0.14 | 51 | 68 | ITIH4 Isoform 1 of Inter-alpha-trypsin inhibitor heavy chain H4 precursor | ASPEHVVVTR                  | 3 | 412.2349 | 2.659 | 0.256 |
| 112 | IPI00294193 | 1 | 36 | 0.7 | 0.14 | 51 | 68 | ITIH4 Isoform 1 of Inter-alpha-trypsin inhibitor heavy chain H4 precursor | n[145]FAHTVVTSR             | 3 | 387.8881 | 1.829 | 0.14  |
| 112 | IPI00294193 | 1 | 36 | 0.7 | 0.14 | 51 | 68 | ITIH4 Isoform 1 of Inter-alpha-trypsin inhibitor heavy chain H4 precursor | TGLLLLSDPDK                 | 2 | 726.4271 | 1.808 | 0.124 |
| 112 | IPI00294193 | 1 | 36 | 0.7 | 0.14 | 51 | 68 | ITIH4 Isoform 1 of Inter-alpha-trypsin inhibitor heavy chain H4 precursor | n[145]LGVYELLK[272]         | 3 | 445.9545 | 3.013 | 0.035 |
| 112 | IPI00294193 | 1 | 36 | 0.7 | 0.14 | 51 | 68 | ITIH4 Isoform 1 of Inter-alpha-trypsin inhibitor heavy chain H4 precursor | n[145]EQQETVLDGNLIIR        | 2 | 886.4872 | 4.618 | 0.339 |
| 112 | IPI00294193 | 1 | 36 | 0.7 | 0.14 | 51 | 68 | ITIH4 Isoform 1 of Inter-alpha-trypsin inhibitor heavy chain H4 precursor | n[145]GK[272]SAGLVK[272]    | 2 | 596.3929 | 2.669 | 0.143 |
| 112 | IPI00294193 | 1 | 36 | 0.7 | 0.14 | 51 | 68 | ITIH4 Isoform 1 of Inter-alpha-trypsin inhibitor heavy chain H4 precursor | n[145]DVLTVTSVGK[272]       | 2 | 639.879  | 3.211 | 0.364 |
| 112 | IPI00294193 | 1 | 36 | 0.7 | 0.14 | 51 | 68 | ITIH4 Isoform 1 of Inter-alpha-trypsin inhibitor heavy chain H4 precursor | DVLTVTSVGK                  | 2 | 635.8719 | 3.276 | 0.313 |
| 112 | IPI00294193 | 1 | 36 | 0.7 | 0.14 | 51 | 68 | ITIH4 Isoform 1 of Inter-alpha-trypsin inhibitor heavy chain H4 precursor | n[145]ASPEHVVVTR            | 3 | 413.5706 | 2.214 | 0.09  |
| 112 | IPI00294193 | 1 | 36 | 0.7 | 0.14 | 51 | 68 | ITIH4 Isoform 1 of Inter-alpha-trypsin inhibitor heavy chain H4 precursor | n[145]GPDVLTATVSGK[272]     | 3 | 478.2799 | 1.851 | 0.236 |
| 112 | IPI00294193 | 1 | 36 | 0.7 | 0.14 | 51 | 68 | ITIH4 Isoform 1 of Inter-alpha-trypsin inhibitor heavy chain H4 precursor | n[145]ASPEHVVVTR            | 2 | 619.8523 | 3.187 | 0.406 |
| 112 | IPI00294193 | 1 | 36 | 0.7 | 0.14 | 51 | 68 | ITIH4 Isoform 1 of Inter-alpha-trypsin inhibitor heavy chain H4 precursor | n[145]AGFSWIEVTFK           | 2 | 784.9333 | 2.937 | 0.137 |
| 112 | IPI00294193 | 1 | 36 | 0.7 | 0.14 | 51 | 68 | ITIH4 Isoform 1 of Inter-alpha-trypsin inhibitor heavy chain H4 precursor | ITFELVYEELLK                | 3 | 593.0097 | 2.541 | 0.114 |
| 112 | IPI00294193 | 1 | 36 | 0.7 | 0.14 | 51 | 68 | ITIH4 Isoform 1 of Inter-alpha-trypsin inhibitor heavy chain H4 precursor | n[145]PEQGVVETGQYER         | 2 | 818.4084 | 3.286 | 0.191 |
| 112 | IPI00294193 | 1 | 36 | 0.7 | 0.14 | 51 | 68 | ITIH4 Isoform 1 of Inter-alpha-trypsin inhibitor heavy chain H4 precursor | n[145]PTVGETNPR             | 2 | 557.8023 | 2.412 | 0.24  |
| 112 | IPI00294193 | 1 | 36 | 0.7 | 0.14 | 51 | 68 | ITIH4 Isoform 1 of Inter-alpha-trypsin inhibitor heavy chain H4 precursor | n[145]GVYELLK[272]          | 2 | 611.8861 | 3.001 | 0.124 |
| 112 | IPI00294193 | 1 | 36 | 0.7 | 0.14 | 51 | 68 | ITIH4 Isoform 1 of Inter-alpha-trypsin inhibitor heavy chain H4 precursor | GKSAGLVK                    | 2 | 590.3823 | 1.769 | 0.117 |
| 112 | IPI00294193 | 1 | 36 | 0.7 | 0.14 | 51 | 68 | ITIH4 Isoform 1 of Inter-alpha-trypsin inhibitor heavy chain H4 precursor | n[145]EK[272]NGIDIYSLTVDSR  | 2 | 999.541  | 3.973 | 0.398 |
| 112 | IPI00294193 | 1 | 36 | 0.7 | 0.14 | 51 | 68 | ITIH4 Isoform 1 of Inter-alpha-trypsin inhibitor heavy chain H4 precursor | n[145]NPLVWVH               | 2 | 504.791  | 1.941 | 0.296 |
| 112 | IPI00294193 | 1 | 36 | 0.7 | 0.14 | 51 | 68 | ITIH4 Isoform 1 of Inter-alpha-trypsin inhibitor heavy chain H4 precursor | n[145]LDNGGLAR              | 2 | 480.2732 | 1.943 | 0.069 |
| 112 | IPI00294193 | 1 | 36 | 0.7 | 0.14 | 51 | 68 | ITIH4 Isoform 1 of Inter-alpha-trypsin inhibitor heavy chain H4 precursor | n[145]VPDHAAYHPFR           | 4 | 364.1919 | 2.422 | 0.099 |
| 112 | IPI00294193 | 1 | 36 | 0.7 | 0.14 | 51 | 68 | ITIH4 Isoform 1 of Inter-alpha-trypsin inhibitor heavy chain H4 precursor | n[145]WKETLFSVM[147]PGLK    | 3 | 659.3769 | 4.075 | 0.334 |
| 112 | IPI00294193 | 1 | 36 | 0.7 | 0.14 | 51 | 68 | ITIH4 Isoform 1 of Inter-alpha-trypsin inhibitor heavy chain H4 precursor | n[145]FSSHVGGTGLGQF         | 2 | 690.8551 | 2.617 | 0.303 |
| 112 | IPI00294193 | 1 | 36 | 0.7 | 0.14 | 51 | 68 | ITIH4 Isoform 1 of Inter-alpha-trypsin inhibitor heavy chain H4 precursor | HLQM[147]DIH                | 3 | 350.5114 | 2.378 | 0.095 |
| 112 | IPI00294193 | 1 | 36 | 0.7 | 0.14 | 51 | 68 | ITIH4 Isoform 1 of Inter-alpha-trypsin inhibitor heavy chain H4 precursor | IPKPEASFSPR                 | 2 | 754.9329 | 1.217 | 0.062 |



|     |             |   |      |      |      |    |    |                                                                          |                                   |   |          |       |       |
|-----|-------------|---|------|------|------|----|----|--------------------------------------------------------------------------|-----------------------------------|---|----------|-------|-------|
| 112 | IPI00294193 | 1 | 36   | 0.7  | 0.14 | 51 | 68 | ITI4 Isoform 1 of Inter-alpha-trypsin inhibitor heavy chain H4 precursor | ASPEHVVVTR                        | 2 | 617.8488 | 2.549 | 0.159 |
| 112 | IPI00294193 | 1 | 36   | 0.7  | 0.14 | 51 | 68 | ITI4 Isoform 1 of Inter-alpha-trypsin inhibitor heavy chain H4 precursor | EKNGIDIYSLTVDSR                   | 3 | 664.025  | 2.478 | 0.158 |
| 112 | IPI00294193 | 1 | 36   | 0.7  | 0.14 | 51 | 68 | ITI4 Isoform 1 of Inter-alpha-trypsin inhibitor heavy chain H4 precursor | n[145]HLQM[147]DIH                | 3 | 351.8471 | 1.653 | 0.128 |
| 112 | IPI00294193 | 1 | 36   | 0.7  | 0.14 | 51 | 68 | ITI4 Isoform 1 of Inter-alpha-trypsin inhibitor heavy chain H4 precursor | AEAQAQYSAA                        | 2 | 575.2804 | 1.364 | 0.155 |
| 113 | IPI00294395 | 1 | 35.9 | 0.69 | 0.07 | 36 | 30 | C8B Complement component C8 beta chain precursor                         | GDYTLNNVHACAK                     | 2 | 866.4189 | 4.832 | 0.563 |
| 113 | IPI00294395 | 1 | 35.9 | 0.69 | 0.07 | 36 | 30 | C8B Complement component C8 beta chain precursor                         | n[145]GDYTLNNVHACAK[272]          | 2 | 870.426  | 5.294 | 0.551 |
| 113 | IPI00294395 | 1 | 35.9 | 0.69 | 0.07 | 36 | 30 | C8B Complement component C8 beta chain precursor                         | EVSSCHCAPCQNGVPVLK                | 3 | 782.6833 | 4.543 | 0.488 |
| 113 | IPI00294395 | 1 | 35.9 | 0.69 | 0.07 | 36 | 30 | C8B Complement component C8 beta chain precursor                         | KPYNVESYTPQTQGK                   | 3 | 720.7198 | 4.824 | 0.404 |
| 113 | IPI00294395 | 1 | 35.9 | 0.69 | 0.07 | 36 | 30 | C8B Complement component C8 beta chain precursor                         | n[145]EVSSCHCAPCQNGVPVLK[272]     | 3 | 785.3547 | 4.723 | 0.512 |
| 113 | IPI00294395 | 1 | 35.9 | 0.69 | 0.07 | 36 | 30 | C8B Complement component C8 beta chain precursor                         | n[145]RLPLEYSYGEYR                | 3 | 563.9621 | 2.326 | 0.231 |
| 113 | IPI00294395 | 1 | 35.9 | 0.69 | 0.07 | 36 | 30 | C8B Complement component C8 beta chain precursor                         | n[145]VEPLYELVTATDFAYSSTVR        | 3 | 802.4167 | 4.892 | 0.437 |
| 113 | IPI00294395 | 1 | 35.9 | 0.69 | 0.07 | 36 | 30 | C8B Complement component C8 beta chain precursor                         | GDYTLNNVHACAK                     | 3 | 577.9484 | 2.895 | 0.307 |
| 113 | IPI00294395 | 1 | 35.9 | 0.69 | 0.07 | 36 | 30 | C8B Complement component C8 beta chain precursor                         | KNTPIDGK                          | 3 | 431.5944 | 3.063 | 0.267 |
| 113 | IPI00294395 | 1 | 35.9 | 0.69 | 0.07 | 36 | 30 | C8B Complement component C8 beta chain precursor                         | n[145]GDYTLNNVHACAK[272]          | 3 | 580.6198 | 3.301 | 0.27  |
| 113 | IPI00294395 | 1 | 35.9 | 0.69 | 0.07 | 36 | 30 | C8B Complement component C8 beta chain precursor                         | n[145]YAYLLQPSQFHGEPNFSK[272]     | 3 | 893.4256 | 3.493 | 0.371 |
| 113 | IPI00294395 | 1 | 35.9 | 0.69 | 0.07 | 36 | 30 | C8B Complement component C8 beta chain precursor                         | n[145]DTMVEDLVVLR                 | 2 | 766.9274 | 3.748 | 0.424 |
| 113 | IPI00294395 | 1 | 35.9 | 0.69 | 0.07 | 36 | 30 | C8B Complement component C8 beta chain precursor                         | n[145]SGFSFGFK[272]               | 2 | 582.8183 | 2.939 | 0.332 |
| 113 | IPI00294395 | 1 | 35.9 | 0.69 | 0.07 | 36 | 30 | C8B Complement component C8 beta chain precursor                         | VKVEPLYELVTATDFAYSSTVR            | 3 | 923.5005 | 2.936 | 0.409 |
| 113 | IPI00294395 | 1 | 35.9 | 0.69 | 0.07 | 36 | 30 | C8B Complement component C8 beta chain precursor                         | n[145]CEGFVCAQTGR                 | 2 | 703.7939 | 2.973 | 0.265 |
| 113 | IPI00294395 | 1 | 35.9 | 0.69 | 0.07 | 36 | 30 | C8B Complement component C8 beta chain precursor                         | n[145]NTPIDGK[272]                | 2 | 516.8001 | 2.032 | 0.262 |
| 113 | IPI00294395 | 1 | 35.9 | 0.69 | 0.07 | 36 | 30 | C8B Complement component C8 beta chain precursor                         | n[145]EYESYSDFER                  | 2 | 734.8211 | 2.427 | 0.276 |
| 113 | IPI00294395 | 1 | 35.9 | 0.69 | 0.07 | 36 | 30 | C8B Complement component C8 beta chain precursor                         | NTPIDGK                           | 2 | 512.793  | 1.814 | 0.257 |
| 113 | IPI00294395 | 1 | 35.9 | 0.69 | 0.07 | 36 | 30 | C8B Complement component C8 beta chain precursor                         | n[145]GILNEIK[272]DR              | 3 | 449.2729 | 1.96  | 0.002 |
| 113 | IPI00294395 | 1 | 35.9 | 0.69 | 0.07 | 36 | 30 | C8B Complement component C8 beta chain precursor                         | KNTPIDGK                          | 2 | 646.8879 | 1.919 | 0.18  |
| 113 | IPI00294395 | 1 | 35.9 | 0.69 | 0.07 | 36 | 30 | C8B Complement component C8 beta chain precursor                         | n[145]DTM[147]VEDLVVLR            | 2 | 774.9248 | 2.032 | 0.217 |
| 113 | IPI00294395 | 1 | 35.9 | 0.69 | 0.07 | 36 | 30 | C8B Complement component C8 beta chain precursor                         | n[145]YEFILK[272]                 | 2 | 550.8334 | 2.264 | 0.073 |
| 113 | IPI00294395 | 1 | 35.9 | 0.69 | 0.07 | 36 | 30 | C8B Complement component C8 beta chain precursor                         | n[145]GINLFTNSFEGPVLDR            | 3 | 687.3609 | 3.531 | 0.311 |
| 113 | IPI00294395 | 1 | 35.9 | 0.69 | 0.07 | 36 | 30 | C8B Complement component C8 beta chain precursor                         | n[145]GILNEIK[272]                | 2 | 537.8417 | 2.381 | 0.024 |
| 113 | IPI00294395 | 1 | 35.9 | 0.69 | 0.07 | 36 | 30 | C8B Complement component C8 beta chain precursor                         | n[145]QALEEFQK[272]               | 2 | 640.8581 | 2.236 | 0.053 |
| 113 | IPI00294395 | 1 | 35.9 | 0.69 | 0.07 | 36 | 30 | C8B Complement component C8 beta chain precursor                         | GIFELGISSQSDR                     | 2 | 774.9045 | 3.702 | 0.439 |
| 113 | IPI00294395 | 1 | 35.9 | 0.69 | 0.07 | 36 | 30 | C8B Complement component C8 beta chain precursor                         | YEFILK                            | 2 | 546.8263 | 2.149 | 0.142 |
| 113 | IPI00294395 | 1 | 35.9 | 0.69 | 0.07 | 36 | 30 | C8B Complement component C8 beta chain precursor                         | n[145]GIFELGISSQSDR               | 2 | 776.908  | 3.399 | 0.388 |
| 113 | IPI00294395 | 1 | 35.9 | 0.69 | 0.07 | 36 | 30 | C8B Complement component C8 beta chain precursor                         | n[145]GDYTLNNVHAC                 | 2 | 698.8089 | 2.879 | 0.278 |
| 113 | IPI00294395 | 1 | 35.9 | 0.69 | 0.07 | 36 | 30 | C8B Complement component C8 beta chain precursor                         | n[145]YYAGGCSPH                   | 2 | 572.7373 | 2.15  | 0.321 |
| 113 | IPI00294395 | 1 | 35.9 | 0.69 | 0.07 | 36 | 30 | C8B Complement component C8 beta chain precursor                         | n[145]LEYSYGEYR                   | 2 | 662.3205 | 2.21  | 0.108 |
| 114 | IPI00296165 | 1 | 27.1 | 0.77 | 0.09 | 55 | 34 | C1R;ACYP1;C17orf13 Complement C1r subcomponent precursor                 | IQYYCHEPYK                        | 2 | 916.9286 | 4.326 | 0.401 |
| 114 | IPI00296165 | 1 | 27.1 | 0.77 | 0.09 | 55 | 34 | C1R;ACYP1;C17orf13 Complement C1r subcomponent precursor                 | n[145]DYFIATCK[272]               | 2 | 647.8244 | 3.223 | 0.43  |
| 114 | IPI00296165 | 1 | 27.1 | 0.77 | 0.09 | 55 | 34 | C1R;ACYP1;C17orf13 Complement C1r subcomponent precursor                 | n[145]FCGQLGSPGNPPGK[272]K[272]   | 3 | 693.3799 | 4.235 | 0.425 |
| 114 | IPI00296165 | 1 | 27.1 | 0.77 | 0.09 | 55 | 34 | C1R;ACYP1;C17orf13 Complement C1r subcomponent precursor                 | n[145]MDVFSQNM[147]FCAGHPSLK[272] | 3 | 754.6855 | 3.963 | 0.501 |
| 114 | IPI00296165 | 1 | 27.1 | 0.77 | 0.09 | 55 | 34 | C1R;ACYP1;C17orf13 Complement C1r subcomponent precursor                 | FCGQLGSPGNPPGKK                   | 3 | 689.3728 | 2.952 | 0.375 |
| 114 | IPI00296165 | 1 | 27.1 | 0.77 | 0.09 | 55 | 34 | C1R;ACYP1;C17orf13 Complement C1r subcomponent precursor                 | n[145]CLPVCCK[272]PVNPVEQR        | 3 | 673.6799 | 2.766 | 0.155 |
| 114 | IPI00296165 | 1 | 27.1 | 0.77 | 0.09 | 55 | 34 | C1R;ACYP1;C17orf13 Complement C1r subcomponent precursor                 | n[145]IQYYCHEPYK[272]             | 3 | 614.2929 | 3.456 | 0.275 |
| 114 | IPI00296165 | 1 | 27.1 | 0.77 | 0.09 | 55 | 34 | C1R;ACYP1;C17orf13 Complement C1r subcomponent precursor                 | n[145]TLDEFTIINLQPQYQFR           | 3 | 800.089  | 3.389 | 0.331 |
| 114 | IPI00296165 | 1 | 27.1 | 0.77 | 0.09 | 55 | 34 | C1R;ACYP1;C17orf13 Complement C1r subcomponent precursor                 | DYFIATCK                          | 2 | 643.8173 | 2.631 | 0.352 |
| 114 | IPI00296165 | 1 | 27.1 | 0.77 | 0.09 | 55 | 34 | C1R;ACYP1;C17orf13 Complement C1r subcomponent precursor                 | IQYYCHEPYK                        | 3 | 611.6215 | 3.299 | 0.208 |
| 114 | IPI00296165 | 1 | 27.1 | 0.77 | 0.09 | 55 | 34 | C1R;ACYP1;C17orf13 Complement C1r subcomponent precursor                 | n[145]GGGALLGDR                   | 2 | 480.2732 | 3.618 | 0.204 |
| 114 | IPI00296165 | 1 | 27.1 | 0.77 | 0.09 | 55 | 34 | C1R;ACYP1;C17orf13 Complement C1r subcomponent precursor                 | n[145]IQYYCHEPYK[272]             | 2 | 920.9357 | 3.822 | 0.359 |
| 114 | IPI00296165 | 1 | 27.1 | 0.77 | 0.09 | 55 | 34 | C1R;ACYP1;C17orf13 Complement C1r subcomponent precursor                 | n[145]VLNYVDWIK[272]              | 2 | 719.4209 | 3.279 | 0.307 |

|     |             |   |      |      |      |    |    |                                                          |                             |   |           |       |       |
|-----|-------------|---|------|------|------|----|----|----------------------------------------------------------|-----------------------------|---|-----------|-------|-------|
| 114 | IPI00296165 | 1 | 27.1 | 0.77 | 0.09 | 55 | 34 | C1R;ACYP1;C17orf13 Complement C1r subcomponent precursor | CLPVCCKPVNPVEQR             | 3 | 671.0085  | 2.782 | 0.1   |
| 114 | IPI00296165 | 1 | 27.1 | 0.77 | 0.09 | 55 | 34 | C1R;ACYP1;C17orf13 Complement C1r subcomponent precursor | n[145]YTTEIHK[272]          | 2 | 578.3468  | 2.366 | 0.167 |
| 114 | IPI00296165 | 1 | 27.1 | 0.77 | 0.09 | 55 | 34 | C1R;ACYP1;C17orf13 Complement C1r subcomponent precursor | n[145]LGNHPIR               | 2 | 475.7863  | 2.354 | 0.16  |
| 114 | IPI00296165 | 1 | 27.1 | 0.77 | 0.09 | 55 | 34 | C1R;ACYP1;C17orf13 Complement C1r subcomponent precursor | NIGEFCKGK                   | 2 | 597.2939  | 2.304 | 0.186 |
| 114 | IPI00296165 | 1 | 27.1 | 0.77 | 0.09 | 55 | 34 | C1R;ACYP1;C17orf13 Complement C1r subcomponent precursor | LGNHPIR                     | 2 | 473.7827  | 2.277 | 0.171 |
| 114 | IPI00296165 | 1 | 27.1 | 0.77 | 0.09 | 55 | 34 | C1R;ACYP1;C17orf13 Complement C1r subcomponent precursor | n[145]NIGEFCKGK[272]        | 2 | 601.301   | 2.129 | 0.161 |
| 114 | IPI00296165 | 1 | 27.1 | 0.77 | 0.09 | 55 | 34 | C1R;ACYP1;C17orf13 Complement C1r subcomponent precursor | M[147]DVFSQNM[147]FCAGHPSLK | 3 | 757.3457  | 2.377 | 0.17  |
| 114 | IPI00296165 | 1 | 27.1 | 0.77 | 0.09 | 55 | 34 | C1R;ACYP1;C17orf13 Complement C1r subcomponent precursor | n[145]EFM[147]SQGNK[272]    | 2 | 622.8128  | 1.901 | 0.178 |
| 114 | IPI00296165 | 1 | 27.1 | 0.77 | 0.09 | 55 | 34 | C1R;ACYP1;C17orf13 Complement C1r subcomponent precursor | n[145]NLPNGDFR              | 2 | 538.7839  | 1.765 | 0.022 |
| 114 | IPI00296165 | 1 | 27.1 | 0.77 | 0.09 | 55 | 34 | C1R;ACYP1;C17orf13 Complement C1r subcomponent precursor | MDVFSQNM[147]FCAGHPSLK      | 3 | 752.0141  | 4.144 | 0.386 |
| 114 | IPI00296165 | 1 | 27.1 | 0.77 | 0.09 | 55 | 34 | C1R;ACYP1;C17orf13 Complement C1r subcomponent precursor | VLNYVDWIK[272]              | 2 | 717.4173  | 2.962 | 0.242 |
| 114 | IPI00296165 | 1 | 27.1 | 0.77 | 0.09 | 55 | 34 | C1R;ACYP1;C17orf13 Complement C1r subcomponent precursor | n[145]QDACQGDSSGGVFAVR      | 2 | 850.3861  | 2.362 | 0.233 |
| 114 | IPI00296165 | 1 | 27.1 | 0.77 | 0.09 | 55 | 34 | C1R;ACYP1;C17orf13 Complement C1r subcomponent precursor | n[145]LFGEVTSPLFPK[272]     | 2 | 811.9735  | 3.62  | 0.374 |
| 114 | IPI00296165 | 1 | 27.1 | 0.77 | 0.09 | 55 | 34 | C1R;ACYP1;C17orf13 Complement C1r subcomponent precursor | LFGEVTSPLFPK                | 2 | 807.9664  | 3.501 | 0.383 |
| 114 | IPI00296165 | 1 | 27.1 | 0.77 | 0.09 | 55 | 34 | C1R;ACYP1;C17orf13 Complement C1r subcomponent precursor | n[145]IAHDLR                | 2 | 434.7597  | 1.881 | 0.021 |
| 114 | IPI00296165 | 1 | 27.1 | 0.77 | 0.09 | 55 | 34 | C1R;ACYP1;C17orf13 Complement C1r subcomponent precursor | n[145]VSVHPDYR              | 2 | 558.7996  | 1.736 | 0.009 |
| 114 | IPI00296165 | 1 | 27.1 | 0.77 | 0.09 | 55 | 34 | C1R;ACYP1;C17orf13 Complement C1r subcomponent precursor | n[145]CLPVCCKGK[272]        | 2 | 550.2724  | 2.234 | 0.249 |
| 114 | IPI00296165 | 1 | 27.1 | 0.77 | 0.09 | 55 | 34 | C1R;ACYP1;C17orf13 Complement C1r subcomponent precursor | CLPVCCKGK                   | 2 | 546.2653  | 2.086 | 0.222 |
| 114 | IPI00296165 | 1 | 27.1 | 0.77 | 0.09 | 55 | 34 | C1R;ACYP1;C17orf13 Complement C1r subcomponent precursor | n[145]PGYELQEDR             | 2 | 625.8103  | 2.491 | 0.181 |
| 114 | IPI00296165 | 1 | 27.1 | 0.77 | 0.09 | 55 | 34 | C1R;ACYP1;C17orf13 Complement C1r subcomponent precursor | n[145]LGNHPIR               | 3 | 317.5266  | 1.559 | 0.025 |
| 114 | IPI00296165 | 1 | 27.1 | 0.77 | 0.09 | 55 | 34 | C1R;ACYP1;C17orf13 Complement C1r subcomponent precursor | GSPLGNPPGKK                 | 3 | 491.2963  | 2.415 | 0.132 |
| 114 | IPI00296165 | 1 | 27.1 | 0.77 | 0.09 | 55 | 34 | C1R;ACYP1;C17orf13 Complement C1r subcomponent precursor | n[145]PVNPVEQR              | 2 | 541.8074  | 1.467 | 0.18  |
| 115 | IPI00296176 | 1 | 8.2  | 0.78 | 0.15 | 5  | 3  | F9 Coagulation factor IX precursor                       | n[145]SALVLQYLR             | 2 | 603.87    | 3.554 | 0.389 |
| 115 | IPI00296176 | 1 | 8.2  | 0.78 | 0.15 | 5  | 3  | F9 Coagulation factor IX precursor                       | n[145]SCEPAVPFPCGR          | 2 | 749.8252  | 2.716 | 0.235 |
| 115 | IPI00296176 | 1 | 8.2  | 0.78 | 0.15 | 5  | 3  | F9 Coagulation factor IX precursor                       | n[145]YGIYTK[272]           | 2 | 516.8021  | 2.207 | 0.24  |
| 115 | IPI00296176 | 1 | 8.2  | 0.78 | 0.15 | 5  | 3  | F9 Coagulation factor IX precursor                       | GKYGIYTK                    | 3 | 450.6029  | 2.629 | 0.155 |
| 115 | IPI00296176 | 1 | 8.2  | 0.78 | 0.15 | 5  | 3  | F9 Coagulation factor IX precursor                       | n[145]CAGFHEGGR             | 3 | 375.168   | 2.78  | 0.259 |
| 115 | IPI00296176 | 1 | 8.2  | 0.78 | 0.15 | 5  | 3  | F9 Coagulation factor IX precursor                       | CAGFHEGGR                   | 2 | 560.2448  | 1.838 | 0.057 |
| 116 | IPI00296534 | 1 | 8    | 1.01 | 0.05 | 2  | 9  | FBLN1 Isoform D of Fibulin-1 precursor                   | GYHLNEEGTR                  | 3 | 439.2178  | 2.718 | 0.267 |
| 116 | IPI00296534 | 1 | 8    | 1.01 | 0.05 | 2  | 9  | FBLN1 Isoform D of Fibulin-1 precursor                   | GYHLNEEGTR                  | 2 | 658.3231  | 3.381 | 0.441 |
| 116 | IPI00296534 | 1 | 8    | 1.01 | 0.05 | 2  | 9  | FBLN1 Isoform D of Fibulin-1 precursor                   | n[145]TGYFFDGISR            | 2 | 661.8285  | 3.472 | 0.317 |
| 116 | IPI00296534 | 1 | 8    | 1.01 | 0.05 | 2  | 9  | FBLN1 Isoform D of Fibulin-1 precursor                   | SAATLQKEK                   | 2 | 628.3539  | 3.12  | 0.209 |
| 116 | IPI00296534 | 1 | 8    | 1.01 | 0.05 | 2  | 9  | FBLN1 Isoform D of Fibulin-1 precursor                   | n[145]GYHLNEEGTR            | 2 | 660.3267  | 3.053 | 0.323 |
| 116 | IPI00296534 | 1 | 8    | 1.01 | 0.05 | 2  | 9  | FBLN1 Isoform D of Fibulin-1 precursor                   | n[145]GYHLNEEGTR            | 3 | 440.5535  | 2.216 | 0.23  |
| 116 | IPI00296534 | 1 | 8    | 1.01 | 0.05 | 2  | 9  | FBLN1 Isoform D of Fibulin-1 precursor                   | TGYFFDGISR                  | 2 | 659.825   | 2.693 | 0.292 |
| 116 | IPI00296534 | 1 | 8    | 1.01 | 0.05 | 2  | 9  | FBLN1 Isoform D of Fibulin-1 precursor                   | NVPNCGR                     | 2 | 473.2233  | 1.645 | 0.029 |
| 116 | IPI00296534 | 1 | 8    | 1.01 | 0.05 | 2  | 9  | FBLN1 Isoform D of Fibulin-1 precursor                   | SCPSSGYR                    | 2 | 521.7259  | 2.538 | 0.179 |
| 116 | IPI00296534 | 1 | 8    | 1.01 | 0.05 | 2  | 9  | FBLN1 Isoform D of Fibulin-1 precursor                   | AITPPHPASQAN                | 2 | 672.357   | 1.83  | 0.085 |
| 117 | IPI00296608 | 1 | 31.8 | 0.66 | 0.08 | 54 | 38 | C7 Complement component C7 precursor                     | SYTSHNTNEIHK                | 2 | 798.9101  | 4.3   | 0.468 |
| 117 | IPI00296608 | 1 | 31.8 | 0.66 | 0.08 | 54 | 38 | C7 Complement component C7 precursor                     | n[145]ELSHLPSLYDYSAYR       | 2 | 979.4925  | 5.162 | 0.386 |
| 117 | IPI00296608 | 1 | 31.8 | 0.66 | 0.08 | 54 | 38 | C7 Complement component C7 precursor                     | n[145]GCPTEEGCGER           | 2 | 687.2574  | 3.447 | 0.49  |
| 117 | IPI00296608 | 1 | 31.8 | 0.66 | 0.08 | 54 | 38 | C7 Complement component C7 precursor                     | n[145]NVVYTCNEGYSIGNPVAR    | 2 | 1130.0546 | 5.72  | 0.523 |
| 117 | IPI00296608 | 1 | 31.8 | 0.66 | 0.08 | 54 | 38 | C7 Complement component C7 precursor                     | SYTSHNTNEIHK                | 3 | 532.9425  | 3.737 | 0.389 |
| 117 | IPI00296608 | 1 | 31.8 | 0.66 | 0.08 | 54 | 38 | C7 Complement component C7 precursor                     | n[145]LIDQYGTGYLQSGSLGGEYR  | 3 | 801.0683  | 4.199 | 0.425 |
| 117 | IPI00296608 | 1 | 31.8 | 0.66 | 0.08 | 54 | 38 | C7 Complement component C7 precursor                     | n[145]NVVYTCNEGYSIGNPVAR    | 3 | 753.7055  | 3.914 | 0.33  |
| 117 | IPI00296608 | 1 | 31.8 | 0.66 | 0.08 | 54 | 38 | C7 Complement component C7 precursor                     | n[145]SCVGETTESTQCEDEELEHLR | 3 | 877.6981  | 8.093 | 0.642 |
| 117 | IPI00296608 | 1 | 31.8 | 0.66 | 0.08 | 54 | 38 | C7 Complement component C7 precursor                     | n[145]SYTSHNTNEIHK[272]     | 3 | 535.6139  | 4.534 | 0.385 |
| 117 | IPI00296608 | 1 | 31.8 | 0.66 | 0.08 | 54 | 38 | C7 Complement component C7 precursor                     | n[145]ELSHLPSLYDYSAYR       | 3 | 653.3307  | 3.331 | 0.166 |

|     |             |   |      |      |      |     |    |                                                        |                              |   |           |       |       |
|-----|-------------|---|------|------|------|-----|----|--------------------------------------------------------|------------------------------|---|-----------|-------|-------|
| 117 | IPI00296608 | 1 | 31.8 | 0.66 | 0.08 | 54  | 38 | C7 Complement component C7 precursor                   | VLFYVDSEK                    | 2 | 690.3821  | 3.477 | 0.381 |
| 117 | IPI00296608 | 1 | 31.8 | 0.66 | 0.08 | 54  | 38 | C7 Complement component C7 precursor                   | n[145]AASGTQNNVLR            | 2 | 637.8503  | 3.99  | 0.304 |
| 117 | IPI00296608 | 1 | 31.8 | 0.66 | 0.08 | 54  | 38 | C7 Complement component C7 precursor                   | n[145]VLFYVDSEK[272]         | 2 | 694.3892  | 3.5   | 0.388 |
| 117 | IPI00296608 | 1 | 31.8 | 0.66 | 0.08 | 54  | 38 | C7 Complement component C7 precursor                   | n[145]SYTSHTNEIHK[272]       | 2 | 802.9172  | 3.51  | 0.381 |
| 117 | IPI00296608 | 1 | 31.8 | 0.66 | 0.08 | 54  | 38 | C7 Complement component C7 precursor                   | n[145]LTPLYELVK[272]         | 2 | 682.4256  | 2.795 | 0.296 |
| 117 | IPI00296608 | 1 | 31.8 | 0.66 | 0.08 | 54  | 38 | C7 Complement component C7 precursor                   | n[145]DSCTLPASAEK[272]       | 2 | 728.3567  | 2.876 | 0.302 |
| 117 | IPI00296608 | 1 | 31.8 | 0.66 | 0.08 | 54  | 38 | C7 Complement component C7 precursor                   | n[145]ILPLTVCK[272]          | 2 | 610.8711  | 2.861 | 0.3   |
| 117 | IPI00296608 | 1 | 31.8 | 0.66 | 0.08 | 54  | 38 | C7 Complement component C7 precursor                   | n[145]ECNNPPPSGGGR           | 2 | 687.8042  | 3.09  | 0.296 |
| 117 | IPI00296608 | 1 | 31.8 | 0.66 | 0.08 | 54  | 38 | C7 Complement component C7 precursor                   | LKQDNFNSVEEK                 | 3 | 624.3389  | 4.249 | 0.244 |
| 117 | IPI00296608 | 1 | 31.8 | 0.66 | 0.08 | 54  | 38 | C7 Complement component C7 precursor                   | n[145]EQTM[147]SECEAGALR     | 2 | 815.8532  | 2.878 | 0.334 |
| 117 | IPI00296608 | 1 | 31.8 | 0.66 | 0.08 | 54  | 38 | C7 Complement component C7 precursor                   | n[145]LSGNVLSYTFQVK[272]     | 2 | 872.4978  | 3.409 | 0.304 |
| 117 | IPI00296608 | 1 | 31.8 | 0.66 | 0.08 | 54  | 38 | C7 Complement component C7 precursor                   | QNDFNSVEEK                   | 2 | 745.3677  | 3.397 | 0.238 |
| 117 | IPI00296608 | 1 | 31.8 | 0.66 | 0.08 | 54  | 38 | C7 Complement component C7 precursor                   | n[145]VFSGDGK[272]           | 2 | 499.2815  | 2.053 | 0.292 |
| 117 | IPI00296608 | 1 | 31.8 | 0.66 | 0.08 | 54  | 38 | C7 Complement component C7 precursor                   | n[145]LK[272]QNDFNSVEEK[272] | 3 | 628.346   | 1.983 | 0.204 |
| 117 | IPI00296608 | 1 | 31.8 | 0.66 | 0.08 | 54  | 38 | C7 Complement component C7 precursor                   | KVFSGDGK                     | 2 | 629.3694  | 2.057 | 0.274 |
| 117 | IPI00296608 | 1 | 31.8 | 0.66 | 0.08 | 54  | 38 | C7 Complement component C7 precursor                   | ILPLTVCK                     | 2 | 606.864   | 2.412 | 0.197 |
| 117 | IPI00296608 | 1 | 31.8 | 0.66 | 0.08 | 54  | 38 | C7 Complement component C7 precursor                   | EVPCASVK                     | 2 | 579.8041  | 2.483 | 0.184 |
| 117 | IPI00296608 | 1 | 31.8 | 0.66 | 0.08 | 54  | 38 | C7 Complement component C7 precursor                   | LTPLYELVK                    | 2 | 678.4185  | 2.289 | 0.158 |
| 117 | IPI00296608 | 1 | 31.8 | 0.66 | 0.08 | 54  | 38 | C7 Complement component C7 precursor                   | n[145]ELENALK[272]           | 2 | 552.8288  | 2.499 | 0.106 |
| 117 | IPI00296608 | 1 | 31.8 | 0.66 | 0.08 | 54  | 38 | C7 Complement component C7 precursor                   | n[145]EVPCASVK[272]          | 2 | 583.8112  | 2.171 | 0.138 |
| 117 | IPI00296608 | 1 | 31.8 | 0.66 | 0.08 | 54  | 38 | C7 Complement component C7 precursor                   | n[145]EQTMSECEAGALR          | 2 | 807.8558  | 3.395 | 0.318 |
| 117 | IPI00296608 | 1 | 31.8 | 0.66 | 0.08 | 54  | 38 | C7 Complement component C7 precursor                   | n[145]YSAWAESVTNLPQVIK       | 3 | 697.385   | 3.487 | 0.112 |
| 117 | IPI00296608 | 1 | 31.8 | 0.66 | 0.08 | 54  | 38 | C7 Complement component C7 precursor                   | n[145]SLVPTFCPSPPALK[272]    | 2 | 960.5143  | 3.727 | 0.314 |
| 117 | IPI00296608 | 1 | 31.8 | 0.66 | 0.08 | 54  | 38 | C7 Complement component C7 precursor                   | n[145]QNDFNSVEEK[272]        | 2 | 749.3748  | 1.847 | 0.116 |
| 117 | IPI00296608 | 1 | 31.8 | 0.66 | 0.08 | 54  | 38 | C7 Complement component C7 precursor                   | DSCTLPASAEK                  | 2 | 724.3496  | 1.273 | 0.096 |
| 117 | IPI00296608 | 1 | 31.8 | 0.66 | 0.08 | 54  | 38 | C7 Complement component C7 precursor                   | n[145]SLVPTFCPSPPALK[272]    | 3 | 640.6786  | 3.696 | 0.12  |
| 117 | IPI00296608 | 1 | 31.8 | 0.66 | 0.08 | 54  | 38 | C7 Complement component C7 precursor                   | n[145]LLEPHCFPL              | 2 | 629.8259  | 2.082 | 0.281 |
| 117 | IPI00296608 | 1 | 31.8 | 0.66 | 0.08 | 54  | 38 | C7 Complement component C7 precursor                   | FSSHGCKELENALK               | 3 | 677.0168  | 2.269 | 0.054 |
| 117 | IPI00296608 | 1 | 31.8 | 0.66 | 0.08 | 54  | 38 | C7 Complement component C7 precursor                   | SVK[272]                     | 1 | 617.4104  | 0.88  | 0.378 |
| 117 | IPI00296608 | 1 | 31.8 | 0.66 | 0.08 | 54  | 38 | C7 Complement component C7 precursor                   | EM[147]K                     | 1 | 703.3808  | 1.121 | 0.072 |
| 118 | IPI00297261 | 1 | 4.8  | 0.54 | 0    | 2   | 4  | PTPN1 Tyrosine-protein phosphatase non-receptor type 1 | FIMGDSSVQDQWK[272]           | 3 | 608.9739  | 3.285 | 0.133 |
| 118 | IPI00297261 | 1 | 4.8  | 0.54 | 0    | 2   | 4  | PTPN1 Tyrosine-protein phosphatase non-receptor type 1 | FIMGDSSVQDQWK[272]           | 2 | 912.9572  | 2.807 | 0.01  |
| 118 | IPI00297261 | 1 | 4.8  | 0.54 | 0    | 2   | 4  | PTPN1 Tyrosine-protein phosphatase non-receptor type 1 | n[145]GEPSSLPEK[272]         | 2 | 572.8263  | 2.009 | 0.051 |
| 118 | IPI00297261 | 1 | 4.8  | 0.54 | 0    | 2   | 4  | PTPN1 Tyrosine-protein phosphatase non-receptor type 1 | GEPSSLPEK                    | 2 | 568.8192  | 2.047 | 0.028 |
| 119 | IPI00297550 | 1 | 10.9 | 1.04 | 0.21 | 11  | 10 | F13A1 Coagulation factor XIII A chain precursor        | KDGTHVVENVVDATHIGK           | 3 | 747.4097  | 6.428 | 0.569 |
| 119 | IPI00297550 | 1 | 10.9 | 1.04 | 0.21 | 11  | 10 | F13A1 Coagulation factor XIII A chain precursor        | n[145]DGTHVVENVVDATHIGK[272] | 3 | 660.6845  | 4.619 | 0.485 |
| 119 | IPI00297550 | 1 | 10.9 | 1.04 | 0.21 | 11  | 10 | F13A1 Coagulation factor XIII A chain precursor        | KDGTHVVENVVDATHIGK           | 4 | 560.8091  | 2.928 | 0.417 |
| 119 | IPI00297550 | 1 | 10.9 | 1.04 | 0.21 | 11  | 10 | F13A1 Coagulation factor XIII A chain precursor        | n[145]STVLTIPEIIK[272]       | 2 | 808.0179  | 3.36  | 0.417 |
| 119 | IPI00297550 | 1 | 10.9 | 1.04 | 0.21 | 11  | 10 | F13A1 Coagulation factor XIII A chain precursor        | GTYPVPIVSELQSGK              | 3 | 656.7103  | 3.434 | 0.251 |
| 119 | IPI00297550 | 1 | 10.9 | 1.04 | 0.21 | 11  | 10 | F13A1 Coagulation factor XIII A chain precursor        | KETFDVTLEPLSK                | 3 | 692.0576  | 3.303 | 0.201 |
| 119 | IPI00297550 | 1 | 10.9 | 1.04 | 0.21 | 11  | 10 | F13A1 Coagulation factor XIII A chain precursor        | n[145]GTYPVPIVSELQSGK[272]   | 3 | 659.3817  | 2.783 | 0.237 |
| 119 | IPI00297550 | 1 | 10.9 | 1.04 | 0.21 | 11  | 10 | F13A1 Coagulation factor XIII A chain precursor        | n[145]FQEQEEER               | 2 | 648.3029  | 2.757 | 0.169 |
| 119 | IPI00297550 | 1 | 10.9 | 1.04 | 0.21 | 11  | 10 | F13A1 Coagulation factor XIII A chain precursor        | FQEQEEER                     | 2 | 646.2993  | 2.743 | 0.211 |
| 119 | IPI00297550 | 1 | 10.9 | 1.04 | 0.21 | 11  | 10 | F13A1 Coagulation factor XIII A chain precursor        | n[145]VDHHTDK[272]YENNK[272] | 3 | 644.6694  | 2.437 | 0.145 |
| 120 | IPI00298497 | 1 | 75.6 | 0.86 | 0.1  | 405 | ## | FGB Fibrinogen beta chain precursor                    | QDGSVDFGR                    | 1 | 1120.5382 | 2.635 | 0.384 |
| 120 | IPI00298497 | 1 | 75.6 | 0.86 | 0.1  | 405 | ## | FGB Fibrinogen beta chain precursor                    | n[145]QDGSVDFGR              | 1 | 1124.5453 | 2.462 | 0.446 |
| 120 | IPI00298497 | 1 | 75.6 | 0.86 | 0.1  | 405 | ## | FGB Fibrinogen beta chain precursor                    | AHYGGFTVQNEANK               | 2 | 908.4605  | 5.355 | 0.536 |
| 120 | IPI00298497 | 1 | 75.6 | 0.86 | 0.1  | 405 | ## | FGB Fibrinogen beta chain precursor                    | DNENVVNEYSSELEK              | 2 | 1024.9922 | 6.266 | 0.527 |

|     |             |   |      |      |     |     |    |                                     |                                             |   |           |       |       |
|-----|-------------|---|------|------|-----|-----|----|-------------------------------------|---------------------------------------------|---|-----------|-------|-------|
| 120 | IPI00298497 | 1 | 75.6 | 0.86 | 0.1 | 405 | ## | FGB Fibrinogen beta chain precursor | EEAPSLRPAPPPISGGGYR                         | 2 | 1046.0527 | 3.64  | 0.47  |
| 120 | IPI00298497 | 1 | 75.6 | 0.86 | 0.1 | 405 | ## | FGB Fibrinogen beta chain precursor | GGETSEM[147]YLIQPDSSVKPYR                   | 2 | 1277.1364 | 4.691 | 0.561 |
| 120 | IPI00298497 | 1 | 75.6 | 0.86 | 0.1 | 405 | ## | FGB Fibrinogen beta chain precursor | NYCGLPGEYWLGNDK                             | 2 | 1027.9768 | 4.569 | 0.524 |
| 120 | IPI00298497 | 1 | 75.6 | 0.86 | 0.1 | 405 | ## | FGB Fibrinogen beta chain precursor | QFGFNVATNTDGK                               | 2 | 794.9076  | 4.579 | 0.297 |
| 120 | IPI00298497 | 1 | 75.6 | 0.86 | 0.1 | 405 | ## | FGB Fibrinogen beta chain precursor | TM[147]TIHNGM[147]FFSTYDR                   | 2 | 996.9508  | 3.904 | 0.493 |
| 120 | IPI00298497 | 1 | 75.6 | 0.86 | 0.1 | 405 | ## | FGB Fibrinogen beta chain precursor | TPCTVSCNIPVVSGK                             | 2 | 938.9612  | 3.247 | 0.376 |
| 120 | IPI00298497 | 1 | 75.6 | 0.86 | 0.1 | 405 | ## | FGB Fibrinogen beta chain precursor | n[145]AHYGGFTVQNEANK[272]                   | 2 | 912.4676  | 5.948 | 0.531 |
| 120 | IPI00298497 | 1 | 75.6 | 0.86 | 0.1 | 405 | ## | FGB Fibrinogen beta chain precursor | n[145]DNENVVNEYSSELEK[272]                  | 2 | 1028.9993 | 6.476 | 0.551 |
| 120 | IPI00298497 | 1 | 75.6 | 0.86 | 0.1 | 405 | ## | FGB Fibrinogen beta chain precursor | n[145]EDGGGWYNR                             | 2 | 692.3136  | 3.715 | 0.441 |
| 120 | IPI00298497 | 1 | 75.6 | 0.86 | 0.1 | 405 | ## | FGB Fibrinogen beta chain precursor | n[145]EEAPSLRPAPPPISGGGYR                   | 2 | 1048.0563 | 4.113 | 0.483 |
| 120 | IPI00298497 | 1 | 75.6 | 0.86 | 0.1 | 405 | ## | FGB Fibrinogen beta chain precursor | n[145]GGETSEM[147]YLIQPDSSVK[272]PYR        | 2 | 1281.1435 | 4.694 | 0.544 |
| 120 | IPI00298497 | 1 | 75.6 | 0.86 | 0.1 | 405 | ## | FGB Fibrinogen beta chain precursor | n[145]HQLYIDETVNSNIPTNLR                    | 2 | 1136.0961 | 4.783 | 0.51  |
| 120 | IPI00298497 | 1 | 75.6 | 0.86 | 0.1 | 405 | ## | FGB Fibrinogen beta chain precursor | n[145]LESDDVSAQMEYCR                        | 2 | 860.8767  | 4.136 | 0.428 |
| 120 | IPI00298497 | 1 | 75.6 | 0.86 | 0.1 | 405 | ## | FGB Fibrinogen beta chain precursor | n[145]LESDDVSAQM[147]EYCR                   | 2 | 868.8741  | 3.452 | 0.502 |
| 120 | IPI00298497 | 1 | 75.6 | 0.86 | 0.1 | 405 | ## | FGB Fibrinogen beta chain precursor | n[145]MGPTELLIEMEDWK[272]                   | 2 | 990.5067  | 4.709 | 0.446 |
| 120 | IPI00298497 | 1 | 75.6 | 0.86 | 0.1 | 405 | ## | FGB Fibrinogen beta chain precursor | n[145]NYCGLPGEYWLGNDK[272]                  | 2 | 1031.9839 | 3.822 | 0.548 |
| 120 | IPI00298497 | 1 | 75.6 | 0.86 | 0.1 | 405 | ## | FGB Fibrinogen beta chain precursor | n[145]QFGFNVATNTDGK[272]                    | 2 | 798.9147  | 4.644 | 0.407 |
| 120 | IPI00298497 | 1 | 75.6 | 0.86 | 0.1 | 405 | ## | FGB Fibrinogen beta chain precursor | n[145]TMTIHNGM[147]FFSTYDR                  | 2 | 990.9569  | 2.932 | 0.404 |
| 120 | IPI00298497 | 1 | 75.6 | 0.86 | 0.1 | 405 | ## | FGB Fibrinogen beta chain precursor | n[145]TM[147]TIHNGMFFSTYDR                  | 2 | 990.9569  | 4.232 | 0.435 |
| 120 | IPI00298497 | 1 | 75.6 | 0.86 | 0.1 | 405 | ## | FGB Fibrinogen beta chain precursor | n[145]TPCTVSCNIPVVSGK[272]                  | 2 | 942.9683  | 3.44  | 0.475 |
| 120 | IPI00298497 | 1 | 75.6 | 0.86 | 0.1 | 405 | ## | FGB Fibrinogen beta chain precursor | n[145]TVSCNIPVVSGK[272]                     | 2 | 769.4197  | 3.835 | 0.477 |
| 120 | IPI00298497 | 1 | 75.6 | 0.86 | 0.1 | 405 | ## | FGB Fibrinogen beta chain precursor | n[145]VYCDM[147]JNTENGGWTVIQNR              | 2 | 1153.5097 | 4.447 | 0.413 |
| 120 | IPI00298497 | 1 | 75.6 | 0.86 | 0.1 | 405 | ## | FGB Fibrinogen beta chain precursor | AHYGGFTVQNEANK                              | 3 | 605.9761  | 4.011 | 0.21  |
| 120 | IPI00298497 | 1 | 75.6 | 0.86 | 0.1 | 405 | ## | FGB Fibrinogen beta chain precursor | AHYGGFTVQNEANKYQISVNK                       | 3 | 930.1559  | 5.793 | 0.567 |
| 120 | IPI00298497 | 1 | 75.6 | 0.86 | 0.1 | 405 | ## | FGB Fibrinogen beta chain precursor | DNENVVNEYSSELEK                             | 3 | 683.6639  | 3.186 | 0.313 |
| 120 | IPI00298497 | 1 | 75.6 | 0.86 | 0.1 | 405 | ## | FGB Fibrinogen beta chain precursor | EEAPSLRPAPPPISGGGYR                         | 3 | 697.7042  | 3.908 | 0.532 |
| 120 | IPI00298497 | 1 | 75.6 | 0.86 | 0.1 | 405 | ## | FGB Fibrinogen beta chain precursor | GGETSEMYLIQPDSSVKPYR                        | 3 | 846.4283  | 3.93  | 0.264 |
| 120 | IPI00298497 | 1 | 75.6 | 0.86 | 0.1 | 405 | ## | FGB Fibrinogen beta chain precursor | KGGETSEMYLIQPDSSVKPYR                       | 3 | 935.825   | 4.712 | 0.294 |
| 120 | IPI00298497 | 1 | 75.6 | 0.86 | 0.1 | 405 | ## | FGB Fibrinogen beta chain precursor | KGGETSEM[147]YLIQPDSSVKPYR                  | 3 | 941.1566  | 5.851 | 0.41  |
| 120 | IPI00298497 | 1 | 75.6 | 0.86 | 0.1 | 405 | ## | FGB Fibrinogen beta chain precursor | NSVDELNNNVEAVSQTSSSFQYMYLLK                 | 3 | 1149.8961 | 4.902 | 0.464 |
| 120 | IPI00298497 | 1 | 75.6 | 0.86 | 0.1 | 405 | ## | FGB Fibrinogen beta chain precursor | NSVDELNNNVEAVSQTSSSFQYM[147]YLLK            | 3 | 1155.2277 | 6.277 | 0.573 |
| 120 | IPI00298497 | 1 | 75.6 | 0.86 | 0.1 | 405 | ## | FGB Fibrinogen beta chain precursor | TMTIHNGMFFSTYDR                             | 3 | 654.3063  | 4.017 | 0.493 |
| 120 | IPI00298497 | 1 | 75.6 | 0.86 | 0.1 | 405 | ## | FGB Fibrinogen beta chain precursor | n[145]AHYGGFTVQNEANK[272]                   | 3 | 608.6475  | 2.103 | 0.164 |
| 120 | IPI00298497 | 1 | 75.6 | 0.86 | 0.1 | 405 | ## | FGB Fibrinogen beta chain precursor | n[145]EEAPSLRPAPPPISGGGYR                   | 3 | 699.0399  | 3.204 | 0.41  |
| 120 | IPI00298497 | 1 | 75.6 | 0.86 | 0.1 | 405 | ## | FGB Fibrinogen beta chain precursor | n[145]GGETSEMYLIQPDSSVK[272]PYR             | 3 | 849.0997  | 4.811 | 0.322 |
| 120 | IPI00298497 | 1 | 75.6 | 0.86 | 0.1 | 405 | ## | FGB Fibrinogen beta chain precursor | n[145]NSVDELNNNVEAVSQTSSSFQYM[147]YLLK[272] | 3 | 1157.8991 | 6.071 | 0.559 |
| 120 | IPI00298497 | 1 | 75.6 | 0.86 | 0.1 | 405 | ## | FGB Fibrinogen beta chain precursor | n[145]TMTIHNGMFFSTYDR                       | 3 | 655.642   | 4.147 | 0.506 |
| 120 | IPI00298497 | 1 | 75.6 | 0.86 | 0.1 | 405 | ## | FGB Fibrinogen beta chain precursor | n[145]TMTIHNGM[147]FFSTYDR                  | 3 | 660.9737  | 3.235 | 0.516 |
| 120 | IPI00298497 | 1 | 75.6 | 0.86 | 0.1 | 405 | ## | FGB Fibrinogen beta chain precursor | n[145]TM[147]TIHNGM[147]FFSTYDR             | 3 | 666.3053  | 2.767 | 0.168 |
| 120 | IPI00298497 | 1 | 75.6 | 0.86 | 0.1 | 405 | ## | FGB Fibrinogen beta chain precursor | KGGETSEMYLIQPDSSVKPYR                       | 4 | 702.1206  | 2.699 | 0.318 |
| 120 | IPI00298497 | 1 | 75.6 | 0.86 | 0.1 | 405 | ## | FGB Fibrinogen beta chain precursor | KGGETSEM[147]YLIQPDSSVKPYR                  | 4 | 706.1193  | 4.759 | 0.493 |
| 120 | IPI00298497 | 1 | 75.6 | 0.86 | 0.1 | 405 | ## | FGB Fibrinogen beta chain precursor | n[145]AHYGGFTVQNEANK[272]YQISVNK[272]       | 4 | 700.8741  | 5.246 | 0.495 |
| 120 | IPI00298497 | 1 | 75.6 | 0.86 | 0.1 | 405 | ## | FGB Fibrinogen beta chain precursor | GGETSEM[147]YLIQPDSSVKPYR                   | 3 | 851.76    | 2.392 | 0.21  |
| 120 | IPI00298497 | 1 | 75.6 | 0.86 | 0.1 | 405 | ## | FGB Fibrinogen beta chain precursor | TM[147]TIHNGM[147]FFSTYDR                   | 3 | 664.9696  | 2.881 | 0.337 |
| 120 | IPI00298497 | 1 | 75.6 | 0.86 | 0.1 | 405 | ## | FGB Fibrinogen beta chain precursor | TPCTVSCNIPVVSGK                             | 3 | 626.3099  | 2.45  | 0.27  |
| 120 | IPI00298497 | 1 | 75.6 | 0.86 | 0.1 | 405 | ## | FGB Fibrinogen beta chain precursor | n[145]HQLYIDETVNSNIPTNLR                    | 3 | 757.7332  | 3.191 | 0.287 |
| 120 | IPI00298497 | 1 | 75.6 | 0.86 | 0.1 | 405 | ## | FGB Fibrinogen beta chain precursor | n[145]MGPTELLIEMEDWK[272]                   | 3 | 660.6735  | 3.872 | 0.311 |
| 120 | IPI00298497 | 1 | 75.6 | 0.86 | 0.1 | 405 | ## | FGB Fibrinogen beta chain precursor | n[145]REEAPSLRPAPPPISGGGYR                  | 3 | 751.0736  | 3.536 | 0.399 |

|     |             |   |      |      |     |     |    |                                     |                                          |   |           |       |       |
|-----|-------------|---|------|------|-----|-----|----|-------------------------------------|------------------------------------------|---|-----------|-------|-------|
| 120 | IPI00298497 | 1 | 75.6 | 0.86 | 0.1 | 405 | ## | FGB Fibrinogen beta chain precursor | n[145]TM[147]TIHNGMFFSTYDR               | 3 | 660.9737  | 2.777 | 0.337 |
| 120 | IPI00298497 | 1 | 75.6 | 0.86 | 0.1 | 405 | ## | FGB Fibrinogen beta chain precursor | n[145]TPCTVSCNIPVVSQK[272]ECEEIIR        | 3 | 935.1126  | 3.785 | 0.345 |
| 120 | IPI00298497 | 1 | 75.6 | 0.86 | 0.1 | 405 | ## | FGB Fibrinogen beta chain precursor | AHYGGFTVQNEANKYQISVNK                    | 4 | 697.8687  | 4.233 | 0.382 |
| 120 | IPI00298497 | 1 | 75.6 | 0.86 | 0.1 | 405 | ## | FGB Fibrinogen beta chain precursor | n[145]REEAPSLRPAPPPISGGGYR               | 4 | 563.5571  | 3.131 | 0.334 |
| 120 | IPI00298497 | 1 | 75.6 | 0.86 | 0.1 | 405 | ## | FGB Fibrinogen beta chain precursor | n[145]TM[147]TIHNGM[147]FFSTYDR          | 2 | 998.9543  | 3.549 | 0.297 |
| 120 | IPI00298497 | 1 | 75.6 | 0.86 | 0.1 | 405 | ## | FGB Fibrinogen beta chain precursor | KAPDAGGCLH                               | 3 | 432.218   | 2.985 | 0.431 |
| 120 | IPI00298497 | 1 | 75.6 | 0.86 | 0.1 | 405 | ## | FGB Fibrinogen beta chain precursor | n[145]IQK[272]LESVSAQM[147]EYCR          | 3 | 750.6984  | 3.85  | 0.41  |
| 120 | IPI00298497 | 1 | 75.6 | 0.86 | 0.1 | 405 | ## | FGB Fibrinogen beta chain precursor | n[145]YQISVNK[272]YR                     | 3 | 486.9484  | 3.161 | 0.284 |
| 120 | IPI00298497 | 1 | 75.6 | 0.86 | 0.1 | 405 | ## | FGB Fibrinogen beta chain precursor | n[145]APDAGGCLHADPDLGLVLCPTGCQLQEALLQQEF | 4 | 1017.486  | 3.65  | 0.4   |
| 120 | IPI00298497 | 1 | 75.6 | 0.86 | 0.1 | 405 | ## | FGB Fibrinogen beta chain precursor | n[145]QDGSVDFGR                          | 2 | 562.7763  | 2.016 | 0.224 |
| 120 | IPI00298497 | 1 | 75.6 | 0.86 | 0.1 | 405 | ## | FGB Fibrinogen beta chain precursor | n[145]NSVDELNNVEAVSQTSSSSSQYMYLLK[272]   | 3 | 1152.5675 | 3.826 | 0.26  |
| 120 | IPI00298497 | 1 | 75.6 | 0.86 | 0.1 | 405 | ## | FGB Fibrinogen beta chain precursor | IRPFFPQQ                                 | 2 | 586.8324  | 2.279 | 0.288 |
| 120 | IPI00298497 | 1 | 75.6 | 0.86 | 0.1 | 405 | ## | FGB Fibrinogen beta chain precursor | YQISVNK                                  | 1 | 1131.6522 | 2.524 | 0.209 |
| 120 | IPI00298497 | 1 | 75.6 | 0.86 | 0.1 | 405 | ## | FGB Fibrinogen beta chain precursor | ECEEIIR                                  | 1 | 1077.5068 | 2.295 | 0.165 |
| 120 | IPI00298497 | 1 | 75.6 | 0.86 | 0.1 | 405 | ## | FGB Fibrinogen beta chain precursor | n[145]ECEEIIR                            | 2 | 541.2606  | 2.866 | 0.254 |
| 120 | IPI00298497 | 1 | 75.6 | 0.86 | 0.1 | 405 | ## | FGB Fibrinogen beta chain precursor | n[145]GHRPLDK[272]K[272]                 | 4 | 346.4703  | 1.983 | 0.16  |
| 120 | IPI00298497 | 1 | 75.6 | 0.86 | 0.1 | 405 | ## | FGB Fibrinogen beta chain precursor | YQISVNK                                  | 2 | 566.3297  | 2.679 | 0.178 |
| 120 | IPI00298497 | 1 | 75.6 | 0.86 | 0.1 | 405 | ## | FGB Fibrinogen beta chain precursor | n[145]CHAANPNGR                          | 2 | 565.2592  | 2.269 | 0.321 |
| 120 | IPI00298497 | 1 | 75.6 | 0.86 | 0.1 | 405 | ## | FGB Fibrinogen beta chain precursor | n[145]IRPFFPQQ                           | 2 | 588.836   | 2.031 | 0.171 |
| 120 | IPI00298497 | 1 | 75.6 | 0.86 | 0.1 | 405 | ## | FGB Fibrinogen beta chain precursor | SILENLR                                  | 1 | 984.5837  | 2.478 | 0.031 |
| 120 | IPI00298497 | 1 | 75.6 | 0.86 | 0.1 | 405 | ## | FGB Fibrinogen beta chain precursor | n[145]AHYGGFTVQNEANK[272]YQISVNK[272]YR  | 5 | 624.7336  | 2.787 | 0.136 |
| 120 | IPI00298497 | 1 | 75.6 | 0.86 | 0.1 | 405 | ## | FGB Fibrinogen beta chain precursor | SILENLR                                  | 2 | 492.7955  | 2.612 | 0.169 |
| 120 | IPI00298497 | 1 | 75.6 | 0.86 | 0.1 | 405 | ## | FGB Fibrinogen beta chain precursor | n[145]ECEEIIR                            | 1 | 1081.5139 | 2.224 | 0.099 |
| 120 | IPI00298497 | 1 | 75.6 | 0.86 | 0.1 | 405 | ## | FGB Fibrinogen beta chain precursor | n[145]YQISVNK[272]                       | 2 | 570.3368  | 2.442 | 0.225 |
| 120 | IPI00298497 | 1 | 75.6 | 0.86 | 0.1 | 405 | ## | FGB Fibrinogen beta chain precursor | n[145]SILENLR                            | 1 | 988.5908  | 2.465 | 0.025 |
| 120 | IPI00298497 | 1 | 75.6 | 0.86 | 0.1 | 405 | ## | FGB Fibrinogen beta chain precursor | n[145]SILENLR                            | 2 | 494.799   | 2.897 | 0.075 |
| 120 | IPI00298497 | 1 | 75.6 | 0.86 | 0.1 | 405 | ## | FGB Fibrinogen beta chain precursor | n[145]YQISVNK[272]                       | 1 | 1139.6664 | 2.443 | 0.211 |
| 120 | IPI00298497 | 1 | 75.6 | 0.86 | 0.1 | 405 | ## | FGB Fibrinogen beta chain precursor | GHRPLDKK                                 | 3 | 457.6175  | 2.128 | 0.194 |
| 120 | IPI00298497 | 1 | 75.6 | 0.86 | 0.1 | 405 | ## | FGB Fibrinogen beta chain precursor | n[145]GHRPLDK[272]K[272]                 | 3 | 461.6246  | 1.833 | 0.092 |
| 120 | IPI00298497 | 1 | 75.6 | 0.86 | 0.1 | 405 | ## | FGB Fibrinogen beta chain precursor | QDGSVDFGR                                | 2 | 560.7727  | 2.235 | 0.249 |
| 120 | IPI00298497 | 1 | 75.6 | 0.86 | 0.1 | 405 | ## | FGB Fibrinogen beta chain precursor | GHRPLDKK                                 | 2 | 685.9226  | 2.285 | 0.076 |
| 120 | IPI00298497 | 1 | 75.6 | 0.86 | 0.1 | 405 | ## | FGB Fibrinogen beta chain precursor | REEAPSLR                                 | 3 | 366.5402  | 2.997 | 0.151 |
| 120 | IPI00298497 | 1 | 75.6 | 0.86 | 0.1 | 405 | ## | FGB Fibrinogen beta chain precursor | YQISVNKYR                                | 3 | 484.277   | 3.472 | 0.182 |
| 120 | IPI00298497 | 1 | 75.6 | 0.86 | 0.1 | 405 | ## | FGB Fibrinogen beta chain precursor | n[145]GHRPLDK[272]K[272]                 | 2 | 691.9333  | 2.139 | 0.131 |
| 120 | IPI00298497 | 1 | 75.6 | 0.86 | 0.1 | 405 | ## | FGB Fibrinogen beta chain precursor | n[145]QLQEALLQQRPIR                      | 3 | 622.6941  | 3.459 | 0.295 |
| 120 | IPI00298497 | 1 | 75.6 | 0.86 | 0.1 | 405 | ## | FGB Fibrinogen beta chain precursor | n[145]TPCTVSCNIPVVSQK[272]               | 3 | 628.9813  | 2.557 | 0.07  |
| 120 | IPI00298497 | 1 | 75.6 | 0.86 | 0.1 | 405 | ## | FGB Fibrinogen beta chain precursor | GHRPLDKK                                 | 4 | 343.465   | 1.415 | 0.083 |
| 120 | IPI00298497 | 1 | 75.6 | 0.86 | 0.1 | 405 | ## | FGB Fibrinogen beta chain precursor | LESVSAQM[147]EYCR                        | 3 | 578.2495  | 2.518 | 0.155 |
| 120 | IPI00298497 | 1 | 75.6 | 0.86 | 0.1 | 405 | ## | FGB Fibrinogen beta chain precursor | n[145]REEAPSLRPAPPPISGGGYR               | 2 | 1126.1068 | 2.423 | 0.088 |
| 120 | IPI00298497 | 1 | 75.6 | 0.86 | 0.1 | 405 | ## | FGB Fibrinogen beta chain precursor | n[145]YQISVNK[272]YR                     | 2 | 729.919   | 2.648 | 0.253 |
| 120 | IPI00298497 | 1 | 75.6 | 0.86 | 0.1 | 405 | ## | FGB Fibrinogen beta chain precursor | TPCTVSCNIPVVSQKECEEIIR                   | 3 | 932.4412  | 2.948 | 0.227 |
| 120 | IPI00298497 | 1 | 75.6 | 0.86 | 0.1 | 405 | ## | FGB Fibrinogen beta chain precursor | n[145]JSQLTR                             | 2 | 431.2674  | 2.296 | 0.101 |
| 120 | IPI00298497 | 1 | 75.6 | 0.86 | 0.1 | 405 | ## | FGB Fibrinogen beta chain precursor | KGGTSEM[147]YLIQPDSSVK                   | 3 | 802.4176  | 4.117 | 0.253 |
| 120 | IPI00298497 | 1 | 75.6 | 0.86 | 0.1 | 405 | ## | FGB Fibrinogen beta chain precursor | YQISVNKYR                                | 2 | 725.9119  | 3.114 | 0.156 |
| 120 | IPI00298497 | 1 | 75.6 | 0.86 | 0.1 | 405 | ## | FGB Fibrinogen beta chain precursor | n[145]PAPPPISGGGYR                       | 2 | 656.8602  | 1.971 | 0.067 |
| 120 | IPI00298497 | 1 | 75.6 | 0.86 | 0.1 | 405 | ## | FGB Fibrinogen beta chain precursor | CTVSCNIPVVSQK                            | 3 | 560.2764  | 3.249 | 0.267 |
| 120 | IPI00298497 | 1 | 75.6 | 0.86 | 0.1 | 405 | ## | FGB Fibrinogen beta chain precursor | TMTIHNGM[147]FFSTYDR                     | 2 | 988.9533  | 4.224 | 0.548 |
| 120 | IPI00298497 | 1 | 75.6 | 0.86 | 0.1 | 405 | ## | FGB Fibrinogen beta chain precursor | KAPDAGGCLHAD                             | 3 | 494.2394  | 2.522 | 0.301 |

|     |             |   |      |      |     |     |    |                                     |                                          |   |           |       |       |
|-----|-------------|---|------|------|-----|-----|----|-------------------------------------|------------------------------------------|---|-----------|-------|-------|
| 120 | IPI00298497 | 1 | 75.6 | 0.86 | 0.1 | 405 | ## | FGB Fibrinogen beta chain precursor | n[145]EEAPSLRPAPPPISG                    | 2 | 831.4526  | 2.962 | 0.257 |
| 120 | IPI00298497 | 1 | 75.6 | 0.86 | 0.1 | 405 | ## | FGB Fibrinogen beta chain precursor | n[145]DIWQK[272]                         | 2 | 489.2866  | 1.968 | 0.004 |
| 120 | IPI00298497 | 1 | 75.6 | 0.86 | 0.1 | 405 | ## | FGB Fibrinogen beta chain precursor | n[145]GFGNVATNTDGK[272]                  | 2 | 734.8854  | 3.935 | 0.325 |
| 120 | IPI00298497 | 1 | 75.6 | 0.86 | 0.1 | 405 | ## | FGB Fibrinogen beta chain precursor | n[145]CTVSCNIPVVSGK[272]                 | 2 | 843.9181  | 3.066 | 0.424 |
| 120 | IPI00298497 | 1 | 75.6 | 0.86 | 0.1 | 405 | ## | FGB Fibrinogen beta chain precursor | n[145]VNDNEEGFFSAR                       | 2 | 764.8611  | 3.719 | 0.396 |
| 120 | IPI00298497 | 1 | 75.6 | 0.86 | 0.1 | 405 | ## | FGB Fibrinogen beta chain precursor | n[145]EEAPSLRPAPPPISGG                   | 2 | 859.9633  | 3.223 | 0.389 |
| 120 | IPI00298497 | 1 | 75.6 | 0.86 | 0.1 | 405 | ## | FGB Fibrinogen beta chain precursor | GFGNVATNTDGK                             | 2 | 730.8783  | 3.578 | 0.243 |
| 120 | IPI00298497 | 1 | 75.6 | 0.86 | 0.1 | 405 | ## | FGB Fibrinogen beta chain precursor | n[145]MGPTELLIEM[147]EDWK[272]           | 3 | 666.0052  | 2.989 | 0.109 |
| 120 | IPI00298497 | 1 | 75.6 | 0.86 | 0.1 | 405 | ## | FGB Fibrinogen beta chain precursor | n[145]DNEEGFFSAR                         | 2 | 658.3054  | 3.405 | 0.353 |
| 120 | IPI00298497 | 1 | 75.6 | 0.86 | 0.1 | 405 | ## | FGB Fibrinogen beta chain precursor | KAPDAGGCLHAD                             | 2 | 740.8554  | 2.173 | 0.345 |
| 120 | IPI00298497 | 1 | 75.6 | 0.86 | 0.1 | 405 | ## | FGB Fibrinogen beta chain precursor | EEAPSLRPAPPPISGG                         | 2 | 857.9598  | 3.708 | 0.32  |
| 120 | IPI00298497 | 1 | 75.6 | 0.86 | 0.1 | 405 | ## | FGB Fibrinogen beta chain precursor | n[145]AHYGGFTVQNEANK[272]YQISV NK[272]YR | 3 | 1040.5511 | 2.685 | 0.357 |
| 120 | IPI00298497 | 1 | 75.6 | 0.86 | 0.1 | 405 | ## | FGB Fibrinogen beta chain precursor | n[145]REEAPSLR                           | 3 | 367.8759  | 2.677 | 0.109 |
| 120 | IPI00298497 | 1 | 75.6 | 0.86 | 0.1 | 405 | ## | FGB Fibrinogen beta chain precursor | n[145]GFTVQNEANK[272]                    | 2 | 698.3772  | 3.395 | 0.261 |
| 120 | IPI00298497 | 1 | 75.6 | 0.86 | 0.1 | 405 | ## | FGB Fibrinogen beta chain precursor | n[145]AHYGGFTVQNEA                       | 2 | 719.3476  | 2.987 | 0.324 |
| 120 | IPI00298497 | 1 | 75.6 | 0.86 | 0.1 | 405 | ## | FGB Fibrinogen beta chain precursor | n[145]EEAPSLRPAPPPISGGG                  | 2 | 888.4741  | 3.195 | 0.358 |
| 120 | IPI00298497 | 1 | 75.6 | 0.86 | 0.1 | 405 | ## | FGB Fibrinogen beta chain precursor | EEAPSLRPAPPPISG                          | 2 | 829.4491  | 2.649 | 0.395 |
| 120 | IPI00298497 | 1 | 75.6 | 0.86 | 0.1 | 405 | ## | FGB Fibrinogen beta chain precursor | DLWQK                                    | 2 | 485.2795  | 1.732 | 0.049 |
| 120 | IPI00298497 | 1 | 75.6 | 0.86 | 0.1 | 405 | ## | FGB Fibrinogen beta chain precursor | HGTDDGVVWM[147]NWK[272]                  | 3 | 615.6339  | 3.138 | 0.146 |
| 120 | IPI00298497 | 1 | 75.6 | 0.86 | 0.1 | 405 | ## | FGB Fibrinogen beta chain precursor | n[145]GVNDNEEGFFSAR                      | 2 | 793.3718  | 3.555 | 0.311 |
| 120 | IPI00298497 | 1 | 75.6 | 0.86 | 0.1 | 405 | ## | FGB Fibrinogen beta chain precursor | n[145]MGPTELLIEM[147]EDWK[272]           | 2 | 998.5041  | 3.143 | 0.236 |
| 120 | IPI00298497 | 1 | 75.6 | 0.86 | 0.1 | 405 | ## | FGB Fibrinogen beta chain precursor | EYSSELEK                                 | 2 | 632.8247  | 2.709 | 0.279 |
| 120 | IPI00298497 | 1 | 75.6 | 0.86 | 0.1 | 405 | ## | FGB Fibrinogen beta chain precursor | PAPPPISGGGYR                             | 2 | 654.8566  | 2.29  | 0.359 |
| 120 | IPI00298497 | 1 | 75.6 | 0.86 | 0.1 | 405 | ## | FGB Fibrinogen beta chain precursor | M[147]GPTELLIEM[147]EDWK[272]            | 2 | 1004.4981 | 3.256 | 0.208 |
| 120 | IPI00298497 | 1 | 75.6 | 0.86 | 0.1 | 405 | ## | FGB Fibrinogen beta chain precursor | n[145]NYCGLPGEYWLGN DK[272]              | 3 | 688.325   | 2.39  | 0.004 |
| 120 | IPI00298497 | 1 | 75.6 | 0.86 | 0.1 | 405 | ## | FGB Fibrinogen beta chain precursor | QVKDNENVVNEYSSELEK                       | 3 | 848.7696  | 3.102 | 0.188 |
| 120 | IPI00298497 | 1 | 75.6 | 0.86 | 0.1 | 405 | ## | FGB Fibrinogen beta chain precursor | AHYGGFTVQNE                              | 2 | 681.8255  | 2.512 | 0.263 |
| 120 | IPI00298497 | 1 | 75.6 | 0.86 | 0.1 | 405 | ## | FGB Fibrinogen beta chain precursor | REEAPSLR                                 | 2 | 549.3067  | 2.701 | 0.128 |
| 120 | IPI00298497 | 1 | 75.6 | 0.86 | 0.1 | 405 | ## | FGB Fibrinogen beta chain precursor | AHYGGFTVQNEA                             | 2 | 717.3441  | 2.372 | 0.286 |
| 120 | IPI00298497 | 1 | 75.6 | 0.86 | 0.1 | 405 | ## | FGB Fibrinogen beta chain precursor | AHYGGFTVQNEANKYQISV NKYR                 | 5 | 622.3293  | 2.695 | 0.053 |
| 120 | IPI00298497 | 1 | 75.6 | 0.86 | 0.1 | 405 | ## | FGB Fibrinogen beta chain precursor | n[145]EAPSLRPAPPPISGGGYR                 | 3 | 656.0257  | 2.729 | 0.254 |
| 120 | IPI00298497 | 1 | 75.6 | 0.86 | 0.1 | 405 | ## | FGB Fibrinogen beta chain precursor | n[145]TM[147]TIHNGM[147]FFSTY            | 2 | 863.3903  | 2.46  | 0.202 |
| 120 | IPI00298497 | 1 | 75.6 | 0.86 | 0.1 | 405 | ## | FGB Fibrinogen beta chain precursor | n[145]TM[147]TIHNGM[147]F                | 2 | 614.2846  | 1.955 | 0.296 |
| 120 | IPI00298497 | 1 | 75.6 | 0.86 | 0.1 | 405 | ## | FGB Fibrinogen beta chain precursor | n[145]REEAPSLR                           | 2 | 551.3103  | 2.998 | 0.079 |
| 120 | IPI00298497 | 1 | 75.6 | 0.86 | 0.1 | 405 | ## | FGB Fibrinogen beta chain precursor | AHYGGF                                   | 2 | 396.1954  | 1.875 | 0.222 |
| 120 | IPI00298497 | 1 | 75.6 | 0.86 | 0.1 | 405 | ## | FGB Fibrinogen beta chain precursor | ECEEIRK                                  | 3 | 449.2371  | 1.588 | 0.046 |
| 120 | IPI00298497 | 1 | 75.6 | 0.86 | 0.1 | 405 | ## | FGB Fibrinogen beta chain precursor | NYCGLPGEYWLGN DK[272]                    | 2 | 1029.9804 | 2.315 | 0.273 |
| 120 | IPI00298497 | 1 | 75.6 | 0.86 | 0.1 | 405 | ## | FGB Fibrinogen beta chain precursor | n[145]TMTIHNGM[147]F                     | 2 | 606.2871  | 2.709 | 0.112 |
| 120 | IPI00298497 | 1 | 75.6 | 0.86 | 0.1 | 405 | ## | FGB Fibrinogen beta chain precursor | KAPDAGGCLH                               | 2 | 647.8234  | 2.118 | 0.241 |
| 120 | IPI00298497 | 1 | 75.6 | 0.86 | 0.1 | 405 | ## | FGB Fibrinogen beta chain precursor | n[145]AHYGGFTVQNEAN                      | 2 | 776.3691  | 2.353 | 0.158 |
| 120 | IPI00298497 | 1 | 75.6 | 0.86 | 0.1 | 405 | ## | FGB Fibrinogen beta chain precursor | TVQNEANK                                 | 2 | 592.3252  | 2.364 | 0.217 |
| 120 | IPI00298497 | 1 | 75.6 | 0.86 | 0.1 | 405 | ## | FGB Fibrinogen beta chain precursor | GSVDFGR                                  | 2 | 439.23    | 2.195 | 0.093 |
| 120 | IPI00298497 | 1 | 75.6 | 0.86 | 0.1 | 405 | ## | FGB Fibrinogen beta chain precursor | TM[147]TIHNGM[147]FF                     | 2 | 685.8152  | 1.844 | 0.262 |
| 120 | IPI00298497 | 1 | 75.6 | 0.86 | 0.1 | 405 | ## | FGB Fibrinogen beta chain precursor | n[145]GSVDFGR                            | 2 | 441.2335  | 2.374 | 0.11  |
| 120 | IPI00298497 | 1 | 75.6 | 0.86 | 0.1 | 405 | ## | FGB Fibrinogen beta chain precursor | TM[147]TIHNGM[147]FFSTY                  | 2 | 861.3868  | 2.168 | 0.267 |
| 120 | IPI00298497 | 1 | 75.6 | 0.86 | 0.1 | 405 | ## | FGB Fibrinogen beta chain precursor | CTVSCNIPVVSGK                            | 2 | 839.911   | 3.3   | 0.4   |
| 120 | IPI00298497 | 1 | 75.6 | 0.86 | 0.1 | 405 | ## | FGB Fibrinogen beta chain precursor | n[145]TM[147]TIHNGMFF                    | 2 | 679.8213  | 1.877 | 0.252 |
| 120 | IPI00298497 | 1 | 75.6 | 0.86 | 0.1 | 405 | ## | FGB Fibrinogen beta chain precursor | TM[147]TIHNGM[147]F                      | 2 | 612.281   | 1.818 | 0.219 |

|     |             |   |      |      |      |     |    |                                      |                                     |   |           |       |       |
|-----|-------------|---|------|------|------|-----|----|--------------------------------------|-------------------------------------|---|-----------|-------|-------|
| 120 | IPI00298497 | 1 | 75.6 | 0.86 | 0.1  | 405 | ## | FGB Fibrinogen beta chain precursor  | n[145]APPPISGGGYR                   | 2 | 608.3338  | 1.785 | 0.211 |
| 120 | IPI00298497 | 1 | 75.6 | 0.86 | 0.1  | 405 | ## | FGB Fibrinogen beta chain precursor  | n[145]HGTDDGVVWM[147]NWK[272]       | 3 | 616.9696  | 2.455 | 0.13  |
| 120 | IPI00298497 | 1 | 75.6 | 0.86 | 0.1  | 405 | ## | FGB Fibrinogen beta chain precursor  | n[145]EEAPSLR                       | 1 | 945.5122  | 2.196 | 0.147 |
| 120 | IPI00298497 | 1 | 75.6 | 0.86 | 0.1  | 405 | ## | FGB Fibrinogen beta chain precursor  | n[145]EEAPSLR                       | 2 | 473.2597  | 2.327 | 0.046 |
| 120 | IPI00298497 | 1 | 75.6 | 0.86 | 0.1  | 405 | ## | FGB Fibrinogen beta chain precursor  | EEAPSLR                             | 1 | 941.5051  | 2.293 | 0.057 |
| 120 | IPI00298497 | 1 | 75.6 | 0.86 | 0.1  | 405 | ## | FGB Fibrinogen beta chain precursor  | n[145]PPPIISGGGYR                   | 2 | 572.8152  | 2.236 | 0.082 |
| 120 | IPI00298497 | 1 | 75.6 | 0.86 | 0.1  | 405 | ## | FGB Fibrinogen beta chain precursor  | M[147]GPTELLIEM[147]EDWK[272]GDKVK  | 3 | 939.1667  | 2.421 | 0.179 |
| 120 | IPI00298497 | 1 | 75.6 | 0.86 | 0.1  | 405 | ## | FGB Fibrinogen beta chain precursor  | n[145]AHYGGFTVQNE                   | 2 | 683.8291  | 2.699 | 0.141 |
| 120 | IPI00298497 | 1 | 75.6 | 0.86 | 0.1  | 405 | ## | FGB Fibrinogen beta chain precursor  | n[145]MYLLK[272]                    | 2 | 478.2981  | 2.045 | 0.167 |
| 120 | IPI00298497 | 1 | 75.6 | 0.86 | 0.1  | 405 | ## | FGB Fibrinogen beta chain precursor  | n[145]TM[147]TIHNGM[147]FF          | 2 | 687.8188  | 2.026 | 0.078 |
| 120 | IPI00298497 | 1 | 75.6 | 0.86 | 0.1  | 405 | ## | FGB Fibrinogen beta chain precursor  | FSTYDR                              | 2 | 464.7298  | 1.869 | 0.113 |
| 120 | IPI00298497 | 1 | 75.6 | 0.86 | 0.1  | 405 | ## | FGB Fibrinogen beta chain precursor  | REEAPSLRPAPPISGG                    | 3 | 624.3426  | 2.12  | 0.172 |
| 120 | IPI00298497 | 1 | 75.6 | 0.86 | 0.1  | 405 | ## | FGB Fibrinogen beta chain precursor  | n[145]IRPFFPQ                       | 2 | 524.8067  | 1.621 | 0.08  |
| 120 | IPI00298497 | 1 | 75.6 | 0.86 | 0.1  | 405 | ## | FGB Fibrinogen beta chain precursor  | n[145]SNIPTNLR                      | 2 | 529.8074  | 2.172 | 0.076 |
| 120 | IPI00298497 | 1 | 75.6 | 0.86 | 0.1  | 405 | ## | FGB Fibrinogen beta chain precursor  | n[145]AHYGGF                        | 2 | 398.199   | 1.45  | 0.107 |
| 120 | IPI00298497 | 1 | 75.6 | 0.86 | 0.1  | 405 | ## | FGB Fibrinogen beta chain precursor  | n[145]LESVSAQM[147]EYCR             | 3 | 579.5852  | 2.112 | 0.002 |
| 120 | IPI00298497 | 1 | 75.6 | 0.86 | 0.1  | 405 | ## | FGB Fibrinogen beta chain precursor  | n[145]HYGGFTVQNEANK[272]            | 3 | 584.9684  | 2.514 | 0.016 |
| 120 | IPI00298497 | 1 | 75.6 | 0.86 | 0.1  | 405 | ## | FGB Fibrinogen beta chain precursor  | EEAPSLR                             | 2 | 471.2562  | 1.69  | 0.03  |
| 120 | IPI00298497 | 1 | 75.6 | 0.86 | 0.1  | 405 | ## | FGB Fibrinogen beta chain precursor  | SVK[272]                            | 1 | 617.4104  | 0.88  | 0.378 |
| 121 | IPI00298828 | 1 | 55.4 | 0.83 | 0.07 | 120 | 56 | APOH Beta-2-glycoprotein 1 precursor | CSYTEDAQCIDGTIEVPK                  | 2 | 1172.52   | 3.998 | 0.537 |
| 121 | IPI00298828 | 1 | 55.4 | 0.83 | 0.07 | 120 | 56 | APOH Beta-2-glycoprotein 1 precursor | TCPKPDLLPFSTVVPLK                   | 2 | 1162.1313 | 4.358 | 0.462 |
| 121 | IPI00298828 | 1 | 55.4 | 0.83 | 0.07 | 120 | 56 | APOH Beta-2-glycoprotein 1 precursor | TFYEPGEEITYSCK                      | 2 | 996.9577  | 4.894 | 0.566 |
| 121 | IPI00298828 | 1 | 55.4 | 0.83 | 0.07 | 120 | 56 | APOH Beta-2-glycoprotein 1 precursor | TFYEPGEEITYSCKPGYVSR                | 2 | 1326.6273 | 5.194 | 0.572 |
| 121 | IPI00298828 | 1 | 55.4 | 0.83 | 0.07 | 120 | 56 | APOH Beta-2-glycoprotein 1 precursor | n[145]CSYTEDAQCIDGTIEVPK[272]       | 2 | 1176.5271 | 4.191 | 0.604 |
| 121 | IPI00298828 | 1 | 55.4 | 0.83 | 0.07 | 120 | 56 | APOH Beta-2-glycoprotein 1 precursor | n[145]TCPK[272]PDDLFPSTVVPLK[272]   | 2 | 1168.142  | 3.468 | 0.325 |
| 121 | IPI00298828 | 1 | 55.4 | 0.83 | 0.07 | 120 | 56 | APOH Beta-2-glycoprotein 1 precursor | n[145]TFYEPGEEITYSCK[272]           | 2 | 1000.9648 | 4.538 | 0.507 |
| 121 | IPI00298828 | 1 | 55.4 | 0.83 | 0.07 | 120 | 56 | APOH Beta-2-glycoprotein 1 precursor | n[145]TFYEPGEEITYSCK[272]PGYVSR     | 2 | 1330.6344 | 4.588 | 0.585 |
| 121 | IPI00298828 | 1 | 55.4 | 0.83 | 0.07 | 120 | 56 | APOH Beta-2-glycoprotein 1 precursor | n[145]VCPFAGILENGAVR                | 2 | 818.427   | 4.395 | 0.395 |
| 121 | IPI00298828 | 1 | 55.4 | 0.83 | 0.07 | 120 | 56 | APOH Beta-2-glycoprotein 1 precursor | ATFGCHDGYSLDGPREEIECTK              | 3 | 882.0444  | 6.589 | 0.665 |
| 121 | IPI00298828 | 1 | 55.4 | 0.83 | 0.07 | 120 | 56 | APOH Beta-2-glycoprotein 1 precursor | TCPKPDLLPFSTVVPLK                   | 3 | 775.09    | 4.772 | 0.445 |
| 121 | IPI00298828 | 1 | 55.4 | 0.83 | 0.07 | 120 | 56 | APOH Beta-2-glycoprotein 1 precursor | TFYEPGEEITYSCKPGYVSR                | 3 | 884.754   | 5.064 | 0.537 |
| 121 | IPI00298828 | 1 | 55.4 | 0.83 | 0.07 | 120 | 56 | APOH Beta-2-glycoprotein 1 precursor | n[145]ATFGCHDGYSLDGPREEIECTK[272]   | 3 | 884.7158  | 2.124 | 0.013 |
| 121 | IPI00298828 | 1 | 55.4 | 0.83 | 0.07 | 120 | 56 | APOH Beta-2-glycoprotein 1 precursor | n[145]GCHDGYSLDGPREEIECTK[272]      | 3 | 778.3314  | 5.223 | 0.463 |
| 121 | IPI00298828 | 1 | 55.4 | 0.83 | 0.07 | 120 | 56 | APOH Beta-2-glycoprotein 1 precursor | n[145]TCPK[272]PDDLFPSTVVPLK[272]   | 3 | 779.0971  | 4.157 | 0.478 |
| 121 | IPI00298828 | 1 | 55.4 | 0.83 | 0.07 | 120 | 56 | APOH Beta-2-glycoprotein 1 precursor | n[145]TFYEPGEEITYSCK[272]PGYVSR     | 3 | 887.4254  | 5.393 | 0.524 |
| 121 | IPI00298828 | 1 | 55.4 | 0.83 | 0.07 | 120 | 56 | APOH Beta-2-glycoprotein 1 precursor | n[145]NGM[147]LHGDK[272]VSFFCK[272] | 4 | 520.0153  | 2.528 | 0.447 |
| 121 | IPI00298828 | 1 | 55.4 | 0.83 | 0.07 | 120 | 56 | APOH Beta-2-glycoprotein 1 precursor | KATVVYQGER                          | 3 | 477.6087  | 2.509 | 0.244 |
| 121 | IPI00298828 | 1 | 55.4 | 0.83 | 0.07 | 120 | 56 | APOH Beta-2-glycoprotein 1 precursor | n[145]EHSSLAFWK[272]                | 3 | 464.922   | 3.392 | 0.223 |
| 121 | IPI00298828 | 1 | 55.4 | 0.83 | 0.07 | 120 | 56 | APOH Beta-2-glycoprotein 1 precursor | ATVVYQGER                           | 2 | 581.8144  | 2.433 | 0.23  |
| 121 | IPI00298828 | 1 | 55.4 | 0.83 | 0.07 | 120 | 56 | APOH Beta-2-glycoprotein 1 precursor | KATVVYQGER                          | 2 | 715.9094  | 3.265 | 0.311 |
| 121 | IPI00298828 | 1 | 55.4 | 0.83 | 0.07 | 120 | 56 | APOH Beta-2-glycoprotein 1 precursor | VCPFAGILENGAVR                      | 2 | 816.4235  | 3.553 | 0.41  |
| 121 | IPI00298828 | 1 | 55.4 | 0.83 | 0.07 | 120 | 56 | APOH Beta-2-glycoprotein 1 precursor | VSFFCK                              | 2 | 528.7721  | 2.588 | 0.327 |
| 121 | IPI00298828 | 1 | 55.4 | 0.83 | 0.07 | 120 | 56 | APOH Beta-2-glycoprotein 1 precursor | n[145]ATVVYQGER                     | 2 | 583.818   | 2.676 | 0.174 |
| 121 | IPI00298828 | 1 | 55.4 | 0.83 | 0.07 | 120 | 56 | APOH Beta-2-glycoprotein 1 precursor | EHSSLAFWK                           | 3 | 462.2506  | 2.983 | 0.216 |
| 121 | IPI00298828 | 1 | 55.4 | 0.83 | 0.07 | 120 | 56 | APOH Beta-2-glycoprotein 1 precursor | n[145]FK[272]NGM[147]LHGDK[272]     | 3 | 532.2961  | 2.406 | 0.356 |
| 121 | IPI00298828 | 1 | 55.4 | 0.83 | 0.07 | 120 | 56 | APOH Beta-2-glycoprotein 1 precursor | EHSSLAFWK                           | 2 | 692.8723  | 3.269 | 0.374 |
| 121 | IPI00298828 | 1 | 55.4 | 0.83 | 0.07 | 120 | 56 | APOH Beta-2-glycoprotein 1 precursor | TDASDVKPC                           | 2 | 631.2994  | 2.035 | 0.181 |
| 121 | IPI00298828 | 1 | 55.4 | 0.83 | 0.07 | 120 | 56 | APOH Beta-2-glycoprotein 1 precursor | n[145]EHSSLAFWK[272]                | 2 | 696.8794  | 3.281 | 0.352 |

|     |             |   |      |      |      |     |    |                                      |                                  |   |          |       |       |
|-----|-------------|---|------|------|------|-----|----|--------------------------------------|----------------------------------|---|----------|-------|-------|
| 121 | IPI00298828 | 1 | 55.4 | 0.83 | 0.07 | 120 | 56 | APOH Beta-2-glycoprotein 1 precursor | n[145]VSFFCK[272]                | 2 | 532.7792 | 2.374 | 0.34  |
| 121 | IPI00298828 | 1 | 55.4 | 0.83 | 0.07 | 120 | 56 | APOH Beta-2-glycoprotein 1 precursor | n[145]NGMLHGDK[272]              | 3 | 387.2093 | 2.933 | 0.211 |
| 121 | IPI00298828 | 1 | 55.4 | 0.83 | 0.07 | 120 | 56 | APOH Beta-2-glycoprotein 1 precursor | n[145]TDASDVK[272]PC             | 2 | 635.3065 | 2.135 | 0.038 |
| 121 | IPI00298828 | 1 | 55.4 | 0.83 | 0.07 | 120 | 56 | APOH Beta-2-glycoprotein 1 precursor | KCSYTEDAQCIDGTIEVPK              | 3 | 871.4124 | 2.845 | 0.254 |
| 121 | IPI00298828 | 1 | 55.4 | 0.83 | 0.07 | 120 | 56 | APOH Beta-2-glycoprotein 1 precursor | VPVKKATVVYQGER                   | 4 | 499.3032 | 2.869 | 0.241 |
| 121 | IPI00298828 | 1 | 55.4 | 0.83 | 0.07 | 120 | 56 | APOH Beta-2-glycoprotein 1 precursor | n[145]VCPFAGILENGAVR             | 3 | 545.9538 | 3.332 | 0.165 |
| 121 | IPI00298828 | 1 | 55.4 | 0.83 | 0.07 | 120 | 56 | APOH Beta-2-glycoprotein 1 precursor | CPFPSRPDNGFVNYPAKPTLY            | 3 | 903.7821 | 3.421 | 0.352 |
| 121 | IPI00298828 | 1 | 55.4 | 0.83 | 0.07 | 120 | 56 | APOH Beta-2-glycoprotein 1 precursor | n[145]CTEEGK[272]                | 2 | 500.7377 | 2     | 0.254 |
| 121 | IPI00298828 | 1 | 55.4 | 0.83 | 0.07 | 120 | 56 | APOH Beta-2-glycoprotein 1 precursor | n[145]CPFPSRPDNGFVNYPAK[272]PTLY | 3 | 906.4535 | 3.778 | 0.307 |
| 121 | IPI00298828 | 1 | 55.4 | 0.83 | 0.07 | 120 | 56 | APOH Beta-2-glycoprotein 1 precursor | CTEEGK                           | 2 | 496.7306 | 2.025 | 0.182 |
| 121 | IPI00298828 | 1 | 55.4 | 0.83 | 0.07 | 120 | 56 | APOH Beta-2-glycoprotein 1 precursor | GFVNYPAKPTLYYK                   | 3 | 694.391  | 2.945 | 0.328 |
| 121 | IPI00298828 | 1 | 55.4 | 0.83 | 0.07 | 120 | 56 | APOH Beta-2-glycoprotein 1 precursor | n[145]NGMLHGDK[272]              | 2 | 580.3103 | 1.787 | 0.225 |
| 121 | IPI00298828 | 1 | 55.4 | 0.83 | 0.07 | 120 | 56 | APOH Beta-2-glycoprotein 1 precursor | n[145]ATVVYQGER                  | 3 | 389.5477 | 2.11  | 0.148 |
| 121 | IPI00298828 | 1 | 55.4 | 0.83 | 0.07 | 120 | 56 | APOH Beta-2-glycoprotein 1 precursor | ASCKVPVKK                        | 4 | 392.2401 | 2.392 | 0.189 |
| 121 | IPI00298828 | 1 | 55.4 | 0.83 | 0.07 | 120 | 56 | APOH Beta-2-glycoprotein 1 precursor | VPVKK                            | 2 | 495.8448 | 1.377 | 0.197 |
| 121 | IPI00298828 | 1 | 55.4 | 0.83 | 0.07 | 120 | 56 | APOH Beta-2-glycoprotein 1 precursor | n[145]AGILENGAVR                 | 2 | 572.3338 | 3.674 | 0.279 |
| 121 | IPI00298828 | 1 | 55.4 | 0.83 | 0.07 | 120 | 56 | APOH Beta-2-glycoprotein 1 precursor | AGILENGAVR                       | 2 | 570.3302 | 2.956 | 0.249 |
| 121 | IPI00298828 | 1 | 55.4 | 0.83 | 0.07 | 120 | 56 | APOH Beta-2-glycoprotein 1 precursor | VKIQEK                           | 2 | 582.8768 | 2.357 | 0.026 |
| 121 | IPI00298828 | 1 | 55.4 | 0.83 | 0.07 | 120 | 56 | APOH Beta-2-glycoprotein 1 precursor | n[145]VK[272]IQEK[272]           | 3 | 392.9274 | 2.283 | 0.021 |
| 121 | IPI00298828 | 1 | 55.4 | 0.83 | 0.07 | 120 | 56 | APOH Beta-2-glycoprotein 1 precursor | n[145]VPVK[272]K[272]            | 2 | 501.8555 | 1.068 | 0.188 |
| 121 | IPI00298828 | 1 | 55.4 | 0.83 | 0.07 | 120 | 56 | APOH Beta-2-glycoprotein 1 precursor | EHSSLAFWK[272]                   | 2 | 694.8758 | 2.419 | 0.338 |
| 121 | IPI00298828 | 1 | 55.4 | 0.83 | 0.07 | 120 | 56 | APOH Beta-2-glycoprotein 1 precursor | n[145]GFVNYPAK[272]PTLYYK[272]   | 3 | 698.3981 | 2.929 | 0.292 |
| 121 | IPI00298828 | 1 | 55.4 | 0.83 | 0.07 | 120 | 56 | APOH Beta-2-glycoprotein 1 precursor | n[145]VK[272]IQEK[272]           | 2 | 588.8875 | 1.819 | 0.055 |
| 121 | IPI00298828 | 1 | 55.4 | 0.83 | 0.07 | 120 | 56 | APOH Beta-2-glycoprotein 1 precursor | FKNGM[147]LHGDK                  | 3 | 528.289  | 1.997 | 0.146 |
| 121 | IPI00298828 | 1 | 55.4 | 0.83 | 0.07 | 120 | 56 | APOH Beta-2-glycoprotein 1 precursor | LPFSTVPLK                        | 2 | 690.9343 | 2.678 | 0.251 |
| 121 | IPI00298828 | 1 | 55.4 | 0.83 | 0.07 | 120 | 56 | APOH Beta-2-glycoprotein 1 precursor | SCKPGYVSR                        | 3 | 441.5618 | 2.16  | 0.136 |
| 121 | IPI00298828 | 1 | 55.4 | 0.83 | 0.07 | 120 | 56 | APOH Beta-2-glycoprotein 1 precursor | n[145]CSYTEDAQCIDGTIEVPK[272]    | 3 | 784.6872 | 2.055 | 0.021 |
| 121 | IPI00298828 | 1 | 55.4 | 0.83 | 0.07 | 120 | 56 | APOH Beta-2-glycoprotein 1 precursor | YPAKPTLYYK                       | 3 | 555.3239 | 1.737 | 0.171 |
| 121 | IPI00298828 | 1 | 55.4 | 0.83 | 0.07 | 120 | 56 | APOH Beta-2-glycoprotein 1 precursor | KFICPL                           | 2 | 523.7981 | 1.565 | 0.101 |
| 121 | IPI00298828 | 1 | 55.4 | 0.83 | 0.07 | 120 | 56 | APOH Beta-2-glycoprotein 1 precursor | n[145]VYK[272]PSAG               | 2 | 505.2997 | 1.716 | 0.123 |
| 121 | IPI00298828 | 1 | 55.4 | 0.83 | 0.07 | 120 | 56 | APOH Beta-2-glycoprotein 1 precursor | n[145]ATFGCHDGY                  | 2 | 580.7347 | 1.5   | 0.112 |
| 122 | IPI00298971 | 1 | 34.3 | 0.65 | 0.24 | 72  | 40 | VTN Vitronectin precursor            | n[145]CTEGFNVDK[272]K[272]       | 2 | 809.9183 | 3.12  | 0.41  |
| 122 | IPI00298971 | 1 | 34.3 | 0.65 | 0.24 | 72  | 40 | VTN Vitronectin precursor            | n[145]SIAQYWLGCAPGHL             | 2 | 901.9456 | 1.595 | 0.091 |
| 122 | IPI00298971 | 1 | 34.3 | 0.65 | 0.24 | 72  | 40 | VTN Vitronectin precursor            | n[145]CTEGFNVDK[272]K[272]       | 3 | 540.2813 | 3.202 | 0.142 |
| 122 | IPI00298971 | 1 | 34.3 | 0.65 | 0.24 | 72  | 40 | VTN Vitronectin precursor            | n[145]DWHGVPQVDAAM[147]AGR       | 3 | 609.629  | 4.981 | 0.522 |
| 122 | IPI00298971 | 1 | 34.3 | 0.65 | 0.24 | 72  | 40 | VTN Vitronectin precursor            | AVRPGYPK                         | 3 | 389.9048 | 2.575 | 0.27  |
| 122 | IPI00298971 | 1 | 34.3 | 0.65 | 0.24 | 72  | 40 | VTN Vitronectin precursor            | CTEGFNVDKK                       | 3 | 536.2742 | 2.8   | 0.309 |
| 122 | IPI00298971 | 1 | 34.3 | 0.65 | 0.24 | 72  | 40 | VTN Vitronectin precursor            | DWHGVPQVDAAM[147]AGR             | 3 | 608.2933 | 3.571 | 0.327 |
| 122 | IPI00298971 | 1 | 34.3 | 0.65 | 0.24 | 72  | 40 | VTN Vitronectin precursor            | n[145]AVRPGYPK[272]              | 3 | 392.5762 | 2.304 | 0.372 |
| 122 | IPI00298971 | 1 | 34.3 | 0.65 | 0.24 | 72  | 40 | VTN Vitronectin precursor            | n[145]SIAQYWLGCAPGHL             | 3 | 601.6328 | 3.192 | 0.279 |
| 122 | IPI00298971 | 1 | 34.3 | 0.65 | 0.24 | 72  | 40 | VTN Vitronectin precursor            | n[145]CTEGFNVDK[272]             | 2 | 673.8198 | 2.955 | 0.378 |
| 122 | IPI00298971 | 1 | 34.3 | 0.65 | 0.24 | 72  | 40 | VTN Vitronectin precursor            | n[145]DWHGVPQVDAAM[147]AGR       | 2 | 913.9399 | 2.423 | 0.291 |
| 122 | IPI00298971 | 1 | 34.3 | 0.65 | 0.24 | 72  | 40 | VTN Vitronectin precursor            | n[145]GIPDNVDAALALPAHSYSGR       | 3 | 723.3787 | 4.575 | 0.383 |
| 122 | IPI00298971 | 1 | 34.3 | 0.65 | 0.24 | 72  | 40 | VTN Vitronectin precursor            | SIAQYWLGCAPGHL                   | 2 | 899.942  | 4.337 | 0.415 |
| 122 | IPI00298971 | 1 | 34.3 | 0.65 | 0.24 | 72  | 40 | VTN Vitronectin precursor            | n[145]IYISGM[147]APRPSLAK[272]   | 3 | 603.3496 | 1.966 | 0.046 |
| 122 | IPI00298971 | 1 | 34.3 | 0.65 | 0.24 | 72  | 40 | VTN Vitronectin precursor            | DWHGVPQVDAAMAGR                  | 2 | 903.9389 | 3.748 | 0.433 |
| 122 | IPI00298971 | 1 | 34.3 | 0.65 | 0.24 | 72  | 40 | VTN Vitronectin precursor            | AVRPGYPK                         | 2 | 584.3535 | 2.974 | 0.252 |
| 122 | IPI00298971 | 1 | 34.3 | 0.65 | 0.24 | 72  | 40 | VTN Vitronectin precursor            | CTDYTAECKPQVTR                   | 3 | 662.9683 | 3.535 | 0.369 |



|     |             |   |      |      |      |    |    |                                                                       |                                   |   |          |       |       |
|-----|-------------|---|------|------|------|----|----|-----------------------------------------------------------------------|-----------------------------------|---|----------|-------|-------|
| 122 | IPI00298971 | 1 | 34.3 | 0.65 | 0.24 | 72 | 40 | VTN Vitronectin precursor                                             | n[145]AVRPGYPK[272]               | 2 | 588.3606 | 2.463 | 0.252 |
| 122 | IPI00298971 | 1 | 34.3 | 0.65 | 0.24 | 72 | 40 | VTN Vitronectin precursor                                             | RVDTVDPYPR                        | 3 | 485.5965 | 2.764 | 0.186 |
| 122 | IPI00298971 | 1 | 34.3 | 0.65 | 0.24 | 72 | 40 | VTN Vitronectin precursor                                             | CTEGFNVDK                         | 2 | 669.8127 | 2.469 | 0.216 |
| 122 | IPI00298971 | 1 | 34.3 | 0.65 | 0.24 | 72 | 40 | VTN Vitronectin precursor                                             | VYFFK                             | 2 | 492.2893 | 1.735 | 0.167 |
| 122 | IPI00298971 | 1 | 34.3 | 0.65 | 0.24 | 72 | 40 | VTN Vitronectin precursor                                             | CTEGFNVDKK                        | 2 | 803.9077 | 3.969 | 0.171 |
| 122 | IPI00298971 | 1 | 34.3 | 0.65 | 0.24 | 72 | 40 | VTN Vitronectin precursor                                             | n[145]RVDTVDPYPR                  | 3 | 486.9322 | 2.713 | 0.095 |
| 122 | IPI00298971 | 1 | 34.3 | 0.65 | 0.24 | 72 | 40 | VTN Vitronectin precursor                                             | n[145]DVWGIEGPIDAAFTR             | 2 | 895.9633 | 3.265 | 0.512 |
| 122 | IPI00298971 | 1 | 34.3 | 0.65 | 0.24 | 72 | 40 | VTN Vitronectin precursor                                             | n[145]FEDGVLDPDYPR                | 2 | 783.8815 | 2.38  | 0.226 |
| 122 | IPI00298971 | 1 | 34.3 | 0.65 | 0.24 | 72 | 40 | VTN Vitronectin precursor                                             | n[145]CTDYTAECK[272]PQVTR         | 3 | 665.6397 | 3.061 | 0.241 |
| 122 | IPI00298971 | 1 | 34.3 | 0.65 | 0.24 | 72 | 40 | VTN Vitronectin precursor                                             | TYLTK                             | 2 | 476.2868 | 2.071 | 0     |
| 122 | IPI00298971 | 1 | 34.3 | 0.65 | 0.24 | 72 | 40 | VTN Vitronectin precursor                                             | n[145]GQYCYELDEK[272]             | 2 | 791.362  | 4.259 | 0.322 |
| 122 | IPI00298971 | 1 | 34.3 | 0.65 | 0.24 | 72 | 40 | VTN Vitronectin precursor                                             | n[145]VYFFK[272]GK[272]           | 2 | 660.9057 | 2.113 | 0.19  |
| 122 | IPI00298971 | 1 | 34.3 | 0.65 | 0.24 | 72 | 40 | VTN Vitronectin precursor                                             | n[145]TYLTK[272]                  | 2 | 480.2939 | 1.729 | 0.177 |
| 122 | IPI00298971 | 1 | 34.3 | 0.65 | 0.24 | 72 | 40 | VTN Vitronectin precursor                                             | QPQFISR                           | 2 | 508.2878 | 1.693 | 0.036 |
| 122 | IPI00298971 | 1 | 34.3 | 0.65 | 0.24 | 72 | 40 | VTN Vitronectin precursor                                             | WLGCPAPGHL                        | 2 | 618.8045 | 2.634 | 0.334 |
| 122 | IPI00298971 | 1 | 34.3 | 0.65 | 0.24 | 72 | 40 | VTN Vitronectin precursor                                             | n[145]YISGMAPR                    | 2 | 576.3218 | 2.561 | 0.315 |
| 122 | IPI00298971 | 1 | 34.3 | 0.65 | 0.24 | 72 | 40 | VTN Vitronectin precursor                                             | n[145]WLGCPAPGHL                  | 2 | 620.808  | 2.482 | 0.359 |
| 122 | IPI00298971 | 1 | 34.3 | 0.65 | 0.24 | 72 | 40 | VTN Vitronectin precursor                                             | GCPAPGHL                          | 2 | 469.2228 | 2.039 | 0.306 |
| 122 | IPI00298971 | 1 | 34.3 | 0.65 | 0.24 | 72 | 40 | VTN Vitronectin precursor                                             | n[145]VYFFK[272]GK[272]           | 3 | 440.9395 | 2.36  | 0.04  |
| 122 | IPI00298971 | 1 | 34.3 | 0.65 | 0.24 | 72 | 40 | VTN Vitronectin precursor                                             | n[145]YISGM[147]APR               | 2 | 584.3193 | 1.948 | 0.096 |
| 122 | IPI00298971 | 1 | 34.3 | 0.65 | 0.24 | 72 | 40 | VTN Vitronectin precursor                                             | VRPGYPK                           | 3 | 366.2257 | 2.57  | 0.086 |
| 122 | IPI00298971 | 1 | 34.3 | 0.65 | 0.24 | 72 | 40 | VTN Vitronectin precursor                                             | n[145]GCPAPGHL                    | 2 | 471.2263 | 1.735 | 0.164 |
| 122 | IPI00298971 | 1 | 34.3 | 0.65 | 0.24 | 72 | 40 | VTN Vitronectin precursor                                             | n[145]VRPGYPK[272]                | 3 | 368.8971 | 2.306 | 0.118 |
| 122 | IPI00298971 | 1 | 34.3 | 0.65 | 0.24 | 72 | 40 | VTN Vitronectin precursor                                             | RPGYPK                            | 3 | 333.2029 | 2.036 | 0.171 |
| 122 | IPI00298971 | 1 | 34.3 | 0.65 | 0.24 | 72 | 40 | VTN Vitronectin precursor                                             | n[145]VRPGYPK[272]                | 2 | 552.8421 | 1.751 | 0.138 |
| 123 | IPI00299435 | 1 | 8.1  | 0.72 | 0.05 | 7  | 4  | APOF apolipoprotein F precursor                                       | SGVQQLIQYYQDQK                    | 3 | 660.018  | 4.386 | 0.457 |
| 123 | IPI00299435 | 1 | 8.1  | 0.72 | 0.05 | 7  | 4  | APOF apolipoprotein F precursor                                       | n[145]SGVQQLIQYYQDQK[272]         | 3 | 662.6894 | 4.622 | 0.323 |
| 123 | IPI00299435 | 1 | 8.1  | 0.72 | 0.05 | 7  | 4  | APOF apolipoprotein F precursor                                       | n[145]DANISQPETTK[272]            | 2 | 746.3983 | 3.739 | 0.295 |
| 123 | IPI00299435 | 1 | 8.1  | 0.72 | 0.05 | 7  | 4  | APOF apolipoprotein F precursor                                       | DANISQPETTK                       | 2 | 742.3912 | 3.294 | 0.336 |
| 124 | IPI00299503 | 1 | 7.4  | 0.87 | 0.1  | 8  | 7  | GPLD1 Isoform 1 of Phosphatidylinositol-glycan-specific phospholipase | GIVAAFYSGPSLSDKEK                 | 3 | 730.4037 | 4.998 | 0.454 |
| 124 | IPI00299503 | 1 | 7.4  | 0.87 | 0.1  | 8  | 7  | GPLD1 Isoform 1 of Phosphatidylinositol-glycan-specific phospholipase | n[145]GIVAAFYSGPSLSDK[272]EK[272] | 3 | 734.4108 | 3.697 | 0.379 |
| 124 | IPI00299503 | 1 | 7.4  | 0.87 | 0.1  | 8  | 7  | GPLD1 Isoform 1 of Phosphatidylinositol-glycan-specific phospholipase | n[145]AQYVLISPEASSR               | 2 | 782.9262 | 3.672 | 0.365 |
| 124 | IPI00299503 | 1 | 7.4  | 0.87 | 0.1  | 8  | 7  | GPLD1 Isoform 1 of Phosphatidylinositol-glycan-specific phospholipase | IADVTSLIGGEDGR                    | 2 | 800.4205 | 3.937 | 0.398 |
| 124 | IPI00299503 | 1 | 7.4  | 0.87 | 0.1  | 8  | 7  | GPLD1 Isoform 1 of Phosphatidylinositol-glycan-specific phospholipase | n[145]IADVTSLIGGEDGR              | 2 | 802.424  | 3.186 | 0.452 |
| 124 | IPI00299503 | 1 | 7.4  | 0.87 | 0.1  | 8  | 7  | GPLD1 Isoform 1 of Phosphatidylinositol-glycan-specific phospholipase | n[145]LYPTYSTK[272]               | 2 | 630.8576 | 2.516 | 0.166 |
| 124 | IPI00299503 | 1 | 7.4  | 0.87 | 0.1  | 8  | 7  | GPLD1 Isoform 1 of Phosphatidylinositol-glycan-specific phospholipase | n[145]NQVVIAAGR                   | 2 | 536.3232 | 2.762 | 0.048 |
| 125 | IPI00299778 | 1 | 4.5  | 0.95 | 0.04 | 3  | 3  | PON3 Serum paraoxonase/lactonase 3                                    | ILIGTVFHK                         | 2 | 654.4136 | 3.096 | 0.179 |
| 125 | IPI00299778 | 1 | 4.5  | 0.95 | 0.04 | 3  | 3  | PON3 Serum paraoxonase/lactonase 3                                    | n[145]STVEIFK[272]                | 2 | 556.3337 | 2.331 | 0.232 |
| 125 | IPI00299778 | 1 | 4.5  | 0.95 | 0.04 | 3  | 3  | PON3 Serum paraoxonase/lactonase 3                                    | n[145]ILIGTVFHK[272]              | 3 | 439.2829 | 3.231 | 0.154 |
| 125 | IPI00299778 | 1 | 4.5  | 0.95 | 0.04 | 3  | 3  | PON3 Serum paraoxonase/lactonase 3                                    | STVEIFK                           | 2 | 552.3266 | 1.676 | 0.141 |
| 125 | IPI00299778 | 1 | 4.5  | 0.95 | 0.04 | 3  | 3  | PON3 Serum paraoxonase/lactonase 3                                    | n[145]ILIGTVFHK[272]              | 2 | 658.4207 | 2.654 | 0.121 |
| 126 | IPI00303963 | 1 | 20.9 | 0.75 | 0.05 | 40 | 26 | C2 Complement C2 precursor (Fragment)                                 | n[145]RNDYLDIYAIGVGK[272]         | 2 | 943.0248 | 4.34  | 0.495 |
| 126 | IPI00303963 | 1 | 20.9 | 0.75 | 0.05 | 40 | 26 | C2 Complement C2 precursor (Fragment)                                 | ALHQVFEHMLDVSK                    | 3 | 645.3488 | 4.757 | 0.432 |
| 126 | IPI00303963 | 1 | 20.9 | 0.75 | 0.05 | 40 | 26 | C2 Complement C2 precursor (Fragment)                                 | ALHQVFEHM[147]LDVSK               | 3 | 650.6804 | 4.556 | 0.419 |
| 126 | IPI00303963 | 1 | 20.9 | 0.75 | 0.05 | 40 | 26 | C2 Complement C2 precursor (Fragment)                                 | KNQGILEFYGDIDALLK                 | 3 | 786.4458 | 4.331 | 0.399 |
| 126 | IPI00303963 | 1 | 20.9 | 0.75 | 0.05 | 40 | 26 | C2 Complement C2 precursor (Fragment)                                 | n[145]ALHQVFEHMLDVSK[272]         | 3 | 648.0202 | 4.899 | 0.455 |
| 126 | IPI00303963 | 1 | 20.9 | 0.75 | 0.05 | 40 | 26 | C2 Complement C2 precursor (Fragment)                                 | n[145]RNDYLDIYAIGVGK[272]         | 3 | 629.0189 | 4.135 | 0.397 |
| 126 | IPI00303963 | 1 | 20.9 | 0.75 | 0.05 | 40 | 26 | C2 Complement C2 precursor (Fragment)                                 | n[145]AVISPGFDVFAK[272]           | 2 | 769.9447 | 3.693 | 0.295 |

|     |             |   |      |      |      |     |    |                                       |                                |   |           |       |       |
|-----|-------------|---|------|------|------|-----|----|---------------------------------------|--------------------------------|---|-----------|-------|-------|
| 126 | IPI00303963 | 1 | 20.9 | 0.75 | 0.05 | 40  | 26 | C2 Complement C2 precursor (Fragment) | RNDYLDIYAIGVGK                 | 3 | 626.3475  | 3.784 | 0.335 |
| 126 | IPI00303963 | 1 | 20.9 | 0.75 | 0.05 | 40  | 26 | C2 Complement C2 precursor (Fragment) | n[145]ALHQVFEHM[147]LDVSK[272] | 3 | 653.3518  | 3.634 | 0.453 |
| 126 | IPI00303963 | 1 | 20.9 | 0.75 | 0.05 | 40  | 26 | C2 Complement C2 precursor (Fragment) | AVISPGFDVFAK                   | 2 | 765.9376  | 3.816 | 0.308 |
| 126 | IPI00303963 | 1 | 20.9 | 0.75 | 0.05 | 40  | 26 | C2 Complement C2 precursor (Fragment) | n[145]GESGGAVFLER              | 2 | 633.334   | 3.85  | 0.379 |
| 126 | IPI00303963 | 1 | 20.9 | 0.75 | 0.05 | 40  | 26 | C2 Complement C2 precursor (Fragment) | n[145]HAIILLTDGK[272]          | 2 | 684.9263  | 3.213 | 0.395 |
| 126 | IPI00303963 | 1 | 20.9 | 0.75 | 0.05 | 40  | 26 | C2 Complement C2 precursor (Fragment) | DHENELLNK                      | 2 | 696.3676  | 3.624 | 0.326 |
| 126 | IPI00303963 | 1 | 20.9 | 0.75 | 0.05 | 40  | 26 | C2 Complement C2 precursor (Fragment) | HAFILQDTK                      | 2 | 676.8879  | 2.603 | 0.358 |
| 126 | IPI00303963 | 1 | 20.9 | 0.75 | 0.05 | 40  | 26 | C2 Complement C2 precursor (Fragment) | EILNINQK                       | 2 | 626.3746  | 1.604 | 0.035 |
| 126 | IPI00303963 | 1 | 20.9 | 0.75 | 0.05 | 40  | 26 | C2 Complement C2 precursor (Fragment) | RNDYLDIYAIGVGK                 | 2 | 939.0177  | 3.637 | 0.384 |
| 126 | IPI00303963 | 1 | 20.9 | 0.75 | 0.05 | 40  | 26 | C2 Complement C2 precursor (Fragment) | HAFILQDTK                      | 3 | 451.5944  | 2.877 | 0.074 |
| 126 | IPI00303963 | 1 | 20.9 | 0.75 | 0.05 | 40  | 26 | C2 Complement C2 precursor (Fragment) | n[145]DFHINLFR                 | 2 | 603.331   | 2.727 | 0.208 |
| 126 | IPI00303963 | 1 | 20.9 | 0.75 | 0.05 | 40  | 26 | C2 Complement C2 precursor (Fragment) | n[145]EILNINQK[272]            | 2 | 630.3817  | 2.486 | 0.004 |
| 126 | IPI00303963 | 1 | 20.9 | 0.75 | 0.05 | 40  | 26 | C2 Complement C2 precursor (Fragment) | n[145]HAFILQDTK[272]           | 2 | 680.895   | 2.642 | 0.247 |
| 126 | IPI00303963 | 1 | 20.9 | 0.75 | 0.05 | 40  | 26 | C2 Complement C2 precursor (Fragment) | n[145]VLMSVLNDNSR              | 2 | 696.3753  | 3.072 | 0.271 |
| 126 | IPI00303963 | 1 | 20.9 | 0.75 | 0.05 | 40  | 26 | C2 Complement C2 precursor (Fragment) | ELNELGSK                       | 2 | 585.3299  | 2.15  | 0.138 |
| 126 | IPI00303963 | 1 | 20.9 | 0.75 | 0.05 | 40  | 26 | C2 Complement C2 precursor (Fragment) | n[145]DFHINLFR                 | 3 | 402.5564  | 2.67  | 0.035 |
| 126 | IPI00303963 | 1 | 20.9 | 0.75 | 0.05 | 40  | 26 | C2 Complement C2 precursor (Fragment) | n[145]QHLGDLNLFPL              | 2 | 755.4309  | 1.685 | 0.172 |
| 126 | IPI00303963 | 1 | 20.9 | 0.75 | 0.05 | 40  | 26 | C2 Complement C2 precursor (Fragment) | n[145]SCPQGLYSPASR             | 2 | 776.8721  | 3.764 | 0.399 |
| 126 | IPI00303963 | 1 | 20.9 | 0.75 | 0.05 | 40  | 26 | C2 Complement C2 precursor (Fragment) | n[145]ELNELGSK[272]            | 2 | 589.337   | 1.757 | 0.036 |
| 126 | IPI00303963 | 1 | 20.9 | 0.75 | 0.05 | 40  | 26 | C2 Complement C2 precursor (Fragment) | n[145]DIALK[272]               | 2 | 480.8203  | 1.803 | 1     |
| 126 | IPI00303963 | 1 | 20.9 | 0.75 | 0.05 | 40  | 26 | C2 Complement C2 precursor (Fragment) | n[145]DFHINLF                  | 2 | 525.2805  | 1.727 | 0.093 |
| 126 | IPI00303963 | 1 | 20.9 | 0.75 | 0.05 | 40  | 26 | C2 Complement C2 precursor (Fragment) | SK[272]K[272]                  | 2 | 395.7731  | 0.913 | 0.136 |
| 126 | IPI00303963 | 1 | 20.9 | 0.75 | 0.05 | 40  | 26 | C2 Complement C2 precursor (Fragment) | n[145]VFAK[272]K[272]          | 2 | 512.8476  | 1.081 | 0.047 |
| 127 | IPI00304273 | 1 | 70.2 | 0.92 | 0.07 | 114 | 78 | APOA4 Apolipoprotein A-IV precursor   | LGEVNTYAGDLQK                  | 2 | 844.4544  | 3.721 | 0.491 |
| 127 | IPI00304273 | 1 | 70.2 | 0.92 | 0.07 | 114 | 78 | APOA4 Apolipoprotein A-IV precursor   | LNHQLEGLTFQM[147]K             | 2 | 927.9984  | 4.596 | 0.476 |
| 127 | IPI00304273 | 1 | 70.2 | 0.92 | 0.07 | 114 | 78 | APOA4 Apolipoprotein A-IV precursor   | SELTQQLNALFQDK                 | 2 | 958.0179  | 5.248 | 0.418 |
| 127 | IPI00304273 | 1 | 70.2 | 0.92 | 0.07 | 114 | 78 | APOA4 Apolipoprotein A-IV precursor   | SLAPYAQDTQEK                   | 2 | 815.9254  | 4.434 | 0.377 |
| 127 | IPI00304273 | 1 | 70.2 | 0.92 | 0.07 | 114 | 78 | APOA4 Apolipoprotein A-IV precursor   | TQVNTQAEQLR                    | 2 | 714.3837  | 3.594 | 0.329 |
| 127 | IPI00304273 | 1 | 70.2 | 0.92 | 0.07 | 114 | 78 | APOA4 Apolipoprotein A-IV precursor   | VNSFFSTFK                      | 2 | 678.8692  | 3.514 | 0.453 |
| 127 | IPI00304273 | 1 | 70.2 | 0.92 | 0.07 | 114 | 78 | APOA4 Apolipoprotein A-IV precursor   | n[145]DK[272]VNSFFSTFK[272]    | 2 | 876.4883  | 3.855 | 0.43  |
| 127 | IPI00304273 | 1 | 70.2 | 0.92 | 0.07 | 114 | 78 | APOA4 Apolipoprotein A-IV precursor   | n[145]LGEVNTYAGDLQK[272]       | 2 | 848.4615  | 4.84  | 0.492 |
| 127 | IPI00304273 | 1 | 70.2 | 0.92 | 0.07 | 114 | 78 | APOA4 Apolipoprotein A-IV precursor   | n[145]LNHQLEGLTFQM[147]K[272]  | 2 | 932.0055  | 4.781 | 0.455 |
| 127 | IPI00304273 | 1 | 70.2 | 0.92 | 0.07 | 114 | 78 | APOA4 Apolipoprotein A-IV precursor   | n[145]SELTQQLNALFQDK[272]      | 2 | 962.025   | 5.797 | 0.477 |
| 127 | IPI00304273 | 1 | 70.2 | 0.92 | 0.07 | 114 | 78 | APOA4 Apolipoprotein A-IV precursor   | n[145]SLAELGGHLDQQVEEFR        | 2 | 1036.5301 | 5.457 | 0.58  |
| 127 | IPI00304273 | 1 | 70.2 | 0.92 | 0.07 | 114 | 78 | APOA4 Apolipoprotein A-IV precursor   | n[145]VEPYGENFNK[272]          | 2 | 742.8849  | 3.807 | 0.434 |
| 127 | IPI00304273 | 1 | 70.2 | 0.92 | 0.07 | 114 | 78 | APOA4 Apolipoprotein A-IV precursor   | n[145]VNSFFSTFK[272]           | 2 | 682.8763  | 3.489 | 0.456 |
| 127 | IPI00304273 | 1 | 70.2 | 0.92 | 0.07 | 114 | 78 | APOA4 Apolipoprotein A-IV precursor   | DKVNSFFSTFK                    | 3 | 580.6542  | 1.966 | 0.183 |
| 127 | IPI00304273 | 1 | 70.2 | 0.92 | 0.07 | 114 | 78 | APOA4 Apolipoprotein A-IV precursor   | KLVPFATELHER                   | 3 | 574.0017  | 3.902 | 0.396 |
| 127 | IPI00304273 | 1 | 70.2 | 0.92 | 0.07 | 114 | 78 | APOA4 Apolipoprotein A-IV precursor   | LGPHAGDVEGHLSFLEK              | 3 | 696.0409  | 3.248 | 0.454 |
| 127 | IPI00304273 | 1 | 70.2 | 0.92 | 0.07 | 114 | 78 | APOA4 Apolipoprotein A-IV precursor   | LNHQLEGLTFQMK                  | 3 | 613.6697  | 4.61  | 0.35  |
| 127 | IPI00304273 | 1 | 70.2 | 0.92 | 0.07 | 114 | 78 | APOA4 Apolipoprotein A-IV precursor   | LNHQLEGLTFQM[147]K             | 3 | 619.0014  | 4.682 | 0.493 |
| 127 | IPI00304273 | 1 | 70.2 | 0.92 | 0.07 | 114 | 78 | APOA4 Apolipoprotein A-IV precursor   | LVPFATELHER                    | 3 | 484.605   | 4.923 | 0.453 |
| 127 | IPI00304273 | 1 | 70.2 | 0.92 | 0.07 | 114 | 78 | APOA4 Apolipoprotein A-IV precursor   | n[145]DK[272]VNSFFSTFK[272]    | 3 | 584.6613  | 4.255 | 0.464 |
| 127 | IPI00304273 | 1 | 70.2 | 0.92 | 0.07 | 114 | 78 | APOA4 Apolipoprotein A-IV precursor   | n[145]LGPHAGDVEGHLSFLEK[272]   | 3 | 698.7123  | 4.094 | 0.412 |
| 127 | IPI00304273 | 1 | 70.2 | 0.92 | 0.07 | 114 | 78 | APOA4 Apolipoprotein A-IV precursor   | n[145]LNHQLEGLTFQMK[272]       | 3 | 616.3411  | 4.275 | 0.392 |
| 127 | IPI00304273 | 1 | 70.2 | 0.92 | 0.07 | 114 | 78 | APOA4 Apolipoprotein A-IV precursor   | n[145]LNHQLEGLTFQM[147]K[272]  | 3 | 621.6728  | 4.357 | 0.332 |
| 127 | IPI00304273 | 1 | 70.2 | 0.92 | 0.07 | 114 | 78 | APOA4 Apolipoprotein A-IV precursor   | n[145]RVEPYGENFNK[272]         | 3 | 547.626   | 4.476 | 0.357 |
| 127 | IPI00304273 | 1 | 70.2 | 0.92 | 0.07 | 114 | 78 | APOA4 Apolipoprotein A-IV precursor   | n[145]SLAELGGHLDQQVEEFR        | 3 | 691.3558  | 5.635 | 0.548 |

|     |             |   |      |      |      |     |    |                                     |                               |   |          |       |       |
|-----|-------------|---|------|------|------|-----|----|-------------------------------------|-------------------------------|---|----------|-------|-------|
| 127 | IPI00304273 | 1 | 70.2 | 0.92 | 0.07 | 114 | 78 | APOA4 Apolipoprotein A-IV precursor | n[145]ENADSLQASLRPHADELK[272] | 3 | 761.4042 | 4.344 | 0.255 |
| 127 | IPI00304273 | 1 | 70.2 | 0.92 | 0.07 | 114 | 78 | APOA4 Apolipoprotein A-IV precursor | n[145]LGPHAGDVEGHLSFLEK[272]  | 4 | 524.286  | 2.747 | 0.296 |
| 127 | IPI00304273 | 1 | 70.2 | 0.92 | 0.07 | 114 | 78 | APOA4 Apolipoprotein A-IV precursor | EAVEHLQK                      | 2 | 617.3512 | 3.055 | 0.252 |
| 127 | IPI00304273 | 1 | 70.2 | 0.92 | 0.07 | 114 | 78 | APOA4 Apolipoprotein A-IV precursor | n[145]RVEPYGENFNK[272]        | 2 | 820.9354 | 4.105 | 0.319 |
| 127 | IPI00304273 | 1 | 70.2 | 0.92 | 0.07 | 114 | 78 | APOA4 Apolipoprotein A-IV precursor | n[145]TQVNTQAEQLR             | 2 | 716.3873 | 3.897 | 0.251 |
| 127 | IPI00304273 | 1 | 70.2 | 0.92 | 0.07 | 114 | 78 | APOA4 Apolipoprotein A-IV precursor | ENADSLQASLRPHADELK            | 3 | 758.7328 | 4.1   | 0.247 |
| 127 | IPI00304273 | 1 | 70.2 | 0.92 | 0.07 | 114 | 78 | APOA4 Apolipoprotein A-IV precursor | RVEPYGENFNK                   | 2 | 816.9283 | 3.964 | 0.307 |
| 127 | IPI00304273 | 1 | 70.2 | 0.92 | 0.07 | 114 | 78 | APOA4 Apolipoprotein A-IV precursor | n[145]EAVEHLQK[272]           | 2 | 621.3583 | 3.404 | 0.267 |
| 127 | IPI00304273 | 1 | 70.2 | 0.92 | 0.07 | 114 | 78 | APOA4 Apolipoprotein A-IV precursor | KNAEELK                       | 3 | 417.9189 | 2.821 | 0.192 |
| 127 | IPI00304273 | 1 | 70.2 | 0.92 | 0.07 | 114 | 78 | APOA4 Apolipoprotein A-IV precursor | n[145]LLPHANEVSQK[272]        | 3 | 508.631  | 2.928 | 0.193 |
| 127 | IPI00304273 | 1 | 70.2 | 0.92 | 0.07 | 114 | 78 | APOA4 Apolipoprotein A-IV precursor | ALVQQM[147]EQLR               | 2 | 686.3743 | 2.158 | 0.207 |
| 127 | IPI00304273 | 1 | 70.2 | 0.92 | 0.07 | 114 | 78 | APOA4 Apolipoprotein A-IV precursor | GNTEGLQK                      | 2 | 563.8144 | 3.14  | 0.276 |
| 127 | IPI00304273 | 1 | 70.2 | 0.92 | 0.07 | 114 | 78 | APOA4 Apolipoprotein A-IV precursor | n[145]GNTEGLQK[272]           | 2 | 567.8215 | 2.806 | 0.265 |
| 127 | IPI00304273 | 1 | 70.2 | 0.92 | 0.07 | 114 | 78 | APOA4 Apolipoprotein A-IV precursor | n[145]IDQNVEELK[272]          | 2 | 688.3872 | 3.563 | 0.266 |
| 127 | IPI00304273 | 1 | 70.2 | 0.92 | 0.07 | 114 | 78 | APOA4 Apolipoprotein A-IV precursor | EAVEHLQK                      | 3 | 411.9032 | 3.122 | 0.171 |
| 127 | IPI00304273 | 1 | 70.2 | 0.92 | 0.07 | 114 | 78 | APOA4 Apolipoprotein A-IV precursor | n[145]LK[272]EEIGK[272]ELEELR | 3 | 673.4001 | 3.349 | 0.257 |
| 127 | IPI00304273 | 1 | 70.2 | 0.92 | 0.07 | 114 | 78 | APOA4 Apolipoprotein A-IV precursor | LVPFATELHER                   | 2 | 726.4039 | 3.129 | 0.282 |
| 127 | IPI00304273 | 1 | 70.2 | 0.92 | 0.07 | 114 | 78 | APOA4 Apolipoprotein A-IV precursor | n[145]LLPHANEVSQK[272]        | 2 | 762.4429 | 3.781 | 0.192 |
| 127 | IPI00304273 | 1 | 70.2 | 0.92 | 0.07 | 114 | 78 | APOA4 Apolipoprotein A-IV precursor | LLPHANEVSQK                   | 2 | 758.4358 | 3.034 | 0.245 |
| 127 | IPI00304273 | 1 | 70.2 | 0.92 | 0.07 | 114 | 78 | APOA4 Apolipoprotein A-IV precursor | n[145]LAPLAEDVR               | 2 | 564.3307 | 2.768 | 0.353 |
| 127 | IPI00304273 | 1 | 70.2 | 0.92 | 0.07 | 114 | 78 | APOA4 Apolipoprotein A-IV precursor | n[145]LK[272]EEIGK[272]ELEELR | 4 | 505.3019 | 2.675 | 0.245 |
| 127 | IPI00304273 | 1 | 70.2 | 0.92 | 0.07 | 114 | 78 | APOA4 Apolipoprotein A-IV precursor | IDQNVEELK                     | 2 | 684.3801 | 3.511 | 0.201 |
| 127 | IPI00304273 | 1 | 70.2 | 0.92 | 0.07 | 114 | 78 | APOA4 Apolipoprotein A-IV precursor | n[145]ALVQQM[147]EQLR         | 2 | 688.3779 | 3.01  | 0.238 |
| 127 | IPI00304273 | 1 | 70.2 | 0.92 | 0.07 | 114 | 78 | APOA4 Apolipoprotein A-IV precursor | LKEEIGKELEELR                 | 3 | 669.393  | 3.327 | 0.382 |
| 127 | IPI00304273 | 1 | 70.2 | 0.92 | 0.07 | 114 | 78 | APOA4 Apolipoprotein A-IV precursor | n[145]EAVEHLQK[272]           | 3 | 414.5746 | 2.858 | 0.143 |
| 127 | IPI00304273 | 1 | 70.2 | 0.92 | 0.07 | 114 | 78 | APOA4 Apolipoprotein A-IV precursor | DKVNSFFSTFK                   | 2 | 870.4777 | 4.097 | 0.379 |
| 127 | IPI00304273 | 1 | 70.2 | 0.92 | 0.07 | 114 | 78 | APOA4 Apolipoprotein A-IV precursor | n[145]SLAPYAQDTQEK[272]       | 2 | 819.9325 | 3.277 | 0.297 |
| 127 | IPI00304273 | 1 | 70.2 | 0.92 | 0.07 | 114 | 78 | APOA4 Apolipoprotein A-IV precursor | LLPHANEVSQK                   | 3 | 505.9596 | 3.223 | 0.13  |
| 127 | IPI00304273 | 1 | 70.2 | 0.92 | 0.07 | 114 | 78 | APOA4 Apolipoprotein A-IV precursor | n[145]LVPFATELHER             | 2 | 728.4075 | 2.396 | 0.308 |
| 127 | IPI00304273 | 1 | 70.2 | 0.92 | 0.07 | 114 | 78 | APOA4 Apolipoprotein A-IV precursor | VEPYGENFNK                    | 2 | 738.8778 | 2.818 | 0.253 |
| 127 | IPI00304273 | 1 | 70.2 | 0.92 | 0.07 | 114 | 78 | APOA4 Apolipoprotein A-IV precursor | KNAEELK                       | 2 | 626.3747 | 2.607 | 0.177 |
| 127 | IPI00304273 | 1 | 70.2 | 0.92 | 0.07 | 114 | 78 | APOA4 Apolipoprotein A-IV precursor | n[145]SLAELGGHLDQQVEEFRR      | 4 | 557.794  | 2.048 | 0.137 |
| 127 | IPI00304273 | 1 | 70.2 | 0.92 | 0.07 | 114 | 78 | APOA4 Apolipoprotein A-IV precursor | KLVPFATELHER                  | 2 | 860.4989 | 3.436 | 0.396 |
| 127 | IPI00304273 | 1 | 70.2 | 0.92 | 0.07 | 114 | 78 | APOA4 Apolipoprotein A-IV precursor | n[145]ISASAEELR               | 2 | 560.31   | 3.128 | 0.138 |
| 127 | IPI00304273 | 1 | 70.2 | 0.92 | 0.07 | 114 | 78 | APOA4 Apolipoprotein A-IV precursor | LAPLAEDVR                     | 2 | 562.3271 | 2.137 | 0.302 |
| 127 | IPI00304273 | 1 | 70.2 | 0.92 | 0.07 | 114 | 78 | APOA4 Apolipoprotein A-IV precursor | LTPYADEFK                     | 2 | 682.3665 | 2.645 | 0.146 |
| 127 | IPI00304273 | 1 | 70.2 | 0.92 | 0.07 | 114 | 78 | APOA4 Apolipoprotein A-IV precursor | QLTPYAQR                      | 2 | 558.8117 | 2.36  | 0.161 |
| 127 | IPI00304273 | 1 | 70.2 | 0.92 | 0.07 | 114 | 78 | APOA4 Apolipoprotein A-IV precursor | n[145]QLTPYAQR                | 2 | 560.8152 | 2.425 | 0.136 |
| 127 | IPI00304273 | 1 | 70.2 | 0.92 | 0.07 | 114 | 78 | APOA4 Apolipoprotein A-IV precursor | n[145]LTPYADEFK[272]          | 2 | 686.3736 | 2.594 | 0.156 |
| 127 | IPI00304273 | 1 | 70.2 | 0.92 | 0.07 | 114 | 78 | APOA4 Apolipoprotein A-IV precursor | n[145]IGDNLR                  | 2 | 416.2439 | 2.512 | 0.094 |
| 127 | IPI00304273 | 1 | 70.2 | 0.92 | 0.07 | 114 | 78 | APOA4 Apolipoprotein A-IV precursor | n[145]ALVQQMEQLR              | 2 | 680.3804 | 2.815 | 0.147 |
| 127 | IPI00304273 | 1 | 70.2 | 0.92 | 0.07 | 114 | 78 | APOA4 Apolipoprotein A-IV precursor | RVEPYGENFNK                   | 3 | 544.9546 | 1.951 | 0.154 |
| 127 | IPI00304273 | 1 | 70.2 | 0.92 | 0.07 | 114 | 78 | APOA4 Apolipoprotein A-IV precursor | n[145]IDQTV EELRR             | 2 | 701.8922 | 2.305 | 0.095 |
| 127 | IPI00304273 | 1 | 70.2 | 0.92 | 0.07 | 114 | 78 | APOA4 Apolipoprotein A-IV precursor | IDQTV EELRR                   | 2 | 699.8886 | 2.168 | 0.07  |
| 127 | IPI00304273 | 1 | 70.2 | 0.92 | 0.07 | 114 | 78 | APOA4 Apolipoprotein A-IV precursor | LKEEIGK                       | 2 | 618.8874 | 3.068 | 0.174 |
| 127 | IPI00304273 | 1 | 70.2 | 0.92 | 0.07 | 114 | 78 | APOA4 Apolipoprotein A-IV precursor | LEPYADQLR                     | 2 | 622.8353 | 1.688 | 0.025 |
| 127 | IPI00304273 | 1 | 70.2 | 0.92 | 0.07 | 114 | 78 | APOA4 Apolipoprotein A-IV precursor | n[145]LNHQLEGLTF              | 2 | 658.36   | 2.387 | 0.292 |
| 127 | IPI00304273 | 1 | 70.2 | 0.92 | 0.07 | 114 | 78 | APOA4 Apolipoprotein A-IV precursor | AKIDQNVEELK                   | 3 | 569.6649 | 1.783 | 0.155 |

|     |             |   |      |      |      |     |    |                                                              |                                 |   |          |       |       |
|-----|-------------|---|------|------|------|-----|----|--------------------------------------------------------------|---------------------------------|---|----------|-------|-------|
| 127 | IPI00304273 | 1 | 70.2 | 0.92 | 0.07 | 114 | 78 | APOA4 Apolipoprotein A-IV precursor                          | LKEEIGKELEELR                   | 4 | 502.2966 | 1.623 | 0.017 |
| 127 | IPI00304273 | 1 | 70.2 | 0.92 | 0.07 | 114 | 78 | APOA4 Apolipoprotein A-IV precursor                          | n[145]IDQTVVEELRR               | 3 | 468.2639 | 2.009 | 0.03  |
| 127 | IPI00304273 | 1 | 70.2 | 0.92 | 0.07 | 114 | 78 | APOA4 Apolipoprotein A-IV precursor                          | LKEEIGK                         | 3 | 412.9274 | 2.127 | 0.074 |
| 127 | IPI00304273 | 1 | 70.2 | 0.92 | 0.07 | 114 | 78 | APOA4 Apolipoprotein A-IV precursor                          | ALFQDK                          | 2 | 501.2926 | 2.179 | 0.087 |
| 127 | IPI00304273 | 1 | 70.2 | 0.92 | 0.07 | 114 | 78 | APOA4 Apolipoprotein A-IV precursor                          | n[145]ALFQDK[272]               | 2 | 505.2997 | 2.387 | 0.021 |
| 128 | IPI00305461 | 1 | 35.2 | 0.74 | 0.12 | 141 | 71 | ITIH2 Inter-alpha-trypsin inhibitor heavy chain H2 precursor | ETAVDGELVVLVDVK                 | 2 | 965.5303 | 4.978 | 0.498 |
| 128 | IPI00305461 | 1 | 35.2 | 0.74 | 0.12 | 141 | 71 | ITIH2 Inter-alpha-trypsin inhibitor heavy chain H2 precursor | IYGNQDTSSQLK                    | 2 | 817.4309 | 4.238 | 0.453 |
| 128 | IPI00305461 | 1 | 35.2 | 0.74 | 0.12 | 141 | 71 | ITIH2 Inter-alpha-trypsin inhibitor heavy chain H2 precursor | n[145]AEDHFSVIDFNQIR            | 2 | 974.9853 | 4.223 | 0.45  |
| 128 | IPI00305461 | 1 | 35.2 | 0.74 | 0.12 | 141 | 71 | ITIH2 Inter-alpha-trypsin inhibitor heavy chain H2 precursor | n[145]ETAVDGELVVLVDVK[272]      | 2 | 969.5374 | 4.777 | 0.497 |
| 128 | IPI00305461 | 1 | 35.2 | 0.74 | 0.12 | 141 | 71 | ITIH2 Inter-alpha-trypsin inhibitor heavy chain H2 precursor | n[145]FYNQVSTPLLR               | 2 | 741.4153 | 1.456 | 0.062 |
| 128 | IPI00305461 | 1 | 35.2 | 0.74 | 0.12 | 141 | 71 | ITIH2 Inter-alpha-trypsin inhibitor heavy chain H2 precursor | n[145]IQPSGGTNINEALLR           | 2 | 863.9821 | 4.084 | 0.389 |
| 128 | IPI00305461 | 1 | 35.2 | 0.74 | 0.12 | 141 | 71 | ITIH2 Inter-alpha-trypsin inhibitor heavy chain H2 precursor | n[145]IYGNQDTSSQLK[272]         | 2 | 821.438  | 4.751 | 0.415 |
| 128 | IPI00305461 | 1 | 35.2 | 0.74 | 0.12 | 141 | 71 | ITIH2 Inter-alpha-trypsin inhibitor heavy chain H2 precursor | FLHVPDTFEGHFDGVPVISK            | 3 | 841.1128 | 2.902 | 0.316 |
| 128 | IPI00305461 | 1 | 35.2 | 0.74 | 0.12 | 141 | 71 | ITIH2 Inter-alpha-trypsin inhibitor heavy chain H2 precursor | KFYNQVSTPLLR                    | 3 | 582.6736 | 3.667 | 0.38  |
| 128 | IPI00305461 | 1 | 35.2 | 0.74 | 0.12 | 141 | 71 | ITIH2 Inter-alpha-trypsin inhibitor heavy chain H2 precursor | KLGSYVHR                        | 3 | 423.9069 | 3.466 | 0.417 |
| 128 | IPI00305461 | 1 | 35.2 | 0.74 | 0.12 | 141 | 71 | ITIH2 Inter-alpha-trypsin inhibitor heavy chain H2 precursor | VVNNSPQPQNVVFDVQIPK             | 3 | 801.4446 | 3.565 | 0.401 |
| 128 | IPI00305461 | 1 | 35.2 | 0.74 | 0.12 | 141 | 71 | ITIH2 Inter-alpha-trypsin inhibitor heavy chain H2 precursor | n[145]FLHVPDTFEGHFDGVPVISK[272] | 3 | 843.7842 | 4.675 | 0.319 |
| 128 | IPI00305461 | 1 | 35.2 | 0.74 | 0.12 | 141 | 71 | ITIH2 Inter-alpha-trypsin inhibitor heavy chain H2 precursor | n[145]VQFELHYQEVK[272]          | 3 | 569.9818 | 4.166 | 0.265 |
| 128 | IPI00305461 | 1 | 35.2 | 0.74 | 0.12 | 141 | 71 | ITIH2 Inter-alpha-trypsin inhibitor heavy chain H2 precursor | n[145]VVNNSPQPQNVVFDVQIPK[272]  | 3 | 804.116  | 3.131 | 0.318 |
| 128 | IPI00305461 | 1 | 35.2 | 0.74 | 0.12 | 141 | 71 | ITIH2 Inter-alpha-trypsin inhibitor heavy chain H2 precursor | n[145]AHVSFK[272]PTVAQQR        | 4 | 440.007  | 3.743 | 0.453 |
| 128 | IPI00305461 | 1 | 35.2 | 0.74 | 0.12 | 141 | 71 | ITIH2 Inter-alpha-trypsin inhibitor heavy chain H2 precursor | n[145]FLHVPDTFEGHFDGVPVISK[272] | 4 | 633.09   | 2.897 | 0.411 |
| 128 | IPI00305461 | 1 | 35.2 | 0.74 | 0.12 | 141 | 71 | ITIH2 Inter-alpha-trypsin inhibitor heavy chain H2 precursor | AHVSFKPTVAQQR                   | 3 | 583.6688 | 3.298 | 0.29  |
| 128 | IPI00305461 | 1 | 35.2 | 0.74 | 0.12 | 141 | 71 | ITIH2 Inter-alpha-trypsin inhibitor heavy chain H2 precursor | n[145]RLSNENHGIAQR              | 3 | 513.6138 | 3.381 | 0.315 |
| 128 | IPI00305461 | 1 | 35.2 | 0.74 | 0.12 | 141 | 71 | ITIH2 Inter-alpha-trypsin inhibitor heavy chain H2 precursor | AHVSFKPTVAQQR                   | 4 | 438.0034 | 2.453 | 0.277 |
| 128 | IPI00305461 | 1 | 35.2 | 0.74 | 0.12 | 141 | 71 | ITIH2 Inter-alpha-trypsin inhibitor heavy chain H2 precursor | TEVNVLPGAK                      | 2 | 654.3878 | 1.922 | 0.099 |
| 128 | IPI00305461 | 1 | 35.2 | 0.74 | 0.12 | 141 | 71 | ITIH2 Inter-alpha-trypsin inhibitor heavy chain H2 precursor | n[145]LSNENHGIAQR               | 2 | 691.8665 | 3.863 | 0.277 |
| 128 | IPI00305461 | 1 | 35.2 | 0.74 | 0.12 | 141 | 71 | ITIH2 Inter-alpha-trypsin inhibitor heavy chain H2 precursor | LSNENHGIAQR                     | 3 | 460.2444 | 2.826 | 0.268 |
| 128 | IPI00305461 | 1 | 35.2 | 0.74 | 0.12 | 141 | 71 | ITIH2 Inter-alpha-trypsin inhibitor heavy chain H2 precursor | n[145]LGSYEHR                   | 3 | 335.846  | 2.75  | 0.225 |
| 128 | IPI00305461 | 1 | 35.2 | 0.74 | 0.12 | 141 | 71 | ITIH2 Inter-alpha-trypsin inhibitor heavy chain H2 precursor | n[145]NFHNYFGGSEIVVAGK[272]     | 3 | 676.3578 | 3.561 | 0.428 |
| 128 | IPI00305461 | 1 | 35.2 | 0.74 | 0.12 | 141 | 71 | ITIH2 Inter-alpha-trypsin inhibitor heavy chain H2 precursor | n[145]SSALDMENFR                | 2 | 657.3175 | 3.465 | 0.352 |
| 128 | IPI00305461 | 1 | 35.2 | 0.74 | 0.12 | 141 | 71 | ITIH2 Inter-alpha-trypsin inhibitor heavy chain H2 precursor | n[145]TEVNVLPGAK[272]           | 2 | 658.3949 | 3.005 | 0.268 |
| 128 | IPI00305461 | 1 | 35.2 | 0.74 | 0.12 | 141 | 71 | ITIH2 Inter-alpha-trypsin inhibitor heavy chain H2 precursor | n[145]VQSTITSR                  | 2 | 518.2994 | 2.802 | 0.33  |
| 128 | IPI00305461 | 1 | 35.2 | 0.74 | 0.12 | 141 | 71 | ITIH2 Inter-alpha-trypsin inhibitor heavy chain H2 precursor | IYGNQDTSSQLKK                   | 3 | 634.6863 | 3.387 | 0.197 |
| 128 | IPI00305461 | 1 | 35.2 | 0.74 | 0.12 | 141 | 71 | ITIH2 Inter-alpha-trypsin inhibitor heavy chain H2 precursor | n[145]LSNENHGIAQR               | 3 | 461.5801 | 2.07  | 0.088 |
| 128 | IPI00305461 | 1 | 35.2 | 0.74 | 0.12 | 141 | 71 | ITIH2 Inter-alpha-trypsin inhibitor heavy chain H2 precursor | n[145]IYGNQDTSSQLK[272]K[272]   | 3 | 638.6934 | 3.489 | 0.251 |
| 128 | IPI00305461 | 1 | 35.2 | 0.74 | 0.12 | 141 | 71 | ITIH2 Inter-alpha-trypsin inhibitor heavy chain H2 precursor | IQPSGGTNINEALLR                 | 2 | 861.9785 | 3.024 | 0.35  |
| 128 | IPI00305461 | 1 | 35.2 | 0.74 | 0.12 | 141 | 71 | ITIH2 Inter-alpha-trypsin inhibitor heavy chain H2 precursor | VQFELHYQEVK                     | 2 | 850.462  | 3.859 | 0.292 |
| 128 | IPI00305461 | 1 | 35.2 | 0.74 | 0.12 | 141 | 71 | ITIH2 Inter-alpha-trypsin inhibitor heavy chain H2 precursor | n[145]SSALDM[147]ENFR           | 2 | 665.3149 | 1.799 | 0.102 |
| 128 | IPI00305461 | 1 | 35.2 | 0.74 | 0.12 | 141 | 71 | ITIH2 Inter-alpha-trypsin inhibitor heavy chain H2 precursor | DKHADPDFTR                      | 3 | 494.5881 | 2.293 | 0.294 |
| 128 | IPI00305461 | 1 | 35.2 | 0.74 | 0.12 | 141 | 71 | ITIH2 Inter-alpha-trypsin inhibitor heavy chain H2 precursor | n[145]VQFELHYQEVK[272]          | 2 | 854.4691 | 3.7   | 0.228 |
| 128 | IPI00305461 | 1 | 35.2 | 0.74 | 0.12 | 141 | 71 | ITIH2 Inter-alpha-trypsin inhibitor heavy chain H2 precursor | M[147]ATTMIQSK                  | 2 | 653.8466 | 2.733 | 0.288 |
| 128 | IPI00305461 | 1 | 35.2 | 0.74 | 0.12 | 141 | 71 | ITIH2 Inter-alpha-trypsin inhibitor heavy chain H2 precursor | n[145]JYLQPGR                   | 2 | 495.7963 | 2.136 | 0.126 |
| 128 | IPI00305461 | 1 | 35.2 | 0.74 | 0.12 | 141 | 71 | ITIH2 Inter-alpha-trypsin inhibitor heavy chain H2 precursor | n[145]ALYAQAR                   | 2 | 468.7728 | 2.169 | 0.127 |
| 128 | IPI00305461 | 1 | 35.2 | 0.74 | 0.12 | 141 | 71 | ITIH2 Inter-alpha-trypsin inhibitor heavy chain H2 precursor | M[147]ATTM[147]IQSK             | 2 | 661.844  | 2.446 | 0.287 |
| 128 | IPI00305461 | 1 | 35.2 | 0.74 | 0.12 | 141 | 71 | ITIH2 Inter-alpha-trypsin inhibitor heavy chain H2 precursor | n[145]LGSYEHR                   | 2 | 503.2654 | 2.095 | 0.069 |
| 128 | IPI00305461 | 1 | 35.2 | 0.74 | 0.12 | 141 | 71 | ITIH2 Inter-alpha-trypsin inhibitor heavy chain H2 precursor | n[145]DK[272]HADPDFTR           | 3 | 497.2595 | 2.557 | 0.194 |
| 128 | IPI00305461 | 1 | 35.2 | 0.74 | 0.12 | 141 | 71 | ITIH2 Inter-alpha-trypsin inhibitor heavy chain H2 precursor | SLAPTAAAK                       | 2 | 555.3375 | 3.043 | 0.141 |
| 128 | IPI00305461 | 1 | 35.2 | 0.74 | 0.12 | 141 | 71 | ITIH2 Inter-alpha-trypsin inhibitor heavy chain H2 precursor | n[145]SLAPTAAAK[272]            | 2 | 559.3446 | 2.918 | 0.149 |

|     |             |   |      |      |      |     |    |                                                              |                             |   |           |       |       |
|-----|-------------|---|------|------|------|-----|----|--------------------------------------------------------------|-----------------------------|---|-----------|-------|-------|
| 128 | IPI00305461 | 1 | 35.2 | 0.74 | 0.12 | 141 | 71 | ITIH2 Inter-alpha-trypsin inhibitor heavy chain H2 precursor | n[145]HADPDFTR              | 2 | 551.7735  | 2.059 | 0.254 |
| 128 | IPI00305461 | 1 | 35.2 | 0.74 | 0.12 | 141 | 71 | ITIH2 Inter-alpha-trypsin inhibitor heavy chain H2 precursor | n[145]FVHFFAPDNLDPK[272]    | 3 | 682.3748  | 4.459 | 0.255 |
| 128 | IPI00305461 | 1 | 35.2 | 0.74 | 0.12 | 141 | 71 | ITIH2 Inter-alpha-trypsin inhibitor heavy chain H2 precursor | n[145]IQPSGGTNINEALLR       | 3 | 576.3238  | 3.617 | 0.095 |
| 128 | IPI00305461 | 1 | 35.2 | 0.74 | 0.12 | 141 | 71 | ITIH2 Inter-alpha-trypsin inhibitor heavy chain H2 precursor | KFYNQVSTPLLR                | 2 | 873.5067  | 2.786 | 0.236 |
| 128 | IPI00305461 | 1 | 35.2 | 0.74 | 0.12 | 141 | 71 | ITIH2 Inter-alpha-trypsin inhibitor heavy chain H2 precursor | IYLPQGR                     | 1 | 986.5782  | 1.789 | 0.158 |
| 128 | IPI00305461 | 1 | 35.2 | 0.74 | 0.12 | 141 | 71 | ITIH2 Inter-alpha-trypsin inhibitor heavy chain H2 precursor | n[145]AHVSFK[272]PTVAQQR    | 3 | 586.3402  | 2.322 | 0.199 |
| 128 | IPI00305461 | 1 | 35.2 | 0.74 | 0.12 | 141 | 71 | ITIH2 Inter-alpha-trypsin inhibitor heavy chain H2 precursor | MLADAPPQDPSCCSGALYYGSK      | 3 | 882.7225  | 2.674 | 0.196 |
| 128 | IPI00305461 | 1 | 35.2 | 0.74 | 0.12 | 141 | 71 | ITIH2 Inter-alpha-trypsin inhibitor heavy chain H2 precursor | LGSEYHR                     | 1 | 1001.5164 | 1.896 | 0.122 |
| 128 | IPI00305461 | 1 | 35.2 | 0.74 | 0.12 | 141 | 71 | ITIH2 Inter-alpha-trypsin inhibitor heavy chain H2 precursor | n[145]NDLISATK[272]         | 2 | 575.3395  | 3.15  | 0.212 |
| 128 | IPI00305461 | 1 | 35.2 | 0.74 | 0.12 | 141 | 71 | ITIH2 Inter-alpha-trypsin inhibitor heavy chain H2 precursor | ALYAQAR                     | 1 | 932.5313  | 1.941 | 0.155 |
| 128 | IPI00305461 | 1 | 35.2 | 0.74 | 0.12 | 141 | 71 | ITIH2 Inter-alpha-trypsin inhibitor heavy chain H2 precursor | NDLISATK                    | 2 | 571.3324  | 1.603 | 0.095 |
| 128 | IPI00305461 | 1 | 35.2 | 0.74 | 0.12 | 141 | 71 | ITIH2 Inter-alpha-trypsin inhibitor heavy chain H2 precursor | FVHFFAPDNLDPK               | 3 | 679.7034  | 2.99  | 0.247 |
| 128 | IPI00305461 | 1 | 35.2 | 0.74 | 0.12 | 141 | 71 | ITIH2 Inter-alpha-trypsin inhibitor heavy chain H2 precursor | KLGSYHR                     | 2 | 635.3568  | 2.099 | 0.128 |
| 128 | IPI00305461 | 1 | 35.2 | 0.74 | 0.12 | 141 | 71 | ITIH2 Inter-alpha-trypsin inhibitor heavy chain H2 precursor | n[145]IYLPQGR               | 1 | 990.5853  | 1.759 | 0.123 |
| 128 | IPI00305461 | 1 | 35.2 | 0.74 | 0.12 | 141 | 71 | ITIH2 Inter-alpha-trypsin inhibitor heavy chain H2 precursor | NFHNYFGGSEIVVAGK            | 3 | 673.6864  | 3.533 | 0.265 |
| 128 | IPI00305461 | 1 | 35.2 | 0.74 | 0.12 | 141 | 71 | ITIH2 Inter-alpha-trypsin inhibitor heavy chain H2 precursor | n[145]ALYAQAR               | 1 | 936.5384  | 1.827 | 0.177 |
| 128 | IPI00305461 | 1 | 35.2 | 0.74 | 0.12 | 141 | 71 | ITIH2 Inter-alpha-trypsin inhibitor heavy chain H2 precursor | n[145]DK[272]HADPDFTR       | 2 | 745.3856  | 1.487 | 0.137 |
| 128 | IPI00305461 | 1 | 35.2 | 0.74 | 0.12 | 141 | 71 | ITIH2 Inter-alpha-trypsin inhibitor heavy chain H2 precursor | TILDDLRL                    | 1 | 985.5677  | 1.891 | 0.092 |
| 128 | IPI00305461 | 1 | 35.2 | 0.74 | 0.12 | 141 | 71 | ITIH2 Inter-alpha-trypsin inhibitor heavy chain H2 precursor | ALYAQAR                     | 2 | 466.7693  | 2.068 | 0.116 |
| 128 | IPI00305461 | 1 | 35.2 | 0.74 | 0.12 | 141 | 71 | ITIH2 Inter-alpha-trypsin inhibitor heavy chain H2 precursor | DKHADPDFTR                  | 2 | 741.3785  | 1.966 | 0.201 |
| 128 | IPI00305461 | 1 | 35.2 | 0.74 | 0.12 | 141 | 71 | ITIH2 Inter-alpha-trypsin inhibitor heavy chain H2 precursor | n[145]QTVEAM[147]K[272]     | 2 | 555.807   | 1.931 | 0.106 |
| 128 | IPI00305461 | 1 | 35.2 | 0.74 | 0.12 | 141 | 71 | ITIH2 Inter-alpha-trypsin inhibitor heavy chain H2 precursor | n[145]TILDDLRAEDHFSVIDFNQIR | 4 | 694.61    | 2.156 | 0.151 |
| 128 | IPI00305461 | 1 | 35.2 | 0.74 | 0.12 | 141 | 71 | ITIH2 Inter-alpha-trypsin inhibitor heavy chain H2 precursor | n[145]FLHVPDTFEGHFD         | 3 | 568.9428  | 2.684 | 0.249 |
| 128 | IPI00305461 | 1 | 35.2 | 0.74 | 0.12 | 141 | 71 | ITIH2 Inter-alpha-trypsin inhibitor heavy chain H2 precursor | n[145]NVQFNYPH              | 2 | 581.7917  | 2.13  | 0.355 |
| 128 | IPI00305461 | 1 | 35.2 | 0.74 | 0.12 | 141 | 71 | ITIH2 Inter-alpha-trypsin inhibitor heavy chain H2 precursor | n[145]LTINQLLAER            | 2 | 657.8967  | 3.229 | 0.206 |
| 128 | IPI00305461 | 1 | 35.2 | 0.74 | 0.12 | 141 | 71 | ITIH2 Inter-alpha-trypsin inhibitor heavy chain H2 precursor | DPDFTR                      | 2 | 445.722   | 1.821 | 0.22  |
| 128 | IPI00305461 | 1 | 35.2 | 0.74 | 0.12 | 141 | 71 | ITIH2 Inter-alpha-trypsin inhibitor heavy chain H2 precursor | n[145]DPDFTR                | 2 | 447.7255  | 1.924 | 0.186 |
| 128 | IPI00305461 | 1 | 35.2 | 0.74 | 0.12 | 141 | 71 | ITIH2 Inter-alpha-trypsin inhibitor heavy chain H2 precursor | n[145]DK[272]HADPDFTR       | 4 | 373.1964  | 1.493 | 0.118 |
| 128 | IPI00305461 | 1 | 35.2 | 0.74 | 0.12 | 141 | 71 | ITIH2 Inter-alpha-trypsin inhibitor heavy chain H2 precursor | n[145]LYAQAR                | 2 | 433.2543  | 1.99  | 0.021 |
| 128 | IPI00305461 | 1 | 35.2 | 0.74 | 0.12 | 141 | 71 | ITIH2 Inter-alpha-trypsin inhibitor heavy chain H2 precursor | n[145]PTVGELK[272]          | 2 | 516.3206  | 1.765 | 0.119 |
| 128 | IPI00305461 | 1 | 35.2 | 0.74 | 0.12 | 141 | 71 | ITIH2 Inter-alpha-trypsin inhibitor heavy chain H2 precursor | n[145]LGSEYHR               | 1 | 1005.5235 | 1.741 | 0.006 |
| 128 | IPI00305461 | 1 | 35.2 | 0.74 | 0.12 | 141 | 71 | ITIH2 Inter-alpha-trypsin inhibitor heavy chain H2 precursor | SVK[272]                    | 1 | 617.4104  | 0.88  | 0.378 |
| 128 | IPI00305461 | 1 | 35.2 | 0.74 | 0.12 | 141 | 71 | ITIH2 Inter-alpha-trypsin inhibitor heavy chain H2 precursor | n[145]DFLK[272]             | 1 | 810.4964  | 1.211 | 0.02  |
| 129 | IPI00328609 | 1 | 32.1 | 0.9  | 0.15 | 40  | 24 | SERPINA4 Kallistatin precursor                               | GDATVFFILPNQGK              | 2 | 893.9962  | 3.269 | 0.389 |
| 129 | IPI00328609 | 1 | 32.1 | 0.9  | 0.15 | 40  | 24 | SERPINA4 Kallistatin precursor                               | LGFTDLFSK                   | 2 | 654.3716  | 3.62  | 0.319 |
| 129 | IPI00328609 | 1 | 32.1 | 0.9  | 0.15 | 40  | 24 | SERPINA4 Kallistatin precursor                               | n[145]GDATVFFILPNQGK[272]   | 2 | 898.0033  | 2.963 | 0.381 |
| 129 | IPI00328609 | 1 | 32.1 | 0.9  | 0.15 | 40  | 24 | SERPINA4 Kallistatin precursor                               | IVDLVSELKK                  | 3 | 521.9993  | 3.734 | 0.407 |
| 129 | IPI00328609 | 1 | 32.1 | 0.9  | 0.15 | 40  | 24 | SERPINA4 Kallistatin precursor                               | n[145]IVDLVSELK[272]K[272]  | 3 | 526.0064  | 1.633 | 0.098 |
| 129 | IPI00328609 | 1 | 32.1 | 0.9  | 0.15 | 40  | 24 | SERPINA4 Kallistatin precursor                               | n[145]VGSALFLSHNLK[272]     | 3 | 525.315   | 4.151 | 0.355 |
| 129 | IPI00328609 | 1 | 32.1 | 0.9  | 0.15 | 40  | 24 | SERPINA4 Kallistatin precursor                               | n[145]GFQHLLHTLNLPGHGLETR   | 4 | 571.8163  | 3.335 | 0.328 |
| 129 | IPI00328609 | 1 | 32.1 | 0.9  | 0.15 | 40  | 24 | SERPINA4 Kallistatin precursor                               | FYYLIASETPGK                | 2 | 834.9535  | 3.779 | 0.395 |
| 129 | IPI00328609 | 1 | 32.1 | 0.9  | 0.15 | 40  | 24 | SERPINA4 Kallistatin precursor                               | VGSALFLSHNLK                | 2 | 783.4618  | 4.447 | 0.361 |
| 129 | IPI00328609 | 1 | 32.1 | 0.9  | 0.15 | 40  | 24 | SERPINA4 Kallistatin precursor                               | n[145]LGFTDLFSK[272]        | 2 | 658.3787  | 3.094 | 0.387 |
| 129 | IPI00328609 | 1 | 32.1 | 0.9  | 0.15 | 40  | 24 | SERPINA4 Kallistatin precursor                               | n[145]VGSALFLSHNLK[272]     | 2 | 787.4689  | 3.847 | 0.409 |
| 129 | IPI00328609 | 1 | 32.1 | 0.9  | 0.15 | 40  | 24 | SERPINA4 Kallistatin precursor                               | VGSALFLSHNLK                | 3 | 522.6436  | 3.718 | 0.203 |
| 129 | IPI00328609 | 1 | 32.1 | 0.9  | 0.15 | 40  | 24 | SERPINA4 Kallistatin precursor                               | n[145]FYYLIASETPGK[272]     | 2 | 838.9606  | 3.99  | 0.241 |
| 129 | IPI00328609 | 1 | 32.1 | 0.9  | 0.15 | 40  | 24 | SERPINA4 Kallistatin precursor                               | n[145]IAPANADFAFR           | 2 | 668.8602  | 3.072 | 0.339 |
| 129 | IPI00328609 | 1 | 32.1 | 0.9  | 0.15 | 40  | 24 | SERPINA4 Kallistatin precursor                               | n[145]WADLSGITK[272]        | 2 | 639.8685  | 2.91  | 0.252 |

|     |             |   |      |      |      |     |    |                                                 |                              |   |           |       |       |
|-----|-------------|---|------|------|------|-----|----|-------------------------------------------------|------------------------------|---|-----------|-------|-------|
| 129 | IPI00328609 | 1 | 32.1 | 0.9  | 0.15 | 40  | 24 | SERPINA4 Kallistatin precursor                  | IVDLVSELKK                   | 2 | 782.4953  | 3.426 | 0.173 |
| 129 | IPI00328609 | 1 | 32.1 | 0.9  | 0.15 | 40  | 24 | SERPINA4 Kallistatin precursor                  | n[145]GFQHLHLTLNLPGHGLETR    | 5 | 457.6545  | 3.237 | 0.208 |
| 129 | IPI00328609 | 1 | 32.1 | 0.9  | 0.15 | 40  | 24 | SERPINA4 Kallistatin precursor                  | n[145]DFYVDENTTVR            | 2 | 751.8658  | 2.69  | 0.248 |
| 129 | IPI00328609 | 1 | 32.1 | 0.9  | 0.15 | 40  | 24 | SERPINA4 Kallistatin precursor                  | n[145]IVDLVSELK[272]K[272]   | 2 | 788.506   | 2.302 | 0.26  |
| 129 | IPI00328609 | 1 | 32.1 | 0.9  | 0.15 | 40  | 24 | SERPINA4 Kallistatin precursor                  | IAPANADFAFR                  | 2 | 666.8566  | 2.321 | 0.221 |
| 129 | IPI00328609 | 1 | 32.1 | 0.9  | 0.15 | 40  | 24 | SERPINA4 Kallistatin precursor                  | n[145]YLPCSVLR               | 2 | 570.8049  | 2.18  | 0.108 |
| 129 | IPI00328609 | 1 | 32.1 | 0.9  | 0.15 | 40  | 24 | SERPINA4 Kallistatin precursor                  | VGSALFLSH                    | 2 | 535.8033  | 2.689 | 0.372 |
| 129 | IPI00328609 | 1 | 32.1 | 0.9  | 0.15 | 40  | 24 | SERPINA4 Kallistatin precursor                  | ALWEK[272]PFISSR             | 3 | 539.9793  | 2.316 | 0.128 |
| 129 | IPI00328609 | 1 | 32.1 | 0.9  | 0.15 | 40  | 24 | SERPINA4 Kallistatin precursor                  | n[145]VGSALFLSH              | 2 | 537.8069  | 2.389 | 0.117 |
| 129 | IPI00328609 | 1 | 32.1 | 0.9  | 0.15 | 40  | 24 | SERPINA4 Kallistatin precursor                  | LNDTMAVYEAK                  | 2 | 767.9004  | 2.108 | 0.091 |
| 130 | IPI00329775 | 1 | 22.5 | 0.83 | 0.04 | 23  | 14 | CPB2 Isoform 1 of Carboxypeptidase B2 precursor | n[145]FQSQQVLAALPR           | 2 | 715.9155  | 3.199 | 0.338 |
| 130 | IPI00329775 | 1 | 22.5 | 0.83 | 0.04 | 23  | 14 | CPB2 Isoform 1 of Carboxypeptidase B2 precursor | n[145]SFYANNHCIGTDLNR        | 3 | 638.9618  | 3.811 | 0.39  |
| 130 | IPI00329775 | 1 | 22.5 | 0.83 | 0.04 | 23  | 14 | CPB2 Isoform 1 of Carboxypeptidase B2 precursor | SKDHEELSLVASEAVR             | 3 | 684.0358  | 3.85  | 0.383 |
| 130 | IPI00329775 | 1 | 22.5 | 0.83 | 0.04 | 23  | 14 | CPB2 Isoform 1 of Carboxypeptidase B2 precursor | n[145]SK[272]DHEELSLVASEAVR  | 3 | 686.7072  | 3.462 | 0.358 |
| 130 | IPI00329775 | 1 | 22.5 | 0.83 | 0.04 | 23  | 14 | CPB2 Isoform 1 of Carboxypeptidase B2 precursor | n[145]EAFAAVSK[272]          | 2 | 555.8235  | 2.467 | 0.204 |
| 130 | IPI00329775 | 1 | 22.5 | 0.83 | 0.04 | 23  | 14 | CPB2 Isoform 1 of Carboxypeptidase B2 precursor | EAFAAVSK                     | 2 | 551.8164  | 2.303 | 0.225 |
| 130 | IPI00329775 | 1 | 22.5 | 0.83 | 0.04 | 23  | 14 | CPB2 Isoform 1 of Carboxypeptidase B2 precursor | n[145]IHIGSSFEEK[272]        | 3 | 435.9184  | 2.662 | 0.162 |
| 130 | IPI00329775 | 1 | 22.5 | 0.83 | 0.04 | 23  | 14 | CPB2 Isoform 1 of Carboxypeptidase B2 precursor | n[145]DTGTYGFLPER            | 2 | 756.8944  | 2.63  | 0.18  |
| 130 | IPI00329775 | 1 | 22.5 | 0.83 | 0.04 | 23  | 14 | CPB2 Isoform 1 of Carboxypeptidase B2 precursor | n[145]IHIGSSFEEK[272]        | 2 | 653.3739  | 2.741 | 0.126 |
| 130 | IPI00329775 | 1 | 22.5 | 0.83 | 0.04 | 23  | 14 | CPB2 Isoform 1 of Carboxypeptidase B2 precursor | HPDM[147]LTK                 | 3 | 379.8744  | 2.418 | 0.128 |
| 130 | IPI00329775 | 1 | 22.5 | 0.83 | 0.04 | 23  | 14 | CPB2 Isoform 1 of Carboxypeptidase B2 precursor | IHIGSSFEEK                   | 2 | 649.3668  | 2.676 | 0.075 |
| 130 | IPI00329775 | 1 | 22.5 | 0.83 | 0.04 | 23  | 14 | CPB2 Isoform 1 of Carboxypeptidase B2 precursor | n[145]YIK[272]PTCR           | 2 | 607.8351  | 1.941 | 0.125 |
| 130 | IPI00329775 | 1 | 22.5 | 0.83 | 0.04 | 23  | 14 | CPB2 Isoform 1 of Carboxypeptidase B2 precursor | YIKPTCR                      | 2 | 603.828   | 2.002 | 0.087 |
| 130 | IPI00329775 | 1 | 22.5 | 0.83 | 0.04 | 23  | 14 | CPB2 Isoform 1 of Carboxypeptidase B2 precursor | n[145]YIK[272]PTCR           | 3 | 405.5591  | 2.18  | 0.006 |
| 130 | IPI00329775 | 1 | 22.5 | 0.83 | 0.04 | 23  | 14 | CPB2 Isoform 1 of Carboxypeptidase B2 precursor | IVFPYSYTR                    | 2 | 643.3506  | 1.966 | 0.027 |
| 131 | IPI00386502 | 1 | 3.9  | 7.14 | 0    | 2   | 3  | BLZF1 Isoform 2 of Golgin-45                    | AM[147]EVK                   | 2 | 437.2468  | 1.996 | 0.156 |
| 131 | IPI00386502 | 1 | 3.9  | 7.14 | 0    | 2   | 3  | BLZF1 Isoform 2 of Golgin-45                    | AM[147]EVK[272]              | 2 | 439.2503  | 2.095 | 0.111 |
| 131 | IPI00386502 | 1 | 3.9  | 7.14 | 0    | 2   | 3  | BLZF1 Isoform 2 of Golgin-45                    | AM[147]EVK[272]              | 1 | 877.4934  | 1.755 | 0.105 |
| 132 | IPI00410714 | 1 | 33.1 | 4.26 | 0.35 | 6   | 6  | HBA2;HBA1 Hemoglobin subunit alpha              | VGAHAGEYGAALER               | 2 | 835.4183  | 3.652 | 0.519 |
| 132 | IPI00410714 | 1 | 33.1 | 4.26 | 0.35 | 6   | 6  | HBA2;HBA1 Hemoglobin subunit alpha              | n[145]TYFPHFDLSHGSAQVK[272]  | 3 | 708.0369  | 4.664 | 0.444 |
| 132 | IPI00410714 | 1 | 33.1 | 4.26 | 0.35 | 6   | 6  | HBA2;HBA1 Hemoglobin subunit alpha              | TYFPHFDLSHGSAQVK             | 4 | 529.2759  | 3.298 | 0.304 |
| 132 | IPI00410714 | 1 | 33.1 | 4.26 | 0.35 | 6   | 6  | HBA2;HBA1 Hemoglobin subunit alpha              | TYFPHFDLSHGSAQVK             | 3 | 705.3655  | 3.934 | 0.32  |
| 132 | IPI00410714 | 1 | 33.1 | 4.26 | 0.35 | 6   | 6  | HBA2;HBA1 Hemoglobin subunit alpha              | M[147]FLSFPTTK               | 2 | 684.3733  | 2.793 | 0.36  |
| 132 | IPI00410714 | 1 | 33.1 | 4.26 | 0.35 | 6   | 6  | HBA2;HBA1 Hemoglobin subunit alpha              | VLSPADK                      | 2 | 505.3057  | 1.882 | 0.178 |
| 133 | IPI00414283 | 1 | 28.5 | 2.07 | 0.59 | 145 | 86 | FN1 fibronectin 1 isoform 4 preproprotein       | AAHEEICTTNEGVM[147]YR        | 2 | 1013.445  | 4.249 | 0.543 |
| 133 | IPI00414283 | 1 | 28.5 | 2.07 | 0.59 | 145 | 86 | FN1 fibronectin 1 isoform 4 preproprotein       | DLQFVEVTDVK                  | 2 | 786.9353  | 4.335 | 0.397 |
| 133 | IPI00414283 | 1 | 28.5 | 2.07 | 0.59 | 145 | 86 | FN1 fibronectin 1 isoform 4 preproprotein       | EATIPGHLNSYTIK               | 2 | 912.5044  | 4.619 | 0.452 |
| 133 | IPI00414283 | 1 | 28.5 | 2.07 | 0.59 | 145 | 86 | FN1 fibronectin 1 isoform 4 preproprotein       | EESPLLIGQQSTVSDVPR           | 2 | 1048.0551 | 6.208 | 0.553 |
| 133 | IPI00414283 | 1 | 28.5 | 2.07 | 0.59 | 145 | 86 | FN1 fibronectin 1 isoform 4 preproprotein       | GATYNIIVEALK                 | 2 | 786.4615  | 4.644 | 0.398 |
| 133 | IPI00414283 | 1 | 28.5 | 2.07 | 0.59 | 145 | 86 | FN1 fibronectin 1 isoform 4 preproprotein       | HTSVQTTSSGSGPFTDVR           | 2 | 1002.4927 | 5.367 | 0.541 |
| 133 | IPI00414283 | 1 | 28.5 | 2.07 | 0.59 | 145 | 86 | FN1 fibronectin 1 isoform 4 preproprotein       | NLQPASEYTVSLVAIK             | 2 | 1007.0726 | 5.407 | 0.533 |
| 133 | IPI00414283 | 1 | 28.5 | 2.07 | 0.59 | 145 | 86 | FN1 fibronectin 1 isoform 4 preproprotein       | SSPVVIDASTAIDAPSNLR          | 2 | 1027.0499 | 4.513 | 0.553 |
| 133 | IPI00414283 | 1 | 28.5 | 2.07 | 0.59 | 145 | 86 | FN1 fibronectin 1 isoform 4 preproprotein       | SYTITGLQPGTDYK               | 2 | 912.4806  | 5.245 | 0.446 |
| 133 | IPI00414283 | 1 | 28.5 | 2.07 | 0.59 | 145 | 86 | FN1 fibronectin 1 isoform 4 preproprotein       | VPGTSTSATLTGLTR              | 2 | 801.4465  | 3.837 | 0.523 |
| 133 | IPI00414283 | 1 | 28.5 | 2.07 | 0.59 | 145 | 86 | FN1 fibronectin 1 isoform 4 preproprotein       | YSFCTDHTVLVQTR               | 2 | 928.4451  | 4.408 | 0.526 |
| 133 | IPI00414283 | 1 | 28.5 | 2.07 | 0.59 | 145 | 86 | FN1 fibronectin 1 isoform 4 preproprotein       | n[145]DLQFVEVTDVK[272]       | 2 | 790.9424  | 3.817 | 0.421 |
| 133 | IPI00414283 | 1 | 28.5 | 2.07 | 0.59 | 145 | 86 | FN1 fibronectin 1 isoform 4 preproprotein       | n[145]ESK[272]PLTAQQTTK[272] | 2 | 882.515   | 3.731 | 0.441 |
| 133 | IPI00414283 | 1 | 28.5 | 2.07 | 0.59 | 145 | 86 | FN1 fibronectin 1 isoform 4 preproprotein       | AAHEEICTTNEGVM[147]YR        | 3 | 675.9657  | 4.757 | 0.473 |

|     |             |   |      |      |      |     |    |                                           |                                     |   |           |       |       |
|-----|-------------|---|------|------|------|-----|----|-------------------------------------------|-------------------------------------|---|-----------|-------|-------|
| 133 | IPI00414283 | 1 | 28.5 | 2.07 | 0.59 | 145 | 86 | FN1 fibronectin 1 isoform 4 preproprotein | AAVYQPQHPQPPYGH                     | 3 | 675.3428  | 4.483 | 0.53  |
| 133 | IPI00414283 | 1 | 28.5 | 2.07 | 0.59 | 145 | 86 | FN1 fibronectin 1 isoform 4 preproprotein | CDPHEATCYDDGK                       | 3 | 609.2386  | 3.275 | 0.526 |
| 133 | IPI00414283 | 1 | 28.5 | 2.07 | 0.59 | 145 | 86 | FN1 fibronectin 1 isoform 4 preproprotein | CHEGGQSYK                           | 3 | 445.5375  | 3.466 | 0.455 |
| 133 | IPI00414283 | 1 | 28.5 | 2.07 | 0.59 | 145 | 86 | FN1 fibronectin 1 isoform 4 preproprotein | EATIPGHLNSYTIK                      | 3 | 608.672   | 3.73  | 0.46  |
| 133 | IPI00414283 | 1 | 28.5 | 2.07 | 0.59 | 145 | 86 | FN1 fibronectin 1 isoform 4 preproprotein | ESKPLTAQTTK                         | 3 | 584.672   | 1.419 | 0.031 |
| 133 | IPI00414283 | 1 | 28.5 | 2.07 | 0.59 | 145 | 86 | FN1 fibronectin 1 isoform 4 preproprotein | FGFCPM[147]AAHEEICTTNEGVM[147]YR    | 3 | 924.0469  | 5.538 | 0.644 |
| 133 | IPI00414283 | 1 | 28.5 | 2.07 | 0.59 | 145 | 86 | FN1 fibronectin 1 isoform 4 preproprotein | GDSPASSKPIISINR                     | 3 | 624.6707  | 3.871 | 0.432 |
| 133 | IPI00414283 | 1 | 28.5 | 2.07 | 0.59 | 145 | 86 | FN1 fibronectin 1 isoform 4 preproprotein | GLKPGVVYEGQLISIQYGHQEVTR            | 3 | 1027.2278 | 7.563 | 0.57  |
| 133 | IPI00414283 | 1 | 28.5 | 2.07 | 0.59 | 145 | 86 | FN1 fibronectin 1 isoform 4 preproprotein | HTSVQTTSSGSGPFTDVR                  | 3 | 668.6642  | 5.394 | 0.497 |
| 133 | IPI00414283 | 1 | 28.5 | 2.07 | 0.59 | 145 | 86 | FN1 fibronectin 1 isoform 4 preproprotein | NTFAEVTGLSPGVTTYFK                  | 3 | 758.7317  | 4.889 | 0.347 |
| 133 | IPI00414283 | 1 | 28.5 | 2.07 | 0.59 | 145 | 86 | FN1 fibronectin 1 isoform 4 preproprotein | RPGGEPSPGTTGQSYNQYSQR               | 3 | 846.0652  | 6.924 | 0.653 |
| 133 | IPI00414283 | 1 | 28.5 | 2.07 | 0.59 | 145 | 86 | FN1 fibronectin 1 isoform 4 preproprotein | VDVIPVNLPGEHGQR                     | 3 | 590.6601  | 3.558 | 0.359 |
| 133 | IPI00414283 | 1 | 28.5 | 2.07 | 0.59 | 145 | 86 | FN1 fibronectin 1 isoform 4 preproprotein | WCHDNGVNIYK                         | 3 | 521.2395  | 2.992 | 0.413 |
| 133 | IPI00414283 | 1 | 28.5 | 2.07 | 0.59 | 145 | 86 | FN1 fibronectin 1 isoform 4 preproprotein | n[145]EATIPGHLNSYTIK[272]           | 3 | 611.3434  | 3.799 | 0.275 |
| 133 | IPI00414283 | 1 | 28.5 | 2.07 | 0.59 | 145 | 86 | FN1 fibronectin 1 isoform 4 preproprotein | n[145]ESK[272]PLTAQTTK[272]         | 3 | 588.6791  | 2.848 | 0.287 |
| 133 | IPI00414283 | 1 | 28.5 | 2.07 | 0.59 | 145 | 86 | FN1 fibronectin 1 isoform 4 preproprotein | n[145]GFNCESK[272]PEAEETCFDK[272]   | 3 | 820.0302  | 4.247 | 0.517 |
| 133 | IPI00414283 | 1 | 28.5 | 2.07 | 0.59 | 145 | 86 | FN1 fibronectin 1 isoform 4 preproprotein | n[145]VGDTYERPK[272]                | 3 | 451.5853  | 3.701 | 0.335 |
| 133 | IPI00414283 | 1 | 28.5 | 2.07 | 0.59 | 145 | 86 | FN1 fibronectin 1 isoform 4 preproprotein | GLKPGVVYEGQLISIQYGHQEVTR            | 4 | 770.6727  | 5.478 | 0.469 |
| 133 | IPI00414283 | 1 | 28.5 | 2.07 | 0.59 | 145 | 86 | FN1 fibronectin 1 isoform 4 preproprotein | n[145]GLK[272]PGVVYEGQLISIQYGHQEVTR | 4 | 772.6762  | 6.638 | 0.482 |
| 133 | IPI00414283 | 1 | 28.5 | 2.07 | 0.59 | 145 | 86 | FN1 fibronectin 1 isoform 4 preproprotein | IYLYTLNDNAR                         | 2 | 748.3988  | 3.637 | 0.35  |
| 133 | IPI00414283 | 1 | 28.5 | 2.07 | 0.59 | 145 | 86 | FN1 fibronectin 1 isoform 4 preproprotein | DTLTSRPAQGVVTTLENVSPRR              | 3 | 826.7819  | 4.004 | 0.299 |
| 133 | IPI00414283 | 1 | 28.5 | 2.07 | 0.59 | 145 | 86 | FN1 fibronectin 1 isoform 4 preproprotein | GATYNIIVEALKDQQR                    | 3 | 700.3918  | 3.99  | 0.404 |
| 133 | IPI00414283 | 1 | 28.5 | 2.07 | 0.59 | 145 | 86 | FN1 fibronectin 1 isoform 4 preproprotein | LGVRPSQGGAPR                        | 3 | 488.6074  | 3.047 | 0.265 |
| 133 | IPI00414283 | 1 | 28.5 | 2.07 | 0.59 | 145 | 86 | FN1 fibronectin 1 isoform 4 preproprotein | TEIDKPSQM[147]QVTDVQDNSISVK         | 3 | 961.5025  | 5.157 | 0.304 |
| 133 | IPI00414283 | 1 | 28.5 | 2.07 | 0.59 | 145 | 86 | FN1 fibronectin 1 isoform 4 preproprotein | TEIDKPSQM[147]QVTDVQDNSISVK         | 3 | 966.8341  | 3.321 | 0.315 |
| 133 | IPI00414283 | 1 | 28.5 | 2.07 | 0.59 | 145 | 86 | FN1 fibronectin 1 isoform 4 preproprotein | VGDTYERPK                           | 3 | 448.9139  | 3.126 | 0.264 |
| 133 | IPI00414283 | 1 | 28.5 | 2.07 | 0.59 | 145 | 86 | FN1 fibronectin 1 isoform 4 preproprotein | YSFCTDHTVLVQTR                      | 3 | 619.2992  | 2.082 | 0.29  |
| 133 | IPI00414283 | 1 | 28.5 | 2.07 | 0.59 | 145 | 86 | FN1 fibronectin 1 isoform 4 preproprotein | n[145]NTFAEVTGLSPGVTTYFK[272]       | 3 | 761.4031  | 3.81  | 0.26  |
| 133 | IPI00414283 | 1 | 28.5 | 2.07 | 0.59 | 145 | 86 | FN1 fibronectin 1 isoform 4 preproprotein | YQCICYGR                            | 2 | 644.2425  | 2.719 | 0.44  |
| 133 | IPI00414283 | 1 | 28.5 | 2.07 | 0.59 | 145 | 86 | FN1 fibronectin 1 isoform 4 preproprotein | n[145]GATYNIIVEALK[272]             | 2 | 790.4686  | 4.168 | 0.361 |
| 133 | IPI00414283 | 1 | 28.5 | 2.07 | 0.59 | 145 | 86 | FN1 fibronectin 1 isoform 4 preproprotein | TYHVGEQWQK[272]                     | 3 | 520.6078  | 3.672 | 0.325 |
| 133 | IPI00414283 | 1 | 28.5 | 2.07 | 0.59 | 145 | 86 | FN1 fibronectin 1 isoform 4 preproprotein | FTNIGPDTMR                          | 2 | 646.3268  | 3.279 | 0.301 |
| 133 | IPI00414283 | 1 | 28.5 | 2.07 | 0.59 | 145 | 86 | FN1 fibronectin 1 isoform 4 preproprotein | LGVRPSQGGAPR                        | 2 | 732.4075  | 2.996 | 0.404 |
| 133 | IPI00414283 | 1 | 28.5 | 2.07 | 0.59 | 145 | 86 | FN1 fibronectin 1 isoform 4 preproprotein | STTPDITGYR                          | 2 | 625.8224  | 2.972 | 0.404 |
| 133 | IPI00414283 | 1 | 28.5 | 2.07 | 0.59 | 145 | 86 | FN1 fibronectin 1 isoform 4 preproprotein | TFYSCTTEGR                          | 2 | 675.7945  | 2.586 | 0.445 |
| 133 | IPI00414283 | 1 | 28.5 | 2.07 | 0.59 | 145 | 86 | FN1 fibronectin 1 isoform 4 preproprotein | VDVIPVNLPGEHGQR                     | 2 | 885.4865  | 3.693 | 0.389 |
| 133 | IPI00414283 | 1 | 28.5 | 2.07 | 0.59 | 145 | 86 | FN1 fibronectin 1 isoform 4 preproprotein | YEVSVYALK                           | 2 | 676.3847  | 2.987 | 0.333 |
| 133 | IPI00414283 | 1 | 28.5 | 2.07 | 0.59 | 145 | 86 | FN1 fibronectin 1 isoform 4 preproprotein | CHEGGQSYK                           | 2 | 667.8027  | 2.822 | 0.381 |
| 133 | IPI00414283 | 1 | 28.5 | 2.07 | 0.59 | 145 | 86 | FN1 fibronectin 1 isoform 4 preproprotein | FTNIGPDTM[147]R                     | 2 | 654.3243  | 2.025 | 0.012 |
| 133 | IPI00414283 | 1 | 28.5 | 2.07 | 0.59 | 145 | 86 | FN1 fibronectin 1 isoform 4 preproprotein | VGDTYERPK                           | 2 | 672.8672  | 2.957 | 0.289 |
| 133 | IPI00414283 | 1 | 28.5 | 2.07 | 0.59 | 145 | 86 | FN1 fibronectin 1 isoform 4 preproprotein | VFAVSHGR                            | 2 | 506.788   | 2.684 | 0.225 |
| 133 | IPI00414283 | 1 | 28.5 | 2.07 | 0.59 | 145 | 86 | FN1 fibronectin 1 isoform 4 preproprotein | n[145]VGDTYERPK[272]                | 2 | 676.8743  | 2.496 | 0.256 |
| 133 | IPI00414283 | 1 | 28.5 | 2.07 | 0.59 | 145 | 86 | FN1 fibronectin 1 isoform 4 preproprotein | GFNCESKPEAEETCFDK                   | 3 | 816.0231  | 2.469 | 0.334 |
| 133 | IPI00414283 | 1 | 28.5 | 2.07 | 0.59 | 145 | 86 | FN1 fibronectin 1 isoform 4 preproprotein | DAPIVVK                             | 2 | 518.8112  | 2.456 | 0.241 |
| 133 | IPI00414283 | 1 | 28.5 | 2.07 | 0.59 | 145 | 86 | FN1 fibronectin 1 isoform 4 preproprotein | n[145]YEK[272]PGSPRR                | 2 | 659.8715  | 2.53  | 0.262 |
| 133 | IPI00414283 | 1 | 28.5 | 2.07 | 0.59 | 145 | 86 | FN1 fibronectin 1 isoform 4 preproprotein | AQITGYR                             | 2 | 474.7667  | 2.78  | 0.109 |
| 133 | IPI00414283 | 1 | 28.5 | 2.07 | 0.59 | 145 | 86 | FN1 fibronectin 1 isoform 4 preproprotein | ISCTIANR                            | 2 | 532.273   | 2.371 | 0.204 |
| 133 | IPI00414283 | 1 | 28.5 | 2.07 | 0.59 | 145 | 86 | FN1 fibronectin 1 isoform 4 preproprotein | VTTTPK                              | 2 | 463.7871  | 1.887 | 0.256 |

|     |             |   |      |      |      |     |    |                                           |                            |   |           |       |       |
|-----|-------------|---|------|------|------|-----|----|-------------------------------------------|----------------------------|---|-----------|-------|-------|
| 133 | IPI00414283 | 1 | 28.5 | 2.07 | 0.59 | 145 | 86 | FN1 fibronectin 1 isoform 4 preproprotein | n[145]ITGYIHK[272]         | 2 | 548.3545  | 2.603 | 0.139 |
| 133 | IPI00414283 | 1 | 28.5 | 2.07 | 0.59 | 145 | 86 | FN1 fibronectin 1 isoform 4 preproprotein | AQITGYR                    | 1 | 948.5262  | 1.879 | 0.158 |
| 133 | IPI00414283 | 1 | 28.5 | 2.07 | 0.59 | 145 | 86 | FN1 fibronectin 1 isoform 4 preproprotein | YTGNTYR                    | 2 | 507.7538  | 2.094 | 0.198 |
| 133 | IPI00414283 | 1 | 28.5 | 2.07 | 0.59 | 145 | 86 | FN1 fibronectin 1 isoform 4 preproprotein | TYHVGEQWQK                 | 3 | 519.2721  | 3.303 | 0.089 |
| 133 | IPI00414283 | 1 | 28.5 | 2.07 | 0.59 | 145 | 86 | FN1 fibronectin 1 isoform 4 preproprotein | n[145]WLPSSSPVTGYR         | 2 | 747.3971  | 3.24  | 0.289 |
| 133 | IPI00414283 | 1 | 28.5 | 2.07 | 0.59 | 145 | 86 | FN1 fibronectin 1 isoform 4 preproprotein | ESKPLTAQQTTK               | 2 | 876.5044  | 1.284 | 0.052 |
| 133 | IPI00414283 | 1 | 28.5 | 2.07 | 0.59 | 145 | 86 | FN1 fibronectin 1 isoform 4 preproprotein | YEKPGSPPR                  | 2 | 655.8644  | 2.521 | 0.184 |
| 133 | IPI00414283 | 1 | 28.5 | 2.07 | 0.59 | 145 | 86 | FN1 fibronectin 1 isoform 4 preproprotein | ATITGYR                    | 2 | 461.2613  | 2.782 | 0.315 |
| 133 | IPI00414283 | 1 | 28.5 | 2.07 | 0.59 | 145 | 86 | FN1 fibronectin 1 isoform 4 preproprotein | YVHGV                      | 2 | 435.7509  | 2.204 | 0.09  |
| 133 | IPI00414283 | 1 | 28.5 | 2.07 | 0.59 | 145 | 86 | FN1 fibronectin 1 isoform 4 preproprotein | ITGYIHK                    | 2 | 544.3474  | 2.261 | 0.127 |
| 133 | IPI00414283 | 1 | 28.5 | 2.07 | 0.59 | 145 | 86 | FN1 fibronectin 1 isoform 4 preproprotein | n[145]DAPIVNK[272]         | 2 | 522.8183  | 2.188 | 0.103 |
| 133 | IPI00414283 | 1 | 28.5 | 2.07 | 0.59 | 145 | 86 | FN1 fibronectin 1 isoform 4 preproprotein | VTWAPPSIDLTNFLVR           | 3 | 689.386   | 2.379 | 0.182 |
| 133 | IPI00414283 | 1 | 28.5 | 2.07 | 0.59 | 145 | 86 | FN1 fibronectin 1 isoform 4 preproprotein | SDTVSPSR                   | 2 | 499.7669  | 1.754 | 0.001 |
| 133 | IPI00414283 | 1 | 28.5 | 2.07 | 0.59 | 145 | 86 | FN1 fibronectin 1 isoform 4 preproprotein | IGDQWDK                    | 2 | 571.3037  | 1.948 | 0.097 |
| 133 | IPI00414283 | 1 | 28.5 | 2.07 | 0.59 | 145 | 86 | FN1 fibronectin 1 isoform 4 preproprotein | TYHVGEQWQK[272]            | 2 | 780.408   | 2.942 | 0.268 |
| 133 | IPI00414283 | 1 | 28.5 | 2.07 | 0.59 | 145 | 86 | FN1 fibronectin 1 isoform 4 preproprotein | YLRL                       | 2 | 352.7263  | 1.622 | 0.012 |
| 133 | IPI00414283 | 1 | 28.5 | 2.07 | 0.59 | 145 | 86 | FN1 fibronectin 1 isoform 4 preproprotein | ALVCTCYGGSR                | 2 | 681.2953  | 2.418 | 0.367 |
| 133 | IPI00414283 | 1 | 28.5 | 2.07 | 0.59 | 145 | 86 | FN1 fibronectin 1 isoform 4 preproprotein | TIKPDVR                    | 2 | 554.8455  | 1.495 | 0.064 |
| 133 | IPI00414283 | 1 | 28.5 | 2.07 | 0.59 | 145 | 86 | FN1 fibronectin 1 isoform 4 preproprotein | n[145]IGDQWDK[272]         | 2 | 575.3108  | 1.785 | 0.009 |
| 133 | IPI00414283 | 1 | 28.5 | 2.07 | 0.59 | 145 | 86 | FN1 fibronectin 1 isoform 4 preproprotein | IGDTWSK                    | 2 | 543.8008  | 1.646 | 0.01  |
| 133 | IPI00414283 | 1 | 28.5 | 2.07 | 0.59 | 145 | 86 | FN1 fibronectin 1 isoform 4 preproprotein | EATIPGHLNSY                | 2 | 671.3435  | 2.706 | 0.283 |
| 133 | IPI00414283 | 1 | 28.5 | 2.07 | 0.59 | 145 | 86 | FN1 fibronectin 1 isoform 4 preproprotein | ITCTSR                     | 2 | 433.7148  | 1.323 | 0.039 |
| 133 | IPI00414283 | 1 | 28.5 | 2.07 | 0.59 | 145 | 86 | FN1 fibronectin 1 isoform 4 preproprotein | PQAPITGYR                  | 2 | 571.8195  | 2.666 | 0.201 |
| 133 | IPI00414283 | 1 | 28.5 | 2.07 | 0.59 | 145 | 86 | FN1 fibronectin 1 isoform 4 preproprotein | GGNSNGALCHFPF              | 2 | 753.8345  | 2.146 | 0.363 |
| 133 | IPI00414283 | 1 | 28.5 | 2.07 | 0.59 | 145 | 86 | FN1 fibronectin 1 isoform 4 preproprotein | VTPKEK                     | 2 | 561.3557  | 1.815 | 0.078 |
| 133 | IPI00414283 | 1 | 28.5 | 2.07 | 0.59 | 145 | 86 | FN1 fibronectin 1 isoform 4 preproprotein | n[145]WLPSSSPVTGYR         | 3 | 498.6005  | 2.09  | 0     |
| 133 | IPI00414283 | 1 | 28.5 | 2.07 | 0.59 | 145 | 86 | FN1 fibronectin 1 isoform 4 preproprotein | SK[272]K[272]              | 2 | 395.7731  | 0.913 | 0.136 |
| 133 | IPI00414283 | 1 | 28.5 | 2.07 | 0.59 | 145 | 86 | FN1 fibronectin 1 isoform 4 preproprotein | SVK[272]                   | 1 | 617.4104  | 0.88  | 0.378 |
| 134 | IPI00465436 | 1 | 8.3  | 1.13 | 0.01 | 4   | 4  | CAT Catalase                              | DPILFPSFIHSQK              | 3 | 603.6735  | 4.112 | 0.311 |
| 134 | IPI00465436 | 1 | 8.3  | 1.13 | 0.01 | 4   | 4  | CAT Catalase                              | n[145]DPILFPSFIHSQK[272]   | 3 | 606.3449  | 3.277 | 0.281 |
| 134 | IPI00465436 | 1 | 8.3  | 1.13 | 0.01 | 4   | 4  | CAT Catalase                              | GAGAFGYFEVTHDITK           | 3 | 665.0108  | 2.991 | 0.257 |
| 134 | IPI00465436 | 1 | 8.3  | 1.13 | 0.01 | 4   | 4  | CAT Catalase                              | LGPNYLHIPVNCYPYR           | 3 | 647.999   | 2.079 | 0.018 |
| 135 | IPI00477090 | 1 | 15.7 | 0.79 | 0.09 | 25  | 13 | IGHM IGHM protein                         | n[145]YVTSAPM[147]PEPQAPGR | 2 | 880.9415  | 3.551 | 0.496 |
| 135 | IPI00477090 | 1 | 15.7 | 0.79 | 0.09 | 25  | 13 | IGHM IGHM protein                         | n[145]GVALHRPDVYLLPPAR     | 3 | 640.043   | 4.03  | 0.43  |
| 135 | IPI00477090 | 1 | 15.7 | 0.79 | 0.09 | 25  | 13 | IGHM IGHM protein                         | DVMQGTDEHVVCK              | 3 | 596.281   | 2.813 | 0.42  |
| 135 | IPI00477090 | 1 | 15.7 | 0.79 | 0.09 | 25  | 13 | IGHM IGHM protein                         | n[145]LICQATGFSPR          | 2 | 691.8557  | 3.36  | 0.354 |
| 135 | IPI00477090 | 1 | 15.7 | 0.79 | 0.09 | 25  | 13 | IGHM IGHM protein                         | n[145]VSVFVPPR             | 2 | 522.8198  | 2.287 | 0.346 |
| 135 | IPI00477090 | 1 | 15.7 | 0.79 | 0.09 | 25  | 13 | IGHM IGHM protein                         | GVALHRPDVYLLPPAR           | 3 | 638.7073  | 3.419 | 0.384 |
| 135 | IPI00477090 | 1 | 15.7 | 0.79 | 0.09 | 25  | 13 | IGHM IGHM protein                         | n[145]GQPLSPEK[272]        | 2 | 572.3343  | 2.632 | 0.271 |
| 135 | IPI00477090 | 1 | 15.7 | 0.79 | 0.09 | 25  | 13 | IGHM IGHM protein                         | n[145]DGFFGNPR             | 2 | 527.2654  | 1.942 | 0.159 |
| 135 | IPI00477090 | 1 | 15.7 | 0.79 | 0.09 | 25  | 13 | IGHM IGHM protein                         | GQPLSPEK                   | 2 | 568.3272  | 2.526 | 0.287 |
| 135 | IPI00477090 | 1 | 15.7 | 0.79 | 0.09 | 25  | 13 | IGHM IGHM protein                         | DGFFGNPR                   | 2 | 525.2618  | 2.152 | 0.04  |
| 135 | IPI00477090 | 1 | 15.7 | 0.79 | 0.09 | 25  | 13 | IGHM IGHM protein                         | n[145]GFPSVLR              | 2 | 460.2777  | 2.301 | 0.171 |
| 135 | IPI00477090 | 1 | 15.7 | 0.79 | 0.09 | 25  | 13 | IGHM IGHM protein                         | ESGPTTYK                   | 2 | 581.8088  | 1.866 | 0.142 |
| 135 | IPI00477090 | 1 | 15.7 | 0.79 | 0.09 | 25  | 13 | IGHM IGHM protein                         | n[145]DVMQGTDEHVVCK[272]   | 3 | 598.9524  | 2.486 | 0.141 |
| 135 | IPI00477090 | 1 | 15.7 | 0.79 | 0.09 | 25  | 13 | IGHM IGHM protein                         | n[145]ESGPTTYK[272]        | 2 | 585.8159  | 2.021 | 0.112 |
| 136 | IPI00477992 | 1 | 28.6 | 0.8  | 0.04 | 19  | 16 | C1QB complement component 1               | FDHVITNM[147]NNNYEPR       | 2 | 1010.4707 | 4.395 | 0.502 |
| 136 | IPI00477992 | 1 | 28.6 | 0.8  | 0.04 | 19  | 16 | C1QB complement component 1               | n[145]FDHVITNMNNNYEPR      | 2 | 1004.4768 | 4.294 | 0.553 |



|     |             |   |      |      |      |     |    |                                     |                            |   |           |       |       |
|-----|-------------|---|------|------|------|-----|----|-------------------------------------|----------------------------|---|-----------|-------|-------|
| 136 | IPI00477992 | 1 | 28.6 | 0.8  | 0.04 | 19  | 16 | C1QB complement component 1         | n[145]FDHVITNM[147]NNNYEPR | 2 | 1012.4743 | 4.576 | 0.511 |
| 136 | IPI00477992 | 1 | 28.6 | 0.8  | 0.04 | 19  | 16 | C1QB complement component 1         | n[145]GLYFYFTHASSR         | 2 | 804.9     | 3.853 | 0.544 |
| 136 | IPI00477992 | 1 | 28.6 | 0.8  | 0.04 | 19  | 16 | C1QB complement component 1         | n[145]LEQGENVFLQATDK[272]  | 2 | 940.5039  | 6.008 | 0.416 |
| 136 | IPI00477992 | 1 | 28.6 | 0.8  | 0.04 | 19  | 16 | C1QB complement component 1         | n[145]FDHVITNMNNNYEPR      | 3 | 669.987   | 3.999 | 0.469 |
| 136 | IPI00477992 | 1 | 28.6 | 0.8  | 0.04 | 19  | 16 | C1QB complement component 1         | n[145]FDHVITNM[147]NNNYEPR | 3 | 675.3186  | 4.509 | 0.311 |
| 136 | IPI00477992 | 1 | 28.6 | 0.8  | 0.04 | 19  | 16 | C1QB complement component 1         | n[145]GLYFYFTHASSR         | 3 | 536.9358  | 3.663 | 0.505 |
| 136 | IPI00477992 | 1 | 28.6 | 0.8  | 0.04 | 19  | 16 | C1QB complement component 1         | n[145]VPGLYFYFTHASSR       | 3 | 602.3095  | 4.235 | 0.492 |
| 136 | IPI00477992 | 1 | 28.6 | 0.8  | 0.04 | 19  | 16 | C1QB complement component 1         | LEQGENVFLQATDK             | 2 | 936.4968  | 4.155 | 0.409 |
| 136 | IPI00477992 | 1 | 28.6 | 0.8  | 0.04 | 19  | 16 | C1QB complement component 1         | n[145]GNLCVNLN[147]R       | 2 | 613.3022  | 2.713 | 0.194 |
| 136 | IPI00477992 | 1 | 28.6 | 0.8  | 0.04 | 19  | 16 | C1QB complement component 1         | n[145]IAFSATR              | 2 | 455.2674  | 2.084 | 0.148 |
| 136 | IPI00477992 | 1 | 28.6 | 0.8  | 0.04 | 19  | 16 | C1QB complement component 1         | n[145]TINVPLR              | 2 | 478.8041  | 2.295 | 0.098 |
| 136 | IPI00477992 | 1 | 28.6 | 0.8  | 0.04 | 19  | 16 | C1QB complement component 1         | n[145]VPGLYFYFTH           | 2 | 702.3595  | 3.448 | 0.389 |
| 136 | IPI00477992 | 1 | 28.6 | 0.8  | 0.04 | 19  | 16 | C1QB complement component 1         | n[145]LEQGENVFLQATDK       | 2 | 938.5003  | 2.936 | 0.118 |
| 136 | IPI00477992 | 1 | 28.6 | 0.8  | 0.04 | 19  | 16 | C1QB complement component 1         | VPGLYFYFTH                 | 2 | 700.3559  | 2.311 | 0.247 |
| 137 | IPI00478003 | 1 | 74.1 | 0.77 | 0.13 | 851 | ## | A2M Alpha-2-macroglobulin precursor | AIGYLNTGYQR                | 1 | 1395.738  | 3.001 | 0.369 |
| 137 | IPI00478003 | 1 | 74.1 | 0.77 | 0.13 | 851 | ## | A2M Alpha-2-macroglobulin precursor | AAQVTIQSSGTFSSK            | 2 | 896.4836  | 5.386 | 0.519 |
| 137 | IPI00478003 | 1 | 74.1 | 0.77 | 0.13 | 851 | ## | A2M Alpha-2-macroglobulin precursor | AFALAGNQDK                 | 2 | 657.8619  | 3.909 | 0.394 |
| 137 | IPI00478003 | 1 | 74.1 | 0.77 | 0.13 | 851 | ## | A2M Alpha-2-macroglobulin precursor | AIGYLNTGYQR                | 2 | 698.3726  | 3.725 | 0.438 |
| 137 | IPI00478003 | 1 | 74.1 | 0.77 | 0.13 | 851 | ## | A2M Alpha-2-macroglobulin precursor | AVLPTGDVIGDSAK             | 2 | 811.9593  | 4.454 | 0.485 |
| 137 | IPI00478003 | 1 | 74.1 | 0.77 | 0.13 | 851 | ## | A2M Alpha-2-macroglobulin precursor | DMYSFLEDMGLK               | 2 | 864.9204  | 5.256 | 0.382 |
| 137 | IPI00478003 | 1 | 74.1 | 0.77 | 0.13 | 851 | ## | A2M Alpha-2-macroglobulin precursor | DM[147]YSFLEDMGLK          | 2 | 872.9179  | 4.565 | 0.4   |
| 137 | IPI00478003 | 1 | 74.1 | 0.77 | 0.13 | 851 | ## | A2M Alpha-2-macroglobulin precursor | DM[147]YSFLEDM[147]GLK     | 2 | 880.9154  | 3.463 | 0.551 |
| 137 | IPI00478003 | 1 | 74.1 | 0.77 | 0.13 | 851 | ## | A2M Alpha-2-macroglobulin precursor | DTVIKPLLVEPEGLEK           | 2 | 1100.6513 | 4.275 | 0.475 |
| 137 | IPI00478003 | 1 | 74.1 | 0.77 | 0.13 | 851 | ## | A2M Alpha-2-macroglobulin precursor | ETTFNSLLCPSGGEVSEELSLK     | 2 | 1333.6563 | 4.998 | 0.488 |
| 137 | IPI00478003 | 1 | 74.1 | 0.77 | 0.13 | 851 | ## | A2M Alpha-2-macroglobulin precursor | GITYTPVSSTNEK              | 2 | 838.9464  | 4.743 | 0.469 |
| 137 | IPI00478003 | 1 | 74.1 | 0.77 | 0.13 | 851 | ## | A2M Alpha-2-macroglobulin precursor | LLLQQVSLPELPEYSMK          | 2 | 1163.148  | 4.293 | 0.521 |
| 137 | IPI00478003 | 1 | 74.1 | 0.77 | 0.13 | 851 | ## | A2M Alpha-2-macroglobulin precursor | LLLQQVSLPELPEYSM[147]K     | 2 | 1171.1455 | 4.607 | 0.503 |
| 137 | IPI00478003 | 1 | 74.1 | 0.77 | 0.13 | 851 | ## | A2M Alpha-2-macroglobulin precursor | LLIYAVLPTGDVIGDSAK         | 2 | 1063.117  | 5.551 | 0.563 |
| 137 | IPI00478003 | 1 | 74.1 | 0.77 | 0.13 | 851 | ## | A2M Alpha-2-macroglobulin precursor | LTAQPAPTSEDLTSATNIVK       | 2 | 1169.1367 | 6.299 | 0.542 |
| 137 | IPI00478003 | 1 | 74.1 | 0.77 | 0.13 | 851 | ## | A2M Alpha-2-macroglobulin precursor | LHVVEEPTETVR               | 2 | 843.4521  | 4.393 | 0.403 |
| 137 | IPI00478003 | 1 | 74.1 | 0.77 | 0.13 | 851 | ## | A2M Alpha-2-macroglobulin precursor | M[147]VSGFIPLKPTVK         | 2 | 927.0578  | 2.248 | 0.234 |
| 137 | IPI00478003 | 1 | 74.1 | 0.77 | 0.13 | 851 | ## | A2M Alpha-2-macroglobulin precursor | NALFCLESAWK                | 2 | 804.4073  | 3.765 | 0.425 |
| 137 | IPI00478003 | 1 | 74.1 | 0.77 | 0.13 | 851 | ## | A2M Alpha-2-macroglobulin precursor | NALFCLESAWK[272]           | 2 | 806.4108  | 3.733 | 0.329 |
| 137 | IPI00478003 | 1 | 74.1 | 0.77 | 0.13 | 851 | ## | A2M Alpha-2-macroglobulin precursor | QFSFPLSSEPFQGSYK           | 2 | 1065.0388 | 4.921 | 0.517 |
| 137 | IPI00478003 | 1 | 74.1 | 0.77 | 0.13 | 851 | ## | A2M Alpha-2-macroglobulin precursor | SLFFTVLQDVPVR              | 2 | 830.9747  | 4.032 | 0.488 |
| 137 | IPI00478003 | 1 | 74.1 | 0.77 | 0.13 | 851 | ## | A2M Alpha-2-macroglobulin precursor | SSSNEEVMFLTVQVK            | 2 | 989.5194  | 4.364 | 0.522 |
| 137 | IPI00478003 | 1 | 74.1 | 0.77 | 0.13 | 851 | ## | A2M Alpha-2-macroglobulin precursor | SSSNEEVM[147]FLTVQVK       | 2 | 997.5168  | 5.598 | 0.522 |
| 137 | IPI00478003 | 1 | 74.1 | 0.77 | 0.13 | 851 | ## | A2M Alpha-2-macroglobulin precursor | SSTQDTVVALHALSK            | 2 | 919.0126  | 5.939 | 0.543 |
| 137 | IPI00478003 | 1 | 74.1 | 0.77 | 0.13 | 851 | ## | A2M Alpha-2-macroglobulin precursor | TAQEGDHGSHVYTK             | 2 | 905.4476  | 2.102 | 0.276 |
| 137 | IPI00478003 | 1 | 74.1 | 0.77 | 0.13 | 851 | ## | A2M Alpha-2-macroglobulin precursor | TEHPFTVEEFVLPK             | 2 | 977.0277  | 4.865 | 0.505 |
| 137 | IPI00478003 | 1 | 74.1 | 0.77 | 0.13 | 851 | ## | A2M Alpha-2-macroglobulin precursor | TEVSSNHVLIYLDK             | 2 | 949.5228  | 5.754 | 0.539 |
| 137 | IPI00478003 | 1 | 74.1 | 0.77 | 0.13 | 851 | ## | A2M Alpha-2-macroglobulin precursor | VDLSFSPSQSLPASHAH          | 2 | 960.4842  | 5.456 | 0.559 |
| 137 | IPI00478003 | 1 | 74.1 | 0.77 | 0.13 | 851 | ## | A2M Alpha-2-macroglobulin precursor | VSVQLEASPAFLAVPVEK         | 2 | 1082.6225 | 6.697 | 0.526 |
| 137 | IPI00478003 | 1 | 74.1 | 0.77 | 0.13 | 851 | ## | A2M Alpha-2-macroglobulin precursor | VTGEGCVYLQTSLK             | 2 | 912.4734  | 5.139 | 0.44  |
| 137 | IPI00478003 | 1 | 74.1 | 0.77 | 0.13 | 851 | ## | A2M Alpha-2-macroglobulin precursor | VYDYYETDEFAIAEYNAPCSK      | 2 | 1409.1248 | 5.953 | 0.618 |
| 137 | IPI00478003 | 1 | 74.1 | 0.77 | 0.13 | 851 | ## | A2M Alpha-2-macroglobulin precursor | YDVENCLANK                 | 2 | 747.8576  | 4.475 | 0.358 |
| 137 | IPI00478003 | 1 | 74.1 | 0.77 | 0.13 | 851 | ## | A2M Alpha-2-macroglobulin precursor | YILNGGTLLGLK               | 2 | 771.4744  | 4.545 | 0.439 |
| 137 | IPI00478003 | 1 | 74.1 | 0.77 | 0.13 | 851 | ## | A2M Alpha-2-macroglobulin precursor | YSDASDCHGEDSQAFCEK         | 2 | 1182.4554 | 4.985 | 0.641 |

|     |             |   |      |      |      |     |    |                                     |                                    |   |           |       |       |
|-----|-------------|---|------|------|------|-----|----|-------------------------------------|------------------------------------|---|-----------|-------|-------|
| 137 | IP100478003 | 1 | 74.1 | 0.77 | 0.13 | 851 | ## | A2M Alpha-2-macroglobulin precursor | n[145]AAQVTIQSSGTFSSK[272]         | 2 | 900.4907  | 5.567 | 0.42  |
| 137 | IP100478003 | 1 | 74.1 | 0.77 | 0.13 | 851 | ## | A2M Alpha-2-macroglobulin precursor | n[145]AIGVLNTGYQR                  | 2 | 700.3762  | 2.433 | 0.082 |
| 137 | IP100478003 | 1 | 74.1 | 0.77 | 0.13 | 851 | ## | A2M Alpha-2-macroglobulin precursor | n[145]ALLAYAFALAGNQDK[272]         | 2 | 927.5218  | 4.526 | 0.422 |
| 137 | IP100478003 | 1 | 74.1 | 0.77 | 0.13 | 851 | ## | A2M Alpha-2-macroglobulin precursor | n[145]ATVLNLYLPK[272]              | 2 | 653.9023  | 1.422 | 0.077 |
| 137 | IP100478003 | 1 | 74.1 | 0.77 | 0.13 | 851 | ## | A2M Alpha-2-macroglobulin precursor | n[145]AVLPTGDVIGDSAK[272]          | 2 | 815.9664  | 4.545 | 0.532 |
| 137 | IP100478003 | 1 | 74.1 | 0.77 | 0.13 | 851 | ## | A2M Alpha-2-macroglobulin precursor | n[145]DMYSFLEDMGLK[272]            | 2 | 868.9275  | 4.838 | 0.401 |
| 137 | IP100478003 | 1 | 74.1 | 0.77 | 0.13 | 851 | ## | A2M Alpha-2-macroglobulin precursor | n[145]DMYSFLEDM[147]GLK[272]       | 2 | 876.925   | 4.138 | 0.43  |
| 137 | IP100478003 | 1 | 74.1 | 0.77 | 0.13 | 851 | ## | A2M Alpha-2-macroglobulin precursor | n[145]DM[147]YSFLEDMGLK[272]       | 2 | 876.925   | 4.15  | 0.469 |
| 137 | IP100478003 | 1 | 74.1 | 0.77 | 0.13 | 851 | ## | A2M Alpha-2-macroglobulin precursor | n[145]DTVIK[272]PLLVEPEGLEK[272]   | 2 | 1106.6619 | 5.104 | 0.538 |
| 137 | IP100478003 | 1 | 74.1 | 0.77 | 0.13 | 851 | ## | A2M Alpha-2-macroglobulin precursor | n[145]ETTFNSLLCPSGGEVSEELSLK[272]  | 2 | 1337.6634 | 5.364 | 0.47  |
| 137 | IP100478003 | 1 | 74.1 | 0.77 | 0.13 | 851 | ## | A2M Alpha-2-macroglobulin precursor | n[145]GITYTPVSSTNEK[272]           | 2 | 842.9535  | 4.348 | 0.485 |
| 137 | IP100478003 | 1 | 74.1 | 0.77 | 0.13 | 851 | ## | A2M Alpha-2-macroglobulin precursor | n[145]HNVIYINGITYTPVSSTNEK[272]    | 2 | 1213.1337 | 5.988 | 0.476 |
| 137 | IP100478003 | 1 | 74.1 | 0.77 | 0.13 | 851 | ## | A2M Alpha-2-macroglobulin precursor | n[145]LLLQQVSLPELPGEYSMK[272]      | 2 | 1167.1551 | 4.097 | 0.466 |
| 137 | IP100478003 | 1 | 74.1 | 0.77 | 0.13 | 851 | ## | A2M Alpha-2-macroglobulin precursor | n[145]LLLQQVSLPELPGEYSM[147]K[272] | 2 | 1175.1526 | 4.636 | 0.437 |
| 137 | IP100478003 | 1 | 74.1 | 0.77 | 0.13 | 851 | ## | A2M Alpha-2-macroglobulin precursor | n[145]LLIYAVLPTGDVIGDSAK[272]      | 2 | 1067.1241 | 4.811 | 0.558 |
| 137 | IP100478003 | 1 | 74.1 | 0.77 | 0.13 | 851 | ## | A2M Alpha-2-macroglobulin precursor | n[145]LTAQPAPTSEDLT SATNIVK[272]   | 2 | 1173.1438 | 5.718 | 0.602 |
| 137 | IP100478003 | 1 | 74.1 | 0.77 | 0.13 | 851 | ## | A2M Alpha-2-macroglobulin precursor | n[145]MCPQLQQYEMHGPEGLR            | 2 | 1104.003  | 5.786 | 0.58  |
| 137 | IP100478003 | 1 | 74.1 | 0.77 | 0.13 | 851 | ## | A2M Alpha-2-macroglobulin precursor | n[145]MVSGFIPLK[272]PTVK[272]      | 2 | 925.0709  | 3.962 | 0.447 |
| 137 | IP100478003 | 1 | 74.1 | 0.77 | 0.13 | 851 | ## | A2M Alpha-2-macroglobulin precursor | n[145]NALFCLESAWK[272]             | 2 | 808.4144  | 3.894 | 0.406 |
| 137 | IP100478003 | 1 | 74.1 | 0.77 | 0.13 | 851 | ## | A2M Alpha-2-macroglobulin precursor | n[145]NEDSLVFVQTDK[272]            | 2 | 841.9456  | 4.448 | 0.3   |
| 137 | IP100478003 | 1 | 74.1 | 0.77 | 0.13 | 851 | ## | A2M Alpha-2-macroglobulin precursor | n[145]QFSFPLSSEPFQGSYK[272]        | 2 | 1069.0459 | 4.952 | 0.516 |
| 137 | IP100478003 | 1 | 74.1 | 0.77 | 0.13 | 851 | ## | A2M Alpha-2-macroglobulin precursor | n[145]SLFTDLEAENDVLH               | 2 | 873.937   | 5.165 | 0.538 |
| 137 | IP100478003 | 1 | 74.1 | 0.77 | 0.13 | 851 | ## | A2M Alpha-2-macroglobulin precursor | n[145]SLFTDLEAENDVLHCVA            | 2 | 1033.4882 | 4.771 | 0.386 |
| 137 | IP100478003 | 1 | 74.1 | 0.77 | 0.13 | 851 | ## | A2M Alpha-2-macroglobulin precursor | n[145]SLFTDLEAENDVLHCVAFAVPK[272]  | 2 | 1376.7001 | 4.566 | 0.601 |
| 137 | IP100478003 | 1 | 74.1 | 0.77 | 0.13 | 851 | ## | A2M Alpha-2-macroglobulin precursor | n[145]SSSNEEVMFLTVQVK[272]         | 2 | 993.5265  | 5.335 | 0.445 |
| 137 | IP100478003 | 1 | 74.1 | 0.77 | 0.13 | 851 | ## | A2M Alpha-2-macroglobulin precursor | n[145]SSSNEEVM[147]FLTVQVK[272]    | 2 | 1001.5239 | 5.759 | 0.504 |
| 137 | IP100478003 | 1 | 74.1 | 0.77 | 0.13 | 851 | ## | A2M Alpha-2-macroglobulin precursor | n[145]SSTQD TVVALHALSK[272]        | 2 | 923.0197  | 5.743 | 0.53  |
| 137 | IP100478003 | 1 | 74.1 | 0.77 | 0.13 | 851 | ## | A2M Alpha-2-macroglobulin precursor | n[145]TAQEGDHGSHVYTK[272]          | 2 | 909.4547  | 2.842 | 0.353 |
| 137 | IP100478003 | 1 | 74.1 | 0.77 | 0.13 | 851 | ## | A2M Alpha-2-macroglobulin precursor | n[145]TEHPFTVEEFVLPK[272]          | 2 | 981.0348  | 4.439 | 0.48  |
| 137 | IP100478003 | 1 | 74.1 | 0.77 | 0.13 | 851 | ## | A2M Alpha-2-macroglobulin precursor | n[145]TEVSSNHVLIYLDK[272]          | 2 | 953.5299  | 6.083 | 0.491 |
| 137 | IP100478003 | 1 | 74.1 | 0.77 | 0.13 | 851 | ## | A2M Alpha-2-macroglobulin precursor | n[145]VDLSFSPSQSLPASH              | 2 | 858.4397  | 3.958 | 0.506 |
| 137 | IP100478003 | 1 | 74.1 | 0.77 | 0.13 | 851 | ## | A2M Alpha-2-macroglobulin precursor | n[145]VDLSFSPSQSLPASHAH            | 2 | 962.4877  | 4.998 | 0.398 |
| 137 | IP100478003 | 1 | 74.1 | 0.77 | 0.13 | 851 | ## | A2M Alpha-2-macroglobulin precursor | n[145]VDLSFSPSQSLPASHHLR           | 2 | 1097.0803 | 6.995 | 0.408 |
| 137 | IP100478003 | 1 | 74.1 | 0.77 | 0.13 | 851 | ## | A2M Alpha-2-macroglobulin precursor | n[145]VGFYESDVMGR                  | 2 | 702.3409  | 2.534 | 0.168 |
| 137 | IP100478003 | 1 | 74.1 | 0.77 | 0.13 | 851 | ## | A2M Alpha-2-macroglobulin precursor | n[145]VLVPSLLHTETTEK[272]          | 2 | 928.0426  | 4.479 | 0.424 |
| 137 | IP100478003 | 1 | 74.1 | 0.77 | 0.13 | 851 | ## | A2M Alpha-2-macroglobulin precursor | n[145]VSVQLEASPAFLAVPEK[272]       | 2 | 1086.6296 | 6.189 | 0.515 |
| 137 | IP100478003 | 1 | 74.1 | 0.77 | 0.13 | 851 | ## | A2M Alpha-2-macroglobulin precursor | n[145]VTGEGCVYLQTSLK[272]          | 2 | 916.4805  | 5.636 | 0.528 |
| 137 | IP100478003 | 1 | 74.1 | 0.77 | 0.13 | 851 | ## | A2M Alpha-2-macroglobulin precursor | n[145]VYDYDETDEFIAIEYNAPCSK[272]   | 2 | 1413.1319 | 6.211 | 0.609 |
| 137 | IP100478003 | 1 | 74.1 | 0.77 | 0.13 | 851 | ## | A2M Alpha-2-macroglobulin precursor | n[145]YDVENCLANK[272]              | 2 | 751.8647  | 4.028 | 0.462 |
| 137 | IP100478003 | 1 | 74.1 | 0.77 | 0.13 | 851 | ## | A2M Alpha-2-macroglobulin precursor | n[145]YILNGGTLGLK[272]             | 2 | 775.4815  | 4.182 | 0.514 |
| 137 | IP100478003 | 1 | 74.1 | 0.77 | 0.13 | 851 | ## | A2M Alpha-2-macroglobulin precursor | n[145]YSDASDCHGEDSQAFCEK[272]      | 2 | 1186.4625 | 5.327 | 0.62  |
| 137 | IP100478003 | 1 | 74.1 | 0.77 | 0.13 | 851 | ## | A2M Alpha-2-macroglobulin precursor | AVDQSULLM[147]KPDAAELSASSVYNLLPEK  | 3 | 1118.6057 | 4.875 | 0.571 |
| 137 | IP100478003 | 1 | 74.1 | 0.77 | 0.13 | 851 | ## | A2M Alpha-2-macroglobulin precursor | DTVIKPLLVEPEGLEK                   | 3 | 734.1033  | 2.481 | 0.146 |
| 137 | IP100478003 | 1 | 74.1 | 0.77 | 0.13 | 851 | ## | A2M Alpha-2-macroglobulin precursor | FSGQLNSHGCFYQQVK                   | 3 | 723.6838  | 5.014 | 0.526 |
| 137 | IP100478003 | 1 | 74.1 | 0.77 | 0.13 | 851 | ## | A2M Alpha-2-macroglobulin precursor | GFSTQD TVVALHALSK                  | 3 | 681.0408  | 5.048 | 0.411 |
| 137 | IP100478003 | 1 | 74.1 | 0.77 | 0.13 | 851 | ## | A2M Alpha-2-macroglobulin precursor | HNVIYINGITYTPVSSTNEK               | 3 | 806.4202  | 4.455 | 0.421 |
| 137 | IP100478003 | 1 | 74.1 | 0.77 | 0.13 | 851 | ## | A2M Alpha-2-macroglobulin precursor | KPQYM[147]VLVPSLLHTETTEK           | 3 | 884.1594  | 4.808 | 0.5   |
| 137 | IP100478003 | 1 | 74.1 | 0.77 | 0.13 | 851 | ## | A2M Alpha-2-macroglobulin precursor | KYSDASDCHGEDSQAFCEK                | 3 | 878.036   | 6.714 | 0.65  |

|     |             |   |      |      |      |     |    |                                     |                                              |   |           |       |       |
|-----|-------------|---|------|------|------|-----|----|-------------------------------------|----------------------------------------------|---|-----------|-------|-------|
| 137 | IPI00478003 | 1 | 74.1 | 0.77 | 0.13 | 851 | ## | A2M Alpha-2-macroglobulin precursor | LLLQQVSLPELPGEYSM[147]K                      | 3 | 781.0994  | 3.269 | 0.221 |
| 137 | IPI00478003 | 1 | 74.1 | 0.77 | 0.13 | 851 | ## | A2M Alpha-2-macroglobulin precursor | LVHVEEPTTETVR                                | 3 | 562.6372  | 2.792 | 0.097 |
| 137 | IPI00478003 | 1 | 74.1 | 0.77 | 0.13 | 851 | ## | A2M Alpha-2-macroglobulin precursor | MVLVPSLLHTETTEK                              | 3 | 660.0396  | 4.313 | 0.432 |
| 137 | IPI00478003 | 1 | 74.1 | 0.77 | 0.13 | 851 | ## | A2M Alpha-2-macroglobulin precursor | MVSGFIPLKPTVK                                | 3 | 613.0426  | 2.28  | 0.11  |
| 137 | IPI00478003 | 1 | 74.1 | 0.77 | 0.13 | 851 | ## | A2M Alpha-2-macroglobulin precursor | PQYMVLVPSLLHTETTEK                           | 3 | 789.4311  | 4.681 | 0.366 |
| 137 | IPI00478003 | 1 | 74.1 | 0.77 | 0.13 | 851 | ## | A2M Alpha-2-macroglobulin precursor | PQYM[147]VLVPSLLHTETTEK                      | 3 | 794.7628  | 4.994 | 0.483 |
| 137 | IPI00478003 | 1 | 74.1 | 0.77 | 0.13 | 851 | ## | A2M Alpha-2-macroglobulin precursor | QFSFPLSSEPFQGSYK                             | 3 | 710.3616  | 3.137 | 0.199 |
| 137 | IPI00478003 | 1 | 74.1 | 0.77 | 0.13 | 851 | ## | A2M Alpha-2-macroglobulin precursor | QLNYKHYDGSYSTFGER                            | 3 | 782.3818  | 4.28  | 0.448 |
| 137 | IPI00478003 | 1 | 74.1 | 0.77 | 0.13 | 851 | ## | A2M Alpha-2-macroglobulin precursor | QQNAQGGFSSTQDTVVALHALSK                      | 3 | 889.7998  | 7.236 | 0.599 |
| 137 | IPI00478003 | 1 | 74.1 | 0.77 | 0.13 | 851 | ## | A2M Alpha-2-macroglobulin precursor | SLFTDLEAENDVLHCVAFAVPK                       | 3 | 915.4644  | 5.125 | 0.541 |
| 137 | IPI00478003 | 1 | 74.1 | 0.77 | 0.13 | 851 | ## | A2M Alpha-2-macroglobulin precursor | SIYKPGQTVK                                   | 3 | 514.3119  | 1.57  | 0.046 |
| 137 | IPI00478003 | 1 | 74.1 | 0.77 | 0.13 | 851 | ## | A2M Alpha-2-macroglobulin precursor | SSTQDTVVALHALSK                              | 3 | 613.0108  | 4.485 | 0.48  |
| 137 | IPI00478003 | 1 | 74.1 | 0.77 | 0.13 | 851 | ## | A2M Alpha-2-macroglobulin precursor | SVSGKPYM[147]VLVPSLLHTETTEK                  | 3 | 994.2107  | 4.756 | 0.502 |
| 137 | IPI00478003 | 1 | 74.1 | 0.77 | 0.13 | 851 | ## | A2M Alpha-2-macroglobulin precursor | TAQEGDHGSHVYTK                               | 3 | 603.9675  | 1.809 | 0.266 |
| 137 | IPI00478003 | 1 | 74.1 | 0.77 | 0.13 | 851 | ## | A2M Alpha-2-macroglobulin precursor | TEHPFTVEEFVLPK                               | 3 | 651.6875  | 4.005 | 0.341 |
| 137 | IPI00478003 | 1 | 74.1 | 0.77 | 0.13 | 851 | ## | A2M Alpha-2-macroglobulin precursor | TEVSSNHVLIYLDK                               | 3 | 633.3509  | 1.817 | 0.002 |
| 137 | IPI00478003 | 1 | 74.1 | 0.77 | 0.13 | 851 | ## | A2M Alpha-2-macroglobulin precursor | VVSMDFHPLNELIPLVYIQDPK                       | 3 | 1030.8826 | 3.767 | 0.446 |
| 137 | IPI00478003 | 1 | 74.1 | 0.77 | 0.13 | 851 | ## | A2M Alpha-2-macroglobulin precursor | VVSM[147]DENFHPLNELIPLVYIQDPK                | 3 | 1036.2143 | 5.497 | 0.465 |
| 137 | IPI00478003 | 1 | 74.1 | 0.77 | 0.13 | 851 | ## | A2M Alpha-2-macroglobulin precursor | YNILPEKEEFPFALGVQTLPTQCDPEK                  | 3 | 1191.6105 | 5.641 | 0.431 |
| 137 | IPI00478003 | 1 | 74.1 | 0.77 | 0.13 | 851 | ## | A2M Alpha-2-macroglobulin precursor | YSDASDCHGEDSQAFCEK                           | 3 | 788.6394  | 5.059 | 0.711 |
| 137 | IPI00478003 | 1 | 74.1 | 0.77 | 0.13 | 851 | ## | A2M Alpha-2-macroglobulin precursor | n[145]AGAFCLSEDAAGLISSTASLR                  | 3 | 739.3651  | 2.89  | 0.13  |
| 137 | IPI00478003 | 1 | 74.1 | 0.77 | 0.13 | 851 | ## | A2M Alpha-2-macroglobulin precursor | n[145]AQGGFSSTQDTVVALHALSK[272]              | 3 | 769.0845  | 6.566 | 0.49  |
| 137 | IPI00478003 | 1 | 74.1 | 0.77 | 0.13 | 851 | ## | A2M Alpha-2-macroglobulin precursor | n[145]AVDQSVLLM[147]K[272]PDAELSAASSVYNLLPEK | 3 | 1122.6128 | 5.314 | 0.468 |
| 137 | IPI00478003 | 1 | 74.1 | 0.77 | 0.13 | 851 | ## | A2M Alpha-2-macroglobulin precursor | n[145]DTVIK[272]PLLVEPEGLEK[272]             | 3 | 738.1104  | 3.647 | 0.285 |
| 137 | IPI00478003 | 1 | 74.1 | 0.77 | 0.13 | 851 | ## | A2M Alpha-2-macroglobulin precursor | n[145]EQAPHICANGR                            | 3 | 512.2216  | 3.75  | 0.436 |
| 137 | IPI00478003 | 1 | 74.1 | 0.77 | 0.13 | 851 | ## | A2M Alpha-2-macroglobulin precursor | n[145]FSGQLNSHGCFYQQVK[272]                  | 3 | 726.3552  | 5.518 | 0.586 |
| 137 | IPI00478003 | 1 | 74.1 | 0.77 | 0.13 | 851 | ## | A2M Alpha-2-macroglobulin precursor | n[145]GFSSTQDTVVALHALSK[272]                 | 3 | 683.7122  | 5.542 | 0.468 |
| 137 | IPI00478003 | 1 | 74.1 | 0.77 | 0.13 | 851 | ## | A2M Alpha-2-macroglobulin precursor | n[145]LHTEAQIQEETVVVELTGR                    | 3 | 752.0647  | 3.925 | 0.442 |
| 137 | IPI00478003 | 1 | 74.1 | 0.77 | 0.13 | 851 | ## | A2M Alpha-2-macroglobulin precursor | n[145]LLEIPLTVTHPVVR                         | 3 | 577.6932  | 3.348 | 0.495 |
| 137 | IPI00478003 | 1 | 74.1 | 0.77 | 0.13 | 851 | ## | A2M Alpha-2-macroglobulin precursor | n[145]LVHVEEPTTETVR                          | 3 | 563.9729  | 2.842 | 0.313 |
| 137 | IPI00478003 | 1 | 74.1 | 0.77 | 0.13 | 851 | ## | A2M Alpha-2-macroglobulin precursor | n[145]MCPQLQQYEMHGPEGLR                      | 3 | 736.3377  | 5.677 | 0.585 |
| 137 | IPI00478003 | 1 | 74.1 | 0.77 | 0.13 | 851 | ## | A2M Alpha-2-macroglobulin precursor | n[145]MCPQLQQYEM[147]HGPEGLR                 | 3 | 741.6694  | 4.264 | 0.493 |
| 137 | IPI00478003 | 1 | 74.1 | 0.77 | 0.13 | 851 | ## | A2M Alpha-2-macroglobulin precursor | n[145]MVSGFIPLK[272]PTVK[272]                | 3 | 617.0497  | 2.357 | 0.273 |
| 137 | IPI00478003 | 1 | 74.1 | 0.77 | 0.13 | 851 | ## | A2M Alpha-2-macroglobulin precursor | n[145]PQYMVLVPSLLHTETTEK[272]                | 3 | 792.1025  | 3.953 | 0.225 |
| 137 | IPI00478003 | 1 | 74.1 | 0.77 | 0.13 | 851 | ## | A2M Alpha-2-macroglobulin precursor | n[145]PQYM[147]VLVPSLLHTETTEK[272]           | 3 | 797.4342  | 4.834 | 0.431 |
| 137 | IPI00478003 | 1 | 74.1 | 0.77 | 0.13 | 851 | ## | A2M Alpha-2-macroglobulin precursor | n[145]QFSFPLSSEPFQGSYK[272]                  | 3 | 713.033   | 3.281 | 0.132 |
| 137 | IPI00478003 | 1 | 74.1 | 0.77 | 0.13 | 851 | ## | A2M Alpha-2-macroglobulin precursor | n[145]QLNYK[272]HYDGSYSTFGER                 | 3 | 785.0532  | 4.578 | 0.48  |
| 137 | IPI00478003 | 1 | 74.1 | 0.77 | 0.13 | 851 | ## | A2M Alpha-2-macroglobulin precursor | n[145]QQNAQGGFSSTQDTVVALHALSK[272]           | 3 | 892.4712  | 7.587 | 0.565 |
| 137 | IPI00478003 | 1 | 74.1 | 0.77 | 0.13 | 851 | ## | A2M Alpha-2-macroglobulin precursor | n[145]SFVHLEPMSHELPCGH                       | 3 | 670.6433  | 5.013 | 0.476 |
| 137 | IPI00478003 | 1 | 74.1 | 0.77 | 0.13 | 851 | ## | A2M Alpha-2-macroglobulin precursor | n[145]SFVHLEPMSHELPCGHTQTVQAH                | 3 | 925.7689  | 5.528 | 0.487 |
| 137 | IPI00478003 | 1 | 74.1 | 0.77 | 0.13 | 851 | ## | A2M Alpha-2-macroglobulin precursor | n[145]SLFTDLEAENDVLHCVAFAVPK[272]            | 3 | 918.1358  | 5.827 | 0.504 |
| 137 | IPI00478003 | 1 | 74.1 | 0.77 | 0.13 | 851 | ## | A2M Alpha-2-macroglobulin precursor | n[145]SLNEEAVK[272]K[272]                    | 3 | 483.9594  | 3.202 | 0.377 |
| 137 | IPI00478003 | 1 | 74.1 | 0.77 | 0.13 | 851 | ## | A2M Alpha-2-macroglobulin precursor | n[145]SIYK[272]PGQTVK[272]                   | 3 | 518.319   | 3.034 | 0.335 |
| 137 | IPI00478003 | 1 | 74.1 | 0.77 | 0.13 | 851 | ## | A2M Alpha-2-macroglobulin precursor | n[145]SSTQDTVVALHALSK[272]                   | 3 | 615.6822  | 4.539 | 0.418 |
| 137 | IPI00478003 | 1 | 74.1 | 0.77 | 0.13 | 851 | ## | A2M Alpha-2-macroglobulin precursor | n[145]SVSGK[272]PQYMVLVPSLLHTETTEK[272]      | 3 | 992.8862  | 4.696 | 0.513 |
| 137 | IPI00478003 | 1 | 74.1 | 0.77 | 0.13 | 851 | ## | A2M Alpha-2-macroglobulin precursor | n[145]SVSGK[272]PQYM[147]VLVPSLLHTETTEK[272] | 3 | 998.2178  | 5.435 | 0.473 |
| 137 | IPI00478003 | 1 | 74.1 | 0.77 | 0.13 | 851 | ## | A2M Alpha-2-macroglobulin precursor | n[145]TAQEGDHGSHVYTK[272]                    | 3 | 606.6389  | 2.208 | 0.297 |
| 137 | IPI00478003 | 1 | 74.1 | 0.77 | 0.13 | 851 | ## | A2M Alpha-2-macroglobulin precursor | n[145]VDLSFSPSQSLPASHHLR                     | 3 | 731.7226  | 3.918 | 0.442 |

|     |             |   |      |      |      |     |    |                                     |                                               |   |           |       |       |
|-----|-------------|---|------|------|------|-----|----|-------------------------------------|-----------------------------------------------|---|-----------|-------|-------|
| 137 | IP100478003 | 1 | 74.1 | 0.77 | 0.13 | 851 | ## | A2M Alpha-2-macroglobulin precursor | n[145]VSVQLEASPAFLAVPVEK[272]                 | 3 | 724.7555  | 3.957 | 0.249 |
| 137 | IP100478003 | 1 | 74.1 | 0.77 | 0.13 | 851 | ## | A2M Alpha-2-macroglobulin precursor | n[145]VVSMDENFHPLNELIPLVYIQDPK[272]           | 3 | 1033.554  | 4.828 | 0.473 |
| 137 | IP100478003 | 1 | 74.1 | 0.77 | 0.13 | 851 | ## | A2M Alpha-2-macroglobulin precursor | n[145]VYDYDETDEFAIAEYNAPCSK[272]              | 3 | 942.4237  | 2.343 | 0.043 |
| 137 | IP100478003 | 1 | 74.1 | 0.77 | 0.13 | 851 | ## | A2M Alpha-2-macroglobulin precursor | n[145]YMVLVPSLLHTTETEK[272]                   | 3 | 717.0654  | 4.157 | 0.316 |
| 137 | IP100478003 | 1 | 74.1 | 0.77 | 0.13 | 851 | ## | A2M Alpha-2-macroglobulin precursor | n[145]YNILPEK[272]EEFFPFGALGVQTLPQTCDEPK[272] | 3 | 1195.6176 | 6.275 | 0.546 |
| 137 | IP100478003 | 1 | 74.1 | 0.77 | 0.13 | 851 | ## | A2M Alpha-2-macroglobulin precursor | n[145]YSDASDCHGEDSQAFCEK[272]                 | 3 | 791.3108  | 3.857 | 0.499 |
| 137 | IP100478003 | 1 | 74.1 | 0.77 | 0.13 | 851 | ## | A2M Alpha-2-macroglobulin precursor | KPQYMVLVPSLLHTTETEK                           | 4 | 659.3727  | 3.972 | 0.435 |
| 137 | IP100478003 | 1 | 74.1 | 0.77 | 0.13 | 851 | ## | A2M Alpha-2-macroglobulin precursor | KPQYM[147]VLVPSLLHTTETEK                      | 4 | 663.3714  | 4.214 | 0.468 |
| 137 | IP100478003 | 1 | 74.1 | 0.77 | 0.13 | 851 | ## | A2M Alpha-2-macroglobulin precursor | SVSGKPQYM[147]VLVPSLLHTTETEK                  | 4 | 745.9099  | 3.157 | 0.315 |
| 137 | IP100478003 | 1 | 74.1 | 0.77 | 0.13 | 851 | ## | A2M Alpha-2-macroglobulin precursor | n[145]SFVHLEPM[147]SHELPCGH                   | 4 | 507.233   | 4.929 | 0.474 |
| 137 | IP100478003 | 1 | 74.1 | 0.77 | 0.13 | 851 | ## | A2M Alpha-2-macroglobulin precursor | n[145]SGK[272]PQYM[147]VLVPSLLHTTETEK[272]    | 4 | 702.3901  | 4.027 | 0.459 |
| 137 | IP100478003 | 1 | 74.1 | 0.77 | 0.13 | 851 | ## | A2M Alpha-2-macroglobulin precursor | n[145]SVSGK[272]PQYMLVPSLLHTTETEK[272]        | 4 | 744.9165  | 4.5   | 0.534 |
| 137 | IP100478003 | 1 | 74.1 | 0.77 | 0.13 | 851 | ## | A2M Alpha-2-macroglobulin precursor | n[145]SVSGK[272]PQYM[147]VLVPSLLHTTETEK[272]  | 4 | 748.9152  | 3.005 | 0.176 |
| 137 | IP100478003 | 1 | 74.1 | 0.77 | 0.13 | 851 | ## | A2M Alpha-2-macroglobulin precursor | n[145]TAQEGDHGSHVYTK[272]                     | 4 | 455.231   | 2.919 | 0.507 |
| 137 | IP100478003 | 1 | 74.1 | 0.77 | 0.13 | 851 | ## | A2M Alpha-2-macroglobulin precursor | n[145]SFVHLEPMSHELPCGHTQTVQAH                 | 5 | 555.8643  | 3.573 | 0.334 |
| 137 | IP100478003 | 1 | 74.1 | 0.77 | 0.13 | 851 | ## | A2M Alpha-2-macroglobulin precursor | ATVLNYLPK                                     | 2 | 649.8952  | 2.663 | 0.344 |
| 137 | IP100478003 | 1 | 74.1 | 0.77 | 0.13 | 851 | ## | A2M Alpha-2-macroglobulin precursor | AAQVTIQSSGTFSSK                               | 3 | 597.9915  | 3.143 | 0.276 |
| 137 | IP100478003 | 1 | 74.1 | 0.77 | 0.13 | 851 | ## | A2M Alpha-2-macroglobulin precursor | AVDQSVLLMKPDAELSASSVYNLLPEK                   | 3 | 1113.2741 | 4.221 | 0.325 |
| 137 | IP100478003 | 1 | 74.1 | 0.77 | 0.13 | 851 | ## | A2M Alpha-2-macroglobulin precursor | M[147]VSGFIPLKPTVK                            | 3 | 618.3743  | 1.861 | 0.035 |
| 137 | IP100478003 | 1 | 74.1 | 0.77 | 0.13 | 851 | ## | A2M Alpha-2-macroglobulin precursor | SKAIGYLNTGYQR                                 | 3 | 584.3248  | 3.689 | 0.339 |
| 137 | IP100478003 | 1 | 74.1 | 0.77 | 0.13 | 851 | ## | A2M Alpha-2-macroglobulin precursor | SLNEEAVKK                                     | 3 | 479.9523  | 3.168 | 0.253 |
| 137 | IP100478003 | 1 | 74.1 | 0.77 | 0.13 | 851 | ## | A2M Alpha-2-macroglobulin precursor | TGTHGLLVKQEDM[147]K                           | 3 | 665.0348  | 3.269 | 0.361 |
| 137 | IP100478003 | 1 | 74.1 | 0.77 | 0.13 | 851 | ## | A2M Alpha-2-macroglobulin precursor | VSVQLEASPAFLAVPVEK                            | 3 | 722.0841  | 3.643 | 0.31  |
| 137 | IP100478003 | 1 | 74.1 | 0.77 | 0.13 | 851 | ## | A2M Alpha-2-macroglobulin precursor | n[145]AAQVTIQSSGTFSSK[272]                    | 3 | 600.6629  | 2.692 | 0.173 |
| 137 | IP100478003 | 1 | 74.1 | 0.77 | 0.13 | 851 | ## | A2M Alpha-2-macroglobulin precursor | n[145]AVDQSVLLMK[272]PDAELSASSVYNLLPEK[272]   | 3 | 1117.2812 | 4.06  | 0.327 |
| 137 | IP100478003 | 1 | 74.1 | 0.77 | 0.13 | 851 | ## | A2M Alpha-2-macroglobulin precursor | n[145]HNVIYINGITYTPVSSSTNEK[272]              | 3 | 809.0916  | 3.837 | 0.196 |
| 137 | IP100478003 | 1 | 74.1 | 0.77 | 0.13 | 851 | ## | A2M Alpha-2-macroglobulin precursor | n[145]HYDGSYSTFGER                            | 3 | 521.5713  | 2.617 | 0.318 |
| 137 | IP100478003 | 1 | 74.1 | 0.77 | 0.13 | 851 | ## | A2M Alpha-2-macroglobulin precursor | n[145]LLLQVSLPELPEGEYSMK[272]                 | 3 | 778.4392  | 3.875 | 0.302 |
| 137 | IP100478003 | 1 | 74.1 | 0.77 | 0.13 | 851 | ## | A2M Alpha-2-macroglobulin precursor | n[145]LLLQVSLPELPEGEYSM[147]K[272]            | 3 | 783.7708  | 3.395 | 0.162 |
| 137 | IP100478003 | 1 | 74.1 | 0.77 | 0.13 | 851 | ## | A2M Alpha-2-macroglobulin precursor | n[145]SK[272]AIGYLNTGYQR                      | 3 | 586.9962  | 4.013 | 0.309 |
| 137 | IP100478003 | 1 | 74.1 | 0.77 | 0.13 | 851 | ## | A2M Alpha-2-macroglobulin precursor | n[145]TEHPFTVEEFVLPK[272]                     | 3 | 654.3589  | 3.895 | 0.325 |
| 137 | IP100478003 | 1 | 74.1 | 0.77 | 0.13 | 851 | ## | A2M Alpha-2-macroglobulin precursor | n[145]TEVSSNHVLIYLDK[272]                     | 3 | 636.0223  | 2.978 | 0.199 |
| 137 | IP100478003 | 1 | 74.1 | 0.77 | 0.13 | 851 | ## | A2M Alpha-2-macroglobulin precursor | n[145]VVSM[147]DENFHPLNELIPLVYIQDPK[272]      | 3 | 1038.8857 | 3.52  | 0.306 |
| 137 | IP100478003 | 1 | 74.1 | 0.77 | 0.13 | 851 | ## | A2M Alpha-2-macroglobulin precursor | QQNAQGGFSSTQDTVVALHALSK                       | 4 | 667.6017  | 3.997 | 0.327 |
| 137 | IP100478003 | 1 | 74.1 | 0.77 | 0.13 | 851 | ## | A2M Alpha-2-macroglobulin precursor | NEDSLVFVQTDK                                  | 2 | 837.9385  | 3.772 | 0.418 |
| 137 | IP100478003 | 1 | 74.1 | 0.77 | 0.13 | 851 | ## | A2M Alpha-2-macroglobulin precursor | SLNEEAVKK                                     | 2 | 719.4249  | 3.757 | 0.317 |
| 137 | IP100478003 | 1 | 74.1 | 0.77 | 0.13 | 851 | ## | A2M Alpha-2-macroglobulin precursor | SIYKPGQTVK                                    | 2 | 770.9642  | 1.25  | 0.016 |
| 137 | IP100478003 | 1 | 74.1 | 0.77 | 0.13 | 851 | ## | A2M Alpha-2-macroglobulin precursor | SSGSLNNAIK                                    | 2 | 692.4014  | 3.62  | 0.366 |
| 137 | IP100478003 | 1 | 74.1 | 0.77 | 0.13 | 851 | ## | A2M Alpha-2-macroglobulin precursor | n[145]EQAPHICANGR                             | 2 | 767.8288  | 3.292 | 0.47  |
| 137 | IP100478003 | 1 | 74.1 | 0.77 | 0.13 | 851 | ## | A2M Alpha-2-macroglobulin precursor | n[145]SLNEEAVK[272]K[272]                     | 2 | 725.4355  | 3.846 | 0.351 |
| 137 | IP100478003 | 1 | 74.1 | 0.77 | 0.13 | 851 | ## | A2M Alpha-2-macroglobulin precursor | n[145]SSGSLNNAIK[272]                         | 2 | 696.4085  | 3.957 | 0.357 |
| 137 | IP100478003 | 1 | 74.1 | 0.77 | 0.13 | 851 | ## | A2M Alpha-2-macroglobulin precursor | n[145]VTAAPQSVICALR                           | 2 | 703.3742  | 3.375 | 0.302 |
| 137 | IP100478003 | 1 | 74.1 | 0.77 | 0.13 | 851 | ## | A2M Alpha-2-macroglobulin precursor | n[145]YGAATFTR                                | 2 | 515.7756  | 2.604 | 0.238 |
| 137 | IP100478003 | 1 | 74.1 | 0.77 | 0.13 | 851 | ## | A2M Alpha-2-macroglobulin precursor | n[145]DMYSFLEDM[147]GLK[272]                  | 3 | 584.9524  | 3.078 | 0.286 |
| 137 | IP100478003 | 1 | 74.1 | 0.77 | 0.13 | 851 | ## | A2M Alpha-2-macroglobulin precursor | n[145]GPTQEFK[272]K[272]                      | 3 | 456.2734  | 2.776 | 0.22  |
| 137 | IP100478003 | 1 | 74.1 | 0.77 | 0.13 | 851 | ## | A2M Alpha-2-macroglobulin precursor | n[145]TGTHGLLVK[272]QEDM[147]K[272]           | 4 | 502.0333  | 2.427 | 0.288 |
| 137 | IP100478003 | 1 | 74.1 | 0.77 | 0.13 | 851 | ## | A2M Alpha-2-macroglobulin precursor | n[145]VDLSFSPSQSLPASHHLR                      | 4 | 549.0438  | 2.683 | 0.231 |
| 137 | IP100478003 | 1 | 74.1 | 0.77 | 0.13 | 851 | ## | A2M Alpha-2-macroglobulin precursor | LPPNVVEESAR                                   | 2 | 675.8725  | 2.157 | 0     |

|     |             |   |      |      |      |     |    |                                     |                              |   |           |       |       |
|-----|-------------|---|------|------|------|-----|----|-------------------------------------|------------------------------|---|-----------|-------|-------|
| 137 | IPI00478003 | 1 | 74.1 | 0.77 | 0.13 | 851 | ## | A2M Alpha-2-macroglobulin precursor | n[145]DNGCFR                 | 2 | 451.1925  | 2.125 | 0.346 |
| 137 | IPI00478003 | 1 | 74.1 | 0.77 | 0.13 | 851 | ## | A2M Alpha-2-macroglobulin precursor | n[145]SASNMAIVDVK[272]       | 2 | 711.8969  | 2.985 | 0.155 |
| 137 | IPI00478003 | 1 | 74.1 | 0.77 | 0.13 | 851 | ## | A2M Alpha-2-macroglobulin precursor | n[145]SIYK[272]PGQTVK[272]   | 2 | 776.9748  | 1.231 | 0.01  |
| 137 | IPI00478003 | 1 | 74.1 | 0.77 | 0.13 | 851 | ## | A2M Alpha-2-macroglobulin precursor | KPQYMLVPSLLHTEK              | 3 | 878.8278  | 4.987 | 0.359 |
| 137 | IPI00478003 | 1 | 74.1 | 0.77 | 0.13 | 851 | ## | A2M Alpha-2-macroglobulin precursor | SVSGKPQYMLVPSLLHTEK          | 3 | 988.8791  | 4.885 | 0.43  |
| 137 | IPI00478003 | 1 | 74.1 | 0.77 | 0.13 | 851 | ## | A2M Alpha-2-macroglobulin precursor | n[145]GHFSISIPVK[272]        | 3 | 458.2779  | 2.568 | 0.254 |
| 137 | IPI00478003 | 1 | 74.1 | 0.77 | 0.13 | 851 | ## | A2M Alpha-2-macroglobulin precursor | n[145]MVLVPSLLHTEK[272]      | 3 | 662.711   | 4.446 | 0.372 |
| 137 | IPI00478003 | 1 | 74.1 | 0.77 | 0.13 | 851 | ## | A2M Alpha-2-macroglobulin precursor | n[145]STQDTVVALHALSK[272]    | 3 | 586.6715  | 3.75  | 0.424 |
| 137 | IPI00478003 | 1 | 74.1 | 0.77 | 0.13 | 851 | ## | A2M Alpha-2-macroglobulin precursor | n[145]VVVQK[272]K[272]       | 3 | 378.2641  | 1.898 | 0.301 |
| 137 | IPI00478003 | 1 | 74.1 | 0.77 | 0.13 | 851 | ## | A2M Alpha-2-macroglobulin precursor | SLNEEAVK                     | 1 | 1169.6526 | 2.836 | 0.185 |
| 137 | IPI00478003 | 1 | 74.1 | 0.77 | 0.13 | 851 | ## | A2M Alpha-2-macroglobulin precursor | FEVQVTVPK                    | 2 | 663.8927  | 2.84  | 0.327 |
| 137 | IPI00478003 | 1 | 74.1 | 0.77 | 0.13 | 851 | ## | A2M Alpha-2-macroglobulin precursor | SASNMAIVDVK                  | 2 | 707.8898  | 3.457 | 0.181 |
| 137 | IPI00478003 | 1 | 74.1 | 0.77 | 0.13 | 851 | ## | A2M Alpha-2-macroglobulin precursor | n[145]HYDGSYSTFGER           | 2 | 781.8533  | 2.146 | 0.167 |
| 137 | IPI00478003 | 1 | 74.1 | 0.77 | 0.13 | 851 | ## | A2M Alpha-2-macroglobulin precursor | n[145]LVHVEEPTETVR           | 2 | 845.4557  | 2.984 | 0.34  |
| 137 | IPI00478003 | 1 | 74.1 | 0.77 | 0.13 | 851 | ## | A2M Alpha-2-macroglobulin precursor | n[145]VGFYESDVM[147]GR       | 2 | 710.3384  | 2.156 | 0.263 |
| 137 | IPI00478003 | 1 | 74.1 | 0.77 | 0.13 | 851 | ## | A2M Alpha-2-macroglobulin precursor | DLKPAIVK                     | 3 | 435.2869  | 2.515 | 0.232 |
| 137 | IPI00478003 | 1 | 74.1 | 0.77 | 0.13 | 851 | ## | A2M Alpha-2-macroglobulin precursor | GPTQEFKK                     | 3 | 452.2663  | 3.009 | 0.164 |
| 137 | IPI00478003 | 1 | 74.1 | 0.77 | 0.13 | 851 | ## | A2M Alpha-2-macroglobulin precursor | n[145]SLNEEAVK[272]          | 1 | 1177.6668 | 2.898 | 0.199 |
| 137 | IPI00478003 | 1 | 74.1 | 0.77 | 0.13 | 851 | ## | A2M Alpha-2-macroglobulin precursor | n[145]LPPNVVEESAR            | 2 | 677.876   | 2.57  | 0.423 |
| 137 | IPI00478003 | 1 | 74.1 | 0.77 | 0.13 | 851 | ## | A2M Alpha-2-macroglobulin precursor | AQGGFSTQDTVVALHALSK          | 3 | 766.4131  | 4.827 | 0.35  |
| 137 | IPI00478003 | 1 | 74.1 | 0.77 | 0.13 | 851 | ## | A2M Alpha-2-macroglobulin precursor | n[145]AFQPFFVELTM[147]PYSVIR | 3 | 735.7227  | 3.847 | 0.203 |
| 137 | IPI00478003 | 1 | 74.1 | 0.77 | 0.13 | 851 | ## | A2M Alpha-2-macroglobulin precursor | YGAAFTFR                     | 1 | 1026.5368 | 2.424 | 0.24  |
| 137 | IPI00478003 | 1 | 74.1 | 0.77 | 0.13 | 851 | ## | A2M Alpha-2-macroglobulin precursor | n[145]AIGYLNTGYQR            | 1 | 1399.7451 | 2.863 | 0.318 |
| 137 | IPI00478003 | 1 | 74.1 | 0.77 | 0.13 | 851 | ## | A2M Alpha-2-macroglobulin precursor | n[145]LSFYLLIM[147]AK[272]   | 2 | 776.938   | 3.816 | 0.335 |
| 137 | IPI00478003 | 1 | 74.1 | 0.77 | 0.13 | 851 | ## | A2M Alpha-2-macroglobulin precursor | YNILPEKEEFPALGVQTLPTCDEPK    | 4 | 893.9597  | 2.722 | 0.117 |
| 137 | IPI00478003 | 1 | 74.1 | 0.77 | 0.13 | 851 | ## | A2M Alpha-2-macroglobulin precursor | n[145]VVVQK[272]             | 1 | 860.5808  | 1.601 | 0.126 |
| 137 | IPI00478003 | 1 | 74.1 | 0.77 | 0.13 | 851 | ## | A2M Alpha-2-macroglobulin precursor | DNGCFR                       | 2 | 449.1889  | 2.036 | 0.331 |
| 137 | IPI00478003 | 1 | 74.1 | 0.77 | 0.13 | 851 | ## | A2M Alpha-2-macroglobulin precursor | n[145]FEVQVTVPK[272]         | 2 | 667.8998  | 2.066 | 0.151 |
| 137 | IPI00478003 | 1 | 74.1 | 0.77 | 0.13 | 851 | ## | A2M Alpha-2-macroglobulin precursor | n[145]FQVDNNNR               | 2 | 575.7897  | 2.631 | 0.171 |
| 137 | IPI00478003 | 1 | 74.1 | 0.77 | 0.13 | 851 | ## | A2M Alpha-2-macroglobulin precursor | n[145]GPTQEFK[272]           | 2 | 547.8079  | 2.84  | 0.191 |
| 137 | IPI00478003 | 1 | 74.1 | 0.77 | 0.13 | 851 | ## | A2M Alpha-2-macroglobulin precursor | n[145]SLNEEAVK[272]          | 2 | 589.337   | 2.688 | 0.141 |
| 137 | IPI00478003 | 1 | 74.1 | 0.77 | 0.13 | 851 | ## | A2M Alpha-2-macroglobulin precursor | KYSDASDCHGEDSQAFCEK          | 4 | 658.7789  | 2.494 | 0.159 |
| 137 | IPI00478003 | 1 | 74.1 | 0.77 | 0.13 | 851 | ## | A2M Alpha-2-macroglobulin precursor | n[145]SFVHLEPMSHELPCGH       | 4 | 503.2343  | 4.251 | 0.344 |
| 137 | IPI00478003 | 1 | 74.1 | 0.77 | 0.13 | 851 | ## | A2M Alpha-2-macroglobulin precursor | n[145]SDIAPVAR               | 1 | 972.5595  | 2.406 | 0.057 |
| 137 | IPI00478003 | 1 | 74.1 | 0.77 | 0.13 | 851 | ## | A2M Alpha-2-macroglobulin precursor | SASNM[147]AIVDVK             | 2 | 715.8873  | 3.619 | 0.171 |
| 137 | IPI00478003 | 1 | 74.1 | 0.77 | 0.13 | 851 | ## | A2M Alpha-2-macroglobulin precursor | DNSVHWER                     | 3 | 394.8599  | 2.967 | 0.358 |
| 137 | IPI00478003 | 1 | 74.1 | 0.77 | 0.13 | 851 | ## | A2M Alpha-2-macroglobulin precursor | TITKLSFVK                    | 3 | 486.3132  | 2.24  | 0.314 |
| 137 | IPI00478003 | 1 | 74.1 | 0.77 | 0.13 | 851 | ## | A2M Alpha-2-macroglobulin precursor | n[145]YGAAFTFR               | 1 | 1030.5439 | 1.848 | 0.355 |
| 137 | IPI00478003 | 1 | 74.1 | 0.77 | 0.13 | 851 | ## | A2M Alpha-2-macroglobulin precursor | n[145]SASNM[147]AIVDVK[272]  | 2 | 719.8944  | 2.986 | 0.127 |
| 137 | IPI00478003 | 1 | 74.1 | 0.77 | 0.13 | 851 | ## | A2M Alpha-2-macroglobulin precursor | DLKPAIVK                     | 2 | 652.4267  | 2.425 | 0.2   |
| 137 | IPI00478003 | 1 | 74.1 | 0.77 | 0.13 | 851 | ## | A2M Alpha-2-macroglobulin precursor | GEAFTLK                      | 2 | 523.3057  | 2.332 | 0.171 |
| 137 | IPI00478003 | 1 | 74.1 | 0.77 | 0.13 | 851 | ## | A2M Alpha-2-macroglobulin precursor | SLNEEAVK                     | 2 | 585.3299  | 2.984 | 0.159 |
| 137 | IPI00478003 | 1 | 74.1 | 0.77 | 0.13 | 851 | ## | A2M Alpha-2-macroglobulin precursor | n[145]GEAFTLK[272]           | 2 | 527.3128  | 2.404 | 0.191 |
| 137 | IPI00478003 | 1 | 74.1 | 0.77 | 0.13 | 851 | ## | A2M Alpha-2-macroglobulin precursor | SVSGKPQYMLVPSLLHTEK          | 4 | 741.9112  | 3.785 | 0.221 |
| 137 | IPI00478003 | 1 | 74.1 | 0.77 | 0.13 | 851 | ## | A2M Alpha-2-macroglobulin precursor | GHFSISIPVK                   | 2 | 682.9061  | 2.609 | 0.292 |
| 137 | IPI00478003 | 1 | 74.1 | 0.77 | 0.13 | 851 | ## | A2M Alpha-2-macroglobulin precursor | GPTQEFK                      | 2 | 543.8008  | 2.143 | 0.148 |
| 137 | IPI00478003 | 1 | 74.1 | 0.77 | 0.13 | 851 | ## | A2M Alpha-2-macroglobulin precursor | GEAFTLK                      | 1 | 1045.6042 | 2.389 | 0.044 |
| 137 | IPI00478003 | 1 | 74.1 | 0.77 | 0.13 | 851 | ## | A2M Alpha-2-macroglobulin precursor | n[145]GHFSISIPVK[272]        | 2 | 686.9132  | 2.331 | 0.326 |

|     |             |   |      |      |      |     |    |                                     |                                             |   |           |       |       |
|-----|-------------|---|------|------|------|-----|----|-------------------------------------|---------------------------------------------|---|-----------|-------|-------|
| 137 | IPI00478003 | 1 | 74.1 | 0.77 | 0.13 | 851 | ## | A2M Alpha-2-macroglobulin precursor | n[145]SDIAPVAR                              | 2 | 486.7834  | 2.418 | 0.026 |
| 137 | IPI00478003 | 1 | 74.1 | 0.77 | 0.13 | 851 | ## | A2M Alpha-2-macroglobulin precursor | GVPIPNK                                     | 2 | 502.8162  | 2.324 | 0.225 |
| 137 | IPI00478003 | 1 | 74.1 | 0.77 | 0.13 | 851 | ## | A2M Alpha-2-macroglobulin precursor | DMYSFLEDM[147]GLK                           | 3 | 582.281   | 2.511 | 0.244 |
| 137 | IPI00478003 | 1 | 74.1 | 0.77 | 0.13 | 851 | ## | A2M Alpha-2-macroglobulin precursor | n[145]IAQWQSFQLEGLK                         | 3 | 630.3516  | 3.164 | 0.265 |
| 137 | IPI00478003 | 1 | 74.1 | 0.77 | 0.13 | 851 | ## | A2M Alpha-2-macroglobulin precursor | n[145]QGIPFFGQVR                            | 2 | 646.8652  | 2.295 | 0.022 |
| 137 | IPI00478003 | 1 | 74.1 | 0.77 | 0.13 | 851 | ## | A2M Alpha-2-macroglobulin precursor | VVVQK                                       | 1 | 852.5666  | 1.813 | 0.15  |
| 137 | IPI00478003 | 1 | 74.1 | 0.77 | 0.13 | 851 | ## | A2M Alpha-2-macroglobulin precursor | n[145]GEAFTLK[272]                          | 1 | 1053.6184 | 2.164 | 0.061 |
| 137 | IPI00478003 | 1 | 74.1 | 0.77 | 0.13 | 851 | ## | A2M Alpha-2-macroglobulin precursor | DMYSFLEDMGLK                                | 3 | 576.9494  | 2.477 | 0.216 |
| 137 | IPI00478003 | 1 | 74.1 | 0.77 | 0.13 | 851 | ## | A2M Alpha-2-macroglobulin precursor | KEYEMK                                      | 3 | 416.5654  | 2.443 | 0.128 |
| 137 | IPI00478003 | 1 | 74.1 | 0.77 | 0.13 | 851 | ## | A2M Alpha-2-macroglobulin precursor | n[145]LSFVK[272]VDSHFR                      | 3 | 541.6468  | 2.831 | 0.223 |
| 137 | IPI00478003 | 1 | 74.1 | 0.77 | 0.13 | 851 | ## | A2M Alpha-2-macroglobulin precursor | n[145]FQVDNNNR                              | 1 | 1150.5722 | 2.413 | 0.164 |
| 137 | IPI00478003 | 1 | 74.1 | 0.77 | 0.13 | 851 | ## | A2M Alpha-2-macroglobulin precursor | n[145]AFQPPFVELTM[147]PYSVIR                | 2 | 1103.0804 | 4.222 | 0.318 |
| 137 | IPI00478003 | 1 | 74.1 | 0.77 | 0.13 | 851 | ## | A2M Alpha-2-macroglobulin precursor | n[145]DLK[272]PAIVK[272]                    | 2 | 658.4374  | 2.086 | 0.106 |
| 137 | IPI00478003 | 1 | 74.1 | 0.77 | 0.13 | 851 | ## | A2M Alpha-2-macroglobulin precursor | DMYSFLEDM[147]GLK                           | 2 | 872.9179  | 2.128 | 0.298 |
| 137 | IPI00478003 | 1 | 74.1 | 0.77 | 0.13 | 851 | ## | A2M Alpha-2-macroglobulin precursor | n[145]TTVM[147]VK[272]                      | 2 | 491.7959  | 2.028 | 0.206 |
| 137 | IPI00478003 | 1 | 74.1 | 0.77 | 0.13 | 851 | ## | A2M Alpha-2-macroglobulin precursor | VDLSFSPSQSLPASHAHL                          | 3 | 678.3532  | 4.549 | 0.255 |
| 137 | IPI00478003 | 1 | 74.1 | 0.77 | 0.13 | 851 | ## | A2M Alpha-2-macroglobulin precursor | n[145]YK[272]PGQTVK[272]                    | 3 | 451.6136  | 2.483 | 0.337 |
| 137 | IPI00478003 | 1 | 74.1 | 0.77 | 0.13 | 851 | ## | A2M Alpha-2-macroglobulin precursor | n[145]AVDQSVLLMK[272]PDAELSASSVYNLLPEK[272] | 4 | 838.2127  | 3.477 | 0.097 |
| 137 | IPI00478003 | 1 | 74.1 | 0.77 | 0.13 | 851 | ## | A2M Alpha-2-macroglobulin precursor | n[145]GVPIPNK[272]                          | 2 | 506.8233  | 2.066 | 0.197 |
| 137 | IPI00478003 | 1 | 74.1 | 0.77 | 0.13 | 851 | ## | A2M Alpha-2-macroglobulin precursor | n[145]TTVMVK[272]                           | 2 | 483.7985  | 2.196 | 0.162 |
| 137 | IPI00478003 | 1 | 74.1 | 0.77 | 0.13 | 851 | ## | A2M Alpha-2-macroglobulin precursor | VSGFIPLKPTVK                                | 3 | 569.3625  | 2.601 | 0.35  |
| 137 | IPI00478003 | 1 | 74.1 | 0.77 | 0.13 | 851 | ## | A2M Alpha-2-macroglobulin precursor | n[145]TK[272]VFQLK[272]                     | 3 | 432.6186  | 2.888 | 0.145 |
| 137 | IPI00478003 | 1 | 74.1 | 0.77 | 0.13 | 851 | ## | A2M Alpha-2-macroglobulin precursor | n[145]VDLSFSPSQSLPASHAHL                    | 3 | 679.6889  | 3.5   | 0.256 |
| 137 | IPI00478003 | 1 | 74.1 | 0.77 | 0.13 | 851 | ## | A2M Alpha-2-macroglobulin precursor | SDIAPVAR                                    | 1 | 968.5524  | 2.394 | 0.035 |
| 137 | IPI00478003 | 1 | 74.1 | 0.77 | 0.13 | 851 | ## | A2M Alpha-2-macroglobulin precursor | FQVDNNNR                                    | 2 | 573.7862  | 2.269 | 0.042 |
| 137 | IPI00478003 | 1 | 74.1 | 0.77 | 0.13 | 851 | ## | A2M Alpha-2-macroglobulin precursor | AFTNSK                                      | 2 | 474.2691  | 2.184 | 0.117 |
| 137 | IPI00478003 | 1 | 74.1 | 0.77 | 0.13 | 851 | ## | A2M Alpha-2-macroglobulin precursor | n[145]ALLAYAFALAGNQDK[272]                  | 3 | 618.6836  | 1.971 | 0.133 |
| 137 | IPI00478003 | 1 | 74.1 | 0.77 | 0.13 | 851 | ## | A2M Alpha-2-macroglobulin precursor | VVVQKK                                      | 2 | 560.8819  | 2.011 | 0.16  |
| 137 | IPI00478003 | 1 | 74.1 | 0.77 | 0.13 | 851 | ## | A2M Alpha-2-macroglobulin precursor | VDSHFR                                      | 1 | 900.4687  | 1.824 | 0.075 |
| 137 | IPI00478003 | 1 | 74.1 | 0.77 | 0.13 | 851 | ## | A2M Alpha-2-macroglobulin precursor | n[145]VDSHFR                                | 2 | 452.7415  | 2.06  | 0.125 |
| 137 | IPI00478003 | 1 | 74.1 | 0.77 | 0.13 | 851 | ## | A2M Alpha-2-macroglobulin precursor | n[145]YM[147]VLVPSLLHTETTEK[272]            | 3 | 722.3971  | 4.156 | 0.28  |
| 137 | IPI00478003 | 1 | 74.1 | 0.77 | 0.13 | 851 | ## | A2M Alpha-2-macroglobulin precursor | VVVQK                                       | 2 | 426.7869  | 2.028 | 0.097 |
| 137 | IPI00478003 | 1 | 74.1 | 0.77 | 0.13 | 851 | ## | A2M Alpha-2-macroglobulin precursor | n[145]ITIALLEIPLTVTHPVVR                    | 3 | 710.4441  | 3.064 | 0.339 |
| 137 | IPI00478003 | 1 | 74.1 | 0.77 | 0.13 | 851 | ## | A2M Alpha-2-macroglobulin precursor | YM[147]VLVPSLLHTETTEK                       | 3 | 719.7257  | 4.026 | 0.285 |
| 137 | IPI00478003 | 1 | 74.1 | 0.77 | 0.13 | 851 | ## | A2M Alpha-2-macroglobulin precursor | n[145]VVVQK[272]                            | 2 | 430.794   | 2.001 | 0.115 |
| 137 | IPI00478003 | 1 | 74.1 | 0.77 | 0.13 | 851 | ## | A2M Alpha-2-macroglobulin precursor | n[145]LSFVK[272]VDSHFR                      | 4 | 406.4869  | 1.915 | 0.147 |
| 137 | IPI00478003 | 1 | 74.1 | 0.77 | 0.13 | 851 | ## | A2M Alpha-2-macroglobulin precursor | TTVMVK                                      | 2 | 479.7914  | 2.049 | 0.121 |
| 137 | IPI00478003 | 1 | 74.1 | 0.77 | 0.13 | 851 | ## | A2M Alpha-2-macroglobulin precursor | n[145]QQNAQGGFSSTQDTVVALHALSK[272]          | 4 | 669.6053  | 3.55  | 0.153 |
| 137 | IPI00478003 | 1 | 74.1 | 0.77 | 0.13 | 851 | ## | A2M Alpha-2-macroglobulin precursor | n[145]EYEMK[272]                            | 2 | 494.2566  | 1.826 | 0.175 |
| 137 | IPI00478003 | 1 | 74.1 | 0.77 | 0.13 | 851 | ## | A2M Alpha-2-macroglobulin precursor | LLLQQVSLPELPGEYSMK                          | 3 | 775.7678  | 2.814 | 0.033 |
| 137 | IPI00478003 | 1 | 74.1 | 0.77 | 0.13 | 851 | ## | A2M Alpha-2-macroglobulin precursor | TGTHGLLVK                                   | 2 | 603.3719  | 2.011 | 0.149 |
| 137 | IPI00478003 | 1 | 74.1 | 0.77 | 0.13 | 851 | ## | A2M Alpha-2-macroglobulin precursor | KEYEMK                                      | 2 | 624.3445  | 2.14  | 0.063 |
| 137 | IPI00478003 | 1 | 74.1 | 0.77 | 0.13 | 851 | ## | A2M Alpha-2-macroglobulin precursor | n[145]DMYSFLEDMGLK[272]                     | 3 | 579.6208  | 2.252 | 0.217 |
| 137 | IPI00478003 | 1 | 74.1 | 0.77 | 0.13 | 851 | ## | A2M Alpha-2-macroglobulin precursor | n[145]SFVHLEPM[147]SHELPCG                  | 3 | 630.2886  | 2.983 | 0.292 |
| 137 | IPI00478003 | 1 | 74.1 | 0.77 | 0.13 | 851 | ## | A2M Alpha-2-macroglobulin precursor | n[145]TGTHGLLVK[272]QEDM[147]K[272]         | 3 | 669.0419  | 2.218 | 0.251 |
| 137 | IPI00478003 | 1 | 74.1 | 0.77 | 0.13 | 851 | ## | A2M Alpha-2-macroglobulin precursor | n[145]AFTNSK[272]                           | 2 | 478.2762  | 1.986 | 0.087 |
| 137 | IPI00478003 | 1 | 74.1 | 0.77 | 0.13 | 851 | ## | A2M Alpha-2-macroglobulin precursor | TTVM[147]VK                                 | 2 | 487.7888  | 1.992 | 0.143 |
| 137 | IPI00478003 | 1 | 74.1 | 0.77 | 0.13 | 851 | ## | A2M Alpha-2-macroglobulin precursor | VDSHFR                                      | 2 | 450.738   | 1.968 | 0.107 |

|     |             |   |      |      |      |     |    |                                     |                                             |   |           |       |       |
|-----|-------------|---|------|------|------|-----|----|-------------------------------------|---------------------------------------------|---|-----------|-------|-------|
| 137 | IPI00478003 | 1 | 74.1 | 0.77 | 0.13 | 851 | ## | A2M Alpha-2-macroglobulin precursor | LLEIPLTVTHPVVR                              | 3 | 576.3575  | 3.201 | 0.273 |
| 137 | IPI00478003 | 1 | 74.1 | 0.77 | 0.13 | 851 | ## | A2M Alpha-2-macroglobulin precursor | n[145]VGFYESDVM[147]GR                      | 1 | 1419.6695 | 1.382 | 0.273 |
| 137 | IPI00478003 | 1 | 74.1 | 0.77 | 0.13 | 851 | ## | A2M Alpha-2-macroglobulin precursor | TKVFQLK                                     | 3 | 428.6115  | 2.301 | 0.168 |
| 137 | IPI00478003 | 1 | 74.1 | 0.77 | 0.13 | 851 | ## | A2M Alpha-2-macroglobulin precursor | n[145]ALLAYAFALAGNQDK[272]R                 | 3 | 670.7174  | 2.171 | 0.196 |
| 137 | IPI00478003 | 1 | 74.1 | 0.77 | 0.13 | 851 | ## | A2M Alpha-2-macroglobulin precursor | n[145]VDSHFR                                | 1 | 904.4758  | 1.669 | 0.064 |
| 137 | IPI00478003 | 1 | 74.1 | 0.77 | 0.13 | 851 | ## | A2M Alpha-2-macroglobulin precursor | SSEPFQGSYK                                  | 2 | 705.3567  | 3.74  | 0.402 |
| 137 | IPI00478003 | 1 | 74.1 | 0.77 | 0.13 | 851 | ## | A2M Alpha-2-macroglobulin precursor | n[145]DNSVHWERPQK[272]PK[272]               | 4 | 514.0381  | 2.587 | 0.076 |
| 137 | IPI00478003 | 1 | 74.1 | 0.77 | 0.13 | 851 | ## | A2M Alpha-2-macroglobulin precursor | n[145]PVPGHVTVSICR                          | 3 | 485.5958  | 2.96  | 0.269 |
| 137 | IPI00478003 | 1 | 74.1 | 0.77 | 0.13 | 851 | ## | A2M Alpha-2-macroglobulin precursor | M[147]VLVPSLLHTEK                           | 3 | 665.3712  | 3.404 | 0.246 |
| 137 | IPI00478003 | 1 | 74.1 | 0.77 | 0.13 | 851 | ## | A2M Alpha-2-macroglobulin precursor | n[145]FVELTM[147]PYSVIR                     | 2 | 807.9377  | 3.594 | 0.266 |
| 137 | IPI00478003 | 1 | 74.1 | 0.77 | 0.13 | 851 | ## | A2M Alpha-2-macroglobulin precursor | n[145]AVDQSVLLM[147]K[272]PDAELSASSVYNLLPEK | 4 | 842.2114  | 2.646 | 0.024 |
| 137 | IPI00478003 | 1 | 74.1 | 0.77 | 0.13 | 851 | ## | A2M Alpha-2-macroglobulin precursor | DNSVHWERPQK[272]PK                          | 2 | 1023.0617 | 2.511 | 0.11  |
| 137 | IPI00478003 | 1 | 74.1 | 0.77 | 0.13 | 851 | ## | A2M Alpha-2-macroglobulin precursor | GPTQEFKK                                    | 2 | 677.8958  | 2.144 | 0.088 |
| 137 | IPI00478003 | 1 | 74.1 | 0.77 | 0.13 | 851 | ## | A2M Alpha-2-macroglobulin precursor | VLVPSLLHTEK                                 | 2 | 924.0355  | 4.114 | 0.397 |
| 137 | IPI00478003 | 1 | 74.1 | 0.77 | 0.13 | 851 | ## | A2M Alpha-2-macroglobulin precursor | n[145]SSEPFQGSYK[272]                       | 2 | 709.3638  | 3.736 | 0.372 |
| 137 | IPI00478003 | 1 | 74.1 | 0.77 | 0.13 | 851 | ## | A2M Alpha-2-macroglobulin precursor | VLVPSLLHTEK                                 | 3 | 616.3594  | 2.973 | 0.257 |
| 137 | IPI00478003 | 1 | 74.1 | 0.77 | 0.13 | 851 | ## | A2M Alpha-2-macroglobulin precursor | LSFYylim[147]JAK                            | 2 | 772.9309  | 3.777 | 0.323 |
| 137 | IPI00478003 | 1 | 74.1 | 0.77 | 0.13 | 851 | ## | A2M Alpha-2-macroglobulin precursor | KDNSVHWER                                   | 3 | 484.2565  | 3.05  | 0.224 |
| 137 | IPI00478003 | 1 | 74.1 | 0.77 | 0.13 | 851 | ## | A2M Alpha-2-macroglobulin precursor | n[145]AFALAGNQDK[272]                       | 2 | 661.869   | 3.826 | 0.366 |
| 137 | IPI00478003 | 1 | 74.1 | 0.77 | 0.13 | 851 | ## | A2M Alpha-2-macroglobulin precursor | n[145]IAQWQSFQLEGLK                         | 2 | 945.0237  | 3.873 | 0.152 |
| 137 | IPI00478003 | 1 | 74.1 | 0.77 | 0.13 | 851 | ## | A2M Alpha-2-macroglobulin precursor | n[145]LTAQPAPTSSEDLTSATNIVK[272]            | 3 | 782.4316  | 2.998 | 0.324 |
| 137 | IPI00478003 | 1 | 74.1 | 0.77 | 0.13 | 851 | ## | A2M Alpha-2-macroglobulin precursor | n[145]FSGQLNSHG                             | 2 | 545.7735  | 2.749 | 0.449 |
| 137 | IPI00478003 | 1 | 74.1 | 0.77 | 0.13 | 851 | ## | A2M Alpha-2-macroglobulin precursor | n[145]NQGNTWLTAFLVK                         | 2 | 888.4999  | 3.914 | 0.225 |
| 137 | IPI00478003 | 1 | 74.1 | 0.77 | 0.13 | 851 | ## | A2M Alpha-2-macroglobulin precursor | n[145]TK[272]VFQLK[272]                     | 2 | 648.4242  | 2.788 | 0.085 |
| 137 | IPI00478003 | 1 | 74.1 | 0.77 | 0.13 | 851 | ## | A2M Alpha-2-macroglobulin precursor | n[145]TGTHGLLVK[272]                        | 3 | 405.2551  | 2.524 | 0.066 |
| 137 | IPI00478003 | 1 | 74.1 | 0.77 | 0.13 | 851 | ## | A2M Alpha-2-macroglobulin precursor | EYEMK                                       | 2 | 490.2495  | 1.712 | 0.086 |
| 137 | IPI00478003 | 1 | 74.1 | 0.77 | 0.13 | 851 | ## | A2M Alpha-2-macroglobulin precursor | n[145]FSFPLSSEPFQGSYK[272]                  | 2 | 1005.0166 | 4.62  | 0.364 |
| 137 | IPI00478003 | 1 | 74.1 | 0.77 | 0.13 | 851 | ## | A2M Alpha-2-macroglobulin precursor | TKVFQLK                                     | 2 | 642.4136  | 2.721 | 0.088 |
| 137 | IPI00478003 | 1 | 74.1 | 0.77 | 0.13 | 851 | ## | A2M Alpha-2-macroglobulin precursor | VTGEGCVYLQTSK                               | 3 | 608.6513  | 2.228 | 0.122 |
| 137 | IPI00478003 | 1 | 74.1 | 0.77 | 0.13 | 851 | ## | A2M Alpha-2-macroglobulin precursor | n[145]TITK[272]LSFVK[272]                   | 3 | 490.3203  | 2.559 | 0.11  |
| 137 | IPI00478003 | 1 | 74.1 | 0.77 | 0.13 | 851 | ## | A2M Alpha-2-macroglobulin precursor | n[145]GYLNTGYQR                             | 2 | 608.3156  | 3.515 | 0.388 |
| 137 | IPI00478003 | 1 | 74.1 | 0.77 | 0.13 | 851 | ## | A2M Alpha-2-macroglobulin precursor | ALLAYAFALAGNQDK                             | 3 | 616.0122  | 2.028 | 0.087 |
| 137 | IPI00478003 | 1 | 74.1 | 0.77 | 0.13 | 851 | ## | A2M Alpha-2-macroglobulin precursor | n[145]JGYLNTGYQR                            | 2 | 664.8576  | 2.38  | 0.226 |
| 137 | IPI00478003 | 1 | 74.1 | 0.77 | 0.13 | 851 | ## | A2M Alpha-2-macroglobulin precursor | n[145]VDLSFSPSQSLPASHAH                     | 3 | 641.9942  | 3.215 | 0.225 |
| 137 | IPI00478003 | 1 | 74.1 | 0.77 | 0.13 | 851 | ## | A2M Alpha-2-macroglobulin precursor | QLNYK                                       | 2 | 473.2795  | 1.725 | 0.097 |
| 137 | IPI00478003 | 1 | 74.1 | 0.77 | 0.13 | 851 | ## | A2M Alpha-2-macroglobulin precursor | n[145]TVSAEALSEQELCGTEVPSVPEHGR             | 3 | 939.1168  | 3.305 | 0.245 |
| 137 | IPI00478003 | 1 | 74.1 | 0.77 | 0.13 | 851 | ## | A2M Alpha-2-macroglobulin precursor | n[145]VVSMDENFHPLNELIPLVYIQD                | 2 | 1365.2025 | 3.398 | 0.356 |
| 137 | IPI00478003 | 1 | 74.1 | 0.77 | 0.13 | 851 | ## | A2M Alpha-2-macroglobulin precursor | n[145]FVELTMPYSVIR                          | 2 | 799.9403  | 3.516 | 0.329 |
| 137 | IPI00478003 | 1 | 74.1 | 0.77 | 0.13 | 851 | ## | A2M Alpha-2-macroglobulin precursor | n[145]VSGFIPLK[272]PTVK[272]                | 2 | 859.5507  | 2.916 | 0.469 |
| 137 | IPI00478003 | 1 | 74.1 | 0.77 | 0.13 | 851 | ## | A2M Alpha-2-macroglobulin precursor | n[145]LLIYAVLPTGDVIGDSAK[272]               | 3 | 711.7518  | 2.556 | 0.153 |
| 137 | IPI00478003 | 1 | 74.1 | 0.77 | 0.13 | 851 | ## | A2M Alpha-2-macroglobulin precursor | M[147]VSGFIPLKPTVK                          | 4 | 464.0325  | 1.742 | 0.022 |
| 137 | IPI00478003 | 1 | 74.1 | 0.77 | 0.13 | 851 | ## | A2M Alpha-2-macroglobulin precursor | n[145]GPTQEFK[272]K[272]R                   | 2 | 761.957   | 2.215 | 0.227 |
| 137 | IPI00478003 | 1 | 74.1 | 0.77 | 0.13 | 851 | ## | A2M Alpha-2-macroglobulin precursor | FVELTM[147]PYSVIR                           | 2 | 805.9342  | 2.746 | 0.284 |
| 137 | IPI00478003 | 1 | 74.1 | 0.77 | 0.13 | 851 | ## | A2M Alpha-2-macroglobulin precursor | n[145]FTVLQDVPVR                            | 2 | 659.386   | 2.797 | 0.307 |
| 137 | IPI00478003 | 1 | 74.1 | 0.77 | 0.13 | 851 | ## | A2M Alpha-2-macroglobulin precursor | LLHTEK                                      | 3 | 451.2575  | 2.397 | 0.261 |
| 137 | IPI00478003 | 1 | 74.1 | 0.77 | 0.13 | 851 | ## | A2M Alpha-2-macroglobulin precursor | VDLSFSPSQSLPASH                             | 2 | 856.4361  | 2.9   | 0.335 |
| 137 | IPI00478003 | 1 | 74.1 | 0.77 | 0.13 | 851 | ## | A2M Alpha-2-macroglobulin precursor | n[145]YESDVM[147]GR                         | 2 | 558.7592  | 2.22  | 0.384 |
| 137 | IPI00478003 | 1 | 74.1 | 0.77 | 0.13 | 851 | ## | A2M Alpha-2-macroglobulin precursor | SIYKPGQ                                     | 2 | 536.8112  | 2.002 | 0.384 |

|     |             |   |      |      |      |     |    |                                     |                                    |   |           |       |       |
|-----|-------------|---|------|------|------|-----|----|-------------------------------------|------------------------------------|---|-----------|-------|-------|
| 137 | IPI00478003 | 1 | 74.1 | 0.77 | 0.13 | 851 | ## | A2M Alpha-2-macroglobulin precursor | n[145]RK[272]EYEMK[272]            | 2 | 708.4057  | 2.021 | 0.116 |
| 137 | IPI00478003 | 1 | 74.1 | 0.77 | 0.13 | 851 | ## | A2M Alpha-2-macroglobulin precursor | n[145]SFVHLEPM[147]SHELPCGHTQTVQAH | 4 | 698.5772  | 3.5   | 0.173 |
| 137 | IPI00478003 | 1 | 74.1 | 0.77 | 0.13 | 851 | ## | A2M Alpha-2-macroglobulin precursor | n[145]DLK[272]PAIVK[272]           | 3 | 439.294   | 2.155 | 0.009 |
| 137 | IPI00478003 | 1 | 74.1 | 0.77 | 0.13 | 851 | ## | A2M Alpha-2-macroglobulin precursor | FVELTMPYSVIR                       | 2 | 797.9367  | 3.457 | 0.208 |
| 137 | IPI00478003 | 1 | 74.1 | 0.77 | 0.13 | 851 | ## | A2M Alpha-2-macroglobulin precursor | n[145]VVVQK[272]K[272]             | 2 | 566.8926  | 1.356 | 0.051 |
| 137 | IPI00478003 | 1 | 74.1 | 0.77 | 0.13 | 851 | ## | A2M Alpha-2-macroglobulin precursor | n[145]QLNYK[272]                   | 2 | 477.2866  | 1.602 | 0.005 |
| 137 | IPI00478003 | 1 | 74.1 | 0.77 | 0.13 | 851 | ## | A2M Alpha-2-macroglobulin precursor | n[145]SASNMAIVDVK[272]             | 3 | 474.9337  | 2.316 | 0.017 |
| 137 | IPI00478003 | 1 | 74.1 | 0.77 | 0.13 | 851 | ## | A2M Alpha-2-macroglobulin precursor | TGTHGLLVK                          | 3 | 402.5837  | 1.942 | 0.082 |
| 137 | IPI00478003 | 1 | 74.1 | 0.77 | 0.13 | 851 | ## | A2M Alpha-2-macroglobulin precursor | n[145]AGLISSTASLR                  | 2 | 638.8707  | 2.778 | 0.268 |
| 137 | IPI00478003 | 1 | 74.1 | 0.77 | 0.13 | 851 | ## | A2M Alpha-2-macroglobulin precursor | n[145]QLNYK[272]HYDGSYSTFGER       | 4 | 589.0418  | 2.525 | 0.188 |
| 137 | IPI00478003 | 1 | 74.1 | 0.77 | 0.13 | 851 | ## | A2M Alpha-2-macroglobulin precursor | SASNM[147]AIVDVK                   | 3 | 477.5939  | 1.837 | 0.087 |
| 137 | IPI00478003 | 1 | 74.1 | 0.77 | 0.13 | 851 | ## | A2M Alpha-2-macroglobulin precursor | n[145]SNM[147]AIVDVK[272]          | 2 | 640.8598  | 2.796 | 0.215 |
| 137 | IPI00478003 | 1 | 74.1 | 0.77 | 0.13 | 851 | ## | A2M Alpha-2-macroglobulin precursor | n[145]SLFTDLEAENDVLHCVAF           | 2 | 1107.0224 | 3.947 | 0.387 |
| 137 | IPI00478003 | 1 | 74.1 | 0.77 | 0.13 | 851 | ## | A2M Alpha-2-macroglobulin precursor | LLHTETTEK                          | 2 | 676.3827  | 2.554 | 0.278 |
| 137 | IPI00478003 | 1 | 74.1 | 0.77 | 0.13 | 851 | ## | A2M Alpha-2-macroglobulin precursor | FIPLKPTVK                          | 2 | 731.9791  | 1.951 | 0.3   |
| 137 | IPI00478003 | 1 | 74.1 | 0.77 | 0.13 | 851 | ## | A2M Alpha-2-macroglobulin precursor | n[145]ETTFNSLLCPSGGEVSEELSK[272]   | 3 | 892.1113  | 2.118 | 0.118 |
| 137 | IPI00478003 | 1 | 74.1 | 0.77 | 0.13 | 851 | ## | A2M Alpha-2-macroglobulin precursor | n[145]LK[272]PAIVK[272]            | 2 | 600.9239  | 2.228 | 0.263 |
| 137 | IPI00478003 | 1 | 74.1 | 0.77 | 0.13 | 851 | ## | A2M Alpha-2-macroglobulin precursor | n[145]FSGQLNSH                     | 2 | 517.2628  | 2.497 | 0.217 |
| 137 | IPI00478003 | 1 | 74.1 | 0.77 | 0.13 | 851 | ## | A2M Alpha-2-macroglobulin precursor | n[145]SIYK[272]PGQ                 | 2 | 540.8183  | 1.877 | 0.309 |
| 137 | IPI00478003 | 1 | 74.1 | 0.77 | 0.13 | 851 | ## | A2M Alpha-2-macroglobulin precursor | n[145]EVSEELSK[272]                | 2 | 661.3763  | 2.602 | 0.269 |
| 137 | IPI00478003 | 1 | 74.1 | 0.77 | 0.13 | 851 | ## | A2M Alpha-2-macroglobulin precursor | GPTQEFKKR                          | 2 | 755.9463  | 2.267 | 0.201 |
| 137 | IPI00478003 | 1 | 74.1 | 0.77 | 0.13 | 851 | ## | A2M Alpha-2-macroglobulin precursor | n[145]TEVSSNHVLIY                  | 2 | 703.3758  | 2.49  | 0.301 |
| 137 | IPI00478003 | 1 | 74.1 | 0.77 | 0.13 | 851 | ## | A2M Alpha-2-macroglobulin precursor | HVLIYLDK                           | 2 | 640.8899  | 3.014 | 0.126 |
| 137 | IPI00478003 | 1 | 74.1 | 0.77 | 0.13 | 851 | ## | A2M Alpha-2-macroglobulin precursor | n[145]FSGQLNSHGC                   | 2 | 620.272   | 2.339 | 0.297 |
| 137 | IPI00478003 | 1 | 74.1 | 0.77 | 0.13 | 851 | ## | A2M Alpha-2-macroglobulin precursor | n[145]APVGHFYEQAPSAEEMTSY          | 2 | 1227.5738 | 3.414 | 0.264 |
| 137 | IPI00478003 | 1 | 74.1 | 0.77 | 0.13 | 851 | ## | A2M Alpha-2-macroglobulin precursor | RKEYEMK                            | 2 | 702.3951  | 2.298 | 0.116 |
| 137 | IPI00478003 | 1 | 74.1 | 0.77 | 0.13 | 851 | ## | A2M Alpha-2-macroglobulin precursor | n[145]FEVQVTVPK                    | 2 | 665.8962  | 1.822 | 0.021 |
| 137 | IPI00478003 | 1 | 74.1 | 0.77 | 0.13 | 851 | ## | A2M Alpha-2-macroglobulin precursor | n[145]SFVHLEPM[147]SHELPC          | 3 | 611.2814  | 2.286 | 0.234 |
| 137 | IPI00478003 | 1 | 74.1 | 0.77 | 0.13 | 851 | ## | A2M Alpha-2-macroglobulin precursor | ALLAYAF                            | 2 | 454.7657  | 1.983 | 0.287 |
| 137 | IPI00478003 | 1 | 74.1 | 0.77 | 0.13 | 851 | ## | A2M Alpha-2-macroglobulin precursor | n[145]SASNM[147]AIVDVK[272]        | 3 | 480.2653  | 1.961 | 0.032 |
| 137 | IPI00478003 | 1 | 74.1 | 0.77 | 0.13 | 851 | ## | A2M Alpha-2-macroglobulin precursor | n[145]VSGFIPLK[272]PTVK[272]       | 3 | 573.3696  | 2.821 | 0.167 |
| 137 | IPI00478003 | 1 | 74.1 | 0.77 | 0.13 | 851 | ## | A2M Alpha-2-macroglobulin precursor | DNSVHWERPQK[272]PK                 | 4 | 512.0345  | 2.051 | 0.03  |
| 137 | IPI00478003 | 1 | 74.1 | 0.77 | 0.13 | 851 | ## | A2M Alpha-2-macroglobulin precursor | n[145]NQGNTWLTAFLK                 | 3 | 592.669   | 2.126 | 0.115 |
| 137 | IPI00478003 | 1 | 74.1 | 0.77 | 0.13 | 851 | ## | A2M Alpha-2-macroglobulin precursor | TITKLSFVK                          | 2 | 728.9662  | 2.056 | 0.277 |
| 137 | IPI00478003 | 1 | 74.1 | 0.77 | 0.13 | 851 | ## | A2M Alpha-2-macroglobulin precursor | n[145]LSVSYTGSR                    | 2 | 557.3047  | 2.431 | 0.266 |
| 137 | IPI00478003 | 1 | 74.1 | 0.77 | 0.13 | 851 | ## | A2M Alpha-2-macroglobulin precursor | n[145]TVLQDVPVR                    | 2 | 585.8518  | 2.304 | 0.235 |
| 137 | IPI00478003 | 1 | 74.1 | 0.77 | 0.13 | 851 | ## | A2M Alpha-2-macroglobulin precursor | n[145]EQAPHICAN                    | 2 | 661.2675  | 2.337 | 0.238 |
| 137 | IPI00478003 | 1 | 74.1 | 0.77 | 0.13 | 851 | ## | A2M Alpha-2-macroglobulin precursor | RKEYEMK                            | 4 | 351.7012  | 1.948 | 0.116 |
| 137 | IPI00478003 | 1 | 74.1 | 0.77 | 0.13 | 851 | ## | A2M Alpha-2-macroglobulin precursor | n[145]SFYYLIM[147]AK[272]          | 2 | 720.396   | 2.494 | 0.237 |
| 137 | IPI00478003 | 1 | 74.1 | 0.77 | 0.13 | 851 | ## | A2M Alpha-2-macroglobulin precursor | VYDYYETDEFAIEYNAPCSK               | 3 | 939.7523  | 1.693 | 0.053 |
| 137 | IPI00478003 | 1 | 74.1 | 0.77 | 0.13 | 851 | ## | A2M Alpha-2-macroglobulin precursor | LSFVKVDShFR                        | 3 | 538.9754  | 2.395 | 0.044 |
| 137 | IPI00478003 | 1 | 74.1 | 0.77 | 0.13 | 851 | ## | A2M Alpha-2-macroglobulin precursor | n[145]GTEVPSVPEHGR                 | 3 | 470.2482  | 2.699 | 0.147 |
| 137 | IPI00478003 | 1 | 74.1 | 0.77 | 0.13 | 851 | ## | A2M Alpha-2-macroglobulin precursor | FSGQLNSH                           | 2 | 515.2593  | 2.537 | 0.147 |
| 137 | IPI00478003 | 1 | 74.1 | 0.77 | 0.13 | 851 | ## | A2M Alpha-2-macroglobulin precursor | M[147]VSGFIPLK                     | 2 | 644.3783  | 2.288 | 0.258 |
| 137 | IPI00478003 | 1 | 74.1 | 0.77 | 0.13 | 851 | ## | A2M Alpha-2-macroglobulin precursor | n[145]GIPFFGQVR                    | 2 | 582.836   | 2.391 | 0.204 |
| 137 | IPI00478003 | 1 | 74.1 | 0.77 | 0.13 | 851 | ## | A2M Alpha-2-macroglobulin precursor | n[145]TM[147]PYSVIR                | 2 | 563.806   | 2.066 | 0.244 |
| 137 | IPI00478003 | 1 | 74.1 | 0.77 | 0.13 | 851 | ## | A2M Alpha-2-macroglobulin precursor | n[145]PVPGHVTVSICR                 | 2 | 727.8901  | 2.019 | 0.177 |
| 137 | IPI00478003 | 1 | 74.1 | 0.77 | 0.13 | 851 | ## | A2M Alpha-2-macroglobulin precursor | n[145]GFIPLK[272]PTVK[272]         | 3 | 511.3361  | 1.821 | 0.239 |



|     |             |   |      |      |      |     |    |                                     |                                |   |          |       |       |
|-----|-------------|---|------|------|------|-----|----|-------------------------------------|--------------------------------|---|----------|-------|-------|
| 137 | IPI00478003 | 1 | 74.1 | 0.77 | 0.13 | 851 | ## | A2M Alpha-2-macroglobulin precursor | SNM[147]AIVDVK                 | 2 | 636.8527 | 2.447 | 0.183 |
| 137 | IPI00478003 | 1 | 74.1 | 0.77 | 0.13 | 851 | ## | A2M Alpha-2-macroglobulin precursor | n[145]TITK[272]LSFVK[272]      | 2 | 734.9768 | 1.699 | 0.132 |
| 137 | IPI00478003 | 1 | 74.1 | 0.77 | 0.13 | 851 | ## | A2M Alpha-2-macroglobulin precursor | TVLQDVPVR                      | 2 | 583.8482 | 2.152 | 0.252 |
| 137 | IPI00478003 | 1 | 74.1 | 0.77 | 0.13 | 851 | ## | A2M Alpha-2-macroglobulin precursor | VNYKDR                         | 2 | 537.8064 | 1.831 | 0.028 |
| 137 | IPI00478003 | 1 | 74.1 | 0.77 | 0.13 | 851 | ## | A2M Alpha-2-macroglobulin precursor | ALAGNQDK                       | 2 | 548.8091 | 2.576 | 0.154 |
| 137 | IPI00478003 | 1 | 74.1 | 0.77 | 0.13 | 851 | ## | A2M Alpha-2-macroglobulin precursor | n[145]EYEM[147]K[272]          | 2 | 502.2541 | 1.265 | 0.003 |
| 137 | IPI00478003 | 1 | 74.1 | 0.77 | 0.13 | 851 | ## | A2M Alpha-2-macroglobulin precursor | n[145]FSGQLNSHGCF              | 2 | 693.8062 | 2.418 | 0.193 |
| 137 | IPI00478003 | 1 | 74.1 | 0.77 | 0.13 | 851 | ## | A2M Alpha-2-macroglobulin precursor | n[145]LNTGYQR                  | 2 | 498.2732 | 2.432 | 0.107 |
| 137 | IPI00478003 | 1 | 74.1 | 0.77 | 0.13 | 851 | ## | A2M Alpha-2-macroglobulin precursor | IPLKPTVK                       | 2 | 658.4449 | 1.879 | 0.24  |
| 137 | IPI00478003 | 1 | 74.1 | 0.77 | 0.13 | 851 | ## | A2M Alpha-2-macroglobulin precursor | n[145]CPQLQYEMHGPEGLR          | 3 | 692.6576 | 2.507 | 0.162 |
| 137 | IPI00478003 | 1 | 74.1 | 0.77 | 0.13 | 851 | ## | A2M Alpha-2-macroglobulin precursor | SVSYTGSR                       | 2 | 498.7591 | 1.852 | 0.243 |
| 137 | IPI00478003 | 1 | 74.1 | 0.77 | 0.13 | 851 | ## | A2M Alpha-2-macroglobulin precursor | FIPLKPTVK                      | 3 | 488.3218 | 1.843 | 0.206 |
| 137 | IPI00478003 | 1 | 74.1 | 0.77 | 0.13 | 851 | ## | A2M Alpha-2-macroglobulin precursor | YYLIM[147]AK                   | 2 | 599.3387 | 1.837 | 0.233 |
| 137 | IPI00478003 | 1 | 74.1 | 0.77 | 0.13 | 851 | ## | A2M Alpha-2-macroglobulin precursor | n[145]YLVNTGYQR                | 2 | 579.8048 | 2.262 | 0.156 |
| 137 | IPI00478003 | 1 | 74.1 | 0.77 | 0.13 | 851 | ## | A2M Alpha-2-macroglobulin precursor | LKPAIVK                        | 3 | 396.9446 | 2.98  | 0.033 |
| 137 | IPI00478003 | 1 | 74.1 | 0.77 | 0.13 | 851 | ## | A2M Alpha-2-macroglobulin precursor | YMLVPSLLHTETTEK                | 3 | 714.394  | 3.231 | 0.156 |
| 137 | IPI00478003 | 1 | 74.1 | 0.77 | 0.13 | 851 | ## | A2M Alpha-2-macroglobulin precursor | n[145]TMPYSVIR                 | 2 | 555.8085 | 2.107 | 0.14  |
| 137 | IPI00478003 | 1 | 74.1 | 0.77 | 0.13 | 851 | ## | A2M Alpha-2-macroglobulin precursor | n[145]PNVVEESAR                | 2 | 572.8076 | 2.455 | 0.097 |
| 137 | IPI00478003 | 1 | 74.1 | 0.77 | 0.13 | 851 | ## | A2M Alpha-2-macroglobulin precursor | SGGRTEHPFTVEEFVLPK             | 3 | 770.7462 | 3.342 | 0.143 |
| 137 | IPI00478003 | 1 | 74.1 | 0.77 | 0.13 | 851 | ## | A2M Alpha-2-macroglobulin precursor | n[145]FIPLK[272]PTVK[272]      | 2 | 737.9898 | 2.539 | 0.209 |
| 137 | IPI00478003 | 1 | 74.1 | 0.77 | 0.13 | 851 | ## | A2M Alpha-2-macroglobulin precursor | AVDQSULLM[147]KPDALSSAVYNLLPEK | 4 | 839.2061 | 2.534 | 0.033 |
| 137 | IPI00478003 | 1 | 74.1 | 0.77 | 0.13 | 851 | ## | A2M Alpha-2-macroglobulin precursor | n[145]IPLK[272]PTVK[272]       | 2 | 664.4555 | 1.94  | 0.175 |
| 137 | IPI00478003 | 1 | 74.1 | 0.77 | 0.13 | 851 | ## | A2M Alpha-2-macroglobulin precursor | KEYEM[147]K                    | 3 | 421.8971 | 1.385 | 0.042 |
| 137 | IPI00478003 | 1 | 74.1 | 0.77 | 0.13 | 851 | ## | A2M Alpha-2-macroglobulin precursor | n[145]DNSVHWERPQKPK            | 4 | 512.0345 | 2.327 | 0.08  |
| 137 | IPI00478003 | 1 | 74.1 | 0.77 | 0.13 | 851 | ## | A2M Alpha-2-macroglobulin precursor | RKEYEM[147]K                   | 2 | 710.3925 | 1.696 | 0.055 |
| 137 | IPI00478003 | 1 | 74.1 | 0.77 | 0.13 | 851 | ## | A2M Alpha-2-macroglobulin precursor | n[145]VLVPSLLHTETTEK[272]      | 3 | 619.0308 | 2.716 | 0.099 |
| 137 | IPI00478003 | 1 | 74.1 | 0.77 | 0.13 | 851 | ## | A2M Alpha-2-macroglobulin precursor | n[145]LVHVEEPHTETVR            | 4 | 423.2315 | 1.959 | 0.058 |
| 137 | IPI00478003 | 1 | 74.1 | 0.77 | 0.13 | 851 | ## | A2M Alpha-2-macroglobulin precursor | n[145]SVSYTGSR                 | 2 | 500.7626 | 2.147 | 0.099 |
| 137 | IPI00478003 | 1 | 74.1 | 0.77 | 0.13 | 851 | ## | A2M Alpha-2-macroglobulin precursor | n[145]TQEFK[272]K[272]         | 2 | 606.8693 | 2.049 | 0.084 |
| 137 | IPI00478003 | 1 | 74.1 | 0.77 | 0.13 | 851 | ## | A2M Alpha-2-macroglobulin precursor | n[145]QLEGGLK[272]             | 2 | 516.8183 | 2.208 | 0.109 |
| 137 | IPI00478003 | 1 | 74.1 | 0.77 | 0.13 | 851 | ## | A2M Alpha-2-macroglobulin precursor | LKPAIVK                        | 2 | 594.9132 | 1.839 | 0.153 |
| 137 | IPI00478003 | 1 | 74.1 | 0.77 | 0.13 | 851 | ## | A2M Alpha-2-macroglobulin precursor | n[145]SFVHLEPM[147]SHELPCGH    | 3 | 675.9749 | 2.337 | 0.154 |
| 137 | IPI00478003 | 1 | 74.1 | 0.77 | 0.13 | 851 | ## | A2M Alpha-2-macroglobulin precursor | n[145]APVGHFYEPQAPSAEVEMTSY    | 3 | 818.7183 | 2.558 | 0.13  |
| 137 | IPI00478003 | 1 | 74.1 | 0.77 | 0.13 | 851 | ## | A2M Alpha-2-macroglobulin precursor | KLSFYYLIM[147]                 | 2 | 737.4124 | 1.736 | 0.266 |
| 137 | IPI00478003 | 1 | 74.1 | 0.77 | 0.13 | 851 | ## | A2M Alpha-2-macroglobulin precursor | NALFCLESARK[272]               | 3 | 537.943  | 2.384 | 0.006 |
| 137 | IPI00478003 | 1 | 74.1 | 0.77 | 0.13 | 851 | ## | A2M Alpha-2-macroglobulin precursor | n[145]YNILPEK[272]             | 2 | 582.847  | 2.486 | 0.138 |
| 137 | IPI00478003 | 1 | 74.1 | 0.77 | 0.13 | 851 | ## | A2M Alpha-2-macroglobulin precursor | YNLLPEK                        | 2 | 578.8399 | 2.385 | 0.082 |
| 137 | IPI00478003 | 1 | 74.1 | 0.77 | 0.13 | 851 | ## | A2M Alpha-2-macroglobulin precursor | n[145]HYDGSYSTFGE              | 2 | 703.8027 | 1.999 | 0.172 |
| 137 | IPI00478003 | 1 | 74.1 | 0.77 | 0.13 | 851 | ## | A2M Alpha-2-macroglobulin precursor | n[145]SFVHLEPMSEHELPCGHTQTVQAH | 4 | 694.5785 | 2.873 | 0.057 |
| 137 | IPI00478003 | 1 | 74.1 | 0.77 | 0.13 | 851 | ## | A2M Alpha-2-macroglobulin precursor | n[145]VTVSICR                  | 2 | 484.2629 | 1.981 | 0.073 |
| 137 | IPI00478003 | 1 | 74.1 | 0.77 | 0.13 | 851 | ## | A2M Alpha-2-macroglobulin precursor | n[145]TQEFK[272]K[272]         | 3 | 404.9153 | 2.084 | 0.079 |
| 137 | IPI00478003 | 1 | 74.1 | 0.77 | 0.13 | 851 | ## | A2M Alpha-2-macroglobulin precursor | SFVHLEPM[147]                  | 2 | 558.2814 | 1.689 | 0.17  |
| 137 | IPI00478003 | 1 | 74.1 | 0.77 | 0.13 | 851 | ## | A2M Alpha-2-macroglobulin precursor | HYDGSYSTFGE                    | 2 | 701.7991 | 1.601 | 0.229 |
| 137 | IPI00478003 | 1 | 74.1 | 0.77 | 0.13 | 851 | ## | A2M Alpha-2-macroglobulin precursor | VLLAYLTAQPAPTSDELTSATNIVK      | 3 | 966.2059 | 3.037 | 0.13  |
| 137 | IPI00478003 | 1 | 74.1 | 0.77 | 0.13 | 851 | ## | A2M Alpha-2-macroglobulin precursor | n[145]TQEFK[272]               | 2 | 470.7708 | 1.775 | 0.07  |
| 137 | IPI00478003 | 1 | 74.1 | 0.77 | 0.13 | 851 | ## | A2M Alpha-2-macroglobulin precursor | RKEYEMK                        | 3 | 468.5991 | 1.99  | 0.052 |
| 137 | IPI00478003 | 1 | 74.1 | 0.77 | 0.13 | 851 | ## | A2M Alpha-2-macroglobulin precursor | n[145]CICANGR                  | 2 | 486.7038 | 1.616 | 0.161 |
| 137 | IPI00478003 | 1 | 74.1 | 0.77 | 0.13 | 851 | ## | A2M Alpha-2-macroglobulin precursor | n[145]AFQPFVEL                 | 2 | 621.338  | 2.101 | 0.048 |

|     |             |   |      |      |      |     |    |                                             |                                           |   |           |       |       |
|-----|-------------|---|------|------|------|-----|----|---------------------------------------------|-------------------------------------------|---|-----------|-------|-------|
| 137 | IPI00478003 | 1 | 74.1 | 0.77 | 0.13 | 851 | ## | A2M Alpha-2-macroglobulin precursor         | n[145]ALLEIPLTVTHPVVR                     | 3 | 639.0669  | 3.252 | 0.245 |
| 137 | IPI00478003 | 1 | 74.1 | 0.77 | 0.13 | 851 | ## | A2M Alpha-2-macroglobulin precursor         | n[145]NQGNWTWLTAF                         | 2 | 648.3287  | 2.02  | 0.284 |
| 137 | IPI00478003 | 1 | 74.1 | 0.77 | 0.13 | 851 | ## | A2M Alpha-2-macroglobulin precursor         | FVELTMPYSVIR                              | 3 | 532.2936  | 2.128 | 0.093 |
| 137 | IPI00478003 | 1 | 74.1 | 0.77 | 0.13 | 851 | ## | A2M Alpha-2-macroglobulin precursor         | n[145]ALLAYAF                             | 2 | 456.7692  | 1.824 | 0.061 |
| 137 | IPI00478003 | 1 | 74.1 | 0.77 | 0.13 | 851 | ## | A2M Alpha-2-macroglobulin precursor         | LSVSYTGSR                                 | 2 | 555.3011  | 2.07  | 0.071 |
| 137 | IPI00478003 | 1 | 74.1 | 0.77 | 0.13 | 851 | ## | A2M Alpha-2-macroglobulin precursor         | n[145]SIYK[272]PG                         | 2 | 476.789   | 1.742 | 0.081 |
| 137 | IPI00478003 | 1 | 74.1 | 0.77 | 0.13 | 851 | ## | A2M Alpha-2-macroglobulin precursor         | n[145]QFSFPLSSEPFQG                       | 2 | 807.8997  | 2.255 | 0.031 |
| 137 | IPI00478003 | 1 | 74.1 | 0.77 | 0.13 | 851 | ## | A2M Alpha-2-macroglobulin precursor         | n[145]SFVHLEPMSHELPC                      | 3 | 605.9498  | 1.801 | 0.157 |
| 137 | IPI00478003 | 1 | 74.1 | 0.77 | 0.13 | 851 | ## | A2M Alpha-2-macroglobulin precursor         | n[145]SFQLEGGLK[272]                      | 2 | 633.8685  | 1.98  | 0.034 |
| 137 | IPI00478003 | 1 | 74.1 | 0.77 | 0.13 | 851 | ## | A2M Alpha-2-macroglobulin precursor         | n[145]SFVHLEPMSHELPCG                     | 3 | 624.9569  | 2.505 | 0.051 |
| 137 | IPI00478003 | 1 | 74.1 | 0.77 | 0.13 | 851 | ## | A2M Alpha-2-macroglobulin precursor         | ALLAYAF                                   | 1 | 908.5241  | 1.559 | 0.282 |
| 137 | IPI00478003 | 1 | 74.1 | 0.77 | 0.13 | 851 | ## | A2M Alpha-2-macroglobulin precursor         | n[145]SFVHLEPM[147]                       | 2 | 560.2849  | 1.622 | 0.177 |
| 137 | IPI00478003 | 1 | 74.1 | 0.77 | 0.13 | 851 | ## | A2M Alpha-2-macroglobulin precursor         | n[145]GK[272]PQYM[147]VLVPSLLHTETTEK[272] | 4 | 680.6321  | 2.633 | 0.17  |
| 137 | IPI00478003 | 1 | 74.1 | 0.77 | 0.13 | 851 | ## | A2M Alpha-2-macroglobulin precursor         | TQEFKK                                    | 2 | 600.8587  | 1.911 | 0.008 |
| 137 | IPI00478003 | 1 | 74.1 | 0.77 | 0.13 | 851 | ## | A2M Alpha-2-macroglobulin precursor         | n[145]AFQPF                               | 1 | 753.4052  | 1.648 | 0.137 |
| 137 | IPI00478003 | 1 | 74.1 | 0.77 | 0.13 | 851 | ## | A2M Alpha-2-macroglobulin precursor         | HYDGSYSTFG                                | 2 | 637.2779  | 1.93  | 0.158 |
| 137 | IPI00478003 | 1 | 74.1 | 0.77 | 0.13 | 851 | ## | A2M Alpha-2-macroglobulin precursor         | YILNGGTLLGLK                              | 3 | 514.652   | 2.005 | 0.096 |
| 137 | IPI00478003 | 1 | 74.1 | 0.77 | 0.13 | 851 | ## | A2M Alpha-2-macroglobulin precursor         | n[145]TPVSSSTNEK[272]                     | 2 | 625.8452  | 1.763 | 0.051 |
| 137 | IPI00478003 | 1 | 74.1 | 0.77 | 0.13 | 851 | ## | A2M Alpha-2-macroglobulin precursor         | DTVIKPL                                   | 2 | 533.337   | 1.613 | 0.059 |
| 137 | IPI00478003 | 1 | 74.1 | 0.77 | 0.13 | 851 | ## | A2M Alpha-2-macroglobulin precursor         | AFQPF                                     | 1 | 749.3981  | 1.518 | 0.155 |
| 137 | IPI00478003 | 1 | 74.1 | 0.77 | 0.13 | 851 | ## | A2M Alpha-2-macroglobulin precursor         | n[145]ALLAYAF                             | 1 | 912.5312  | 1.571 | 0.199 |
| 137 | IPI00478003 | 1 | 74.1 | 0.77 | 0.13 | 851 | ## | A2M Alpha-2-macroglobulin precursor         | n[145]FIPLK[272]PTVK[272]                 | 3 | 492.3289  | 2.151 | 0.005 |
| 137 | IPI00478003 | 1 | 74.1 | 0.77 | 0.13 | 851 | ## | A2M Alpha-2-macroglobulin precursor         | EM[147]K                                  | 1 | 703.3808  | 1.121 | 0.072 |
| 137 | IPI00478003 | 1 | 74.1 | 0.77 | 0.13 | 851 | ## | A2M Alpha-2-macroglobulin precursor         | RKDTVIK                                   | 2 | 640.4141  | 1.645 | 0.035 |
| 138 | IPI00479116 | 1 | 9.2  | 0.77 | 0.03 | 15  | 11 | CPN2 Carboxypeptidase N subunit 2 precursor | n[145]LSNNALSGLPQGVFGK[272]               | 2 | 945.538   | 4.973 | 0.521 |
| 138 | IPI00479116 | 1 | 9.2  | 0.77 | 0.03 | 15  | 11 | CPN2 Carboxypeptidase N subunit 2 precursor | n[145]LSNNALSGLPQGVFGK[272]               | 3 | 630.6944  | 3.956 | 0.282 |
| 138 | IPI00479116 | 1 | 9.2  | 0.77 | 0.03 | 15  | 11 | CPN2 Carboxypeptidase N subunit 2 precursor | GQVVPALNEK                                | 2 | 667.8932  | 3.233 | 0.382 |
| 138 | IPI00479116 | 1 | 9.2  | 0.77 | 0.03 | 15  | 11 | CPN2 Carboxypeptidase N subunit 2 precursor | n[145]GQVVPALNEK[272]                     | 2 | 671.9003  | 3.265 | 0.334 |
| 138 | IPI00479116 | 1 | 9.2  | 0.77 | 0.03 | 15  | 11 | CPN2 Carboxypeptidase N subunit 2 precursor | LSNNALSGLPQGVFGK                          | 2 | 941.5309  | 3.603 | 0.461 |
| 138 | IPI00479116 | 1 | 9.2  | 0.77 | 0.03 | 15  | 11 | CPN2 Carboxypeptidase N subunit 2 precursor | n[145]LEILSISK[272]                       | 2 | 595.8836  | 2.723 | 0.111 |
| 138 | IPI00479116 | 1 | 9.2  | 0.77 | 0.03 | 15  | 11 | CPN2 Carboxypeptidase N subunit 2 precursor | LSNNALSGLPQGVFGK                          | 3 | 628.023   | 2.955 | 0.071 |
| 138 | IPI00479116 | 1 | 9.2  | 0.77 | 0.03 | 15  | 11 | CPN2 Carboxypeptidase N subunit 2 precursor | LEILSISK                                  | 2 | 591.8765  | 2.187 | 0.107 |
| 138 | IPI00479116 | 1 | 9.2  | 0.77 | 0.03 | 15  | 11 | CPN2 Carboxypeptidase N subunit 2 precursor | DLEELVK                                   | 2 | 563.3294  | 2.153 | 0.05  |
| 138 | IPI00479116 | 1 | 9.2  | 0.77 | 0.03 | 15  | 11 | CPN2 Carboxypeptidase N subunit 2 precursor | n[145]QLVCPVTR                            | 2 | 553.3026  | 1.944 | 0.025 |
| 138 | IPI00479116 | 1 | 9.2  | 0.77 | 0.03 | 15  | 11 | CPN2 Carboxypeptidase N subunit 2 precursor | n[145]VLPAGLFAH                           | 2 | 534.8198  | 2.532 | 0.351 |
| 139 | IPI00550991 | 1 | 52.7 | 0.66 | 0.07 | 129 | 71 | SERPINA3 Alpha-1-antichymotrypsin precursor | ADLSGITGAR                                | 1 | 1100.6059 | 3.215 | 0.435 |
| 139 | IPI00550991 | 1 | 52.7 | 0.66 | 0.07 | 129 | 71 | SERPINA3 Alpha-1-antichymotrypsin precursor | n[145]ADLSGITGAR                          | 1 | 1104.613  | 2.977 | 0.311 |
| 139 | IPI00550991 | 1 | 52.7 | 0.66 | 0.07 | 129 | 71 | SERPINA3 Alpha-1-antichymotrypsin precursor | AVLDVFEEGTEASAATAVK                       | 2 | 1094.5785 | 6.621 | 0.586 |
| 139 | IPI00550991 | 1 | 52.7 | 0.66 | 0.07 | 129 | 71 | SERPINA3 Alpha-1-antichymotrypsin precursor | DEELSCTVVELK                              | 2 | 845.9232  | 4.841 | 0.422 |
| 139 | IPI00550991 | 1 | 52.7 | 0.66 | 0.07 | 129 | 71 | SERPINA3 Alpha-1-antichymotrypsin precursor | LYGSEAFATDFQDSAAAK                        | 2 | 1086.5341 | 5.596 | 0.634 |
| 139 | IPI00550991 | 1 | 52.7 | 0.66 | 0.07 | 129 | 71 | SERPINA3 Alpha-1-antichymotrypsin precursor | NLAVSQVVHK                                | 2 | 687.9145  | 4.141 | 0.378 |
| 139 | IPI00550991 | 1 | 52.7 | 0.66 | 0.07 | 129 | 71 | SERPINA3 Alpha-1-antichymotrypsin precursor | VLVNYIFFK                                 | 2 | 711.9291  | 3.836 | 0.382 |
| 139 | IPI00550991 | 1 | 52.7 | 0.66 | 0.07 | 129 | 71 | SERPINA3 Alpha-1-antichymotrypsin precursor | n[145]AVLDVFEEGTEASAATAVK[272]            | 2 | 1098.5856 | 7.041 | 0.605 |
| 139 | IPI00550991 | 1 | 52.7 | 0.66 | 0.07 | 129 | 71 | SERPINA3 Alpha-1-antichymotrypsin precursor | n[145]FRDEELSCTVVELK[272]                 | 2 | 1001.515  | 4.74  | 0.439 |
| 139 | IPI00550991 | 1 | 52.7 | 0.66 | 0.07 | 129 | 71 | SERPINA3 Alpha-1-antichymotrypsin precursor | n[145]LYGSEAFATDFQDSAAAK[272]             | 2 | 1090.5412 | 7.292 | 0.601 |
| 139 | IPI00550991 | 1 | 52.7 | 0.66 | 0.07 | 129 | 71 | SERPINA3 Alpha-1-antichymotrypsin precursor | n[145]NSPLDEENLTQENQDR                    | 2 | 1023.4783 | 5.158 | 0.482 |
| 139 | IPI00550991 | 1 | 52.7 | 0.66 | 0.07 | 129 | 71 | SERPINA3 Alpha-1-antichymotrypsin precursor | n[145]HPNSPLDEENLTQENQDR                  | 3 | 760.6918  | 5.583 | 0.396 |
| 139 | IPI00550991 | 1 | 52.7 | 0.66 | 0.07 | 129 | 71 | SERPINA3 Alpha-1-antichymotrypsin precursor | n[145]WEMPFDPQDTHQSR                      | 3 | 639.9605  | 3.65  | 0.49  |

|     |             |   |      |      |      |     |    |                                             |                                        |   |           |       |       |
|-----|-------------|---|------|------|------|-----|----|---------------------------------------------|----------------------------------------|---|-----------|-------|-------|
| 139 | IPI00550991 | 1 | 52.7 | 0.66 | 0.07 | 129 | 71 | SERPINA3 Alpha-1-antichymotrypsin precursor | KLINDYVK                               | 3 | 471.6257  | 3.073 | 0.094 |
| 139 | IPI00550991 | 1 | 52.7 | 0.66 | 0.07 | 129 | 71 | SERPINA3 Alpha-1-antichymotrypsin precursor | n[145]LYGSEAFATDFQDSAAAK[272]          | 3 | 727.3632  | 2.43  | 0.117 |
| 139 | IPI00550991 | 1 | 52.7 | 0.66 | 0.07 | 129 | 71 | SERPINA3 Alpha-1-antichymotrypsin precursor | n[145]NLAVSQVVHK[272]                  | 3 | 461.6168  | 2.04  | 0.073 |
| 139 | IPI00550991 | 1 | 52.7 | 0.66 | 0.07 | 129 | 71 | SERPINA3 Alpha-1-antichymotrypsin precursor | n[145]ITLLSALVETR                      | 2 | 680.42    | 3.479 | 0.271 |
| 139 | IPI00550991 | 1 | 52.7 | 0.66 | 0.07 | 129 | 71 | SERPINA3 Alpha-1-antichymotrypsin precursor | n[145]WEM[147]FPDPQDTHQSR              | 3 | 645.2922  | 2.465 | 0.374 |
| 139 | IPI00550991 | 1 | 52.7 | 0.66 | 0.07 | 129 | 71 | SERPINA3 Alpha-1-antichymotrypsin precursor | n[145]ADLSGITGAR                       | 2 | 552.8101  | 2.375 | 0.149 |
| 139 | IPI00550991 | 1 | 52.7 | 0.66 | 0.07 | 129 | 71 | SERPINA3 Alpha-1-antichymotrypsin precursor | n[145]NLAVSQVVHK[272]                  | 2 | 691.9216  | 4.007 | 0.332 |
| 139 | IPI00550991 | 1 | 52.7 | 0.66 | 0.07 | 129 | 71 | SERPINA3 Alpha-1-antichymotrypsin precursor | LM[147]IIVPTDTQNIFFMSK                 | 3 | 765.4144  | 3.45  | 0.421 |
| 139 | IPI00550991 | 1 | 52.7 | 0.66 | 0.07 | 129 | 71 | SERPINA3 Alpha-1-antichymotrypsin precursor | n[145]EIGELYLPK[272]                   | 2 | 675.3996  | 3.076 | 0.252 |
| 139 | IPI00550991 | 1 | 52.7 | 0.66 | 0.07 | 129 | 71 | SERPINA3 Alpha-1-antichymotrypsin precursor | n[145]MSLHHLTIPYFR                     | 3 | 553.6368  | 2.386 | 0.227 |
| 139 | IPI00550991 | 1 | 52.7 | 0.66 | 0.07 | 129 | 71 | SERPINA3 Alpha-1-antichymotrypsin precursor | EIGELYLPK                              | 2 | 671.3925  | 2.877 | 0.21  |
| 139 | IPI00550991 | 1 | 52.7 | 0.66 | 0.07 | 129 | 71 | SERPINA3 Alpha-1-antichymotrypsin precursor | n[145]DEELSCTVVELK[272]                | 2 | 849.9303  | 4.95  | 0.24  |
| 139 | IPI00550991 | 1 | 52.7 | 0.66 | 0.07 | 129 | 71 | SERPINA3 Alpha-1-antichymotrypsin precursor | NLAVSQVVHK                             | 3 | 458.9454  | 3.075 | 0.171 |
| 139 | IPI00550991 | 1 | 52.7 | 0.66 | 0.07 | 129 | 71 | SERPINA3 Alpha-1-antichymotrypsin precursor | ADLSGITGAR                             | 2 | 550.8066  | 2.86  | 0.311 |
| 139 | IPI00550991 | 1 | 52.7 | 0.66 | 0.07 | 129 | 71 | SERPINA3 Alpha-1-antichymotrypsin precursor | LINDYVK                                | 2 | 572.8399  | 3.117 | 0.171 |
| 139 | IPI00550991 | 1 | 52.7 | 0.66 | 0.07 | 129 | 71 | SERPINA3 Alpha-1-antichymotrypsin precursor | KLINDYVK                               | 2 | 706.9349  | 3.276 | 0.143 |
| 139 | IPI00550991 | 1 | 52.7 | 0.66 | 0.07 | 129 | 71 | SERPINA3 Alpha-1-antichymotrypsin precursor | EQLSLLDR                               | 1 | 1113.6263 | 2.352 | 0.137 |
| 139 | IPI00550991 | 1 | 52.7 | 0.66 | 0.07 | 129 | 71 | SERPINA3 Alpha-1-antichymotrypsin precursor | n[145]EQLSLLDR                         | 1 | 1117.6334 | 2.357 | 0.127 |
| 139 | IPI00550991 | 1 | 52.7 | 0.66 | 0.07 | 129 | 71 | SERPINA3 Alpha-1-antichymotrypsin precursor | n[145]LM[147]IIVPTDTQNIFFM[147]SK[272] | 3 | 773.4175  | 3.226 | 0.386 |
| 139 | IPI00550991 | 1 | 52.7 | 0.66 | 0.07 | 129 | 71 | SERPINA3 Alpha-1-antichymotrypsin precursor | n[145]FTEDAK[272]                      | 1 | 998.5398  | 2.124 | 0.09  |
| 139 | IPI00550991 | 1 | 52.7 | 0.66 | 0.07 | 129 | 71 | SERPINA3 Alpha-1-antichymotrypsin precursor | n[145]EQLSLLDR                         | 2 | 559.3203  | 3.127 | 0.117 |
| 139 | IPI00550991 | 1 | 52.7 | 0.66 | 0.07 | 129 | 71 | SERPINA3 Alpha-1-antichymotrypsin precursor | n[145]ITLLSALVETR                      | 3 | 453.9491  | 3.43  | 0.117 |
| 139 | IPI00550991 | 1 | 52.7 | 0.66 | 0.07 | 129 | 71 | SERPINA3 Alpha-1-antichymotrypsin precursor | n[145]LMIIVPTDTQNIFFMSK[272]           | 3 | 762.7542  | 3.615 | 0.327 |
| 139 | IPI00550991 | 1 | 52.7 | 0.66 | 0.07 | 129 | 71 | SERPINA3 Alpha-1-antichymotrypsin precursor | n[145]FTEDAK[272]R                     | 3 | 385.5518  | 2.51  | 0.19  |
| 139 | IPI00550991 | 1 | 52.7 | 0.66 | 0.07 | 129 | 71 | SERPINA3 Alpha-1-antichymotrypsin precursor | n[145]MEEVEAM[147]LLPETLK[272]         | 2 | 969.0143  | 2.941 | 0.214 |
| 139 | IPI00550991 | 1 | 52.7 | 0.66 | 0.07 | 129 | 71 | SERPINA3 Alpha-1-antichymotrypsin precursor | n[145]FTEDAK[272]R                     | 2 | 577.8241  | 1.921 | 0.169 |
| 139 | IPI00550991 | 1 | 52.7 | 0.66 | 0.07 | 129 | 71 | SERPINA3 Alpha-1-antichymotrypsin precursor | FTEDAK                                 | 1 | 990.5256  | 2.028 | 0.021 |
| 139 | IPI00550991 | 1 | 52.7 | 0.66 | 0.07 | 129 | 71 | SERPINA3 Alpha-1-antichymotrypsin precursor | n[145]FRDEELSCTVVELK[272]              | 3 | 668.0124  | 3.662 | 0.362 |
| 139 | IPI00550991 | 1 | 52.7 | 0.66 | 0.07 | 129 | 71 | SERPINA3 Alpha-1-antichymotrypsin precursor | n[145]LINDYVK[272]                     | 2 | 576.847   | 2.217 | 0.127 |
| 139 | IPI00550991 | 1 | 52.7 | 0.66 | 0.07 | 129 | 71 | SERPINA3 Alpha-1-antichymotrypsin precursor | M[147]EEVEAM[147]LLPETLK               | 2 | 973.0047  | 2.235 | 0.221 |
| 139 | IPI00550991 | 1 | 52.7 | 0.66 | 0.07 | 129 | 71 | SERPINA3 Alpha-1-antichymotrypsin precursor | DLDSQTMM[147]VLVNYIFFK                 | 3 | 787.4058  | 4.795 | 0.325 |
| 139 | IPI00550991 | 1 | 52.7 | 0.66 | 0.07 | 129 | 71 | SERPINA3 Alpha-1-antichymotrypsin precursor | n[145]FTEDAK[272]                      | 2 | 499.7735  | 1.974 | 0.145 |
| 139 | IPI00550991 | 1 | 52.7 | 0.66 | 0.07 | 129 | 71 | SERPINA3 Alpha-1-antichymotrypsin precursor | n[145]ITDIK[272]                       | 2 | 495.8255  | 2.225 | 1     |
| 139 | IPI00550991 | 1 | 52.7 | 0.66 | 0.07 | 129 | 71 | SERPINA3 Alpha-1-antichymotrypsin precursor | n[145]LM[147]IIVPTDTQNIFFMSK[272]      | 3 | 768.0858  | 2.799 | 0.342 |
| 139 | IPI00550991 | 1 | 52.7 | 0.66 | 0.07 | 129 | 71 | SERPINA3 Alpha-1-antichymotrypsin precursor | FTEDAKR                                | 2 | 573.817   | 2.365 | 0.014 |
| 139 | IPI00550991 | 1 | 52.7 | 0.66 | 0.07 | 129 | 71 | SERPINA3 Alpha-1-antichymotrypsin precursor | EQLSLLDR                               | 2 | 557.3168  | 2.252 | 0.024 |
| 139 | IPI00550991 | 1 | 52.7 | 0.66 | 0.07 | 129 | 71 | SERPINA3 Alpha-1-antichymotrypsin precursor | n[145]IIVPTDTQNIFFM[147]SK[272]        | 3 | 686.711   | 3.586 | 0.194 |
| 139 | IPI00550991 | 1 | 52.7 | 0.66 | 0.07 | 129 | 71 | SERPINA3 Alpha-1-antichymotrypsin precursor | n[145]HPNSPLDEENLTQENQDR               | 2 | 1140.5341 | 4.59  | 0.379 |
| 139 | IPI00550991 | 1 | 52.7 | 0.66 | 0.07 | 129 | 71 | SERPINA3 Alpha-1-antichymotrypsin precursor | n[145]IIVPTDTQNIFFMSK[272]             | 3 | 681.3793  | 2.999 | 0.3   |
| 139 | IPI00550991 | 1 | 52.7 | 0.66 | 0.07 | 129 | 71 | SERPINA3 Alpha-1-antichymotrypsin precursor | n[145]DSLEFR                           | 2 | 455.7412  | 1.898 | 0.033 |
| 139 | IPI00550991 | 1 | 52.7 | 0.66 | 0.07 | 129 | 71 | SERPINA3 Alpha-1-antichymotrypsin precursor | n[145]SLHHLTIPYFR                      | 3 | 509.9566  | 2.511 | 0.291 |
| 139 | IPI00550991 | 1 | 52.7 | 0.66 | 0.07 | 129 | 71 | SERPINA3 Alpha-1-antichymotrypsin precursor | LMIIVPTDTQNIFFMSK                      | 3 | 760.0828  | 3.038 | 0.267 |
| 139 | IPI00550991 | 1 | 52.7 | 0.66 | 0.07 | 129 | 71 | SERPINA3 Alpha-1-antichymotrypsin precursor | DSLEFR                                 | 1 | 906.468   | 1.428 | 0.085 |
| 139 | IPI00550991 | 1 | 52.7 | 0.66 | 0.07 | 129 | 71 | SERPINA3 Alpha-1-antichymotrypsin precursor | n[145]DLDSQTMM[147]VLVNYIFFK[272]      | 3 | 790.0772  | 3.689 | 0.294 |
| 139 | IPI00550991 | 1 | 52.7 | 0.66 | 0.07 | 129 | 71 | SERPINA3 Alpha-1-antichymotrypsin precursor | n[145]VLVNYIFFK[272]                   | 2 | 715.9362  | 3.813 | 0.333 |
| 139 | IPI00550991 | 1 | 52.7 | 0.66 | 0.07 | 129 | 71 | SERPINA3 Alpha-1-antichymotrypsin precursor | n[145]FYLSK[272]K[272]                 | 3 | 406.5921  | 1.855 | 0.022 |
| 139 | IPI00550991 | 1 | 52.7 | 0.66 | 0.07 | 129 | 71 | SERPINA3 Alpha-1-antichymotrypsin precursor | n[145]ITLLSALVETR                      | 2 | 623.878   | 3.177 | 0.186 |
| 139 | IPI00550991 | 1 | 52.7 | 0.66 | 0.07 | 129 | 71 | SERPINA3 Alpha-1-antichymotrypsin precursor | n[145]MEEVEAMLLPETLK[272]              | 2 | 961.0169  | 1.417 | 0.043 |

|     |             |   |      |      |      |     |    |                                             |                                           |   |           |       |       |
|-----|-------------|---|------|------|------|-----|----|---------------------------------------------|-------------------------------------------|---|-----------|-------|-------|
| 139 | IPI00550991 | 1 | 52.7 | 0.66 | 0.07 | 129 | 71 | SERPINA3 Alpha-1-antichymotrypsin precursor | FTEDAK                                    | 2 | 495.7664  | 1.516 | 0.011 |
| 139 | IPI00550991 | 1 | 52.7 | 0.66 | 0.07 | 129 | 71 | SERPINA3 Alpha-1-antichymotrypsin precursor | IIVPTDTONIFFM[147]SK                      | 3 | 684.0396  | 2.976 | 0.193 |
| 139 | IPI00550991 | 1 | 52.7 | 0.66 | 0.07 | 129 | 71 | SERPINA3 Alpha-1-antichymotrypsin precursor | n[145]MEEVEAM[147]LLPETLK[272]R           | 3 | 698.379   | 1.926 | 0.079 |
| 139 | IPI00550991 | 1 | 52.7 | 0.66 | 0.07 | 129 | 71 | SERPINA3 Alpha-1-antichymotrypsin precursor | n[145]AVLDVFEEGTEASAATAVK[272]            | 3 | 732.7261  | 2.098 | 0.061 |
| 139 | IPI00550991 | 1 | 52.7 | 0.66 | 0.07 | 129 | 71 | SERPINA3 Alpha-1-antichymotrypsin precursor | LYGSEAFATDFQDSAAAK                        | 3 | 724.6918  | 2.096 | 0.09  |
| 139 | IPI00550991 | 1 | 52.7 | 0.66 | 0.07 | 129 | 71 | SERPINA3 Alpha-1-antichymotrypsin precursor | LM[147]IIVPTDTONIFFM[147]SK               | 3 | 770.7461  | 2.807 | 0.14  |
| 139 | IPI00550991 | 1 | 52.7 | 0.66 | 0.07 | 129 | 71 | SERPINA3 Alpha-1-antichymotrypsin precursor | n[145]DLSGITGAR                           | 2 | 517.2916  | 2.405 | 0.121 |
| 139 | IPI00550991 | 1 | 52.7 | 0.66 | 0.07 | 129 | 71 | SERPINA3 Alpha-1-antichymotrypsin precursor | n[145]HLTIPYFR                            | 2 | 595.8438  | 2.075 | 0.168 |
| 139 | IPI00550991 | 1 | 52.7 | 0.66 | 0.07 | 129 | 71 | SERPINA3 Alpha-1-antichymotrypsin precursor | n[145]EQLSLLDRFTEDAK[272]R                | 4 | 528.044   | 1.993 | 0.004 |
| 139 | IPI00550991 | 1 | 52.7 | 0.66 | 0.07 | 129 | 71 | SERPINA3 Alpha-1-antichymotrypsin precursor | n[145]SALVETR                             | 2 | 460.2701  | 2.216 | 0.041 |
| 139 | IPI00550991 | 1 | 52.7 | 0.66 | 0.07 | 129 | 71 | SERPINA3 Alpha-1-antichymotrypsin precursor | SK[272]K[272]                             | 2 | 395.7731  | 0.913 | 0.136 |
| 140 | IPI00555812 | 1 | 62.9 | 0.92 | 0.02 | 8   | 89 | GC Vitamin D-binding protein precursor      | n[145]EFSHLGK[272]                        | 1 | 1105.6245 | 2.704 | 0.288 |
| 140 | IPI00555812 | 1 | 62.9 | 0.92 | 0.02 | 8   | 89 | GC Vitamin D-binding protein precursor      | CCESASEDCMAK                              | 2 | 847.7958  | 4.096 | 0.606 |
| 140 | IPI00555812 | 1 | 62.9 | 0.92 | 0.02 | 8   | 89 | GC Vitamin D-binding protein precursor      | CCESASEDCM[147]AK                         | 2 | 855.7933  | 3.887 | 0.695 |
| 140 | IPI00555812 | 1 | 62.9 | 0.92 | 0.02 | 8   | 89 | GC Vitamin D-binding protein precursor      | DVCDPGNTK                                 | 2 | 637.797   | 3.076 | 0.521 |
| 140 | IPI00555812 | 1 | 62.9 | 0.92 | 0.02 | 8   | 89 | GC Vitamin D-binding protein precursor      | GQELCADYSENTFTEYK                         | 2 | 1162.5141 | 5.726 | 0.589 |
| 140 | IPI00555812 | 1 | 62.9 | 0.92 | 0.02 | 8   | 89 | GC Vitamin D-binding protein precursor      | SCESNSPPFVHPGTAECCTK                      | 2 | 1256.5164 | 6.319 | 0.642 |
| 140 | IPI00555812 | 1 | 62.9 | 0.92 | 0.02 | 8   | 89 | GC Vitamin D-binding protein precursor      | SLGECCDVEDSTTCFNAK                        | 2 | 1170.4608 | 4.342 | 0.627 |
| 140 | IPI00555812 | 1 | 62.9 | 0.92 | 0.02 | 8   | 89 | GC Vitamin D-binding protein precursor      | VCSQYAAYGEK                               | 2 | 772.8655  | 3.798 | 0.348 |
| 140 | IPI00555812 | 1 | 62.9 | 0.92 | 0.02 | 8   | 89 | GC Vitamin D-binding protein precursor      | VPTADLEDVPLAEDITNILSK                     | 2 | 1323.7337 | 4.834 | 0.455 |
| 140 | IPI00555812 | 1 | 62.9 | 0.92 | 0.02 | 8   | 89 | GC Vitamin D-binding protein precursor      | n[145]CCESASEDCMAK[272]                   | 2 | 851.8029  | 4.28  | 0.646 |
| 140 | IPI00555812 | 1 | 62.9 | 0.92 | 0.02 | 8   | 89 | GC Vitamin D-binding protein precursor      | n[145]GQELCADYSENTFTEYK[272]              | 2 | 1166.5212 | 6.078 | 0.616 |
| 140 | IPI00555812 | 1 | 62.9 | 0.92 | 0.02 | 8   | 89 | GC Vitamin D-binding protein precursor      | n[145]SCESNSPPFVHPGTAECCTK[272]           | 2 | 1260.5235 | 5.232 | 0.653 |
| 140 | IPI00555812 | 1 | 62.9 | 0.92 | 0.02 | 8   | 89 | GC Vitamin D-binding protein precursor      | n[145]SLGECCDVEDSTTCFNAK[272]             | 2 | 1174.4679 | 4.977 | 0.684 |
| 140 | IPI00555812 | 1 | 62.9 | 0.92 | 0.02 | 8   | 89 | GC Vitamin D-binding protein precursor      | n[145]VCSQYAAYGEK[272]                    | 2 | 776.8726  | 4.007 | 0.521 |
| 140 | IPI00555812 | 1 | 62.9 | 0.92 | 0.02 | 8   | 89 | GC Vitamin D-binding protein precursor      | n[145]VPTADLEDVPLAEDITNILSK[272]          | 2 | 1327.7408 | 4.919 | 0.487 |
| 140 | IPI00555812 | 1 | 62.9 | 0.92 | 0.02 | 8   | 89 | GC Vitamin D-binding protein precursor      | KFPSGTFEQVSQLVK                           | 3 | 705.7369  | 2.6   | 0.142 |
| 140 | IPI00555812 | 1 | 62.9 | 0.92 | 0.02 | 8   | 89 | GC Vitamin D-binding protein precursor      | SCESNSPPFVHPGTAECCTK                      | 3 | 838.0134  | 3.191 | 0.5   |
| 140 | IPI00555812 | 1 | 62.9 | 0.92 | 0.02 | 8   | 89 | GC Vitamin D-binding protein precursor      | VPTADLEDVPLAEDITNILSK                     | 3 | 882.8249  | 3.047 | 0.191 |
| 140 | IPI00555812 | 1 | 62.9 | 0.92 | 0.02 | 8   | 89 | GC Vitamin D-binding protein precursor      | n[145]ELSSFIDK[272]GQELCADYSENTFTEYK[272] | 3 | 1132.539  | 7.664 | 0.627 |
| 140 | IPI00555812 | 1 | 62.9 | 0.92 | 0.02 | 8   | 89 | GC Vitamin D-binding protein precursor      | n[145]SCESNSPPFVHPGTAECCTK[272]           | 3 | 840.6848  | 3.95  | 0.566 |
| 140 | IPI00555812 | 1 | 62.9 | 0.92 | 0.02 | 8   | 89 | GC Vitamin D-binding protein precursor      | n[145]SPFPVHPGTAECCTK[272]                | 3 | 651.9693  | 4.226 | 0.492 |
| 140 | IPI00555812 | 1 | 62.9 | 0.92 | 0.02 | 8   | 89 | GC Vitamin D-binding protein precursor      | n[145]VPTADLEDVPLAEDITNILSK[272]          | 3 | 885.4963  | 2.149 | 0.323 |
| 140 | IPI00555812 | 1 | 62.9 | 0.92 | 0.02 | 8   | 89 | GC Vitamin D-binding protein precursor      | AKLPDATPK                                 | 3 | 454.2819  | 3.171 | 0.33  |
| 140 | IPI00555812 | 1 | 62.9 | 0.92 | 0.02 | 8   | 89 | GC Vitamin D-binding protein precursor      | KLCMAALK                                  | 3 | 448.5957  | 3.176 | 0.253 |
| 140 | IPI00555812 | 1 | 62.9 | 0.92 | 0.02 | 8   | 89 | GC Vitamin D-binding protein precursor      | KLCM[147]AALK                             | 3 | 453.9273  | 2.708 | 0.318 |
| 140 | IPI00555812 | 1 | 62.9 | 0.92 | 0.02 | 8   | 89 | GC Vitamin D-binding protein precursor      | RTHLPEVFLSK                               | 3 | 536.3191  | 3.15  | 0.347 |
| 140 | IPI00555812 | 1 | 62.9 | 0.92 | 0.02 | 8   | 89 | GC Vitamin D-binding protein precursor      | n[145]AK[272]LPDATPK[272]                 | 3 | 458.289   | 3.556 | 0.278 |
| 140 | IPI00555812 | 1 | 62.9 | 0.92 | 0.02 | 8   | 89 | GC Vitamin D-binding protein precursor      | n[145]THLPEVFLSK[272]                     | 3 | 486.9568  | 2.858 | 0.163 |
| 140 | IPI00555812 | 1 | 62.9 | 0.92 | 0.02 | 8   | 89 | GC Vitamin D-binding protein precursor      | n[145]HQPQEFTYVEPTNDEICEAFR               | 4 | 710.8249  | 2.721 | 0.286 |
| 140 | IPI00555812 | 1 | 62.9 | 0.92 | 0.02 | 8   | 89 | GC Vitamin D-binding protein precursor      | KFPSGTFEQVSQLVK                           | 2 | 1058.1017 | 3.827 | 0.349 |
| 140 | IPI00555812 | 1 | 62.9 | 0.92 | 0.02 | 8   | 89 | GC Vitamin D-binding protein precursor      | RTHLPEVFLSK                               | 2 | 803.9751  | 3.523 | 0.431 |
| 140 | IPI00555812 | 1 | 62.9 | 0.92 | 0.02 | 8   | 89 | GC Vitamin D-binding protein precursor      | n[145]RTHLPEVFLSK[272]                    | 2 | 807.9822  | 3.92  | 0.36  |
| 140 | IPI00555812 | 1 | 62.9 | 0.92 | 0.02 | 8   | 89 | GC Vitamin D-binding protein precursor      | LCDNLSTK                                  | 2 | 610.3123  | 2.919 | 0.285 |
| 140 | IPI00555812 | 1 | 62.9 | 0.92 | 0.02 | 8   | 89 | GC Vitamin D-binding protein precursor      | n[145]EDFTSLSLVLYSR                       | 2 | 837.447   | 3.736 | 0.323 |
| 140 | IPI00555812 | 1 | 62.9 | 0.92 | 0.02 | 8   | 89 | GC Vitamin D-binding protein precursor      | n[145]EFSHLGK[272]                        | 2 | 553.3159  | 2.958 | 0.263 |
| 140 | IPI00555812 | 1 | 62.9 | 0.92 | 0.02 | 8   | 89 | GC Vitamin D-binding protein precursor      | n[145]HLSLLTTLNLR                         | 2 | 699.9129  | 3.504 | 0.264 |
| 140 | IPI00555812 | 1 | 62.9 | 0.92 | 0.02 | 8   | 89 | GC Vitamin D-binding protein precursor      | n[145]LCDNLSTK[272]                       | 2 | 614.3194  | 2.937 | 0.277 |

|     |             |   |      |      |      |   |    |                                        |                                   |   |           |       |       |
|-----|-------------|---|------|------|------|---|----|----------------------------------------|-----------------------------------|---|-----------|-------|-------|
| 140 | IPI00555812 | 1 | 62.9 | 0.92 | 0.02 | 8 | 89 | GC Vitamin D-binding protein precursor | FPSGTFEQVSQLVK                    | 3 | 616.3403  | 2.872 | 0.234 |
| 140 | IPI00555812 | 1 | 62.9 | 0.92 | 0.02 | 8 | 89 | GC Vitamin D-binding protein precursor | KELSSFIDK                         | 3 | 496.2925  | 3.188 | 0.172 |
| 140 | IPI00555812 | 1 | 62.9 | 0.92 | 0.02 | 8 | 89 | GC Vitamin D-binding protein precursor | n[145]ELSSFIDK[272]               | 1 | 1226.6872 | 2.552 | 0.242 |
| 140 | IPI00555812 | 1 | 62.9 | 0.92 | 0.02 | 8 | 89 | GC Vitamin D-binding protein precursor | n[145]DVCDPGNTK[272]              | 2 | 641.8041  | 2.877 | 0.309 |
| 140 | IPI00555812 | 1 | 62.9 | 0.92 | 0.02 | 8 | 89 | GC Vitamin D-binding protein precursor | THLPEVFLSK                        | 3 | 484.2854  | 3.114 | 0.172 |
| 140 | IPI00555812 | 1 | 62.9 | 0.92 | 0.02 | 8 | 89 | GC Vitamin D-binding protein precursor | n[145]LCDNLSTK[272]               | 1 | 1227.6316 | 2.532 | 0.237 |
| 140 | IPI00555812 | 1 | 62.9 | 0.92 | 0.02 | 8 | 89 | GC Vitamin D-binding protein precursor | ELSSFIDK                          | 2 | 609.8401  | 3.559 | 0.188 |
| 140 | IPI00555812 | 1 | 62.9 | 0.92 | 0.02 | 8 | 89 | GC Vitamin D-binding protein precursor | n[145]ELSSFIDK[272]               | 2 | 613.8472  | 2.449 | 0.126 |
| 140 | IPI00555812 | 1 | 62.9 | 0.92 | 0.02 | 8 | 89 | GC Vitamin D-binding protein precursor | n[145]FPSGTFEQVSQLVK[272]         | 3 | 619.0117  | 3.158 | 0.238 |
| 140 | IPI00555812 | 1 | 62.9 | 0.92 | 0.02 | 8 | 89 | GC Vitamin D-binding protein precursor | n[145]VM[147]DK[272]YTFELSR       | 3 | 564.9672  | 2.108 | 0.36  |
| 140 | IPI00555812 | 1 | 62.9 | 0.92 | 0.02 | 8 | 89 | GC Vitamin D-binding protein precursor | ELSSFIDK                          | 1 | 1218.673  | 2.311 | 0.242 |
| 140 | IPI00555812 | 1 | 62.9 | 0.92 | 0.02 | 8 | 89 | GC Vitamin D-binding protein precursor | YTFELSR                           | 1 | 1055.5521 | 2.382 | 0.255 |
| 140 | IPI00555812 | 1 | 62.9 | 0.92 | 0.02 | 8 | 89 | GC Vitamin D-binding protein precursor | n[145]DVCDPGNTK[272]              | 1 | 1282.601  | 2.107 | 0.413 |
| 140 | IPI00555812 | 1 | 62.9 | 0.92 | 0.02 | 8 | 89 | GC Vitamin D-binding protein precursor | EFSHLGK                           | 2 | 549.3088  | 2.484 | 0.267 |
| 140 | IPI00555812 | 1 | 62.9 | 0.92 | 0.02 | 8 | 89 | GC Vitamin D-binding protein precursor | ELPEHTVK                          | 2 | 616.8535  | 2.508 | 0.153 |
| 140 | IPI00555812 | 1 | 62.9 | 0.92 | 0.02 | 8 | 89 | GC Vitamin D-binding protein precursor | n[145]THLPEVFLSK[272]             | 2 | 729.9316  | 2.826 | 0.292 |
| 140 | IPI00555812 | 1 | 62.9 | 0.92 | 0.02 | 8 | 89 | GC Vitamin D-binding protein precursor | n[145]VLEPTLK[272]                | 1 | 1087.6966 | 2.065 | 0.184 |
| 140 | IPI00555812 | 1 | 62.9 | 0.92 | 0.02 | 8 | 89 | GC Vitamin D-binding protein precursor | n[145]RTHLPEVFLSK[272]            | 3 | 538.9905  | 2.521 | 0.21  |
| 140 | IPI00555812 | 1 | 62.9 | 0.92 | 0.02 | 8 | 89 | GC Vitamin D-binding protein precursor | n[145]VPTADLEDVLPLAEDITNILSK[272] | 4 | 664.374   | 3.07  | 0.015 |
| 140 | IPI00555812 | 1 | 62.9 | 0.92 | 0.02 | 8 | 89 | GC Vitamin D-binding protein precursor | n[145]ELPEHTVK[272]               | 2 | 620.8606  | 2.22  | 0.177 |
| 140 | IPI00555812 | 1 | 62.9 | 0.92 | 0.02 | 8 | 89 | GC Vitamin D-binding protein precursor | NSKFEDCCQEK                       | 3 | 614.9384  | 2.917 | 0.249 |
| 140 | IPI00555812 | 1 | 62.9 | 0.92 | 0.02 | 8 | 89 | GC Vitamin D-binding protein precursor | n[145]YTFELSR                     | 1 | 1059.5592 | 2.028 | 0.197 |
| 140 | IPI00555812 | 1 | 62.9 | 0.92 | 0.02 | 8 | 89 | GC Vitamin D-binding protein precursor | THLPEVFLSK                        | 2 | 725.9245  | 2.577 | 0.285 |
| 140 | IPI00555812 | 1 | 62.9 | 0.92 | 0.02 | 8 | 89 | GC Vitamin D-binding protein precursor | VLEPTLK                           | 2 | 540.3448  | 2.119 | 0.244 |
| 140 | IPI00555812 | 1 | 62.9 | 0.92 | 0.02 | 8 | 89 | GC Vitamin D-binding protein precursor | n[145]VLEPTLK[272]                | 2 | 544.3519  | 2.321 | 0.122 |
| 140 | IPI00555812 | 1 | 62.9 | 0.92 | 0.02 | 8 | 89 | GC Vitamin D-binding protein precursor | n[145]FEDCCQEK[272]               | 1 | 1381.5499 | 2.155 | 0.345 |
| 140 | IPI00555812 | 1 | 62.9 | 0.92 | 0.02 | 8 | 89 | GC Vitamin D-binding protein precursor | KLCM[147]AALK                     | 2 | 680.3873  | 2.549 | 0.253 |
| 140 | IPI00555812 | 1 | 62.9 | 0.92 | 0.02 | 8 | 89 | GC Vitamin D-binding protein precursor | n[145]TSALSAK[272]                | 2 | 483.2972  | 2.861 | 0.135 |
| 140 | IPI00555812 | 1 | 62.9 | 0.92 | 0.02 | 8 | 89 | GC Vitamin D-binding protein precursor | n[145]YTFELSR                     | 2 | 530.2832  | 2.117 | 0.101 |
| 140 | IPI00555812 | 1 | 62.9 | 0.92 | 0.02 | 8 | 89 | GC Vitamin D-binding protein precursor | FEDCCQEK                          | 2 | 687.2715  | 2.27  | 0.214 |
| 140 | IPI00555812 | 1 | 62.9 | 0.92 | 0.02 | 8 | 89 | GC Vitamin D-binding protein precursor | n[145]HLSLLTTLNSR                 | 3 | 466.9444  | 2.137 | 0.188 |
| 140 | IPI00555812 | 1 | 62.9 | 0.92 | 0.02 | 8 | 89 | GC Vitamin D-binding protein precursor | KLCMAALK                          | 2 | 672.3899  | 2.503 | 0.13  |
| 140 | IPI00555812 | 1 | 62.9 | 0.92 | 0.02 | 8 | 89 | GC Vitamin D-binding protein precursor | TSALSAK                           | 2 | 479.2901  | 2.554 | 0.043 |
| 140 | IPI00555812 | 1 | 62.9 | 0.92 | 0.02 | 8 | 89 | GC Vitamin D-binding protein precursor | n[145]ELPEHTVK[272]               | 3 | 414.2428  | 1.535 | 0.027 |
| 140 | IPI00555812 | 1 | 62.9 | 0.92 | 0.02 | 8 | 89 | GC Vitamin D-binding protein precursor | n[145]AK[272]LPDATPK[272]         | 2 | 686.9299  | 2.806 | 0.261 |
| 140 | IPI00555812 | 1 | 62.9 | 0.92 | 0.02 | 8 | 89 | GC Vitamin D-binding protein precursor | AKLPDATPK                         | 2 | 680.9192  | 2.71  | 0.3   |
| 140 | IPI00555812 | 1 | 62.9 | 0.92 | 0.02 | 8 | 89 | GC Vitamin D-binding protein precursor | KFPSGTFEQVSQLVK                   | 4 | 529.5545  | 2.217 | 0.113 |
| 140 | IPI00555812 | 1 | 62.9 | 0.92 | 0.02 | 8 | 89 | GC Vitamin D-binding protein precursor | YTFELSR                           | 2 | 528.2797  | 2.135 | 0.055 |
| 140 | IPI00555812 | 1 | 62.9 | 0.92 | 0.02 | 8 | 89 | GC Vitamin D-binding protein precursor | n[145]VM[147]DK[272]YTFELSR       | 2 | 846.9471  | 2.245 | 0.276 |
| 140 | IPI00555812 | 1 | 62.9 | 0.92 | 0.02 | 8 | 89 | GC Vitamin D-binding protein precursor | ELPEHTVK                          | 3 | 411.5714  | 1.93  | 0.068 |
| 140 | IPI00555812 | 1 | 62.9 | 0.92 | 0.02 | 8 | 89 | GC Vitamin D-binding protein precursor | n[145]SCESNSPPVHPG                | 2 | 774.3406  | 3.567 | 0.441 |
| 140 | IPI00555812 | 1 | 62.9 | 0.92 | 0.02 | 8 | 89 | GC Vitamin D-binding protein precursor | n[145]EFSHLGK[272]                | 3 | 369.213   | 1.646 | 0.126 |
| 140 | IPI00555812 | 1 | 62.9 | 0.92 | 0.02 | 8 | 89 | GC Vitamin D-binding protein precursor | n[145]FEDCCQEK[272]               | 2 | 691.2786  | 1.373 | 0.05  |
| 140 | IPI00555812 | 1 | 62.9 | 0.92 | 0.02 | 8 | 89 | GC Vitamin D-binding protein precursor | n[145]SLGECCDVEDSTTCFNAK[272]     | 3 | 783.3144  | 1.966 | 0.144 |
| 140 | IPI00555812 | 1 | 62.9 | 0.92 | 0.02 | 8 | 89 | GC Vitamin D-binding protein precursor | EFSHLGK                           | 3 | 366.5416  | 2.061 | 0.021 |
| 140 | IPI00555812 | 1 | 62.9 | 0.92 | 0.02 | 8 | 89 | GC Vitamin D-binding protein precursor | n[145]SLLVSYTK[272]               | 2 | 599.8679  | 2.948 | 0.182 |
| 140 | IPI00555812 | 1 | 62.9 | 0.92 | 0.02 | 8 | 89 | GC Vitamin D-binding protein precursor | n[145]NSK[272]FEDCCQEK[272]       | 3 | 618.9455  | 2.241 | 0.12  |
| 140 | IPI00555812 | 1 | 62.9 | 0.92 | 0.02 | 8 | 89 | GC Vitamin D-binding protein precursor | n[145]CCESASEDCM[147]AK[272]      | 2 | 859.8004  | 2.133 | 0.363 |

|     |             |   |      |      |      |   |    |                                        |                                           |   |           |       |       |
|-----|-------------|---|------|------|------|---|----|----------------------------------------|-------------------------------------------|---|-----------|-------|-------|
| 140 | IPI00555812 | 1 | 62.9 | 0.92 | 0.02 | 8 | 89 | GC Vitamin D-binding protein precursor | n[145]VMDK[272]YTFELSR                    | 3 | 559.6355  | 2.342 | 0.066 |
| 140 | IPI00555812 | 1 | 62.9 | 0.92 | 0.02 | 8 | 89 | GC Vitamin D-binding protein precursor | VMDKYTFELSR                               | 3 | 556.9641  | 2.082 | 0.036 |
| 140 | IPI00555812 | 1 | 62.9 | 0.92 | 0.02 | 8 | 89 | GC Vitamin D-binding protein precursor | n[145]SCESNSPPFVHPGTA                     | 2 | 860.383   | 2.361 | 0.182 |
| 140 | IPI00555812 | 1 | 62.9 | 0.92 | 0.02 | 8 | 89 | GC Vitamin D-binding protein precursor | n[145]GPLLK[272]K[272]                    | 3 | 363.257   | 1.257 | 0.134 |
| 140 | IPI00555812 | 1 | 62.9 | 0.92 | 0.02 | 8 | 89 | GC Vitamin D-binding protein precursor | n[145]SCESNSPPFVHPGTAECCTK[272]           | 4 | 630.7654  | 2.044 | 0.025 |
| 140 | IPI00555812 | 1 | 62.9 | 0.92 | 0.02 | 8 | 89 | GC Vitamin D-binding protein precursor | n[145]HQPQEFPTYVEPTNDEICEAFR              | 3 | 947.4307  | 2.939 | 0.094 |
| 140 | IPI00555812 | 1 | 62.9 | 0.92 | 0.02 | 8 | 89 | GC Vitamin D-binding protein precursor | FM[147]PAAQLPELDPVELPTNK                  | 3 | 802.7628  | 2.851 | 0.009 |
| 141 | IPI00654755 | 1 | 36.2 | 3.01 | 0.4  | 5 | 4  | HBB Hemoglobin subunit beta            | VLGAFSDGLAHLNLK                           | 3 | 650.6984  | 4.465 | 0.518 |
| 141 | IPI00654755 | 1 | 36.2 | 3.01 | 0.4  | 5 | 4  | HBB Hemoglobin subunit beta            | GTFATLSELHCDK                             | 3 | 583.2884  | 3.451 | 0.295 |
| 141 | IPI00654755 | 1 | 36.2 | 3.01 | 0.4  | 5 | 4  | HBB Hemoglobin subunit beta            | VHLTPEEK                                  | 2 | 616.8535  | 2.92  | 0.297 |
| 141 | IPI00654755 | 1 | 36.2 | 3.01 | 0.4  | 5 | 4  | HBB Hemoglobin subunit beta            | KVLGAFSDGLAHLNLK                          | 3 | 740.0951  | 2.401 | 0.091 |
| 142 | IPI00654875 | 1 | 51   | 1.25 | 0.2  | 7 | 5  | C4B Complement C4-B precursor          | CSVFYGAPSK                                | 2 | 692.8413  | 4.156 | 0.508 |
| 142 | IPI00654875 | 1 | 51   | 1.25 | 0.2  | 7 | 5  | C4B Complement C4-B precursor          | EMSGSPASGIPVK                             | 2 | 770.4136  | 4.147 | 0.436 |
| 142 | IPI00654875 | 1 | 51   | 1.25 | 0.2  | 7 | 5  | C4B Complement C4-B precursor          | GLEEELQFSLGSK                             | 2 | 858.962   | 5.125 | 0.492 |
| 142 | IPI00654875 | 1 | 51   | 1.25 | 0.2  | 7 | 5  | C4B Complement C4-B precursor          | ITQVLHFTK                                 | 2 | 683.9139  | 3.962 | 0.391 |
| 142 | IPI00654875 | 1 | 51   | 1.25 | 0.2  | 7 | 5  | C4B Complement C4-B precursor          | LTVAAPPSSGGPGFLSIER                       | 2 | 955.0307  | 3.152 | 0.543 |
| 142 | IPI00654875 | 1 | 51   | 1.25 | 0.2  | 7 | 5  | C4B Complement C4-B precursor          | VDVQAGACEGK                               | 2 | 701.8445  | 3.485 | 0.518 |
| 142 | IPI00654875 | 1 | 51   | 1.25 | 0.2  | 7 | 5  | C4B Complement C4-B precursor          | n[145]ASAGLLGAHAAAITAY                    | 2 | 801.442   | 4.133 | 0.557 |
| 142 | IPI00654875 | 1 | 51   | 1.25 | 0.2  | 7 | 5  | C4B Complement C4-B precursor          | n[145]AVGSGATFSHY                         | 2 | 620.8076  | 3.784 | 0.508 |
| 142 | IPI00654875 | 1 | 51   | 1.25 | 0.2  | 7 | 5  | C4B Complement C4-B precursor          | n[145]AVGSGATFSHY                         | 2 | 702.3393  | 3.831 | 0.484 |
| 142 | IPI00654875 | 1 | 51   | 1.25 | 0.2  | 7 | 5  | C4B Complement C4-B precursor          | n[145]AVGSGATFSHY[147]                    | 2 | 857.3886  | 3.96  | 0.462 |
| 142 | IPI00654875 | 1 | 51   | 1.25 | 0.2  | 7 | 5  | C4B Complement C4-B precursor          | n[145]CSVFYGAPSK[272]                     | 2 | 696.8484  | 3.605 | 0.505 |
| 142 | IPI00654875 | 1 | 51   | 1.25 | 0.2  | 7 | 5  | C4B Complement C4-B precursor          | n[145]DFALLSLQVPLK[272]                   | 2 | 816.5024  | 3.455 | 0.45  |
| 142 | IPI00654875 | 1 | 51   | 1.25 | 0.2  | 7 | 5  | C4B Complement C4-B precursor          | n[145]EELVYELNPLDHR                       | 2 | 885.9608  | 4.22  | 0.472 |
| 142 | IPI00654875 | 1 | 51   | 1.25 | 0.2  | 7 | 5  | C4B Complement C4-B precursor          | n[145]EMSGSPASGIPVK[272]                  | 2 | 774.4207  | 4.123 | 0.379 |
| 142 | IPI00654875 | 1 | 51   | 1.25 | 0.2  | 7 | 5  | C4B Complement C4-B precursor          | n[145]EM[147]SGSPASGIPVK[272]             | 2 | 782.4182  | 3.423 | 0.423 |
| 142 | IPI00654875 | 1 | 51   | 1.25 | 0.2  | 7 | 5  | C4B Complement C4-B precursor          | n[145]EPFLSCCQFAESLR                      | 2 | 933.4124  | 3.714 | 0.583 |
| 142 | IPI00654875 | 1 | 51   | 1.25 | 0.2  | 7 | 5  | C4B Complement C4-B precursor          | n[145]GHLFLQTDQPIYNPGQR                   | 2 | 1064.5565 | 5.825 | 0.54  |
| 142 | IPI00654875 | 1 | 51   | 1.25 | 0.2  | 7 | 5  | C4B Complement C4-B precursor          | n[145]GLEEELQFSLGSK[272]                  | 2 | 862.9691  | 4.809 | 0.498 |
| 142 | IPI00654875 | 1 | 51   | 1.25 | 0.2  | 7 | 5  | C4B Complement C4-B precursor          | n[145]GSFEFVGDVAVSK[272]                  | 2 | 814.4322  | 4.699 | 0.476 |
| 142 | IPI00654875 | 1 | 51   | 1.25 | 0.2  | 7 | 5  | C4B Complement C4-B precursor          | n[145]LSCCQFAESLR                         | 2 | 746.8305  | 3.205 | 0.529 |
| 142 | IPI00654875 | 1 | 51   | 1.25 | 0.2  | 7 | 5  | C4B Complement C4-B precursor          | n[145]LTVAAPPSSGGPGFLSIER                 | 2 | 957.0343  | 4.08  | 0.218 |
| 142 | IPI00654875 | 1 | 51   | 1.25 | 0.2  | 7 | 5  | C4B Complement C4-B precursor          | n[145]TTNIQGINLLFSSR                      | 2 | 854.4792  | 5.063 | 0.513 |
| 142 | IPI00654875 | 1 | 51   | 1.25 | 0.2  | 7 | 5  | C4B Complement C4-B precursor          | AEFQDALEKLNMGITDLQGLR                     | 3 | 881.4705  | 6.043 | 0.517 |
| 142 | IPI00654875 | 1 | 51   | 1.25 | 0.2  | 7 | 5  | C4B Complement C4-B precursor          | GPEVQLVAHSPWLK                            | 3 | 614.3526  | 4.21  | 0.408 |
| 142 | IPI00654875 | 1 | 51   | 1.25 | 0.2  | 7 | 5  | C4B Complement C4-B precursor          | n[145]AVGSGATFSHY[147]ILSR                | 3 | 728.3619  | 4.226 | 0.445 |
| 142 | IPI00654875 | 1 | 51   | 1.25 | 0.2  | 7 | 5  | C4B Complement C4-B precursor          | n[145]DFALLSLQVPLK[272]DAK[272]           | 3 | 697.4244  | 4.647 | 0.48  |
| 142 | IPI00654875 | 1 | 51   | 1.25 | 0.2  | 7 | 5  | C4B Complement C4-B precursor          | n[145]GHLFLQTDQPIYNPGQR                   | 3 | 710.0401  | 5.031 | 0.376 |
| 142 | IPI00654875 | 1 | 51   | 1.25 | 0.2  | 7 | 5  | C4B Complement C4-B precursor          | n[145]GPEVQLVAHSPWLK[272]                 | 3 | 617.024   | 3.685 | 0.406 |
| 142 | IPI00654875 | 1 | 51   | 1.25 | 0.2  | 7 | 5  | C4B Complement C4-B precursor          | n[145]LLATLCSAEEVCQCAEGK[272]             | 3 | 722.333   | 4.18  | 0.507 |
| 142 | IPI00654875 | 1 | 51   | 1.25 | 0.2  | 7 | 5  | C4B Complement C4-B precursor          | n[145]ITPGK[272]PYILTVPGHLDEM[147]QLDIQAR | 3 | 1037.2368 | 5.251 | 0.365 |
| 142 | IPI00654875 | 1 | 51   | 1.25 | 0.2  | 7 | 5  | C4B Complement C4-B precursor          | n[145]RGHLFLQTDQPIYNPGQR                  | 3 | 762.0738  | 5.052 | 0.404 |
| 142 | IPI00654875 | 1 | 51   | 1.25 | 0.2  | 7 | 5  | C4B Complement C4-B precursor          | n[145]VGLSGM[147]AIADVTLLSGFHALR          | 3 | 763.4233  | 4.694 | 0.422 |
| 142 | IPI00654875 | 1 | 51   | 1.25 | 0.2  | 7 | 5  | C4B Complement C4-B precursor          | n[145]YVSHFETEGPHVLLYFDSVPTSR             | 3 | 942.1403  | 6.174 | 0.531 |
| 142 | IPI00654875 | 1 | 51   | 1.25 | 0.2  | 7 | 5  | C4B Complement C4-B precursor          | ITPGKPYILTVPGHLDEMQLDIQAR                 | 4 | 772.1772  | 3.963 | 0.414 |
| 142 | IPI00654875 | 1 | 51   | 1.25 | 0.2  | 7 | 5  | C4B Complement C4-B precursor          | ITPGKPYILTVPGHLDEM[147]QLDIQAR            | 4 | 776.1759  | 5.288 | 0.551 |
| 142 | IPI00654875 | 1 | 51   | 1.25 | 0.2  | 7 | 5  | C4B Complement C4-B precursor          | n[145]ITPGK[272]PYILTVPGHLDEMQLDIQAR      | 4 | 774.1807  | 6.085 | 0.461 |
| 142 | IPI00654875 | 1 | 51   | 1.25 | 0.2  | 7 | 5  | C4B Complement C4-B precursor          | n[145]ITPGK[272]PYILTVPGHLDEM[147]QLDIQAR | 4 | 778.1794  | 2.699 | 0.069 |

|     |             |   |    |      |     |   |   |                               |                                 |   |           |       |       |
|-----|-------------|---|----|------|-----|---|---|-------------------------------|---------------------------------|---|-----------|-------|-------|
| 142 | IPI00654875 | 1 | 51 | 1.25 | 0.2 | 7 | 5 | C4B Complement C4-B precursor | AEFQDALEK                       | 2 | 665.8537  | 3.858 | 0.355 |
| 142 | IPI00654875 | 1 | 51 | 1.25 | 0.2 | 7 | 5 | C4B Complement C4-B precursor | n[145]FACYYP                    | 2 | 555.2551  | 2.206 | 0.17  |
| 142 | IPI00654875 | 1 | 51 | 1.25 | 0.2 | 7 | 5 | C4B Complement C4-B precursor | n[145]LGQYASPTAK[272]           | 2 | 662.3792  | 3.844 | 0.386 |
| 142 | IPI00654875 | 1 | 51 | 1.25 | 0.2 | 7 | 5 | C4B Complement C4-B precursor | AEFQDALEKLN[M][147]GITDLQGLR    | 3 | 886.8022  | 4.25  | 0.428 |
| 142 | IPI00654875 | 1 | 51 | 1.25 | 0.2 | 7 | 5 | C4B Complement C4-B precursor | DFALLSLQVPLKDAK                 | 3 | 693.4173  | 3.988 | 0.442 |
| 142 | IPI00654875 | 1 | 51 | 1.25 | 0.2 | 7 | 5 | C4B Complement C4-B precursor | GPVQLVAHSPWLK[272]              | 3 | 615.6883  | 3.613 | 0.322 |
| 142 | IPI00654875 | 1 | 51 | 1.25 | 0.2 | 7 | 5 | C4B Complement C4-B precursor | KYVLPNFEVK                      | 3 | 552.9994  | 2.879 | 0.147 |
| 142 | IPI00654875 | 1 | 51 | 1.25 | 0.2 | 7 | 5 | C4B Complement C4-B precursor | ITPGKPYLTVPGHLDEM[147]QLDIQAR   | 3 | 1034.5654 | 4.917 | 0.418 |
| 142 | IPI00654875 | 1 | 51 | 1.25 | 0.2 | 7 | 5 | C4B Complement C4-B precursor | ITQVLHFTK                       | 3 | 456.2784  | 2.988 | 0.284 |
| 142 | IPI00654875 | 1 | 51 | 1.25 | 0.2 | 7 | 5 | C4B Complement C4-B precursor | n[145]DK[272]GQAGLQR            | 3 | 420.9136  | 3.407 | 0.36  |
| 142 | IPI00654875 | 1 | 51 | 1.25 | 0.2 | 7 | 5 | C4B Complement C4-B precursor | n[145]EPFLSCCQFAESLR            | 3 | 622.6107  | 2.858 | 0.354 |
| 142 | IPI00654875 | 1 | 51 | 1.25 | 0.2 | 7 | 5 | C4B Complement C4-B precursor | n[145]HLVPGAPFLQLQALVR          | 3 | 592.3653  | 3.268 | 0.352 |
| 142 | IPI00654875 | 1 | 51 | 1.25 | 0.2 | 7 | 5 | C4B Complement C4-B precursor | n[145]ITQVLHFTK[272]            | 3 | 458.9498  | 3.398 | 0.281 |
| 142 | IPI00654875 | 1 | 51 | 1.25 | 0.2 | 7 | 5 | C4B Complement C4-B precursor | n[145]TTNIQGINLLFSSR            | 3 | 569.9885  | 2.805 | 0.291 |
| 142 | IPI00654875 | 1 | 51 | 1.25 | 0.2 | 7 | 5 | C4B Complement C4-B precursor | n[145]VLQIEK[272]EGAIHR         | 3 | 561.0048  | 3.426 | 0.317 |
| 142 | IPI00654875 | 1 | 51 | 1.25 | 0.2 | 7 | 5 | C4B Complement C4-B precursor | n[145]YIYGK[272]PVQGVAYVR       | 3 | 634.3678  | 2.501 | 0.405 |
| 142 | IPI00654875 | 1 | 51 | 1.25 | 0.2 | 7 | 5 | C4B Complement C4-B precursor | SHKPLNM[147]GK                  | 4 | 362.7106  | 2.598 | 0.371 |
| 142 | IPI00654875 | 1 | 51 | 1.25 | 0.2 | 7 | 5 | C4B Complement C4-B precursor | n[145]MRPSTDTITVMVENSHGLR       | 4 | 572.7957  | 5.056 | 0.307 |
| 142 | IPI00654875 | 1 | 51 | 1.25 | 0.2 | 7 | 5 | C4B Complement C4-B precursor | n[145]STQDVTIALDALSAYWIASHTTEER | 4 | 731.3705  | 3.342 | 0.297 |
| 142 | IPI00654875 | 1 | 51 | 1.25 | 0.2 | 7 | 5 | C4B Complement C4-B precursor | n[145]EGAIHREELVYELNPLDHR       | 5 | 487.6577  | 2.881 | 0.221 |
| 142 | IPI00654875 | 1 | 51 | 1.25 | 0.2 | 7 | 5 | C4B Complement C4-B precursor | DFALLSLQVPLK                    | 2 | 812.4953  | 3.688 | 0.363 |
| 142 | IPI00654875 | 1 | 51 | 1.25 | 0.2 | 7 | 5 | C4B Complement C4-B precursor | DHAVDLIQK                       | 2 | 659.8776  | 3.61  | 0.293 |
| 142 | IPI00654875 | 1 | 51 | 1.25 | 0.2 | 7 | 5 | C4B Complement C4-B precursor | EM[147]SGSPASGIPVK              | 2 | 778.4111  | 3.563 | 0.457 |
| 142 | IPI00654875 | 1 | 51 | 1.25 | 0.2 | 7 | 5 | C4B Complement C4-B precursor | LN[M][147]GITDLQGLR             | 2 | 743.906   | 3.41  | 0.381 |
| 142 | IPI00654875 | 1 | 51 | 1.25 | 0.2 | 7 | 5 | C4B Complement C4-B precursor | VEYGFQVK                        | 2 | 625.3506  | 2.739 | 0.251 |
| 142 | IPI00654875 | 1 | 51 | 1.25 | 0.2 | 7 | 5 | C4B Complement C4-B precursor | n[145]DHAVDLIQK[272]            | 2 | 663.8847  | 3.194 | 0.253 |
| 142 | IPI00654875 | 1 | 51 | 1.25 | 0.2 | 7 | 5 | C4B Complement C4-B precursor | n[145]GLQDEDEGYR                | 2 | 598.7869  | 2.88  | 0.329 |
| 142 | IPI00654875 | 1 | 51 | 1.25 | 0.2 | 7 | 5 | C4B Complement C4-B precursor | n[145]ITQVLHFTK[272]            | 2 | 687.921   | 3.949 | 0.349 |
| 142 | IPI00654875 | 1 | 51 | 1.25 | 0.2 | 7 | 5 | C4B Complement C4-B precursor | n[145]VEYGFQVK[272]             | 2 | 629.3577  | 2.729 | 0.346 |
| 142 | IPI00654875 | 1 | 51 | 1.25 | 0.2 | 7 | 5 | C4B Complement C4-B precursor | n[145]VLSLAQEQQVGG[SPEK][272]   | 2 | 915.5142  | 3.649 | 0.451 |
| 142 | IPI00654875 | 1 | 51 | 1.25 | 0.2 | 7 | 5 | C4B Complement C4-B precursor | DKGQAGLQR                       | 3 | 418.2422  | 3.421 | 0.265 |
| 142 | IPI00654875 | 1 | 51 | 1.25 | 0.2 | 7 | 5 | C4B Complement C4-B precursor | n[145]AIADVTTLLSGFHAI           | 3 | 576.669   | 4.098 | 0.39  |
| 142 | IPI00654875 | 1 | 51 | 1.25 | 0.2 | 7 | 5 | C4B Complement C4-B precursor | n[145]ALLHLLHEGK[272]           | 3 | 511.3236  | 3.916 | 0.369 |
| 142 | IPI00654875 | 1 | 51 | 1.25 | 0.2 | 7 | 5 | C4B Complement C4-B precursor | n[145]FGLLEDEGK[272]K[272]TFFR  | 3 | 702.3967  | 2.659 | 0.366 |
| 142 | IPI00654875 | 1 | 51 | 1.25 | 0.2 | 7 | 5 | C4B Complement C4-B precursor | n[145]FGLLEDEGK[272]K[272]TFFR  | 4 | 527.0494  | 2.623 | 0.329 |
| 142 | IPI00654875 | 1 | 51 | 1.25 | 0.2 | 7 | 5 | C4B Complement C4-B precursor | n[145]SHK[272]PLNM[147]GK[272]  | 4 | 365.7159  | 1.622 | 0.034 |
| 142 | IPI00654875 | 1 | 51 | 1.25 | 0.2 | 7 | 5 | C4B Complement C4-B precursor | LGQYASPTAK                      | 2 | 658.3721  | 3.374 | 0.31  |
| 142 | IPI00654875 | 1 | 51 | 1.25 | 0.2 | 7 | 5 | C4B Complement C4-B precursor | n[145]ADGSYAAWLSR               | 2 | 670.8394  | 3.681 | 0.33  |
| 142 | IPI00654875 | 1 | 51 | 1.25 | 0.2 | 7 | 5 | C4B Complement C4-B precursor | n[145]ANSFLGEK[272]             | 2 | 577.3264  | 3.063 | 0.223 |
| 142 | IPI00654875 | 1 | 51 | 1.25 | 0.2 | 7 | 5 | C4B Complement C4-B precursor | n[145]FGLLEDEGK[272]K[272]      | 2 | 777.4486  | 3.327 | 0.363 |
| 142 | IPI00654875 | 1 | 51 | 1.25 | 0.2 | 7 | 5 | C4B Complement C4-B precursor | n[145]LN[M][147]GITDLQGLR       | 2 | 745.9095  | 3.401 | 0.326 |
| 142 | IPI00654875 | 1 | 51 | 1.25 | 0.2 | 7 | 5 | C4B Complement C4-B precursor | n[145]GLCVATPVQLR               | 2 | 673.8739  | 2.58  | 0.407 |
| 142 | IPI00654875 | 1 | 51 | 1.25 | 0.2 | 7 | 5 | C4B Complement C4-B precursor | n[145]LNMGITDLQGLR              | 2 | 737.9121  | 3.365 | 0.22  |
| 142 | IPI00654875 | 1 | 51 | 1.25 | 0.2 | 7 | 5 | C4B Complement C4-B precursor | n[145]SCGLHQLLR                 | 2 | 608.8242  | 2.867 | 0.302 |
| 142 | IPI00654875 | 1 | 51 | 1.25 | 0.2 | 7 | 5 | C4B Complement C4-B precursor | n[145]VGDTLNLR                  | 2 | 629.8654  | 2.679 | 0.19  |
| 142 | IPI00654875 | 1 | 51 | 1.25 | 0.2 | 7 | 5 | C4B Complement C4-B precursor | FGLLEDEGKKTFFR                  | 3 | 698.3896  | 3.087 | 0.297 |
| 142 | IPI00654875 | 1 | 51 | 1.25 | 0.2 | 7 | 5 | C4B Complement C4-B precursor | n[145]DHAVDLIQK[272]            | 3 | 442.9255  | 3.57  | 0.152 |
| 142 | IPI00654875 | 1 | 51 | 1.25 | 0.2 | 7 | 5 | C4B Complement C4-B precursor | n[145]GLQDEDEGYR                | 1 | 1196.5665 | 2.57  | 0.3   |

|     |             |   |    |      |     |   |   |                               |                                   |   |           |       |       |
|-----|-------------|---|----|------|-----|---|---|-------------------------------|-----------------------------------|---|-----------|-------|-------|
| 142 | IPI00654875 | 1 | 51 | 1.25 | 0.2 | 7 | 5 | C4B Complement C4-B precursor | LNMGITDLQGLR                      | 2 | 735.9085  | 3.131 | 0.288 |
| 142 | IPI00654875 | 1 | 51 | 1.25 | 0.2 | 7 | 5 | C4B Complement C4-B precursor | n[145]TYNVLDM[147]K[272]          | 2 | 644.3465  | 1.719 | 0.281 |
| 142 | IPI00654875 | 1 | 51 | 1.25 | 0.2 | 7 | 5 | C4B Complement C4-B precursor | VLQIEKEGAIHR                      | 3 | 558.3334  | 3.607 | 0.24  |
| 142 | IPI00654875 | 1 | 51 | 1.25 | 0.2 | 7 | 5 | C4B Complement C4-B precursor | ANSFLGEK                          | 2 | 573.3193  | 3.156 | 0.216 |
| 142 | IPI00654875 | 1 | 51 | 1.25 | 0.2 | 7 | 5 | C4B Complement C4-B precursor | GSFEFPVGDAVSK                     | 2 | 810.4251  | 3.529 | 0.313 |
| 142 | IPI00654875 | 1 | 51 | 1.25 | 0.2 | 7 | 5 | C4B Complement C4-B precursor | KYVLPNFEVK                        | 2 | 828.9955  | 3.814 | 0.224 |
| 142 | IPI00654875 | 1 | 51 | 1.25 | 0.2 | 7 | 5 | C4B Complement C4-B precursor | n[145]TYNVLDMK[272]               | 2 | 636.3491  | 2.97  | 0.146 |
| 142 | IPI00654875 | 1 | 51 | 1.25 | 0.2 | 7 | 5 | C4B Complement C4-B precursor | EVQLVAHSPWLK                      | 3 | 562.9945  | 3.755 | 0.333 |
| 142 | IPI00654875 | 1 | 51 | 1.25 | 0.2 | 7 | 5 | C4B Complement C4-B precursor | n[145]SFQDLSPVIHR                 | 3 | 481.6006  | 3.483 | 0.348 |
| 142 | IPI00654875 | 1 | 51 | 1.25 | 0.2 | 7 | 5 | C4B Complement C4-B precursor | SHKPLNM[147]GK                    | 2 | 724.4138  | 2.044 | 0.214 |
| 142 | IPI00654875 | 1 | 51 | 1.25 | 0.2 | 7 | 5 | C4B Complement C4-B precursor | YVLPNFEVK                         | 2 | 694.9005  | 2.675 | 0.216 |
| 142 | IPI00654875 | 1 | 51 | 1.25 | 0.2 | 7 | 5 | C4B Complement C4-B precursor | n[145]AEFQDALEK[272]              | 2 | 669.8608  | 3.67  | 0.174 |
| 142 | IPI00654875 | 1 | 51 | 1.25 | 0.2 | 7 | 5 | C4B Complement C4-B precursor | n[145]VDVQAGACEGK[272]            | 2 | 705.8516  | 3.878 | 0.382 |
| 142 | IPI00654875 | 1 | 51 | 1.25 | 0.2 | 7 | 5 | C4B Complement C4-B precursor | n[145]VVVEQESR                    | 2 | 560.2918  | 2.084 | 0.38  |
| 142 | IPI00654875 | 1 | 51 | 1.25 | 0.2 | 7 | 5 | C4B Complement C4-B precursor | AIADVTLLSGFHALR                   | 3 | 575.3333  | 3.071 | 0.402 |
| 142 | IPI00654875 | 1 | 51 | 1.25 | 0.2 | 7 | 5 | C4B Complement C4-B precursor | EAPKVVEEQESR                      | 3 | 560.9687  | 2.849 | 0.27  |
| 142 | IPI00654875 | 1 | 51 | 1.25 | 0.2 | 7 | 5 | C4B Complement C4-B precursor | FGLLEDGKK                         | 3 | 514.6277  | 2.275 | 0.294 |
| 142 | IPI00654875 | 1 | 51 | 1.25 | 0.2 | 7 | 5 | C4B Complement C4-B precursor | n[145]AACAQNLDFLQEYGTQGCQV        | 3 | 799.0151  | 2.752 | 0.27  |
| 142 | IPI00654875 | 1 | 51 | 1.25 | 0.2 | 7 | 5 | C4B Complement C4-B precursor | n[145]LELSVDGAK[272]              | 2 | 610.3605  | 3.274 | 0.238 |
| 142 | IPI00654875 | 1 | 51 | 1.25 | 0.2 | 7 | 5 | C4B Complement C4-B precursor | n[145]SHK[272]PLNM[147]GK[272]    | 2 | 730.4245  | 1.698 | 0.204 |
| 142 | IPI00654875 | 1 | 51 | 1.25 | 0.2 | 7 | 5 | C4B Complement C4-B precursor | n[145]YVLPNFEVK[272]              | 2 | 698.9076  | 1.903 | 0.149 |
| 142 | IPI00654875 | 1 | 51 | 1.25 | 0.2 | 7 | 5 | C4B Complement C4-B precursor | TYNVLDM[147]K                     | 2 | 640.3394  | 2.201 | 0.094 |
| 142 | IPI00654875 | 1 | 51 | 1.25 | 0.2 | 7 | 5 | C4B Complement C4-B precursor | n[145]LTSLSDR                     | 2 | 468.2676  | 2.423 | 0.146 |
| 142 | IPI00654875 | 1 | 51 | 1.25 | 0.2 | 7 | 5 | C4B Complement C4-B precursor | n[145]LTVAAPPSSGGPGFLSIER         | 3 | 638.3586  | 4.106 | 0.332 |
| 142 | IPI00654875 | 1 | 51 | 1.25 | 0.2 | 7 | 5 | C4B Complement C4-B precursor | n[145]VTASDPLDTLGGSEGALSPGGVASLLR | 3 | 876.4718  | 3.352 | 0.189 |
| 142 | IPI00654875 | 1 | 51 | 1.25 | 0.2 | 7 | 5 | C4B Complement C4-B precursor | n[145]VEASISK[272]                | 2 | 511.3103  | 2.247 | 0.173 |
| 142 | IPI00654875 | 1 | 51 | 1.25 | 0.2 | 7 | 5 | C4B Complement C4-B precursor | VQQPDCR                           | 2 | 516.2417  | 2.111 | 0.272 |
| 142 | IPI00654875 | 1 | 51 | 1.25 | 0.2 | 7 | 5 | C4B Complement C4-B precursor | FGLLEDGKK                         | 2 | 771.438   | 3.21  | 0.188 |
| 142 | IPI00654875 | 1 | 51 | 1.25 | 0.2 | 7 | 5 | C4B Complement C4-B precursor | NNVPCSPK                          | 2 | 592.7994  | 2.199 | 0.257 |
| 142 | IPI00654875 | 1 | 51 | 1.25 | 0.2 | 7 | 5 | C4B Complement C4-B precursor | TYNVLDMK                          | 2 | 632.342   | 2.078 | 0.119 |
| 142 | IPI00654875 | 1 | 51 | 1.25 | 0.2 | 7 | 5 | C4B Complement C4-B precursor | n[145]DSSTWLTAFVLK[272]           | 2 | 828.466   | 3.967 | 0.279 |
| 142 | IPI00654875 | 1 | 51 | 1.25 | 0.2 | 7 | 5 | C4B Complement C4-B precursor | n[145]SHK[272]PLNMGK[272]         | 2 | 722.427   | 2.703 | 0.232 |
| 142 | IPI00654875 | 1 | 51 | 1.25 | 0.2 | 7 | 5 | C4B Complement C4-B precursor | VEASISK                           | 2 | 507.3032  | 2.326 | 0.154 |
| 142 | IPI00654875 | 1 | 51 | 1.25 | 0.2 | 7 | 5 | C4B Complement C4-B precursor | n[145]NVNFQK[272]                 | 2 | 519.3028  | 2.35  | 0.172 |
| 142 | IPI00654875 | 1 | 51 | 1.25 | 0.2 | 7 | 5 | C4B Complement C4-B precursor | n[145]VDFTLSSER                   | 2 | 599.3152  | 2.187 | 0.218 |
| 142 | IPI00654875 | 1 | 51 | 1.25 | 0.2 | 7 | 5 | C4B Complement C4-B precursor | n[145]SHK[272]PLNMGK[272]         | 4 | 361.7171  | 2.497 | 0.132 |
| 142 | IPI00654875 | 1 | 51 | 1.25 | 0.2 | 7 | 5 | C4B Complement C4-B precursor | SHKPLNMGK                         | 3 | 477.9466  | 2.093 | 0.224 |
| 142 | IPI00654875 | 1 | 51 | 1.25 | 0.2 | 7 | 5 | C4B Complement C4-B precursor | n[145]EVQLVAHSPWLK[272]           | 3 | 565.6659  | 3.689 | 0.225 |
| 142 | IPI00654875 | 1 | 51 | 1.25 | 0.2 | 7 | 5 | C4B Complement C4-B precursor | n[145]QGSFQGGFR                   | 2 | 564.2894  | 2.462 | 0.184 |
| 142 | IPI00654875 | 1 | 51 | 1.25 | 0.2 | 7 | 5 | C4B Complement C4-B precursor | n[145]VEASISK[272]                | 1 | 1021.6133 | 2.575 | 0.098 |
| 142 | IPI00654875 | 1 | 51 | 1.25 | 0.2 | 7 | 5 | C4B Complement C4-B precursor | n[145]SHK[272]PLNM[147]GK[272]    | 3 | 487.2854  | 1.917 | 0.235 |
| 142 | IPI00654875 | 1 | 51 | 1.25 | 0.2 | 7 | 5 | C4B Complement C4-B precursor | FGLLEDGK                          | 2 | 637.343   | 2.87  | 0.132 |
| 142 | IPI00654875 | 1 | 51 | 1.25 | 0.2 | 7 | 5 | C4B Complement C4-B precursor | TEQWSTLPPETK                      | 2 | 848.9489  | 2.692 | 0.186 |
| 142 | IPI00654875 | 1 | 51 | 1.25 | 0.2 | 7 | 5 | C4B Complement C4-B precursor | LELSVDGAK                         | 2 | 606.3534  | 2.333 | 0.235 |
| 142 | IPI00654875 | 1 | 51 | 1.25 | 0.2 | 7 | 5 | C4B Complement C4-B precursor | NVNFQK                            | 2 | 515.2957  | 2.077 | 0.171 |
| 142 | IPI00654875 | 1 | 51 | 1.25 | 0.2 | 7 | 5 | C4B Complement C4-B precursor | n[145]NNVPCSPK[272]               | 2 | 596.8065  | 2.336 | 0.204 |
| 142 | IPI00654875 | 1 | 51 | 1.25 | 0.2 | 7 | 5 | C4B Complement C4-B precursor | n[145]EFHLHLR                     | 2 | 548.3126  | 2.549 | 0.118 |
| 142 | IPI00654875 | 1 | 51 | 1.25 | 0.2 | 7 | 5 | C4B Complement C4-B precursor | SHKPLNM[147]GK                    | 3 | 483.2783  | 1.704 | 0.242 |



|     |             |   |    |      |     |   |   |                               |                                |   |          |       |       |
|-----|-------------|---|----|------|-----|---|---|-------------------------------|--------------------------------|---|----------|-------|-------|
| 142 | IPI00654875 | 1 | 51 | 1.25 | 0.2 | 7 | 5 | C4B Complement C4-B precursor | n[145]MRPSTDTITVM[147]VENSHGLR | 3 | 768.7234 | 3.518 | 0.11  |
| 142 | IPI00654875 | 1 | 51 | 1.25 | 0.2 | 7 | 5 | C4B Complement C4-B precursor | SHKPLNMGK                      | 2 | 716.4163 | 2.134 | 0.19  |
| 142 | IPI00654875 | 1 | 51 | 1.25 | 0.2 | 7 | 5 | C4B Complement C4-B precursor | n[145]VFALDQK[272]             | 2 | 554.8339 | 1.325 | 0.127 |
| 142 | IPI00654875 | 1 | 51 | 1.25 | 0.2 | 7 | 5 | C4B Complement C4-B precursor | n[145]EGAIHREELVYELNPLDHR      | 4 | 609.3204 | 2.196 | 0.158 |
| 142 | IPI00654875 | 1 | 51 | 1.25 | 0.2 | 7 | 5 | C4B Complement C4-B precursor | DSSTWLTAFLVK                   | 2 | 824.4589 | 2.857 | 0.154 |
| 142 | IPI00654875 | 1 | 51 | 1.25 | 0.2 | 7 | 5 | C4B Complement C4-B precursor | n[145]VQQPDCR                  | 2 | 518.2452 | 2.174 | 0.135 |
| 142 | IPI00654875 | 1 | 51 | 1.25 | 0.2 | 7 | 5 | C4B Complement C4-B precursor | n[145]PVAFSVPTAAAASLK[272]     | 3 | 639.3868 | 2.837 | 0.351 |
| 142 | IPI00654875 | 1 | 51 | 1.25 | 0.2 | 7 | 5 | C4B Complement C4-B precursor | n[145]GQIVFM[147]NR            | 2 | 562.8038 | 2.855 | 0.244 |
| 142 | IPI00654875 | 1 | 51 | 1.25 | 0.2 | 7 | 5 | C4B Complement C4-B precursor | n[145]DSSTWLTAFLVK             | 2 | 826.4625 | 2.676 | 0.091 |
| 142 | IPI00654875 | 1 | 51 | 1.25 | 0.2 | 7 | 5 | C4B Complement C4-B precursor | n[145]SHK[272]PLNMGK[272]      | 3 | 481.9537 | 2.203 | 0.161 |
| 142 | IPI00654875 | 1 | 51 | 1.25 | 0.2 | 7 | 5 | C4B Complement C4-B precursor | n[145]RGHLFLQTDQPIYNPGQR       | 4 | 571.8072 | 3.249 | 0.088 |
| 142 | IPI00654875 | 1 | 51 | 1.25 | 0.2 | 7 | 5 | C4B Complement C4-B precursor | n[145]TEQWSTLPPETK[272]        | 2 | 852.956  | 1.61  | 0.276 |
| 142 | IPI00654875 | 1 | 51 | 1.25 | 0.2 | 7 | 5 | C4B Complement C4-B precursor | n[145]CSVFGYAPSK[272]          | 3 | 464.9013 | 1.687 | 0.199 |
| 142 | IPI00654875 | 1 | 51 | 1.25 | 0.2 | 7 | 5 | C4B Complement C4-B precursor | GLESQTK                        | 2 | 521.7982 | 1.768 | 0.194 |
| 142 | IPI00654875 | 1 | 51 | 1.25 | 0.2 | 7 | 5 | C4B Complement C4-B precursor | n[145]JLTVPGHLDQMQLDIQAR       | 3 | 731.7321 | 3.846 | 0.231 |
| 142 | IPI00654875 | 1 | 51 | 1.25 | 0.2 | 7 | 5 | C4B Complement C4-B precursor | n[145]MRPSTDTITVM[147]VENSHGLR | 4 | 576.7944 | 2.715 | 0.134 |
| 142 | IPI00654875 | 1 | 51 | 1.25 | 0.2 | 7 | 5 | C4B Complement C4-B precursor | DHAVDLIQK                      | 3 | 440.2541 | 2.889 | 0.044 |
| 142 | IPI00654875 | 1 | 51 | 1.25 | 0.2 | 7 | 5 | C4B Complement C4-B precursor | AVGSGATFSH                     | 2 | 537.2724 | 3.193 | 0.45  |
| 142 | IPI00654875 | 1 | 51 | 1.25 | 0.2 | 7 | 5 | C4B Complement C4-B precursor | n[145]EFHLHLR                  | 3 | 365.8775 | 2.519 | 0.041 |
| 142 | IPI00654875 | 1 | 51 | 1.25 | 0.2 | 7 | 5 | C4B Complement C4-B precursor | n[145]FGLLDEDGK[272]           | 2 | 641.3501 | 2.202 | 0.081 |
| 142 | IPI00654875 | 1 | 51 | 1.25 | 0.2 | 7 | 5 | C4B Complement C4-B precursor | n[145]GSFQDLSPVIHR             | 2 | 750.408  | 4.043 | 0.353 |
| 142 | IPI00654875 | 1 | 51 | 1.25 | 0.2 | 7 | 5 | C4B Complement C4-B precursor | n[145]DK[272]GQAGLQR           | 2 | 630.8668 | 2.384 | 0.214 |
| 142 | IPI00654875 | 1 | 51 | 1.25 | 0.2 | 7 | 5 | C4B Complement C4-B precursor | n[145]LFETK[272]               | 2 | 463.2835 | 1.994 | 0.166 |
| 142 | IPI00654875 | 1 | 51 | 1.25 | 0.2 | 7 | 5 | C4B Complement C4-B precursor | n[145]PVQGVAYVR                | 2 | 566.8334 | 3.358 | 0.382 |
| 142 | IPI00654875 | 1 | 51 | 1.25 | 0.2 | 7 | 5 | C4B Complement C4-B precursor | n[145]YIYGK[272]PVQGVAY        | 2 | 823.4633 | 3.385 | 0.399 |
| 142 | IPI00654875 | 1 | 51 | 1.25 | 0.2 | 7 | 5 | C4B Complement C4-B precursor | n[145]AVGSGATFSHYYY            | 2 | 783.8709 | 3.188 | 0.505 |
| 142 | IPI00654875 | 1 | 51 | 1.25 | 0.2 | 7 | 5 | C4B Complement C4-B precursor | n[145]AVGSGATFSH               | 2 | 539.2759 | 2.899 | 0.417 |
| 142 | IPI00654875 | 1 | 51 | 1.25 | 0.2 | 7 | 5 | C4B Complement C4-B precursor | n[145]CCQDGVTR                 | 2 | 559.2226 | 1.446 | 0.03  |
| 142 | IPI00654875 | 1 | 51 | 1.25 | 0.2 | 7 | 5 | C4B Complement C4-B precursor | IFETK                          | 2 | 459.2764 | 1.916 | 0.139 |
| 142 | IPI00654875 | 1 | 51 | 1.25 | 0.2 | 7 | 5 | C4B Complement C4-B precursor | VFALDQK                        | 2 | 550.8268 | 1.851 | 0.074 |
| 142 | IPI00654875 | 1 | 51 | 1.25 | 0.2 | 7 | 5 | C4B Complement C4-B precursor | YIYGKPVQGVAY                   | 2 | 819.4562 | 3.234 | 0.414 |
| 142 | IPI00654875 | 1 | 51 | 1.25 | 0.2 | 7 | 5 | C4B Complement C4-B precursor | YIYGKPVQGVAYVR                 | 3 | 631.6964 | 2.829 | 0.034 |
| 142 | IPI00654875 | 1 | 51 | 1.25 | 0.2 | 7 | 5 | C4B Complement C4-B precursor | FGLLDEDGKKTFFR                 | 4 | 524.0441 | 2.773 | 0.093 |
| 142 | IPI00654875 | 1 | 51 | 1.25 | 0.2 | 7 | 5 | C4B Complement C4-B precursor | n[145]HLVPGAPFLLQALVR          | 2 | 888.0443 | 1.687 | 0.195 |
| 142 | IPI00654875 | 1 | 51 | 1.25 | 0.2 | 7 | 5 | C4B Complement C4-B precursor | n[145]AVGSGATFSHYYYM[147]IL    | 2 | 970.4727 | 2.976 | 0.414 |
| 142 | IPI00654875 | 1 | 51 | 1.25 | 0.2 | 7 | 5 | C4B Complement C4-B precursor | AVGSGATFSHYYY                  | 2 | 781.8674 | 2.367 | 0.416 |
| 142 | IPI00654875 | 1 | 51 | 1.25 | 0.2 | 7 | 5 | C4B Complement C4-B precursor | n[145]ACYYPR                   | 2 | 481.7209 | 2.41  | 0.292 |
| 142 | IPI00654875 | 1 | 51 | 1.25 | 0.2 | 7 | 5 | C4B Complement C4-B precursor | ADLEK                          | 2 | 428.2504 | 1.732 | 0.017 |
| 142 | IPI00654875 | 1 | 51 | 1.25 | 0.2 | 7 | 5 | C4B Complement C4-B precursor | DFALLSLQVPLK                   | 3 | 541.9993 | 2.954 | 0.027 |
| 142 | IPI00654875 | 1 | 51 | 1.25 | 0.2 | 7 | 5 | C4B Complement C4-B precursor | n[145]AIADVTLTLLSGFHALR        | 2 | 864.4999 | 3.688 | 0.454 |
| 142 | IPI00654875 | 1 | 51 | 1.25 | 0.2 | 7 | 5 | C4B Complement C4-B precursor | n[145]HLVPGAPF                 | 2 | 491.2856 | 1.528 | 0.243 |
| 142 | IPI00654875 | 1 | 51 | 1.25 | 0.2 | 7 | 5 | C4B Complement C4-B precursor | AVGSGATFSHYYYM[147]IL          | 2 | 968.4691 | 2.455 | 0.488 |
| 142 | IPI00654875 | 1 | 51 | 1.25 | 0.2 | 7 | 5 | C4B Complement C4-B precursor | n[145]HLVPGAPFLLQAL            | 2 | 760.4595 | 3.069 | 0.309 |
| 142 | IPI00654875 | 1 | 51 | 1.25 | 0.2 | 7 | 5 | C4B Complement C4-B precursor | ALLHLLLHEGK                    | 2 | 762.4747 | 3.934 | 0.398 |
| 142 | IPI00654875 | 1 | 51 | 1.25 | 0.2 | 7 | 5 | C4B Complement C4-B precursor | n[145]ALLHLLLHEGK[272]         | 2 | 766.4818 | 3.347 | 0.41  |
| 142 | IPI00654875 | 1 | 51 | 1.25 | 0.2 | 7 | 5 | C4B Complement C4-B precursor | n[145]ASAGLLGAH                | 2 | 470.7703 | 2.721 | 0.275 |
| 142 | IPI00654875 | 1 | 51 | 1.25 | 0.2 | 7 | 5 | C4B Complement C4-B precursor | n[145]LLLHEGK[272]             | 3 | 366.5689 | 2.178 | 0.215 |
| 142 | IPI00654875 | 1 | 51 | 1.25 | 0.2 | 7 | 5 | C4B Complement C4-B precursor | n[145]YYHGDHPVANSLR            | 3 | 558.2819 | 2.468 | 0.251 |

|     |             |   |      |      |      |    |    |                                   |                               |   |          |       |       |
|-----|-------------|---|------|------|------|----|----|-----------------------------------|-------------------------------|---|----------|-------|-------|
| 142 | IPI00654875 | 1 | 51   | 1.25 | 0.2  | 7  | 5  | C4B Complement C4-B precursor     | n[145]GSFQDLSPVIHR            | 3 | 500.6077 | 2.748 | 0.189 |
| 142 | IPI00654875 | 1 | 51   | 1.25 | 0.2  | 7  | 5  | C4B Complement C4-B precursor     | AVGSGATFSHY                   | 2 | 700.3357 | 2.46  | 0.338 |
| 142 | IPI00654875 | 1 | 51   | 1.25 | 0.2  | 7  | 5  | C4B Complement C4-B precursor     | n[145]EVQLVAHSPWLK[272]       | 2 | 847.9953 | 4.232 | 0.215 |
| 142 | IPI00654875 | 1 | 51   | 1.25 | 0.2  | 7  | 5  | C4B Complement C4-B precursor     | GPEVQLVAHSPWLK[272]           | 2 | 923.0288 | 3.57  | 0.337 |
| 142 | IPI00654875 | 1 | 51   | 1.25 | 0.2  | 7  | 5  | C4B Complement C4-B precursor     | n[145]DGSYAAWLSR              | 2 | 635.3209 | 2.097 | 0.306 |
| 142 | IPI00654875 | 1 | 51   | 1.25 | 0.2  | 7  | 5  | C4B Complement C4-B precursor     | LLLHEGK                       | 3 | 363.8975 | 2.328 | 0.183 |
| 142 | IPI00654875 | 1 | 51   | 1.25 | 0.2  | 7  | 5  | C4B Complement C4-B precursor     | HLVPGAPFLQ                    | 2 | 666.3954 | 2.52  | 0.362 |
| 142 | IPI00654875 | 1 | 51   | 1.25 | 0.2  | 7  | 5  | C4B Complement C4-B precursor     | n[145]DFALLSLQVPLK[272]       | 3 | 544.6707 | 2.364 | 0.024 |
| 142 | IPI00654875 | 1 | 51   | 1.25 | 0.2  | 7  | 5  | C4B Complement C4-B precursor     | n[145]SVGVQLQDVPR             | 2 | 671.384  | 3.329 | 0.196 |
| 142 | IPI00654875 | 1 | 51   | 1.25 | 0.2  | 7  | 5  | C4B Complement C4-B precursor     | LSCPK                         | 2 | 437.2379 | 1.377 | 0.033 |
| 142 | IPI00654875 | 1 | 51   | 1.25 | 0.2  | 7  | 5  | C4B Complement C4-B precursor     | ASAGLLGAH                     | 2 | 468.7667 | 2.087 | 0.309 |
| 142 | IPI00654875 | 1 | 51   | 1.25 | 0.2  | 7  | 5  | C4B Complement C4-B precursor     | HLVPGAPFLQA                   | 2 | 701.9139 | 2.071 | 0.363 |
| 142 | IPI00654875 | 1 | 51   | 1.25 | 0.2  | 7  | 5  | C4B Complement C4-B precursor     | n[145]YLAPTLAASR              | 2 | 660.3938 | 2.653 | 0.274 |
| 142 | IPI00654875 | 1 | 51   | 1.25 | 0.2  | 7  | 5  | C4B Complement C4-B precursor     | EVQLVAHSPWLK[272]             | 3 | 564.3302 | 3.088 | 0.226 |
| 142 | IPI00654875 | 1 | 51   | 1.25 | 0.2  | 7  | 5  | C4B Complement C4-B precursor     | EVQLVAHSPWLK                  | 2 | 843.9882 | 4.102 | 0.246 |
| 142 | IPI00654875 | 1 | 51   | 1.25 | 0.2  | 7  | 5  | C4B Complement C4-B precursor     | n[145]ASAGLLGAHAAAITA         | 2 | 719.9104 | 2.703 | 0.233 |
| 142 | IPI00654875 | 1 | 51   | 1.25 | 0.2  | 7  | 5  | C4B Complement C4-B precursor     | n[145]GLESQTK[272]            | 2 | 525.8053 | 1.587 | 0.027 |
| 142 | IPI00654875 | 1 | 51   | 1.25 | 0.2  | 7  | 5  | C4B Complement C4-B precursor     | n[145]HLVPGAPFLQA             | 2 | 703.9175 | 2.43  | 0.235 |
| 142 | IPI00654875 | 1 | 51   | 1.25 | 0.2  | 7  | 5  | C4B Complement C4-B precursor     | n[145]CYYP                    | 2 | 446.2023 | 1.893 | 0.223 |
| 142 | IPI00654875 | 1 | 51   | 1.25 | 0.2  | 7  | 5  | C4B Complement C4-B precursor     | n[145]DHAVDLIQK[272]GYM[147]R | 3 | 617.3326 | 2.33  | 0.111 |
| 142 | IPI00654875 | 1 | 51   | 1.25 | 0.2  | 7  | 5  | C4B Complement C4-B precursor     | n[145]LLLHEGK[272]            | 2 | 549.3497 | 2.055 | 0.216 |
| 142 | IPI00654875 | 1 | 51   | 1.25 | 0.2  | 7  | 5  | C4B Complement C4-B precursor     | LLLHEGK                       | 2 | 545.3426 | 2.273 | 0.165 |
| 142 | IPI00654875 | 1 | 51   | 1.25 | 0.2  | 7  | 5  | C4B Complement C4-B precursor     | n[145]LLLFSPSVVHL             | 2 | 684.9222 | 3.02  | 0.269 |
| 142 | IPI00654875 | 1 | 51   | 1.25 | 0.2  | 7  | 5  | C4B Complement C4-B precursor     | n[145]LLLFSPSVVH              | 2 | 628.3802 | 2.685 | 0.21  |
| 142 | IPI00654875 | 1 | 51   | 1.25 | 0.2  | 7  | 5  | C4B Complement C4-B precursor     | YLAPTLAASR                    | 2 | 658.3903 | 2.453 | 0.254 |
| 142 | IPI00654875 | 1 | 51   | 1.25 | 0.2  | 7  | 5  | C4B Complement C4-B precursor     | n[145]LLQALVR                 | 2 | 478.8223 | 2.929 | 0.141 |
| 142 | IPI00654875 | 1 | 51   | 1.25 | 0.2  | 7  | 5  | C4B Complement C4-B precursor     | n[145]LTVAAPPSSGGPGFLSIERPD   | 3 | 709.0518 | 2.138 | 0.292 |
| 142 | IPI00654875 | 1 | 51   | 1.25 | 0.2  | 7  | 5  | C4B Complement C4-B precursor     | n[145]PNMIPDGFNSYVR           | 2 | 884.9259 | 2.47  | 0.185 |
| 142 | IPI00654875 | 1 | 51   | 1.25 | 0.2  | 7  | 5  | C4B Complement C4-B precursor     | n[145]HLVPGAPFLQ              | 2 | 668.3989 | 2.165 | 0.178 |
| 142 | IPI00654875 | 1 | 51   | 1.25 | 0.2  | 7  | 5  | C4B Complement C4-B precursor     | LSGM[147]AIADVTLTSGFHALR      | 3 | 710.0576 | 3.096 | 0.102 |
| 142 | IPI00654875 | 1 | 51   | 1.25 | 0.2  | 7  | 5  | C4B Complement C4-B precursor     | ALLHLLHEGK                    | 3 | 508.6522 | 3.208 | 0.027 |
| 142 | IPI00654875 | 1 | 51   | 1.25 | 0.2  | 7  | 5  | C4B Complement C4-B precursor     | n[145]DDFVIPDISEPGTWK[272]    | 4 | 502.5133 | 2.753 | 0.113 |
| 142 | IPI00654875 | 1 | 51   | 1.25 | 0.2  | 7  | 5  | C4B Complement C4-B precursor     | n[145]LLLFSPSVVHLG            | 2 | 713.433  | 2.199 | 0.322 |
| 142 | IPI00654875 | 1 | 51   | 1.25 | 0.2  | 7  | 5  | C4B Complement C4-B precursor     | LAPTLAASR                     | 2 | 520.3166 | 1.803 | 0.107 |
| 142 | IPI00654875 | 1 | 51   | 1.25 | 0.2  | 7  | 5  | C4B Complement C4-B precursor     | n[145]ITQVLH                  | 2 | 427.7645 | 1.675 | 0.067 |
| 142 | IPI00654875 | 1 | 51   | 1.25 | 0.2  | 7  | 5  | C4B Complement C4-B precursor     | n[145]LAPTLAASR               | 2 | 522.3201 | 1.986 | 0.042 |
| 142 | IPI00654875 | 1 | 51   | 1.25 | 0.2  | 7  | 5  | C4B Complement C4-B precursor     | n[145]HLVPGAPFL               | 2 | 604.3696 | 1.739 | 0.11  |
| 142 | IPI00654875 | 1 | 51   | 1.25 | 0.2  | 7  | 5  | C4B Complement C4-B precursor     | EVQLVAHSPWLK[272]             | 2 | 845.9917 | 3.805 | 0.254 |
| 142 | IPI00654875 | 1 | 51   | 1.25 | 0.2  | 7  | 5  | C4B Complement C4-B precursor     | n[145]FNSYVR                  | 2 | 465.2517 | 1.541 | 0.064 |
| 142 | IPI00654875 | 1 | 51   | 1.25 | 0.2  | 7  | 5  | C4B Complement C4-B precursor     | LTVAAPPSSGGPGFLSIER           | 3 | 637.0229 | 3.062 | 0.261 |
| 142 | IPI00654875 | 1 | 51   | 1.25 | 0.2  | 7  | 5  | C4B Complement C4-B precursor     | SVK[272]                      | 1 | 617.4104 | 0.88  | 0.378 |
| 142 | IPI00654875 | 1 | 51   | 1.25 | 0.2  | 7  | 5  | C4B Complement C4-B precursor     | n[145]GVAHNNLM[147]AM[147]    | 2 | 617.2955 | 1.583 | 0.15  |
| 143 | IPI00654888 | 1 | 40.3 | 0.79 | 0.17 | 62 | 39 | KLKB1 Plasma kallikrein precursor | GCLTQLYENAFFR                 | 2 | 874.4184 | 4.361 | 0.506 |
| 143 | IPI00654888 | 1 | 40.3 | 0.79 | 0.17 | 62 | 39 | KLKB1 Plasma kallikrein precursor | GDSGGPLVCK                    | 2 | 629.8178 | 3.324 | 0.514 |
| 143 | IPI00654888 | 1 | 40.3 | 0.79 | 0.17 | 62 | 39 | KLKB1 Plasma kallikrein precursor | n[145]GCLTQLYENAFFR           | 2 | 876.4219 | 3.76  | 0.42  |
| 143 | IPI00654888 | 1 | 40.3 | 0.79 | 0.17 | 62 | 39 | KLKB1 Plasma kallikrein precursor | n[145]GDSGGPLVCK[272]         | 2 | 633.8249 | 3.283 | 0.423 |
| 143 | IPI00654888 | 1 | 40.3 | 0.79 | 0.17 | 62 | 39 | KLKB1 Plasma kallikrein precursor | n[145]GVNVCQETCTK[272]        | 2 | 781.3579 | 4.353 | 0.511 |
| 143 | IPI00654888 | 1 | 40.3 | 0.79 | 0.17 | 62 | 39 | KLKB1 Plasma kallikrein precursor | n[145]IYSGILNLSIDTK[272]      | 2 | 863.0055 | 4.966 | 0.345 |

|     |             |   |      |      |      |    |    |                                        |                                |   |           |       |       |
|-----|-------------|---|------|------|------|----|----|----------------------------------------|--------------------------------|---|-----------|-------|-------|
| 143 | IPI00654888 | 1 | 40.3 | 0.79 | 0.17 | 62 | 39 | KLKB1 Plasma kallikrein precursor      | n[145]YGTQGSSGYSRLR            | 2 | 710.3529  | 3.522 | 0.545 |
| 143 | IPI00654888 | 1 | 40.3 | 0.79 | 0.17 | 62 | 39 | KLKB1 Plasma kallikrein precursor      | EIIHHQNYK                      | 3 | 479.9453  | 2.875 | 0.336 |
| 143 | IPI00654888 | 1 | 40.3 | 0.79 | 0.17 | 62 | 39 | KLKB1 Plasma kallikrein precursor      | TLPEPCHSK                      | 3 | 446.5617  | 3.089 | 0.245 |
| 143 | IPI00654888 | 1 | 40.3 | 0.79 | 0.17 | 62 | 39 | KLKB1 Plasma kallikrein precursor      | n[145]EIIHHQNYK[272]           | 3 | 482.6167  | 3.467 | 0.291 |
| 143 | IPI00654888 | 1 | 40.3 | 0.79 | 0.17 | 62 | 39 | KLKB1 Plasma kallikrein precursor      | n[145]TLPEPCHSK[272]           | 3 | 449.2331  | 3.233 | 0.078 |
| 143 | IPI00654888 | 1 | 40.3 | 0.79 | 0.17 | 62 | 39 | KLKB1 Plasma kallikrein precursor      | n[145]IAYGTQGSSGYSRLR          | 2 | 802.4135  | 4.105 | 0.4   |
| 143 | IPI00654888 | 1 | 40.3 | 0.79 | 0.17 | 62 | 39 | KLKB1 Plasma kallikrein precursor      | n[145]VSEGNHDIALIK[272]        | 2 | 792.4534  | 4.29  | 0.356 |
| 143 | IPI00654888 | 1 | 40.3 | 0.79 | 0.17 | 62 | 39 | KLKB1 Plasma kallikrein precursor      | VSEGNHDIALIK                   | 2 | 788.4463  | 4.044 | 0.334 |
| 143 | IPI00654888 | 1 | 40.3 | 0.79 | 0.17 | 62 | 39 | KLKB1 Plasma kallikrein precursor      | n[145]EIIHHQNYK[272]           | 2 | 723.4214  | 3.517 | 0.306 |
| 143 | IPI00654888 | 1 | 40.3 | 0.79 | 0.17 | 62 | 39 | KLKB1 Plasma kallikrein precursor      | n[145]VSSVEECQK[272]           | 2 | 671.8329  | 3.17  | 0.387 |
| 143 | IPI00654888 | 1 | 40.3 | 0.79 | 0.17 | 62 | 39 | KLKB1 Plasma kallikrein precursor      | DSVTGTLPK                      | 2 | 599.3456  | 2.531 | 0.303 |
| 143 | IPI00654888 | 1 | 40.3 | 0.79 | 0.17 | 62 | 39 | KLKB1 Plasma kallikrein precursor      | n[145]LCNTGDNSVCTTK[272]       | 2 | 868.3899  | 3.761 | 0.407 |
| 143 | IPI00654888 | 1 | 40.3 | 0.79 | 0.17 | 62 | 39 | KLKB1 Plasma kallikrein precursor      | CLLFSFLPASSINDM[147]EK         | 3 | 753.0404  | 2.882 | 0.227 |
| 143 | IPI00654888 | 1 | 40.3 | 0.79 | 0.17 | 62 | 39 | KLKB1 Plasma kallikrein precursor      | YSPGGTPTAIK                    | 2 | 686.3852  | 2.672 | 0.317 |
| 143 | IPI00654888 | 1 | 40.3 | 0.79 | 0.17 | 62 | 39 | KLKB1 Plasma kallikrein precursor      | n[145]LSM[147]DGSPTTR          | 2 | 562.2803  | 2.766 | 0.241 |
| 143 | IPI00654888 | 1 | 40.3 | 0.79 | 0.17 | 62 | 39 | KLKB1 Plasma kallikrein precursor      | n[145]DACK[272]GDSGGLVCK[272]  | 3 | 625.305   | 3.437 | 0.227 |
| 143 | IPI00654888 | 1 | 40.3 | 0.79 | 0.17 | 62 | 39 | KLKB1 Plasma kallikrein precursor      | n[145]VLTDAFVCR                | 2 | 655.8395  | 1.819 | 0.171 |
| 143 | IPI00654888 | 1 | 40.3 | 0.79 | 0.17 | 62 | 39 | KLKB1 Plasma kallikrein precursor      | n[145]QK[272]PICLPSK[272]      | 3 | 497.9632  | 3.026 | 0.31  |
| 143 | IPI00654888 | 1 | 40.3 | 0.79 | 0.17 | 62 | 39 | KLKB1 Plasma kallikrein precursor      | n[145]DSVTGTLPK[272]           | 2 | 603.3527  | 2.46  | 0.212 |
| 143 | IPI00654888 | 1 | 40.3 | 0.79 | 0.17 | 62 | 39 | KLKB1 Plasma kallikrein precursor      | n[145]EK[272]GEIQNILQK[272]    | 3 | 578.0158  | 3.64  | 0.133 |
| 143 | IPI00654888 | 1 | 40.3 | 0.79 | 0.17 | 62 | 39 | KLKB1 Plasma kallikrein precursor      | VLTDAFVCR                      | 2 | 653.836   | 2.286 | 0.152 |
| 143 | IPI00654888 | 1 | 40.3 | 0.79 | 0.17 | 62 | 39 | KLKB1 Plasma kallikrein precursor      | VSSVEECQK                      | 2 | 667.8258  | 2.038 | 0.14  |
| 143 | IPI00654888 | 1 | 40.3 | 0.79 | 0.17 | 62 | 39 | KLKB1 Plasma kallikrein precursor      | n[145]TLPEPCHSK[272]           | 2 | 673.346   | 2.632 | 0.018 |
| 143 | IPI00654888 | 1 | 40.3 | 0.79 | 0.17 | 62 | 39 | KLKB1 Plasma kallikrein precursor      | LSM[147]DGSPTTR                | 2 | 560.2768  | 1.966 | 0.135 |
| 143 | IPI00654888 | 1 | 40.3 | 0.79 | 0.17 | 62 | 39 | KLKB1 Plasma kallikrein precursor      | DTPFSQIK                       | 2 | 608.3403  | 2.388 | 0.056 |
| 143 | IPI00654888 | 1 | 40.3 | 0.79 | 0.17 | 62 | 39 | KLKB1 Plasma kallikrein precursor      | n[145]YQDYK[272]               | 2 | 502.7682  | 1.53  | 0.045 |
| 143 | IPI00654888 | 1 | 40.3 | 0.79 | 0.17 | 62 | 39 | KLKB1 Plasma kallikrein precursor      | TLPEPCHSK                      | 2 | 669.3389  | 1.909 | 0.01  |
| 143 | IPI00654888 | 1 | 40.3 | 0.79 | 0.17 | 62 | 39 | KLKB1 Plasma kallikrein precursor      | n[145]FGCFLK[272]              | 2 | 524.7818  | 1.698 | 0.02  |
| 143 | IPI00654888 | 1 | 40.3 | 0.79 | 0.17 | 62 | 39 | KLKB1 Plasma kallikrein precursor      | IFQHAFSDVDVAR                  | 3 | 586.6493  | 2.723 | 0.199 |
| 143 | IPI00654888 | 1 | 40.3 | 0.79 | 0.17 | 62 | 39 | KLKB1 Plasma kallikrein precursor      | VSEGNHDIALIK                   | 3 | 525.9666  | 2.106 | 0.015 |
| 143 | IPI00654888 | 1 | 40.3 | 0.79 | 0.17 | 62 | 39 | KLKB1 Plasma kallikrein precursor      | TGAVSGHSLK[272]                | 3 | 414.2425  | 1.66  | 0.04  |
| 143 | IPI00654888 | 1 | 40.3 | 0.79 | 0.17 | 62 | 39 | KLKB1 Plasma kallikrein precursor      | n[145]IFQHAFSDVDVAR            | 3 | 587.985   | 3.132 | 0.149 |
| 143 | IPI00654888 | 1 | 40.3 | 0.79 | 0.17 | 62 | 39 | KLKB1 Plasma kallikrein precursor      | n[145]YSPGGTPTAIK[272]         | 2 | 690.3923  | 1.648 | 0.017 |
| 143 | IPI00654888 | 1 | 40.3 | 0.79 | 0.17 | 62 | 39 | KLKB1 Plasma kallikrein precursor      | n[145]TICTYHPN                 | 2 | 569.7607  | 1.468 | 0.184 |
| 143 | IPI00654888 | 1 | 40.3 | 0.79 | 0.17 | 62 | 39 | KLKB1 Plasma kallikrein precursor      | n[145]AQYCQM[147]R             | 2 | 553.2391  | 1.764 | 0.189 |
| 143 | IPI00654888 | 1 | 40.3 | 0.79 | 0.17 | 62 | 39 | KLKB1 Plasma kallikrein precursor      | n[145]CQFFTY                   | 1 | 998.4233  | 1.511 | 0.238 |
| 144 | IPI00742696 | 1 | 63.7 | 1    | 0.06 | 16 | 93 | GC vitamin D-binding protein precursor | n[145]EFSHLGK[272]             | 1 | 1105.6245 | 2.704 | 0.288 |
| 144 | IPI00742696 | 1 | 63.7 | 1    | 0.06 | 16 | 93 | GC vitamin D-binding protein precursor | CCESASEDCMAK                   | 2 | 847.7958  | 4.096 | 0.606 |
| 144 | IPI00742696 | 1 | 63.7 | 1    | 0.06 | 16 | 93 | GC vitamin D-binding protein precursor | CCESASEDCM[147]AK              | 2 | 855.7933  | 3.887 | 0.695 |
| 144 | IPI00742696 | 1 | 63.7 | 1    | 0.06 | 16 | 93 | GC vitamin D-binding protein precursor | DVCDPGNTK                      | 2 | 637.797   | 3.076 | 0.521 |
| 144 | IPI00742696 | 1 | 63.7 | 1    | 0.06 | 16 | 93 | GC vitamin D-binding protein precursor | GQELCADYSENTFTEYK              | 2 | 1162.5141 | 5.726 | 0.589 |
| 144 | IPI00742696 | 1 | 63.7 | 1    | 0.06 | 16 | 93 | GC vitamin D-binding protein precursor | SCESNSPPVHPGTAECCTK            | 2 | 1256.5164 | 6.319 | 0.642 |
| 144 | IPI00742696 | 1 | 63.7 | 1    | 0.06 | 16 | 93 | GC vitamin D-binding protein precursor | SLGECDDVEDSTTCFNAK             | 2 | 1170.4608 | 4.342 | 0.627 |
| 144 | IPI00742696 | 1 | 63.7 | 1    | 0.06 | 16 | 93 | GC vitamin D-binding protein precursor | VCSQYAAAYGEK                   | 2 | 772.8655  | 3.798 | 0.348 |
| 144 | IPI00742696 | 1 | 63.7 | 1    | 0.06 | 16 | 93 | GC vitamin D-binding protein precursor | VPTADLEDVLPALAEITNILSK         | 2 | 1323.7337 | 4.834 | 0.455 |
| 144 | IPI00742696 | 1 | 63.7 | 1    | 0.06 | 16 | 93 | GC vitamin D-binding protein precursor | n[145]CCESASEDCMAK[272]        | 2 | 851.8029  | 4.28  | 0.646 |
| 144 | IPI00742696 | 1 | 63.7 | 1    | 0.06 | 16 | 93 | GC vitamin D-binding protein precursor | n[145]GQELCADYSENTFTEYK[272]   | 2 | 1166.5212 | 6.078 | 0.616 |
| 144 | IPI00742696 | 1 | 63.7 | 1    | 0.06 | 16 | 93 | GC vitamin D-binding protein precursor | n[145]SCESNSPPVHPGTAECCTK[272] | 2 | 1260.5235 | 5.232 | 0.653 |

|     |             |   |      |   |      |    |    |                                        |                                           |   |           |       |       |
|-----|-------------|---|------|---|------|----|----|----------------------------------------|-------------------------------------------|---|-----------|-------|-------|
| 144 | IPI00742696 | 1 | 63.7 | 1 | 0.06 | 16 | 93 | GC vitamin D-binding protein precursor | n[145]SLGECCDVEDSTTCFNAK[272]             | 2 | 1174.4679 | 4.977 | 0.684 |
| 144 | IPI00742696 | 1 | 63.7 | 1 | 0.06 | 16 | 93 | GC vitamin D-binding protein precursor | n[145]VCSQYAAYGEK[272]                    | 2 | 776.8726  | 4.007 | 0.521 |
| 144 | IPI00742696 | 1 | 63.7 | 1 | 0.06 | 16 | 93 | GC vitamin D-binding protein precursor | n[145]VPTADLEDVLPLAEDITNILSK[272]         | 2 | 1327.7408 | 4.919 | 0.487 |
| 144 | IPI00742696 | 1 | 63.7 | 1 | 0.06 | 16 | 93 | GC vitamin D-binding protein precursor | KFPSGTFEQVSQLVK                           | 3 | 705.7369  | 2.6   | 0.142 |
| 144 | IPI00742696 | 1 | 63.7 | 1 | 0.06 | 16 | 93 | GC vitamin D-binding protein precursor | SCESNSPPFVHPGTAECCCK                      | 3 | 838.0134  | 3.191 | 0.5   |
| 144 | IPI00742696 | 1 | 63.7 | 1 | 0.06 | 16 | 93 | GC vitamin D-binding protein precursor | VPTADLEDVLPLAEDITNILSK                    | 3 | 882.8249  | 3.047 | 0.191 |
| 144 | IPI00742696 | 1 | 63.7 | 1 | 0.06 | 16 | 93 | GC vitamin D-binding protein precursor | n[145]ELSSFIDK[272]GQELCADYSENTFTEYK[272] | 3 | 1132.539  | 7.664 | 0.627 |
| 144 | IPI00742696 | 1 | 63.7 | 1 | 0.06 | 16 | 93 | GC vitamin D-binding protein precursor | n[145]SCESNSPPFVHPGTAECCCK[272]           | 3 | 840.6848  | 3.95  | 0.566 |
| 144 | IPI00742696 | 1 | 63.7 | 1 | 0.06 | 16 | 93 | GC vitamin D-binding protein precursor | n[145]SPFPVHPGTAECCCK[272]                | 3 | 651.9693  | 4.226 | 0.492 |
| 144 | IPI00742696 | 1 | 63.7 | 1 | 0.06 | 16 | 93 | GC vitamin D-binding protein precursor | n[145]VPTADLEDVLPLAEDITNILSK[272]         | 3 | 885.4963  | 2.149 | 0.323 |
| 144 | IPI00742696 | 1 | 63.7 | 1 | 0.06 | 16 | 93 | GC vitamin D-binding protein precursor | AKLPDATPTELAK                             | 3 | 592.3524  | 3.252 | 0.276 |
| 144 | IPI00742696 | 1 | 63.7 | 1 | 0.06 | 16 | 93 | GC vitamin D-binding protein precursor | KLCMAALK                                  | 3 | 448.5957  | 3.176 | 0.253 |
| 144 | IPI00742696 | 1 | 63.7 | 1 | 0.06 | 16 | 93 | GC vitamin D-binding protein precursor | KLCM[147]AALK                             | 3 | 453.9273  | 2.708 | 0.318 |
| 144 | IPI00742696 | 1 | 63.7 | 1 | 0.06 | 16 | 93 | GC vitamin D-binding protein precursor | RTHLPEVFLSK                               | 3 | 536.3191  | 3.15  | 0.347 |
| 144 | IPI00742696 | 1 | 63.7 | 1 | 0.06 | 16 | 93 | GC vitamin D-binding protein precursor | n[145]THLPEVFLSK[272]                     | 3 | 486.9568  | 2.858 | 0.163 |
| 144 | IPI00742696 | 1 | 63.7 | 1 | 0.06 | 16 | 93 | GC vitamin D-binding protein precursor | n[145]HQPQEFPTYVEPTNDEICEAFR              | 4 | 710.8249  | 2.721 | 0.286 |
| 144 | IPI00742696 | 1 | 63.7 | 1 | 0.06 | 16 | 93 | GC vitamin D-binding protein precursor | KFPSGTFEQVSQLVK                           | 2 | 1058.1017 | 3.827 | 0.349 |
| 144 | IPI00742696 | 1 | 63.7 | 1 | 0.06 | 16 | 93 | GC vitamin D-binding protein precursor | RTHLPEVFLSK                               | 2 | 803.9751  | 3.523 | 0.431 |
| 144 | IPI00742696 | 1 | 63.7 | 1 | 0.06 | 16 | 93 | GC vitamin D-binding protein precursor | n[145]RTHLPEVFLSK[272]                    | 2 | 807.9822  | 3.92  | 0.36  |
| 144 | IPI00742696 | 1 | 63.7 | 1 | 0.06 | 16 | 93 | GC vitamin D-binding protein precursor | LCDNLSTK                                  | 2 | 610.3123  | 2.919 | 0.285 |
| 144 | IPI00742696 | 1 | 63.7 | 1 | 0.06 | 16 | 93 | GC vitamin D-binding protein precursor | n[145]EDFTSLSLVLYSR                       | 2 | 837.447   | 3.736 | 0.323 |
| 144 | IPI00742696 | 1 | 63.7 | 1 | 0.06 | 16 | 93 | GC vitamin D-binding protein precursor | n[145]EFSHLGK[272]                        | 2 | 553.3159  | 2.958 | 0.263 |
| 144 | IPI00742696 | 1 | 63.7 | 1 | 0.06 | 16 | 93 | GC vitamin D-binding protein precursor | n[145]HLSLLTTLNLR                         | 2 | 699.9129  | 3.504 | 0.264 |
| 144 | IPI00742696 | 1 | 63.7 | 1 | 0.06 | 16 | 93 | GC vitamin D-binding protein precursor | n[145]LCDNLSTK[272]                       | 2 | 614.3194  | 2.937 | 0.277 |
| 144 | IPI00742696 | 1 | 63.7 | 1 | 0.06 | 16 | 93 | GC vitamin D-binding protein precursor | FPSGTFEQVSQLVK                            | 3 | 616.3403  | 2.872 | 0.234 |
| 144 | IPI00742696 | 1 | 63.7 | 1 | 0.06 | 16 | 93 | GC vitamin D-binding protein precursor | KELSSFIDK                                 | 3 | 496.2925  | 3.188 | 0.172 |
| 144 | IPI00742696 | 1 | 63.7 | 1 | 0.06 | 16 | 93 | GC vitamin D-binding protein precursor | n[145]ELSSFIDK[272]                       | 1 | 1226.6872 | 2.552 | 0.242 |
| 144 | IPI00742696 | 1 | 63.7 | 1 | 0.06 | 16 | 93 | GC vitamin D-binding protein precursor | n[145]DVCDPGNTK[272]                      | 2 | 641.8041  | 2.877 | 0.309 |
| 144 | IPI00742696 | 1 | 63.7 | 1 | 0.06 | 16 | 93 | GC vitamin D-binding protein precursor | THLPEVFLSK                                | 3 | 484.2854  | 3.114 | 0.172 |
| 144 | IPI00742696 | 1 | 63.7 | 1 | 0.06 | 16 | 93 | GC vitamin D-binding protein precursor | n[145]LCDNLSTK[272]                       | 1 | 1227.6316 | 2.532 | 0.237 |
| 144 | IPI00742696 | 1 | 63.7 | 1 | 0.06 | 16 | 93 | GC vitamin D-binding protein precursor | ELSSFIDK                                  | 2 | 609.8401  | 3.559 | 0.188 |
| 144 | IPI00742696 | 1 | 63.7 | 1 | 0.06 | 16 | 93 | GC vitamin D-binding protein precursor | n[145]ELSSFIDK[272]                       | 2 | 613.8472  | 2.449 | 0.126 |
| 144 | IPI00742696 | 1 | 63.7 | 1 | 0.06 | 16 | 93 | GC vitamin D-binding protein precursor | n[145]FPSGTFEQVSQLVK[272]                 | 3 | 619.0117  | 3.158 | 0.238 |
| 144 | IPI00742696 | 1 | 63.7 | 1 | 0.06 | 16 | 93 | GC vitamin D-binding protein precursor | n[145]VM[147]DK[272]YTFELSR               | 3 | 564.9672  | 2.108 | 0.36  |
| 144 | IPI00742696 | 1 | 63.7 | 1 | 0.06 | 16 | 93 | GC vitamin D-binding protein precursor | ELSSFIDK                                  | 1 | 1218.673  | 2.311 | 0.242 |
| 144 | IPI00742696 | 1 | 63.7 | 1 | 0.06 | 16 | 93 | GC vitamin D-binding protein precursor | YTFELSR                                   | 1 | 1055.5521 | 2.382 | 0.255 |
| 144 | IPI00742696 | 1 | 63.7 | 1 | 0.06 | 16 | 93 | GC vitamin D-binding protein precursor | n[145]DVCDPGNTK[272]                      | 1 | 1282.601  | 2.107 | 0.413 |
| 144 | IPI00742696 | 1 | 63.7 | 1 | 0.06 | 16 | 93 | GC vitamin D-binding protein precursor | EFSHLGK                                   | 2 | 549.3088  | 2.484 | 0.267 |
| 144 | IPI00742696 | 1 | 63.7 | 1 | 0.06 | 16 | 93 | GC vitamin D-binding protein precursor | ELPEHTVK                                  | 2 | 616.8535  | 2.508 | 0.153 |
| 144 | IPI00742696 | 1 | 63.7 | 1 | 0.06 | 16 | 93 | GC vitamin D-binding protein precursor | n[145]THLPEVFLSK[272]                     | 2 | 729.9316  | 2.826 | 0.292 |
| 144 | IPI00742696 | 1 | 63.7 | 1 | 0.06 | 16 | 93 | GC vitamin D-binding protein precursor | n[145]AK[272]LPDATPTELAK[272]             | 3 | 596.3595  | 2.987 | 0.269 |
| 144 | IPI00742696 | 1 | 63.7 | 1 | 0.06 | 16 | 93 | GC vitamin D-binding protein precursor | n[145]VLEPTLK[272]                        | 1 | 1087.6966 | 2.065 | 0.184 |
| 144 | IPI00742696 | 1 | 63.7 | 1 | 0.06 | 16 | 93 | GC vitamin D-binding protein precursor | n[145]RTHLPEVFLSK[272]                    | 3 | 538.9905  | 2.521 | 0.21  |
| 144 | IPI00742696 | 1 | 63.7 | 1 | 0.06 | 16 | 93 | GC vitamin D-binding protein precursor | n[145]VPTADLEDVLPLAEDITNILSK[272]         | 4 | 664.374   | 3.07  | 0.015 |
| 144 | IPI00742696 | 1 | 63.7 | 1 | 0.06 | 16 | 93 | GC vitamin D-binding protein precursor | n[145]ELPEHTVK[272]                       | 2 | 620.8606  | 2.22  | 0.177 |
| 144 | IPI00742696 | 1 | 63.7 | 1 | 0.06 | 16 | 93 | GC vitamin D-binding protein precursor | NSKFEDCCQEK                               | 3 | 614.9384  | 2.917 | 0.249 |
| 144 | IPI00742696 | 1 | 63.7 | 1 | 0.06 | 16 | 93 | GC vitamin D-binding protein precursor | n[145]YTFELSR                             | 1 | 1059.5592 | 2.028 | 0.197 |
| 144 | IPI00742696 | 1 | 63.7 | 1 | 0.06 | 16 | 93 | GC vitamin D-binding protein precursor | THLPEVFLSK                                | 2 | 725.9245  | 2.577 | 0.285 |

|     |             |   |      |      |      |    |    |                                              |                                 |   |           |       |       |
|-----|-------------|---|------|------|------|----|----|----------------------------------------------|---------------------------------|---|-----------|-------|-------|
| 144 | IPI00742696 | 1 | 63.7 | 1    | 0.06 | 16 | 93 | GC vitamin D-binding protein precursor       | VLEPTLK                         | 2 | 540.3448  | 2.119 | 0.244 |
| 144 | IPI00742696 | 1 | 63.7 | 1    | 0.06 | 16 | 93 | GC vitamin D-binding protein precursor       | n[145]VLEPTLK[272]              | 2 | 544.3519  | 2.321 | 0.122 |
| 144 | IPI00742696 | 1 | 63.7 | 1    | 0.06 | 16 | 93 | GC vitamin D-binding protein precursor       | n[145]FEDCCQEK[272]             | 1 | 1381.5499 | 2.155 | 0.345 |
| 144 | IPI00742696 | 1 | 63.7 | 1    | 0.06 | 16 | 93 | GC vitamin D-binding protein precursor       | KLCM[147]AALK                   | 2 | 680.3873  | 2.549 | 0.253 |
| 144 | IPI00742696 | 1 | 63.7 | 1    | 0.06 | 16 | 93 | GC vitamin D-binding protein precursor       | n[145]TSALSAK[272]              | 2 | 483.2972  | 2.861 | 0.135 |
| 144 | IPI00742696 | 1 | 63.7 | 1    | 0.06 | 16 | 93 | GC vitamin D-binding protein precursor       | n[145]YTFELSR                   | 2 | 530.2832  | 2.117 | 0.101 |
| 144 | IPI00742696 | 1 | 63.7 | 1    | 0.06 | 16 | 93 | GC vitamin D-binding protein precursor       | LPDATPTELAK                     | 2 | 718.4114  | 2.562 | 0.232 |
| 144 | IPI00742696 | 1 | 63.7 | 1    | 0.06 | 16 | 93 | GC vitamin D-binding protein precursor       | AKLPDATPTELAK                   | 2 | 888.025   | 4.185 | 0.35  |
| 144 | IPI00742696 | 1 | 63.7 | 1    | 0.06 | 16 | 93 | GC vitamin D-binding protein precursor       | n[145]LPDATPTELAK[272]          | 2 | 722.4185  | 2.549 | 0.241 |
| 144 | IPI00742696 | 1 | 63.7 | 1    | 0.06 | 16 | 93 | GC vitamin D-binding protein precursor       | FEDCCQEK                        | 2 | 687.2715  | 2.27  | 0.214 |
| 144 | IPI00742696 | 1 | 63.7 | 1    | 0.06 | 16 | 93 | GC vitamin D-binding protein precursor       | n[145]HLSLLTTLNLR               | 3 | 466.9444  | 2.137 | 0.188 |
| 144 | IPI00742696 | 1 | 63.7 | 1    | 0.06 | 16 | 93 | GC vitamin D-binding protein precursor       | KLCMAALK                        | 2 | 672.3899  | 2.503 | 0.13  |
| 144 | IPI00742696 | 1 | 63.7 | 1    | 0.06 | 16 | 93 | GC vitamin D-binding protein precursor       | TSALSAK                         | 2 | 479.2901  | 2.554 | 0.043 |
| 144 | IPI00742696 | 1 | 63.7 | 1    | 0.06 | 16 | 93 | GC vitamin D-binding protein precursor       | n[145]ELPEHTVK[272]             | 3 | 414.2428  | 1.535 | 0.027 |
| 144 | IPI00742696 | 1 | 63.7 | 1    | 0.06 | 16 | 93 | GC vitamin D-binding protein precursor       | n[145]AK[272]LPDATPTELAK[272]   | 2 | 894.0356  | 3.474 | 0.189 |
| 144 | IPI00742696 | 1 | 63.7 | 1    | 0.06 | 16 | 93 | GC vitamin D-binding protein precursor       | KFPSGTFEQVSQLVK                 | 4 | 529.5545  | 2.217 | 0.113 |
| 144 | IPI00742696 | 1 | 63.7 | 1    | 0.06 | 16 | 93 | GC vitamin D-binding protein precursor       | YTFELSR                         | 2 | 528.2797  | 2.135 | 0.055 |
| 144 | IPI00742696 | 1 | 63.7 | 1    | 0.06 | 16 | 93 | GC vitamin D-binding protein precursor       | n[145]VM[147]DK[272]YTFELSR     | 2 | 846.9471  | 2.245 | 0.276 |
| 144 | IPI00742696 | 1 | 63.7 | 1    | 0.06 | 16 | 93 | GC vitamin D-binding protein precursor       | ELPEHTVK                        | 3 | 411.5714  | 1.93  | 0.068 |
| 144 | IPI00742696 | 1 | 63.7 | 1    | 0.06 | 16 | 93 | GC vitamin D-binding protein precursor       | n[145]SCESNSPPFVHPG             | 2 | 774.3406  | 3.567 | 0.441 |
| 144 | IPI00742696 | 1 | 63.7 | 1    | 0.06 | 16 | 93 | GC vitamin D-binding protein precursor       | n[145]EFSHLGK[272]              | 3 | 369.213   | 1.646 | 0.126 |
| 144 | IPI00742696 | 1 | 63.7 | 1    | 0.06 | 16 | 93 | GC vitamin D-binding protein precursor       | n[145]FEDCCQEK[272]             | 2 | 691.2786  | 1.373 | 0.05  |
| 144 | IPI00742696 | 1 | 63.7 | 1    | 0.06 | 16 | 93 | GC vitamin D-binding protein precursor       | n[145]SLGECCDVEDSTTCFNAK[272]   | 3 | 783.3144  | 1.966 | 0.144 |
| 144 | IPI00742696 | 1 | 63.7 | 1    | 0.06 | 16 | 93 | GC vitamin D-binding protein precursor       | EFSHLGK                         | 3 | 366.5416  | 2.061 | 0.021 |
| 144 | IPI00742696 | 1 | 63.7 | 1    | 0.06 | 16 | 93 | GC vitamin D-binding protein precursor       | n[145]SLLVSYTK[272]             | 2 | 599.8679  | 2.948 | 0.182 |
| 144 | IPI00742696 | 1 | 63.7 | 1    | 0.06 | 16 | 93 | GC vitamin D-binding protein precursor       | n[145]NSK[272]FEDCCQEK[272]     | 3 | 618.9455  | 2.241 | 0.12  |
| 144 | IPI00742696 | 1 | 63.7 | 1    | 0.06 | 16 | 93 | GC vitamin D-binding protein precursor       | n[145]CCESASEDCM[147]AK[272]    | 2 | 859.8004  | 2.133 | 0.363 |
| 144 | IPI00742696 | 1 | 63.7 | 1    | 0.06 | 16 | 93 | GC vitamin D-binding protein precursor       | n[145]DATPTELAK[272]            | 2 | 617.3501  | 3.013 | 0.2   |
| 144 | IPI00742696 | 1 | 63.7 | 1    | 0.06 | 16 | 93 | GC vitamin D-binding protein precursor       | n[145]VMDK[272]YTFELSR          | 3 | 559.6355  | 2.342 | 0.066 |
| 144 | IPI00742696 | 1 | 63.7 | 1    | 0.06 | 16 | 93 | GC vitamin D-binding protein precursor       | DATPTELAK                       | 2 | 613.343   | 2.721 | 0.145 |
| 144 | IPI00742696 | 1 | 63.7 | 1    | 0.06 | 16 | 93 | GC vitamin D-binding protein precursor       | VMDKYTFELSR                     | 3 | 556.9641  | 2.082 | 0.036 |
| 144 | IPI00742696 | 1 | 63.7 | 1    | 0.06 | 16 | 93 | GC vitamin D-binding protein precursor       | n[145]SCESNSPPFVHPGTA           | 2 | 860.383   | 2.361 | 0.182 |
| 144 | IPI00742696 | 1 | 63.7 | 1    | 0.06 | 16 | 93 | GC vitamin D-binding protein precursor       | n[145]GPLLK[272]K[272]          | 3 | 363.257   | 1.257 | 0.134 |
| 144 | IPI00742696 | 1 | 63.7 | 1    | 0.06 | 16 | 93 | GC vitamin D-binding protein precursor       | n[145]SCESNSPPFVHPGTAECCTK[272] | 4 | 630.7654  | 2.044 | 0.025 |
| 144 | IPI00742696 | 1 | 63.7 | 1    | 0.06 | 16 | 93 | GC vitamin D-binding protein precursor       | n[145]HQPQEFPTYVEPTNDEICEAFR    | 3 | 947.4307  | 2.939 | 0.094 |
| 144 | IPI00742696 | 1 | 63.7 | 1    | 0.06 | 16 | 93 | GC vitamin D-binding protein precursor       | FM[147]PAAQLPELDPVELPTNK        | 3 | 802.7628  | 2.851 | 0.009 |
| 145 | IPI00743766 | 1 | 14.7 | 0.89 | 0.03 | 8  | 7  | FETUB Fetuin-B precursor                     | n[145]AIFYM[147]NNPSR           | 2 | 686.8436  | 3.072 | 0.387 |
| 145 | IPI00743766 | 1 | 14.7 | 0.89 | 0.03 | 8  | 7  | FETUB Fetuin-B precursor                     | n[145]IFFESVYGQCK[272]          | 2 | 827.9142  | 3.045 | 0.373 |
| 145 | IPI00743766 | 1 | 14.7 | 0.89 | 0.03 | 8  | 7  | FETUB Fetuin-B precursor                     | AIFYM[147]NNPSR                 | 2 | 684.8401  | 2.707 | 0.26  |
| 145 | IPI00743766 | 1 | 14.7 | 0.89 | 0.03 | 8  | 7  | FETUB Fetuin-B precursor                     | n[145]LVVLPFPK[272]             | 2 | 600.9016  | 2.487 | 0.164 |
| 145 | IPI00743766 | 1 | 14.7 | 0.89 | 0.03 | 8  | 7  | FETUB Fetuin-B precursor                     | LVVLPFPK                        | 2 | 596.8945  | 2.773 | 0.139 |
| 145 | IPI00743766 | 1 | 14.7 | 0.89 | 0.03 | 8  | 7  | FETUB Fetuin-B precursor                     | n[145]VNDAAQEYR                 | 2 | 569.7841  | 1.871 | 0.113 |
| 145 | IPI00743766 | 1 | 14.7 | 0.89 | 0.03 | 8  | 7  | FETUB Fetuin-B precursor                     | GCNDSVDVLAVAGFALR               | 2 | 897.4373  | 2.513 | 0.126 |
| 145 | IPI00743766 | 1 | 14.7 | 0.89 | 0.03 | 8  | 7  | FETUB Fetuin-B precursor                     | SK[272]K[272]                   | 2 | 395.7731  | 0.913 | 0.136 |
| 146 | IPI00746623 | 1 | 16.1 | 0.69 | 0.06 | 15 | 14 | HABP2 Hyaluronan-binding protein 2 precursor | n[145]GQCLITQSPYYR              | 2 | 858.4219  | 4.031 | 0.542 |
| 146 | IPI00746623 | 1 | 16.1 | 0.69 | 0.06 | 15 | 14 | HABP2 Hyaluronan-binding protein 2 precursor | n[145]LK[272]PVDGHCALESK[272]   | 3 | 625.6779  | 3.999 | 0.414 |
| 146 | IPI00746623 | 1 | 16.1 | 0.69 | 0.06 | 15 | 14 | HABP2 Hyaluronan-binding protein 2 precursor | n[145]LK[272]PVDGHCALESK[272]   | 4 | 469.5103  | 3.467 | 0.486 |
| 146 | IPI00746623 | 1 | 16.1 | 0.69 | 0.06 | 15 | 14 | HABP2 Hyaluronan-binding protein 2 precursor | KEEFHEQSFR                      | 3 | 539.6109  | 3.534 | 0.301 |

|     |             |   |      |      |      |     |    |                                              |                                |   |           |       |       |
|-----|-------------|---|------|------|------|-----|----|----------------------------------------------|--------------------------------|---|-----------|-------|-------|
| 146 | IPI00746623 | 1 | 16.1 | 0.69 | 0.06 | 15  | 14 | HABP2 Hyaluronan-binding protein 2 precursor | LKPVDGHCALESK                  | 3 | 621.6708  | 3.384 | 0.339 |
| 146 | IPI00746623 | 1 | 16.1 | 0.69 | 0.06 | 15  | 14 | HABP2 Hyaluronan-binding protein 2 precursor | n[145]RPGVYTQVTK[272]          | 3 | 479.6203  | 3.296 | 0.312 |
| 146 | IPI00746623 | 1 | 16.1 | 0.69 | 0.06 | 15  | 14 | HABP2 Hyaluronan-binding protein 2 precursor | RPGVYTQVTK                     | 3 | 476.9489  | 3.542 | 0.197 |
| 146 | IPI00746623 | 1 | 16.1 | 0.69 | 0.06 | 15  | 14 | HABP2 Hyaluronan-binding protein 2 precursor | LKPVDGHCALESK                  | 4 | 466.505   | 3.397 | 0.185 |
| 146 | IPI00746623 | 1 | 16.1 | 0.69 | 0.06 | 15  | 14 | HABP2 Hyaluronan-binding protein 2 precursor | NPDADEKPCWCFIK                 | 3 | 677.006   | 2.807 | 0.245 |
| 146 | IPI00746623 | 1 | 16.1 | 0.69 | 0.06 | 15  | 14 | HABP2 Hyaluronan-binding protein 2 precursor | n[145]RPGVYTQVTK[272]          | 2 | 718.9269  | 2.751 | 0.189 |
| 146 | IPI00746623 | 1 | 16.1 | 0.69 | 0.06 | 15  | 14 | HABP2 Hyaluronan-binding protein 2 precursor | n[145]LIANTLCSNR               | 2 | 647.84    | 2.672 | 0.269 |
| 146 | IPI00746623 | 1 | 16.1 | 0.69 | 0.06 | 15  | 14 | HABP2 Hyaluronan-binding protein 2 precursor | VVLGDQDLK                      | 2 | 633.8745  | 2.765 | 0.243 |
| 146 | IPI00746623 | 1 | 16.1 | 0.69 | 0.06 | 15  | 14 | HABP2 Hyaluronan-binding protein 2 precursor | n[145]QLLDAK[272]              | 2 | 488.3075  | 1.76  | 0.087 |
| 146 | IPI00746623 | 1 | 16.1 | 0.69 | 0.06 | 15  | 14 | HABP2 Hyaluronan-binding protein 2 precursor | n[145]VVLGDQDLK[272]           | 2 | 637.8816  | 2.115 | 0.126 |
| 146 | IPI00746623 | 1 | 16.1 | 0.69 | 0.06 | 15  | 14 | HABP2 Hyaluronan-binding protein 2 precursor | n[145]DIALK[272]               | 2 | 480.8203  | 1.803 | 1     |
| 147 | IPI00783987 | 1 | 76.9 | 0.72 | 0.09 | 992 | ## | C3 Complement C3 precursor (Fragment)        | AELQCPQPA                      | 1 | 1213.5704 | 2.41  | 0.511 |
| 147 | IPI00783987 | 1 | 76.9 | 0.72 | 0.09 | 992 | ## | C3 Complement C3 precursor (Fragment)        | GYTQQLAFR                      | 1 | 1223.6532 | 2.674 | 0.365 |
| 147 | IPI00783987 | 1 | 76.9 | 0.72 | 0.09 | 992 | ## | C3 Complement C3 precursor (Fragment)        | VVLVAVDK                       | 1 | 1122.7246 | 2.728 | 0.362 |
| 147 | IPI00783987 | 1 | 76.9 | 0.72 | 0.09 | 992 | ## | C3 Complement C3 precursor (Fragment)        | n[145]AELQCPQPA                | 1 | 1217.5775 | 2.368 | 0.49  |
| 147 | IPI00783987 | 1 | 76.9 | 0.72 | 0.09 | 992 | ## | C3 Complement C3 precursor (Fragment)        | n[145]VVLVAVDK[272]            | 1 | 1130.7388 | 2.805 | 0.36  |
| 147 | IPI00783987 | 1 | 76.9 | 0.72 | 0.09 | 992 | ## | C3 Complement C3 precursor (Fragment)        | ACEPGVDYVYK                    | 2 | 785.3757  | 3.48  | 0.417 |
| 147 | IPI00783987 | 1 | 76.9 | 0.72 | 0.09 | 992 | ## | C3 Complement C3 precursor (Fragment)        | ADIGCTPGSGK                    | 2 | 666.326   | 3.782 | 0.458 |
| 147 | IPI00783987 | 1 | 76.9 | 0.72 | 0.09 | 992 | ## | C3 Complement C3 precursor (Fragment)        | AYYENSPQQVFSTFEVK              | 2 | 1223.5999 | 5.239 | 0.474 |
| 147 | IPI00783987 | 1 | 76.9 | 0.72 | 0.09 | 992 | ## | C3 Complement C3 precursor (Fragment)        | CAEENCFIQK                     | 2 | 778.8401  | 4.004 | 0.496 |
| 147 | IPI00783987 | 1 | 76.9 | 0.72 | 0.09 | 992 | ## | C3 Complement C3 precursor (Fragment)        | DICEEQVNSLPGSITK               | 2 | 1030.0136 | 4.598 | 0.506 |
| 147 | IPI00783987 | 1 | 76.9 | 0.72 | 0.09 | 992 | ## | C3 Complement C3 precursor (Fragment)        | DSCVGSVLVK                     | 2 | 666.8544  | 3.015 | 0.402 |
| 147 | IPI00783987 | 1 | 76.9 | 0.72 | 0.09 | 992 | ## | C3 Complement C3 precursor (Fragment)        | ENEGFTVTAEGK                   | 2 | 781.3965  | 5.037 | 0.468 |
| 147 | IPI00783987 | 1 | 76.9 | 0.72 | 0.09 | 992 | ## | C3 Complement C3 precursor (Fragment)        | EVVADSVWVDVK                   | 2 | 813.4485  | 5.332 | 0.423 |
| 147 | IPI00783987 | 1 | 76.9 | 0.72 | 0.09 | 992 | ## | C3 Complement C3 precursor (Fragment)        | EYVLPSFEVIVEPTEK               | 2 | 1080.0854 | 4.231 | 0.456 |
| 147 | IPI00783987 | 1 | 76.9 | 0.72 | 0.09 | 992 | ## | C3 Complement C3 precursor (Fragment)        | KQELSEAEQATR                   | 2 | 835.4471  | 2.255 | 0.197 |
| 147 | IPI00783987 | 1 | 76.9 | 0.72 | 0.09 | 992 | ## | C3 Complement C3 precursor (Fragment)        | M[147]VFQALAQYQK               | 2 | 811.9398  | 4.192 | 0.408 |
| 147 | IPI00783987 | 1 | 76.9 | 0.72 | 0.09 | 992 | ## | C3 Complement C3 precursor (Fragment)        | SEETKENEGFTVTAEGK              | 2 | 1138.5739 | 6.352 | 0.496 |
| 147 | IPI00783987 | 1 | 76.9 | 0.72 | 0.09 | 992 | ## | C3 Complement C3 precursor (Fragment)        | SGIPIVTSPIYQIHFTK              | 2 | 1034.5832 | 4.849 | 0.534 |
| 147 | IPI00783987 | 1 | 76.9 | 0.72 | 0.09 | 992 | ## | C3 Complement C3 precursor (Fragment)        | SITDFIPFSR                     | 2 | 712.3827  | 3.362 | 0.442 |
| 147 | IPI00783987 | 1 | 76.9 | 0.72 | 0.09 | 992 | ## | C3 Complement C3 precursor (Fragment)        | SSLSVPYVIVPLK                  | 2 | 841.5162  | 2.652 | 0.28  |
| 147 | IPI00783987 | 1 | 76.9 | 0.72 | 0.09 | 992 | ## | C3 Complement C3 precursor (Fragment)        | TVMVNIENPEGIPVK                | 2 | 960.5348  | 3.991 | 0.463 |
| 147 | IPI00783987 | 1 | 76.9 | 0.72 | 0.09 | 992 | ## | C3 Complement C3 precursor (Fragment)        | VELLHNP AFC SLATTK             | 2 | 1035.5474 | 4.87  | 0.573 |
| 147 | IPI00783987 | 1 | 76.9 | 0.72 | 0.09 | 992 | ## | C3 Complement C3 precursor (Fragment)        | VHQYFNVELIQPGAVK               | 2 | 1061.5941 | 6.151 | 0.544 |
| 147 | IPI00783987 | 1 | 76.9 | 0.72 | 0.09 | 992 | ## | C3 Complement C3 precursor (Fragment)        | VPVAVQGEDTVQSLTQGDGVAK         | 2 | 1239.6636 | 6.357 | 0.568 |
| 147 | IPI00783987 | 1 | 76.9 | 0.72 | 0.09 | 992 | ## | C3 Complement C3 precursor (Fragment)        | VQLSNDFDEYIMAIEQTIK            | 2 | 1269.1515 | 7.288 | 0.584 |
| 147 | IPI00783987 | 1 | 76.9 | 0.72 | 0.09 | 992 | ## | C3 Complement C3 precursor (Fragment)        | VQLSNDFDEYIM[147]AIEQTIK       | 2 | 1277.1489 | 6.258 | 0.58  |
| 147 | IPI00783987 | 1 | 76.9 | 0.72 | 0.09 | 992 | ## | C3 Complement C3 precursor (Fragment)        | VSHSEDDCLAFK                   | 2 | 838.8922  | 2.222 | 0.054 |
| 147 | IPI00783987 | 1 | 76.9 | 0.72 | 0.09 | 992 | ## | C3 Complement C3 precursor (Fragment)        | n[145]AAVYHHFISDGVR            | 2 | 808.4267  | 4.137 | 0.487 |
| 147 | IPI00783987 | 1 | 76.9 | 0.72 | 0.09 | 992 | ## | C3 Complement C3 precursor (Fragment)        | n[145]ACEPGVDYVYK[272]         | 2 | 789.3828  | 3.475 | 0.467 |
| 147 | IPI00783987 | 1 | 76.9 | 0.72 | 0.09 | 992 | ## | C3 Complement C3 precursor (Fragment)        | n[145]AGDFLEANYMNLQR           | 2 | 893.4392  | 4.428 | 0.397 |
| 147 | IPI00783987 | 1 | 76.9 | 0.72 | 0.09 | 992 | ## | C3 Complement C3 precursor (Fragment)        | n[145]AVYHHFISDGVR             | 2 | 772.9082  | 4.119 | 0.458 |
| 147 | IPI00783987 | 1 | 76.9 | 0.72 | 0.09 | 992 | ## | C3 Complement C3 precursor (Fragment)        | n[145]AYYENSPQQVFSTFEVK[272]   | 2 | 1227.607  | 6.043 | 0.594 |
| 147 | IPI00783987 | 1 | 76.9 | 0.72 | 0.09 | 992 | ## | C3 Complement C3 precursor (Fragment)        | n[145]AYYTLIGASGQR             | 2 | 722.3893  | 4.625 | 0.437 |
| 147 | IPI00783987 | 1 | 76.9 | 0.72 | 0.09 | 992 | ## | C3 Complement C3 precursor (Fragment)        | n[145]CAEENCFIQK[272]          | 2 | 782.8472  | 3.311 | 0.414 |
| 147 | IPI00783987 | 1 | 76.9 | 0.72 | 0.09 | 992 | ## | C3 Complement C3 precursor (Fragment)        | n[145]DICEEQVNSLPGSITK[272]    | 2 | 1034.0207 | 3.822 | 0.479 |
| 147 | IPI00783987 | 1 | 76.9 | 0.72 | 0.09 | 992 | ## | C3 Complement C3 precursor (Fragment)        | n[145]DSCVGSVLVK[272]          | 2 | 670.8615  | 3.391 | 0.186 |
| 147 | IPI00783987 | 1 | 76.9 | 0.72 | 0.09 | 992 | ## | C3 Complement C3 precursor (Fragment)        | n[145]DYAGVFS DAGLTFTSSSGQQAQR | 2 | 1319.6287 | 4.738 | 0.524 |

|     |             |   |      |      |      |     |    |                                       |                                     |   |           |       |       |
|-----|-------------|---|------|------|------|-----|----|---------------------------------------|-------------------------------------|---|-----------|-------|-------|
| 147 | IPI00783987 | 1 | 76.9 | 0.72 | 0.09 | 992 | ## | C3 Complement C3 precursor (Fragment) | n[145]ENEGFTVTAEGK[272]             | 2 | 785.4036  | 4.941 | 0.435 |
| 147 | IPI00783987 | 1 | 76.9 | 0.72 | 0.09 | 992 | ## | C3 Complement C3 precursor (Fragment) | n[145]EPGQDLVVLPLSITDFIPFSFR        | 2 | 1294.7083 | 4.537 | 0.466 |
| 147 | IPI00783987 | 1 | 76.9 | 0.72 | 0.09 | 992 | ## | C3 Complement C3 precursor (Fragment) | n[145]EYVADSVVVDVK[272]             | 2 | 817.4556  | 4.995 | 0.466 |
| 147 | IPI00783987 | 1 | 76.9 | 0.72 | 0.09 | 992 | ## | C3 Complement C3 precursor (Fragment) | n[145]EYVLPSEFVIVTEK[272]           | 2 | 1084.0925 | 5.461 | 0.455 |
| 147 | IPI00783987 | 1 | 76.9 | 0.72 | 0.09 | 992 | ## | C3 Complement C3 precursor (Fragment) | n[145]FVTVQATFGTQVVEK[272]          | 2 | 971.5481  | 5.407 | 0.499 |
| 147 | IPI00783987 | 1 | 76.9 | 0.72 | 0.09 | 992 | ## | C3 Complement C3 precursor (Fragment) | n[145]GQDLVVLPLSITDFIPFSFR          | 2 | 1181.6606 | 5.343 | 0.499 |
| 147 | IPI00783987 | 1 | 76.9 | 0.72 | 0.09 | 992 | ## | C3 Complement C3 precursor (Fragment) | n[145]GQGTLVVTM[147]YH              | 2 | 726.8673  | 4.106 | 0.459 |
| 147 | IPI00783987 | 1 | 76.9 | 0.72 | 0.09 | 992 | ## | C3 Complement C3 precursor (Fragment) | n[145]GQGTLVVTM[147]YHAK[272]       | 2 | 898.4844  | 4.314 | 0.458 |
| 147 | IPI00783987 | 1 | 76.9 | 0.72 | 0.09 | 992 | ## | C3 Complement C3 precursor (Fragment) | n[145]HLIVTPSGCGE                   | 2 | 651.8188  | 2.835 | 0.427 |
| 147 | IPI00783987 | 1 | 76.9 | 0.72 | 0.09 | 992 | ## | C3 Complement C3 precursor (Fragment) | n[145]IAGYALAQM[147]GR              | 2 | 655.854   | 3.719 | 0.448 |
| 147 | IPI00783987 | 1 | 76.9 | 0.72 | 0.09 | 992 | ## | C3 Complement C3 precursor (Fragment) | n[145]ILLQGTTPVAQMTEDAVER           | 2 | 1151.0975 | 5.661 | 0.6   |
| 147 | IPI00783987 | 1 | 76.9 | 0.72 | 0.09 | 992 | ## | C3 Complement C3 precursor (Fragment) | n[145]ILLQGTTPVAQM[147]TEDAVER      | 2 | 1159.0949 | 5.103 | 0.579 |
| 147 | IPI00783987 | 1 | 76.9 | 0.72 | 0.09 | 992 | ## | C3 Complement C3 precursor (Fragment) | n[145]LVAYTTLIGASGQR                | 2 | 828.4655  | 4.811 | 0.555 |
| 147 | IPI00783987 | 1 | 76.9 | 0.72 | 0.09 | 992 | ## | C3 Complement C3 precursor (Fragment) | n[145]SEETK[272]ENEGFTVTAEGK[272]   | 2 | 1144.5846 | 5.79  | 0.544 |
| 147 | IPI00783987 | 1 | 76.9 | 0.72 | 0.09 | 992 | ## | C3 Complement C3 precursor (Fragment) | n[145]SGIPIVTPYQIHFTK[272]          | 2 | 1038.5903 | 4.279 | 0.527 |
| 147 | IPI00783987 | 1 | 76.9 | 0.72 | 0.09 | 992 | ## | C3 Complement C3 precursor (Fragment) | n[145]SGSDEVQVGGQR                  | 2 | 717.3587  | 3.21  | 0.243 |
| 147 | IPI00783987 | 1 | 76.9 | 0.72 | 0.09 | 992 | ## | C3 Complement C3 precursor (Fragment) | n[145]SNLDEDIIEENIVSR               | 2 | 981.0008  | 6.356 | 0.5   |
| 147 | IPI00783987 | 1 | 76.9 | 0.72 | 0.09 | 992 | ## | C3 Complement C3 precursor (Fragment) | n[145]SSLSVPYVIVPLK[272]            | 2 | 845.5233  | 3.383 | 0.419 |
| 147 | IPI00783987 | 1 | 76.9 | 0.72 | 0.09 | 992 | ## | C3 Complement C3 precursor (Fragment) | n[145]STVGNSNYYLHLSVLR              | 2 | 959.5168  | 5.668 | 0.519 |
| 147 | IPI00783987 | 1 | 76.9 | 0.72 | 0.09 | 992 | ## | C3 Complement C3 precursor (Fragment) | n[145]SYTVAIAGYALAQM[147]GR         | 2 | 916.4783  | 5.168 | 0.524 |
| 147 | IPI00783987 | 1 | 76.9 | 0.72 | 0.09 | 992 | ## | C3 Complement C3 precursor (Fragment) | n[145]TVMVNIEPEGIPVK[272]           | 2 | 964.5419  | 4.124 | 0.403 |
| 147 | IPI00783987 | 1 | 76.9 | 0.72 | 0.09 | 992 | ## | C3 Complement C3 precursor (Fragment) | n[145]VAYYTLIGASGQR                 | 2 | 771.9235  | 4.727 | 0.485 |
| 147 | IPI00783987 | 1 | 76.9 | 0.72 | 0.09 | 992 | ## | C3 Complement C3 precursor (Fragment) | n[145]VELLHNPFCSLATTK[272]          | 2 | 1039.5545 | 5.263 | 0.522 |
| 147 | IPI00783987 | 1 | 76.9 | 0.72 | 0.09 | 992 | ## | C3 Complement C3 precursor (Fragment) | n[145]VHQYFNVELIQPGAOK[272]         | 2 | 1065.6012 | 5.634 | 0.547 |
| 147 | IPI00783987 | 1 | 76.9 | 0.72 | 0.09 | 992 | ## | C3 Complement C3 precursor (Fragment) | n[145]VPVAVQGEDTVQSLTQGDGVAK[272]   | 2 | 1243.6707 | 6.157 | 0.621 |
| 147 | IPI00783987 | 1 | 76.9 | 0.72 | 0.09 | 992 | ## | C3 Complement C3 precursor (Fragment) | n[145]VQLSNDFDEYIMAIETIK[272]       | 2 | 1273.1586 | 6.908 | 0.485 |
| 147 | IPI00783987 | 1 | 76.9 | 0.72 | 0.09 | 992 | ## | C3 Complement C3 precursor (Fragment) | n[145]VQLSNDFDEYIM[147]AIEQTIK[272] | 2 | 1281.156  | 5.951 | 0.551 |
| 147 | IPI00783987 | 1 | 76.9 | 0.72 | 0.09 | 992 | ## | C3 Complement C3 precursor (Fragment) | n[145]VSHSEDDCLAFK[272]             | 2 | 842.8993  | 4.652 | 0.584 |
| 147 | IPI00783987 | 1 | 76.9 | 0.72 | 0.09 | 992 | ## | C3 Complement C3 precursor (Fragment) | n[145]VYAYYNLEESCTR                 | 2 | 900.9063  | 3.743 | 0.522 |
| 147 | IPI00783987 | 1 | 76.9 | 0.72 | 0.09 | 992 | ## | C3 Complement C3 precursor (Fragment) | n[145]YYGGGYGSTQATF                 | 2 | 758.3473  | 3.458 | 0.487 |
| 147 | IPI00783987 | 1 | 76.9 | 0.72 | 0.09 | 992 | ## | C3 Complement C3 precursor (Fragment) | n[145]YYTYLIMNK[272]                | 2 | 748.9067  | 4.03  | 0.356 |
| 147 | IPI00783987 | 1 | 76.9 | 0.72 | 0.09 | 992 | ## | C3 Complement C3 precursor (Fragment) | AAVYHHFISDGVK                       | 3 | 627.3479  | 4.471 | 0.475 |
| 147 | IPI00783987 | 1 | 76.9 | 0.72 | 0.09 | 992 | ## | C3 Complement C3 precursor (Fragment) | AYYNSPQQVFSTFEVK                    | 3 | 816.069   | 3.965 | 0.416 |
| 147 | IPI00783987 | 1 | 76.9 | 0.72 | 0.09 | 992 | ## | C3 Complement C3 precursor (Fragment) | EGVQKEDIPPADLSDQVPDTESETR           | 3 | 1012.4983 | 5.866 | 0.515 |
| 147 | IPI00783987 | 1 | 76.9 | 0.72 | 0.09 | 992 | ## | C3 Complement C3 precursor (Fragment) | GQGTLVVTM[147]YHAK                  | 3 | 596.654   | 4.61  | 0.476 |
| 147 | IPI00783987 | 1 | 76.9 | 0.72 | 0.09 | 992 | ## | C3 Complement C3 precursor (Fragment) | GVFVLNKK                            | 3 | 442.287   | 2.198 | 0.315 |
| 147 | IPI00783987 | 1 | 76.9 | 0.72 | 0.09 | 992 | ## | C3 Complement C3 precursor (Fragment) | KGYTQQLAFR                          | 3 | 497.9526  | 5.033 | 0.445 |
| 147 | IPI00783987 | 1 | 76.9 | 0.72 | 0.09 | 992 | ## | C3 Complement C3 precursor (Fragment) | KQELSEAEQATR                        | 3 | 557.3005  | 2.949 | 0.265 |
| 147 | IPI00783987 | 1 | 76.9 | 0.72 | 0.09 | 992 | ## | C3 Complement C3 precursor (Fragment) | KVLLDGVQNP                          | 3 | 506.9754  | 3.503 | 0.351 |
| 147 | IPI00783987 | 1 | 76.9 | 0.72 | 0.09 | 992 | ## | C3 Complement C3 precursor (Fragment) | LESEETMVALEAHDAGDVPVTVVHDFPGK       | 3 | 1177.5873 | 8.351 | 0.625 |
| 147 | IPI00783987 | 1 | 76.9 | 0.72 | 0.09 | 992 | ## | C3 Complement C3 precursor (Fragment) | LESEETM[147]VLEAHDAGDVPVTVVHDFPGK   | 3 | 1182.9189 | 7.751 | 0.658 |
| 147 | IPI00783987 | 1 | 76.9 | 0.72 | 0.09 | 992 | ## | C3 Complement C3 precursor (Fragment) | IHWESASLLR                          | 3 | 451.2542  | 3.596 | 0.371 |
| 147 | IPI00783987 | 1 | 76.9 | 0.72 | 0.09 | 992 | ## | C3 Complement C3 precursor (Fragment) | QKPDGVFQEDAPVIHQEMIGGLR             | 3 | 948.8324  | 6.463 | 0.465 |
| 147 | IPI00783987 | 1 | 76.9 | 0.72 | 0.09 | 992 | ## | C3 Complement C3 precursor (Fragment) | QKPDGVFQEDAPVIHQEM[147]IGGLR        | 3 | 954.164   | 4.165 | 0.476 |
| 147 | IPI00783987 | 1 | 76.9 | 0.72 | 0.09 | 992 | ## | C3 Complement C3 precursor (Fragment) | SEETKENEGFTVTAEGK                   | 3 | 759.385   | 2.32  | 0.054 |
| 147 | IPI00783987 | 1 | 76.9 | 0.72 | 0.09 | 992 | ## | C3 Complement C3 precursor (Fragment) | SGIPIVTPYQIHFTK                     | 3 | 690.0579  | 2.891 | 0.147 |
| 147 | IPI00783987 | 1 | 76.9 | 0.72 | 0.09 | 992 | ## | C3 Complement C3 precursor (Fragment) | SGQSEDRQPVPQQMTLK                   | 3 | 756.0585  | 4.256 | 0.373 |
| 147 | IPI00783987 | 1 | 76.9 | 0.72 | 0.09 | 992 | ## | C3 Complement C3 precursor (Fragment) | SGQSEDRQPVPQQM[147]TLK              | 3 | 761.3901  | 3.876 | 0.437 |

|     |             |   |      |      |      |     |    |                                       |                                             |   |           |       |       |
|-----|-------------|---|------|------|------|-----|----|---------------------------------------|---------------------------------------------|---|-----------|-------|-------|
| 147 | IPI00783987 | 1 | 76.9 | 0.72 | 0.09 | 992 | ## | C3 Complement C3 precursor (Fragment) | SSLSVPYVIVPLKTGLQEVEVK                      | 3 | 935.8878  | 3.211 | 0.513 |
| 147 | IPI00783987 | 1 | 76.9 | 0.72 | 0.09 | 992 | ## | C3 Complement C3 precursor (Fragment) | VELLHNPAFCSLATTK                            | 3 | 690.7007  | 2.892 | 0.232 |
| 147 | IPI00783987 | 1 | 76.9 | 0.72 | 0.09 | 992 | ## | C3 Complement C3 precursor (Fragment) | VPVAVQGEDTVQSLTQGDGVAK                      | 3 | 826.7781  | 5.18  | 0.516 |
| 147 | IPI00783987 | 1 | 76.9 | 0.72 | 0.09 | 992 | ## | C3 Complement C3 precursor (Fragment) | VQLSNDFDEYIMAIEQTIK                         | 3 | 846.4367  | 4.054 | 0.423 |
| 147 | IPI00783987 | 1 | 76.9 | 0.72 | 0.09 | 992 | ## | C3 Complement C3 precursor (Fragment) | VQLSNDFDEYIM[147]AIEQTIK                    | 3 | 851.7684  | 4.873 | 0.464 |
| 147 | IPI00783987 | 1 | 76.9 | 0.72 | 0.09 | 992 | ## | C3 Complement C3 precursor (Fragment) | VSHSEDDCLAFK                                | 3 | 559.5972  | 2.177 | 0.215 |
| 147 | IPI00783987 | 1 | 76.9 | 0.72 | 0.09 | 992 | ## | C3 Complement C3 precursor (Fragment) | YFKPGM[147]PFDLM[147]VFTNPDGSPAYR           | 3 | 1021.1699 | 5.48  | 0.596 |
| 147 | IPI00783987 | 1 | 76.9 | 0.72 | 0.09 | 992 | ## | C3 Complement C3 precursor (Fragment) | n[145]AAVYHHFISDGVV                         | 3 | 539.2869  | 3.115 | 0.265 |
| 147 | IPI00783987 | 1 | 76.9 | 0.72 | 0.09 | 992 | ## | C3 Complement C3 precursor (Fragment) | n[145]AAVYHHFISDGVV[272]                    | 3 | 630.0193  | 5.173 | 0.421 |
| 147 | IPI00783987 | 1 | 76.9 | 0.72 | 0.09 | 992 | ## | C3 Complement C3 precursor (Fragment) | n[145]AQGDVPVTVVHDFPGK[272]                 | 3 | 685.7086  | 5.518 | 0.531 |
| 147 | IPI00783987 | 1 | 76.9 | 0.72 | 0.09 | 992 | ## | C3 Complement C3 precursor (Fragment) | n[145]AYYENSPQQVSTEFEVK[272]                | 3 | 818.7404  | 3.847 | 0.462 |
| 147 | IPI00783987 | 1 | 76.9 | 0.72 | 0.09 | 992 | ## | C3 Complement C3 precursor (Fragment) | n[145]DAPDHQELNLDVSLQLPSR                   | 3 | 764.3965  | 5.583 | 0.478 |
| 147 | IPI00783987 | 1 | 76.9 | 0.72 | 0.09 | 992 | ## | C3 Complement C3 precursor (Fragment) | n[145]EGVQK[272]EDIPADLSDQVPDTESETR         | 3 | 1015.1697 | 6.435 | 0.463 |
| 147 | IPI00783987 | 1 | 76.9 | 0.72 | 0.09 | 992 | ## | C3 Complement C3 precursor (Fragment) | n[145]FISLGEACK[272]K[272]                  | 3 | 525.2984  | 3.721 | 0.41  |
| 147 | IPI00783987 | 1 | 76.9 | 0.72 | 0.09 | 992 | ## | C3 Complement C3 precursor (Fragment) | n[145]GQQTLVSTVM[147]YHAK[272]              | 3 | 599.3254  | 4.515 | 0.371 |
| 147 | IPI00783987 | 1 | 76.9 | 0.72 | 0.09 | 992 | ## | C3 Complement C3 precursor (Fragment) | n[145]LESEETMVEAHDAQGDVPVTVVHDFPGK[272]     | 3 | 1180.2587 | 7.564 | 0.512 |
| 147 | IPI00783987 | 1 | 76.9 | 0.72 | 0.09 | 992 | ## | C3 Complement C3 precursor (Fragment) | n[145]LESEETM[147]VLEAHDAQGDVPVTVVHDFPGK    | 3 | 1185.5903 | 7.226 | 0.557 |
| 147 | IPI00783987 | 1 | 76.9 | 0.72 | 0.09 | 992 | ## | C3 Complement C3 precursor (Fragment) | n[145]IHWESASLLR                            | 3 | 452.5899  | 2.955 | 0.259 |
| 147 | IPI00783987 | 1 | 76.9 | 0.72 | 0.09 | 992 | ## | C3 Complement C3 precursor (Fragment) | n[145]ILLQGPVAQM[147]TEDAVDAER              | 3 | 773.0657  | 2.77  | 0.252 |
| 147 | IPI00783987 | 1 | 76.9 | 0.72 | 0.09 | 992 | ## | C3 Complement C3 precursor (Fragment) | n[145]LSINTHPSQK[272]PLSITVR                | 3 | 727.0982  | 4.644 | 0.445 |
| 147 | IPI00783987 | 1 | 76.9 | 0.72 | 0.09 | 992 | ## | C3 Complement C3 precursor (Fragment) | n[145]QK[272]PDGVFQEDAPVIHQEMIGGLR          | 3 | 951.5038  | 4.253 | 0.527 |
| 147 | IPI00783987 | 1 | 76.9 | 0.72 | 0.09 | 992 | ## | C3 Complement C3 precursor (Fragment) | n[145]QK[272]PDGVFQEDAPVIHQEM[147]IGGLR     | 3 | 956.8354  | 5.633 | 0.473 |
| 147 | IPI00783987 | 1 | 76.9 | 0.72 | 0.09 | 992 | ## | C3 Complement C3 precursor (Fragment) | n[145]RIPIEDGSSEVLSR                        | 3 | 590.9992  | 2.041 | 0.121 |
| 147 | IPI00783987 | 1 | 76.9 | 0.72 | 0.09 | 992 | ## | C3 Complement C3 precursor (Fragment) | n[145]SEETK[272]ENEGFTVTAEGK[272]           | 3 | 763.3921  | 5.936 | 0.567 |
| 147 | IPI00783987 | 1 | 76.9 | 0.72 | 0.09 | 992 | ## | C3 Complement C3 precursor (Fragment) | n[145]SGIPIVTSFYQIHFVK[272]                 | 3 | 692.7293  | 2.917 | 0.306 |
| 147 | IPI00783987 | 1 | 76.9 | 0.72 | 0.09 | 992 | ## | C3 Complement C3 precursor (Fragment) | n[145]SQGSEDRQVPVGGQMTLK[272]               | 3 | 758.7299  | 4.298 | 0.372 |
| 147 | IPI00783987 | 1 | 76.9 | 0.72 | 0.09 | 992 | ## | C3 Complement C3 precursor (Fragment) | n[145]SQGSEDRQVPVGGQM[147]TLK[272]          | 3 | 764.0615  | 2.456 | 0.098 |
| 147 | IPI00783987 | 1 | 76.9 | 0.72 | 0.09 | 992 | ## | C3 Complement C3 precursor (Fragment) | n[145]SSLSVPYVIVPLK[272]TGLQEVEVK[272]      | 3 | 939.8949  | 4.716 | 0.485 |
| 147 | IPI00783987 | 1 | 76.9 | 0.72 | 0.09 | 992 | ## | C3 Complement C3 precursor (Fragment) | n[145]STVGNSSNNYLHLSVLR                     | 3 | 640.0136  | 4.213 | 0.442 |
| 147 | IPI00783987 | 1 | 76.9 | 0.72 | 0.09 | 992 | ## | C3 Complement C3 precursor (Fragment) | n[145]SYTVAIAGYALAQM[147]GR                 | 3 | 611.3213  | 4.546 | 0.492 |
| 147 | IPI00783987 | 1 | 76.9 | 0.72 | 0.09 | 992 | ## | C3 Complement C3 precursor (Fragment) | n[145]TELRPGETLNVNFFLLR                     | 3 | 672.7168  | 3.972 | 0.382 |
| 147 | IPI00783987 | 1 | 76.9 | 0.72 | 0.09 | 992 | ## | C3 Complement C3 precursor (Fragment) | n[145]VELLHNPAFCSLATTK[272]                 | 3 | 693.3721  | 4.542 | 0.387 |
| 147 | IPI00783987 | 1 | 76.9 | 0.72 | 0.09 | 992 | ## | C3 Complement C3 precursor (Fragment) | n[145]VHQYFNVLELIQPGAVK[272]                | 3 | 710.7365  | 3.883 | 0.204 |
| 147 | IPI00783987 | 1 | 76.9 | 0.72 | 0.09 | 992 | ## | C3 Complement C3 precursor (Fragment) | n[145]VPVAVQGEDTVQSLTQGDGVAK[272]           | 3 | 829.4495  | 4.34  | 0.381 |
| 147 | IPI00783987 | 1 | 76.9 | 0.72 | 0.09 | 992 | ## | C3 Complement C3 precursor (Fragment) | n[145]VQLSNDFDEYIMAIEQTIK[272]              | 3 | 849.1081  | 4.034 | 0.391 |
| 147 | IPI00783987 | 1 | 76.9 | 0.72 | 0.09 | 992 | ## | C3 Complement C3 precursor (Fragment) | n[145]VQLSNDFDEYIM[147]AIEQTIK[272]         | 3 | 854.4398  | 2.569 | 0.339 |
| 147 | IPI00783987 | 1 | 76.9 | 0.72 | 0.09 | 992 | ## | C3 Complement C3 precursor (Fragment) | n[145]VSHSEDDCLAFK[272]                     | 3 | 562.2686  | 4.225 | 0.468 |
| 147 | IPI00783987 | 1 | 76.9 | 0.72 | 0.09 | 992 | ## | C3 Complement C3 precursor (Fragment) | n[145]VTIK[272]PAPETEK[272]                 | 3 | 549.0014  | 2.089 | 0.184 |
| 147 | IPI00783987 | 1 | 76.9 | 0.72 | 0.09 | 992 | ## | C3 Complement C3 precursor (Fragment) | n[145]VVLVAVDK[272]GVFVNLNK[272]            | 3 | 678.1014  | 3.558 | 0.562 |
| 147 | IPI00783987 | 1 | 76.9 | 0.72 | 0.09 | 992 | ## | C3 Complement C3 precursor (Fragment) | n[145]YFK[272]PGM[147]PFDLM[147]VFTNPDGSPAY | 3 | 1023.8413 | 5.582 | 0.569 |
| 147 | IPI00783987 | 1 | 76.9 | 0.72 | 0.09 | 992 | ## | C3 Complement C3 precursor (Fragment) | QKPDGVFQEDAPVIHQEM[147]IGGLR                | 4 | 715.8748  | 4.565 | 0.456 |
| 147 | IPI00783987 | 1 | 76.9 | 0.72 | 0.09 | 992 | ## | C3 Complement C3 precursor (Fragment) | n[145]LESEETMVEAHDAQGDVPVTVVHDFPGK[272]     | 4 | 885.4458  | 5.766 | 0.601 |
| 147 | IPI00783987 | 1 | 76.9 | 0.72 | 0.09 | 992 | ## | C3 Complement C3 precursor (Fragment) | n[145]LESEETM[147]VLEAHDAQGDVPVTVVHDFPGK    | 4 | 889.4446  | 5.131 | 0.579 |
| 147 | IPI00783987 | 1 | 76.9 | 0.72 | 0.09 | 992 | ## | C3 Complement C3 precursor (Fragment) | n[145]LESEETMVEAHDAQGDVPVTVVHDFPGK[272]     | 5 | 762.9975  | 4.019 | 0.414 |
| 147 | IPI00783987 | 1 | 76.9 | 0.72 | 0.09 | 992 | ## | C3 Complement C3 precursor (Fragment) | FYYIYNEK                                    | 2 | 710.369   | 2.997 | 0.376 |
| 147 | IPI00783987 | 1 | 76.9 | 0.72 | 0.09 | 992 | ## | C3 Complement C3 precursor (Fragment) | YYTYLIM[147]NK                              | 2 | 752.8971  | 4.08  | 0.332 |
| 147 | IPI00783987 | 1 | 76.9 | 0.72 | 0.09 | 992 | ## | C3 Complement C3 precursor (Fragment) | AAVYHHFISDGVV                               | 3 | 537.9512  | 3.208 | 0.351 |
| 147 | IPI00783987 | 1 | 76.9 | 0.72 | 0.09 | 992 | ## | C3 Complement C3 precursor (Fragment) | AKDQLTCNK                                   | 3 | 496.2672  | 2.515 | 0.197 |



|     |             |   |      |      |      |     |    |                                       |                                        |   |           |       |       |
|-----|-------------|---|------|------|------|-----|----|---------------------------------------|----------------------------------------|---|-----------|-------|-------|
| 147 | IPI00783987 | 1 | 76.9 | 0.72 | 0.09 | 992 | ## | C3 Complement C3 precursor (Fragment) | FISLGEACKK                             | 3 | 521.2913  | 3.174 | 0.336 |
| 147 | IPI00783987 | 1 | 76.9 | 0.72 | 0.09 | 992 | ## | C3 Complement C3 precursor (Fragment) | LSINTHPSQKPLSITVR                      | 3 | 724.4268  | 3.942 | 0.376 |
| 147 | IPI00783987 | 1 | 76.9 | 0.72 | 0.09 | 992 | ## | C3 Complement C3 precursor (Fragment) | VHQYFNVELIQPGAVK                       | 3 | 708.0651  | 4.032 | 0.125 |
| 147 | IPI00783987 | 1 | 76.9 | 0.72 | 0.09 | 992 | ## | C3 Complement C3 precursor (Fragment) | VTIKPAPETEK                            | 3 | 544.9943  | 2.023 | 0.179 |
| 147 | IPI00783987 | 1 | 76.9 | 0.72 | 0.09 | 992 | ## | C3 Complement C3 precursor (Fragment) | n[145]AGDFLEANYM[147]NLQR              | 3 | 601.2935  | 4.267 | 0.342 |
| 147 | IPI00783987 | 1 | 76.9 | 0.72 | 0.09 | 992 | ## | C3 Complement C3 precursor (Fragment) | n[145]AK[272]DQLTCNK[272]              | 3 | 500.2743  | 2.552 | 0.065 |
| 147 | IPI00783987 | 1 | 76.9 | 0.72 | 0.09 | 992 | ## | C3 Complement C3 precursor (Fragment) | n[145]DSITTWEILAVSM[147]SDK[272]K[272] | 3 | 791.4296  | 3.659 | 0.359 |
| 147 | IPI00783987 | 1 | 76.9 | 0.72 | 0.09 | 992 | ## | C3 Complement C3 precursor (Fragment) | n[145]DTWVEHWPEEDECQDEENQK[272]        | 3 | 960.7371  | 4.143 | 0.331 |
| 147 | IPI00783987 | 1 | 76.9 | 0.72 | 0.09 | 992 | ## | C3 Complement C3 precursor (Fragment) | n[145]DYAGVFS DAGLTFTSSSGQQT AQR       | 3 | 880.0882  | 2.982 | 0.316 |
| 147 | IPI00783987 | 1 | 76.9 | 0.72 | 0.09 | 992 | ## | C3 Complement C3 precursor (Fragment) | n[145]FYHPEK[272]EDGK[272]LNK[272]     | 3 | 727.7432  | 3.346 | 0.157 |
| 147 | IPI00783987 | 1 | 76.9 | 0.72 | 0.09 | 992 | ## | C3 Complement C3 precursor (Fragment) | n[145]GVFVLNK[272]K[272]               | 3 | 446.2941  | 2.933 | 0.348 |
| 147 | IPI00783987 | 1 | 76.9 | 0.72 | 0.09 | 992 | ## | C3 Complement C3 precursor (Fragment) | n[145]HQQTVTIPPK[272]                  | 3 | 479.6203  | 3.102 | 0.362 |
| 147 | IPI00783987 | 1 | 76.9 | 0.72 | 0.09 | 992 | ## | C3 Complement C3 precursor (Fragment) | n[145]LK[272]GPLLNK[272]               | 3 | 438.966   | 3.308 | 0.267 |
| 147 | IPI00783987 | 1 | 76.9 | 0.72 | 0.09 | 992 | ## | C3 Complement C3 precursor (Fragment) | n[145]LVAYYTLIGASGQR                   | 3 | 552.6461  | 3.167 | 0.362 |
| 147 | IPI00783987 | 1 | 76.9 | 0.72 | 0.09 | 992 | ## | C3 Complement C3 precursor (Fragment) | n[145]SLYVSATVILHSGSDM[147]VQAER       | 3 | 808.4167  | 4.337 | 0.431 |
| 147 | IPI00783987 | 1 | 76.9 | 0.72 | 0.09 | 992 | ## | C3 Complement C3 precursor (Fragment) | n[145]SNLDEEDIAEENIVSR                 | 3 | 654.3363  | 2.958 | 0.308 |
| 147 | IPI00783987 | 1 | 76.9 | 0.72 | 0.09 | 992 | ## | C3 Complement C3 precursor (Fragment) | LESEETMVALEAHDAQGDVPTVTVHDFPGKK        | 4 | 950.4898  | 3.991 | 0.315 |
| 147 | IPI00783987 | 1 | 76.9 | 0.72 | 0.09 | 992 | ## | C3 Complement C3 precursor (Fragment) | YFKPGM[147]PFDLM[147]VFTNPDGSPAYR      | 4 | 766.1292  | 3.341 | 0.259 |
| 147 | IPI00783987 | 1 | 76.9 | 0.72 | 0.09 | 992 | ## | C3 Complement C3 precursor (Fragment) | n[145]AAVYHHFISDGVRK[272]              | 4 | 472.7663  | 3.08  | 0.337 |
| 147 | IPI00783987 | 1 | 76.9 | 0.72 | 0.09 | 992 | ## | C3 Complement C3 precursor (Fragment) | n[145]RQGALELIK[272]K[272]             | 4 | 397.7622  | 2.559 | 0.248 |
| 147 | IPI00783987 | 1 | 76.9 | 0.72 | 0.09 | 992 | ## | C3 Complement C3 precursor (Fragment) | n[145]VHQYFNVELIQPGAVK[272]            | 4 | 533.3042  | 3.158 | 0.32  |
| 147 | IPI00783987 | 1 | 76.9 | 0.72 | 0.09 | 992 | ## | C3 Complement C3 precursor (Fragment) | LESEETMVALEAHDAQGDVPTVTVHDFPGKK        | 5 | 760.5933  | 2.948 | 0.319 |
| 147 | IPI00783987 | 1 | 76.9 | 0.72 | 0.09 | 992 | ## | C3 Complement C3 precursor (Fragment) | AAVYHHFISDGVR                          | 2 | 806.4232  | 3.496 | 0.401 |
| 147 | IPI00783987 | 1 | 76.9 | 0.72 | 0.09 | 992 | ## | C3 Complement C3 precursor (Fragment) | KGYTQQLAFR                             | 2 | 746.4252  | 1.377 | 0.107 |
| 147 | IPI00783987 | 1 | 76.9 | 0.72 | 0.09 | 992 | ## | C3 Complement C3 precursor (Fragment) | VTIKPAPETEK                            | 2 | 816.9879  | 3.117 | 0.31  |
| 147 | IPI00783987 | 1 | 76.9 | 0.72 | 0.09 | 992 | ## | C3 Complement C3 precursor (Fragment) | YYTYLIMNK                              | 2 | 744.8996  | 3.672 | 0.303 |
| 147 | IPI00783987 | 1 | 76.9 | 0.72 | 0.09 | 992 | ## | C3 Complement C3 precursor (Fragment) | n[145]ADIGCTPGSGK[272]                 | 2 | 670.3331  | 3.808 | 0.377 |
| 147 | IPI00783987 | 1 | 76.9 | 0.72 | 0.09 | 992 | ## | C3 Complement C3 precursor (Fragment) | n[145]FISLGEACK[272]                   | 2 | 651.3455  | 2.642 | 0.303 |
| 147 | IPI00783987 | 1 | 76.9 | 0.72 | 0.09 | 992 | ## | C3 Complement C3 precursor (Fragment) | n[145]FYIYNEK[272]                     | 2 | 714.3761  | 2.818 | 0.297 |
| 147 | IPI00783987 | 1 | 76.9 | 0.72 | 0.09 | 992 | ## | C3 Complement C3 precursor (Fragment) | n[145]GVFVLNK[272]                     | 2 | 532.839   | 2.995 | 0.338 |
| 147 | IPI00783987 | 1 | 76.9 | 0.72 | 0.09 | 992 | ## | C3 Complement C3 precursor (Fragment) | n[145]GVFVLNK[272]K[272]               | 2 | 668.9375  | 2.816 | 0.413 |
| 147 | IPI00783987 | 1 | 76.9 | 0.72 | 0.09 | 992 | ## | C3 Complement C3 precursor (Fragment) | n[145]GYTQQLAFR                        | 2 | 614.3338  | 2.789 | 0.366 |
| 147 | IPI00783987 | 1 | 76.9 | 0.72 | 0.09 | 992 | ## | C3 Complement C3 precursor (Fragment) | n[145]NTLIYLDK[272]                    | 2 | 690.9207  | 3.447 | 0.248 |
| 147 | IPI00783987 | 1 | 76.9 | 0.72 | 0.09 | 992 | ## | C3 Complement C3 precursor (Fragment) | n[145]NTMILEICTR                       | 2 | 692.3494  | 2.963 | 0.352 |
| 147 | IPI00783987 | 1 | 76.9 | 0.72 | 0.09 | 992 | ## | C3 Complement C3 precursor (Fragment) | n[145]NTM[147]ILEICTR                  | 2 | 700.3468  | 2.329 | 0.215 |
| 147 | IPI00783987 | 1 | 76.9 | 0.72 | 0.09 | 992 | ## | C3 Complement C3 precursor (Fragment) | n[145]QPSSAFAAFVK[272]                 | 2 | 720.9081  | 3.656 | 0.429 |
| 147 | IPI00783987 | 1 | 76.9 | 0.72 | 0.09 | 992 | ## | C3 Complement C3 precursor (Fragment) | n[145]RIPIEDGSGEVLSR                   | 2 | 885.9952  | 4.715 | 0.354 |
| 147 | IPI00783987 | 1 | 76.9 | 0.72 | 0.09 | 992 | ## | C3 Complement C3 precursor (Fragment) | n[145]TELRPGETLNVNFLLR                 | 2 | 1008.5716 | 4.098 | 0.333 |
| 147 | IPI00783987 | 1 | 76.9 | 0.72 | 0.09 | 992 | ## | C3 Complement C3 precursor (Fragment) | n[145]TVM[147]VNINPEGIPVK[272]         | 2 | 972.5394  | 3.959 | 0.418 |
| 147 | IPI00783987 | 1 | 76.9 | 0.72 | 0.09 | 992 | ## | C3 Complement C3 precursor (Fragment) | n[145]VTIK[272]PAPETEK[272]            | 2 | 822.9985  | 2.521 | 0.285 |
| 147 | IPI00783987 | 1 | 76.9 | 0.72 | 0.09 | 992 | ## | C3 Complement C3 precursor (Fragment) | n[145]YYTYLIM[147]NK[272]              | 2 | 756.9042  | 3.97  | 0.352 |
| 147 | IPI00783987 | 1 | 76.9 | 0.72 | 0.09 | 992 | ## | C3 Complement C3 precursor (Fragment) | VVLVAVDKGVFVLNK                        | 3 | 674.0943  | 2.88  | 0.381 |
| 147 | IPI00783987 | 1 | 76.9 | 0.72 | 0.09 | 992 | ## | C3 Complement C3 precursor (Fragment) | n[145]AK[272]DQLTCNK[272]FDLK[272]     | 3 | 716.0664  | 2.89  | 0.32  |
| 147 | IPI00783987 | 1 | 76.9 | 0.72 | 0.09 | 992 | ## | C3 Complement C3 precursor (Fragment) | n[145]SEFPESWLWNVEDLK[272]EPPK[272]    | 3 | 921.4849  | 3.257 | 0.412 |
| 147 | IPI00783987 | 1 | 76.9 | 0.72 | 0.09 | 992 | ## | C3 Complement C3 precursor (Fragment) | n[145]TK[272]K[272]QELSEAEQATR         | 3 | 684.3868  | 3.678 | 0.309 |
| 147 | IPI00783987 | 1 | 76.9 | 0.72 | 0.09 | 992 | ## | C3 Complement C3 precursor (Fragment) | n[145]VYHHFISDGVR                      | 3 | 491.9288  | 2.334 | 0.25  |
| 147 | IPI00783987 | 1 | 76.9 | 0.72 | 0.09 | 992 | ## | C3 Complement C3 precursor (Fragment) | FISLGEACK                              | 2 | 647.3384  | 2.776 | 0.315 |
| 147 | IPI00783987 | 1 | 76.9 | 0.72 | 0.09 | 992 | ## | C3 Complement C3 precursor (Fragment) | GLEVITAR                               | 2 | 550.3271  | 2.776 | 0.391 |

|     |             |   |      |      |      |     |    |                                       |                                    |   |           |       |       |
|-----|-------------|---|------|------|------|-----|----|---------------------------------------|------------------------------------|---|-----------|-------|-------|
| 147 | IPI00783987 | 1 | 76.9 | 0.72 | 0.09 | 992 | ## | C3 Complement C3 precursor (Fragment) | GVFVLNKK                           | 2 | 662.9269  | 3.117 | 0.357 |
| 147 | IPI00783987 | 1 | 76.9 | 0.72 | 0.09 | 992 | ## | C3 Complement C3 precursor (Fragment) | KVLLDGVQNPR                        | 2 | 759.9594  | 3.2   | 0.352 |
| 147 | IPI00783987 | 1 | 76.9 | 0.72 | 0.09 | 992 | ## | C3 Complement C3 precursor (Fragment) | NTLIYLDK                           | 2 | 686.9136  | 3.033 | 0.244 |
| 147 | IPI00783987 | 1 | 76.9 | 0.72 | 0.09 | 992 | ## | C3 Complement C3 precursor (Fragment) | TGLQEVEVK                          | 2 | 641.8719  | 3.451 | 0.265 |
| 147 | IPI00783987 | 1 | 76.9 | 0.72 | 0.09 | 992 | ## | C3 Complement C3 precursor (Fragment) | VVLVAVDK                           | 2 | 561.8659  | 2.724 | 0.179 |
| 147 | IPI00783987 | 1 | 76.9 | 0.72 | 0.09 | 992 | ## | C3 Complement C3 precursor (Fragment) | n[145]ASHLGLAR                     | 2 | 484.7915  | 2.53  | 0.264 |
| 147 | IPI00783987 | 1 | 76.9 | 0.72 | 0.09 | 992 | ## | C3 Complement C3 precursor (Fragment) | n[145]GLEVTITAR                    | 2 | 552.3307  | 1.398 | 0.198 |
| 147 | IPI00783987 | 1 | 76.9 | 0.72 | 0.09 | 992 | ## | C3 Complement C3 precursor (Fragment) | n[145]HQQTVTIPPK[272]              | 2 | 718.9269  | 2.913 | 0.374 |
| 147 | IPI00783987 | 1 | 76.9 | 0.72 | 0.09 | 992 | ## | C3 Complement C3 precursor (Fragment) | n[145]TGLQEVEVK[272]               | 2 | 645.879   | 2.543 | 0.253 |
| 147 | IPI00783987 | 1 | 76.9 | 0.72 | 0.09 | 992 | ## | C3 Complement C3 precursor (Fragment) | n[145]VLLDGVQNPR                   | 2 | 627.868   | 3.047 | 0.154 |
| 147 | IPI00783987 | 1 | 76.9 | 0.72 | 0.09 | 992 | ## | C3 Complement C3 precursor (Fragment) | n[145]VVLVAVDK[272]                | 2 | 565.873   | 3.18  | 0.27  |
| 147 | IPI00783987 | 1 | 76.9 | 0.72 | 0.09 | 992 | ## | C3 Complement C3 precursor (Fragment) | KVEGTAFFVIFGIQDGEQR                | 3 | 758.7462  | 2.854 | 0.322 |
| 147 | IPI00783987 | 1 | 76.9 | 0.72 | 0.09 | 992 | ## | C3 Complement C3 precursor (Fragment) | n[145]JSLPESLK[272]R               | 3 | 444.2814  | 2.821 | 0.213 |
| 147 | IPI00783987 | 1 | 76.9 | 0.72 | 0.09 | 992 | ## | C3 Complement C3 precursor (Fragment) | n[145]TIYTPGSTVLYR                 | 3 | 505.616   | 2.364 | 0.301 |
| 147 | IPI00783987 | 1 | 76.9 | 0.72 | 0.09 | 992 | ## | C3 Complement C3 precursor (Fragment) | n[145]LSINTHPSQK[272]PLSITVR       | 4 | 545.5755  | 1.824 | 0.032 |
| 147 | IPI00783987 | 1 | 76.9 | 0.72 | 0.09 | 992 | ## | C3 Complement C3 precursor (Fragment) | n[145]TK[272]K[272]QELSEAEQATR     | 4 | 513.5419  | 3.989 | 0.247 |
| 147 | IPI00783987 | 1 | 76.9 | 0.72 | 0.09 | 992 | ## | C3 Complement C3 precursor (Fragment) | n[145]DFDFVPPVVR                   | 1 | 1334.7226 | 2.234 | 0.409 |
| 147 | IPI00783987 | 1 | 76.9 | 0.72 | 0.09 | 992 | ## | C3 Complement C3 precursor (Fragment) | ASHLGLAR                           | 2 | 482.788   | 2.922 | 0.306 |
| 147 | IPI00783987 | 1 | 76.9 | 0.72 | 0.09 | 992 | ## | C3 Complement C3 precursor (Fragment) | FISLGEACKK                         | 2 | 781.4333  | 3.398 | 0.224 |
| 147 | IPI00783987 | 1 | 76.9 | 0.72 | 0.09 | 992 | ## | C3 Complement C3 precursor (Fragment) | SGSDEVQVGQQR                       | 2 | 715.3552  | 2.962 | 0.207 |
| 147 | IPI00783987 | 1 | 76.9 | 0.72 | 0.09 | 992 | ## | C3 Complement C3 precursor (Fragment) | n[145]AGDFLEANYM[147]NLQR          | 2 | 901.4366  | 2.923 | 0.284 |
| 147 | IPI00783987 | 1 | 76.9 | 0.72 | 0.09 | 992 | ## | C3 Complement C3 precursor (Fragment) | n[145]AVLYNYR                      | 2 | 521.7938  | 2.78  | 0.255 |
| 147 | IPI00783987 | 1 | 76.9 | 0.72 | 0.09 | 992 | ## | C3 Complement C3 precursor (Fragment) | n[145]FISLGEACK[272]K[272]         | 2 | 787.444   | 3.788 | 0.287 |
| 147 | IPI00783987 | 1 | 76.9 | 0.72 | 0.09 | 992 | ## | C3 Complement C3 precursor (Fragment) | n[145]TIYTPGSTVLYR                 | 2 | 757.9204  | 2.458 | 0.048 |
| 147 | IPI00783987 | 1 | 76.9 | 0.72 | 0.09 | 992 | ## | C3 Complement C3 precursor (Fragment) | LKGPLLNK                           | 3 | 434.9589  | 3.126 | 0.243 |
| 147 | IPI00783987 | 1 | 76.9 | 0.72 | 0.09 | 992 | ## | C3 Complement C3 precursor (Fragment) | VPVTVTVHDFPGK                      | 3 | 559.3225  | 3.131 | 0.406 |
| 147 | IPI00783987 | 1 | 76.9 | 0.72 | 0.09 | 992 | ## | C3 Complement C3 precursor (Fragment) | DFDFVPPVVR                         | 1 | 1330.7155 | 1.95  | 0.397 |
| 147 | IPI00783987 | 1 | 76.9 | 0.72 | 0.09 | 992 | ## | C3 Complement C3 precursor (Fragment) | LVLSEK                             | 1 | 1055.646  | 2.581 | 0.215 |
| 147 | IPI00783987 | 1 | 76.9 | 0.72 | 0.09 | 992 | ## | C3 Complement C3 precursor (Fragment) | n[145]GYTQQLAFR                    | 1 | 1227.6603 | 2.579 | 0.294 |
| 147 | IPI00783987 | 1 | 76.9 | 0.72 | 0.09 | 992 | ## | C3 Complement C3 precursor (Fragment) | DQLTCNK                            | 2 | 574.2836  | 2.809 | 0.303 |
| 147 | IPI00783987 | 1 | 76.9 | 0.72 | 0.09 | 992 | ## | C3 Complement C3 precursor (Fragment) | GVFVLNK                            | 2 | 528.8319  | 2.981 | 0.247 |
| 147 | IPI00783987 | 1 | 76.9 | 0.72 | 0.09 | 992 | ## | C3 Complement C3 precursor (Fragment) | n[145]CCEDGMR                      | 2 | 525.1768  | 2.188 | 0.399 |
| 147 | IPI00783987 | 1 | 76.9 | 0.72 | 0.09 | 992 | ## | C3 Complement C3 precursor (Fragment) | n[145]FYIYNEK[272]                 | 3 | 476.5865  | 2.43  | 0.224 |
| 147 | IPI00783987 | 1 | 76.9 | 0.72 | 0.09 | 992 | ## | C3 Complement C3 precursor (Fragment) | n[145]AAVYHHFISDQVR                | 4 | 404.717   | 2.218 | 0.184 |
| 147 | IPI00783987 | 1 | 76.9 | 0.72 | 0.09 | 992 | ## | C3 Complement C3 precursor (Fragment) | AEDLVGK                            | 1 | 1011.5834 | 2.548 | 0.166 |
| 147 | IPI00783987 | 1 | 76.9 | 0.72 | 0.09 | 992 | ## | C3 Complement C3 precursor (Fragment) | AVLYNYR                            | 1 | 1038.5732 | 2.408 | 0.212 |
| 147 | IPI00783987 | 1 | 76.9 | 0.72 | 0.09 | 992 | ## | C3 Complement C3 precursor (Fragment) | n[145]GLEVTITAR                    | 1 | 1103.6541 | 2.44  | 0.314 |
| 147 | IPI00783987 | 1 | 76.9 | 0.72 | 0.09 | 992 | ## | C3 Complement C3 precursor (Fragment) | n[145]LVLSEK[272]                  | 1 | 1063.6602 | 2.45  | 0.21  |
| 147 | IPI00783987 | 1 | 76.9 | 0.72 | 0.09 | 992 | ## | C3 Complement C3 precursor (Fragment) | n[145]IPIEDGSGEVLSR                | 2 | 807.9446  | 2.622 | 0.286 |
| 147 | IPI00783987 | 1 | 76.9 | 0.72 | 0.09 | 992 | ## | C3 Complement C3 precursor (Fragment) | IPIEDGSGEVLSRK                     | 3 | 627.0264  | 3.063 | 0.214 |
| 147 | IPI00783987 | 1 | 76.9 | 0.72 | 0.09 | 992 | ## | C3 Complement C3 precursor (Fragment) | n[145]TM[147]QALPYSTVGNSSNYLHLSVLR | 4 | 685.3568  | 2.436 | 0.253 |
| 147 | IPI00783987 | 1 | 76.9 | 0.72 | 0.09 | 992 | ## | C3 Complement C3 precursor (Fragment) | GLEVTITAR                          | 1 | 1099.647  | 2.249 | 0.271 |
| 147 | IPI00783987 | 1 | 76.9 | 0.72 | 0.09 | 992 | ## | C3 Complement C3 precursor (Fragment) | n[145]AVLYNYR                      | 1 | 1042.5803 | 2.166 | 0.254 |
| 147 | IPI00783987 | 1 | 76.9 | 0.72 | 0.09 | 992 | ## | C3 Complement C3 precursor (Fragment) | n[145]SVQLTEK[272]                 | 1 | 1092.6504 | 2.282 | 0.185 |
| 147 | IPI00783987 | 1 | 76.9 | 0.72 | 0.09 | 992 | ## | C3 Complement C3 precursor (Fragment) | HQQTVTIPPK                         | 2 | 714.9198  | 1.681 | 0.343 |
| 147 | IPI00783987 | 1 | 76.9 | 0.72 | 0.09 | 992 | ## | C3 Complement C3 precursor (Fragment) | n[145]DFDFVPPVVR                   | 2 | 667.8649  | 2.619 | 0.238 |
| 147 | IPI00783987 | 1 | 76.9 | 0.72 | 0.09 | 992 | ## | C3 Complement C3 precursor (Fragment) | n[145]DQLTCNK[272]                 | 2 | 578.2907  | 2.601 | 0.245 |
| 147 | IPI00783987 | 1 | 76.9 | 0.72 | 0.09 | 992 | ## | C3 Complement C3 precursor (Fragment) | n[145]IHWESASLLR                   | 2 | 678.3813  | 2.683 | 0.272 |

|     |             |   |      |      |      |     |    |                                       |                                         |   |           |       |       |
|-----|-------------|---|------|------|------|-----|----|---------------------------------------|-----------------------------------------|---|-----------|-------|-------|
| 147 | IPI00783987 | 1 | 76.9 | 0.72 | 0.09 | 992 | ## | C3 Complement C3 precursor (Fragment) | n[145]QELSEAEQATR                       | 2 | 703.3556  | 3.029 | 0.313 |
| 147 | IPI00783987 | 1 | 76.9 | 0.72 | 0.09 | 992 | ## | C3 Complement C3 precursor (Fragment) | n[145]GEK[272]PNLSYIIGK[272]            | 3 | 584.3525  | 3.921 | 0.336 |
| 147 | IPI00783987 | 1 | 76.9 | 0.72 | 0.09 | 992 | ## | C3 Complement C3 precursor (Fragment) | n[145]AQGDVPVTVVHDFPGK[272]K[272]       | 4 | 582.5826  | 3.919 | 0.345 |
| 147 | IPI00783987 | 1 | 76.9 | 0.72 | 0.09 | 992 | ## | C3 Complement C3 precursor (Fragment) | TIYTPGSTVLYR                            | 1 | 1510.8265 | 1.55  | 0.358 |
| 147 | IPI00783987 | 1 | 76.9 | 0.72 | 0.09 | 992 | ## | C3 Complement C3 precursor (Fragment) | n[145]AEDLVGK[272]                      | 1 | 1019.5976 | 2.551 | 0.159 |
| 147 | IPI00783987 | 1 | 76.9 | 0.72 | 0.09 | 992 | ## | C3 Complement C3 precursor (Fragment) | SVQLTEK                                 | 2 | 542.8217  | 2.79  | 0.188 |
| 147 | IPI00783987 | 1 | 76.9 | 0.72 | 0.09 | 992 | ## | C3 Complement C3 precursor (Fragment) | n[145]AEDLVGK[272]                      | 2 | 510.3024  | 2.555 | 0.184 |
| 147 | IPI00783987 | 1 | 76.9 | 0.72 | 0.09 | 992 | ## | C3 Complement C3 precursor (Fragment) | AEDLVGK                                 | 2 | 506.2953  | 2.251 | 0.08  |
| 147 | IPI00783987 | 1 | 76.9 | 0.72 | 0.09 | 992 | ## | C3 Complement C3 precursor (Fragment) | n[145]SVQLTEK[272]                      | 2 | 546.8288  | 2.395 | 0.144 |
| 147 | IPI00783987 | 1 | 76.9 | 0.72 | 0.09 | 992 | ## | C3 Complement C3 precursor (Fragment) | n[145]AAVYHHF                           | 3 | 330.1756  | 2.925 | 0.324 |
| 147 | IPI00783987 | 1 | 76.9 | 0.72 | 0.09 | 992 | ## | C3 Complement C3 precursor (Fragment) | n[145]AVYHHFISDGVR                      | 3 | 515.6079  | 3.264 | 0.389 |
| 147 | IPI00783987 | 1 | 76.9 | 0.72 | 0.09 | 992 | ## | C3 Complement C3 precursor (Fragment) | n[145]IWDVVEK[272]                      | 2 | 588.847   | 2.621 | 0.14  |
| 147 | IPI00783987 | 1 | 76.9 | 0.72 | 0.09 | 992 | ## | C3 Complement C3 precursor (Fragment) | n[145]VVPEGIR                           | 2 | 457.283   | 2.376 | 0.193 |
| 147 | IPI00783987 | 1 | 76.9 | 0.72 | 0.09 | 992 | ## | C3 Complement C3 precursor (Fragment) | SVQLTEK                                 | 1 | 1084.6362 | 2.258 | 0.098 |
| 147 | IPI00783987 | 1 | 76.9 | 0.72 | 0.09 | 992 | ## | C3 Complement C3 precursor (Fragment) | IWDVVEK                                 | 2 | 584.8399  | 2.529 | 0.184 |
| 147 | IPI00783987 | 1 | 76.9 | 0.72 | 0.09 | 992 | ## | C3 Complement C3 precursor (Fragment) | VLLDGVQNP                               | 2 | 625.8644  | 2.488 | 0.157 |
| 147 | IPI00783987 | 1 | 76.9 | 0.72 | 0.09 | 992 | ## | C3 Complement C3 precursor (Fragment) | n[145]VPVTVTVHDFPGK[272]                | 3 | 561.9939  | 3.16  | 0.35  |
| 147 | IPI00783987 | 1 | 76.9 | 0.72 | 0.09 | 992 | ## | C3 Complement C3 precursor (Fragment) | SDDKVTLEER                              | 3 | 491.2632  | 1.537 | 0.064 |
| 147 | IPI00783987 | 1 | 76.9 | 0.72 | 0.09 | 992 | ## | C3 Complement C3 precursor (Fragment) | n[145]FYHPEK[272]EDGK[272]              | 3 | 561.3019  | 2.295 | 0.208 |
| 147 | IPI00783987 | 1 | 76.9 | 0.72 | 0.09 | 992 | ## | C3 Complement C3 precursor (Fragment) | n[145]IFTVNHK[272]                      | 3 | 382.9006  | 2.443 | 0.207 |
| 147 | IPI00783987 | 1 | 76.9 | 0.72 | 0.09 | 992 | ## | C3 Complement C3 precursor (Fragment) | n[145]NK[272]LTQSK[272]                 | 3 | 417.598   | 2.35  | 0.265 |
| 147 | IPI00783987 | 1 | 76.9 | 0.72 | 0.09 | 992 | ## | C3 Complement C3 precursor (Fragment) | IHWESASLLR                              | 2 | 676.3777  | 2.923 | 0.193 |
| 147 | IPI00783987 | 1 | 76.9 | 0.72 | 0.09 | 992 | ## | C3 Complement C3 precursor (Fragment) | TKKQELSEAEQATR                          | 3 | 680.3797  | 2.875 | 0.242 |
| 147 | IPI00783987 | 1 | 76.9 | 0.72 | 0.09 | 992 | ## | C3 Complement C3 precursor (Fragment) | n[145]SSLSVPYVIVPLK[272]                | 3 | 564.018   | 3.094 | 0.144 |
| 147 | IPI00783987 | 1 | 76.9 | 0.72 | 0.09 | 992 | ## | C3 Complement C3 precursor (Fragment) | n[145]LESEETM[147]VLEAHDQGDVPVTVVHDFPGK | 5 | 711.7571  | 2.569 | 0.12  |
| 147 | IPI00783987 | 1 | 76.9 | 0.72 | 0.09 | 992 | ## | C3 Complement C3 precursor (Fragment) | EKPNSYIIGK                              | 3 | 561.3382  | 3.108 | 0.334 |
| 147 | IPI00783987 | 1 | 76.9 | 0.72 | 0.09 | 992 | ## | C3 Complement C3 precursor (Fragment) | FYHPEKEDGK                              | 3 | 557.2948  | 2.364 | 0.196 |
| 147 | IPI00783987 | 1 | 76.9 | 0.72 | 0.09 | 992 | ## | C3 Complement C3 precursor (Fragment) | n[145]SDDK[272]VTLEER                   | 1 | 1479.7894 | 2.383 | 0.226 |
| 147 | IPI00783987 | 1 | 76.9 | 0.72 | 0.09 | 992 | ## | C3 Complement C3 precursor (Fragment) | n[145]VFLDCCNYITELR                     | 2 | 912.9173  | 2.821 | 0.266 |
| 147 | IPI00783987 | 1 | 76.9 | 0.72 | 0.09 | 992 | ## | C3 Complement C3 precursor (Fragment) | SDDKVTLEER                              | 2 | 736.3912  | 3.225 | 0.297 |
| 147 | IPI00783987 | 1 | 76.9 | 0.72 | 0.09 | 992 | ## | C3 Complement C3 precursor (Fragment) | n[145]VPVTVTVHDFPGK[272]K[272]          | 4 | 489.7966  | 1.969 | 0.08  |
| 147 | IPI00783987 | 1 | 76.9 | 0.72 | 0.09 | 992 | ## | C3 Complement C3 precursor (Fragment) | n[145]VVPEGIR                           | 1 | 913.5588  | 1.771 | 0.215 |
| 147 | IPI00783987 | 1 | 76.9 | 0.72 | 0.09 | 992 | ## | C3 Complement C3 precursor (Fragment) | AQGDVPVTVTVHDFPGK                       | 3 | 683.0372  | 3.014 | 0.356 |
| 147 | IPI00783987 | 1 | 76.9 | 0.72 | 0.09 | 992 | ## | C3 Complement C3 precursor (Fragment) | AKDQLTCNK                               | 2 | 743.8971  | 3.237 | 0.321 |
| 147 | IPI00783987 | 1 | 76.9 | 0.72 | 0.09 | 992 | ## | C3 Complement C3 precursor (Fragment) | n[145]AK[272]DQLTCNK[272]               | 2 | 749.9078  | 3.337 | 0.238 |
| 147 | IPI00783987 | 1 | 76.9 | 0.72 | 0.09 | 992 | ## | C3 Complement C3 precursor (Fragment) | n[145]LESEETM[147]VLEAHDQGDVPVTVVHDFPGK | 5 | 766.1965  | 3.224 | 0.154 |
| 147 | IPI00783987 | 1 | 76.9 | 0.72 | 0.09 | 992 | ## | C3 Complement C3 precursor (Fragment) | n[145]LM[147]NIFLK[272]                 | 2 | 591.8616  | 2.495 | 0.131 |
| 147 | IPI00783987 | 1 | 76.9 | 0.72 | 0.09 | 992 | ## | C3 Complement C3 precursor (Fragment) | n[145]RAPSTWLTAYVVK                     | 3 | 592.6812  | 3.507 | 0.282 |
| 147 | IPI00783987 | 1 | 76.9 | 0.72 | 0.09 | 992 | ## | C3 Complement C3 precursor (Fragment) | LESEETM[147]VLEAHDQGDVPVTVVHDFPGK       | 5 | 763.7923  | 2.446 | 0.068 |
| 147 | IPI00783987 | 1 | 76.9 | 0.72 | 0.09 | 992 | ## | C3 Complement C3 precursor (Fragment) | n[145]QLANGVDR                          | 2 | 508.7839  | 2.116 | 0.205 |
| 147 | IPI00783987 | 1 | 76.9 | 0.72 | 0.09 | 992 | ## | C3 Complement C3 precursor (Fragment) | n[145]EYVLPSEFVIVEPTEK[272]             | 3 | 723.0641  | 2.84  | 0.189 |
| 147 | IPI00783987 | 1 | 76.9 | 0.72 | 0.09 | 992 | ## | C3 Complement C3 precursor (Fragment) | n[145]SNNYLHLSVLR                       | 3 | 487.2761  | 3.104 | 0.315 |
| 147 | IPI00783987 | 1 | 76.9 | 0.72 | 0.09 | 992 | ## | C3 Complement C3 precursor (Fragment) | DSITTWEILAVSM[147]SDK                   | 2 | 1046.5352 | 3.073 | 0.285 |
| 147 | IPI00783987 | 1 | 76.9 | 0.72 | 0.09 | 992 | ## | C3 Complement C3 precursor (Fragment) | FYHPEKEDGK                              | 2 | 835.4385  | 3.26  | 0.281 |
| 147 | IPI00783987 | 1 | 76.9 | 0.72 | 0.09 | 992 | ## | C3 Complement C3 precursor (Fragment) | n[145]FYHPEK[272]EDGK[272]LNK[272]      | 4 | 546.0593  | 2.242 | 0.125 |
| 147 | IPI00783987 | 1 | 76.9 | 0.72 | 0.09 | 992 | ## | C3 Complement C3 precursor (Fragment) | LVLSEK                                  | 2 | 528.3266  | 2.076 | 0.087 |
| 147 | IPI00783987 | 1 | 76.9 | 0.72 | 0.09 | 992 | ## | C3 Complement C3 precursor (Fragment) | VVPEGIR                                 | 2 | 455.2795  | 2.015 | 0.237 |
| 147 | IPI00783987 | 1 | 76.9 | 0.72 | 0.09 | 992 | ## | C3 Complement C3 precursor (Fragment) | VVPEGIR                                 | 1 | 909.5517  | 1.756 | 0.185 |

|     |             |   |      |      |      |     |    |                                       |                                    |   |           |       |       |
|-----|-------------|---|------|------|------|-----|----|---------------------------------------|------------------------------------|---|-----------|-------|-------|
| 147 | IPI00783987 | 1 | 76.9 | 0.72 | 0.09 | 992 | ## | C3 Complement C3 precursor (Fragment) | VQLSNDFDEYIM[147]AIEQTIK           | 4 | 639.0781  | 2.941 | 0.114 |
| 147 | IPI00783987 | 1 | 76.9 | 0.72 | 0.09 | 992 | ## | C3 Complement C3 precursor (Fragment) | n[145]LVLSSSEK[272]                | 2 | 532.3337  | 1.882 | 0.125 |
| 147 | IPI00783987 | 1 | 76.9 | 0.72 | 0.09 | 992 | ## | C3 Complement C3 precursor (Fragment) | QPSSAFAAFVK                        | 2 | 716.901   | 2.204 | 0.246 |
| 147 | IPI00783987 | 1 | 76.9 | 0.72 | 0.09 | 992 | ## | C3 Complement C3 precursor (Fragment) | LKGPLLNK                           | 2 | 651.9347  | 2.784 | 0.226 |
| 147 | IPI00783987 | 1 | 76.9 | 0.72 | 0.09 | 992 | ## | C3 Complement C3 precursor (Fragment) | RQGALELIKK                         | 4 | 394.7569  | 2.131 | 0.086 |
| 147 | IPI00783987 | 1 | 76.9 | 0.72 | 0.09 | 992 | ## | C3 Complement C3 precursor (Fragment) | LM[147]NIFLK                       | 2 | 587.8545  | 2.594 | 0.105 |
| 147 | IPI00783987 | 1 | 76.9 | 0.72 | 0.09 | 992 | ## | C3 Complement C3 precursor (Fragment) | QGALELIK                           | 2 | 576.361   | 1.929 | 0.088 |
| 147 | IPI00783987 | 1 | 76.9 | 0.72 | 0.09 | 992 | ## | C3 Complement C3 precursor (Fragment) | n[145]LK[272]GPLLNK[272]           | 2 | 657.9453  | 2.651 | 0.226 |
| 147 | IPI00783987 | 1 | 76.9 | 0.72 | 0.09 | 992 | ## | C3 Complement C3 precursor (Fragment) | n[145]TIYTPGSTVLYR                 | 1 | 1514.8336 | 2.441 | 0.436 |
| 147 | IPI00783987 | 1 | 76.9 | 0.72 | 0.09 | 992 | ## | C3 Complement C3 precursor (Fragment) | n[145]LCRDELRCR                    | 3 | 415.1894  | 1.44  | 0.108 |
| 147 | IPI00783987 | 1 | 76.9 | 0.72 | 0.09 | 992 | ## | C3 Complement C3 precursor (Fragment) | FYHPEK                             | 2 | 550.798   | 1.708 | 0.023 |
| 147 | IPI00783987 | 1 | 76.9 | 0.72 | 0.09 | 992 | ## | C3 Complement C3 precursor (Fragment) | AKDQLTCNKFDLK                      | 3 | 710.7236  | 2.694 | 0.201 |
| 147 | IPI00783987 | 1 | 76.9 | 0.72 | 0.09 | 992 | ## | C3 Complement C3 precursor (Fragment) | STVGSNNYLHLSVLR                    | 3 | 638.6779  | 3.467 | 0.296 |
| 147 | IPI00783987 | 1 | 76.9 | 0.72 | 0.09 | 992 | ## | C3 Complement C3 precursor (Fragment) | RQGALELIKK                         | 3 | 526.0068  | 3.009 | 0.065 |
| 147 | IPI00783987 | 1 | 76.9 | 0.72 | 0.09 | 992 | ## | C3 Complement C3 precursor (Fragment) | n[145]RPQDAK[272]NTM[147]ILEICTR   | 4 | 560.5455  | 3.168 | 0.351 |
| 147 | IPI00783987 | 1 | 76.9 | 0.72 | 0.09 | 992 | ## | C3 Complement C3 precursor (Fragment) | KLVLSSSEK                          | 3 | 441.9502  | 2.618 | 0.163 |
| 147 | IPI00783987 | 1 | 76.9 | 0.72 | 0.09 | 992 | ## | C3 Complement C3 precursor (Fragment) | n[145]FLTTAK[272]                  | 2 | 484.8046  | 2.068 | 0.107 |
| 147 | IPI00783987 | 1 | 76.9 | 0.72 | 0.09 | 992 | ## | C3 Complement C3 precursor (Fragment) | n[145]ELLHNPFCSLATTK[272]          | 3 | 660.3493  | 3.941 | 0.25  |
| 147 | IPI00783987 | 1 | 76.9 | 0.72 | 0.09 | 992 | ## | C3 Complement C3 precursor (Fragment) | TVM[147]VNIENPEGIPVK               | 2 | 968.5323  | 3.762 | 0.407 |
| 147 | IPI00783987 | 1 | 76.9 | 0.72 | 0.09 | 992 | ## | C3 Complement C3 precursor (Fragment) | n[145]FYHPEK[272]EDGK[272]         | 2 | 841.4492  | 3.512 | 0.192 |
| 147 | IPI00783987 | 1 | 76.9 | 0.72 | 0.09 | 992 | ## | C3 Complement C3 precursor (Fragment) | n[145]QK[272]PDGVFQEDAPVIHQEMIGGLR | 4 | 713.8797  | 2.917 | 0.059 |
| 147 | IPI00783987 | 1 | 76.9 | 0.72 | 0.09 | 992 | ## | C3 Complement C3 precursor (Fragment) | n[145]LMNIFLK[272]                 | 2 | 583.8641  | 2.13  | 0.115 |
| 147 | IPI00783987 | 1 | 76.9 | 0.72 | 0.09 | 992 | ## | C3 Complement C3 precursor (Fragment) | n[145]RQGALELIK[272]K[272]         | 3 | 530.0139  | 3.137 | 0.051 |
| 147 | IPI00783987 | 1 | 76.9 | 0.72 | 0.09 | 992 | ## | C3 Complement C3 precursor (Fragment) | TFISPIK                            | 2 | 543.3395  | 2.318 | 0.092 |
| 147 | IPI00783987 | 1 | 76.9 | 0.72 | 0.09 | 992 | ## | C3 Complement C3 precursor (Fragment) | n[145]AK[272]DQLTCNK[272]FDLK[272] | 4 | 537.3017  | 2.351 | 0.143 |
| 147 | IPI00783987 | 1 | 76.9 | 0.72 | 0.09 | 992 | ## | C3 Complement C3 precursor (Fragment) | n[145]FLYGK[272]K[272]             | 2 | 594.3793  | 2     | 0.116 |
| 147 | IPI00783987 | 1 | 76.9 | 0.72 | 0.09 | 992 | ## | C3 Complement C3 precursor (Fragment) | QPVPQQM[147]TLK                    | 2 | 761.9242  | 2.456 | 0.117 |
| 147 | IPI00783987 | 1 | 76.9 | 0.72 | 0.09 | 992 | ## | C3 Complement C3 precursor (Fragment) | n[145]TFISPIK[272]                 | 2 | 547.3466  | 2.153 | 0.126 |
| 147 | IPI00783987 | 1 | 76.9 | 0.72 | 0.09 | 992 | ## | C3 Complement C3 precursor (Fragment) | FYHPEKEDGKLNK                      | 4 | 542.0522  | 2.018 | 0.191 |
| 147 | IPI00783987 | 1 | 76.9 | 0.72 | 0.09 | 992 | ## | C3 Complement C3 precursor (Fragment) | ISLPESLK                           | 2 | 583.8608  | 2.635 | 0.19  |
| 147 | IPI00783987 | 1 | 76.9 | 0.72 | 0.09 | 992 | ## | C3 Complement C3 precursor (Fragment) | n[145]ISLPESLK[272]                | 2 | 587.8679  | 2.624 | 0.099 |
| 147 | IPI00783987 | 1 | 76.9 | 0.72 | 0.09 | 992 | ## | C3 Complement C3 precursor (Fragment) | n[145]SDDK[272]VTLEER              | 2 | 740.3983  | 3.095 | 0.214 |
| 147 | IPI00783987 | 1 | 76.9 | 0.72 | 0.09 | 992 | ## | C3 Complement C3 precursor (Fragment) | n[145]FYHPEK[272]                  | 2 | 554.8051  | 1.941 | 0.042 |
| 147 | IPI00783987 | 1 | 76.9 | 0.72 | 0.09 | 992 | ## | C3 Complement C3 precursor (Fragment) | n[145]QGALELIK[272]                | 2 | 580.3681  | 2.563 | 0.019 |
| 147 | IPI00783987 | 1 | 76.9 | 0.72 | 0.09 | 992 | ## | C3 Complement C3 precursor (Fragment) | LSINTHPSQKPLSITVR                  | 4 | 543.572   | 1.703 | 0.066 |
| 147 | IPI00783987 | 1 | 76.9 | 0.72 | 0.09 | 992 | ## | C3 Complement C3 precursor (Fragment) | n[145]APSTWLTAYVVK                 | 2 | 810.4675  | 1.94  | 0.202 |
| 147 | IPI00783987 | 1 | 76.9 | 0.72 | 0.09 | 992 | ## | C3 Complement C3 precursor (Fragment) | EYVLPSEFVIVEPTEK                   | 3 | 720.3927  | 2.539 | 0.12  |
| 147 | IPI00783987 | 1 | 76.9 | 0.72 | 0.09 | 992 | ## | C3 Complement C3 precursor (Fragment) | n[145]FYHPEK[272]EDGK[272]         | 4 | 421.2282  | 2.038 | 0.007 |
| 147 | IPI00783987 | 1 | 76.9 | 0.72 | 0.09 | 992 | ## | C3 Complement C3 precursor (Fragment) | IPIEDGSGEVVLSR                     | 2 | 805.9411  | 2.476 | 0.122 |
| 147 | IPI00783987 | 1 | 76.9 | 0.72 | 0.09 | 992 | ## | C3 Complement C3 precursor (Fragment) | n[145]WEDPGK[272]                  | 2 | 510.2737  | 2.053 | 0.132 |
| 147 | IPI00783987 | 1 | 76.9 | 0.72 | 0.09 | 992 | ## | C3 Complement C3 precursor (Fragment) | n[145]WEDPGK[272]                  | 1 | 1019.5401 | 1.65  | 0.073 |
| 147 | IPI00783987 | 1 | 76.9 | 0.72 | 0.09 | 992 | ## | C3 Complement C3 precursor (Fragment) | NKLTQSK                            | 3 | 413.5909  | 2.096 | 0.203 |
| 147 | IPI00783987 | 1 | 76.9 | 0.72 | 0.09 | 992 | ## | C3 Complement C3 precursor (Fragment) | GPLLNK                             | 2 | 461.2977  | 2.18  | 0.04  |
| 147 | IPI00783987 | 1 | 76.9 | 0.72 | 0.09 | 992 | ## | C3 Complement C3 precursor (Fragment) | n[145]FISLGEACK[272]               | 3 | 434.5661  | 2.15  | 0.113 |
| 147 | IPI00783987 | 1 | 76.9 | 0.72 | 0.09 | 992 | ## | C3 Complement C3 precursor (Fragment) | n[145]RQGALELIK[272]               | 2 | 658.4187  | 2.666 | 0.032 |
| 147 | IPI00783987 | 1 | 76.9 | 0.72 | 0.09 | 992 | ## | C3 Complement C3 precursor (Fragment) | n[145]APVIHQEM[147]IGGLR           | 3 | 527.6282  | 2.925 | 0.257 |
| 147 | IPI00783987 | 1 | 76.9 | 0.72 | 0.09 | 992 | ## | C3 Complement C3 precursor (Fragment) | n[145]AAVYHHFISD                   | 2 | 652.3312  | 3.35  | 0.399 |
| 147 | IPI00783987 | 1 | 76.9 | 0.72 | 0.09 | 992 | ## | C3 Complement C3 precursor (Fragment) | SGIPIVTSPIYQIHF                    | 2 | 849.9643  | 3.635 | 0.449 |

|     |             |   |      |      |      |     |    |                                       |                                             |   |           |       |       |
|-----|-------------|---|------|------|------|-----|----|---------------------------------------|---------------------------------------------|---|-----------|-------|-------|
| 147 | IPI00783987 | 1 | 76.9 | 0.72 | 0.09 | 992 | ## | C3 Complement C3 precursor (Fragment) | WEDPGK                                      | 2 | 506.2666  | 1.587 | 0.192 |
| 147 | IPI00783987 | 1 | 76.9 | 0.72 | 0.09 | 992 | ## | C3 Complement C3 precursor (Fragment) | FYHPEKEDGKLNK                               | 3 | 722.4004  | 2.733 | 0.176 |
| 147 | IPI00783987 | 1 | 76.9 | 0.72 | 0.09 | 992 | ## | C3 Complement C3 precursor (Fragment) | n[145]YTLIGASGQR                            | 2 | 605.3391  | 3.501 | 0.361 |
| 147 | IPI00783987 | 1 | 76.9 | 0.72 | 0.09 | 992 | ## | C3 Complement C3 precursor (Fragment) | n[145]TVLTPATNHM[147]G                      | 2 | 651.3357  | 2.759 | 0.158 |
| 147 | IPI00783987 | 1 | 76.9 | 0.72 | 0.09 | 992 | ## | C3 Complement C3 precursor (Fragment) | n[145]SLK[272]VVPEGIR                       | 3 | 462.6288  | 2.54  | 0.135 |
| 147 | IPI00783987 | 1 | 76.9 | 0.72 | 0.09 | 992 | ## | C3 Complement C3 precursor (Fragment) | KLVLSSSEK                                   | 2 | 662.4216  | 3.209 | 0.294 |
| 147 | IPI00783987 | 1 | 76.9 | 0.72 | 0.09 | 992 | ## | C3 Complement C3 precursor (Fragment) | n[145]DVPVTVTVHDFPGK[272]                   | 3 | 600.3362  | 2.532 | 0.285 |
| 147 | IPI00783987 | 1 | 76.9 | 0.72 | 0.09 | 992 | ## | C3 Complement C3 precursor (Fragment) | WEDPGK                                      | 1 | 1011.5259 | 1.792 | 0.045 |
| 147 | IPI00783987 | 1 | 76.9 | 0.72 | 0.09 | 992 | ## | C3 Complement C3 precursor (Fragment) | EVVADSVVVDVK[272]                           | 2 | 815.4521  | 3.24  | 0.186 |
| 147 | IPI00783987 | 1 | 76.9 | 0.72 | 0.09 | 992 | ## | C3 Complement C3 precursor (Fragment) | n[145]VYHHFISDGVV                           | 2 | 737.3896  | 3.818 | 0.388 |
| 147 | IPI00783987 | 1 | 76.9 | 0.72 | 0.09 | 992 | ## | C3 Complement C3 precursor (Fragment) | n[145]EALK[272]LEEK[272]                    | 2 | 696.4272  | 2.747 | 0.149 |
| 147 | IPI00783987 | 1 | 76.9 | 0.72 | 0.09 | 992 | ## | C3 Complement C3 precursor (Fragment) | QALAQYQK                                    | 2 | 615.3537  | 3.289 | 0.31  |
| 147 | IPI00783987 | 1 | 76.9 | 0.72 | 0.09 | 992 | ## | C3 Complement C3 precursor (Fragment) | n[145]SNNYLHLSVLR                           | 2 | 730.4105  | 3.798 | 0.334 |
| 147 | IPI00783987 | 1 | 76.9 | 0.72 | 0.09 | 992 | ## | C3 Complement C3 precursor (Fragment) | n[145]YFK[272]PGM[147]PFDLM[147]VFTNPDGSPAY | 4 | 768.1328  | 3.329 | 0.073 |
| 147 | IPI00783987 | 1 | 76.9 | 0.72 | 0.09 | 992 | ## | C3 Complement C3 precursor (Fragment) | n[145]NEQVEIR                               | 2 | 516.2837  | 2.256 | 0.021 |
| 147 | IPI00783987 | 1 | 76.9 | 0.72 | 0.09 | 992 | ## | C3 Complement C3 precursor (Fragment) | n[145]QVPDTESETR                            | 2 | 653.3238  | 2.53  | 0.477 |
| 147 | IPI00783987 | 1 | 76.9 | 0.72 | 0.09 | 992 | ## | C3 Complement C3 precursor (Fragment) | n[145]GYALAQM[147]GR                        | 2 | 563.7934  | 2.852 | 0.414 |
| 147 | IPI00783987 | 1 | 76.9 | 0.72 | 0.09 | 992 | ## | C3 Complement C3 precursor (Fragment) | LMNIFLK                                     | 2 | 579.857   | 2.015 | 0.067 |
| 147 | IPI00783987 | 1 | 76.9 | 0.72 | 0.09 | 992 | ## | C3 Complement C3 precursor (Fragment) | FYHPEKEDGK                                  | 4 | 418.2229  | 2.248 | 0.079 |
| 147 | IPI00783987 | 1 | 76.9 | 0.72 | 0.09 | 992 | ## | C3 Complement C3 precursor (Fragment) | EALKLEEK                                    | 2 | 690.4165  | 2.973 | 0.08  |
| 147 | IPI00783987 | 1 | 76.9 | 0.72 | 0.09 | 992 | ## | C3 Complement C3 precursor (Fragment) | KDQLTCNK                                    | 3 | 472.5881  | 2.836 | 0.269 |
| 147 | IPI00783987 | 1 | 76.9 | 0.72 | 0.09 | 992 | ## | C3 Complement C3 precursor (Fragment) | n[145]DSITTWEILAVSM[147]SDKK                | 3 | 788.7582  | 3.095 | 0.162 |
| 147 | IPI00783987 | 1 | 76.9 | 0.72 | 0.09 | 992 | ## | C3 Complement C3 precursor (Fragment) | n[145]SITTDIFPSFR                           | 2 | 714.3862  | 3.564 | 0.373 |
| 147 | IPI00783987 | 1 | 76.9 | 0.72 | 0.09 | 992 | ## | C3 Complement C3 precursor (Fragment) | n[145]IPYSVVR                               | 2 | 489.2987  | 1.877 | 0.088 |
| 147 | IPI00783987 | 1 | 76.9 | 0.72 | 0.09 | 992 | ## | C3 Complement C3 precursor (Fragment) | n[145]YTQQLAFR                              | 2 | 585.823   | 2.933 | 0.303 |
| 147 | IPI00783987 | 1 | 76.9 | 0.72 | 0.09 | 992 | ## | C3 Complement C3 precursor (Fragment) | VELLHNPAFCSL                                | 2 | 764.8862  | 2.821 | 0.378 |
| 147 | IPI00783987 | 1 | 76.9 | 0.72 | 0.09 | 992 | ## | C3 Complement C3 precursor (Fragment) | n[145]TIK[272]PAPETEK[272]                  | 2 | 773.4643  | 2.865 | 0.34  |
| 147 | IPI00783987 | 1 | 76.9 | 0.72 | 0.09 | 992 | ## | C3 Complement C3 precursor (Fragment) | n[145]SGSDMVQAER                            | 2 | 612.294   | 3.037 | 0.317 |
| 147 | IPI00783987 | 1 | 76.9 | 0.72 | 0.09 | 992 | ## | C3 Complement C3 precursor (Fragment) | VYHHFISDGVV                                 | 2 | 735.3861  | 2.995 | 0.365 |
| 147 | IPI00783987 | 1 | 76.9 | 0.72 | 0.09 | 992 | ## | C3 Complement C3 precursor (Fragment) | n[145]FYHPEK[272]                           | 3 | 370.2058  | 1.968 | 0.048 |
| 147 | IPI00783987 | 1 | 76.9 | 0.72 | 0.09 | 992 | ## | C3 Complement C3 precursor (Fragment) | n[145]SPMYSIITPNILR                         | 2 | 824.9643  | 3.176 | 0.355 |
| 147 | IPI00783987 | 1 | 76.9 | 0.72 | 0.09 | 992 | ## | C3 Complement C3 precursor (Fragment) | n[145]FSCQR                                 | 2 | 415.6921  | 1.625 | 0.018 |
| 147 | IPI00783987 | 1 | 76.9 | 0.72 | 0.09 | 992 | ## | C3 Complement C3 precursor (Fragment) | NKLTQSK                                     | 2 | 619.8827  | 2.192 | 0.172 |
| 147 | IPI00783987 | 1 | 76.9 | 0.72 | 0.09 | 992 | ## | C3 Complement C3 precursor (Fragment) | n[145]IEDGSGEVVLSR                          | 2 | 702.8762  | 3.367 | 0.343 |
| 147 | IPI00783987 | 1 | 76.9 | 0.72 | 0.09 | 992 | ## | C3 Complement C3 precursor (Fragment) | n[145]QALAQYQK[272]                         | 2 | 619.3608  | 3.112 | 0.274 |
| 147 | IPI00783987 | 1 | 76.9 | 0.72 | 0.09 | 992 | ## | C3 Complement C3 precursor (Fragment) | n[145]SGIPIVTSYQIHF                         | 2 | 778.4337  | 3.517 | 0.383 |
| 147 | IPI00783987 | 1 | 76.9 | 0.72 | 0.09 | 992 | ## | C3 Complement C3 precursor (Fragment) | n[145]ASHLGLAR                              | 3 | 323.5301  | 1.951 | 0.108 |
| 147 | IPI00783987 | 1 | 76.9 | 0.72 | 0.09 | 992 | ## | C3 Complement C3 precursor (Fragment) | FLTTAK                                      | 2 | 480.7975  | 1.642 | 0.035 |
| 147 | IPI00783987 | 1 | 76.9 | 0.72 | 0.09 | 992 | ## | C3 Complement C3 precursor (Fragment) | n[145]SGIPIVTSYQIHF                         | 2 | 851.9679  | 3.163 | 0.312 |
| 147 | IPI00783987 | 1 | 76.9 | 0.72 | 0.09 | 992 | ## | C3 Complement C3 precursor (Fragment) | YYGGGYGSTQATF                               | 2 | 756.3437  | 2.483 | 0.393 |
| 147 | IPI00783987 | 1 | 76.9 | 0.72 | 0.09 | 992 | ## | C3 Complement C3 precursor (Fragment) | n[145]TVLTPATNH                             | 2 | 549.3072  | 2.935 | 0.306 |
| 147 | IPI00783987 | 1 | 76.9 | 0.72 | 0.09 | 992 | ## | C3 Complement C3 precursor (Fragment) | AAVYHHFISD                                  | 2 | 650.3277  | 2.739 | 0.386 |
| 147 | IPI00783987 | 1 | 76.9 | 0.72 | 0.09 | 992 | ## | C3 Complement C3 precursor (Fragment) | n[145]VLISLQEAK[272]                        | 2 | 644.9076  | 2.303 | 0.159 |
| 147 | IPI00783987 | 1 | 76.9 | 0.72 | 0.09 | 992 | ## | C3 Complement C3 precursor (Fragment) | ASHLGLAR                                    | 1 | 964.5687  | 1.819 | 0.008 |
| 147 | IPI00783987 | 1 | 76.9 | 0.72 | 0.09 | 992 | ## | C3 Complement C3 precursor (Fragment) | n[145]TVLTPATNHM[147]                       | 2 | 622.8249  | 3.275 | 0.264 |
| 147 | IPI00783987 | 1 | 76.9 | 0.72 | 0.09 | 992 | ## | C3 Complement C3 precursor (Fragment) | n[145]SLK[272]VVPEGIR                       | 2 | 693.4396  | 1.835 | 0.238 |
| 147 | IPI00783987 | 1 | 76.9 | 0.72 | 0.09 | 992 | ## | C3 Complement C3 precursor (Fragment) | VGKYPK                                      | 2 | 556.353   | 1.803 | 0.16  |
| 147 | IPI00783987 | 1 | 76.9 | 0.72 | 0.09 | 992 | ## | C3 Complement C3 precursor (Fragment) | n[145]YYTYLIM[147]NK[272]                   | 3 | 504.9385  | 2.321 | 0.002 |

|     |             |   |      |      |      |     |    |                                       |                                          |   |           |       |       |
|-----|-------------|---|------|------|------|-----|----|---------------------------------------|------------------------------------------|---|-----------|-------|-------|
| 147 | IPI00783987 | 1 | 76.9 | 0.72 | 0.09 | 992 | ## | C3 Complement C3 precursor (Fragment) | n[145]LCRDELRCR                          | 2 | 622.2804  | 2.554 | 0.026 |
| 147 | IPI00783987 | 1 | 76.9 | 0.72 | 0.09 | 992 | ## | C3 Complement C3 precursor (Fragment) | AAVYHHF                                  | 3 | 328.8399  | 2.305 | 0.206 |
| 147 | IPI00783987 | 1 | 76.9 | 0.72 | 0.09 | 992 | ## | C3 Complement C3 precursor (Fragment) | n[145]FGLEK[272]                         | 2 | 441.2704  | 1.569 | 0.107 |
| 147 | IPI00783987 | 1 | 76.9 | 0.72 | 0.09 | 992 | ## | C3 Complement C3 precursor (Fragment) | YYTYLIM[147]JNK                          | 3 | 502.2671  | 3.248 | 0.002 |
| 147 | IPI00783987 | 1 | 76.9 | 0.72 | 0.09 | 992 | ## | C3 Complement C3 precursor (Fragment) | AKDQLTCNKFDLK                            | 4 | 533.2946  | 2.098 | 0.044 |
| 147 | IPI00783987 | 1 | 76.9 | 0.72 | 0.09 | 992 | ## | C3 Complement C3 precursor (Fragment) | n[145]QPVPVGGQM[147]TLK[272]             | 2 | 765.9313  | 2.308 | 0.04  |
| 147 | IPI00783987 | 1 | 76.9 | 0.72 | 0.09 | 992 | ## | C3 Complement C3 precursor (Fragment) | n[145]GQGTLSVVTMYH                       | 2 | 718.8699  | 3.091 | 0.339 |
| 147 | IPI00783987 | 1 | 76.9 | 0.72 | 0.09 | 992 | ## | C3 Complement C3 precursor (Fragment) | n[145]TLIIYLDK[272]                      | 2 | 633.8992  | 2.661 | 0.238 |
| 147 | IPI00783987 | 1 | 76.9 | 0.72 | 0.09 | 992 | ## | C3 Complement C3 precursor (Fragment) | n[145]SDEVQVGGQR                         | 2 | 645.332   | 3.362 | 0.223 |
| 147 | IPI00783987 | 1 | 76.9 | 0.72 | 0.09 | 992 | ## | C3 Complement C3 precursor (Fragment) | n[145]GSGEVVLSR                          | 2 | 524.2994  | 3.102 | 0.201 |
| 147 | IPI00783987 | 1 | 76.9 | 0.72 | 0.09 | 992 | ## | C3 Complement C3 precursor (Fragment) | n[145]STEFVK[272]                        | 2 | 564.313   | 2.806 | 0.212 |
| 147 | IPI00783987 | 1 | 76.9 | 0.72 | 0.09 | 992 | ## | C3 Complement C3 precursor (Fragment) | n[145]YHHFISDGVR                         | 2 | 687.8554  | 2.967 | 0.206 |
| 147 | IPI00783987 | 1 | 76.9 | 0.72 | 0.09 | 992 | ## | C3 Complement C3 precursor (Fragment) | n[145]CCEDGM[147]JR                      | 2 | 533.1742  | 1.132 | 0.171 |
| 147 | IPI00783987 | 1 | 76.9 | 0.72 | 0.09 | 992 | ## | C3 Complement C3 precursor (Fragment) | STEFVK                                   | 2 | 560.3059  | 2.934 | 0.188 |
| 147 | IPI00783987 | 1 | 76.9 | 0.72 | 0.09 | 992 | ## | C3 Complement C3 precursor (Fragment) | n[145]SDDK[272]VTLEER                    | 3 | 493.9346  | 2.009 | 0.044 |
| 147 | IPI00783987 | 1 | 76.9 | 0.72 | 0.09 | 992 | ## | C3 Complement C3 precursor (Fragment) | n[145]ELSEAEQATR                         | 2 | 639.3263  | 2.902 | 0.196 |
| 147 | IPI00783987 | 1 | 76.9 | 0.72 | 0.09 | 992 | ## | C3 Complement C3 precursor (Fragment) | n[145]DSITTWEILAVSM[147]SDK              | 2 | 1048.5388 | 3.763 | 0.268 |
| 147 | IPI00783987 | 1 | 76.9 | 0.72 | 0.09 | 992 | ## | C3 Complement C3 precursor (Fragment) | n[145]FVTVQATFGTQVVEK[272]               | 3 | 648.0345  | 2.311 | 0.061 |
| 147 | IPI00783987 | 1 | 76.9 | 0.72 | 0.09 | 992 | ## | C3 Complement C3 precursor (Fragment) | ALLALLQLK                                | 2 | 631.9316  | 2.845 | 0.222 |
| 147 | IPI00783987 | 1 | 76.9 | 0.72 | 0.09 | 992 | ## | C3 Complement C3 precursor (Fragment) | n[145]ALLALLQLK[272]                     | 2 | 635.9387  | 2.894 | 0.173 |
| 147 | IPI00783987 | 1 | 76.9 | 0.72 | 0.09 | 992 | ## | C3 Complement C3 precursor (Fragment) | n[145]VELLHNPAFCSL                       | 2 | 766.8897  | 2.705 | 0.382 |
| 147 | IPI00783987 | 1 | 76.9 | 0.72 | 0.09 | 992 | ## | C3 Complement C3 precursor (Fragment) | n[145]SPM[147]YSIITPNILR                 | 2 | 832.9618  | 2.883 | 0.36  |
| 147 | IPI00783987 | 1 | 76.9 | 0.72 | 0.09 | 992 | ## | C3 Complement C3 precursor (Fragment) | LSINTHPSQKPL                             | 3 | 538.9824  | 2.921 | 0.135 |
| 147 | IPI00783987 | 1 | 76.9 | 0.72 | 0.09 | 992 | ## | C3 Complement C3 precursor (Fragment) | SSAFAAFVK                                | 2 | 604.3454  | 2.607 | 0.233 |
| 147 | IPI00783987 | 1 | 76.9 | 0.72 | 0.09 | 992 | ## | C3 Complement C3 precursor (Fragment) | EALKLEEK                                 | 3 | 460.6134  | 2.139 | 0.072 |
| 147 | IPI00783987 | 1 | 76.9 | 0.72 | 0.09 | 992 | ## | C3 Complement C3 precursor (Fragment) | n[145]VELLHNPAFCSLA                      | 2 | 802.4083  | 1.838 | 0.429 |
| 147 | IPI00783987 | 1 | 76.9 | 0.72 | 0.09 | 992 | ## | C3 Complement C3 precursor (Fragment) | n[145]VELLHNPAFC                         | 2 | 666.8317  | 2.173 | 0.309 |
| 147 | IPI00783987 | 1 | 76.9 | 0.72 | 0.09 | 992 | ## | C3 Complement C3 precursor (Fragment) | n[145]EK[272]PNLSYIIGK[272]              | 3 | 565.3453  | 2.61  | 0.154 |
| 147 | IPI00783987 | 1 | 76.9 | 0.72 | 0.09 | 992 | ## | C3 Complement C3 precursor (Fragment) | n[145]NK[272]LTQSK[272]                  | 2 | 625.8933  | 1.948 | 0.157 |
| 147 | IPI00783987 | 1 | 76.9 | 0.72 | 0.09 | 992 | ## | C3 Complement C3 precursor (Fragment) | KNKLTQSK                                 | 4 | 377.4925  | 1.418 | 0.048 |
| 147 | IPI00783987 | 1 | 76.9 | 0.72 | 0.09 | 992 | ## | C3 Complement C3 precursor (Fragment) | n[145]LESEETM[147]VLEAHDAQGDVPVTVVHDFPGH | 4 | 957.4938  | 2.633 | 0.009 |
| 147 | IPI00783987 | 1 | 76.9 | 0.72 | 0.09 | 992 | ## | C3 Complement C3 precursor (Fragment) | n[145]SPM[147]YSIITPNILR                 | 3 | 555.6436  | 2.852 | 0.163 |
| 147 | IPI00783987 | 1 | 76.9 | 0.72 | 0.09 | 992 | ## | C3 Complement C3 precursor (Fragment) | n[145]YHHFISDGVR                         | 3 | 458.906   | 2.332 | 0.17  |
| 147 | IPI00783987 | 1 | 76.9 | 0.72 | 0.09 | 992 | ## | C3 Complement C3 precursor (Fragment) | n[145]SSAFAAFVK[272]                     | 2 | 608.3525  | 2.559 | 0.208 |
| 147 | IPI00783987 | 1 | 76.9 | 0.72 | 0.09 | 992 | ## | C3 Complement C3 precursor (Fragment) | SGIPIVTSYQIH                             | 2 | 776.4301  | 2.527 | 0.241 |
| 147 | IPI00783987 | 1 | 76.9 | 0.72 | 0.09 | 992 | ## | C3 Complement C3 precursor (Fragment) | n[145]VLYNYR                             | 2 | 486.2752  | 2.175 | 0.166 |
| 147 | IPI00783987 | 1 | 76.9 | 0.72 | 0.09 | 992 | ## | C3 Complement C3 precursor (Fragment) | n[145]VTNPDGSPAYR                        | 2 | 660.8369  | 2.797 | 0.246 |
| 147 | IPI00783987 | 1 | 76.9 | 0.72 | 0.09 | 992 | ## | C3 Complement C3 precursor (Fragment) | n[145]AAVYHHF                            | 2 | 494.7597  | 1.98  | 0.196 |
| 147 | IPI00783987 | 1 | 76.9 | 0.72 | 0.09 | 992 | ## | C3 Complement C3 precursor (Fragment) | LSYIIGK                                  | 2 | 537.3395  | 2.591 | 0.093 |
| 147 | IPI00783987 | 1 | 76.9 | 0.72 | 0.09 | 992 | ## | C3 Complement C3 precursor (Fragment) | n[145]TM[147]QALPYSTVGNSNNYLH            | 3 | 724.0167  | 3.387 | 0.125 |
| 147 | IPI00783987 | 1 | 76.9 | 0.72 | 0.09 | 992 | ## | C3 Complement C3 precursor (Fragment) | n[145]EALK[272]LEEK[272]                 | 3 | 464.6205  | 2.046 | 0.024 |
| 147 | IPI00783987 | 1 | 76.9 | 0.72 | 0.09 | 992 | ## | C3 Complement C3 precursor (Fragment) | KLM[147]NIFLK                            | 3 | 481.6354  | 2.356 | 0.216 |
| 147 | IPI00783987 | 1 | 76.9 | 0.72 | 0.09 | 992 | ## | C3 Complement C3 precursor (Fragment) | n[145]IPIEDGSGEVVLSR                     | 3 | 538.9655  | 2.305 | 0.077 |
| 147 | IPI00783987 | 1 | 76.9 | 0.72 | 0.09 | 992 | ## | C3 Complement C3 precursor (Fragment) | AAVYHHF                                  | 2 | 492.7562  | 1.757 | 0.252 |
| 147 | IPI00783987 | 1 | 76.9 | 0.72 | 0.09 | 992 | ## | C3 Complement C3 precursor (Fragment) | n[145]VFLDCCNYITELR                      | 3 | 608.9473  | 1.699 | 0.069 |
| 147 | IPI00783987 | 1 | 76.9 | 0.72 | 0.09 | 992 | ## | C3 Complement C3 precursor (Fragment) | n[145]AAVYHHFIS                          | 2 | 594.8178  | 1.783 | 0.308 |
| 147 | IPI00783987 | 1 | 76.9 | 0.72 | 0.09 | 992 | ## | C3 Complement C3 precursor (Fragment) | n[145]GALELIK[272]                       | 2 | 516.3388  | 2.193 | 0.147 |
| 147 | IPI00783987 | 1 | 76.9 | 0.72 | 0.09 | 992 | ## | C3 Complement C3 precursor (Fragment) | n[145]YYTLIGASGQR                        | 2 | 686.8707  | 2.59  | 0.192 |

|     |             |   |      |      |      |     |    |                                       |                                  |   |           |       |       |
|-----|-------------|---|------|------|------|-----|----|---------------------------------------|----------------------------------|---|-----------|-------|-------|
| 147 | IPI00783987 | 1 | 76.9 | 0.72 | 0.09 | 992 | ## | C3 Complement C3 precursor (Fragment) | KQELSEAEQA                       | 2 | 706.8727  | 2.317 | 0.199 |
| 147 | IPI00783987 | 1 | 76.9 | 0.72 | 0.09 | 992 | ## | C3 Complement C3 precursor (Fragment) | SEFPESWLWNVEDLKEPPK              | 3 | 917.4778  | 2.767 | 0.09  |
| 147 | IPI00783987 | 1 | 76.9 | 0.72 | 0.09 | 992 | ## | C3 Complement C3 precursor (Fragment) | KGPLLNK                          | 3 | 397.2642  | 2.681 | 0.133 |
| 147 | IPI00783987 | 1 | 76.9 | 0.72 | 0.09 | 992 | ## | C3 Complement C3 precursor (Fragment) | n[145]FDFVPPVVR                  | 2 | 610.3514  | 2.085 | 0.208 |
| 147 | IPI00783987 | 1 | 76.9 | 0.72 | 0.09 | 992 | ## | C3 Complement C3 precursor (Fragment) | QKPDGVFQED                       | 2 | 721.8674  | 2.159 | 0.147 |
| 147 | IPI00783987 | 1 | 76.9 | 0.72 | 0.09 | 992 | ## | C3 Complement C3 precursor (Fragment) | n[145]YFK[272]PGMPFDL            | 2 | 751.9015  | 2.096 | 0.175 |
| 147 | IPI00783987 | 1 | 76.9 | 0.72 | 0.09 | 992 | ## | C3 Complement C3 precursor (Fragment) | n[145]VELLHNPAPF                 | 2 | 592.3332  | 1.634 | 0.267 |
| 147 | IPI00783987 | 1 | 76.9 | 0.72 | 0.09 | 992 | ## | C3 Complement C3 precursor (Fragment) | VGKYPK                           | 3 | 371.2378  | 1.282 | 0.115 |
| 147 | IPI00783987 | 1 | 76.9 | 0.72 | 0.09 | 992 | ## | C3 Complement C3 precursor (Fragment) | GALELIK                          | 2 | 512.3317  | 2.205 | 0.094 |
| 147 | IPI00783987 | 1 | 76.9 | 0.72 | 0.09 | 992 | ## | C3 Complement C3 precursor (Fragment) | AAFVK                            | 2 | 408.2606  | 1.708 | 0.136 |
| 147 | IPI00783987 | 1 | 76.9 | 0.72 | 0.09 | 992 | ## | C3 Complement C3 precursor (Fragment) | n[145]YYIYNEK[272]               | 2 | 640.8419  | 2.4   | 0.022 |
| 147 | IPI00783987 | 1 | 76.9 | 0.72 | 0.09 | 992 | ## | C3 Complement C3 precursor (Fragment) | n[145]ILEICTR                    | 2 | 519.2838  | 2.103 | 0.069 |
| 147 | IPI00783987 | 1 | 76.9 | 0.72 | 0.09 | 992 | ## | C3 Complement C3 precursor (Fragment) | TIKPAPETEK                       | 3 | 511.9715  | 2.56  | 0.065 |
| 147 | IPI00783987 | 1 | 76.9 | 0.72 | 0.09 | 992 | ## | C3 Complement C3 precursor (Fragment) | n[145]YSVVR                      | 2 | 384.2303  | 1.803 | 0.049 |
| 147 | IPI00783987 | 1 | 76.9 | 0.72 | 0.09 | 992 | ## | C3 Complement C3 precursor (Fragment) | n[145]TELRPGETLNVN               | 2 | 743.9027  | 2.537 | 0.06  |
| 147 | IPI00783987 | 1 | 76.9 | 0.72 | 0.09 | 992 | ## | C3 Complement C3 precursor (Fragment) | n[145]GQGTLSVVTM[147]Y           | 2 | 658.3379  | 2.356 | 0.131 |
| 147 | IPI00783987 | 1 | 76.9 | 0.72 | 0.09 | 992 | ## | C3 Complement C3 precursor (Fragment) | n[145]AAVYHH                     | 2 | 421.2255  | 1.503 | 0.193 |
| 147 | IPI00783987 | 1 | 76.9 | 0.72 | 0.09 | 992 | ## | C3 Complement C3 precursor (Fragment) | n[145]VTIK[272]PAPE              | 2 | 571.8548  | 1.867 | 0.129 |
| 147 | IPI00783987 | 1 | 76.9 | 0.72 | 0.09 | 992 | ## | C3 Complement C3 precursor (Fragment) | n[145]YSVVR                      | 1 | 767.4533  | 1.967 | 0.106 |
| 147 | IPI00783987 | 1 | 76.9 | 0.72 | 0.09 | 992 | ## | C3 Complement C3 precursor (Fragment) | n[145]YM[147]NLQR                | 2 | 492.7563  | 1.672 | 0.14  |
| 147 | IPI00783987 | 1 | 76.9 | 0.72 | 0.09 | 992 | ## | C3 Complement C3 precursor (Fragment) | GEKPNLSYIIGK                     | 3 | 580.3454  | 3.147 | 0.058 |
| 147 | IPI00783987 | 1 | 76.9 | 0.72 | 0.09 | 992 | ## | C3 Complement C3 precursor (Fragment) | n[145]TIYTPGSTVLY                | 2 | 679.8699  | 2.056 | 0.163 |
| 147 | IPI00783987 | 1 | 76.9 | 0.72 | 0.09 | 992 | ## | C3 Complement C3 precursor (Fragment) | n[145]LSINTHPSQK[272]            | 3 | 471.6082  | 2.633 | 0.091 |
| 147 | IPI00783987 | 1 | 76.9 | 0.72 | 0.09 | 992 | ## | C3 Complement C3 precursor (Fragment) | n[145]VYAYYNL                    | 1 | 1049.5425 | 1.726 | 0.248 |
| 147 | IPI00783987 | 1 | 76.9 | 0.72 | 0.09 | 992 | ## | C3 Complement C3 precursor (Fragment) | n[145]SGEVVLSR                   | 2 | 495.7887  | 2.053 | 0.028 |
| 147 | IPI00783987 | 1 | 76.9 | 0.72 | 0.09 | 992 | ## | C3 Complement C3 precursor (Fragment) | n[145]HLIVTPSGCG                 | 2 | 587.2975  | 1.728 | 0.131 |
| 147 | IPI00783987 | 1 | 76.9 | 0.72 | 0.09 | 992 | ## | C3 Complement C3 precursor (Fragment) | VTIKPAPE                         | 2 | 567.8477  | 1.903 | 0.195 |
| 147 | IPI00783987 | 1 | 76.9 | 0.72 | 0.09 | 992 | ## | C3 Complement C3 precursor (Fragment) | KVEGTAF                          | 2 | 516.2979  | 1.723 | 0.155 |
| 147 | IPI00783987 | 1 | 76.9 | 0.72 | 0.09 | 992 | ## | C3 Complement C3 precursor (Fragment) | FISDGVV                          | 2 | 467.2613  | 1.879 | 0.07  |
| 147 | IPI00783987 | 1 | 76.9 | 0.72 | 0.09 | 992 | ## | C3 Complement C3 precursor (Fragment) | n[145]FISDGVV                    | 2 | 469.2648  | 2.187 | 0.054 |
| 147 | IPI00783987 | 1 | 76.9 | 0.72 | 0.09 | 992 | ## | C3 Complement C3 precursor (Fragment) | n[145]IPIVTSFYQIHFTK             | 2 | 964.56    | 2.995 | 0.43  |
| 147 | IPI00783987 | 1 | 76.9 | 0.72 | 0.09 | 992 | ## | C3 Complement C3 precursor (Fragment) | n[145]VPGQQM[147]TLK[272]        | 2 | 653.3756  | 1.773 | 0.086 |
| 147 | IPI00783987 | 1 | 76.9 | 0.72 | 0.09 | 992 | ## | C3 Complement C3 precursor (Fragment) | n[145]IWDVVEK                    | 2 | 586.8435  | 2.029 | 0.058 |
| 147 | IPI00783987 | 1 | 76.9 | 0.72 | 0.09 | 992 | ## | C3 Complement C3 precursor (Fragment) | n[145]RPQDAK[272]NTM[147]ILEICTR | 3 | 747.0582  | 2.737 | 0.13  |
| 147 | IPI00783987 | 1 | 76.9 | 0.72 | 0.09 | 992 | ## | C3 Complement C3 precursor (Fragment) | AAVYHHF                          | 1 | 984.5051  | 2.314 | 0.401 |
| 147 | IPI00783987 | 1 | 76.9 | 0.72 | 0.09 | 992 | ## | C3 Complement C3 precursor (Fragment) | n[145]YFK[272]PGM[147]PF         | 2 | 645.8434  | 1.63  | 0.117 |
| 147 | IPI00783987 | 1 | 76.9 | 0.72 | 0.09 | 992 | ## | C3 Complement C3 precursor (Fragment) | n[145]LSYIIGK[272]               | 2 | 541.3466  | 1.895 | 0.016 |
| 147 | IPI00783987 | 1 | 76.9 | 0.72 | 0.09 | 992 | ## | C3 Complement C3 precursor (Fragment) | n[145]SGIPIVTSFYQIHIF            | 3 | 568.3143  | 1.905 | 0.079 |
| 148 | IPI00796379 | 1 | 34.5 | 1.51 | 0.35 | 8   | 7  | B2M B2M protein                       | n[145]VEHSDLSFSK[272]            | 2 | 718.8849  | 3.779 | 0.445 |
| 148 | IPI00796379 | 1 | 34.5 | 1.51 | 0.35 | 8   | 7  | B2M B2M protein                       | n[145]VEHSDLSFSK[272]            | 3 | 479.5923  | 3.37  | 0.283 |
| 148 | IPI00796379 | 1 | 34.5 | 1.51 | 0.35 | 8   | 7  | B2M B2M protein                       | VEHSDLSFSK                       | 2 | 714.8778  | 3.47  | 0.434 |
| 148 | IPI00796379 | 1 | 34.5 | 1.51 | 0.35 | 8   | 7  | B2M B2M protein                       | VSGFHPSDIEVDLLK                  | 3 | 646.0228  | 3.84  | 0.332 |
| 148 | IPI00796379 | 1 | 34.5 | 1.51 | 0.35 | 8   | 7  | B2M B2M protein                       | VNHVTLISQPK                      | 3 | 468.277   | 2.417 | 0.194 |
| 148 | IPI00796379 | 1 | 34.5 | 1.51 | 0.35 | 8   | 7  | B2M B2M protein                       | n[145]IQVYSR                     | 2 | 455.2674  | 1.816 | 0.037 |
| 148 | IPI00796379 | 1 | 34.5 | 1.51 | 0.35 | 8   | 7  | B2M B2M protein                       | VEHSDLSFSK                       | 3 | 476.9209  | 2.522 | 0.059 |
| 149 | IPI00844156 | 1 | 56.4 | 0.77 | 0.04 | 24  | 48 | SERPINC1 SERPINC1 protein             | ATEDEGSEQKIPEATNR                | 2 | 1078.035  | 5.122 | 0.474 |
| 149 | IPI00844156 | 1 | 56.4 | 0.77 | 0.04 | 24  | 48 | SERPINC1 SERPINC1 protein             | FATTFYQHLADSK                    | 2 | 904.9702  | 5.586 | 0.442 |
| 149 | IPI00844156 | 1 | 56.4 | 0.77 | 0.04 | 24  | 48 | SERPINC1 SERPINC1 protein             | NDNDNIFLSPLSISTAFAM[147]TK       | 2 | 1298.1598 | 5.61  | 0.604 |

|     |             |   |      |      |      |    |    |                           |                                       |   |           |       |       |
|-----|-------------|---|------|------|------|----|----|---------------------------|---------------------------------------|---|-----------|-------|-------|
| 149 | IPI00844156 | 1 | 56.4 | 0.77 | 0.04 | 24 | 48 | SERPINC1 SERPINC1 protein | TSDQIHFFFAK                           | 2 | 810.9303  | 4.615 | 0.494 |
| 149 | IPI00844156 | 1 | 56.4 | 0.77 | 0.04 | 24 | 48 | SERPINC1 SERPINC1 protein | n[145]AFLEVNEEGSEAAASTAVVIAGR         | 2 | 1218.1304 | 6.161 | 0.519 |
| 149 | IPI00844156 | 1 | 56.4 | 0.77 | 0.04 | 24 | 48 | SERPINC1 SERPINC1 protein | n[145]ATEDEGSEQK[272]IPEATNR          | 2 | 1082.0421 | 5.633 | 0.526 |
| 149 | IPI00844156 | 1 | 56.4 | 0.77 | 0.04 | 24 | 48 | SERPINC1 SERPINC1 protein | n[145]FATTFYQHLADSK[272]              | 2 | 908.9773  | 4.136 | 0.498 |
| 149 | IPI00844156 | 1 | 56.4 | 0.77 | 0.04 | 24 | 48 | SERPINC1 SERPINC1 protein | n[145]NDNDNIFLSPLSISTAFAM[147]TK[272] | 2 | 1302.1669 | 6.123 | 0.525 |
| 149 | IPI00844156 | 1 | 56.4 | 0.77 | 0.04 | 24 | 48 | SERPINC1 SERPINC1 protein | n[145]TSDQIHFFFAK[272]                | 2 | 814.9374  | 4.303 | 0.452 |
| 149 | IPI00844156 | 1 | 56.4 | 0.77 | 0.04 | 24 | 48 | SERPINC1 SERPINC1 protein | ATEDEGSEQKIPEATNR                     | 3 | 719.0257  | 4.316 | 0.432 |
| 149 | IPI00844156 | 1 | 56.4 | 0.77 | 0.04 | 24 | 48 | SERPINC1 SERPINC1 protein | FATTFYQHLADSK                         | 3 | 603.6492  | 3.653 | 0.463 |
| 149 | IPI00844156 | 1 | 56.4 | 0.77 | 0.04 | 24 | 48 | SERPINC1 SERPINC1 protein | TSDQIHFFFAK                           | 3 | 540.956   | 3.174 | 0.359 |
| 149 | IPI00844156 | 1 | 56.4 | 0.77 | 0.04 | 24 | 48 | SERPINC1 SERPINC1 protein | n[145]FATTFYQHLADSK[272]              | 3 | 606.3206  | 4.512 | 0.378 |
| 149 | IPI00844156 | 1 | 56.4 | 0.77 | 0.04 | 24 | 48 | SERPINC1 SERPINC1 protein | KATEDEGSEQK                           | 3 | 547.953   | 3.234 | 0.319 |
| 149 | IPI00844156 | 1 | 56.4 | 0.77 | 0.04 | 24 | 48 | SERPINC1 SERPINC1 protein | KATEDEGSEQKIPEATNR                    | 3 | 808.4224  | 4.807 | 0.39  |
| 149 | IPI00844156 | 1 | 56.4 | 0.77 | 0.04 | 24 | 48 | SERPINC1 SERPINC1 protein | n[145]ATEDEGSEQK[272]IPEATNR          | 3 | 721.6971  | 4.138 | 0.313 |
| 149 | IPI00844156 | 1 | 56.4 | 0.77 | 0.04 | 24 | 48 | SERPINC1 SERPINC1 protein | n[145]NDNDNIFLSPLSISTAFAM[147]TK[272] | 3 | 868.447   | 2.584 | 0.132 |
| 149 | IPI00844156 | 1 | 56.4 | 0.77 | 0.04 | 24 | 48 | SERPINC1 SERPINC1 protein | n[145]TSDQIHFFFAK[272]                | 3 | 543.6274  | 2.621 | 0.225 |
| 149 | IPI00844156 | 1 | 56.4 | 0.77 | 0.04 | 24 | 48 | SERPINC1 SERPINC1 protein | n[145]EVPLNTIIFMGR                    | 2 | 767.4326  | 2.112 | 0.039 |
| 149 | IPI00844156 | 1 | 56.4 | 0.77 | 0.04 | 24 | 48 | SERPINC1 SERPINC1 protein | KATEDEGSEQKIPEATNR                    | 4 | 606.5686  | 2.92  | 0.36  |
| 149 | IPI00844156 | 1 | 56.4 | 0.77 | 0.04 | 24 | 48 | SERPINC1 SERPINC1 protein | EVPLNTIIFMGR                          | 2 | 765.4291  | 3.288 | 0.34  |
| 149 | IPI00844156 | 1 | 56.4 | 0.77 | 0.04 | 24 | 48 | SERPINC1 SERPINC1 protein | n[145]EVPLNTIIFM[147]GR               | 2 | 775.4301  | 2.835 | 0.306 |
| 149 | IPI00844156 | 1 | 56.4 | 0.77 | 0.04 | 24 | 48 | SERPINC1 SERPINC1 protein | ATEDEGSEQK                            | 2 | 687.3308  | 2.896 | 0.377 |
| 149 | IPI00844156 | 1 | 56.4 | 0.77 | 0.04 | 24 | 48 | SERPINC1 SERPINC1 protein | n[145]DIPMNPNCIYR                     | 2 | 771.8565  | 3.245 | 0.246 |
| 149 | IPI00844156 | 1 | 56.4 | 0.77 | 0.04 | 24 | 48 | SERPINC1 SERPINC1 protein | n[145]DIPM[147]NPM[147]CIYR           | 2 | 787.8514  | 1.997 | 0.196 |
| 149 | IPI00844156 | 1 | 56.4 | 0.77 | 0.04 | 24 | 48 | SERPINC1 SERPINC1 protein | n[145]ATEDEGSEQK[272]                 | 2 | 691.3379  | 2.563 | 0.266 |
| 149 | IPI00844156 | 1 | 56.4 | 0.77 | 0.04 | 24 | 48 | SERPINC1 SERPINC1 protein | n[145]DIPMNPMP[147]CIYR               | 2 | 779.854   | 3.33  | 0.249 |
| 149 | IPI00844156 | 1 | 56.4 | 0.77 | 0.04 | 24 | 48 | SERPINC1 SERPINC1 protein | EVPLNTIIFM[147]GR                     | 2 | 773.4265  | 2.727 | 0.081 |
| 149 | IPI00844156 | 1 | 56.4 | 0.77 | 0.04 | 24 | 48 | SERPINC1 SERPINC1 protein | FDTISEK                               | 2 | 560.3059  | 2.545 | 0.082 |
| 149 | IPI00844156 | 1 | 56.4 | 0.77 | 0.04 | 24 | 48 | SERPINC1 SERPINC1 protein | n[145]EVPLNTIIFM[147]GR               | 3 | 517.2891  | 3.049 | 0.102 |
| 149 | IPI00844156 | 1 | 56.4 | 0.77 | 0.04 | 24 | 48 | SERPINC1 SERPINC1 protein | n[145]VANPCVK[272]                    | 2 | 532.7954  | 1.904 | 0.15  |
| 149 | IPI00844156 | 1 | 56.4 | 0.77 | 0.04 | 24 | 48 | SERPINC1 SERPINC1 protein | n[145]DIPM[147]NPMCIYR                | 2 | 779.854   | 2.327 | 0.297 |
| 149 | IPI00844156 | 1 | 56.4 | 0.77 | 0.04 | 24 | 48 | SERPINC1 SERPINC1 protein | IPEATNR                               | 2 | 470.7642  | 1.64  | 0.169 |
| 149 | IPI00844156 | 1 | 56.4 | 0.77 | 0.04 | 24 | 48 | SERPINC1 SERPINC1 protein | DIPM[147]NPMCIYR                      | 2 | 777.8504  | 2.326 | 0.363 |
| 149 | IPI00844156 | 1 | 56.4 | 0.77 | 0.04 | 24 | 48 | SERPINC1 SERPINC1 protein | n[145]FATTFYQH                        | 2 | 579.7887  | 3.023 | 0.328 |
| 149 | IPI00844156 | 1 | 56.4 | 0.77 | 0.04 | 24 | 48 | SERPINC1 SERPINC1 protein | n[145]VWELSK[272]                     | 2 | 525.3153  | 1.647 | 0.042 |
| 149 | IPI00844156 | 1 | 56.4 | 0.77 | 0.04 | 24 | 48 | SERPINC1 SERPINC1 protein | n[145]IPEATNR                         | 2 | 472.7677  | 1.449 | 0.001 |
| 149 | IPI00844156 | 1 | 56.4 | 0.77 | 0.04 | 24 | 48 | SERPINC1 SERPINC1 protein | n[145]TSDQIHFFF                       | 2 | 643.3203  | 2.113 | 0.38  |
| 149 | IPI00844156 | 1 | 56.4 | 0.77 | 0.04 | 24 | 48 | SERPINC1 SERPINC1 protein | n[145]TSDQIHFFFA                      | 2 | 678.8389  | 2.73  | 0.412 |
| 149 | IPI00844156 | 1 | 56.4 | 0.77 | 0.04 | 24 | 48 | SERPINC1 SERPINC1 protein | KATEDEGSEQK                           | 2 | 821.4258  | 1.385 | 0.211 |
| 149 | IPI00844156 | 1 | 56.4 | 0.77 | 0.04 | 24 | 48 | SERPINC1 SERPINC1 protein | n[145]YQHLADSK[272]                   | 2 | 625.3426  | 2.422 | 0.254 |
| 149 | IPI00844156 | 1 | 56.4 | 0.77 | 0.04 | 24 | 48 | SERPINC1 SERPINC1 protein | n[145]EVPLNTIIFMGR                    | 3 | 511.9575  | 1.933 | 0.035 |
| 149 | IPI00844156 | 1 | 56.4 | 0.77 | 0.04 | 24 | 48 | SERPINC1 SERPINC1 protein | n[145]YQHLADSK[272]                   | 3 | 417.2308  | 2.906 | 0.067 |
| 149 | IPI00844156 | 1 | 56.4 | 0.77 | 0.04 | 24 | 48 | SERPINC1 SERPINC1 protein | ATTFYQHLADSK                          | 3 | 554.6264  | 2.574 | 0.145 |
| 149 | IPI00844156 | 1 | 56.4 | 0.77 | 0.04 | 24 | 48 | SERPINC1 SERPINC1 protein | n[145]ANRPFLVF                        | 2 | 554.3252  | 2.016 | 0.199 |
| 149 | IPI00844156 | 1 | 56.4 | 0.77 | 0.04 | 24 | 48 | SERPINC1 SERPINC1 protein | n[145]LYVSDAFHK[272]                  | 3 | 456.5902  | 2.185 | 0.148 |
| 149 | IPI00844156 | 1 | 56.4 | 0.77 | 0.04 | 24 | 48 | SERPINC1 SERPINC1 protein | YQHLADSK                              | 2 | 621.3355  | 1.942 | 0.138 |
| 149 | IPI00844156 | 1 | 56.4 | 0.77 | 0.04 | 24 | 48 | SERPINC1 SERPINC1 protein | n[145]ATTFYQHLADSK[272]               | 3 | 557.2978  | 2.985 | 0.043 |
| 149 | IPI00844156 | 1 | 56.4 | 0.77 | 0.04 | 24 | 48 | SERPINC1 SERPINC1 protein | NDNDNIFLSPLSISTAFAM[147]TK            | 3 | 865.7756  | 1.6   | 0.062 |
| 150 | IPI00871139 | 1 | 8    | 0.68 | 0.06 | 7  | 7  | MASP1 92 kDa protein      | n[145]APEPISTQSHSVLILFHSDNSGENR       | 4 | 720.6156  | 2.845 | 0.208 |
| 150 | IPI00871139 | 1 | 8    | 0.68 | 0.06 | 7  | 7  | MASP1 92 kDa protein      | n[145]AYAPLK[272]K[272]               | 3 | 408.2677  | 2.161 | 0.223 |



|     |             |   |      |      |      |     |    |                      |                                              |   |           |       |       |
|-----|-------------|---|------|------|------|-----|----|----------------------|----------------------------------------------|---|-----------|-------|-------|
| 150 | IPI00871139 | 1 | 8    | 0.68 | 0.06 | 7   | 7  | MASP1 92 kDa protein | n[145]VETEDQVLATFCGR                         | 2 | 879.4196  | 3.852 | 0.335 |
| 150 | IPI00871139 | 1 | 8    | 0.68 | 0.06 | 7   | 7  | MASP1 92 kDa protein | n[145]AYAPLK[272]K[272]                      | 2 | 611.8979  | 2.093 | 0.181 |
| 150 | IPI00871139 | 1 | 8    | 0.68 | 0.06 | 7   | 7  | MASP1 92 kDa protein | n[145]SDFSNEER                               | 2 | 564.2579  | 2.197 | 0.145 |
| 150 | IPI00871139 | 1 | 8    | 0.68 | 0.06 | 7   | 7  | MASP1 92 kDa protein | n[145]SDENEQHLGVK[272]                       | 3 | 515.27    | 2.488 | 0.212 |
| 150 | IPI00871139 | 1 | 8    | 0.68 | 0.06 | 7   | 7  | MASP1 92 kDa protein | AYAPLKK                                      | 2 | 605.8872  | 1.642 | 0.182 |
| 150 | IPI00871139 | 1 | 8    | 0.68 | 0.06 | 7   | 7  | MASP1 92 kDa protein | AYAPLKK                                      | 3 | 404.2606  | 1.388 | 0     |
| 151 | IPI00877703 | 1 | 62.2 | N_A  | N_A  | N_A | 99 | FGG 52 kDa protein   | n[145]DNCCILDER                              | 1 | 1316.5224 | 2.197 | 0.387 |
| 151 | IPI00877703 | 1 | 62.2 | N_A  | N_A  | N_A | 99 | FGG 52 kDa protein   | AIQLTYNPDESSKPNMIDAATLK                      | 2 | 1470.7787 | 5.094 | 0.532 |
| 151 | IPI00877703 | 1 | 62.2 | N_A  | N_A  | N_A | 99 | FGG 52 kDa protein   | DTVQIHIDITGK                                 | 2 | 753.9174  | 2.746 | 0.228 |
| 151 | IPI00877703 | 1 | 62.2 | N_A  | N_A  | N_A | 99 | FGG 52 kDa protein   | EGFGHLSPTGTTEFWLGNEK                         | 2 | 1244.1188 | 6.265 | 0.484 |
| 151 | IPI00877703 | 1 | 62.2 | N_A  | N_A  | N_A | 99 | FGG 52 kDa protein   | EGFGHLSPTGTTEFWLGNEK[272]                    | 2 | 1246.1224 | 4.795 | 0.417 |
| 151 | IPI00877703 | 1 | 62.2 | N_A  | N_A  | N_A | 99 | FGG 52 kDa protein   | GIADFLSTYQTK                                 | 2 | 812.4407  | 3.051 | 0.398 |
| 151 | IPI00877703 | 1 | 62.2 | N_A  | N_A  | N_A | 99 | FGG 52 kDa protein   | LTIGEGQQHHLGGAK                              | 2 | 913.5052  | 6.014 | 0.506 |
| 151 | IPI00877703 | 1 | 62.2 | N_A  | N_A  | N_A | 99 | FGG 52 kDa protein   | QSGLYFIKPLK                                  | 2 | 857.5244  | 1.858 | 0.052 |
| 151 | IPI00877703 | 1 | 62.2 | N_A  | N_A  | N_A | 99 | FGG 52 kDa protein   | TSTADYAMFK                                   | 2 | 707.8554  | 4.457 | 0.417 |
| 151 | IPI00877703 | 1 | 62.2 | N_A  | N_A  | N_A | 99 | FGG 52 kDa protein   | TSTADYAM[147]FK                              | 2 | 715.8529  | 3.863 | 0.469 |
| 151 | IPI00877703 | 1 | 62.2 | N_A  | N_A  | N_A | 99 | FGG 52 kDa protein   | YLQEIYNSNNQK                                 | 2 | 897.4627  | 4.713 | 0.457 |
| 151 | IPI00877703 | 1 | 62.2 | N_A  | N_A  | N_A | 99 | FGG 52 kDa protein   | n[145]AIQLTYNPDESSK[272]PN                   | 2 | 983.012   | 4.094 | 0.355 |
| 151 | IPI00877703 | 1 | 62.2 | N_A  | N_A  | N_A | 99 | FGG 52 kDa protein   | n[145]AIQLTYNPDESSK[272]PNMIDAATLK[272]      | 2 | 1476.7893 | 4.506 | 0.499 |
| 151 | IPI00877703 | 1 | 62.2 | N_A  | N_A  | N_A | 99 | FGG 52 kDa protein   | n[145]DTVQIHIDITGK[272]                      | 2 | 757.9245  | 2.184 | 0.264 |
| 151 | IPI00877703 | 1 | 62.2 | N_A  | N_A  | N_A | 99 | FGG 52 kDa protein   | n[145]EGFGHLSPTGTTEF                         | 2 | 812.3922  | 4.052 | 0.387 |
| 151 | IPI00877703 | 1 | 62.2 | N_A  | N_A  | N_A | 99 | FGG 52 kDa protein   | n[145]EGFGHLSPTGTTEFWLGNEK[272]              | 2 | 1248.1259 | 5.966 | 0.53  |
| 151 | IPI00877703 | 1 | 62.2 | N_A  | N_A  | N_A | 99 | FGG 52 kDa protein   | n[145]GIADFLSTYQTK[272]                      | 2 | 816.4478  | 4.5   | 0.481 |
| 151 | IPI00877703 | 1 | 62.2 | N_A  | N_A  | N_A | 99 | FGG 52 kDa protein   | n[145]LTIGEGQQHHLGGAK[272]                   | 2 | 917.5123  | 5.644 | 0.542 |
| 151 | IPI00877703 | 1 | 62.2 | N_A  | N_A  | N_A | 99 | FGG 52 kDa protein   | n[145]QSGLYFIK[272]PLK[272]                  | 2 | 863.5351  | 4.383 | 0.491 |
| 151 | IPI00877703 | 1 | 62.2 | N_A  | N_A  | N_A | 99 | FGG 52 kDa protein   | n[145]TCGIADFLSTYQTK[272]                    | 2 | 941.4701  | 4.266 | 0.52  |
| 151 | IPI00877703 | 1 | 62.2 | N_A  | N_A  | N_A | 99 | FGG 52 kDa protein   | n[145]TSTADYAMFK[272]                        | 2 | 711.8625  | 4.331 | 0.491 |
| 151 | IPI00877703 | 1 | 62.2 | N_A  | N_A  | N_A | 99 | FGG 52 kDa protein   | n[145]TSTADYAM[147]FK[272]                   | 2 | 719.86    | 3.398 | 0.494 |
| 151 | IPI00877703 | 1 | 62.2 | N_A  | N_A  | N_A | 99 | FGG 52 kDa protein   | n[145]TVQIHIDITGK[272]                       | 2 | 700.411   | 4.305 | 0.445 |
| 151 | IPI00877703 | 1 | 62.2 | N_A  | N_A  | N_A | 99 | FGG 52 kDa protein   | n[145]VAQLEAQCQEPCK[272]                     | 2 | 913.9292  | 3.131 | 0.474 |
| 151 | IPI00877703 | 1 | 62.2 | N_A  | N_A  | N_A | 99 | FGG 52 kDa protein   | n[145]YEASILTHDSSIR                          | 2 | 818.4266  | 2.532 | 0.345 |
| 151 | IPI00877703 | 1 | 62.2 | N_A  | N_A  | N_A | 99 | FGG 52 kDa protein   | n[145]YLQEIYNSNNQK[272]                      | 2 | 901.4698  | 4.827 | 0.399 |
| 151 | IPI00877703 | 1 | 62.2 | N_A  | N_A  | N_A | 99 | FGG 52 kDa protein   | AIQLTYNPDESSKPNMIDAATLK                      | 3 | 980.8549  | 5.053 | 0.466 |
| 151 | IPI00877703 | 1 | 62.2 | N_A  | N_A  | N_A | 99 | FGG 52 kDa protein   | AIQLTYNPDESSKPNM[147]IDAATLK                 | 3 | 986.1865  | 4.989 | 0.469 |
| 151 | IPI00877703 | 1 | 62.2 | N_A  | N_A  | N_A | 99 | FGG 52 kDa protein   | CHAGHLNGVYYQGGTYSK                           | 3 | 761.0262  | 6.364 | 0.582 |
| 151 | IPI00877703 | 1 | 62.2 | N_A  | N_A  | N_A | 99 | FGG 52 kDa protein   | DTVQIHIDITGK                                 | 3 | 502.9474  | 3.135 | 0.345 |
| 151 | IPI00877703 | 1 | 62.2 | N_A  | N_A  | N_A | 99 | FGG 52 kDa protein   | EGFGHLSPTGTTEFWLGNEK                         | 3 | 829.7483  | 4.738 | 0.529 |
| 151 | IPI00877703 | 1 | 62.2 | N_A  | N_A  | N_A | 99 | FGG 52 kDa protein   | FAGGDAGDAFDGDFGDDPSDK                        | 3 | 835.0277  | 4.955 | 0.548 |
| 151 | IPI00877703 | 1 | 62.2 | N_A  | N_A  | N_A | 99 | FGG 52 kDa protein   | KMLEEIMKYEASILTHDSSIR                        | 3 | 972.1892  | 4.613 | 0.483 |
| 151 | IPI00877703 | 1 | 62.2 | N_A  | N_A  | N_A | 99 | FGG 52 kDa protein   | LTIGEGQQHHLGGAK                              | 3 | 609.3392  | 2.59  | 0.105 |
| 151 | IPI00877703 | 1 | 62.2 | N_A  | N_A  | N_A | 99 | FGG 52 kDa protein   | VAQLEAQCQEPCKDTVQIHIDITGK                    | 3 | 1056.1887 | 5.282 | 0.512 |
| 151 | IPI00877703 | 1 | 62.2 | N_A  | N_A  | N_A | 99 | FGG 52 kDa protein   | YLQEIYNSNNQK                                 | 3 | 598.6442  | 4.373 | 0.402 |
| 151 | IPI00877703 | 1 | 62.2 | N_A  | N_A  | N_A | 99 | FGG 52 kDa protein   | n[145]AIQLTYNPDESSK[272]PNMIDAATLK[272]      | 3 | 984.862   | 3.571 | 0.279 |
| 151 | IPI00877703 | 1 | 62.2 | N_A  | N_A  | N_A | 99 | FGG 52 kDa protein   | n[145]AIQLTYNPDESSK[272]PNM[147]IDAATLK[272] | 3 | 990.1936  | 4.764 | 0.525 |
| 151 | IPI00877703 | 1 | 62.2 | N_A  | N_A  | N_A | 99 | FGG 52 kDa protein   | n[145]CHAGHLNGVYYQGGTYSK[272]                | 3 | 763.6976  | 6.804 | 0.526 |
| 151 | IPI00877703 | 1 | 62.2 | N_A  | N_A  | N_A | 99 | FGG 52 kDa protein   | n[145]DTVQIHIDITGK[272]                      | 3 | 505.6188  | 2.543 | 0.318 |
| 151 | IPI00877703 | 1 | 62.2 | N_A  | N_A  | N_A | 99 | FGG 52 kDa protein   | n[145]FAGGDAGDAFDGDFGDDPSDK[272]             | 3 | 837.6991  | 5.273 | 0.599 |
| 151 | IPI00877703 | 1 | 62.2 | N_A  | N_A  | N_A | 99 | FGG 52 kDa protein   | n[145]IHLISTQSAIPYALR                        | 3 | 609.6918  | 3.428 | 0.234 |

|     |             |   |      |     |     |     |    |                    |                                              |   |           |       |       |
|-----|-------------|---|------|-----|-----|-----|----|--------------------|----------------------------------------------|---|-----------|-------|-------|
| 151 | IPI00877703 | 1 | 62.2 | N_A | N_A | N_A | 99 | FGG 52 kDa protein | n[145]LTIGEGQQHHLG                           | 3 | 478.5921  | 4.393 | 0.484 |
| 151 | IPI00877703 | 1 | 62.2 | N_A | N_A | N_A | 99 | FGG 52 kDa protein | n[145]LTIGEGQQHHLGGAK[272]                   | 3 | 612.0106  | 3.661 | 0.316 |
| 151 | IPI00877703 | 1 | 62.2 | N_A | N_A | N_A | 99 | FGG 52 kDa protein | n[145]QSGLYFIK[272]PLK[272]                  | 3 | 576.0258  | 3.663 | 0.352 |
| 151 | IPI00877703 | 1 | 62.2 | N_A | N_A | N_A | 99 | FGG 52 kDa protein | n[145]VAQLEAQCQEPCK[272]DTVQIHDTGK[272]      | 3 | 1060.1958 | 6.647 | 0.576 |
| 151 | IPI00877703 | 1 | 62.2 | N_A | N_A | N_A | 99 | FGG 52 kDa protein | n[145]YEASILTHDSSIR                          | 3 | 545.9535  | 1.619 | 0.018 |
| 151 | IPI00877703 | 1 | 62.2 | N_A | N_A | N_A | 99 | FGG 52 kDa protein | KMLEEIMKYEASILTHDSSIR                        | 4 | 729.3937  | 5.105 | 0.517 |
| 151 | IPI00877703 | 1 | 62.2 | N_A | N_A | N_A | 99 | FGG 52 kDa protein | LTIGEGQQHHLGGAK                              | 4 | 457.2563  | 3.972 | 0.446 |
| 151 | IPI00877703 | 1 | 62.2 | N_A | N_A | N_A | 99 | FGG 52 kDa protein | QSGLYFIKPLK                                  | 4 | 429.2659  | 1.97  | 0.306 |
| 151 | IPI00877703 | 1 | 62.2 | N_A | N_A | N_A | 99 | FGG 52 kDa protein | VAQLEAQCQEPCKDTVQIHDTGK                      | 4 | 792.3934  | 4.279 | 0.383 |
| 151 | IPI00877703 | 1 | 62.2 | N_A | N_A | N_A | 99 | FGG 52 kDa protein | n[145]LTIGEGQQHHLGGAK[272]                   | 4 | 459.2598  | 2.972 | 0.326 |
| 151 | IPI00877703 | 1 | 62.2 | N_A | N_A | N_A | 99 | FGG 52 kDa protein | n[145]QSGLYFIK[272]PLK[272]                  | 4 | 432.2712  | 2.567 | 0.337 |
| 151 | IPI00877703 | 1 | 62.2 | N_A | N_A | N_A | 99 | FGG 52 kDa protein | n[145]VAQLEAQCQEPCK[272]DTVQIHDTGK[272]      | 4 | 795.3987  | 5.295 | 0.4   |
| 151 | IPI00877703 | 1 | 62.2 | N_A | N_A | N_A | 99 | FGG 52 kDa protein | KMLEEIMKYEASILTHDSSIR                        | 5 | 583.7164  | 4.728 | 0.502 |
| 151 | IPI00877703 | 1 | 62.2 | N_A | N_A | N_A | 99 | FGG 52 kDa protein | QSGLYFIKPLK                                  | 3 | 572.0187  | 2.77  | 0.129 |
| 151 | IPI00877703 | 1 | 62.2 | N_A | N_A | N_A | 99 | FGG 52 kDa protein | RLDGSVDFK                                    | 3 | 439.5822  | 4.1   | 0.236 |
| 151 | IPI00877703 | 1 | 62.2 | N_A | N_A | N_A | 99 | FGG 52 kDa protein | VGPEADKYR                                    | 3 | 438.9104  | 3.208 | 0.4   |
| 151 | IPI00877703 | 1 | 62.2 | N_A | N_A | N_A | 99 | FGG 52 kDa protein | n[145]YLQEIYNSNNQK[272]                      | 3 | 601.3156  | 3.845 | 0.254 |
| 151 | IPI00877703 | 1 | 62.2 | N_A | N_A | N_A | 99 | FGG 52 kDa protein | n[145]AIQLTYNPDESSK[272]PNM[147]IDAATLK[272] | 4 | 742.897   | 3.57  | 0.303 |
| 151 | IPI00877703 | 1 | 62.2 | N_A | N_A | N_A | 99 | FGG 52 kDa protein | n[145]RLDGSVDFK[272]K[272]                   | 4 | 399.9913  | 1.638 | 0.129 |
| 151 | IPI00877703 | 1 | 62.2 | N_A | N_A | N_A | 99 | FGG 52 kDa protein | LDGSVDFK                                     | 2 | 714.9142  | 2.941 | 0.408 |
| 151 | IPI00877703 | 1 | 62.2 | N_A | N_A | N_A | 99 | FGG 52 kDa protein | YEASILTHDSSIR                                | 2 | 816.423   | 3.879 | 0.4   |
| 151 | IPI00877703 | 1 | 62.2 | N_A | N_A | N_A | 99 | FGG 52 kDa protein | n[145]IHLISTQSAIPYALR                        | 2 | 914.0341  | 1.996 | 0.145 |
| 151 | IPI00877703 | 1 | 62.2 | N_A | N_A | N_A | 99 | FGG 52 kDa protein | KM[147]LEEIMK                                | 3 | 486.6122  | 1.855 | 0.026 |
| 151 | IPI00877703 | 1 | 62.2 | N_A | N_A | N_A | 99 | FGG 52 kDa protein | n[145]RLDGSVDFK[272]                         | 3 | 442.2536  | 2.947 | 0.247 |
| 151 | IPI00877703 | 1 | 62.2 | N_A | N_A | N_A | 99 | FGG 52 kDa protein | VAQLEAQCQEPCK                                | 2 | 909.9221  | 2.805 | 0.445 |
| 151 | IPI00877703 | 1 | 62.2 | N_A | N_A | N_A | 99 | FGG 52 kDa protein | n[145]DNCCILDER                              | 2 | 658.7648  | 2.981 | 0.348 |
| 151 | IPI00877703 | 1 | 62.2 | N_A | N_A | N_A | 99 | FGG 52 kDa protein | n[145]RLDGSVDFK[272]K[272]                   | 2 | 798.9754  | 3.28  | 0.353 |
| 151 | IPI00877703 | 1 | 62.2 | N_A | N_A | N_A | 99 | FGG 52 kDa protein | EGFGHLSPTGTTEFWLGNEK[272]                    | 3 | 831.084   | 4.4   | 0.389 |
| 151 | IPI00877703 | 1 | 62.2 | N_A | N_A | N_A | 99 | FGG 52 kDa protein | AIQLTYNPDESSKPNMIDAATLK                      | 4 | 735.893   | 3.439 | 0.235 |
| 151 | IPI00877703 | 1 | 62.2 | N_A | N_A | N_A | 99 | FGG 52 kDa protein | KM[147]LEEIM[147]KYEASILTHDSSIR              | 4 | 737.3912  | 3.365 | 0.256 |
| 151 | IPI00877703 | 1 | 62.2 | N_A | N_A | N_A | 99 | FGG 52 kDa protein | IHLISTQSAIPYALR                              | 3 | 608.3561  | 2.856 | 0.191 |
| 151 | IPI00877703 | 1 | 62.2 | N_A | N_A | N_A | 99 | FGG 52 kDa protein | n[145]LDGSVDFK[272]                          | 1 | 1168.6453 | 2.342 | 0.262 |
| 151 | IPI00877703 | 1 | 62.2 | N_A | N_A | N_A | 99 | FGG 52 kDa protein | RLDGSVDFK                                    | 2 | 792.9647  | 3.362 | 0.24  |
| 151 | IPI00877703 | 1 | 62.2 | N_A | N_A | N_A | 99 | FGG 52 kDa protein | VELEDWNGR                                    | 2 | 629.3148  | 2.308 | 0.088 |
| 151 | IPI00877703 | 1 | 62.2 | N_A | N_A | N_A | 99 | FGG 52 kDa protein | YEASILTHDSSIR                                | 3 | 544.6178  | 2.921 | 0.077 |
| 151 | IPI00877703 | 1 | 62.2 | N_A | N_A | N_A | 99 | FGG 52 kDa protein | n[145]EGFGHLSPTGTTEFWLGNEK[272]              | 3 | 832.4197  | 3.443 | 0.259 |
| 151 | IPI00877703 | 1 | 62.2 | N_A | N_A | N_A | 99 | FGG 52 kDa protein | n[145]VGPEADK[272]YR                         | 3 | 441.5818  | 2.251 | 0.103 |
| 151 | IPI00877703 | 1 | 62.2 | N_A | N_A | N_A | 99 | FGG 52 kDa protein | VELEDWNGR                                    | 1 | 1257.6223 | 2.928 | 0.147 |
| 151 | IPI00877703 | 1 | 62.2 | N_A | N_A | N_A | 99 | FGG 52 kDa protein | n[145]VELEDWNGR                              | 1 | 1261.6294 | 2.673 | 0.18  |
| 151 | IPI00877703 | 1 | 62.2 | N_A | N_A | N_A | 99 | FGG 52 kDa protein | n[145]VELEDWNGR                              | 2 | 631.3183  | 3.031 | 0.313 |
| 151 | IPI00877703 | 1 | 62.2 | N_A | N_A | N_A | 99 | FGG 52 kDa protein | LDGSVDFK                                     | 1 | 1160.6311 | 2.327 | 0.233 |
| 151 | IPI00877703 | 1 | 62.2 | N_A | N_A | N_A | 99 | FGG 52 kDa protein | LTIGEGQQHHLG                                 | 3 | 477.2564  | 3.871 | 0.321 |
| 151 | IPI00877703 | 1 | 62.2 | N_A | N_A | N_A | 99 | FGG 52 kDa protein | n[145]LTIGEGQQHHLGGA                         | 3 | 521.2783  | 3.566 | 0.346 |
| 151 | IPI00877703 | 1 | 62.2 | N_A | N_A | N_A | 99 | FGG 52 kDa protein | n[145]LDGSVDFK[272]                          | 2 | 584.8263  | 2.144 | 0.151 |
| 151 | IPI00877703 | 1 | 62.2 | N_A | N_A | N_A | 99 | FGG 52 kDa protein | n[145]VGPEADK[272]                           | 2 | 502.2868  | 2.179 | 0.28  |
| 151 | IPI00877703 | 1 | 62.2 | N_A | N_A | N_A | 99 | FGG 52 kDa protein | n[145]TVQIHDTGK[272]                         | 3 | 467.2764  | 2.782 | 0.376 |
| 151 | IPI00877703 | 1 | 62.2 | N_A | N_A | N_A | 99 | FGG 52 kDa protein | LDGSVDFK                                     | 2 | 580.8192  | 1.873 | 0.032 |
| 151 | IPI00877703 | 1 | 62.2 | N_A | N_A | N_A | 99 | FGG 52 kDa protein | n[145]LTIGEGQQHHL                            | 3 | 459.5849  | 3.542 | 0.315 |

|     |             |   |      |     |     |     |    |                    |                                              |   |           |       |       |
|-----|-------------|---|------|-----|-----|-----|----|--------------------|----------------------------------------------|---|-----------|-------|-------|
| 151 | IPI00877703 | 1 | 62.2 | N_A | N_A | N_A | 99 | FGG 52 kDa protein | n[145]MLEEIMK[272]                           | 2 | 591.3293  | 2.962 | 0.134 |
| 151 | IPI00877703 | 1 | 62.2 | N_A | N_A | N_A | 99 | FGG 52 kDa protein | RLDGSVDFK                                    | 2 | 658.8697  | 2.103 | 0.095 |
| 151 | IPI00877703 | 1 | 62.2 | N_A | N_A | N_A | 99 | FGG 52 kDa protein | VGPEADKYR                                    | 2 | 657.8619  | 2.808 | 0.375 |
| 151 | IPI00877703 | 1 | 62.2 | N_A | N_A | N_A | 99 | FGG 52 kDa protein | n[145]VGPEADK[272]YR                         | 1 | 1322.7308 | 2.449 | 0.2   |
| 151 | IPI00877703 | 1 | 62.2 | N_A | N_A | N_A | 99 | FGG 52 kDa protein | KMLEEIMK                                     | 2 | 721.4172  | 2.78  | 0.129 |
| 151 | IPI00877703 | 1 | 62.2 | N_A | N_A | N_A | 99 | FGG 52 kDa protein | n[145]RLDGSVDFK[272]                         | 2 | 662.8768  | 2.291 | 0.16  |
| 151 | IPI00877703 | 1 | 62.2 | N_A | N_A | N_A | 99 | FGG 52 kDa protein | n[145]VGPEADK[272]YR                         | 2 | 661.869   | 2.769 | 0.276 |
| 151 | IPI00877703 | 1 | 62.2 | N_A | N_A | N_A | 99 | FGG 52 kDa protein | n[145]RLDGSVDFK[272]K[272]                   | 3 | 532.986   | 1.735 | 0.026 |
| 151 | IPI00877703 | 1 | 62.2 | N_A | N_A | N_A | 99 | FGG 52 kDa protein | KM[147]LEEIM[147]K                           | 2 | 737.4121  | 2.285 | 0.204 |
| 151 | IPI00877703 | 1 | 62.2 | N_A | N_A | N_A | 99 | FGG 52 kDa protein | VGPEADK                                      | 2 | 498.2797  | 2.189 | 0.169 |
| 151 | IPI00877703 | 1 | 62.2 | N_A | N_A | N_A | 99 | FGG 52 kDa protein | n[145]SSK[272]PNM[147]IDAATLK[272]           | 3 | 608.6802  | 2.767 | 0.347 |
| 151 | IPI00877703 | 1 | 62.2 | N_A | N_A | N_A | 99 | FGG 52 kDa protein | n[145]AIQLTYNPDESSK[272]PNM[147]IDAATLK[272] | 2 | 1484.7868 | 3.126 | 0.486 |
| 151 | IPI00877703 | 1 | 62.2 | N_A | N_A | N_A | 99 | FGG 52 kDa protein | RLDGSVDFKK                                   | 4 | 396.986   | 2.457 | 0.278 |
| 151 | IPI00877703 | 1 | 62.2 | N_A | N_A | N_A | 99 | FGG 52 kDa protein | MLEEIMK                                      | 2 | 587.3222  | 2.417 | 0.101 |
| 151 | IPI00877703 | 1 | 62.2 | N_A | N_A | N_A | 99 | FGG 52 kDa protein | M[147]LEEIM[147]K                            | 2 | 603.3171  | 2.223 | 0.107 |
| 151 | IPI00877703 | 1 | 62.2 | N_A | N_A | N_A | 99 | FGG 52 kDa protein | n[145]LTIGEGQQHH                             | 3 | 421.8903  | 2.967 | 0.282 |
| 151 | IPI00877703 | 1 | 62.2 | N_A | N_A | N_A | 99 | FGG 52 kDa protein | n[145]TIGEGQQHHLGGAK[272]                    | 3 | 574.316   | 3.612 | 0.27  |
| 151 | IPI00877703 | 1 | 62.2 | N_A | N_A | N_A | 99 | FGG 52 kDa protein | LDGSVDFKK                                    | 3 | 476.9452  | 1.837 | 0.188 |
| 151 | IPI00877703 | 1 | 62.2 | N_A | N_A | N_A | 99 | FGG 52 kDa protein | n[145]MLEEIM[147]K[272]                      | 1 | 1197.6462 | 1.765 | 0.072 |
| 151 | IPI00877703 | 1 | 62.2 | N_A | N_A | N_A | 99 | FGG 52 kDa protein | IVNLKEK                                      | 2 | 632.4111  | 2.819 | 0.118 |
| 151 | IPI00877703 | 1 | 62.2 | N_A | N_A | N_A | 99 | FGG 52 kDa protein | MLEEIM[147]K                                 | 1 | 1189.632  | 1.934 | 0.082 |
| 151 | IPI00877703 | 1 | 62.2 | N_A | N_A | N_A | 99 | FGG 52 kDa protein | n[145]MLEEIM[147]K[272]YEASILTHDSSIR         | 4 | 668.3485  | 2.549 | 0.25  |
| 151 | IPI00877703 | 1 | 62.2 | N_A | N_A | N_A | 99 | FGG 52 kDa protein | n[145]LDGSVDFK[272]K[272]                    | 2 | 720.9248  | 2.054 | 0.087 |
| 151 | IPI00877703 | 1 | 62.2 | N_A | N_A | N_A | 99 | FGG 52 kDa protein | n[145]LDGSVDFK[272]K[272]                    | 3 | 480.9523  | 1.955 | 0.135 |
| 151 | IPI00877703 | 1 | 62.2 | N_A | N_A | N_A | 99 | FGG 52 kDa protein | MLEEIM[147]K                                 | 2 | 595.3196  | 2.315 | 0.031 |
| 151 | IPI00877703 | 1 | 62.2 | N_A | N_A | N_A | 99 | FGG 52 kDa protein | n[145]TSTADYAM[147]FK[272]                   | 3 | 480.2424  | 1.865 | 0.191 |
| 151 | IPI00877703 | 1 | 62.2 | N_A | N_A | N_A | 99 | FGG 52 kDa protein | LTIGEGQQHHLGG                                | 3 | 496.2636  | 3.146 | 0.254 |
| 151 | IPI00877703 | 1 | 62.2 | N_A | N_A | N_A | 99 | FGG 52 kDa protein | n[145]LISTQSAIPYALR                          | 2 | 788.9626  | 4.069 | 0.373 |
| 151 | IPI00877703 | 1 | 62.2 | N_A | N_A | N_A | 99 | FGG 52 kDa protein | TVQIHDTGK                                    | 2 | 696.4039  | 3.838 | 0.335 |
| 151 | IPI00877703 | 1 | 62.2 | N_A | N_A | N_A | 99 | FGG 52 kDa protein | TSTADYAM[147]FK                              | 3 | 477.571   | 2.856 | 0.018 |
| 151 | IPI00877703 | 1 | 62.2 | N_A | N_A | N_A | 99 | FGG 52 kDa protein | n[145]GIADFLSTYQTK[272]                      | 3 | 544.6343  | 2.582 | 0.283 |
| 151 | IPI00877703 | 1 | 62.2 | N_A | N_A | N_A | 99 | FGG 52 kDa protein | n[145]DCQDIANK[272]                          | 2 | 620.7989  | 2.82  | 0.28  |
| 151 | IPI00877703 | 1 | 62.2 | N_A | N_A | N_A | 99 | FGG 52 kDa protein | LYFIKPLK                                     | 2 | 721.4684  | 3.112 | 0.352 |
| 151 | IPI00877703 | 1 | 62.2 | N_A | N_A | N_A | 99 | FGG 52 kDa protein | n[145]LTIGEGQQHHLGG                          | 2 | 745.8953  | 3.614 | 0.358 |
| 151 | IPI00877703 | 1 | 62.2 | N_A | N_A | N_A | 99 | FGG 52 kDa protein | LTIGEGQQHHLG                                 | 2 | 715.381   | 3.461 | 0.335 |
| 151 | IPI00877703 | 1 | 62.2 | N_A | N_A | N_A | 99 | FGG 52 kDa protein | DCQDIANK                                     | 2 | 616.7918  | 2.496 | 0.194 |
| 151 | IPI00877703 | 1 | 62.2 | N_A | N_A | N_A | 99 | FGG 52 kDa protein | n[145]IVNLK[272]EK[272]                      | 2 | 638.4217  | 2.263 | 0.11  |
| 151 | IPI00877703 | 1 | 62.2 | N_A | N_A | N_A | 99 | FGG 52 kDa protein | n[145]LTIGEGQQHHLG                           | 2 | 717.3845  | 3.463 | 0.384 |
| 151 | IPI00877703 | 1 | 62.2 | N_A | N_A | N_A | 99 | FGG 52 kDa protein | GLYFIKPLK                                    | 2 | 749.9791  | 2.89  | 0.437 |
| 151 | IPI00877703 | 1 | 62.2 | N_A | N_A | N_A | 99 | FGG 52 kDa protein | n[145]QSGLYFIK[272]                          | 2 | 622.3681  | 2.709 | 0.342 |
| 151 | IPI00877703 | 1 | 62.2 | N_A | N_A | N_A | 99 | FGG 52 kDa protein | n[145]SGLYFIK[272]PLK[272]                   | 3 | 533.3396  | 3.119 | 0.258 |
| 151 | IPI00877703 | 1 | 62.2 | N_A | N_A | N_A | 99 | FGG 52 kDa protein | AIQLTYNPDESSKPN                              | 2 | 979.0049  | 4.288 | 0.405 |
| 151 | IPI00877703 | 1 | 62.2 | N_A | N_A | N_A | 99 | FGG 52 kDa protein | FFTSHNGM[147]QF                              | 2 | 686.3112  | 2.747 | 0.326 |
| 151 | IPI00877703 | 1 | 62.2 | N_A | N_A | N_A | 99 | FGG 52 kDa protein | SGLYFIKPLK                                   | 2 | 793.4951  | 3.781 | 0.265 |
| 151 | IPI00877703 | 1 | 62.2 | N_A | N_A | N_A | 99 | FGG 52 kDa protein | QSGLYFIK                                     | 2 | 618.361   | 2.567 | 0.286 |
| 151 | IPI00877703 | 1 | 62.2 | N_A | N_A | N_A | 99 | FGG 52 kDa protein | n[145]GLYFIK[272]PLK[272]                    | 2 | 755.9898  | 3.012 | 0.296 |
| 151 | IPI00877703 | 1 | 62.2 | N_A | N_A | N_A | 99 | FGG 52 kDa protein | n[145]LYFIK[272]PLK[272]                     | 2 | 727.479   | 3.091 | 0.256 |
| 151 | IPI00877703 | 1 | 62.2 | N_A | N_A | N_A | 99 | FGG 52 kDa protein | n[145]DTVQIHDTG                              | 2 | 621.826   | 2.288 | 0.391 |

|     |             |   |      |     |     |     |    |                    |                                 |   |           |       |       |
|-----|-------------|---|------|-----|-----|-----|----|--------------------|---------------------------------|---|-----------|-------|-------|
| 151 | IPI00877703 | 1 | 62.2 | N_A | N_A | N_A | 99 | FGG 52 kDa protein | LYFIKPLK                        | 3 | 481.3147  | 1.885 | 0.271 |
| 151 | IPI00877703 | 1 | 62.2 | N_A | N_A | N_A | 99 | FGG 52 kDa protein | n[145]SGLYFIK[272]PLK[272]      | 2 | 799.5058  | 3.404 | 0.239 |
| 151 | IPI00877703 | 1 | 62.2 | N_A | N_A | N_A | 99 | FGG 52 kDa protein | DTVQIHDITG                      | 2 | 619.8224  | 2.759 | 0.286 |
| 151 | IPI00877703 | 1 | 62.2 | N_A | N_A | N_A | 99 | FGG 52 kDa protein | n[145]LTIGEGQQHHLGG             | 3 | 497.5993  | 2.822 | 0.184 |
| 151 | IPI00877703 | 1 | 62.2 | N_A | N_A | N_A | 99 | FGG 52 kDa protein | n[145]FFTSHNGM[147]QF           | 2 | 688.3147  | 2.877 | 0.265 |
| 151 | IPI00877703 | 1 | 62.2 | N_A | N_A | N_A | 99 | FGG 52 kDa protein | SGLYFIKPLK                      | 3 | 529.3325  | 2.977 | 0.136 |
| 151 | IPI00877703 | 1 | 62.2 | N_A | N_A | N_A | 99 | FGG 52 kDa protein | n[145]ISTQSAIPYALR              | 2 | 732.4206  | 3.391 | 0.321 |
| 151 | IPI00877703 | 1 | 62.2 | N_A | N_A | N_A | 99 | FGG 52 kDa protein | n[145]LTIGEGQQHHL               | 2 | 688.8738  | 2.869 | 0.216 |
| 151 | IPI00877703 | 1 | 62.2 | N_A | N_A | N_A | 99 | FGG 52 kDa protein | n[145]YEASILTHDSSIR             | 4 | 409.7169  | 1.687 | 0.015 |
| 151 | IPI00877703 | 1 | 62.2 | N_A | N_A | N_A | 99 | FGG 52 kDa protein | YEASILTHDS                      | 2 | 638.3144  | 1.862 | 0.352 |
| 151 | IPI00877703 | 1 | 62.2 | N_A | N_A | N_A | 99 | FGG 52 kDa protein | KM[147]LEEIMKYEASILTHDSSIR      | 4 | 733.3924  | 3.879 | 0.427 |
| 151 | IPI00877703 | 1 | 62.2 | N_A | N_A | N_A | 99 | FGG 52 kDa protein | n[145]IHLISTQ                   | 2 | 478.2883  | 2.054 | 0.266 |
| 151 | IPI00877703 | 1 | 62.2 | N_A | N_A | N_A | 99 | FGG 52 kDa protein | KMLEEIM[147]KYEASILTHDSSIR      | 4 | 733.3924  | 3.519 | 0.472 |
| 151 | IPI00877703 | 1 | 62.2 | N_A | N_A | N_A | 99 | FGG 52 kDa protein | n[145]FFTSHN                    | 2 | 448.7228  | 2.161 | 0.188 |
| 151 | IPI00877703 | 1 | 62.2 | N_A | N_A | N_A | 99 | FGG 52 kDa protein | n[145]QSGLYFIK[272]PL           | 2 | 727.4365  | 2.447 | 0.395 |
| 151 | IPI00877703 | 1 | 62.2 | N_A | N_A | N_A | 99 | FGG 52 kDa protein | n[145]EGFGHLSPTGTT              | 2 | 674.3367  | 2.533 | 0.223 |
| 151 | IPI00877703 | 1 | 62.2 | N_A | N_A | N_A | 99 | FGG 52 kDa protein | n[145]YEASILTHDS                | 2 | 640.318   | 2.22  | 0.234 |
| 151 | IPI00877703 | 1 | 62.2 | N_A | N_A | N_A | 99 | FGG 52 kDa protein | n[145]FFTSH                     | 2 | 391.7013  | 1.92  | 0.227 |
| 151 | IPI00877703 | 1 | 62.2 | N_A | N_A | N_A | 99 | FGG 52 kDa protein | KM[147]LEEIM[147]KYEASILTHDSSIR | 3 | 982.8525  | 2.812 | 0.121 |
| 151 | IPI00877703 | 1 | 62.2 | N_A | N_A | N_A | 99 | FGG 52 kDa protein | n[145]DCQDIANK[272]             | 1 | 1240.5905 | 2.453 | 0.308 |
| 151 | IPI00877703 | 1 | 62.2 | N_A | N_A | N_A | 99 | FGG 52 kDa protein | n[145]IHLISTQSAIPY              | 2 | 743.923   | 2.414 | 0.205 |
| 151 | IPI00877703 | 1 | 62.2 | N_A | N_A | N_A | 99 | FGG 52 kDa protein | DCQDIANK                        | 1 | 1232.5763 | 2.406 | 0.352 |
| 151 | IPI00877703 | 1 | 62.2 | N_A | N_A | N_A | 99 | FGG 52 kDa protein | KM[147]LEEIMKYEASILTHDSSIR      | 3 | 977.5208  | 3.306 | 0.46  |
| 151 | IPI00877703 | 1 | 62.2 | N_A | N_A | N_A | 99 | FGG 52 kDa protein | QSGLYFIKPL                      | 2 | 723.4294  | 1.875 | 0.23  |
| 151 | IPI00877703 | 1 | 62.2 | N_A | N_A | N_A | 99 | FGG 52 kDa protein | n[145]YFIK[272]PLK[272]         | 2 | 670.937   | 2.033 | 0.13  |
| 151 | IPI00877703 | 1 | 62.2 | N_A | N_A | N_A | 99 | FGG 52 kDa protein | YVATR                           | 2 | 375.2189  | 1.994 | 0.107 |
| 151 | IPI00877703 | 1 | 62.2 | N_A | N_A | N_A | 99 | FGG 52 kDa protein | GLYFIKPLK                       | 3 | 500.3218  | 2.139 | 0.144 |
| 151 | IPI00877703 | 1 | 62.2 | N_A | N_A | N_A | 99 | FGG 52 kDa protein | n[145]IHLISTQSAIPYALR           | 2 | 857.4921  | 2.743 | 0.248 |
| 151 | IPI00877703 | 1 | 62.2 | N_A | N_A | N_A | 99 | FGG 52 kDa protein | M[147]IDAATLK                   | 2 | 579.8312  | 2.801 | 0.147 |
| 151 | IPI00877703 | 1 | 62.2 | N_A | N_A | N_A | 99 | FGG 52 kDa protein | YFIKPLK                         | 2 | 664.9263  | 2.041 | 0.169 |
| 151 | IPI00877703 | 1 | 62.2 | N_A | N_A | N_A | 99 | FGG 52 kDa protein | n[145]SILTHDSSIR                | 3 | 424.9058  | 2.689 | 0.065 |
| 151 | IPI00877703 | 1 | 62.2 | N_A | N_A | N_A | 99 | FGG 52 kDa protein | FFTSHN                          | 2 | 446.7192  | 1.767 | 0.192 |
| 151 | IPI00877703 | 1 | 62.2 | N_A | N_A | N_A | 99 | FGG 52 kDa protein | n[145]IHLISTQSAIPYAL            | 2 | 835.9835  | 1.722 | 0.273 |
| 151 | IPI00877703 | 1 | 62.2 | N_A | N_A | N_A | 99 | FGG 52 kDa protein | IHLISTQSAIPY                    | 2 | 741.9194  | 2.17  | 0.169 |
| 151 | IPI00877703 | 1 | 62.2 | N_A | N_A | N_A | 99 | FGG 52 kDa protein | MIDAATLK                        | 2 | 571.8338  | 2.63  | 0.131 |
| 151 | IPI00877703 | 1 | 62.2 | N_A | N_A | N_A | 99 | FGG 52 kDa protein | FFTSH                           | 2 | 389.6978  | 1.74  | 0.137 |
| 151 | IPI00877703 | 1 | 62.2 | N_A | N_A | N_A | 99 | FGG 52 kDa protein | n[145]GLYFIK[272]PLK[272]       | 3 | 504.3289  | 2.159 | 0.114 |
| 151 | IPI00877703 | 1 | 62.2 | N_A | N_A | N_A | 99 | FGG 52 kDa protein | IHLISTQ                         | 2 | 476.2848  | 1.79  | 0.173 |
| 151 | IPI00877703 | 1 | 62.2 | N_A | N_A | N_A | 99 | FGG 52 kDa protein | n[145]FFTSH                     | 1 | 782.3954  | 1.633 | 0.216 |
| 151 | IPI00877703 | 1 | 62.2 | N_A | N_A | N_A | 99 | FGG 52 kDa protein | n[145]MIDAATLK[272]             | 2 | 575.8409  | 2.197 | 0.172 |
| 151 | IPI00877703 | 1 | 62.2 | N_A | N_A | N_A | 99 | FGG 52 kDa protein | TCGIADFLSTYQTK                  | 2 | 937.463   | 4.226 | 0.314 |
| 151 | IPI00877703 | 1 | 62.2 | N_A | N_A | N_A | 99 | FGG 52 kDa protein | SAIPYALR                        | 2 | 515.8059  | 2.267 | 0.008 |
| 151 | IPI00877703 | 1 | 62.2 | N_A | N_A | N_A | 99 | FGG 52 kDa protein | n[145]LYFIK[272]PLK[272]        | 3 | 485.3218  | 2.426 | 0.045 |
| 151 | IPI00877703 | 1 | 62.2 | N_A | N_A | N_A | 99 | FGG 52 kDa protein | n[145]YEASILTHD                 | 2 | 596.802   | 1.94  | 0.09  |
| 151 | IPI00877703 | 1 | 62.2 | N_A | N_A | N_A | 99 | FGG 52 kDa protein | LTIGEGQQH                       | 2 | 561.7988  | 1.874 | 0.079 |
| 151 | IPI00877703 | 1 | 62.2 | N_A | N_A | N_A | 99 | FGG 52 kDa protein | QSGLYF                          | 1 | 854.4407  | 1.393 | 0.317 |
| 151 | IPI00877703 | 1 | 62.2 | N_A | N_A | N_A | 99 | FGG 52 kDa protein | n[145]FIK[272]PLK[272]          | 3 | 393.2726  | 2.208 | 0.024 |
| 151 | IPI00877703 | 1 | 62.2 | N_A | N_A | N_A | 99 | FGG 52 kDa protein | IHLISTQSAIPYAL                  | 2 | 833.98    | 1.798 | 0.058 |

|     |             |   |      |      |      |     |    |                    |                                   |   |           |       |       |
|-----|-------------|---|------|------|------|-----|----|--------------------|-----------------------------------|---|-----------|-------|-------|
| 151 | IPI00877703 | 1 | 62.2 | N_A  | N_A  | N_A | 99 | FGG 52 kDa protein | FFTSH                             | 1 | 778.3883  | 1.635 | 0.134 |
| 151 | IPI00877703 | 1 | 62.2 | N_A  | N_A  | N_A | 99 | FGG 52 kDa protein | n[145]QSGLYF                      | 1 | 858.4478  | 1.427 | 0.281 |
| 151 | IPI00877703 | 1 | 62.2 | N_A  | N_A  | N_A | 99 | FGG 52 kDa protein | n[145]LTIGEGQQH                   | 2 | 563.8023  | 1.31  | 0.145 |
| 151 | IPI00877703 | 1 | 62.2 | N_A  | N_A  | N_A | 99 | FGG 52 kDa protein | LTYAYF                            | 1 | 917.4768  | 1.334 | 0.289 |
| 152 | IPI00878609 | 1 | 33.5 | 0.69 | 0.02 | 8   | 3  | ITIH4 Protein      | ETLFSVMPGLK                       | 2 | 751.426   | 4.357 | 0.421 |
| 152 | IPI00878609 | 1 | 33.5 | 0.69 | 0.02 | 8   | 3  | ITIH4 Protein      | ETLFSVM[147]PGLK                  | 2 | 759.4235  | 3.992 | 0.419 |
| 152 | IPI00878609 | 1 | 33.5 | 0.69 | 0.02 | 8   | 3  | ITIH4 Protein      | ITFELVYEELLK                      | 2 | 889.011   | 3.679 | 0.459 |
| 152 | IPI00878609 | 1 | 33.5 | 0.69 | 0.02 | 8   | 3  | ITIH4 Protein      | n[145]ETLFSVMPGLK[272]            | 2 | 755.4331  | 3.501 | 0.447 |
| 152 | IPI00878609 | 1 | 33.5 | 0.69 | 0.02 | 8   | 3  | ITIH4 Protein      | n[145]ETLFSVM[147]PGLK[272]       | 2 | 763.4306  | 3.517 | 0.46  |
| 152 | IPI00878609 | 1 | 33.5 | 0.69 | 0.02 | 8   | 3  | ITIH4 Protein      | n[145]QLGLPGPPDVPDHAAYHPFR        | 2 | 1164.6039 | 4.527 | 0.561 |
| 152 | IPI00878609 | 1 | 33.5 | 0.69 | 0.02 | 8   | 3  | ITIH4 Protein      | DQFNLIVFSTEATQWRPSLVPASAENVNK     | 3 | 1181.2861 | 5.92  | 0.573 |
| 152 | IPI00878609 | 1 | 33.5 | 0.69 | 0.02 | 8   | 3  | ITIH4 Protein      | ITFELVYEELLKR                     | 3 | 645.0434  | 3.128 | 0.455 |
| 152 | IPI00878609 | 1 | 33.5 | 0.69 | 0.02 | 8   | 3  | ITIH4 Protein      | n[145]ITFELVYEELLK[272]R          | 3 | 647.7148  | 3.584 | 0.375 |
| 152 | IPI00878609 | 1 | 33.5 | 0.69 | 0.02 | 8   | 3  | ITIH4 Protein      | n[145]NPLVWVHASPEHVVTR            | 3 | 695.3889  | 3.303 | 0.383 |
| 152 | IPI00878609 | 1 | 33.5 | 0.69 | 0.02 | 8   | 3  | ITIH4 Protein      | n[145]QLGLPGPPDVPDHAAYHPFR        | 3 | 776.7384  | 3.683 | 0.368 |
| 152 | IPI00878609 | 1 | 33.5 | 0.69 | 0.02 | 8   | 3  | ITIH4 Protein      | n[145]VPDHAAYHPFR                 | 3 | 485.2534  | 4.443 | 0.388 |
| 152 | IPI00878609 | 1 | 33.5 | 0.69 | 0.02 | 8   | 3  | ITIH4 Protein      | n[145]YIFHNFMER                   | 3 | 467.5682  | 3.928 | 0.357 |
| 152 | IPI00878609 | 1 | 33.5 | 0.69 | 0.02 | 8   | 3  | ITIH4 Protein      | NPLVWVHASPEHVVTR                  | 4 | 520.7917  | 4.709 | 0.506 |
| 152 | IPI00878609 | 1 | 33.5 | 0.69 | 0.02 | 8   | 3  | ITIH4 Protein      | n[145]QLGLPGPPDVPDHAAYHPFR        | 4 | 582.8056  | 2.51  | 0.108 |
| 152 | IPI00878609 | 1 | 33.5 | 0.69 | 0.02 | 8   | 3  | ITIH4 Protein      | n[145]NPLVWVHASPEHVVTR            | 4 | 521.7935  | 3.511 | 0.316 |
| 152 | IPI00878609 | 1 | 33.5 | 0.69 | 0.02 | 8   | 3  | ITIH4 Protein      | GPDVLTATVSGK                      | 2 | 712.9091  | 3.601 | 0.403 |
| 152 | IPI00878609 | 1 | 33.5 | 0.69 | 0.02 | 8   | 3  | ITIH4 Protein      | GSEMVVAGK                         | 2 | 579.321   | 3.157 | 0.35  |
| 152 | IPI00878609 | 1 | 33.5 | 0.69 | 0.02 | 8   | 3  | ITIH4 Protein      | LGVEYELLK                         | 2 | 664.4211  | 3.783 | 0.349 |
| 152 | IPI00878609 | 1 | 33.5 | 0.69 | 0.02 | 8   | 3  | ITIH4 Protein      | n[145]LGVEYELLK[272]              | 2 | 668.4282  | 2.954 | 0.252 |
| 152 | IPI00878609 | 1 | 33.5 | 0.69 | 0.02 | 8   | 3  | ITIH4 Protein      | n[145]GYFVHYFAPEGLTTM[147]PK[272] | 3 | 754.7218  | 4.43  | 0.402 |
| 152 | IPI00878609 | 1 | 33.5 | 0.69 | 0.02 | 8   | 3  | ITIH4 Protein      | n[145]GPDVLTATVSGK[272]           | 2 | 716.9162  | 3.112 | 0.39  |
| 152 | IPI00878609 | 1 | 33.5 | 0.69 | 0.02 | 8   | 3  | ITIH4 Protein      | n[145]GSEMVVAGK[272]              | 2 | 583.3281  | 3.008 | 0.227 |
| 152 | IPI00878609 | 1 | 33.5 | 0.69 | 0.02 | 8   | 3  | ITIH4 Protein      | n[145]GSEM[147]VVAGK[272]         | 2 | 591.3256  | 2.579 | 0.393 |
| 152 | IPI00878609 | 1 | 33.5 | 0.69 | 0.02 | 8   | 3  | ITIH4 Protein      | AGFSWIEVTFK                       | 2 | 782.9298  | 3.932 | 0.318 |
| 152 | IPI00878609 | 1 | 33.5 | 0.69 | 0.02 | 8   | 3  | ITIH4 Protein      | n[145]YIFHNF[147]ER               | 3 | 472.8999  | 2.371 | 0.238 |
| 152 | IPI00878609 | 1 | 33.5 | 0.69 | 0.02 | 8   | 3  | ITIH4 Protein      | GSEM[147]VVAGK                    | 2 | 587.3185  | 1.915 | 0.175 |
| 152 | IPI00878609 | 1 | 33.5 | 0.69 | 0.02 | 8   | 3  | ITIH4 Protein      | n[145]ITFELVYEELLK[272]           | 2 | 893.0181  | 3.429 | 0.274 |
| 152 | IPI00878609 | 1 | 33.5 | 0.69 | 0.02 | 8   | 3  | ITIH4 Protein      | n[145]NVVFVIDK[272]               | 2 | 611.3759  | 2.165 | 0.166 |
| 152 | IPI00878609 | 1 | 33.5 | 0.69 | 0.02 | 8   | 3  | ITIH4 Protein      | n[145]SPEQKETVLDGNLIIR            | 2 | 978.5296  | 4.528 | 0.377 |
| 152 | IPI00878609 | 1 | 33.5 | 0.69 | 0.02 | 8   | 3  | ITIH4 Protein      | NVVFVIDK                          | 2 | 607.3688  | 2.01  | 0.191 |
| 152 | IPI00878609 | 1 | 33.5 | 0.69 | 0.02 | 8   | 3  | ITIH4 Protein      | n[145]LALDNGGLAR                  | 2 | 572.3338  | 2.311 | 0.156 |
| 152 | IPI00878609 | 1 | 33.5 | 0.69 | 0.02 | 8   | 3  | ITIH4 Protein      | RLGVYELLK                         | 3 | 495.3168  | 3.25  | 0.11  |
| 152 | IPI00878609 | 1 | 33.5 | 0.69 | 0.02 | 8   | 3  | ITIH4 Protein      | LALDNGGLAR                        | 2 | 570.3302  | 2.289 | 0.043 |
| 152 | IPI00878609 | 1 | 33.5 | 0.69 | 0.02 | 8   | 3  | ITIH4 Protein      | n[145]YIFHNFMER                   | 2 | 700.8487  | 2.717 | 0.166 |
| 152 | IPI00878609 | 1 | 33.5 | 0.69 | 0.02 | 8   | 3  | ITIH4 Protein      | ETLFSVMPGLK                       | 3 | 501.2864  | 2.829 | 0.124 |
| 152 | IPI00878609 | 1 | 33.5 | 0.69 | 0.02 | 8   | 3  | ITIH4 Protein      | n[145]ILDDLSPR                    | 2 | 536.8096  | 2.837 | 0.092 |
| 152 | IPI00878609 | 1 | 33.5 | 0.69 | 0.02 | 8   | 3  | ITIH4 Protein      | n[145]YIFHNF[147]ER               | 2 | 708.8462  | 2.401 | 0.183 |
| 152 | IPI00878609 | 1 | 33.5 | 0.69 | 0.02 | 8   | 3  | ITIH4 Protein      | n[145]ETLFSVMPGLK[272]            | 3 | 503.9578  | 2.729 | 0.11  |
| 152 | IPI00878609 | 1 | 33.5 | 0.69 | 0.02 | 8   | 3  | ITIH4 Protein      | n[145]ETLFSVM[147]PGLK[272]       | 3 | 509.2895  | 2.297 | 0.107 |
| 152 | IPI00878609 | 1 | 33.5 | 0.69 | 0.02 | 8   | 3  | ITIH4 Protein      | n[145]RLGVYELLK[272]              | 3 | 497.9882  | 2.703 | 0.069 |
| 152 | IPI00878609 | 1 | 33.5 | 0.69 | 0.02 | 8   | 3  | ITIH4 Protein      | n[145]ITFELVYEELLK[272]           | 3 | 595.6811  | 2.701 | 0.158 |
| 152 | IPI00878609 | 1 | 33.5 | 0.69 | 0.02 | 8   | 3  | ITIH4 Protein      | ASPEHVVTR                         | 3 | 412.2349  | 2.659 | 0.256 |
| 152 | IPI00878609 | 1 | 33.5 | 0.69 | 0.02 | 8   | 3  | ITIH4 Protein      | TGLLLLSDPK                        | 2 | 726.4271  | 1.808 | 0.124 |

|     |             |   |      |      |      |    |   |                              |                                 |   |           |       |       |
|-----|-------------|---|------|------|------|----|---|------------------------------|---------------------------------|---|-----------|-------|-------|
| 152 | IPI00878609 | 1 | 33.5 | 0.69 | 0.02 | 8  | 3 | ITIH4 Protein                | n[145]LGVYELLLK[272]            | 3 | 445.9545  | 3.013 | 0.035 |
| 152 | IPI00878609 | 1 | 33.5 | 0.69 | 0.02 | 8  | 3 | ITIH4 Protein                | n[145]EQQETVLDGNLIIR            | 2 | 886.4872  | 4.618 | 0.339 |
| 152 | IPI00878609 | 1 | 33.5 | 0.69 | 0.02 | 8  | 3 | ITIH4 Protein                | n[145]DVL TATVSGK[272]          | 2 | 639.879   | 3.211 | 0.364 |
| 152 | IPI00878609 | 1 | 33.5 | 0.69 | 0.02 | 8  | 3 | ITIH4 Protein                | DVL TATVSGK                     | 2 | 635.8719  | 3.276 | 0.313 |
| 152 | IPI00878609 | 1 | 33.5 | 0.69 | 0.02 | 8  | 3 | ITIH4 Protein                | n[145]ASPEHVVVTR                | 3 | 413.5706  | 2.214 | 0.09  |
| 152 | IPI00878609 | 1 | 33.5 | 0.69 | 0.02 | 8  | 3 | ITIH4 Protein                | n[145]GPDVLTATVSGK[272]         | 3 | 478.2799  | 1.851 | 0.236 |
| 152 | IPI00878609 | 1 | 33.5 | 0.69 | 0.02 | 8  | 3 | ITIH4 Protein                | n[145]ASPEHVVVTR                | 2 | 619.8523  | 3.187 | 0.406 |
| 152 | IPI00878609 | 1 | 33.5 | 0.69 | 0.02 | 8  | 3 | ITIH4 Protein                | n[145]AGFSWIEVTFK               | 2 | 784.9333  | 2.937 | 0.137 |
| 152 | IPI00878609 | 1 | 33.5 | 0.69 | 0.02 | 8  | 3 | ITIH4 Protein                | ITFELVYEELLK                    | 3 | 593.0097  | 2.541 | 0.114 |
| 152 | IPI00878609 | 1 | 33.5 | 0.69 | 0.02 | 8  | 3 | ITIH4 Protein                | n[145]PEQGV EVTGQYER            | 2 | 818.4084  | 3.286 | 0.191 |
| 152 | IPI00878609 | 1 | 33.5 | 0.69 | 0.02 | 8  | 3 | ITIH4 Protein                | n[145]PTVGETNPR                 | 2 | 557.8023  | 2.412 | 0.24  |
| 152 | IPI00878609 | 1 | 33.5 | 0.69 | 0.02 | 8  | 3 | ITIH4 Protein                | n[145]GVYELLLK[272]             | 2 | 611.8861  | 3.001 | 0.124 |
| 152 | IPI00878609 | 1 | 33.5 | 0.69 | 0.02 | 8  | 3 | ITIH4 Protein                | n[145]NPLVWVH                   | 2 | 504.791   | 1.941 | 0.296 |
| 152 | IPI00878609 | 1 | 33.5 | 0.69 | 0.02 | 8  | 3 | ITIH4 Protein                | n[145]LDNGGLAR                  | 2 | 480.2732  | 1.943 | 0.069 |
| 152 | IPI00878609 | 1 | 33.5 | 0.69 | 0.02 | 8  | 3 | ITIH4 Protein                | n[145]VPDHAAYHPFR               | 4 | 364.1919  | 2.422 | 0.099 |
| 152 | IPI00878609 | 1 | 33.5 | 0.69 | 0.02 | 8  | 3 | ITIH4 Protein                | n[145]WKETLFSVM[147]PGLK        | 3 | 659.3769  | 4.075 | 0.334 |
| 152 | IPI00878609 | 1 | 33.5 | 0.69 | 0.02 | 8  | 3 | ITIH4 Protein                | n[145]FSSHVGGT LGQF             | 2 | 690.8551  | 2.617 | 0.303 |
| 152 | IPI00878609 | 1 | 33.5 | 0.69 | 0.02 | 8  | 3 | ITIH4 Protein                | HLQM[147]DIH                    | 3 | 350.5114  | 2.378 | 0.095 |
| 152 | IPI00878609 | 1 | 33.5 | 0.69 | 0.02 | 8  | 3 | ITIH4 Protein                | ASPEHVVVTR                      | 2 | 617.8488  | 2.549 | 0.159 |
| 152 | IPI00878609 | 1 | 33.5 | 0.69 | 0.02 | 8  | 3 | ITIH4 Protein                | n[145]HLQM[147]DIH              | 3 | 351.8471  | 1.653 | 0.128 |
| 153 | IPI00892604 | 1 | 51.4 | 0.53 | 0.08 | 12 | 7 | C4B Complement component C4B | CSVFGAPSK                       | 2 | 692.8413  | 4.156 | 0.508 |
| 153 | IPI00892604 | 1 | 51.4 | 0.53 | 0.08 | 12 | 7 | C4B Complement component C4B | EMSGSPASGIPVK                   | 2 | 770.4136  | 4.147 | 0.436 |
| 153 | IPI00892604 | 1 | 51.4 | 0.53 | 0.08 | 12 | 7 | C4B Complement component C4B | GLEEELQFSLGSK                   | 2 | 858.962   | 5.125 | 0.492 |
| 153 | IPI00892604 | 1 | 51.4 | 0.53 | 0.08 | 12 | 7 | C4B Complement component C4B | ITQVLHFTK                       | 2 | 683.9139  | 3.962 | 0.391 |
| 153 | IPI00892604 | 1 | 51.4 | 0.53 | 0.08 | 12 | 7 | C4B Complement component C4B | LTVAAPP SGGPGFLSIER             | 2 | 955.0307  | 3.152 | 0.543 |
| 153 | IPI00892604 | 1 | 51.4 | 0.53 | 0.08 | 12 | 7 | C4B Complement component C4B | VDVQAGACEGK                     | 2 | 701.8445  | 3.485 | 0.518 |
| 153 | IPI00892604 | 1 | 51.4 | 0.53 | 0.08 | 12 | 7 | C4B Complement component C4B | n[145]ASAGLLGAHAAAITAY          | 2 | 801.442   | 4.133 | 0.557 |
| 153 | IPI00892604 | 1 | 51.4 | 0.53 | 0.08 | 12 | 7 | C4B Complement component C4B | n[145]AVGSGATFSHY               | 2 | 620.8076  | 3.784 | 0.508 |
| 153 | IPI00892604 | 1 | 51.4 | 0.53 | 0.08 | 12 | 7 | C4B Complement component C4B | n[145]AVGSGATFSHY               | 2 | 702.3393  | 3.831 | 0.484 |
| 153 | IPI00892604 | 1 | 51.4 | 0.53 | 0.08 | 12 | 7 | C4B Complement component C4B | n[145]AVGSGATFSHY               | 2 | 857.3886  | 3.96  | 0.462 |
| 153 | IPI00892604 | 1 | 51.4 | 0.53 | 0.08 | 12 | 7 | C4B Complement component C4B | n[145]AVGSGATFSHY               | 2 | 696.8484  | 3.605 | 0.505 |
| 153 | IPI00892604 | 1 | 51.4 | 0.53 | 0.08 | 12 | 7 | C4B Complement component C4B | n[145]CSVFGAPSK[272]            | 2 | 696.8484  | 3.605 | 0.505 |
| 153 | IPI00892604 | 1 | 51.4 | 0.53 | 0.08 | 12 | 7 | C4B Complement component C4B | n[145]DFALLSLQVPLK[272]         | 2 | 816.5024  | 3.455 | 0.45  |
| 153 | IPI00892604 | 1 | 51.4 | 0.53 | 0.08 | 12 | 7 | C4B Complement component C4B | n[145]EELVYELNPLDHR             | 2 | 885.9608  | 4.22  | 0.472 |
| 153 | IPI00892604 | 1 | 51.4 | 0.53 | 0.08 | 12 | 7 | C4B Complement component C4B | n[145]EMSGSPASGIPVK[272]        | 2 | 774.4207  | 4.123 | 0.379 |
| 153 | IPI00892604 | 1 | 51.4 | 0.53 | 0.08 | 12 | 7 | C4B Complement component C4B | n[145]EM[147]SGSPASGIPVK[272]   | 2 | 782.4182  | 3.423 | 0.423 |
| 153 | IPI00892604 | 1 | 51.4 | 0.53 | 0.08 | 12 | 7 | C4B Complement component C4B | n[145]EPFLS CCQFAESLR           | 2 | 933.4124  | 3.714 | 0.583 |
| 153 | IPI00892604 | 1 | 51.4 | 0.53 | 0.08 | 12 | 7 | C4B Complement component C4B | n[145]GHLFLQTDQPIY NPGQR        | 2 | 1064.5565 | 5.825 | 0.54  |
| 153 | IPI00892604 | 1 | 51.4 | 0.53 | 0.08 | 12 | 7 | C4B Complement component C4B | n[145]GLEEELQFSLGSK[272]        | 2 | 862.9691  | 4.809 | 0.498 |
| 153 | IPI00892604 | 1 | 51.4 | 0.53 | 0.08 | 12 | 7 | C4B Complement component C4B | n[145]GSFEFPVGD AVSK[272]       | 2 | 814.4322  | 4.699 | 0.476 |
| 153 | IPI00892604 | 1 | 51.4 | 0.53 | 0.08 | 12 | 7 | C4B Complement component C4B | n[145]LSCCQFAESLR               | 2 | 746.8305  | 3.205 | 0.529 |
| 153 | IPI00892604 | 1 | 51.4 | 0.53 | 0.08 | 12 | 7 | C4B Complement component C4B | n[145]LTVAAPP SGGPGFLSIER       | 2 | 957.0343  | 4.08  | 0.218 |
| 153 | IPI00892604 | 1 | 51.4 | 0.53 | 0.08 | 12 | 7 | C4B Complement component C4B | n[145]TTNIQGINLLFSSR            | 2 | 854.4792  | 5.063 | 0.513 |
| 153 | IPI00892604 | 1 | 51.4 | 0.53 | 0.08 | 12 | 7 | C4B Complement component C4B | AEFQDALEKLNMGITDLQGLR           | 3 | 881.4705  | 6.043 | 0.517 |
| 153 | IPI00892604 | 1 | 51.4 | 0.53 | 0.08 | 12 | 7 | C4B Complement component C4B | GPEVQLVAHSPWLK                  | 3 | 614.3526  | 4.21  | 0.408 |
| 153 | IPI00892604 | 1 | 51.4 | 0.53 | 0.08 | 12 | 7 | C4B Complement component C4B | n[145]AVGSGATFSHY               | 3 | 728.3619  | 4.226 | 0.445 |
| 153 | IPI00892604 | 1 | 51.4 | 0.53 | 0.08 | 12 | 7 | C4B Complement component C4B | n[145]DFALLSLQVPLK[272]DAK[272] | 3 | 697.4244  | 4.647 | 0.48  |
| 153 | IPI00892604 | 1 | 51.4 | 0.53 | 0.08 | 12 | 7 | C4B Complement component C4B | n[145]GHLFLQTDQPIY NPGQR        | 3 | 710.0401  | 5.031 | 0.376 |
| 153 | IPI00892604 | 1 | 51.4 | 0.53 | 0.08 | 12 | 7 | C4B Complement component C4B | n[145]GPEVQLVAHSPWLK[272]       | 3 | 617.024   | 3.685 | 0.406 |

|     |             |   |      |      |      |    |   |                              |                                            |   |           |       |       |
|-----|-------------|---|------|------|------|----|---|------------------------------|--------------------------------------------|---|-----------|-------|-------|
| 153 | IPI00892604 | 1 | 51.4 | 0.53 | 0.08 | 12 | 7 | C4B Complement component C4B | n[145]LLATLCSAEVCQCAEGK[272]               | 3 | 722.333   | 4.18  | 0.507 |
| 153 | IPI00892604 | 1 | 51.4 | 0.53 | 0.08 | 12 | 7 | C4B Complement component C4B | n[145]ITPGK[272]PYILTVPGHLDDEM[147]QLDIQAR | 3 | 1037.2368 | 5.251 | 0.365 |
| 153 | IPI00892604 | 1 | 51.4 | 0.53 | 0.08 | 12 | 7 | C4B Complement component C4B | n[145]RGHLFLQTDQPIYNPGQR                   | 3 | 762.0738  | 5.052 | 0.404 |
| 153 | IPI00892604 | 1 | 51.4 | 0.53 | 0.08 | 12 | 7 | C4B Complement component C4B | n[145]VGLSGM[147]AIADVTLTLLSGFHALR         | 3 | 763.4233  | 4.694 | 0.422 |
| 153 | IPI00892604 | 1 | 51.4 | 0.53 | 0.08 | 12 | 7 | C4B Complement component C4B | n[145]YVSHFETEGETPHVLLYFDSVPTSR            | 3 | 942.1403  | 6.174 | 0.531 |
| 153 | IPI00892604 | 1 | 51.4 | 0.53 | 0.08 | 12 | 7 | C4B Complement component C4B | ITPGKPYILTVPGHLDDEMQLDIQAR                 | 4 | 772.1772  | 3.963 | 0.414 |
| 153 | IPI00892604 | 1 | 51.4 | 0.53 | 0.08 | 12 | 7 | C4B Complement component C4B | ITPGKPYILTVPGHLDDEM[147]QLDIQAR            | 4 | 776.1759  | 5.288 | 0.551 |
| 153 | IPI00892604 | 1 | 51.4 | 0.53 | 0.08 | 12 | 7 | C4B Complement component C4B | n[145]ITPGK[272]PYILTVPGHLDDEMQLDIQAR      | 4 | 774.1807  | 6.085 | 0.461 |
| 153 | IPI00892604 | 1 | 51.4 | 0.53 | 0.08 | 12 | 7 | C4B Complement component C4B | n[145]ITPGK[272]PYILTVPGHLDDEM[147]QLDIQAR | 4 | 778.1794  | 2.699 | 0.069 |
| 153 | IPI00892604 | 1 | 51.4 | 0.53 | 0.08 | 12 | 7 | C4B Complement component C4B | AEFQDALEK                                  | 2 | 665.8537  | 3.858 | 0.355 |
| 153 | IPI00892604 | 1 | 51.4 | 0.53 | 0.08 | 12 | 7 | C4B Complement component C4B | n[145]FACYYPR                              | 2 | 555.2551  | 2.206 | 0.17  |
| 153 | IPI00892604 | 1 | 51.4 | 0.53 | 0.08 | 12 | 7 | C4B Complement component C4B | n[145]LGQYASPTAK[272]                      | 2 | 662.3792  | 3.844 | 0.386 |
| 153 | IPI00892604 | 1 | 51.4 | 0.53 | 0.08 | 12 | 7 | C4B Complement component C4B | AEFQDALEKLNLM[147]GITDLQGLR                | 3 | 886.8022  | 4.25  | 0.428 |
| 153 | IPI00892604 | 1 | 51.4 | 0.53 | 0.08 | 12 | 7 | C4B Complement component C4B | DFALLSLQVPLKDAK                            | 3 | 693.4173  | 3.988 | 0.442 |
| 153 | IPI00892604 | 1 | 51.4 | 0.53 | 0.08 | 12 | 7 | C4B Complement component C4B | GPEVQLVAHSPWLK[272]                        | 3 | 615.6883  | 3.613 | 0.322 |
| 153 | IPI00892604 | 1 | 51.4 | 0.53 | 0.08 | 12 | 7 | C4B Complement component C4B | KYVLPNFEVK                                 | 3 | 552.9994  | 2.879 | 0.147 |
| 153 | IPI00892604 | 1 | 51.4 | 0.53 | 0.08 | 12 | 7 | C4B Complement component C4B | ITPGKPYILTVPGHLDDEM[147]QLDIQAR            | 3 | 1034.5654 | 4.917 | 0.418 |
| 153 | IPI00892604 | 1 | 51.4 | 0.53 | 0.08 | 12 | 7 | C4B Complement component C4B | ITQVLHFTK                                  | 3 | 456.2784  | 2.988 | 0.284 |
| 153 | IPI00892604 | 1 | 51.4 | 0.53 | 0.08 | 12 | 7 | C4B Complement component C4B | n[145]DK[272]GQAGLQR                       | 3 | 420.9136  | 3.407 | 0.36  |
| 153 | IPI00892604 | 1 | 51.4 | 0.53 | 0.08 | 12 | 7 | C4B Complement component C4B | n[145]EPFLSCCQFAESLR                       | 3 | 622.6107  | 2.858 | 0.354 |
| 153 | IPI00892604 | 1 | 51.4 | 0.53 | 0.08 | 12 | 7 | C4B Complement component C4B | n[145]HLVPGAPFLLQALVR                      | 3 | 592.3653  | 3.268 | 0.352 |
| 153 | IPI00892604 | 1 | 51.4 | 0.53 | 0.08 | 12 | 7 | C4B Complement component C4B | n[145]ITQVLHFTK[272]                       | 3 | 458.9498  | 3.398 | 0.281 |
| 153 | IPI00892604 | 1 | 51.4 | 0.53 | 0.08 | 12 | 7 | C4B Complement component C4B | n[145]TTNIQGINLLFSSR                       | 3 | 569.9885  | 2.805 | 0.291 |
| 153 | IPI00892604 | 1 | 51.4 | 0.53 | 0.08 | 12 | 7 | C4B Complement component C4B | n[145]VLQIEK[272]JEGAIHR                   | 3 | 561.0048  | 3.426 | 0.317 |
| 153 | IPI00892604 | 1 | 51.4 | 0.53 | 0.08 | 12 | 7 | C4B Complement component C4B | n[145]YIYGK[272]PVQGVAYVR                  | 3 | 634.3678  | 2.501 | 0.405 |
| 153 | IPI00892604 | 1 | 51.4 | 0.53 | 0.08 | 12 | 7 | C4B Complement component C4B | SHKPLNM[147]GK                             | 4 | 362.7106  | 2.598 | 0.371 |
| 153 | IPI00892604 | 1 | 51.4 | 0.53 | 0.08 | 12 | 7 | C4B Complement component C4B | n[145]MRPSTDTITVMVENSHGLR                  | 4 | 572.7957  | 5.056 | 0.307 |
| 153 | IPI00892604 | 1 | 51.4 | 0.53 | 0.08 | 12 | 7 | C4B Complement component C4B | n[145]STQDTVIALDALSAYWIASHTTEER            | 4 | 731.3705  | 3.342 | 0.297 |
| 153 | IPI00892604 | 1 | 51.4 | 0.53 | 0.08 | 12 | 7 | C4B Complement component C4B | n[145]JEGAIHREELVYELNPLDHR                 | 5 | 487.6577  | 2.881 | 0.221 |
| 153 | IPI00892604 | 1 | 51.4 | 0.53 | 0.08 | 12 | 7 | C4B Complement component C4B | DFALLSLQVPLK                               | 2 | 812.4953  | 3.688 | 0.363 |
| 153 | IPI00892604 | 1 | 51.4 | 0.53 | 0.08 | 12 | 7 | C4B Complement component C4B | DHAVDLIQK                                  | 2 | 659.8776  | 3.61  | 0.293 |
| 153 | IPI00892604 | 1 | 51.4 | 0.53 | 0.08 | 12 | 7 | C4B Complement component C4B | EM[147]SGSPASGIPVK                         | 2 | 778.4111  | 3.563 | 0.457 |
| 153 | IPI00892604 | 1 | 51.4 | 0.53 | 0.08 | 12 | 7 | C4B Complement component C4B | LNLM[147]GITDLQGLR                         | 2 | 743.906   | 3.41  | 0.381 |
| 153 | IPI00892604 | 1 | 51.4 | 0.53 | 0.08 | 12 | 7 | C4B Complement component C4B | VEYGFQVK                                   | 2 | 625.3506  | 2.739 | 0.251 |
| 153 | IPI00892604 | 1 | 51.4 | 0.53 | 0.08 | 12 | 7 | C4B Complement component C4B | n[145]DHAVDLIQK[272]                       | 2 | 663.8847  | 3.194 | 0.253 |
| 153 | IPI00892604 | 1 | 51.4 | 0.53 | 0.08 | 12 | 7 | C4B Complement component C4B | n[145]GLQDEDEGYR                           | 2 | 598.7869  | 2.88  | 0.329 |
| 153 | IPI00892604 | 1 | 51.4 | 0.53 | 0.08 | 12 | 7 | C4B Complement component C4B | n[145]ITQVLHFTK[272]                       | 2 | 687.921   | 3.949 | 0.349 |
| 153 | IPI00892604 | 1 | 51.4 | 0.53 | 0.08 | 12 | 7 | C4B Complement component C4B | n[145]VEYGFQVK[272]                        | 2 | 629.3577  | 2.729 | 0.346 |
| 153 | IPI00892604 | 1 | 51.4 | 0.53 | 0.08 | 12 | 7 | C4B Complement component C4B | n[145]VLSLAQEYVGGVGSPEK[272]               | 2 | 915.5142  | 3.649 | 0.451 |
| 153 | IPI00892604 | 1 | 51.4 | 0.53 | 0.08 | 12 | 7 | C4B Complement component C4B | DKGQAGLQR                                  | 3 | 418.2422  | 3.421 | 0.265 |
| 153 | IPI00892604 | 1 | 51.4 | 0.53 | 0.08 | 12 | 7 | C4B Complement component C4B | n[145]AIADVTLTLLSGFHALR                    | 3 | 576.669   | 4.098 | 0.39  |
| 153 | IPI00892604 | 1 | 51.4 | 0.53 | 0.08 | 12 | 7 | C4B Complement component C4B | n[145]ALLHLLHEGK[272]                      | 3 | 511.3236  | 3.916 | 0.369 |
| 153 | IPI00892604 | 1 | 51.4 | 0.53 | 0.08 | 12 | 7 | C4B Complement component C4B | n[145]FGLLDEDEGK[272]K[272]TFFR            | 3 | 702.3967  | 2.659 | 0.366 |
| 153 | IPI00892604 | 1 | 51.4 | 0.53 | 0.08 | 12 | 7 | C4B Complement component C4B | n[145]FGLLDEDEGK[272]K[272]TFFR            | 4 | 527.0494  | 2.623 | 0.329 |
| 153 | IPI00892604 | 1 | 51.4 | 0.53 | 0.08 | 12 | 7 | C4B Complement component C4B | n[145]SHK[272]PLNM[147]GK[272]             | 4 | 365.7159  | 1.622 | 0.034 |
| 153 | IPI00892604 | 1 | 51.4 | 0.53 | 0.08 | 12 | 7 | C4B Complement component C4B | LGQYASPTAK                                 | 2 | 658.3721  | 3.374 | 0.31  |
| 153 | IPI00892604 | 1 | 51.4 | 0.53 | 0.08 | 12 | 7 | C4B Complement component C4B | n[145]ADGSYAAWLSR                          | 2 | 670.8394  | 3.681 | 0.33  |
| 153 | IPI00892604 | 1 | 51.4 | 0.53 | 0.08 | 12 | 7 | C4B Complement component C4B | n[145]AEMADQAAAWLTR                        | 2 | 789.3968  | 3.115 | 0.376 |

|     |             |   |      |      |      |    |   |                              |                                |   |           |       |       |
|-----|-------------|---|------|------|------|----|---|------------------------------|--------------------------------|---|-----------|-------|-------|
| 153 | IPI00892604 | 1 | 51.4 | 0.53 | 0.08 | 12 | 7 | C4B Complement component C4B | n[145]FGLLEDEGK[272]K[272]     | 2 | 777.4486  | 3.327 | 0.363 |
| 153 | IPI00892604 | 1 | 51.4 | 0.53 | 0.08 | 12 | 7 | C4B Complement component C4B | n[145]LNM[147]GITDLQGLR        | 2 | 745.9095  | 3.401 | 0.326 |
| 153 | IPI00892604 | 1 | 51.4 | 0.53 | 0.08 | 12 | 7 | C4B Complement component C4B | n[145]AEM[147]ADQAAWLTR        | 2 | 797.3942  | 3.361 | 0.321 |
| 153 | IPI00892604 | 1 | 51.4 | 0.53 | 0.08 | 12 | 7 | C4B Complement component C4B | n[145]GLCVATPVQLR              | 2 | 673.8739  | 2.58  | 0.407 |
| 153 | IPI00892604 | 1 | 51.4 | 0.53 | 0.08 | 12 | 7 | C4B Complement component C4B | n[145]LNMGITDLQGLR             | 2 | 737.9121  | 3.365 | 0.22  |
| 153 | IPI00892604 | 1 | 51.4 | 0.53 | 0.08 | 12 | 7 | C4B Complement component C4B | n[145]SCGLHQLLR                | 2 | 608.8242  | 2.867 | 0.302 |
| 153 | IPI00892604 | 1 | 51.4 | 0.53 | 0.08 | 12 | 7 | C4B Complement component C4B | n[145]VGDTLNLNLR               | 2 | 629.8654  | 2.679 | 0.19  |
| 153 | IPI00892604 | 1 | 51.4 | 0.53 | 0.08 | 12 | 7 | C4B Complement component C4B | FGLLEDEGKKTFFR                 | 3 | 698.3896  | 3.087 | 0.297 |
| 153 | IPI00892604 | 1 | 51.4 | 0.53 | 0.08 | 12 | 7 | C4B Complement component C4B | n[145]DHAVDLIQK[272]           | 3 | 442.9255  | 3.57  | 0.152 |
| 153 | IPI00892604 | 1 | 51.4 | 0.53 | 0.08 | 12 | 7 | C4B Complement component C4B | n[145]GLQDEDEGYR               | 1 | 1196.5665 | 2.57  | 0.3   |
| 153 | IPI00892604 | 1 | 51.4 | 0.53 | 0.08 | 12 | 7 | C4B Complement component C4B | LNMGITDLQGLR                   | 2 | 735.9085  | 3.131 | 0.288 |
| 153 | IPI00892604 | 1 | 51.4 | 0.53 | 0.08 | 12 | 7 | C4B Complement component C4B | n[145]ASSFLGEK[272]            | 2 | 563.821   | 2.836 | 0.232 |
| 153 | IPI00892604 | 1 | 51.4 | 0.53 | 0.08 | 12 | 7 | C4B Complement component C4B | n[145]TYNVLDM[147]K[272]       | 2 | 644.3465  | 1.719 | 0.281 |
| 153 | IPI00892604 | 1 | 51.4 | 0.53 | 0.08 | 12 | 7 | C4B Complement component C4B | VLQIEKGAHR                     | 3 | 558.3334  | 3.607 | 0.24  |
| 153 | IPI00892604 | 1 | 51.4 | 0.53 | 0.08 | 12 | 7 | C4B Complement component C4B | ASSFLGEK                       | 2 | 559.8139  | 1.671 | 0.158 |
| 153 | IPI00892604 | 1 | 51.4 | 0.53 | 0.08 | 12 | 7 | C4B Complement component C4B | GSFEFPVGDVASK                  | 2 | 810.4251  | 3.529 | 0.313 |
| 153 | IPI00892604 | 1 | 51.4 | 0.53 | 0.08 | 12 | 7 | C4B Complement component C4B | KYVLPNFEVK                     | 2 | 828.9955  | 3.814 | 0.224 |
| 153 | IPI00892604 | 1 | 51.4 | 0.53 | 0.08 | 12 | 7 | C4B Complement component C4B | n[145]TYNVLDMK[272]            | 2 | 636.3491  | 2.97  | 0.146 |
| 153 | IPI00892604 | 1 | 51.4 | 0.53 | 0.08 | 12 | 7 | C4B Complement component C4B | EVQLVAHSPWLK                   | 3 | 562.9945  | 3.755 | 0.333 |
| 153 | IPI00892604 | 1 | 51.4 | 0.53 | 0.08 | 12 | 7 | C4B Complement component C4B | n[145]SFQDLSPVIHR              | 3 | 481.6006  | 3.483 | 0.348 |
| 153 | IPI00892604 | 1 | 51.4 | 0.53 | 0.08 | 12 | 7 | C4B Complement component C4B | SHKPLNM[147]GK                 | 2 | 724.4138  | 2.044 | 0.214 |
| 153 | IPI00892604 | 1 | 51.4 | 0.53 | 0.08 | 12 | 7 | C4B Complement component C4B | YVLPNFEVK                      | 2 | 694.9005  | 2.675 | 0.216 |
| 153 | IPI00892604 | 1 | 51.4 | 0.53 | 0.08 | 12 | 7 | C4B Complement component C4B | n[145]AEFQDALEK[272]           | 2 | 669.8608  | 3.67  | 0.174 |
| 153 | IPI00892604 | 1 | 51.4 | 0.53 | 0.08 | 12 | 7 | C4B Complement component C4B | n[145]VDVQAGACEGK[272]         | 2 | 705.8516  | 3.878 | 0.382 |
| 153 | IPI00892604 | 1 | 51.4 | 0.53 | 0.08 | 12 | 7 | C4B Complement component C4B | n[145]VVEEQESR                 | 2 | 560.2918  | 2.084 | 0.38  |
| 153 | IPI00892604 | 1 | 51.4 | 0.53 | 0.08 | 12 | 7 | C4B Complement component C4B | AIADVTLLSGFHALLR               | 3 | 575.3333  | 3.071 | 0.402 |
| 153 | IPI00892604 | 1 | 51.4 | 0.53 | 0.08 | 12 | 7 | C4B Complement component C4B | EAPKVVEEQESR                   | 3 | 560.9687  | 2.849 | 0.27  |
| 153 | IPI00892604 | 1 | 51.4 | 0.53 | 0.08 | 12 | 7 | C4B Complement component C4B | FGLLEDEGKK                     | 3 | 514.6277  | 2.275 | 0.294 |
| 153 | IPI00892604 | 1 | 51.4 | 0.53 | 0.08 | 12 | 7 | C4B Complement component C4B | n[145]AACAQLNDFLQEYGTQGCQV     | 3 | 799.0151  | 2.752 | 0.27  |
| 153 | IPI00892604 | 1 | 51.4 | 0.53 | 0.08 | 12 | 7 | C4B Complement component C4B | n[145]LELSVDGAK[272]           | 2 | 610.3605  | 3.274 | 0.238 |
| 153 | IPI00892604 | 1 | 51.4 | 0.53 | 0.08 | 12 | 7 | C4B Complement component C4B | n[145]SHK[272]PLNM[147]GK[272] | 2 | 730.4245  | 1.698 | 0.204 |
| 153 | IPI00892604 | 1 | 51.4 | 0.53 | 0.08 | 12 | 7 | C4B Complement component C4B | n[145]YVLPNFEVK[272]           | 2 | 698.9076  | 1.903 | 0.149 |
| 153 | IPI00892604 | 1 | 51.4 | 0.53 | 0.08 | 12 | 7 | C4B Complement component C4B | TYNVLDM[147]K                  | 2 | 640.3394  | 2.201 | 0.094 |
| 153 | IPI00892604 | 1 | 51.4 | 0.53 | 0.08 | 12 | 7 | C4B Complement component C4B | n[145]LTLSDR                   | 2 | 468.2676  | 2.423 | 0.146 |
| 153 | IPI00892604 | 1 | 51.4 | 0.53 | 0.08 | 12 | 7 | C4B Complement component C4B | n[145]LTVAAPSGGPGFLSIER        | 3 | 638.3586  | 4.106 | 0.332 |
| 153 | IPI00892604 | 1 | 51.4 | 0.53 | 0.08 | 12 | 7 | C4B Complement component C4B | n[145]VTASDPLDTLSEGLSPGGVALLR  | 3 | 876.4718  | 3.352 | 0.189 |
| 153 | IPI00892604 | 1 | 51.4 | 0.53 | 0.08 | 12 | 7 | C4B Complement component C4B | n[145]VEASISK[272]             | 2 | 511.3103  | 2.247 | 0.173 |
| 153 | IPI00892604 | 1 | 51.4 | 0.53 | 0.08 | 12 | 7 | C4B Complement component C4B | VQQPDCR                        | 2 | 516.2417  | 2.111 | 0.272 |
| 153 | IPI00892604 | 1 | 51.4 | 0.53 | 0.08 | 12 | 7 | C4B Complement component C4B | FGLLEDEGKK                     | 2 | 771.438   | 3.21  | 0.188 |
| 153 | IPI00892604 | 1 | 51.4 | 0.53 | 0.08 | 12 | 7 | C4B Complement component C4B | NNVPCSPK                       | 2 | 592.7994  | 2.199 | 0.257 |
| 153 | IPI00892604 | 1 | 51.4 | 0.53 | 0.08 | 12 | 7 | C4B Complement component C4B | TYNVLDMK                       | 2 | 632.342   | 2.078 | 0.119 |
| 153 | IPI00892604 | 1 | 51.4 | 0.53 | 0.08 | 12 | 7 | C4B Complement component C4B | n[145]SHK[272]PLNMGK[272]      | 2 | 722.427   | 2.703 | 0.232 |
| 153 | IPI00892604 | 1 | 51.4 | 0.53 | 0.08 | 12 | 7 | C4B Complement component C4B | VEASISK                        | 2 | 507.3032  | 2.326 | 0.154 |
| 153 | IPI00892604 | 1 | 51.4 | 0.53 | 0.08 | 12 | 7 | C4B Complement component C4B | n[145]NVNFQK[272]              | 2 | 519.3028  | 2.35  | 0.172 |
| 153 | IPI00892604 | 1 | 51.4 | 0.53 | 0.08 | 12 | 7 | C4B Complement component C4B | n[145]VDFTLSSER                | 2 | 599.3152  | 2.187 | 0.218 |
| 153 | IPI00892604 | 1 | 51.4 | 0.53 | 0.08 | 12 | 7 | C4B Complement component C4B | n[145]SHK[272]PLNMGK[272]      | 4 | 361.7171  | 2.497 | 0.132 |
| 153 | IPI00892604 | 1 | 51.4 | 0.53 | 0.08 | 12 | 7 | C4B Complement component C4B | SHKPLNMGK                      | 3 | 477.9466  | 2.093 | 0.224 |
| 153 | IPI00892604 | 1 | 51.4 | 0.53 | 0.08 | 12 | 7 | C4B Complement component C4B | n[145]EVQLVAHSPWLK[272]        | 3 | 565.6659  | 3.689 | 0.225 |



|     |             |   |      |      |      |    |   |                              |                                |   |           |       |       |
|-----|-------------|---|------|------|------|----|---|------------------------------|--------------------------------|---|-----------|-------|-------|
| 153 | IPI00892604 | 1 | 51.4 | 0.53 | 0.08 | 12 | 7 | C4B Complement component C4B | n[145]QGSFQGGFR                | 2 | 564.2894  | 2.462 | 0.184 |
| 153 | IPI00892604 | 1 | 51.4 | 0.53 | 0.08 | 12 | 7 | C4B Complement component C4B | n[145]VEASISK[272]             | 1 | 1021.6133 | 2.575 | 0.098 |
| 153 | IPI00892604 | 1 | 51.4 | 0.53 | 0.08 | 12 | 7 | C4B Complement component C4B | n[145]SHK[272]PLNM[147]GK[272] | 3 | 487.2854  | 1.917 | 0.235 |
| 153 | IPI00892604 | 1 | 51.4 | 0.53 | 0.08 | 12 | 7 | C4B Complement component C4B | FGLLEDGK                       | 2 | 637.343   | 2.87  | 0.132 |
| 153 | IPI00892604 | 1 | 51.4 | 0.53 | 0.08 | 12 | 7 | C4B Complement component C4B | TEQWSTLPPETK                   | 2 | 848.9489  | 2.692 | 0.186 |
| 153 | IPI00892604 | 1 | 51.4 | 0.53 | 0.08 | 12 | 7 | C4B Complement component C4B | LELSVDGAK                      | 2 | 606.3534  | 2.333 | 0.235 |
| 153 | IPI00892604 | 1 | 51.4 | 0.53 | 0.08 | 12 | 7 | C4B Complement component C4B | NVNFQK                         | 2 | 515.2957  | 2.077 | 0.171 |
| 153 | IPI00892604 | 1 | 51.4 | 0.53 | 0.08 | 12 | 7 | C4B Complement component C4B | n[145]NNVPCSPK[272]            | 2 | 596.8065  | 2.336 | 0.204 |
| 153 | IPI00892604 | 1 | 51.4 | 0.53 | 0.08 | 12 | 7 | C4B Complement component C4B | n[145]EFHLHLR                  | 2 | 548.3126  | 2.549 | 0.118 |
| 153 | IPI00892604 | 1 | 51.4 | 0.53 | 0.08 | 12 | 7 | C4B Complement component C4B | SHKPLNM[147]GK                 | 3 | 483.2783  | 1.704 | 0.242 |
| 153 | IPI00892604 | 1 | 51.4 | 0.53 | 0.08 | 12 | 7 | C4B Complement component C4B | n[145]MRPSTDTITVM[147]VENSHGLR | 3 | 768.7234  | 3.518 | 0.11  |
| 153 | IPI00892604 | 1 | 51.4 | 0.53 | 0.08 | 12 | 7 | C4B Complement component C4B | SHKPLNMGK                      | 2 | 716.4163  | 2.134 | 0.19  |
| 153 | IPI00892604 | 1 | 51.4 | 0.53 | 0.08 | 12 | 7 | C4B Complement component C4B | n[145]VFAIDQK[272]             | 2 | 554.8339  | 1.325 | 0.127 |
| 153 | IPI00892604 | 1 | 51.4 | 0.53 | 0.08 | 12 | 7 | C4B Complement component C4B | n[145]EGAIHREELVYELNPLDHR      | 4 | 609.3204  | 2.196 | 0.158 |
| 153 | IPI00892604 | 1 | 51.4 | 0.53 | 0.08 | 12 | 7 | C4B Complement component C4B | n[145]VQQPDCR                  | 2 | 518.2452  | 2.174 | 0.135 |
| 153 | IPI00892604 | 1 | 51.4 | 0.53 | 0.08 | 12 | 7 | C4B Complement component C4B | n[145]PVAFSVPTAAA VSLK[272]    | 3 | 639.3868  | 2.837 | 0.351 |
| 153 | IPI00892604 | 1 | 51.4 | 0.53 | 0.08 | 12 | 7 | C4B Complement component C4B | n[145]GQIVFM[147]NR            | 2 | 562.8038  | 2.855 | 0.244 |
| 153 | IPI00892604 | 1 | 51.4 | 0.53 | 0.08 | 12 | 7 | C4B Complement component C4B | n[145]SHK[272]PLNMGK[272]      | 3 | 481.9537  | 2.203 | 0.161 |
| 153 | IPI00892604 | 1 | 51.4 | 0.53 | 0.08 | 12 | 7 | C4B Complement component C4B | n[145]RGHLFLQTDQPIYNPGQR       | 4 | 571.8072  | 3.249 | 0.088 |
| 153 | IPI00892604 | 1 | 51.4 | 0.53 | 0.08 | 12 | 7 | C4B Complement component C4B | n[145]TEQWSTLPPETK[272]        | 2 | 852.956   | 1.61  | 0.276 |
| 153 | IPI00892604 | 1 | 51.4 | 0.53 | 0.08 | 12 | 7 | C4B Complement component C4B | n[145]CSVFGAPSK[272]           | 3 | 464.9013  | 1.687 | 0.199 |
| 153 | IPI00892604 | 1 | 51.4 | 0.53 | 0.08 | 12 | 7 | C4B Complement component C4B | GLESQTK                        | 2 | 521.7982  | 1.768 | 0.194 |
| 153 | IPI00892604 | 1 | 51.4 | 0.53 | 0.08 | 12 | 7 | C4B Complement component C4B | n[145]ILTVPGHLDQMQLDIQAR       | 3 | 731.7321  | 3.846 | 0.231 |
| 153 | IPI00892604 | 1 | 51.4 | 0.53 | 0.08 | 12 | 7 | C4B Complement component C4B | n[145]MRPSTDTITVM[147]VENSHGLR | 4 | 576.7944  | 2.715 | 0.134 |
| 153 | IPI00892604 | 1 | 51.4 | 0.53 | 0.08 | 12 | 7 | C4B Complement component C4B | DHAVDLIQK                      | 3 | 440.2541  | 2.889 | 0.044 |
| 153 | IPI00892604 | 1 | 51.4 | 0.53 | 0.08 | 12 | 7 | C4B Complement component C4B | AVGSGATFSH                     | 2 | 537.2724  | 3.193 | 0.45  |
| 153 | IPI00892604 | 1 | 51.4 | 0.53 | 0.08 | 12 | 7 | C4B Complement component C4B | n[145]EFHLHLR                  | 3 | 365.8775  | 2.519 | 0.041 |
| 153 | IPI00892604 | 1 | 51.4 | 0.53 | 0.08 | 12 | 7 | C4B Complement component C4B | n[145]FGLLEDGK[272]            | 2 | 641.3501  | 2.202 | 0.081 |
| 153 | IPI00892604 | 1 | 51.4 | 0.53 | 0.08 | 12 | 7 | C4B Complement component C4B | n[145]GSFQDLSPVIHR             | 2 | 750.408   | 4.043 | 0.353 |
| 153 | IPI00892604 | 1 | 51.4 | 0.53 | 0.08 | 12 | 7 | C4B Complement component C4B | n[145]DK[272]GQAGLQR           | 2 | 630.8668  | 2.384 | 0.214 |
| 153 | IPI00892604 | 1 | 51.4 | 0.53 | 0.08 | 12 | 7 | C4B Complement component C4B | n[145]LFETK[272]               | 2 | 463.2835  | 1.994 | 0.166 |
| 153 | IPI00892604 | 1 | 51.4 | 0.53 | 0.08 | 12 | 7 | C4B Complement component C4B | n[145]PVQGVAYVR                | 2 | 566.8334  | 3.358 | 0.382 |
| 153 | IPI00892604 | 1 | 51.4 | 0.53 | 0.08 | 12 | 7 | C4B Complement component C4B | n[145]YIYGK[272]PVQGVAY        | 2 | 823.4633  | 3.385 | 0.399 |
| 153 | IPI00892604 | 1 | 51.4 | 0.53 | 0.08 | 12 | 7 | C4B Complement component C4B | n[145]AVGSGATFSHYYY            | 2 | 783.8709  | 3.188 | 0.505 |
| 153 | IPI00892604 | 1 | 51.4 | 0.53 | 0.08 | 12 | 7 | C4B Complement component C4B | n[145]AVGSGATFSH               | 2 | 539.2759  | 2.899 | 0.417 |
| 153 | IPI00892604 | 1 | 51.4 | 0.53 | 0.08 | 12 | 7 | C4B Complement component C4B | n[145]CCQDGVTR                 | 2 | 559.2226  | 1.446 | 0.03  |
| 153 | IPI00892604 | 1 | 51.4 | 0.53 | 0.08 | 12 | 7 | C4B Complement component C4B | IFETK                          | 2 | 459.2764  | 1.916 | 0.139 |
| 153 | IPI00892604 | 1 | 51.4 | 0.53 | 0.08 | 12 | 7 | C4B Complement component C4B | VFALDQK                        | 2 | 550.8268  | 1.851 | 0.074 |
| 153 | IPI00892604 | 1 | 51.4 | 0.53 | 0.08 | 12 | 7 | C4B Complement component C4B | YIYGKPVQGVAY                   | 2 | 819.4562  | 3.234 | 0.414 |
| 153 | IPI00892604 | 1 | 51.4 | 0.53 | 0.08 | 12 | 7 | C4B Complement component C4B | YIYGKPVQGVAYVR                 | 3 | 631.6964  | 2.829 | 0.034 |
| 153 | IPI00892604 | 1 | 51.4 | 0.53 | 0.08 | 12 | 7 | C4B Complement component C4B | FGLLEDGKKTFFR                  | 4 | 524.0441  | 2.773 | 0.093 |
| 153 | IPI00892604 | 1 | 51.4 | 0.53 | 0.08 | 12 | 7 | C4B Complement component C4B | AEM[147]ADQAAAWLTR             | 2 | 795.3907  | 2.504 | 0.016 |
| 153 | IPI00892604 | 1 | 51.4 | 0.53 | 0.08 | 12 | 7 | C4B Complement component C4B | n[145]HLVPGAPFLLQALVR          | 2 | 888.0443  | 1.687 | 0.195 |
| 153 | IPI00892604 | 1 | 51.4 | 0.53 | 0.08 | 12 | 7 | C4B Complement component C4B | n[145]AVGSGATFSHYYYM[147]IL    | 2 | 970.4727  | 2.976 | 0.414 |
| 153 | IPI00892604 | 1 | 51.4 | 0.53 | 0.08 | 12 | 7 | C4B Complement component C4B | AVGSGATFSHYYY                  | 2 | 781.8674  | 2.367 | 0.416 |
| 153 | IPI00892604 | 1 | 51.4 | 0.53 | 0.08 | 12 | 7 | C4B Complement component C4B | n[145]ACYYPR                   | 2 | 481.7209  | 2.41  | 0.292 |
| 153 | IPI00892604 | 1 | 51.4 | 0.53 | 0.08 | 12 | 7 | C4B Complement component C4B | ADLEK                          | 2 | 428.2504  | 1.732 | 0.017 |
| 153 | IPI00892604 | 1 | 51.4 | 0.53 | 0.08 | 12 | 7 | C4B Complement component C4B | DFALLSLQVPLK                   | 3 | 541.9993  | 2.954 | 0.027 |

|     |             |   |      |      |      |    |   |                              |                               |   |          |       |       |
|-----|-------------|---|------|------|------|----|---|------------------------------|-------------------------------|---|----------|-------|-------|
| 153 | IPI00892604 | 1 | 51.4 | 0.53 | 0.08 | 12 | 7 | C4B Complement component C4B | n[145]AIADVTLISGFHALR         | 2 | 864.4999 | 3.688 | 0.454 |
| 153 | IPI00892604 | 1 | 51.4 | 0.53 | 0.08 | 12 | 7 | C4B Complement component C4B | n[145]HLVPGAPF                | 2 | 491.2856 | 1.528 | 0.243 |
| 153 | IPI00892604 | 1 | 51.4 | 0.53 | 0.08 | 12 | 7 | C4B Complement component C4B | AVGSGATFSHYYYM[147]IL         | 2 | 968.4691 | 2.455 | 0.488 |
| 153 | IPI00892604 | 1 | 51.4 | 0.53 | 0.08 | 12 | 7 | C4B Complement component C4B | n[145]HLVPGAPFLLQAL           | 2 | 760.4595 | 3.069 | 0.309 |
| 153 | IPI00892604 | 1 | 51.4 | 0.53 | 0.08 | 12 | 7 | C4B Complement component C4B | ALLHLLLHEGK                   | 2 | 762.4747 | 3.934 | 0.398 |
| 153 | IPI00892604 | 1 | 51.4 | 0.53 | 0.08 | 12 | 7 | C4B Complement component C4B | n[145]ALLHLLLHEGK[272]        | 2 | 766.4818 | 3.347 | 0.41  |
| 153 | IPI00892604 | 1 | 51.4 | 0.53 | 0.08 | 12 | 7 | C4B Complement component C4B | n[145]ASAGLLGAH               | 2 | 470.7703 | 2.721 | 0.275 |
| 153 | IPI00892604 | 1 | 51.4 | 0.53 | 0.08 | 12 | 7 | C4B Complement component C4B | n[145]LLLHEGK[272]            | 3 | 366.5689 | 2.178 | 0.215 |
| 153 | IPI00892604 | 1 | 51.4 | 0.53 | 0.08 | 12 | 7 | C4B Complement component C4B | n[145]YYHGDHPVANSLR           | 3 | 558.2819 | 2.468 | 0.251 |
| 153 | IPI00892604 | 1 | 51.4 | 0.53 | 0.08 | 12 | 7 | C4B Complement component C4B | n[145]GSFQDLSPIHR             | 3 | 500.6077 | 2.748 | 0.189 |
| 153 | IPI00892604 | 1 | 51.4 | 0.53 | 0.08 | 12 | 7 | C4B Complement component C4B | AVGSGATFSHY                   | 2 | 700.3357 | 2.46  | 0.338 |
| 153 | IPI00892604 | 1 | 51.4 | 0.53 | 0.08 | 12 | 7 | C4B Complement component C4B | n[145]EVQLVAHSPWLK[272]       | 2 | 847.9953 | 4.232 | 0.215 |
| 153 | IPI00892604 | 1 | 51.4 | 0.53 | 0.08 | 12 | 7 | C4B Complement component C4B | GPEVQLVAHSPWLK[272]           | 2 | 923.0288 | 3.57  | 0.337 |
| 153 | IPI00892604 | 1 | 51.4 | 0.53 | 0.08 | 12 | 7 | C4B Complement component C4B | n[145]DGSYAAWLSR              | 2 | 635.3209 | 2.097 | 0.306 |
| 153 | IPI00892604 | 1 | 51.4 | 0.53 | 0.08 | 12 | 7 | C4B Complement component C4B | LLLHEGK                       | 3 | 363.8975 | 2.328 | 0.183 |
| 153 | IPI00892604 | 1 | 51.4 | 0.53 | 0.08 | 12 | 7 | C4B Complement component C4B | HLVPGAPFLLQ                   | 2 | 666.3954 | 2.52  | 0.362 |
| 153 | IPI00892604 | 1 | 51.4 | 0.53 | 0.08 | 12 | 7 | C4B Complement component C4B | n[145]DFALLSLQVPLK[272]       | 3 | 544.6707 | 2.364 | 0.024 |
| 153 | IPI00892604 | 1 | 51.4 | 0.53 | 0.08 | 12 | 7 | C4B Complement component C4B | n[145]SVGVQLQDVPR             | 2 | 671.384  | 3.329 | 0.196 |
| 153 | IPI00892604 | 1 | 51.4 | 0.53 | 0.08 | 12 | 7 | C4B Complement component C4B | LSCPK                         | 2 | 437.2379 | 1.377 | 0.033 |
| 153 | IPI00892604 | 1 | 51.4 | 0.53 | 0.08 | 12 | 7 | C4B Complement component C4B | ASAGLLGAH                     | 2 | 468.7667 | 2.087 | 0.309 |
| 153 | IPI00892604 | 1 | 51.4 | 0.53 | 0.08 | 12 | 7 | C4B Complement component C4B | HLVPGAPFLLQA                  | 2 | 701.9139 | 2.071 | 0.363 |
| 153 | IPI00892604 | 1 | 51.4 | 0.53 | 0.08 | 12 | 7 | C4B Complement component C4B | n[145]YLAPTLAASR              | 2 | 660.3938 | 2.653 | 0.274 |
| 153 | IPI00892604 | 1 | 51.4 | 0.53 | 0.08 | 12 | 7 | C4B Complement component C4B | EVQLVAHSPWLK[272]             | 3 | 564.3302 | 3.088 | 0.226 |
| 153 | IPI00892604 | 1 | 51.4 | 0.53 | 0.08 | 12 | 7 | C4B Complement component C4B | EVQLVAHSPWLK                  | 2 | 843.9882 | 4.102 | 0.246 |
| 153 | IPI00892604 | 1 | 51.4 | 0.53 | 0.08 | 12 | 7 | C4B Complement component C4B | n[145]ASAGLLGAHAAAITA         | 2 | 719.9104 | 2.703 | 0.233 |
| 153 | IPI00892604 | 1 | 51.4 | 0.53 | 0.08 | 12 | 7 | C4B Complement component C4B | n[145]GLESQTK[272]            | 2 | 525.8053 | 1.587 | 0.027 |
| 153 | IPI00892604 | 1 | 51.4 | 0.53 | 0.08 | 12 | 7 | C4B Complement component C4B | n[145]HLVPGAPFLLQA            | 2 | 703.9175 | 2.43  | 0.235 |
| 153 | IPI00892604 | 1 | 51.4 | 0.53 | 0.08 | 12 | 7 | C4B Complement component C4B | n[145]CYYP                    | 2 | 446.2023 | 1.893 | 0.223 |
| 153 | IPI00892604 | 1 | 51.4 | 0.53 | 0.08 | 12 | 7 | C4B Complement component C4B | n[145]DHAVDLIQK[272]GYM[147]R | 3 | 617.3326 | 2.33  | 0.111 |
| 153 | IPI00892604 | 1 | 51.4 | 0.53 | 0.08 | 12 | 7 | C4B Complement component C4B | n[145]ALTLTK[272]             | 2 | 467.8124 | 2.063 | 0.195 |
| 153 | IPI00892604 | 1 | 51.4 | 0.53 | 0.08 | 12 | 7 | C4B Complement component C4B | n[145]LLLHEGK[272]            | 2 | 549.3497 | 2.055 | 0.216 |
| 153 | IPI00892604 | 1 | 51.4 | 0.53 | 0.08 | 12 | 7 | C4B Complement component C4B | LLLHEGK                       | 2 | 545.3426 | 2.273 | 0.165 |
| 153 | IPI00892604 | 1 | 51.4 | 0.53 | 0.08 | 12 | 7 | C4B Complement component C4B | n[145]LLLFSPSVVHL             | 2 | 684.9222 | 3.02  | 0.269 |
| 153 | IPI00892604 | 1 | 51.4 | 0.53 | 0.08 | 12 | 7 | C4B Complement component C4B | n[145]LLLFSPSVVH              | 2 | 628.3802 | 2.685 | 0.21  |
| 153 | IPI00892604 | 1 | 51.4 | 0.53 | 0.08 | 12 | 7 | C4B Complement component C4B | YLAPTLAASR                    | 2 | 658.3903 | 2.453 | 0.254 |
| 153 | IPI00892604 | 1 | 51.4 | 0.53 | 0.08 | 12 | 7 | C4B Complement component C4B | n[145]LLQALVR                 | 2 | 478.8223 | 2.929 | 0.141 |
| 153 | IPI00892604 | 1 | 51.4 | 0.53 | 0.08 | 12 | 7 | C4B Complement component C4B | n[145]LTVAAPPSSGGPGFLSIERPD   | 3 | 709.0518 | 2.138 | 0.292 |
| 153 | IPI00892604 | 1 | 51.4 | 0.53 | 0.08 | 12 | 7 | C4B Complement component C4B | n[145]PNMIPDGFNSYVR           | 2 | 884.9259 | 2.47  | 0.185 |
| 153 | IPI00892604 | 1 | 51.4 | 0.53 | 0.08 | 12 | 7 | C4B Complement component C4B | n[145]HLVPGAPFLLQ             | 2 | 668.3989 | 2.165 | 0.178 |
| 153 | IPI00892604 | 1 | 51.4 | 0.53 | 0.08 | 12 | 7 | C4B Complement component C4B | LSGM[147]AIADVTLISGFHALR      | 3 | 710.0576 | 3.096 | 0.102 |
| 153 | IPI00892604 | 1 | 51.4 | 0.53 | 0.08 | 12 | 7 | C4B Complement component C4B | ALTLTK                        | 2 | 463.8053 | 2.316 | 0.037 |
| 153 | IPI00892604 | 1 | 51.4 | 0.53 | 0.08 | 12 | 7 | C4B Complement component C4B | ALLHLLLHEGK                   | 3 | 508.6522 | 3.208 | 0.027 |
| 153 | IPI00892604 | 1 | 51.4 | 0.53 | 0.08 | 12 | 7 | C4B Complement component C4B | n[145]DDFVIPDISEPGTWK[272]    | 4 | 502.5133 | 2.753 | 0.113 |
| 153 | IPI00892604 | 1 | 51.4 | 0.53 | 0.08 | 12 | 7 | C4B Complement component C4B | n[145]LLLFSPSVVHLG            | 2 | 713.433  | 2.199 | 0.322 |
| 153 | IPI00892604 | 1 | 51.4 | 0.53 | 0.08 | 12 | 7 | C4B Complement component C4B | LAPTLAASR                     | 2 | 520.3166 | 1.803 | 0.107 |
| 153 | IPI00892604 | 1 | 51.4 | 0.53 | 0.08 | 12 | 7 | C4B Complement component C4B | n[145]GVAHNNLM[147]AM[147]    | 2 | 617.2955 | 1.583 | 0.15  |
| 153 | IPI00892604 | 1 | 51.4 | 0.53 | 0.08 | 12 | 7 | C4B Complement component C4B | n[145]ITQVLH                  | 2 | 427.7645 | 1.675 | 0.067 |
| 153 | IPI00892604 | 1 | 51.4 | 0.53 | 0.08 | 12 | 7 | C4B Complement component C4B | n[145]LAPTLAASR               | 2 | 522.3201 | 1.986 | 0.042 |

|     |             |   |      |      |      |    |   |                              |                                     |   |           |       |       |
|-----|-------------|---|------|------|------|----|---|------------------------------|-------------------------------------|---|-----------|-------|-------|
| 153 | IPI00892604 | 1 | 51.4 | 0.53 | 0.08 | 12 | 7 | C4B Complement component C4B | n[145]HLVPGAPFL                     | 2 | 604.3696  | 1.739 | 0.11  |
| 153 | IPI00892604 | 1 | 51.4 | 0.53 | 0.08 | 12 | 7 | C4B Complement component C4B | EVQLVAHSPWLK[272]                   | 2 | 845.9917  | 3.805 | 0.254 |
| 153 | IPI00892604 | 1 | 51.4 | 0.53 | 0.08 | 12 | 7 | C4B Complement component C4B | n[145]FNYSYVR                       | 2 | 465.2517  | 1.541 | 0.064 |
| 153 | IPI00892604 | 1 | 51.4 | 0.53 | 0.08 | 12 | 7 | C4B Complement component C4B | LTVAAPPSSGGPGFLSIER                 | 3 | 637.0229  | 3.062 | 0.261 |
| 153 | IPI00892604 | 1 | 51.4 | 0.53 | 0.08 | 12 | 7 | C4B Complement component C4B | SVK[272]                            | 1 | 617.4104  | 0.88  | 0.378 |
| 154 | IPI00894122 | 1 | 52.1 | 0.89 | 0.01 | 4  | 4 | APOB APOB protein            | GNVATEISTER                         | 2 | 658.8439  | 3.649 | 0.443 |
| 154 | IPI00894122 | 1 | 52.1 | 0.89 | 0.01 | 4  | 4 | APOB APOB protein            | KGNVATEISTER                        | 2 | 792.9389  | 4.231 | 0.48  |
| 154 | IPI00894122 | 1 | 52.1 | 0.89 | 0.01 | 4  | 4 | APOB APOB protein            | NSEEFAAAMSR                         | 2 | 676.8168  | 3.568 | 0.463 |
| 154 | IPI00894122 | 1 | 52.1 | 0.89 | 0.01 | 4  | 4 | APOB APOB protein            | TKNSEEFAAAM[147]SR                  | 2 | 869.4331  | 3.669 | 0.494 |
| 154 | IPI00894122 | 1 | 52.1 | 0.89 | 0.01 | 4  | 4 | APOB APOB protein            | VLVDHFGYTK                          | 2 | 729.9089  | 4.134 | 0.517 |
| 154 | IPI00894122 | 1 | 52.1 | 0.89 | 0.01 | 4  | 4 | APOB APOB protein            | n[145]EQHLFLPFSYK[272]              | 2 | 848.9687  | 4.402 | 0.386 |
| 154 | IPI00894122 | 1 | 52.1 | 0.89 | 0.01 | 4  | 4 | APOB APOB protein            | n[145]GFPTLEALFGK[272]              | 2 | 798.9475  | 4.344 | 0.474 |
| 154 | IPI00894122 | 1 | 52.1 | 0.89 | 0.01 | 4  | 4 | APOB APOB protein            | n[145]NSEEFAAAM[147]SR              | 2 | 686.8178  | 3.694 | 0.466 |
| 154 | IPI00894122 | 1 | 52.1 | 0.89 | 0.01 | 4  | 4 | APOB APOB protein            | n[145]TK[272]NSEEFAAAM[147]SR       | 2 | 873.4402  | 3.187 | 0.546 |
| 154 | IPI00894122 | 1 | 52.1 | 0.89 | 0.01 | 4  | 4 | APOB APOB protein            | n[145]VLVDHFGYTK[272]               | 2 | 733.916   | 3.578 | 0.49  |
| 154 | IPI00894122 | 1 | 52.1 | 0.89 | 0.01 | 4  | 4 | APOB APOB protein            | n[145]YTYNYEAESSGVPGTADSR           | 2 | 1149.5176 | 6.378 | 0.589 |
| 154 | IPI00894122 | 1 | 52.1 | 0.89 | 0.01 | 4  | 4 | APOB APOB protein            | DKDQEVLLQTFLLDASPDKR                | 3 | 937.4943  | 3.571 | 0.507 |
| 154 | IPI00894122 | 1 | 52.1 | 0.89 | 0.01 | 4  | 4 | APOB APOB protein            | KGNVATEISTER                        | 3 | 528.9617  | 4.645 | 0.413 |
| 154 | IPI00894122 | 1 | 52.1 | 0.89 | 0.01 | 4  | 4 | APOB APOB protein            | KLTISEQNIQR                         | 3 | 537.3177  | 2.091 | 0.229 |
| 154 | IPI00894122 | 1 | 52.1 | 0.89 | 0.01 | 4  | 4 | APOB APOB protein            | KM[147]GLAFESTK                     | 3 | 516.6253  | 3.103 | 0.375 |
| 154 | IPI00894122 | 1 | 52.1 | 0.89 | 0.01 | 4  | 4 | APOB APOB protein            | KYTYNYEAESSGVPGTADSR                | 3 | 854.7418  | 4.207 | 0.361 |
| 154 | IPI00894122 | 1 | 52.1 | 0.89 | 0.01 | 4  | 4 | APOB APOB protein            | ILGEELGFASLHDLQLLGK                 | 3 | 778.4458  | 6.146 | 0.581 |
| 154 | IPI00894122 | 1 | 52.1 | 0.89 | 0.01 | 4  | 4 | APOB APOB protein            | NKYGM[147]VAQVTQTLK                 | 3 | 673.047   | 4.326 | 0.415 |
| 154 | IPI00894122 | 1 | 52.1 | 0.89 | 0.01 | 4  | 4 | APOB APOB protein            | QVFLYPEKDEPTYILNIK                  | 3 | 877.4913  | 5.05  | 0.47  |
| 154 | IPI00894122 | 1 | 52.1 | 0.89 | 0.01 | 4  | 4 | APOB APOB protein            | QVFLYPEKDEPTYILNIKR                 | 3 | 929.525   | 4.681 | 0.468 |
| 154 | IPI00894122 | 1 | 52.1 | 0.89 | 0.01 | 4  | 4 | APOB APOB protein            | TSQCTLKEVYGFNPEGK                   | 3 | 789.7327  | 5.047 | 0.45  |
| 154 | IPI00894122 | 1 | 52.1 | 0.89 | 0.01 | 4  | 4 | APOB APOB protein            | VLVDHFGYTK                          | 3 | 486.9417  | 2.617 | 0.145 |
| 154 | IPI00894122 | 1 | 52.1 | 0.89 | 0.01 | 4  | 4 | APOB APOB protein            | n[145]NK[272]YGM[147]VAQVTQTLK[272] | 3 | 677.0541  | 4.763 | 0.466 |
| 154 | IPI00894122 | 1 | 52.1 | 0.89 | 0.01 | 4  | 4 | APOB APOB protein            | n[145]QVFLYPEK[272]DEPTYILNIK[272]  | 3 | 881.4984  | 4.386 | 0.416 |
| 154 | IPI00894122 | 1 | 52.1 | 0.89 | 0.01 | 4  | 4 | APOB APOB protein            | n[145]TK[272]NSEEFAAAM[147]SR       | 3 | 582.6292  | 4.825 | 0.439 |
| 154 | IPI00894122 | 1 | 52.1 | 0.89 | 0.01 | 4  | 4 | APOB APOB protein            | DKDQEVLLQTFLLDASPDKR                | 4 | 703.3726  | 4.134 | 0.508 |
| 154 | IPI00894122 | 1 | 52.1 | 0.89 | 0.01 | 4  | 4 | APOB APOB protein            | QVFLYPEKDEPTYILNIKR                 | 4 | 697.3956  | 3.337 | 0.305 |
| 154 | IPI00894122 | 1 | 52.1 | 0.89 | 0.01 | 4  | 4 | APOB APOB protein            | n[145]QVFLYPEK[272]DEPTYILNIK[272]R | 4 | 700.4009  | 4.749 | 0.499 |
| 154 | IPI00894122 | 1 | 52.1 | 0.89 | 0.01 | 4  | 4 | APOB APOB protein            | GFPTLEALFGK                         | 2 | 794.9404  | 3.631 | 0.434 |
| 154 | IPI00894122 | 1 | 52.1 | 0.89 | 0.01 | 4  | 4 | APOB APOB protein            | n[145]QGFPPDSVKN[272]               | 2 | 713.8821  | 3.574 | 0.335 |
| 154 | IPI00894122 | 1 | 52.1 | 0.89 | 0.01 | 4  | 4 | APOB APOB protein            | EQHLFLPFSYK                         | 3 | 563.6435  | 3.969 | 0.286 |
| 154 | IPI00894122 | 1 | 52.1 | 0.89 | 0.01 | 4  | 4 | APOB APOB protein            | STSPPKQAEAVLK                       | 3 | 592.6841  | 3.349 | 0.342 |
| 154 | IPI00894122 | 1 | 52.1 | 0.89 | 0.01 | 4  | 4 | APOB APOB protein            | TKNSEEFAAAM[147]SR                  | 3 | 579.9578  | 3.608 | 0.358 |
| 154 | IPI00894122 | 1 | 52.1 | 0.89 | 0.01 | 4  | 4 | APOB APOB protein            | n[145]FFGEGTK[272]K[272]            | 3 | 449.2662  | 2.616 | 0.357 |
| 154 | IPI00894122 | 1 | 52.1 | 0.89 | 0.01 | 4  | 4 | APOB APOB protein            | n[145]ILGEELGFASLHDLQLLGK[272]      | 3 | 781.1172  | 3.059 | 0.318 |
| 154 | IPI00894122 | 1 | 52.1 | 0.89 | 0.01 | 4  | 4 | APOB APOB protein            | n[145]QVFLYPEK[272]DEPTYILNIK[272]R | 3 | 933.5321  | 4.364 | 0.342 |
| 154 | IPI00894122 | 1 | 52.1 | 0.89 | 0.01 | 4  | 4 | APOB APOB protein            | n[145]STSPPK[272]QAEAVLK[272]       | 3 | 596.6912  | 2.72  | 0.044 |
| 154 | IPI00894122 | 1 | 52.1 | 0.89 | 0.01 | 4  | 4 | APOB APOB protein            | n[145]VLVDHFGYTK[272]               | 3 | 489.6131  | 1.98  | 0.076 |
| 154 | IPI00894122 | 1 | 52.1 | 0.89 | 0.01 | 4  | 4 | APOB APOB protein            | KLTISEQNIQR                         | 2 | 805.4729  | 3.461 | 0.406 |
| 154 | IPI00894122 | 1 | 52.1 | 0.89 | 0.01 | 4  | 4 | APOB APOB protein            | MGLAFESTK                           | 2 | 632.342   | 3     | 0.397 |
| 154 | IPI00894122 | 1 | 52.1 | 0.89 | 0.01 | 4  | 4 | APOB APOB protein            | SVSLPSLDPASAK                       | 2 | 776.4407  | 3.38  | 0.189 |
| 154 | IPI00894122 | 1 | 52.1 | 0.89 | 0.01 | 4  | 4 | APOB APOB protein            | n[145]LAAYLM[147]LM[147]R           | 2 | 629.3444  | 2.395 | 0.372 |
| 154 | IPI00894122 | 1 | 52.1 | 0.89 | 0.01 | 4  | 4 | APOB APOB protein            | n[145]SVSLPSLDPASAK[272]            | 2 | 780.4478  | 3.103 | 0.09  |

|     |             |   |      |      |      |   |   |                   |                                         |   |           |       |       |
|-----|-------------|---|------|------|------|---|---|-------------------|-----------------------------------------|---|-----------|-------|-------|
| 154 | IPI00894122 | 1 | 52.1 | 0.89 | 0.01 | 4 | 4 | APOB APOB protein | n[145]CVQSTK[272]PSLM[147]IQK[272]      | 3 | 653.0264  | 2.76  | 0.273 |
| 154 | IPI00894122 | 1 | 52.1 | 0.89 | 0.01 | 4 | 4 | APOB APOB protein | HVAEAICK                                | 2 | 598.8176  | 3.014 | 0.372 |
| 154 | IPI00894122 | 1 | 52.1 | 0.89 | 0.01 | 4 | 4 | APOB APOB protein | QGFFPDSVNK                              | 2 | 709.875   | 3.353 | 0.37  |
| 154 | IPI00894122 | 1 | 52.1 | 0.89 | 0.01 | 4 | 4 | APOB APOB protein | TGISPLALIK                              | 2 | 646.9187  | 3.34  | 0.295 |
| 154 | IPI00894122 | 1 | 52.1 | 0.89 | 0.01 | 4 | 4 | APOB APOB protein | n[145]NSEEFAAAMSR                       | 2 | 678.8204  | 3.733 | 0.309 |
| 154 | IPI00894122 | 1 | 52.1 | 0.89 | 0.01 | 4 | 4 | APOB APOB protein | n[145]SPSQADINK[272]                    | 2 | 624.3454  | 3.905 | 0.214 |
| 154 | IPI00894122 | 1 | 52.1 | 0.89 | 0.01 | 4 | 4 | APOB APOB protein | n[145]TGISPLALIK[272]                   | 2 | 650.9258  | 3.718 | 0.363 |
| 154 | IPI00894122 | 1 | 52.1 | 0.89 | 0.01 | 4 | 4 | APOB APOB protein | EQHLFLPFSYK                             | 2 | 844.9616  | 2.892 | 0.404 |
| 154 | IPI00894122 | 1 | 52.1 | 0.89 | 0.01 | 4 | 4 | APOB APOB protein | NSEEFAAAM[147]SR                        | 2 | 684.8143  | 3.185 | 0.395 |
| 154 | IPI00894122 | 1 | 52.1 | 0.89 | 0.01 | 4 | 4 | APOB APOB protein | n[145]HVAEAICK[272]                     | 2 | 602.8247  | 2.907 | 0.329 |
| 154 | IPI00894122 | 1 | 52.1 | 0.89 | 0.01 | 4 | 4 | APOB APOB protein | n[145]IEGNLIFDPNNYLPK[272]              | 2 | 1018.0588 | 2.363 | 0.27  |
| 154 | IPI00894122 | 1 | 52.1 | 0.89 | 0.01 | 4 | 4 | APOB APOB protein | n[145]ANLFNK[272]LVTELR                 | 3 | 569.345   | 2.717 | 0.309 |
| 154 | IPI00894122 | 1 | 52.1 | 0.89 | 0.01 | 4 | 4 | APOB APOB protein | n[145]LTISEQNIQR                        | 2 | 673.3815  | 3.436 | 0.212 |
| 154 | IPI00894122 | 1 | 52.1 | 0.89 | 0.01 | 4 | 4 | APOB APOB protein | n[145]MGLAFESTK[272]                    | 2 | 636.3491  | 1.653 | 0.178 |
| 154 | IPI00894122 | 1 | 52.1 | 0.89 | 0.01 | 4 | 4 | APOB APOB protein | n[145]DDK[272]HEQDMVNGIM[147]LSVEK[272] | 3 | 846.0965  | 3.136 | 0.28  |
| 154 | IPI00894122 | 1 | 52.1 | 0.89 | 0.01 | 4 | 4 | APOB APOB protein | M[147]GLAFESTK                          | 2 | 640.3394  | 2.501 | 0.282 |
| 154 | IPI00894122 | 1 | 52.1 | 0.89 | 0.01 | 4 | 4 | APOB APOB protein | QAEAVLK                                 | 2 | 519.819   | 2.581 | 0.242 |
| 154 | IPI00894122 | 1 | 52.1 | 0.89 | 0.01 | 4 | 4 | APOB APOB protein | n[145]GNVATEISTER                       | 2 | 660.8474  | 3.534 | 0.321 |
| 154 | IPI00894122 | 1 | 52.1 | 0.89 | 0.01 | 4 | 4 | APOB APOB protein | n[145]QAEAVLK[272]                      | 2 | 523.8261  | 2.561 | 0.223 |
| 154 | IPI00894122 | 1 | 52.1 | 0.89 | 0.01 | 4 | 4 | APOB APOB protein | n[145]FFGEGTK[272]                      | 2 | 537.2972  | 2.293 | 0.228 |
| 154 | IPI00894122 | 1 | 52.1 | 0.89 | 0.01 | 4 | 4 | APOB APOB protein | LTISEQNIQR                              | 2 | 671.3779  | 3.166 | 0.137 |
| 154 | IPI00894122 | 1 | 52.1 | 0.89 | 0.01 | 4 | 4 | APOB APOB protein | n[145]EIFNMAR                           | 2 | 512.772   | 2.305 | 0.191 |
| 154 | IPI00894122 | 1 | 52.1 | 0.89 | 0.01 | 4 | 4 | APOB APOB protein | EVYGFNPEGK                              | 2 | 710.367   | 2.774 | 0.194 |
| 154 | IPI00894122 | 1 | 52.1 | 0.89 | 0.01 | 4 | 4 | APOB APOB protein | n[145]NYQLYK[272]                       | 2 | 558.8183  | 2.13  | 0.218 |
| 154 | IPI00894122 | 1 | 52.1 | 0.89 | 0.01 | 4 | 4 | APOB APOB protein | n[145]LAIPEGK[272]                      | 2 | 508.3232  | 2.195 | 0.235 |
| 154 | IPI00894122 | 1 | 52.1 | 0.89 | 0.01 | 4 | 4 | APOB APOB protein | n[145]ESQLPTVM[147]DFR                  | 2 | 741.8726  | 2.63  | 0.182 |
| 154 | IPI00894122 | 1 | 52.1 | 0.89 | 0.01 | 4 | 4 | APOB APOB protein | n[145]EVYGFNPEGK[272]                   | 2 | 714.3741  | 2.975 | 0.14  |
| 154 | IPI00894122 | 1 | 52.1 | 0.89 | 0.01 | 4 | 4 | APOB APOB protein | FFGEGTK                                 | 2 | 533.2901  | 2.14  | 0.191 |
| 154 | IPI00894122 | 1 | 52.1 | 0.89 | 0.01 | 4 | 4 | APOB APOB protein | LAIPEGK                                 | 2 | 504.3161  | 2.626 | 0.1   |
| 154 | IPI00894122 | 1 | 52.1 | 0.89 | 0.01 | 4 | 4 | APOB APOB protein | n[145]DLGQCDR                           | 2 | 498.7216  | 2.179 | 0.167 |
| 154 | IPI00894122 | 1 | 52.1 | 0.89 | 0.01 | 4 | 4 | APOB APOB protein | n[145]TLQELK[272]K[272]                 | 2 | 646.4192  | 2.349 | 0.01  |
| 154 | IPI00894122 | 1 | 52.1 | 0.89 | 0.01 | 4 | 4 | APOB APOB protein | n[145]SK[272]EVPEAR                     | 3 | 401.9027  | 2.821 | 0.112 |
| 154 | IPI00894122 | 1 | 52.1 | 0.89 | 0.01 | 4 | 4 | APOB APOB protein | DLGQCDR                                 | 2 | 496.7181  | 1.967 | 0.133 |
| 154 | IPI00894122 | 1 | 52.1 | 0.89 | 0.01 | 4 | 4 | APOB APOB protein | NYQLYK                                  | 2 | 554.8112  | 1.753 | 0.125 |
| 154 | IPI00894122 | 1 | 52.1 | 0.89 | 0.01 | 4 | 4 | APOB APOB protein | IEGNLIFDPNNYLPK                         | 2 | 1014.0517 | 2.112 | 0.102 |
| 154 | IPI00894122 | 1 | 52.1 | 0.89 | 0.01 | 4 | 4 | APOB APOB protein | n[145]LEDTPK[272]                       | 2 | 495.7892  | 2.092 | 0.064 |
| 154 | IPI00894122 | 1 | 52.1 | 0.89 | 0.01 | 4 | 4 | APOB APOB protein | n[145]SK[272]EVPEAR                     | 2 | 602.3504  | 2.183 | 0.282 |
| 154 | IPI00894122 | 1 | 52.1 | 0.89 | 0.01 | 4 | 4 | APOB APOB protein | LVTELR                                  | 2 | 435.774   | 2.059 | 0.15  |
| 154 | IPI00894122 | 1 | 52.1 | 0.89 | 0.01 | 4 | 4 | APOB APOB protein | SPSQADINK                               | 2 | 620.3383  | 3.167 | 0.238 |
| 154 | IPI00894122 | 1 | 52.1 | 0.89 | 0.01 | 4 | 4 | APOB APOB protein | n[145]EEEMLENVSLVCPK[272]               | 2 | 977.4823  | 4.208 | 0.351 |
| 154 | IPI00894122 | 1 | 52.1 | 0.89 | 0.01 | 4 | 4 | APOB APOB protein | CVQSTKPSLM[147]IQK                      | 3 | 649.0193  | 2.691 | 0.076 |
| 154 | IPI00894122 | 1 | 52.1 | 0.89 | 0.01 | 4 | 4 | APOB APOB protein | n[145]TSQCTLK                           | 2 | 555.792   | 1.863 | 0.032 |
| 154 | IPI00894122 | 1 | 52.1 | 0.89 | 0.01 | 4 | 4 | APOB APOB protein | LAAYLM[147]LM[147]R                     | 2 | 627.3409  | 1.722 | 0.048 |
| 154 | IPI00894122 | 1 | 52.1 | 0.89 | 0.01 | 4 | 4 | APOB APOB protein | DDKHEQDM[147]VNGIM[147]LSVEK            | 3 | 847.421   | 2.89  | 0.106 |
| 154 | IPI00894122 | 1 | 52.1 | 0.89 | 0.01 | 4 | 4 | APOB APOB protein | n[145]ALYWVNGQVPDGVSK[272]              | 3 | 641.0189  | 3.123 | 0.043 |
| 154 | IPI00894122 | 1 | 52.1 | 0.89 | 0.01 | 4 | 4 | APOB APOB protein | EEEMLENVSLVCPK                          | 2 | 973.4752  | 3.33  | 0.434 |
| 154 | IPI00894122 | 1 | 52.1 | 0.89 | 0.01 | 4 | 4 | APOB APOB protein | n[145]ATLYALSH                          | 2 | 510.2858  | 2.74  | 0.27  |
| 154 | IPI00894122 | 1 | 52.1 | 0.89 | 0.01 | 4 | 4 | APOB APOB protein | n[145]EQHLFLPFSYK[272]                  | 3 | 566.3149  | 2.044 | 0.048 |

|     |                |   |      |      |      |    |    |                   |                                    |   |           |       |       |
|-----|----------------|---|------|------|------|----|----|-------------------|------------------------------------|---|-----------|-------|-------|
| 154 | IPI00894122    | 1 | 52.1 | 0.89 | 0.01 | 4  | 4  | APOB APOB protein | ATLYALSH                           | 2 | 508.2822  | 3.065 | 0.218 |
| 154 | IPI00894122    | 1 | 52.1 | 0.89 | 0.01 | 4  | 4  | APOB APOB protein | FFGEGTKK                           | 3 | 445.2591  | 1.762 | 0.109 |
| 154 | IPI00894122    | 1 | 52.1 | 0.89 | 0.01 | 4  | 4  | APOB APOB protein | SKEVPEAR                           | 2 | 598.3433  | 1.844 | 0.155 |
| 154 | IPI00894122    | 1 | 52.1 | 0.89 | 0.01 | 4  | 4  | APOB APOB protein | SKEVPEAR                           | 3 | 399.2313  | 2.434 | 0.047 |
| 154 | IPI00894122    | 1 | 52.1 | 0.89 | 0.01 | 4  | 4  | APOB APOB protein | n[145]EEEM[147]LENVSLVCPK[272]     | 2 | 985.4798  | 3.986 | 0.414 |
| 154 | IPI00894122    | 1 | 52.1 | 0.89 | 0.01 | 4  | 4  | APOB APOB protein | n[145]AYLM[147]LM[147]R            | 2 | 537.2838  | 2.319 | 0.279 |
| 154 | IPI00894122    | 1 | 52.1 | 0.89 | 0.01 | 4  | 4  | APOB APOB protein | EEEM[147]LENVSLVCPK                | 2 | 981.4727  | 2.402 | 0.241 |
| 154 | IPI00894122    | 1 | 52.1 | 0.89 | 0.01 | 4  | 4  | APOB APOB protein | SVSLPSLDPASAK                      | 3 | 517.9629  | 2.004 | 0.003 |
| 154 | IPI00894122    | 1 | 52.1 | 0.89 | 0.01 | 4  | 4  | APOB APOB protein | n[145]QVFLYPEK[272]DEPTYILNIK[272] | 4 | 661.3756  | 2.866 | 0.043 |
| 154 | IPI00894122    | 1 | 52.1 | 0.89 | 0.01 | 4  | 4  | APOB APOB protein | n[145]SQADINK[272]                 | 2 | 532.303   | 1.904 | 0.19  |
| 154 | IPI00894122    | 1 | 52.1 | 0.89 | 0.01 | 4  | 4  | APOB APOB protein | TKNSEEFAAAMSR                      | 3 | 574.6262  | 2.263 | 0.018 |
| 154 | IPI00894122    | 1 | 52.1 | 0.89 | 0.01 | 4  | 4  | APOB APOB protein | AYLM[147]LM[147]R                  | 2 | 535.2803  | 2.007 | 0.139 |
| 154 | IPI00894122    | 1 | 52.1 | 0.89 | 0.01 | 4  | 4  | APOB APOB protein | n[145]NFVASHIAN                    | 2 | 558.7996  | 2.175 | 0.234 |
| 154 | IPI00894122    | 1 | 52.1 | 0.89 | 0.01 | 4  | 4  | APOB APOB protein | n[145]VLVDHFG                      | 2 | 465.7619  | 1.4   | 0.109 |
| 155 | Trypa5 PromTA  | 1 | 100  | 7.25 | 3.16 | 13 | 5  |                   | LGEHNIDVLEGNEQFIN                  | 2 | 1041.0186 | 3.842 | 0.484 |
| 155 | Trypa5 PromTA  | 1 | 100  | 7.25 | 3.16 | 13 | 5  |                   | LGEHNIDVLEGNEQFINAARI              | 2 | 1246.6483 | 5.866 | 0.412 |
| 155 | Trypa5 PromTA  | 1 | 100  | 7.25 | 3.16 | 13 | 5  |                   | LGEHNIDVLEGNEQFINAARI              | 3 | 831.4346  | 5.699 | 0.468 |
| 155 | Trypa5 PromTA  | 1 | 100  | 7.25 | 3.16 | 13 | 5  |                   | LSSPATLNSR                         | 2 | 593.333   | 2.68  | 0.163 |
| 155 | Trypa5 PromTA  | 1 | 100  | 7.25 | 3.16 | 13 | 5  |                   | IITHPNFNGNTLDNDIMLIRL              | 3 | 855.46    | 4.571 | 0.415 |
| 155 | Trypa5 PromTA  | 1 | 100  | 7.25 | 3.16 | 13 | 5  |                   | n[145]LGEHNIDVLEGNEQFINAAR         | 3 | 795.0756  | 4.17  | 0.324 |
| 155 | Trypa5 PromTA  | 1 | 100  | 7.25 | 3.16 | 13 | 5  |                   | n[145]LSSPATLNSR                   | 2 | 595.3365  | 2.256 | 0.182 |
| 155 | Trypa5 PromTA  | 1 | 100  | 7.25 | 3.16 | 13 | 5  |                   | IITHPNFNGNTLDNDIM[147]LIRL         | 3 | 860.7916  | 4.917 | 0.404 |
| 155 | Trypa5 PromTA  | 1 | 100  | 7.25 | 3.16 | 13 | 5  |                   | IITHPNFNGN                         | 2 | 633.8331  | 2.738 | 0.385 |
| 155 | Trypa5 PromTA  | 1 | 100  | 7.25 | 3.16 | 13 | 5  |                   | n[145]IITHPNFNGN                   | 2 | 635.8367  | 3.182 | 0.296 |
| 155 | Trypa5 PromTA  | 1 | 100  | 7.25 | 3.16 | 13 | 5  |                   | n[145]LGEHNIDVLEGNEQFIN            | 2 | 1043.0221 | 4.559 | 0.292 |
| 155 | Trypa5 PromTA  | 1 | 100  | 7.25 | 3.16 | 13 | 5  |                   | IITHPNFNG                          | 2 | 576.8117  | 2.015 | 0.207 |
| 155 | Trypa5 PromTA  | 1 | 100  | 7.25 | 3.16 | 13 | 5  |                   | n[145]LGEHNIDVLEGNEQ               | 2 | 855.9244  | 3.136 | 0.289 |
| 155 | Trypa5 PromTA  | 1 | 100  | 7.25 | 3.16 | 13 | 5  |                   | n[145]IITHPN                       | 2 | 419.7488  | 1.648 | 0.267 |
| 155 | Trypa5 PromTA  | 1 | 100  | 7.25 | 3.16 | 13 | 5  |                   | IITHPNFN                           | 2 | 548.3009  | 2.141 | 0.14  |
| 155 | Trypa5 PromTA  | 1 | 100  | 7.25 | 3.16 | 13 | 5  |                   | n[145]IITHPNFN                     | 2 | 550.3045  | 2.019 | 0.122 |
| 155 | Trypa5 PromTA  | 1 | 100  | 7.25 | 3.16 | 13 | 5  |                   | n[145]IITHPNFNGNTLD                | 2 | 800.416   | 2.367 | 0.171 |
| 155 | Trypa5 PromTA  | 1 | 100  | 7.25 | 3.16 | 13 | 5  |                   | IITHPN                             | 2 | 417.7453  | 1.522 | 0.113 |
| 155 | Trypa5 PromTA  | 1 | 100  | 7.25 | 3.16 | 13 | 5  |                   | LSSPATLN                           | 1 | 942.5255  | 1.542 | 0.3   |
| 155 | Trypa5 PromTA  | 1 | 100  | 7.25 | 3.16 | 13 | 5  |                   | n[145]SSPATLNSR                    | 2 | 538.7945  | 2.045 | 0.016 |
| 155 | Trypa5 PromTA  | 1 | 100  | 7.25 | 3.16 | 13 | 5  |                   | n[145]IITHPNFNG                    | 2 | 578.8152  | 1.145 | 0.193 |
| 155 | Trypa5 PromTA  | 1 | 100  | 7.25 | 3.16 | 13 | 5  |                   | n[145]LSSPATLN                     | 1 | 946.5326  | 1.639 | 0.276 |
| 156 | gi 113574 sp P | 1 | 23.7 | 1.35 | 0.32 | 39 | 11 |                   | CCTESLVNR                          | 1 | 1256.5255 | 2.625 | 0.448 |
| 156 | gi 113574 sp P | 1 | 23.7 | 1.35 | 0.32 | 39 | 11 |                   | n[145]CCTESLVNR                    | 1 | 1260.5326 | 3.271 | 0.418 |
| 156 | gi 113574 sp P | 1 | 23.7 | 1.35 | 0.32 | 39 | 11 |                   | CCTESLVNR                          | 2 | 628.7664  | 2.692 | 0.374 |
| 156 | gi 113574 sp P | 1 | 23.7 | 1.35 | 0.32 | 39 | 11 |                   | KVPQVSTPTLVEVSR                    | 2 | 960.5675  | 3.012 | 0.399 |
| 156 | gi 113574 sp P | 1 | 23.7 | 1.35 | 0.32 | 39 | 11 |                   | VPQVSTPTLVEVSR                     | 2 | 826.4725  | 2.141 | 0.242 |
| 156 | gi 113574 sp P | 1 | 23.7 | 1.35 | 0.32 | 39 | 11 |                   | KVPQVSTPTLVEVSR                    | 3 | 640.7141  | 2.558 | 0.274 |
| 156 | gi 113574 sp P | 1 | 23.7 | 1.35 | 0.32 | 39 | 11 |                   | KYLYEIAR                           | 3 | 445.931   | 2.961 | 0.374 |
| 156 | gi 113574 sp P | 1 | 23.7 | 1.35 | 0.32 | 39 | 11 |                   | n[145]CCTESLVNR                    | 2 | 630.7699  | 3.019 | 0.386 |
| 156 | gi 113574 sp P | 1 | 23.7 | 1.35 | 0.32 | 39 | 11 |                   | n[145]LVNELTEFAK[272]              | 2 | 726.4211  | 2.988 | 0.274 |
| 156 | gi 113574 sp P | 1 | 23.7 | 1.35 | 0.32 | 39 | 11 |                   | LVNELTEFAK                         | 2 | 722.414   | 3.313 | 0.308 |
| 156 | gi 113574 sp P | 1 | 23.7 | 1.35 | 0.32 | 39 | 11 |                   | KQTALVELLK                         | 3 | 521.6713  | 1.714 | 0.005 |
| 156 | gi 113574 sp P | 1 | 23.7 | 1.35 | 0.32 | 39 | 11 |                   | YLYEIAR                            | 2 | 534.2979  | 2.505 | 0.117 |

|     |                |   |      |      |      |    |    |  |                            |   |           |       |       |
|-----|----------------|---|------|------|------|----|----|--|----------------------------|---|-----------|-------|-------|
| 156 | gi 113574 sp P | 1 | 23.7 | 1.35 | 0.32 | 39 | 11 |  | YLVEIAR                    | 1 | 1067.5885 | 2.485 | 0.127 |
| 156 | gi 113574 sp P | 1 | 23.7 | 1.35 | 0.32 | 39 | 11 |  | n[145]YLVEIAR              | 1 | 1071.5956 | 2.423 | 0.119 |
| 156 | gi 113574 sp P | 1 | 23.7 | 1.35 | 0.32 | 39 | 11 |  | n[145]DLGEEQFK[272]        | 2 | 627.3345  | 1.947 | 0.047 |
| 156 | gi 113574 sp P | 1 | 23.7 | 1.35 | 0.32 | 39 | 11 |  | n[145]LVTDLTK[272]         | 2 | 539.3416  | 1.491 | 0.104 |
| 156 | gi 113574 sp P | 1 | 23.7 | 1.35 | 0.32 | 39 | 11 |  | LVTDLTK                    | 1 | 1069.6617 | 2.119 | 0.085 |
| 156 | gi 113574 sp P | 1 | 23.7 | 1.35 | 0.32 | 39 | 11 |  | LVTDLTK                    | 2 | 535.3345  | 2.415 | 0.102 |
| 156 | gi 113574 sp P | 1 | 23.7 | 1.35 | 0.32 | 39 | 11 |  | n[145]LVTDLTK[272]         | 1 | 1077.6759 | 1.923 | 0.042 |
| 156 | gi 113574 sp P | 1 | 23.7 | 1.35 | 0.32 | 39 | 11 |  | n[145]YLVEIAR              | 2 | 536.3014  | 1.823 | 0.031 |
| 156 | gi 113574 sp P | 1 | 23.7 | 1.35 | 0.32 | 39 | 11 |  | n[145]FK[272]DLGEEQFK[272] | 3 | 558.3139  | 3.045 | 0.179 |
| 156 | gi 113574 sp P | 1 | 23.7 | 1.35 | 0.32 | 39 | 11 |  | DLGEEQFK                   | 2 | 623.3274  | 2.108 | 0.077 |
| 156 | gi 113574 sp P | 1 | 23.7 | 1.35 | 0.32 | 39 | 11 |  | AWSVAR                     | 2 | 415.2376  | 2.019 | 0.07  |
| 156 | gi 113574 sp P | 1 | 23.7 | 1.35 | 0.32 | 39 | 11 |  | n[145]CASIQK[272]          | 2 | 492.2665  | 1.47  | 0.143 |
| 156 | gi 113574 sp P | 1 | 23.7 | 1.35 | 0.32 | 39 | 11 |  | ADIAK                      | 2 | 399.2477  | 1.927 | 0.203 |
| 156 | gi 113574 sp P | 1 | 23.7 | 1.35 | 0.32 | 39 | 11 |  | CASIQK                     | 2 | 488.2594  | 1.741 | 0.13  |
| 156 | gi 113574 sp P | 1 | 23.7 | 1.35 | 0.32 | 39 | 11 |  | n[145]CTESLVNR             | 2 | 556.2715  | 1.944 | 0.168 |
| 156 | gi 113574 sp P | 1 | 23.7 | 1.35 | 0.32 | 39 | 11 |  | FKDLGEEQFK                 | 3 | 554.3068  | 2.251 | 0.074 |
| 156 | gi 113574 sp P | 1 | 23.7 | 1.35 | 0.32 | 39 | 11 |  | GACLLPK                    | 2 | 514.2932  | 2.195 | 0.008 |
| 156 | gi 113574 sp P | 1 | 23.7 | 1.35 | 0.32 | 39 | 11 |  | QVSTPTLVEVSR               | 2 | 728.4119  | 2.45  | 0.147 |
| 156 | gi 113574 sp P | 1 | 23.7 | 1.35 | 0.32 | 39 | 11 |  | KYLYEVAR                   | 2 | 668.3928  | 2.621 | 0.313 |
| 156 | gi 113574 sp P | 1 | 23.7 | 1.35 | 0.32 | 39 | 11 |  | DVCK                       | 2 | 395.7012  | 1.198 | 0.182 |
| 156 | gi 113574 sp P | 1 | 23.7 | 1.35 | 0.32 | 39 | 11 |  | n[145]QVSTPTLVEVSR         | 2 | 730.4155  | 2.58  | 0.171 |
| 156 | gi 113574 sp P | 1 | 23.7 | 1.35 | 0.32 | 39 | 11 |  | RHPYFYAPPELL               | 2 | 773.4143  | 2.366 | 0.06  |
| 156 | gi 113574 sp P | 1 | 23.7 | 1.35 | 0.32 | 39 | 11 |  | n[145]CVLHEK[272]          | 2 | 531.7876  | 2.428 | 0.209 |
| 156 | gi 113574 sp P | 1 | 23.7 | 1.35 | 0.32 | 39 | 11 |  | HPYFYAPPELL                | 2 | 695.3637  | 2.509 | 0.257 |
| 156 | gi 113574 sp P | 1 | 23.7 | 1.35 | 0.32 | 39 | 11 |  | HPYFYAPPELL                | 2 | 638.8217  | 1.934 | 0.114 |
| 156 | gi 113574 sp P | 1 | 23.7 | 1.35 | 0.32 | 39 | 11 |  | KQTALVELLK                 | 2 | 782.0033  | 2.027 | 0.066 |
| 156 | gi 113574 sp P | 1 | 23.7 | 1.35 | 0.32 | 39 | 11 |  | CVLHEK                     | 2 | 527.7805  | 2.238 | 0.165 |
| 156 | gi 113574 sp P | 1 | 23.7 | 1.35 | 0.32 | 39 | 11 |  | FQNALIVR                   | 2 | 550.8324  | 3.137 | 0.218 |
| 156 | gi 113574 sp P | 1 | 23.7 | 1.35 | 0.32 | 39 | 11 |  | KVPQVSTPTLV                | 2 | 724.9454  | 2.074 | 0.255 |
| 156 | gi 113574 sp P | 1 | 23.7 | 1.35 | 0.32 | 39 | 11 |  | KVPQVSTPTLVEV              | 2 | 839.0009  | 2.257 | 0.265 |
| 156 | gi 113574 sp P | 1 | 23.7 | 1.35 | 0.32 | 39 | 11 |  | TESLVNR                    | 2 | 479.7695  | 2.317 | 0.127 |
| 156 | gi 113574 sp P | 1 | 23.7 | 1.35 | 0.32 | 39 | 11 |  | ETYVPK                     | 2 | 508.7924  | 2.07  | 0.15  |
| 156 | gi 113574 sp P | 1 | 23.7 | 1.35 | 0.32 | 39 | 11 |  | n[145]LLECADDR             | 2 | 562.7635  | 2.137 | 0.129 |
| 156 | gi 113574 sp P | 1 | 23.7 | 1.35 | 0.32 | 39 | 11 |  | VSTPTLVEVSR                | 2 | 664.3827  | 2.392 | 0.141 |
| 156 | gi 113574 sp P | 1 | 23.7 | 1.35 | 0.32 | 39 | 11 |  | n[145]FQNALIVR             | 2 | 552.836   | 2.972 | 0.193 |
| 156 | gi 113574 sp P | 1 | 23.7 | 1.35 | 0.32 | 39 | 11 |  | n[145]RHPYFYAPPELL         | 2 | 718.8758  | 2.125 | 0.089 |
| 156 | gi 113574 sp P | 1 | 23.7 | 1.35 | 0.32 | 39 | 11 |  | PLLEK                      | 2 | 440.2868  | 1.519 | 0.055 |
| 156 | gi 113574 sp P | 1 | 23.7 | 1.35 | 0.32 | 39 | 11 |  | RHPYFYAPPELL               | 2 | 716.8723  | 2.058 | 0.158 |
| 156 | gi 113574 sp P | 1 | 23.7 | 1.35 | 0.32 | 39 | 11 |  | KPLLEK                     | 3 | 383.2569  | 2.599 | 0.063 |
| 156 | gi 113574 sp P | 1 | 23.7 | 1.35 | 0.32 | 39 | 11 |  | n[145]VTDLTK[272]          | 2 | 482.7995  | 2.013 | 0.049 |
| 156 | gi 113574 sp P | 1 | 23.7 | 1.35 | 0.32 | 39 | 11 |  | n[145]JYEVAR               | 2 | 454.7697  | 2.144 | 0.122 |
| 156 | gi 113574 sp P | 1 | 23.7 | 1.35 | 0.32 | 39 | 11 |  | KVPQVSTPTLVEVS             | 2 | 882.517   | 2.651 | 0.424 |
| 156 | gi 113574 sp P | 1 | 23.7 | 1.35 | 0.32 | 39 | 11 |  | n[145]PLLEK[272]           | 2 | 444.2939  | 1.942 | 0     |
| 156 | gi 113574 sp P | 1 | 23.7 | 1.35 | 0.32 | 39 | 11 |  | RPCFSAL                    | 2 | 490.2462  | 1.689 | 0.117 |
| 156 | gi 113574 sp P | 1 | 23.7 | 1.35 | 0.32 | 39 | 11 |  | n[145]FQNALIVR             | 1 | 1104.6647 | 2.248 | 0.187 |
| 156 | gi 113574 sp P | 1 | 23.7 | 1.35 | 0.32 | 39 | 11 |  | ALIVR                      | 2 | 356.2474  | 1.693 | 0.002 |
| 157 | gi 136429 sp P | 1 | 34.6 | 0.92 | 0.08 | 61 | 30 |  | LGHEHNIDVLEGNEQFIN         | 2 | 1041.0186 | 3.842 | 0.484 |
| 157 | gi 136429 sp P | 1 | 34.6 | 0.92 | 0.08 | 61 | 30 |  | LGHEHNIDVLEGNEQFINAAK      | 2 | 1246.1507 | 6.144 | 0.496 |

|     |                  |        |      |      |      |    |    |                           |                                      |   |           |       |       |
|-----|------------------|--------|------|------|------|----|----|---------------------------|--------------------------------------|---|-----------|-------|-------|
| 157 | gi 136429 sp P   | 1      | 34.6 | 0.92 | 0.08 | 61 | 30 |                           | IITHPNFNGNTLDNDIM[147]LIK            | 2 | 1290.1862 | 4.83  | 0.566 |
| 157 | gi 136429 sp P   | 1      | 34.6 | 0.92 | 0.08 | 61 | 30 |                           | n[145]LGEHNIDVLEGNEQFINAAK[272]      | 2 | 1250.1578 | 6.109 | 0.487 |
| 157 | gi 136429 sp P   | 1      | 34.6 | 0.92 | 0.08 | 61 | 30 |                           | n[145]IITHPNFNGNTLDNDIMLIK[272]      | 2 | 1286.1958 | 4.412 | 0.558 |
| 157 | gi 136429 sp P   | 1      | 34.6 | 0.92 | 0.08 | 61 | 30 |                           | n[145]IITHPNFNGNTLDNDIM[147]LIK[272] | 2 | 1294.1933 | 4.503 | 0.562 |
| 157 | gi 136429 sp P   | 1      | 34.6 | 0.92 | 0.08 | 61 | 30 |                           | LGEHNIDVLEGNEQFINAAK                 | 3 | 831.1029  | 6.369 | 0.494 |
| 157 | gi 136429 sp P   | 1      | 34.6 | 0.92 | 0.08 | 61 | 30 |                           | IITHPNFNGNTLDNDIMLIK                 | 3 | 855.1282  | 2.71  | 0.297 |
| 157 | gi 136429 sp P   | 1      | 34.6 | 0.92 | 0.08 | 61 | 30 |                           | IITHPNFNGNTLDNDIM[147]LIK            | 3 | 860.4599  | 4.422 | 0.287 |
| 157 | gi 136429 sp P   | 1      | 34.6 | 0.92 | 0.08 | 61 | 30 |                           | n[145]LGEHNIDVLEGNEQFINAAK[272]      | 3 | 833.7743  | 6.943 | 0.319 |
| 157 | gi 136429 sp P   | 1      | 34.6 | 0.92 | 0.08 | 61 | 30 |                           | n[145]IITHPNFNGNTLDNDIMLIK[272]      | 3 | 857.7996  | 6.747 | 0.56  |
| 157 | gi 136429 sp P   | 1      | 34.6 | 0.92 | 0.08 | 61 | 30 |                           | n[145]IITHPNFNGNTLDNDIM[147]LIK[272] | 3 | 863.1313  | 2.288 | 0.017 |
| 157 | gi 136429 sp P   | 1      | 34.6 | 0.92 | 0.08 | 61 | 30 |                           | LGEHNIDVLEGNEQFINAAK                 | 4 | 623.579   | 3.098 | 0.277 |
| 157 | gi 136429 sp P   | 1      | 34.6 | 0.92 | 0.08 | 61 | 30 |                           | VATVSLPR                             | 2 | 491.8059  | 1.302 | 0.217 |
| 157 | gi 136429 sp P   | 1      | 34.6 | 0.92 | 0.08 | 61 | 30 |                           | n[145]VATVSLPR                       | 2 | 493.8094  | 2.148 | 0.174 |
| 157 | gi 136429 sp P   | 1      | 34.6 | 0.92 | 0.08 | 61 | 30 |                           | NKPGVYTK                             | 3 | 442.9346  | 2.869 | 0.197 |
| 157 | gi 136429 sp P   | 1      | 34.6 | 0.92 | 0.08 | 61 | 30 |                           | n[145]NK[272]PGVYTK[272]             | 3 | 446.9417  | 2.284 | 0.241 |
| 157 | gi 136429 sp P   | 1      | 34.6 | 0.92 | 0.08 | 61 | 30 |                           | LSSPATLNSR                           | 2 | 593.333   | 2.68  | 0.163 |
| 157 | gi 136429 sp P   | 1      | 34.6 | 0.92 | 0.08 | 61 | 30 |                           | n[145]NK[272]PGVYTK[272]             | 2 | 669.909   | 2.625 | 0.204 |
| 157 | gi 136429 sp P   | 1      | 34.6 | 0.92 | 0.08 | 61 | 30 |                           | SSGSSYPSLLQCLK                       | 2 | 898.4577  | 2.31  | 0.268 |
| 157 | gi 136429 sp P   | 1      | 34.6 | 0.92 | 0.08 | 61 | 30 |                           | n[145]LSSPATLNSR                     | 2 | 595.3365  | 2.256 | 0.182 |
| 157 | gi 136429 sp P   | 1      | 34.6 | 0.92 | 0.08 | 61 | 30 |                           | NKPGVYTK                             | 2 | 663.8983  | 2.102 | 0.174 |
| 157 | gi 136429 sp P   | 1      | 34.6 | 0.92 | 0.08 | 61 | 30 |                           | IITHPNFNGN                           | 2 | 633.8331  | 2.738 | 0.385 |
| 157 | gi 136429 sp P   | 1      | 34.6 | 0.92 | 0.08 | 61 | 30 |                           | n[145]IITHPNFNGN                     | 2 | 635.8367  | 3.182 | 0.296 |
| 157 | gi 136429 sp P   | 1      | 34.6 | 0.92 | 0.08 | 61 | 30 |                           | n[145]LGEHNIDVLEGNEQFIN              | 2 | 1043.0221 | 4.559 | 0.292 |
| 157 | gi 136429 sp P   | 1      | 34.6 | 0.92 | 0.08 | 61 | 30 |                           | IITHPNFNGNTLDNDIMLIK                 | 4 | 641.598   | 2.179 | 0.01  |
| 157 | gi 136429 sp P   | 1      | 34.6 | 0.92 | 0.08 | 61 | 30 |                           | IITHPNFNG                            | 2 | 576.8117  | 2.015 | 0.207 |
| 157 | gi 136429 sp P   | 1      | 34.6 | 0.92 | 0.08 | 61 | 30 |                           | n[145]LGEHNIDVLEGNEQ                 | 2 | 855.9244  | 3.136 | 0.289 |
| 157 | gi 136429 sp P   | 1      | 34.6 | 0.92 | 0.08 | 61 | 30 |                           | n[145]IITHPN                         | 2 | 419.7488  | 1.648 | 0.267 |
| 157 | gi 136429 sp P   | 1      | 34.6 | 0.92 | 0.08 | 61 | 30 |                           | TLNDNDIMLIK                          | 2 | 728.4157  | 3.628 | 0.324 |
| 157 | gi 136429 sp P   | 1      | 34.6 | 0.92 | 0.08 | 61 | 30 |                           | IITHPNFN                             | 2 | 548.3009  | 2.141 | 0.14  |
| 157 | gi 136429 sp P   | 1      | 34.6 | 0.92 | 0.08 | 61 | 30 |                           | n[145]IITHPNFN                       | 2 | 550.3045  | 2.019 | 0.122 |
| 157 | gi 136429 sp P   | 1      | 34.6 | 0.92 | 0.08 | 61 | 30 |                           | n[145]TLNDNDIM[147]LIK[272]          | 2 | 740.4202  | 2.934 | 0.251 |
| 157 | gi 136429 sp P   | 1      | 34.6 | 0.92 | 0.08 | 61 | 30 |                           | n[145]IITHPNFNGNTLD                  | 2 | 800.416   | 2.367 | 0.171 |
| 157 | gi 136429 sp P   | 1      | 34.6 | 0.92 | 0.08 | 61 | 30 |                           | n[145]TVSLPR                         | 2 | 408.7566  | 2.007 | 0.09  |
| 157 | gi 136429 sp P   | 1      | 34.6 | 0.92 | 0.08 | 61 | 30 |                           | IITHPN                               | 2 | 417.7453  | 1.522 | 0.113 |
| 157 | gi 136429 sp P   | 1      | 34.6 | 0.92 | 0.08 | 61 | 30 |                           | LSSPATLN                             | 1 | 942.5255  | 1.542 | 0.3   |
| 157 | gi 136429 sp P   | 1      | 34.6 | 0.92 | 0.08 | 61 | 30 |                           | n[145]SSPATLNSR                      | 2 | 538.7945  | 2.045 | 0.016 |
| 157 | gi 136429 sp P   | 1      | 34.6 | 0.92 | 0.08 | 61 | 30 |                           | n[145]IITHPNFNG                      | 2 | 578.8152  | 1.145 | 0.193 |
| 157 | gi 136429 sp P   | 1      | 34.6 | 0.92 | 0.08 | 61 | 30 |                           | n[145]LSSPATLN                       | 1 | 946.5326  | 1.639 | 0.276 |
| 158 | gi 71536 pir  KF | 1      | 6.9  | 1.81 | 0.67 | 6  | 6  |                           | SEIDNVKK                             | 3 | 451.6014  | 3.001 | 0.334 |
| 158 | gi 71536 pir  KF | 1      | 6.9  | 1.81 | 0.67 | 6  | 6  |                           | n[145]DVDGAYM[147]TK[272]            | 2 | 652.3258  | 2.767 | 0.294 |
| 158 | gi 71536 pir  KF | 1      | 6.9  | 1.81 | 0.67 | 6  | 6  |                           | DVDGAYM[147]TK                       | 2 | 648.3187  | 2.857 | 0.22  |
| 158 | gi 71536 pir  KF | 1      | 6.9  | 1.81 | 0.67 | 6  | 6  |                           | n[145]YEDEINK[272]R                  | 3 | 452.245   | 2.209 | 0.161 |
| 158 | gi 71536 pir  KF | 1      | 6.9  | 1.81 | 0.67 | 6  | 6  |                           | AQYEDIAQK                            | 2 | 673.3592  | 2.645 | 0.041 |
| 158 | gi 71536 pir  KF | 1      | 6.9  | 1.81 | 0.67 | 6  | 6  |                           | n[145]SEIDNVK[272]K[272]             | 3 | 455.6085  | 2.233 | 0.027 |
| 158 | gi 71536 pir  KF | 1      | 6.9  | 1.81 | 0.67 | 6  | 6  |                           | IDNVKK                               | 2 | 568.8612  | 2.026 | 0.076 |
| 158 | gi 71536 pir  KF | 1      | 6.9  | 1.81 | 0.67 | 6  | 6  |                           | IDNVK                                | 2 | 434.7662  | 1.944 | 0.066 |
| 159 | IPI00011694      | 0.9999 | 11.3 | 0.78 | 0.12 | 2  | 2  | PRSS1 Trypsin-1 precursor | LGEHNIEVLEGNEQFINAAK                 | 3 | 835.7747  | 4.736 | 0.39  |
| 159 | IPI00011694      | 0.9999 | 11.3 | 0.78 | 0.12 | 2  | 2  | PRSS1 Trypsin-1 precursor | NKPGVYTK                             | 3 | 442.9346  | 2.869 | 0.197 |

|     |                |        |      |      |      |   |   |                                                            |                                  |   |          |       |       |
|-----|----------------|--------|------|------|------|---|---|------------------------------------------------------------|----------------------------------|---|----------|-------|-------|
| 159 | IPI00011694    | 0.9999 | 11.3 | 0.78 | 0.12 | 2 | 2 | PRSS1 Trypsin-1 precursor                                  | n[145]NK[272]PGVYTK[272]         | 3 | 446.9417 | 2.284 | 0.241 |
| 159 | IPI00011694    | 0.9999 | 11.3 | 0.78 | 0.12 | 2 | 2 | PRSS1 Trypsin-1 precursor                                  | n[145]NK[272]PGVYTK[272]         | 2 | 669.909  | 2.625 | 0.204 |
| 159 | IPI00011694    | 0.9999 | 11.3 | 0.78 | 0.12 | 2 | 2 | PRSS1 Trypsin-1 precursor                                  | n[145]LGEHNIIEVLEGNEQFINAAK[272] | 3 | 838.4461 | 4.24  | 0.264 |
| 159 | IPI00011694    | 0.9999 | 11.3 | 0.78 | 0.12 | 2 | 2 | PRSS1 Trypsin-1 precursor                                  | NKPGVYTK                         | 2 | 663.8983 | 2.102 | 0.174 |
| 160 | IPI00168728    | 0.9999 | 3.2  | 0.57 | 0.02 | 2 | 2 | IGHM FLJ00385 protein (Fragment)                           | n[145]TPLGDTTHTCPR               | 3 | 496.9067 | 2.644 | 0.357 |
| 160 | IPI00168728    | 0.9999 | 3.2  | 0.57 | 0.02 | 2 | 2 | IGHM FLJ00385 protein (Fragment)                           | n[145]TPLGDTTHTCPR               | 2 | 744.8564 | 2.091 | 0.184 |
| 161 | IPI00063523    | 0.9998 | 1.2  | 0.65 | 0    | 2 | 2 | FLJ40176 Conserved hypothetical protein                    | ALHLQEEK                         | 2 | 624.359  | 2.594 | 0.14  |
| 161 | IPI00063523    | 0.9998 | 1.2  | 0.65 | 0    | 2 | 2 | FLJ40176 Conserved hypothetical protein                    | n[145]ALHLQEEK[272]              | 2 | 628.3661 | 2.578 | 0.143 |
| 161 | IPI00063523    | 0.9998 | 1.2  | 0.65 | 0    | 2 | 2 | FLJ40176 Conserved hypothetical protein                    | SK[272]K[272]                    | 2 | 395.7731 | 0.913 | 0.136 |
| 161 | IPI00063523    | 0.9998 | 1.2  | 0.65 | 0    | 2 | 2 | FLJ40176 Conserved hypothetical protein                    | SVK[272]                         | 1 | 617.4104 | 0.88  | 0.378 |
| 162 | IPI00171678    | 0.9998 | 4.8  | 5.21 | 6.97 | 4 | 2 | DBH Dopamine beta-hydroxylase                              | n[145]LEVHYHNPLVIEGR             | 3 | 607.336  | 3.52  | 0.257 |
| 162 | IPI00171678    | 0.9998 | 4.8  | 5.21 | 6.97 | 4 | 2 | DBH Dopamine beta-hydroxylase                              | n[145]TPEGLTLLFK[272]            | 2 | 703.9285 | 2.298 | 0.122 |
| 162 | IPI00171678    | 0.9998 | 4.8  | 5.21 | 6.97 | 4 | 2 | DBH Dopamine beta-hydroxylase                              | LEEPT                            | 2 | 364.6949 | 1.495 | 0.082 |
| 163 | IPI00439446    | 0.9998 | 5.5  | 2.61 | 1.87 | 3 | 2 | MAN1A1 MAN1A1 protein                                      | n[145]HEFEEAK[272]               | 2 | 589.3082 | 2.111 | 0.212 |
| 163 | IPI00439446    | 0.9998 | 5.5  | 2.61 | 1.87 | 3 | 2 | MAN1A1 MAN1A1 protein                                      | n[145]JGGLLEHK[272]              | 2 | 521.3184 | 2.435 | 0.063 |
| 163 | IPI00439446    | 0.9998 | 5.5  | 2.61 | 1.87 | 3 | 2 | MAN1A1 MAN1A1 protein                                      | FDGGVEAIATRQNEK                  | 3 | 639.0059 | 1.933 | 0.056 |
| 163 | IPI00439446    | 0.9998 | 5.5  | 2.61 | 1.87 | 3 | 2 | MAN1A1 MAN1A1 protein                                      | EM[147]K                         | 1 | 703.3808 | 1.121 | 0.072 |
| 163 | IPI00439446    | 0.9998 | 5.5  | 2.61 | 1.87 | 3 | 2 | MAN1A1 MAN1A1 protein                                      | YILR                             | 2 | 352.7263 | 1.622 | 0.012 |
| 164 | IPI00412492    | 0.9996 | 0.6  | 0.73 | 0.03 | 7 | 2 | PLXND1 Isoform 1 of Plexin-D1 precursor                    | n[145]EIPEYRK[272]               | 3 | 408.2393 | 2.148 | 0.035 |
| 164 | IPI00412492    | 0.9996 | 0.6  | 0.73 | 0.03 | 7 | 2 | PLXND1 Isoform 1 of Plexin-D1 precursor                    | EIPEYRK                          | 3 | 405.5679 | 2.036 | 0.061 |
| 164 | IPI00412492    | 0.9996 | 0.6  | 0.73 | 0.03 | 7 | 2 | PLXND1 Isoform 1 of Plexin-D1 precursor                    | YILR                             | 2 | 352.7263 | 1.622 | 0.012 |
| 165 | IPI00328765    | 0.9995 | 7.4  | 0.81 | 0.02 | 3 | 3 | PIBF1 Isoform 1 of Progesterone-induced-blocking factor 1  | VLQLEK                           | 2 | 505.3239 | 2.639 | 0.029 |
| 165 | IPI00328765    | 0.9995 | 7.4  | 0.81 | 0.02 | 3 | 3 | PIBF1 Isoform 1 of Progesterone-induced-blocking factor 1  | n[145]VLQLEK[272]                | 2 | 509.331  | 2.26  | 0.039 |
| 165 | IPI00328765    | 0.9995 | 7.4  | 0.81 | 0.02 | 3 | 3 | PIBF1 Isoform 1 of Progesterone-induced-blocking factor 1  | n[145]QTQQPYR                    | 2 | 532.7839 | 2.248 | 0.137 |
| 165 | IPI00328765    | 0.9995 | 7.4  | 0.81 | 0.02 | 3 | 3 | PIBF1 Isoform 1 of Progesterone-induced-blocking factor 1  | SK[272]K[272]                    | 2 | 395.7731 | 0.913 | 0.136 |
| 166 | IPI00431645    | 0.9995 | 3.2  | 0.65 | 0    | 3 | 2 | HP HP protein                                              | n[145]ILGGHLDK[272]              | 3 | 404.5832 | 2.622 | 0.139 |
| 166 | IPI00431645    | 0.9995 | 3.2  | 0.65 | 0    | 3 | 2 | HP HP protein                                              | ILGGHLDK                         | 3 | 401.9118 | 2.614 | 0.074 |
| 167 | gi 547749 sp P | 0.9993 | 5.2  | 1.19 | 0.06 | 2 | 2 | KRT10 Keratin                                              | n[145]ALEESNYELEGK[272]          | 2 | 835.4298 | 5.194 | 0.465 |
| 167 | gi 547749 sp P | 0.9993 | 5.2  | 1.19 | 0.06 | 2 | 2 | KRT10 Keratin                                              | n[145]SLLEGEGSSGGGGR             | 2 | 703.8533 | 2.937 | 0.026 |
| 167 | gi 547749 sp P | 0.9993 | 5.2  | 1.19 | 0.06 | 2 | 2 | KRT10 Keratin                                              | EM[147]K                         | 1 | 703.3808 | 1.121 | 0.072 |
| 168 | IPI00301143    | 0.9993 | 5.2  | 0.8  | 0    | 2 | 2 | PI16 Isoform 1 of Peptidase inhibitor 16 precursor         | n[145]AQVSPTASDM[147]LHM[147]R   | 3 | 573.9473 | 3.873 | 0.383 |
| 168 | IPI00301143    | 0.9993 | 5.2  | 0.8  | 0    | 2 | 2 | PI16 Isoform 1 of Peptidase inhibitor 16 precursor         | AQVSPTASDM[147]LHM[147]R         | 3 | 572.6116 | 2.36  | 0.108 |
| 169 | IPI00004373    | 0.9989 | 10.1 | 1.03 | 0.04 | 2 | 2 | MBL2 Mannose-binding protein C precursor                   | n[145]TEGQFVDLTGNR               | 2 | 740.8793 | 2.702 | 0.274 |
| 169 | IPI00004373    | 0.9989 | 10.1 | 1.03 | 0.04 | 2 | 2 | MBL2 Mannose-binding protein C precursor                   | n[145]SPDGDSSLAASER              | 2 | 718.3427 | 3.606 | 0.29  |
| 170 | IPI00030205    | 0.9986 | 8.3  | 0.78 | 0    | 2 | 2 | IGKV3-20 Ig kappa chain V-III region HAH precursor         | n[145]LLIYGASSR                  | 2 | 562.3332 | 2.762 | 0.131 |
| 170 | IPI00030205    | 0.9986 | 8.3  | 0.78 | 0    | 2 | 2 | IGKV3-20 Ig kappa chain V-III region HAH precursor         | LLIYGASSR                        | 2 | 560.3297 | 2.16  | 0.09  |
| 171 | IPI00064667    | 0.9985 | 5.5  | 1.14 | 0.09 | 3 | 3 | CNDP1 Beta-Ala-His dipeptidase precursor                   | KPAITYGTR                        | 2 | 643.8826 | 1.796 | 0.206 |
| 171 | IPI00064667    | 0.9985 | 5.5  | 1.14 | 0.09 | 3 | 3 | CNDP1 Beta-Ala-His dipeptidase precursor                   | n[145]HLEDVFSK[272]              | 2 | 631.8528 | 2.197 | 0.141 |
| 171 | IPI00064667    | 0.9985 | 5.5  | 1.14 | 0.09 | 3 | 3 | CNDP1 Beta-Ala-His dipeptidase precursor                   | n[145]AITYGTR                    | 2 | 463.2648 | 2.27  | 0.083 |
| 172 | IPI00719373    | 0.998  | 11.7 | 0.8  | 0    | 1 | 2 | IGL@ IGL@ protein                                          | SYSCQVTHEGSTVEK                  | 3 | 660.9767 | 4.441 | 0.439 |
| 172 | IPI00719373    | 0.998  | 11.7 | 0.8  | 0    | 1 | 2 | IGL@ IGL@ protein                                          | n[145]AGVETTK[272]PSK[272]       | 3 | 483.9594 | 2.503 | 0.283 |
| 173 | IPI00167638    | 0.9976 | 3.3  | 0.77 | 0.08 | 5 | 2 | GTPBP10 Isoform 1 of GTP-binding protein 10                | n[145]ELEYK[272]                 | 2 | 541.8205 | 2.222 | 0.081 |
| 173 | IPI00167638    | 0.9976 | 3.3  | 0.77 | 0.08 | 5 | 2 | GTPBP10 Isoform 1 of GTP-binding protein 10                | ELEYK                            | 2 | 537.8134 | 1.954 | 0.098 |
| 174 | IPI00413626    | 0.9969 | 3.4  | 0.93 | 0.01 | 4 | 2 | SUNC1 Isoform 1 of Sad1/unc-84 domain-containing protein 1 | n[145]EQLELLK[272]               | 2 | 580.8601 | 1.949 | 0.036 |
| 174 | IPI00413626    | 0.9969 | 3.4  | 0.93 | 0.01 | 4 | 2 | SUNC1 Isoform 1 of Sad1/unc-84 domain-containing protein 1 | EQLELLK                          | 2 | 576.853  | 2.393 | 0.051 |
| 175 | IPI00022389    | 0.9967 | 16.5 | 0.44 | 0.11 | 2 | 2 | CRP Isoform 1 of C-reactive protein precursor              | KAFVFPK                          | 3 | 419.6008 | 2.912 | 0.172 |
| 175 | IPI00022389    | 0.9967 | 16.5 | 0.44 | 0.11 | 2 | 2 | CRP Isoform 1 of C-reactive protein precursor              | n[145]APLTK[272]PLK[272]         | 3 | 433.9623 | 1.693 | 0.029 |
| 176 | IPI00293011    | 0.9959 | 2.1  | 0.79 | 0    | 2 | 2 | TCP11L1 cDNA FLJ11386 fis                                  | ELEEVAIK                         | 2 | 605.8558 | 2.906 | 0.029 |



|     |                |        |      |      |      |     |   |                                                           |                              |   |           |       |       |
|-----|----------------|--------|------|------|------|-----|---|-----------------------------------------------------------|------------------------------|---|-----------|-------|-------|
| 176 | IPI00293011    | 0.9959 | 2.1  | 0.79 | 0    | 2   | 2 | TCP11L1 cDNA FLJ11386 fis                                 | n[145]ELEEVAIK[272]          | 2 | 609.8629  | 2.489 | 0.067 |
| 177 | IPI00218795    | 0.9958 | 4.9  | 0.74 | 0.04 | 2   | 2 | SELL L-selectin precursor                                 | AEIEYLEK                     | 2 | 637.8532  | 2.578 | 0.23  |
| 177 | IPI00218795    | 0.9958 | 4.9  | 0.74 | 0.04 | 2   | 2 | SELL L-selectin precursor                                 | NKEDCVEIYIK                  | 3 | 607.3197  | 2.921 | 0.127 |
| 178 | IPI00215977    | 0.9957 | 2.7  | 0.74 | 0    | 2   | 2 | IGF2 Isoform 2 of Insulin-like growth factor II precursor | GFYFR                        | 2 | 415.2214  | 1.957 | 0.155 |
| 178 | IPI00215977    | 0.9957 | 2.7  | 0.74 | 0    | 2   | 2 | IGF2 Isoform 2 of Insulin-like growth factor II precursor | n[145]GFYFR                  | 2 | 417.225   | 1.91  | 0.02  |
| 179 | IPI00296537    | 0.9899 | 7.9  | 1.03 | 0    | 2   | 1 | FBLN1 Isoform C of Fibulin-1 precursor                    | KVSPHSGVVALTKPVPEPR          | 4 | 605.3641  | 2.189 | 0.036 |
| 179 | IPI00296537    | 0.9899 | 7.9  | 1.03 | 0    | 2   | 1 | FBLN1 Isoform C of Fibulin-1 precursor                    | GYHLNEEGTR                   | 3 | 439.2178  | 2.718 | 0.267 |
| 179 | IPI00296537    | 0.9899 | 7.9  | 1.03 | 0    | 2   | 1 | FBLN1 Isoform C of Fibulin-1 precursor                    | GYHLNEEGTR                   | 2 | 658.3231  | 3.381 | 0.441 |
| 179 | IPI00296537    | 0.9899 | 7.9  | 1.03 | 0    | 2   | 1 | FBLN1 Isoform C of Fibulin-1 precursor                    | n[145]TGYYFDGISR             | 2 | 661.8285  | 3.472 | 0.317 |
| 179 | IPI00296537    | 0.9899 | 7.9  | 1.03 | 0    | 2   | 1 | FBLN1 Isoform C of Fibulin-1 precursor                    | n[145]GYHLNEEGTR             | 2 | 660.3267  | 3.053 | 0.323 |
| 179 | IPI00296537    | 0.9899 | 7.9  | 1.03 | 0    | 2   | 1 | FBLN1 Isoform C of Fibulin-1 precursor                    | n[145]GYHLNEEGTR             | 3 | 440.5535  | 2.216 | 0.23  |
| 179 | IPI00296537    | 0.9899 | 7.9  | 1.03 | 0    | 2   | 1 | FBLN1 Isoform C of Fibulin-1 precursor                    | TGYYFDGISR                   | 2 | 659.825   | 2.693 | 0.292 |
| 179 | IPI00296537    | 0.9899 | 7.9  | 1.03 | 0    | 2   | 1 | FBLN1 Isoform C of Fibulin-1 precursor                    | NVPNCGR                      | 2 | 473.2233  | 1.645 | 0.029 |
| 179 | IPI00296537    | 0.9899 | 7.9  | 1.03 | 0    | 2   | 1 | FBLN1 Isoform C of Fibulin-1 precursor                    | SCPSSGYR                     | 2 | 521.7259  | 2.538 | 0.179 |
| 180 | IPI00444845    | 0.9854 | 1.6  | 0.44 | 0.09 | 2   | 2 | ZBTB47 Zinc finger and BTB domain-containing protein 47   | n[145]VK[272]LEEK[272]       | 3 | 393.2554  | 2.257 | 0.17  |
| 180 | IPI00444845    | 0.9854 | 1.6  | 0.44 | 0.09 | 2   | 2 | ZBTB47 Zinc finger and BTB domain-containing protein 47   | n[145]VK[272]LEEK[272]       | 2 | 589.3795  | 2.115 | 0.146 |
| 181 | IPI00025829    | 0.9824 | 2.7  | 0.63 | 0    | 2   | 2 | CYP2B6 Cytochrome P450 2B6                                | n[145]FHYQDQEFK[272]         | 2 | 821.9271  | 2.738 | 0.044 |
| 181 | IPI00025829    | 0.9824 | 2.7  | 0.63 | 0    | 2   | 2 | CYP2B6 Cytochrome P450 2B6                                | FHYQDQEFK                    | 2 | 817.92    | 2.788 | 0.012 |
| 182 | IPI00296099    | 0.9819 | 1.6  | 0.2  | 0    | 1   | 1 | THBS1 Thrombospondin-1 precursor                          | n[145]FVFGTTPEDILR           | 2 | 769.9204  | 3.407 | 0.267 |
| 182 | IPI00296099    | 0.9819 | 1.6  | 0.2  | 0    | 1   | 1 | THBS1 Thrombospondin-1 precursor                          | n[145]YECR                   | 2 | 380.6656  | 1.459 | 0.182 |
| 182 | IPI00296099    | 0.9819 | 1.6  | 0.2  | 0    | 1   | 1 | THBS1 Thrombospondin-1 precursor                          | SVK[272]                     | 1 | 617.4104  | 0.88  | 0.378 |
| 183 | IPI00000856    | 0.9804 | 0.7  | 0.14 | 0.08 | 3   | 2 | FERMT2 Isoform 1 of Fermitin family homolog 2             | n[145]YDAIR                  | 1 | 781.4325  | 1.827 | 0.181 |
| 183 | IPI00000856    | 0.9804 | 0.7  | 0.14 | 0.08 | 3   | 2 | FERMT2 Isoform 1 of Fermitin family homolog 2             | n[145]DVTIR                  | 2 | 374.2277  | 1.629 | 0.02  |
| 184 | IPI00304189    | 0.9779 | 2.5  | 1    | 0.1  | 3   | 2 | OPTN Isoform 1 of Optineurin                              | LKEEIGK                      | 2 | 618.8874  | 3.068 | 0.174 |
| 184 | IPI00304189    | 0.9779 | 2.5  | 1    | 0.1  | 3   | 2 | OPTN Isoform 1 of Optineurin                              | n[145]LK[272]EELGK[272]      | 2 | 624.8981  | 2.905 | 0.186 |
| 184 | IPI00304189    | 0.9779 | 2.5  | 1    | 0.1  | 3   | 2 | OPTN Isoform 1 of Optineurin                              | n[145]LK[272]EELGK[272]      | 3 | 416.9345  | 2.515 | 0.138 |
| 184 | IPI00304189    | 0.9779 | 2.5  | 1    | 0.1  | 3   | 2 | OPTN Isoform 1 of Optineurin                              | SVK[272]                     | 1 | 617.4104  | 0.88  | 0.378 |
| 184 | IPI00304189    | 0.9779 | 2.5  | 1    | 0.1  | 3   | 2 | OPTN Isoform 1 of Optineurin                              | EM[147]K                     | 1 | 703.3808  | 1.121 | 0.072 |
| 185 | IPI00010390    | 0.9776 | 1.4  | 29.1 | 5.74 | 5   | 2 | SAMD4A SAMD4A protein                                     | VEYM[147]KLLPK               | 2 | 778.9653  | 2.387 | 0.035 |
| 185 | IPI00010390    | 0.9776 | 1.4  | 29.1 | 5.74 | 5   | 2 | SAMD4A SAMD4A protein                                     | VEYM[147]K[272]LLPK[272]     | 2 | 782.9724  | 2.441 | 0.065 |
| 185 | IPI00010390    | 0.9776 | 1.4  | 29.1 | 5.74 | 5   | 2 | SAMD4A SAMD4A protein                                     | VEYM[147]KL                  | 1 | 1078.5966 | 1.723 | 0.131 |
| 186 | IPI00014826    | 0.976  | 2.7  | 0.76 | 0    | 3   | 2 | BNC2 Isoform 2 of Zinc finger protein basonuclin-2        | EGQAVAVPSSK                  | 2 | 676.8803  | 2.398 | 0.012 |
| 186 | IPI00014826    | 0.976  | 2.7  | 0.76 | 0    | 3   | 2 | BNC2 Isoform 2 of Zinc finger protein basonuclin-2        | n[145]EGQAVAVPSSK[272]       | 2 | 680.8874  | 2.383 | 0.02  |
| 187 | IPI00216704    | 0.9748 | 1    | 0.75 | 0.01 | 3   | 2 | SPTB Isoform 2 of Spectrin beta chain                     | n[145]DSPDVTHR               | 2 | 535.771   | 1.665 | 0.009 |
| 187 | IPI00216704    | 0.9748 | 1    | 0.75 | 0.01 | 3   | 2 | SPTB Isoform 2 of Spectrin beta chain                     | GAEILGLIDEK[272]             | 3 | 481.2843  | 2.752 | 0.22  |
| 187 | IPI00216704    | 0.9748 | 1    | 0.75 | 0.01 | 3   | 2 | SPTB Isoform 2 of Spectrin beta chain                     | EM[147]K                     | 1 | 703.3808  | 1.121 | 0.072 |
| 188 | IPI00154742    | 0.9738 | 10.7 | 0.7  | 0    | 1   | 1 | IGL@ IGL@ protein                                         | SYSCQVTHEGSTVEK              | 3 | 660.9767  | 4.441 | 0.439 |
| 188 | IPI00154742    | 0.9738 | 10.7 | 0.7  | 0    | 1   | 1 | IGL@ IGL@ protein                                         | n[145]AGVETTPSK[272]         | 2 | 639.8608  | 3.005 | 0.303 |
| 189 | gi 1082558 pir | 0.9719 | 2.6  | 0.67 | 0    | 1   | 1 | KRT9 Keratin                                              | n[145]FSSSSGYGGGSSR          | 2 | 690.319   | 3.905 | 0.485 |
| 189 | gi 1082558 pir | 0.9719 | 2.6  | 0.67 | 0    | 1   | 1 | KRT9 Keratin                                              | SK[272]K[272]                | 2 | 395.7731  | 0.913 | 0.136 |
| 190 | IPI00032293    | 0.9719 | 11.6 | 0.64 | 0    | 3   | 1 | CST3 Cystatin-C precursor                                 | n[145]TQPNDNCPFHDQPHLK[272]  | 4 | 585.2882  | 3.915 | 0.414 |
| 191 | IPI00418437    | 0.9719 | 2.8  | 12.8 | 0    | 1   | 1 | KLHL17 Kelch-like protein 17                              | SCSPYFHAM[147]FTNEM[147]SESR | 5 | 469.1927  | 2.676 | 0.33  |
| 192 | IPI00005292    | 0.9692 | 1.8  | N_A  | N_A  | N_A | 1 | SPOCK1 Testican-1 precursor                               | n[145]CNEEGYYK               | 3 | 445.8658  | 2.811 | 0.33  |
| 193 | IPI00023283    | 0.967  | 0.8  | 0.68 | 0.4  | 11  | 5 | TTN Isoform 2 of Titin                                    | AILK                         | 2 | 362.7577  | 1.441 | 1     |
| 193 | IPI00023283    | 0.967  | 0.8  | 0.68 | 0.4  | 11  | 5 | TTN Isoform 2 of Titin                                    | SLAVPIVAK[272]               | 3 | 394.5961  | 1.278 | 0.236 |
| 193 | IPI00023283    | 0.967  | 0.8  | 0.68 | 0.4  | 11  | 5 | TTN Isoform 2 of Titin                                    | SVK[272]                     | 1 | 617.4104  | 0.88  | 0.378 |
| 193 | IPI00023283    | 0.967  | 0.8  | 0.68 | 0.4  | 11  | 5 | TTN Isoform 2 of Titin                                    | SK[272]K[272]                | 2 | 395.7731  | 0.913 | 0.136 |
| 193 | IPI00023283    | 0.967  | 0.8  | 0.68 | 0.4  | 11  | 5 | TTN Isoform 2 of Titin                                    | VVEVK                        | 2 | 427.279   | 2.118 | 0.091 |

|     |             |        |     |      |      |     |   |                                                                  |                                        |   |          |       |       |
|-----|-------------|--------|-----|------|------|-----|---|------------------------------------------------------------------|----------------------------------------|---|----------|-------|-------|
| 193 | IPI00023283 | 0.967  | 0.8 | 0.68 | 0.4  | 11  | 5 | TTN Isoform 2 of Titin                                           | n[145]VSWYSK                           | 2 | 527.2961 | 1.237 | 0.091 |
| 193 | IPI00023283 | 0.967  | 0.8 | 0.68 | 0.4  | 11  | 5 | TTN Isoform 2 of Titin                                           | n[145]LEILSISK[272]                    | 2 | 595.8836 | 2.723 | 0.111 |
| 193 | IPI00023283 | 0.967  | 0.8 | 0.68 | 0.4  | 11  | 5 | TTN Isoform 2 of Titin                                           | n[145]FAIVR                            | 2 | 375.2432 | 2.189 | 0.062 |
| 193 | IPI00023283 | 0.967  | 0.8 | 0.68 | 0.4  | 11  | 5 | TTN Isoform 2 of Titin                                           | n[145]YVFR                             | 2 | 364.7142 | 1.594 | 0.143 |
| 193 | IPI00023283 | 0.967  | 0.8 | 0.68 | 0.4  | 11  | 5 | TTN Isoform 2 of Titin                                           | n[145]DSMRGDSGR                        | 2 | 562.7654 | 1.804 | 0.097 |
| 193 | IPI00023283 | 0.967  | 0.8 | 0.68 | 0.4  | 11  | 5 | TTN Isoform 2 of Titin                                           | n[145]EALLK[272]                       | 2 | 431.2861 | 1.702 | 0.145 |
| 193 | IPI00023283 | 0.967  | 0.8 | 0.68 | 0.4  | 11  | 5 | TTN Isoform 2 of Titin                                           | n[145]ELLVK[272]                       | 2 | 445.3017 | 2.078 | 0.148 |
| 193 | IPI00023283 | 0.967  | 0.8 | 0.68 | 0.4  | 11  | 5 | TTN Isoform 2 of Titin                                           | LEILSISK                               | 2 | 591.8765 | 2.187 | 0.107 |
| 193 | IPI00023283 | 0.967  | 0.8 | 0.68 | 0.4  | 11  | 5 | TTN Isoform 2 of Titin                                           | n[145]IVEYR                            | 2 | 412.2434 | 1.932 | 0.032 |
| 193 | IPI00023283 | 0.967  | 0.8 | 0.68 | 0.4  | 11  | 5 | TTN Isoform 2 of Titin                                           | EAIK                                   | 2 | 427.279  | 1.917 | 0.224 |
| 193 | IPI00023283 | 0.967  | 0.8 | 0.68 | 0.4  | 11  | 5 | TTN Isoform 2 of Titin                                           | EM[147]K                               | 1 | 703.3808 | 1.121 | 0.072 |
| 193 | IPI00023283 | 0.967  | 0.8 | 0.68 | 0.4  | 11  | 5 | TTN Isoform 2 of Titin                                           | ELLVK                                  | 2 | 441.2946 | 1.881 | 0.208 |
| 193 | IPI00023283 | 0.967  | 0.8 | 0.68 | 0.4  | 11  | 5 | TTN Isoform 2 of Titin                                           | IVEYR                                  | 2 | 410.2398 | 1.544 | 0.072 |
| 193 | IPI00023283 | 0.967  | 0.8 | 0.68 | 0.4  | 11  | 5 | TTN Isoform 2 of Titin                                           | YLK                                    | 2 | 352.7263 | 1.622 | 0.012 |
| 193 | IPI00023283 | 0.967  | 0.8 | 0.68 | 0.4  | 11  | 5 | TTN Isoform 2 of Titin                                           | n[145]VPVPVPK[272]                     | 2 | 512.3439 | 1.021 | 0.025 |
| 193 | IPI00023283 | 0.967  | 0.8 | 0.68 | 0.4  | 11  | 5 | TTN Isoform 2 of Titin                                           | INGSEPLQ                               | 2 | 499.2693 | 1.559 | 0.112 |
| 193 | IPI00023283 | 0.967  | 0.8 | 0.68 | 0.4  | 11  | 5 | TTN Isoform 2 of Titin                                           | n[145]TYDGGSK                          | 2 | 506.265  | 1.936 | 0.094 |
| 193 | IPI00023283 | 0.967  | 0.8 | 0.68 | 0.4  | 11  | 5 | TTN Isoform 2 of Titin                                           | n[145]EVVLK[272]                       | 2 | 438.2939 | 1.642 | 0.018 |
| 193 | IPI00023283 | 0.967  | 0.8 | 0.68 | 0.4  | 11  | 5 | TTN Isoform 2 of Titin                                           | LELK                                   | 2 | 391.7604 | 1.578 | 1     |
| 193 | IPI00023283 | 0.967  | 0.8 | 0.68 | 0.4  | 11  | 5 | TTN Isoform 2 of Titin                                           | n[145]YLVK[272]                        | 2 | 405.77   | 1.349 | 0.275 |
| 193 | IPI00023283 | 0.967  | 0.8 | 0.68 | 0.4  | 11  | 5 | TTN Isoform 2 of Titin                                           | n[145]YLVK                             | 2 | 403.7665 | 1.33  | 0.146 |
| 193 | IPI00023283 | 0.967  | 0.8 | 0.68 | 0.4  | 11  | 5 | TTN Isoform 2 of Titin                                           | GDLR                                   | 1 | 600.3464 | 1.375 | 0.017 |
| 193 | IPI00023283 | 0.967  | 0.8 | 0.68 | 0.4  | 11  | 5 | TTN Isoform 2 of Titin                                           | SVAK                                   | 2 | 342.7238 | 0.841 | 0.121 |
| 194 | IPI00099131 | 0.9662 | 2.1 | 0.88 | 0.04 | 2   | 2 | ZC3H7B Isoform 1 of Zinc finger CCCH domain-containing protein 7 | n[145]ALNELGR                          | 2 | 458.7703 | 1.884 | 0.163 |
| 194 | IPI00099131 | 0.9662 | 2.1 | 0.88 | 0.04 | 2   | 2 | ZC3H7B Isoform 1 of Zinc finger CCCH domain-containing protein 7 | n[145]ADIEK[272]                       | 2 | 432.2575 | 2.035 | 0.149 |
| 194 | IPI00099131 | 0.9662 | 2.1 | 0.88 | 0.04 | 2   | 2 | ZC3H7B Isoform 1 of Zinc finger CCCH domain-containing protein 7 | SK[272]K[272]                          | 2 | 395.7731 | 0.913 | 0.136 |
| 195 | IPI00167547 | 0.9638 | 1.9 | 0    | 0    | 3   | 1 | BRWD3 Isoform 1 of Bromodomain and WD repeat-containing prote    | n[145]AAAPTQIEALYYLIAR                 | 4 | 510.0339 | 2.868 | 0.054 |
| 195 | IPI00167547 | 0.9638 | 1.9 | 0    | 0    | 3   | 1 | BRWD3 Isoform 1 of Bromodomain and WD repeat-containing prote    | n[145]TAVNNFLLK[272]                   | 2 | 654.3999 | 1.98  | 0.033 |
| 196 | IPI00646328 | 0.9589 | 1.1 | 1.04 | 0.06 | 3   | 2 | FRMPD1 FERM and PDZ domain-containing protein 1                  | DIILTVK                                | 2 | 541.3527 | 1.97  | 0.171 |
| 196 | IPI00646328 | 0.9589 | 1.1 | 1.04 | 0.06 | 3   | 2 | FRMPD1 FERM and PDZ domain-containing protein 1                  | n[145]DIILTVK[272]                     | 2 | 545.3598 | 1.479 | 0.064 |
| 196 | IPI00646328 | 0.9589 | 1.1 | 1.04 | 0.06 | 3   | 2 | FRMPD1 FERM and PDZ domain-containing protein 1                  | n[145]YSISR                            | 2 | 385.2199 | 1.799 | 0.061 |
| 196 | IPI00646328 | 0.9589 | 1.1 | 1.04 | 0.06 | 3   | 2 | FRMPD1 FERM and PDZ domain-containing protein 1                  | SVK[272]                               | 1 | 617.4104 | 0.88  | 0.378 |
| 196 | IPI00646328 | 0.9589 | 1.1 | 1.04 | 0.06 | 3   | 2 | FRMPD1 FERM and PDZ domain-containing protein 1                  | EM[147]K                               | 1 | 703.3808 | 1.121 | 0.072 |
| 197 | IPI00384280 | 0.9558 | 1.8 | 0.59 | 0.02 | 2   | 1 | PCYOX1 Prenylcysteine oxidase 1 precursor                        | n[145]CPSIHLDR                         | 3 | 415.2184 | 3.436 | 0.196 |
| 198 | IPI00022331 | 0.9531 | 3.2 | 0.88 | 0    | 1   | 1 | LCAT Phosphatidylcholine-sterol acyltransferase precursor        | n[145]SSGLVSNAPGVQIR                   | 2 | 764.9318 | 4.02  | 0.414 |
| 199 | IPI00168611 | 0.9453 | 4.3 | 0.77 | 0    | 1   | 1 | SLC17A8 Isoform 1 of Vesicular glutamate transporter 3           | n[145]IMNCGFGM[147]EATLLLTVGFSHTK[272] | 4 | 694.6041 | 2.885 | 0.288 |
| 200 | IPI00000111 | 0.945  | 1.1 | 0.64 | 0    | 2   | 2 | CHST9 GalNAc-4-sulfotransferase 2                                | n[145]AIKK[272]K[272]                  | 2 | 502.8633 | 1.788 | 0.11  |
| 200 | IPI00000111 | 0.945  | 1.1 | 0.64 | 0    | 2   | 2 | CHST9 GalNAc-4-sulfotransferase 2                                | AIKK                                   | 2 | 496.8526 | 1.656 | 0.26  |
| 201 | IPI00009329 | 0.9443 | 1.1 | 0.7  | 0    | 1   | 2 | UTRN Utrophin                                                    | n[145]DLTQEM[147]EVHAEK                | 3 | 577.2898 | 2.202 | 0.098 |
| 201 | IPI00009329 | 0.9443 | 1.1 | 0.7  | 0    | 1   | 2 | UTRN Utrophin                                                    | n[145]LPDK[272]K[272]                  | 2 | 516.8426 | 1.673 | 0.019 |
| 201 | IPI00009329 | 0.9443 | 1.1 | 0.7  | 0    | 1   | 2 | UTRN Utrophin                                                    | SK[272]K[272]                          | 2 | 395.7731 | 0.913 | 0.136 |
| 201 | IPI00009329 | 0.9443 | 1.1 | 0.7  | 0    | 1   | 2 | UTRN Utrophin                                                    | AILK                                   | 2 | 362.7577 | 1.441 | 1     |
| 201 | IPI00009329 | 0.9443 | 1.1 | 0.7  | 0    | 1   | 2 | UTRN Utrophin                                                    | SVK[272]                               | 1 | 617.4104 | 0.88  | 0.378 |
| 201 | IPI00009329 | 0.9443 | 1.1 | 0.7  | 0    | 1   | 2 | UTRN Utrophin                                                    | EM[147]K                               | 1 | 703.3808 | 1.121 | 0.072 |
| 202 | IPI00328317 | 0.9427 | 10  | 0.25 | 0    | 1   | 1 | CPLX4 Complexin-4 precursor                                      | n[145]EEGGASDPAAAQGM[147]TR            | 3 | 569.929  | 2.686 | 0.281 |
| 203 | IPI00294926 | 0.9376 | 9.1 | N_A  | N_A  | N_A | 1 | CBX6 Chromobox protein homolog 6                                 | EFCNPEDFEKVAAGVAGAAGGGGSIGASK[272]     | 5 | 634.1142 | 2.702 | 0.297 |
| 203 | IPI00294926 | 0.9376 | 9.1 | N_A  | N_A  | N_A | 1 | CBX6 Chromobox protein homolog 6                                 | SK[272]K[272]                          | 2 | 395.7731 | 0.913 | 0.136 |
| 203 | IPI00294926 | 0.9376 | 9.1 | N_A  | N_A  | N_A | 1 | CBX6 Chromobox protein homolog 6                                 | n[145]YLVK[272]                        | 2 | 405.77   | 1.349 | 0.275 |

|     |             |        |     |      |      |     |   |                                                           |                                           |   |          |       |       |
|-----|-------------|--------|-----|------|------|-----|---|-----------------------------------------------------------|-------------------------------------------|---|----------|-------|-------|
| 203 | IPI00294926 | 0.9376 | 9.1 | N_A  | N_A  | N_A | 1 | CBX6 Chromobox protein homolog 6                          | n[145]YLVK                                | 2 | 403.7665 | 1.33  | 0.146 |
| 204 | IPI00000276 | 0.9305 | 4.4 | 0.75 | 0    | 2   | 2 | CYorf15B Uncharacterized protein CYorf15B                 | n[145]VFQIK[272]                          | 2 | 461.8019 | 1.87  | 0.006 |
| 204 | IPI00000276 | 0.9305 | 4.4 | 0.75 | 0    | 2   | 2 | CYorf15B Uncharacterized protein CYorf15B                 | VFQIK                                     | 2 | 457.7948 | 1.499 | 0.056 |
| 204 | IPI00000276 | 0.9305 | 4.4 | 0.75 | 0    | 2   | 2 | CYorf15B Uncharacterized protein CYorf15B                 | SVK[272]                                  | 1 | 617.4104 | 0.88  | 0.378 |
| 205 | IPI00292807 | 0.9289 | 3.3 | 0.85 | 0    | 1   | 1 | PHF8 Putative uncharacterized protein                     | M[147]DTYSHQALK                           | 2 | 745.3771 | 3.476 | 0.325 |
| 206 | IPI00031410 | 0.9275 | 0.6 | N_A  | N_A  | N_A | 1 | FRAP1 FKBP12-rapamycin complex-associated protein         | STLVESRCCRDLM[147]EEK[272]                | 3 | 764.3529 | 4.485 | 0.278 |
| 207 | IPI00013179 | 0.925  | 10  | 0.81 | 0    | 1   | 1 | PTGDS Prostaglandin-H2 D-isomerase precursor              | n[145]TM[147]LLQPAGSLGYSYSYR              | 2 | 952.4889 | 3.484 | 0.325 |
| 208 | IPI00006675 | 0.9243 | 1.6 | 1.5  | 0.41 | 3   | 3 | ABCC4 Multidrug resistance-associated protein 4           | n[145]AEAAALTETAK                         | 2 | 680.3837 | 1.931 | 0.029 |
| 208 | IPI00006675 | 0.9243 | 1.6 | 1.5  | 0.41 | 3   | 3 | ABCC4 Multidrug resistance-associated protein 4           | AEAAALTETAK                               | 2 | 678.3801 | 1.943 | 0.006 |
| 208 | IPI00006675 | 0.9243 | 1.6 | 1.5  | 0.41 | 3   | 3 | ABCC4 Multidrug resistance-associated protein 4           | LSAVDAEVSRSR                              | 2 | 593.825  | 2.041 | 0.101 |
| 209 | IPI00514002 | 0.9213 | 1.1 | 0.9  | 0    | 2   | 2 | STARD9 Isoform 1 of StAR-related lipid transfer protein 9 | NNGQFVK                                   | 2 | 543.8064 | 2.185 | 0.061 |
| 209 | IPI00514002 | 0.9213 | 1.1 | 0.9  | 0    | 2   | 2 | STARD9 Isoform 1 of StAR-related lipid transfer protein 9 | n[145]NNGQFVK[272]                        | 2 | 547.8135 | 1.803 | 0.076 |
| 209 | IPI00514002 | 0.9213 | 1.1 | 0.9  | 0    | 2   | 2 | STARD9 Isoform 1 of StAR-related lipid transfer protein 9 | SK[272]K[272]                             | 2 | 395.7731 | 0.913 | 0.136 |
| 210 | IPI00026216 | 0.916  | 1.8 | 1.62 | 0.31 | 3   | 2 | NPEPPS Puromycin-sensitive aminopeptidase                 | AGIISTVEVLK                               | 2 | 705.44   | 2.989 | 0.053 |
| 210 | IPI00026216 | 0.916  | 1.8 | 1.62 | 0.31 | 3   | 2 | NPEPPS Puromycin-sensitive aminopeptidase                 | n[145]AGIISTVEVLK[272]                    | 2 | 709.4471 | 2.311 | 0.022 |
| 210 | IPI00026216 | 0.916  | 1.8 | 1.62 | 0.31 | 3   | 2 | NPEPPS Puromycin-sensitive aminopeptidase                 | n[145]GHLDAL                              | 2 | 385.2199 | 1.797 | 0.033 |
| 211 | IPI00218414 | 0.9152 | 3.8 | 0.84 | 0    | 1   | 1 | CA2 Carbonic anhydrase 2                                  | n[145]VGSAAK[272]PGLQK[272]               | 3 | 472.9682 | 2.483 | 0.245 |
| 212 | IPI00384419 | 0.9098 | 1.5 | 0.71 | 0.02 | 4   | 2 | TDRD9 tudor domain containing 9                           | n[145]SSEVEYINK                           | 2 | 676.8626 | 1.681 | 0.095 |
| 212 | IPI00384419 | 0.9098 | 1.5 | 0.71 | 0.02 | 4   | 2 | TDRD9 tudor domain containing 9                           | n[145]NVDFQK[272]                         | 2 | 519.7948 | 2.392 | 0     |
| 212 | IPI00384419 | 0.9098 | 1.5 | 0.71 | 0.02 | 4   | 2 | TDRD9 tudor domain containing 9                           | NVDFQK                                    | 2 | 515.7877 | 2.103 | 0.012 |
| 212 | IPI00384419 | 0.9098 | 1.5 | 0.71 | 0.02 | 4   | 2 | TDRD9 tudor domain containing 9                           | SEILK                                     | 2 | 435.2764 | 1.848 | 0.099 |
| 213 | IPI00008603 | 0.9079 | 2.7 | 0.74 | 0    | 2   | 1 | ACTA2 Actin                                               | AGFAGDDAPR                                | 2 | 558.7753 | 2.499 | 0.405 |
| 214 | IPI00178743 | 0.9074 | 1.4 | 0.57 | 0    | 1   | 2 | ALMS1 ALMS1                                               | n[145]QIQVNISDFEGHSNPEGTPVFADRLPEK[272]MK | 5 | 763.1994 | 3.083 | 0.285 |
| 214 | IPI00178743 | 0.9074 | 1.4 | 0.57 | 0    | 1   | 2 | ALMS1 ALMS1                                               | SPLQEAEK                                  | 2 | 634.8459 | 2.084 | 0.006 |
| 214 | IPI00178743 | 0.9074 | 1.4 | 0.57 | 0    | 1   | 2 | ALMS1 ALMS1                                               | SVK[272]                                  | 1 | 617.4104 | 0.88  | 0.378 |
| 214 | IPI00178743 | 0.9074 | 1.4 | 0.57 | 0    | 1   | 2 | ALMS1 ALMS1                                               | SK[272]K[272]                             | 2 | 395.7731 | 0.913 | 0.136 |
| 214 | IPI00178743 | 0.9074 | 1.4 | 0.57 | 0    | 1   | 2 | ALMS1 ALMS1                                               | EM[147]K                                  | 1 | 703.3808 | 1.121 | 0.072 |
| 215 | IPI00019447 | 0.9039 | 1.3 | 0.93 | 0.05 | 2   | 2 | FANCI Isoform 1 of Fanconi anemia group I protein         | n[145]SLNYTGEK[272]K[272]                 | 2 | 736.4277 | 2.47  | 0.029 |
| 215 | IPI00019447 | 0.9039 | 1.3 | 0.93 | 0.05 | 2   | 2 | FANCI Isoform 1 of Fanconi anemia group I protein         | n[145]SLNYTGEK[272]                       | 2 | 600.3292 | 1.852 | 0.047 |
| 215 | IPI00019447 | 0.9039 | 1.3 | 0.93 | 0.05 | 2   | 2 | FANCI Isoform 1 of Fanconi anemia group I protein         | LLLLK                                     | 2 | 440.3232 | 1.8   | 1     |
| 215 | IPI00019447 | 0.9039 | 1.3 | 0.93 | 0.05 | 2   | 2 | FANCI Isoform 1 of Fanconi anemia group I protein         | SK[272]K[272]                             | 2 | 395.7731 | 0.913 | 0.136 |

<sup>a</sup>accession number, protein accession number under human International Protein Index database; <sup>b</sup>SD, standard deviation; <sup>c</sup>XNP, the number of a quantified peptide by EXPRESS; <sup>d</sup>USP, the number of a unique stripped peptide;
